# Supplementary material for: Association of high-risk sexual behaviour with diversity of the vaginal microbiota and abundance of Lactobacillus
Source: PubMed Central journal article supplement (PMC5667760; doi:10.1371/journal.pone.0187612), 2017-11-02
Supplement: pone.0187612.s001.pdf [file pone.0187612.s001.pdf]

CLUSTAL O(1.2.4) multiple sequence alignment

```

AY724739.1 ----- 0
AY959097.1 TTCGCCCTTAGAGTTTGGATCCTGGCTCAGGATGAACGCTGGCGGCGTGCTTAACACATGC 60
OTU5 ----- 0

AY724739.1 ----- 0
AY959097.1 AAGTCGAACGAAGTGCTACGACGGAAGTTTTTCGGACGGAAGATGTAGTTACTTAGTGGCG 120
OTU5 ----- 0

AY724739.1 ----- 0
AY959097.1 GACGGGTGAGTAACGCGTGGGGAACCTGCCCTGTACCGGGGGATAGCAGCCGGAACGGC 180
OTU5 ----- 0

AY724739.1 ----- 0
AY959097.1 TGATAATACCGCATAAGCGCACGAATGTCGCATGACATGGTGTGAAAACTCCGGTGGTA 240
OTU5 ----- 0

AY724739.1 ----- 0
AY959097.1 TAGGATGGACCCGCGTCTGATTAGCCGGTTGGTGGGGTAAAAGCCTACCAAAGCGAAGAT 300
OTU5 ----- 0

AY724739.1 ----- 0
AY959097.1 CAGTAGCCGAGTTGAGAGACTGACCGGCCACATTGGGACTGAGACACGGCCCAGACTCCT 360
OTU5 ----- 0

AY724739.1 -----TGGGGAATATTGCACAATGGGCGAAAGCCTGATGCAGCGACGCCGC 46
AY959097.1 ACGGGAGGCAGCAGTGGGGAATATTGCACAATGGGCGAAAGCCTGATGCAGCGACGCCGC 420
OTU5 -----TGGGGAATATTGCACAATGGGCGAAAGCCTGATGCAGCGACGCCGC 46
*****

AY724739.1 GTGAGCGAAGAAGTATTTTCGGTATGTAAAGCTCTATCAGAAGGGAAGAAAATGACGGTAC 106
AY959097.1 GTGAGCGAAGAAGTATTTTCGGTATGTAAAGCTCTATCAGAAGGGAAGAAAATGACGGTAC 480
OTU5 GTGAGCGAAGAAGTATTTTCGGTATGTAAAGCTCTATCAGAAGGGAAGAAAATGACGGTAC- 105
*****

AY724739.1 CTTACTAAGAAGCTCCGGCTAAATACGTGCCAGCAGCCGCGGTAATACGTATGGAGCAAG 166
AY959097.1 CTTACTAAGAAGCTCCGGCTAAATACGTGCCAGCAGCCGCGGTAATACGTATGGAGCAAG 540
OTU5 ----- 105

AY724739.1 CGTTATCCGGATTTACTGGGTGTAAAGGGAGTGTAGGCGGCACTATAAGTCTGATGTGAA 226
AY959097.1 CGTTATCCGGATTTACTGGGTGTAAAGGGAGTGTAGGCGGCACTATAAGTCTGATGTGAA 600
OTU5 ----- 105

AY724739.1 AACCTAAGGCTTAACCATAGGATTGCATTGGAAACTGTAGAGCTGGAGTATCGGAGAGGC 286
AY959097.1 AACCTAAGGCTTAACCATAGGATTGCATTGGAAACTGTAGAGCTGGAGTATCGGAGAGGT 660
OTU5 ----- 105

AY724739.1 AAGCGGAATTCCTGGTGTAGTGGTGAATACGTAGATATCAGGAAGAACATCGGTGGCGA 346
AY959097.1 AAGCGGAATTCCTGGTGTAGTGGTGAATACGTAGATATCAGGAAGAACATCGGTGGCGA 720
OTU5 ----- 105

```

|            |                                                                |      |
|------------|----------------------------------------------------------------|------|
| AY724739.1 | AGGCGGCTTGCTGGACGATAACTGACGCTAAGGCTCGAAAGCGTGGGAAGCGAACAGGAT   | 406  |
| AY959097.1 | AGGCGGCTTGCTGGACGATAACTGACGCTAAGGCTCGAAAGCGTGGGAAGCGAACAGGAT   | 780  |
| OTU5       | -----                                                          | 105  |
| AY724739.1 | TAGATACCCTGGTAGTCCACGCTGTAAACGATGAACACTAGGTGTTGGGAGGCTAAGCCT   | 466  |
| AY959097.1 | TAGATACCCTGGTAGTCCACGCTGTAAACGATGAACACTAGGTGTTGGGAGGCTAAGCCT   | 840  |
| OTU5       | -----                                                          | 105  |
| AY724739.1 | TTCAGTGCCGCAGCAAACGCAATAAGTGTTCACCTGGGGAGTACGTTGCAAGAATGAA     | 526  |
| AY959097.1 | TTCAGTGCCGCAGCAAACGCAATAAGTGTTCACCTGGGGAGTACGTTGCAAGAATGAA     | 900  |
| OTU5       | -----                                                          | 105  |
| AY724739.1 | ACTCAAAGGAATTGACGGGGACCCGCACAAGCGGTGGAGCATGTGGTTTAATTCGAAGCA   | 586  |
| AY959097.1 | ACTCAAAGGAATTGACGGGGACCCGCACAAGCGGTGGAGCATGTGGTTTAATTCGAAGCA   | 960  |
| OTU5       | -----                                                          | 105  |
| AY724739.1 | ACGCGAAGAACCTTACCAAGTCTTGACATCCCTGTGACAGTATATGTAATGTATATTTTC   | 646  |
| AY959097.1 | ACGCGAAGAACCTTACCAAGTCTTGACATCCCTGTGACAGTATATGTAATGTATATTTTC   | 1020 |
| OTU5       | -----                                                          | 105  |
| AY724739.1 | TACGGAACACAGGAGACAGGTGGTGCATGGTTGTCGTCAGCTCGTGTGTCGTGAGATGTTGG | 706  |
| AY959097.1 | TACGGAACACAGGAGACAGGTGGTGCATGGTTGTCGTCAGCTCGTGTGTCGTGAGATGTTGG | 1080 |
| OTU5       | -----                                                          | 105  |
| AY724739.1 | GTTAAGTCCCGCAACGAGCGCAACCCTTGTACTTAGTAGCCAGCATTAAAGGTGGGCACTC  | 766  |
| AY959097.1 | GTTAAGTCCCGCAACGAGCGCAACCCTTGTACTTAGTAGCCAGCATTAAAGGTGGGCACTC  | 1140 |
| OTU5       | -----                                                          | 105  |
| AY724739.1 | TAAGTAGACTGCCGGGGTGAACCCGGAGGAAGGTGGGGATGACGTCAAATCATCATGCCC   | 826  |
| AY959097.1 | TAAGTAGACTGCCGGGGTGAACCCGGAGGAAGGTGGGGACGACGTCAAATCATCATGCCC   | 1200 |
| OTU5       | -----                                                          | 105  |
| AY724739.1 | CTTATGACTTGGGCTACACACGTGCTACAATGGCGTGAACAGAGGGAAGCGAAGGAGCGA   | 886  |
| AY959097.1 | CTTATGGCTTGGGCTACACACGTGCTACAATGGCGTGAACAGAGGGAAGCGAAGGAGCGA   | 1260 |
| OTU5       | -----                                                          | 105  |
| AY724739.1 | TCCGGAGCAAATCTCATAAAGCACGTCCCAGTTCGGACTGCAGTCTGCAACTCGACTGCA   | 946  |
| AY959097.1 | TCCGGAGCAAATCTCATAAAGCACGTCCCAGTTCGGACTGCAGTCTGCAACTCGACTGCA   | 1320 |
| OTU5       | -----                                                          | 105  |
| AY724739.1 | CGAAGCTGGAATCGCTAGTAATCGCAGATCATCATGCTGCGGTGAATACGTTCCCGGGTC   | 1006 |
| AY959097.1 | CGAAGCTGGAATCGCTAGTAATCGCAGATCATCATGCTGCGGTGAATACGTTCCCGGGTC   | 1380 |
| OTU5       | -----                                                          | 105  |
| AY724739.1 | T-----                                                         | 1007 |
| AY959097.1 | TTGTACACACCCCGTCCACACCATGGGAGTCTGGAATGCCCGAAGTCAGTGGCCAAACC    | 1440 |
| OTU5       | -----                                                          | 105  |
| AY724739.1 | -----                                                          | 1007 |

AY959097.1  
OTU5

GAAAGGATGGAGCTGCCGAAGGCAGGCCCGGTAAGTGGGTGAA 1483  
----- 105
