# Supplementary material for: Association of high-risk sexual behaviour with diversity of the vaginal microbiota and abundance of Lactobacillus
Source: PubMed Central journal article supplement (PMC5667760; doi:10.1371/journal.pone.0187612), 2017-11-02
Supplement: pone.0187612.s002.pdf [file pone.0187612.s002.pdf]

>1 len=127 tot-seq=2525714

TAGGGAATCTCCACAATGGACGCAAGTCTGATGGAGCAACGCCGCGTGAGTGAAGAAGG  
TTTTCGGATCGTAAAGCTCTGTTGTTGGTGAAGAAGGATAGAGGTAGTAACTGGCCTTTA  
TTTGACG

>2 len=152 tot-seq=2335314

TAGGGAATCTCCACAATGGACGCAAGTCTGATGGAGCAACGCCGCGTGAGTGAAGAAGG  
GTTTCGGCTCGTAAAGCTCTGTTGTTGGTGAAGAAGGACAGGGGTAGTAACTGACCTTTG  
TTTGACGGTAATCAATTAGAAAAGTCACGGCTA

>3 len=105 tot-seq=1937626

TGGGGAATATTGCGCAATGGGGGAAACCCTGACGCAGCGACGCCGCGTGCGGGATGAAGG  
CCTTCGGGTTGTAAACCGCTTTTGATTGGGAGCAAGCCTTCGGGT

>4 len=218 tot-seq=629235

TAGGGAATCTTCGGCAATGGGGGCAACCCTGACCGAGCAACGCCGCGTGAGTGAAGAAGG  
TTTTCGGATCGTAAAGCTCTGTTGTAAGAGAAGAACGTGTGTGAGAGTGGAAAGTTCACA  
CAGTGACGGTAACTTACCAGAAAGGGACGGCTAACTACGTGGGGGAGCCGCGGTAATAA  
AAAGATCGGAAGAGCGTCGTGTAGGGAGGGAGGGAATC

>5 len=105 tot-seq=605715

TGGGGAATATTGCACAATGGGCGAAAGCCTGATGCAGCGACGCCGCGTGAGCGAAGAAGT  
ATTCGGTATGTAAAGCTCTATCAGAAGGGAAGAAAATGACGGTA

>6 len=134 tot-seq=364975

TGGGGAATATTGCACAATGGGCGCAAGCCTGATGCAGCCATGCCGCGTGATGAAGAAGG  
CCTTCGGGTTGTAAAGTACTTTACGCGGGGAGGAAGGGAGTAAAGTTAATACCTTTGCTC  
ATTGACGTTACCCG

>7 len=126 tot-seq=299437

TAGGGAATCTTCGGCAATGGACGGAAGTCTGACCGAGCAACGCCGCGTGAGTGAAGAAGG  
TTTTCGGATCGTAAAGCTCTGTTGTTAGAGAAGAACGTTGGTAGGAGTGGAAAATCTACC  
AAGTGA

>8 len=132 tot-seq=239129

TGAGGAATATTGGTCAATGGACGCAAGTCTGAACCAGCCAAGTAGCGTGCAGGATGACGG

CCCTATGGGTTGTAACTGCTTTTATATGGGGATAAAGTGGGGAACGTGTTCCCTTTTGC  
AGGTACCATATG

>9 len=105 tot-seq=213880

TGGGGAATCTTGACAATGGGCGAAAGCCTGATGCAGCGACGCCGCGTGCGGGATGAAGG  
CCTTCGGGTTGTAAACCGCTTTCAGCAGGGACGAGGCCGCAAGGT

>10 len=134 tot-seq=203233

TGAGGAATATTGGTCAATGGACGAGAGTCTGAACCAGCCAAGTAGCGTGCAGGATGACGG  
CCCTATGGGTTGTAACTGCTTTTGTGGGAATAATCGACATTACGTGTAATGTTTTGC  
ATGTACCATTGAA

>11 len=110 tot-seq=198189

GCGCGCAAATTACCCACTCCCGACCCGGGGAGGTAGTGACGAAAATAACAATACAGGAC  
TCTTTCGAGGCCCTGTAATTGGAATGAGTCCACTTTAAATCCTTTAACGA

>12 len=108 tot-seq=192408

TGGGGAATATTGGACAATGGAGGCAACTCTGATCCAGCAATTCTGTGTGTGAAGAAGG  
TTTTAGGACTGTAAACACTTTTAGTAGGGAAGAAAAAATGACGGTA

>13 len=126 tot-seq=181581

TAGGGAATCTCCACAATGGACGCAAGTCTGATGGAGCAACGCCGCGTGAGTGAAGAAGG  
GTTTCGGCTCGTAAAGCTCTGTTGGTAGTGAAGAAAGATAGAGGTAGTAACTGGCCTTTA  
TTTGAC

>14 len=131 tot-seq=173783

GGAATATTGGTCAATGGGCGAGAGCCTGAACCAGCCAAGTAGCGTGCAGGATGACGGCCC  
TATGGGTTGTAACTGCTTTTATATGGGAATAAAGTGAAGGACGTGTCCTTATTGCATG  
TACCATACGAA

>15 len=139 tot-seq=155421

TAGGGAATCTTCGGCAATGGGGGGAACCCTGACCGAGCAACGCCGCGTGAGTGAAGAAGG  
TTTTCGGATCGTAAAGCTCTGTTGTTAAGGAAGAACGAGTGTGAGAATGGAAAGTTCATG  
CTGTGACGGTACTTAACCA

>16 len=126 tot-seq=123819

TAGGGAATCTTCGCAATGGGCGAAAGCCTGACGGAGCAACGCCGCGTGAGTGATGAAGG

TCTTCGGATCGTAAACTCTGTTATTAGGGAAGAACATATGTGTAAGTAACTGTGCACAT  
CTTGAC

>17 len=146 tot-seq=117396

TAGGGAATCTTCCACAATGGGCGCAAGCCTGATGGAGCAACACCGCGTGAGTGAAGAAGG  
GTTTCGGCTCGTAAAGCTCTGTTGTTGGAGAAGAACGTGCGTGAGAGTAACTGTTACACGC  
AGTGACGGTATCCAACCAGAAAAGTCA

>18 len=161 tot-seq=99268

TAGGGAATCTTCGGCAATGGACGGAAGTCTGACCGAGCAACGCCGCGTGAGTGAAGAAGG  
TTTTCGGATCGTAAAGCTCTGTTGTTAGAGAAGAACGAGTGTGAGAGTGGAAAGTTCATG  
CTGTGACGGTACTTAACCAGAAAGGGACGGCTAACTACGTG

>19 len=229 tot-seq=96689

TGGGGAATATTGCACAATGGGCGCAAGCCTGATGCAGCCATGCCGCGTGATGAAGAAGG  
CCTTCGGGTTGTAAAGTACTTTTCAGCGGGGAGGAAGGCGATAAGGTTAATAACCTTGTCG  
ATTGACGTTACCCGCAGAAGAAGCACCGGCTAACTCCGTGCCAGCAGCCGCGTAATCAC  
AAGATCGGAAGAGCGTCGTGTTGGGGAAAAAAAAGGCCAATGTGTAGTT

>20 len=113 tot-seq=96512

TGGGGAATTTTGCACAATGGGGGAAACCCTGATGCAGCGACGCCGCGTGATTTAGAAGGC  
CTTCGGGTTGTAAAAATCTTTTGTATGGGAAGAAAATGACAGTACCATACGAA

>21 len=201 tot-seq=89208

GTGACTGGAGTTCAGACGTGTGCTCTTCCGATCTCCTACGGGAGGCAGCTTTGAGGAATA  
TTGGTCAATGGGCGAGAGCCTGAACCAGCCAAGTAGCGTGCAGGATGACGGCCCTATGGG  
TTGTAAACTGCTTTTATGTGGGGATAAAGTGCGTGACGTGTCATGCATTGCAGGTACCAC  
ATGAATAAGGACCGGCTAATT

>22 len=201 tot-seq=85270

TGGGGAATATTGCACAATGGGCGCAAGCCTGATGCAGCAACGCCGCGTGAACGATGAAGG  
TCTTCGGATCGTAAAGTTCTGTTGCAGGGGAAGATAATGACGGTACCCTGTGAGGAAGCC  
CCGGCTAACTACGTGGGGGGAGCCGCGTAATACAAAGATCGGAAGAGCGTCGTGTAGGG  
AAAGAGTGGGCCAATGTGTAG

>23 len=138 tot-seq=74266

TGGGGAATCTCCGCAATGGACGAAAGTCTGACGGAGCAACGCCGCGTGAGTGATGACGG  
TCTTCGGATTGTAAAGCTCTGTTAATCGGGACGAATGGTCGGTGTGCAAATAGTGCATGG  
ACATGACGGTACCGGAAT

>24 len=241 tot-seq=66420

TAGGGAATTTTTACAATGGGCGCAAGCCTTATGAAGCAATGCCGCGTGAACGATGAAGG  
TCTTATAGATTGTAAAGTTCTTTTATATGGGAAGAAACGCTAAGATAGGAAATGATTTTA  
GTTTGACTGTACCATTTGAATAAGTATCGGCTAACTATGTGGGGGGAGCCGCGTAATAC  
AAAGATCGGAAGAGCGTCGTGTAGGGAAAGAGTGGGGGAATGTGTAGATCTAGGGAATTT  
T

>25 len=105 tot-seq=65137

TGGGGAATATTGCACAATGGGGGAAACCCTGATGCAGCAACGCCGCGTGAGTGATGAAGG  
TTTTCGGATCGTAAAGCTCTGTCTTTGGGGAAGATAATGACGGTA

>26 len=139 tot-seq=61757

TAGGGAATCTCCACAATGGACGCAAGTCTGATGGAGCAACGCCGCGTGAGTGAAGAAGG  
TCTTCGGATCGTAAACTCTGTTGTTAGAGAAGAACACGAGTGAGAGTAACTGTTCAATC  
GATGACGGTATCTAACCAG

>27 len=134 tot-seq=56733

TGGGGAATATTGCACAATGGGGGAAACCCTGATGCAGCGACGCCGCGTGAGCGAAGAAGG  
ATTTCCGGTATGTAAAGCTCTATCAGCAGGGAAGAAAATGACGGTACCTGACTAAGAAGCC  
CCGGCTAACTACGT

>28 len=128 tot-seq=54439

TGGGGAATCTCCGCAATGGACGAAAGTCTGACGGAGCAACGCCGCGTGAGTGAAGAAGG  
TCTTCGGATTGTAAAGCTCTGTTATACGGGACGAAAAAGACGGATGCCAACAGTATCCGT  
CCGTGACG

>29 len=133 tot-seq=50754

TGAGGAATATTGGTCAATGGGCGGGAGCCTGAACCAGCCAAGTAGCGTGCAGGAAGACGG  
CCCTATGGGTTGTAAACTGCTTTTATGCGGGGATAAAGGAGTCCACGTGTGGGCTTTTGC  
AGGTATCGCATGA

>30 len=201 tot-seq=50450

GTGACTGGAGTTCAGACGTGTGCTCTCCGATCTCCTACGGGAGGCAGCTTTGAGGAATA  
TTGGTCAATGGGCGAGAGCCTGAACCAGCCAAGTCGCGTGAAGGAAGACTGCCCCGAAGG  
GTTGTAAACTTCTTTTGTATGGGATTAAGTCACCTACGTGTAGGTGTTTGCAGTTACCA  
TACGAATAAGCATCGGCTAAC

>31 len=132 tot-seq=44894

TAGGGAATATTCCACAATGAGCGAAAGCTTGATGGAGCGACACAGCGTGCACGATGAAGG  
TCTTCGGATTGTAAAGTGCTGTTATAAGGGAAGAACATTTGCAATAGGAAATGATTGCAG  
ACTGACGGTACC

>32 len=226 tot-seq=40692

TAGGGAATCTTCCACAATGGGCGAAAGCCTGATGGAGCAACGCCGCGTGGGTGAAGAAGG  
TCTTCGGATCGTAAAACCTGTTGTTAGAGAAGAAAGTGCGTGAGAGTAACTGTTACGTT  
TTCGACGGTATCTAACCAGAAAGCCACGGCTAACTACGTGGGGGGAGCCGCGTAATATA  
AAGATCGGAAGAGCGTCGTGTAGGGAAAGAGGGGGGCAATGTGTAG

>33 len=139 tot-seq=40552

TAGGGAATCTTCGGCAATGGACGGAAGTCTGACCGAGCAACGCCGCGTGAGTGAAGAAGG  
TTTTCGGATCGTAAAGCTCTGTTGTAAGAGAAGAACGAGTGTGAGAGTGGAAAGTTCACA  
CTGTGACGGTATCTTACCA

>34 len=137 tot-seq=39512

TGGGGAATCTTCGCAATGGACGAAAGTCTGACGGAGCAACGCCGCGTGAGTGAAGACGG  
TCTTCGGATTGTAAAGCTCTGTTATACGGGACGAAAGGCAAGGTGGTAAATAGCCATCAT  
GAGTGACGGTACCGTAA

>35 len=132 tot-seq=38917

TGGGGAATATTGCACAATGGGGGAAACCCTGATGCAGCGACGCCGCGTGAAGGAAGAAGT  
ATTTCCGGTATGTAACTTCTATCAGCAGGGAAGAAAATGACGGTACCTGACTAAGAAGCC  
CCGGCTAACTAC

>36 len=133 tot-seq=33825

TGAGGAATATTGGTCAATGGGCGAGAGCCTGAACCAGCCAAGTAGCGTGCAGGATGACGG  
CCCTATGGGTTGTAACTGCTTTTACGCGGGGATAAAGTGCGTGACGTGTCTCGCATTGC  
AGGTACCGCGTGA

>37 len=156 tot-seq=33479

TGAGGAATTTTTACAATGGACGAAAGTCTGATGGAGCAATACCACGTGAACGATGAAGG  
TCTTCTGATTGTAAAGTTCTTTATTTAGGAAAAAAGCGTGCTAGGAAATGAGCGCGCC  
TTGATGGTACTAATTGAATAAGTGACAGCTAACTAT

>38 len=144 tot-seq=32265

TGAGGAATATTGGTCAATGGGCGCTAGCCTGAACCAGCCAAGTAGCGTGAAGGATGAAGG  
CTCTATGGGTCGTAAACTTCTTTATATAAGAATAAAGTGCAGTATGTATACTGTTTTGT  
ATGTATTATATGAATAAGGATCGG

>39 len=143 tot-seq=30564

TGAGGAATATTGGTCAATGGACGGAAGTCTGAACCAGCCAAGTAGCGTGCAGGATGACGG  
CCCTATGGGTTGTAAACTGCTTTTATATGGGGATAAAGTTAGGGACGTGTCCCTATTTGC  
AGGTACCATACGAATAAGGACCG

>40 len=135 tot-seq=29699

TGGGGAATATTGCACAATGGGGGAAACCCTGATGCAGCGACGCCGCGTGAGGGAAGAAGG  
CTTTCGAGTCGTAAAGCTCTGTCCTATGAGAAGATAATGACGGTATCATAGGAGGAAGCC  
CTGGCTAAATACGTG

>41 len=125 tot-seq=27475

TGGGGAATATTGCACAATGGGCGCAAGCCTGATGCAGCGACGCCGCGTGAGGGATGGAGG  
CCTTCGGGTTGTAAACCTCTTTTATCGGGGAGCAAGCGAGAGTGAGTTTACCCGTTGAAT  
AAGCA

>42 len=135 tot-seq=25341

TGGGGAATATTGCACAATGGGGGAAACCCTGATGCAGCGACGCCGCGTGAGTGAAGAAGT  
ATTTCCGGTATGTAAAGCTCTATCAGCAGGGAAGAAAATGACGGTACCTGACTAAGAAGCC  
CCGGCTAACTACGTG

>43 len=140 tot-seq=22723

TGGGGAATATTGCACAATGGGCGCAAGCCTGATGCAGCCATGCCGCGTGTGTGAAGAAGG  
CCTTCGGGTTGTAAAGCACTTTCAGCGGGGAGGAAGGCGGTGAGGTTAATAACCTCATCG  
ATTGACGTTACCCGCAGAAG

>44 len=132 tot-seq=22600

TGGGGAATATTGCACAATGGGGGAAACCCTGATGCAGCGACGCCGCGTGAGCGAAGAAGG  
TATTCGTATCGTAAAGTTCTGTCCTATGGGAAGATAATGACAGTACCATAGAAGAAAGCT  
CCGGCTAAATAC

>45 len=146 tot-seq=22453

TAGGGAATCTTCCGCAATGGACGCAAGTCTGACGGAGCAACGCCGCGTGAGTGAAGAAGG  
ATTTGCGTTTCGTAAACTCTGTTGTTAGAGAAGAACAGCGCATAGAGTAACTGTTATGCG  
TGTGACGGTATCTAACCAGAAAGCCA

>46 len=230 tot-seq=19937

TGGGGAATATTGCACAATGGGGGAAACCCTGACGCAGCGACGCCGCGTGCGGGATGAAGG  
CCTTCGGGTTGTAAACCGCTTTTGATTGGGAGCAAGCCTTTTGGGTGAGTGTACCTTTTCG  
AATAAGCGCCGGCTAACTACGTGCCAGCAGCCGCGTAATCAAAGATCGGAAGAGCGTC  
GTGTAGGGAAAGAGTGGGGGAATGTGTAGATCTCGGGGGTTGGGGAATAT

>47 len=147 tot-seq=18199

TGGGGAATATTGCACAATGGGCGCAAGCCTGATGCAGCCATGCCGCGTGTATGAAGAAGG  
CCTTCGGGTTGTAAAGTACTTTTCAGCGGGGAGGAAGGCGTTGAGGTTAATAACCTCAGCA  
ATTGACGTTACCCGAGAAAGAAGCACC

>48 len=150 tot-seq=16176

TGGGGAATATTGGACAATGGGCGAAAGCCTGATCCAGCCATGCCGCGTGTGTGAAGAAGG  
TCTTCGGATTGTAAAGCACTTTAAGTTGGGAGGAAGGGCAGTAAATTAATACTTTGCTGT  
TTTGACGTTACCGACAGAATAAGCACCGGC

>49 len=143 tot-seq=15631

TGGGGAATATTGGACAATGGGGGCAACCCTGATCCAGCCATGCCGCGTGTGTGAAGAAGG  
CCCTCGGGTTGTAAAGCACTTTTCAGTGAGGAAGAACGCCTGGTGGTTAATACCCATCAGG  
AAAGACATCACTCACAGAAGAAG

>50 len=149 tot-seq=14895

TGGGGAATTTTGGACAATGGGCGCAAGCCTGATCCAGCCATGCCGCGTGTCTGAAGAAGG  
CCTTCGGGTTGTAAAGGACTTTTGTGAGGAAGAAAAGGCTGTTGCTAATACCAACAGCT  
GATGACGGTACCTGAAGAATAAGCACCGG

>51 len=158 tot-seq=14739

TGGGGAATATTGGACAATGGGCGAAAGCCTGATCCAGCCATGCCGCGTGTGTGAAGAAGG  
TCTTCGGATTGTAAAGCACTTTAAGTTGGGAGGAAGGGCAGTAGCTTAATACGTTACTGT  
TTTGACGTTACCGACAGAATAAGCACCGGCTAACTCTG

>52 len=151 tot-seq=14585

TAGGGAATCTTCGGCAATGGACGAAAGTCTGACCGAGCAACGCCGCGTGAGTGAAGAAGG  
TTTTCGGATCGTAAACTCTGTTGTTAGAGAAGAACAAGGACGTTAGTAACTGAACGTCC  
CCTGACGGTATCTAACCAGAAAGCCACGGCT

>53 len=135 tot-seq=14530

TGGGGAATATTGCACAATGGGGGAAACCCTGATGCAGCGACGCCGCGTGAAGGAAGAAGG  
TATTCGGATTGTAAACTTCTGTCGTTGAGGAAGATAATGACGGTACTCAACAAGGAAGTG  
ACGGCTAACTACGTG

>54 len=150 tot-seq=14218

TGGGGAATATTGGACAATGGGCGAAAGCCTGATCCAGCCATGCCGCGTGTGTGAAGAAGG  
TCTTCGGATTGTAAAGCACTTTAAGTTGGGAGGAAGGGTTGTAGATTAATACTCTGCAAT  
TTTGACGTTACCGACAGAATAAGCACCGGC

>55 len=118 tot-seq=13655

TGAGGAATATTCCACAATGGGCGAAAGCCTGATGGAGCAATGCCGCGTGCAGGATGAAGG  
CCCTCGGGTCGTAAACTGCTTTTATTAGAGAAGAATATGACGGTAACTAATGAATAAG

>56 len=136 tot-seq=13590

TGGGGAATCTTCCGCAATGGGCGAAAGCCTGACGGAGCAACGCCGCGTGAGTGAAGACGG  
CCTTCGGGTTGTAAACTCTGTGATTCGGGACGAAAGATAAGTAGACGAATAATCTGCAT  
AAGTGACGGTACCGAA

>57 len=137 tot-seq=13472

TGGGGAATCTTCCGCAATGGACGAAAGTCTGACGGAGCAACGCCGCGTGAGTGATGACGG  
CCTTCGGGTTGTAAAGCTCTGTTATTCGGGACGAATGGTCTTTGTGTGAATAATGCAAAG  
ATTTGACGGTACCGAA

>58 len=145 tot-seq=13298

TAGGGAATCTTCCGCAATGGACGCAAGTCTGACGGAGCAACGCCGCGTGAGTGAAGAAGG  
TTTTCGGATCGTAAACTCTGTTGTAAGAGAAGAACAATTGTAGAGTAACTGCTACAGT



CTTGACGGTATCTTACCAGAAAGCC

>59 len=139 tot-seq=12834

TGGGGAATATTGCACAATGGACGGAAGTTTGATGCAGCGACGCCGCGTGGAGGGTGTAGG  
CCTTCGGGTTGTAACTCCTTTTTCTCGTGAAAAAGGCATGCTTTTGGGTGTGTTGATGG  
TAGCGGGGGAAGAAGCGCC

>60 len=145 tot-seq=12468

TGAGGAATATTGGTCAATGGACGAGAGTCTGAACCAGCCAAGTAGCGTGCAGGATGACGG  
CCCTATGGGTTGTAACTGCTTTTATAAGGGAATAAAGTGAGTCTCGTGAGACTTTTTGC  
ATGTACCTTATGAATAAGGACCGGC

>61 len=201 tot-seq=12436

GACTGGAGTTCAGACGTGTGCTCTCCGATCTCCTACGGGAGGCAGCTTTGAGGAATATT  
GGTCAATGGACGAGAGTCTGAACCAGCCAAGTAGCGTGAAGGATGAAGGTTCTATGGATT  
GTAAACTTCTTTTATACGGGAATAAACGAATCCACGTGTGGATTTTTGCATGTACCGTAT  
GAATAAGGATCGGCTAACTCC

>62 len=148 tot-seq=11824

TGGGGAATCTTCCGCAATGGACGAAAGTCTGACGGAGCAACGCCGCGTGAGTGAAGACGG  
CCTTCGGGTTGTAAAGCTCTGTTATTCGGGACGAAAGGCCATATGTGAATAATATATGGA  
AATGACGGTACCGAAAAAGCAAGCCACG

>63 len=127 tot-seq=11734

TGGGGAATATTGCGCAATGGGGGAAACCCTGACGCAGCGACGCCGCGTGCGGGATGAAGG  
CCTTCGGGTTGTAAACCGCTTTCAGCAGGGAAGACATCGACGGTACCTGCAGAAGAAGCC  
CCGGCTA

>64 len=150 tot-seq=11164

TGGGGAATTTTGGACAATGGGCGCAAGCCTGATCCAGCAATGCCGCGTGAGTGAAGAAGG  
CCCTCGGGTTGTAAAGCTCTTTTGTGAGGGAAGAAAAGGTGATCTCTAATACAGGTCCT  
CATGACGGTACCTGAAGAATAAGCACCGGC

>65 len=142 tot-seq=10869

TGGGGAATATTGCACAATGGGCGCAAGCCTGATGCAGCGACGCCGCGTGAGGGATGACGG  
CCTTCGGGTTGTAAACCTCTTTTGTAGGGAGCAAGCCTTCGGGTGAGTGTACCTTTTCA

ATAAGCACCGGCTAACTACGTG

>66 len=146 tot-seq=10816

TAGGGAATCTTCCACAATGGACGAAAGTCTGATGGAGCAACGCCGCGTGAATGAAGAAGG  
CCTTCGGGTCGTAAAATTCTGTTGTCAGAGAAGAACGTGCGTGAGAGTAACTGTTACAGT  
ATTGACGGTATCTGACCAGAAAGCCA

>67 len=135 tot-seq=10781

TGGGGAATATTGCACAATGGGCGAAAGCCTGATGCAGCGACGCCGCGTGAGGGATGACGG  
CCTTCGGGTTGTAAACCTCTTTCAGCAGGGACGAAGCGCAAGTGACGGTACCTGCAGAAG  
AAGCACCGGCTAACT

>68 len=125 tot-seq=10264

TGGGGAATTTTGGACAATGGGCGCAAGCCTGATCCAGCAATGCCGCGTGTGTGAAGAAGG  
CCTTCGGGTTGTAAAGCACTTTTGTCCGAAAGAAAACGCCGTGGTTAATACCCGTGGCG  
GATGA

>69 len=146 tot-seq=9792

TGGGGAATATTGCGCAATGGGGGGAACCCTGACGCAGCCATGCCGCGTGAATGAAGAAGG  
CCTTAGGGTTGTAAAGTTCTTTCGGTATTGAGGAAGGTTGATGTGTTAATAGCACATCAA  
ATTGACGTTAAATACAGAAGAAGCAC

>70 len=146 tot-seq=9685

TGGGGAATATTGCACAATGGGGGAAACCCTGATGCAGCGACGCCGCGTGAGTGAAGAAGT  
ATTCGGTATGTAAAGCTCTATCAGCAGGGAAGAAATAGCGACCTTTGGGTCGCCAGACG  
GTACCTGATTAAGAAGCCCCGGCTAA

>71 len=146 tot-seq=9252

TGGGGAATTTTGGACAATGGGCGCAAGCCTGATCCAGCAATGCCGCGTGTGTGAAGAAGG  
CCTTCGGGTTGTAAAGCACTTTTGTCCGAAAGAAAACCTCCTGGTTAATACCTGGGGGG  
GATGACGGTACCGGAAGAATAAGCAC

>72 len=135 tot-seq=8525

TGGGGAATATTGCACAATGGAGGGAACTCTGATGCAGCGACGCCGCGTGAACGAAGAAGG  
CTTTCGAGTCGTAAAGTTCTTTTATATGGGAAGATAATGACGGTACCATAAGAAAAAGCC  
CCGGCTAACTACGTG

>73 len=139 tot-seq=8515

TGGGGAATTTCCGCAATGGGCGAAAGCCTGACGGAGCAATGCCGCGTGAGGTGGAAGG  
CCTACGGGTCGTCAACTTCTTTTCTCGGAGAAGAAACAATGACGGTATCTGAGGAATAAG  
CATCGGCTAACTCTGTGGG

>74 len=229 tot-seq=8497

TGGGGAATATTGGGCAATGGGCGAAAGCCTGACCCAGCAACGCCGCGTGAGTGATGAAGG  
CCTTCGGGTTGTAAACTCTTTGGACAGGGACGAAGAAAGTGACGGTACCTGTAGAACA  
GCCACGGCTAACTACGTGGGGGGAGCCGGGTAATCGCAAGATCGGAAGAGCGTCGTGTAG  
GGAAAGAGTGTCCAATGGGGAATATTGGGCAATGGGCGAAAGCCTGAC

>75 len=149 tot-seq=8397

TAGGGAATCTTCCGCAATGGACGAAAGTCTGACGGAGCAACGCCGCGTGAGTGAAGAAGG  
ATTCGGTTCGTAAACTCTGTTGTTAGGGAAGAAAAATGTATAGTAACTATATACAAA  
AGAGACGGTACCTAACCAGAAAGCCACGG

>76 len=140 tot-seq=8239

TGAGGAATATTGGTCAATGGGCGTAAGCCTGAACCAGCCAAGTCGCGTGAGGGATGAAGG  
TTCTATGGATCGTAAACCTCTTTTATAAGGGAATAAAGTGCGGGACGTGTCCTGTTTTGT  
ATGTACCTTATGAATAAGGA

>77 len=140 tot-seq=7986

TAGGGAATCTTCCACAATGGGCGCAAGCCTGATGGAGCAACACCGCGTGAGTGAAGAAGG  
GTTTCGGCTCGTAAAGCTCTGTTGTTGGAGAAGAACGTATCTGAGAGTAACTGTTCAAGT  
AGTGACGGTATCCAACCAGA

>78 len=148 tot-seq=7917

TGGGGAATATTGGACAATGGGCGCAAGCCTGATCCAGCCATACCGCGTGGGTGAAGAAGG  
CCTTCGGGTTGTAAAGCCCTTTTGTGGAAAGAAATCCAGCCGGCTAATACCTGGTTGG  
GATGACGGTACCCAAAGAATAAGCACCG

>79 len=182 tot-seq=7911

TGGGGAATATTGCACAATGGGGGAAACCCTGATGCAGCGACGCCGCGTGAGCGAAGAAGG  
CCTTCGGGTCGTAAAGCTCTTTTATATGGGAAGATAATGACGGTACCATAAGAAAAAGCC  
CCGGCTAACTACGTGGGGGGAGCCGCGGTAATACAAGATCGGAAGAGCGTCGTGTTGGGG

AA

>80 len=121 tot-seq=7652

TAGGGAATATTGCACAATGGAGGAACTCTGATGCAGCCATGCCGCGTGTGTGAAGAAGG  
CCTTCGGGTTGTAAAGCACTTTCGGAGGGGAGGAAAAAATGACGTTACCCTCAGAAGAA  
G

>81 len=144 tot-seq=7571

TGAGGAATATTGGTCAATGGGCGCTAGCCTGAACCAGCCAAGTAGCGTGCAGGATGACGG  
CCCTATGGGTTGTAAACTGCTTTTATGCGGGGATAAAGTCACCCACGTGTGGGTGTTTGC  
AGGTACCGCATGAATAAGGACCGG

>82 len=153 tot-seq=7245

TGGGGAATTTTGGACAATGGGGGCAACCCTGATCCAGCCATGCCGCGTGCAGGATGAAGG  
TCTTCGGATTGTAAACTGCTTTTGTGAGGGAAGAAAAGGTCTGTGTTAATACCATAGACT  
GCTGACGGTACCTGAAGAATAAGCACCGGCTAA

>83 len=147 tot-seq=6950

TGGGGAATCTCCGCAATGGACGAAAGTCTGACGGAGCAACGCCGCGTGAACGATGACGG  
CCTTCGGGTTGTAAAGTTCTGTTATATGGGACGAACAGGGCATCGGTTAATACCCGGTGT  
CTTTGACGGTACCGTAAGAGAAAGCCA

>84 len=134 tot-seq=6760

TGGGGAATATTGGACAATGGGCGCAAGCCTGATCCAGCCATGCCGCGTGAGTGATGAAGG  
CCTTAGGGTTGTAAAGCTCTTTCACCGGTGAAGATAATGACGGTAGCCGGAGAAGAAGCC  
CCGGCTAACTTCGT

>85 len=139 tot-seq=6715

TGGGGAATATTGCACAATGGGCGGAAGCCTGATGCAGCAACGCCGCGTGCGGGATGACGG  
CCTTCGGGTTGTAAACCGCTTTCGCTGTGACGAAGCGTGAGTGACGGTAATGGGTAAAG  
AAGCACCGGCTAACTACGT

>86 len=146 tot-seq=6693

TAGGGAATCTCCACAATGGACGCAAGTCTGATGGAGCAACGCCGCGTGAGTGAAGAAGG  
GTTTCGGCTCGTAAAGCTCTGTTGTTAAAGAAGAACGTGGGTAAGAGTAACTGTTTACCC  
AGTGACGGTATTTAACCAGAAAGCCA

>87 len=144 tot-seq=6644

TGGGGAATCTCCGCAATGGGCGCAAGCCTGACGGAGCAATGCCGCGTGAGTGAAGAAGG  
CCTTCGGGTTGTAAACTCTGTCTCATCCAAGAGAAGGGAAGGTAGTAACTGACCTTC  
CAGGACGGTAGATGAGGAGGAAGC

>88 len=151 tot-seq=6502

TAGGGAATTTTCGTCAATGGGGGAAACCCTGAACGAGCAATGCCGCGTGAGTGAAGAAGG  
TCTTCGGATCGTAAAGCTCTGTTGTAAGTGAAGAACGGCTCATAGAGGAAATGCTATGGG  
AGTGACGGTAGCTTACCAGAAAGCCACGGCT

>89 len=216 tot-seq=6197

TAGGGAATTTTCGTCAATGGGCGCAAGCCTGAACGAGCGATGCCGCGTGAGTGAAGAAGG  
CCTTCGGGTCGTAAAGCTCTGTTGCGGGGGAAAAAAGGCAGCATCAGGAAATGGGTGCTG  
ACTGATGGTGCCCCGCCAGAAAGTCACGGCTAACTACGTGGGGGGAGCCGCGTAATATC  
GAGATCGGAAGAGCGTCGTGTAGGGGAAGAGTGTGC

>90 len=211 tot-seq=6160

TGAGGAATATTGGTCAATGGACGAGAGTCTGAACCAGCCAAGTAGCGTGAAGGATGACTG  
CCCTATGGGTTGTAAACTTCTTTTATATGGGAATAAAGTTTTCCACGTGTGGAATTTTGT  
ATGTACCATATGAATAAGGATCGGCTAACTCCGTGGGGGGAGCCGCGTAATAAGAAGAT  
CGGAAGAGCGTCGTGTAGGGAAAGAGGGGGC

>91 len=141 tot-seq=5976

TGAGGAATATTGGTCAATGGGAGAGATCCTGAACCAGCCAAGCCGCGTGAGGGAAGACGG  
CCCTATGGGTTGTAACTCTTTTGTCTGGAGAACAAAACCCGGGACGTGTCCCGGACTGC  
GTGTATCCGAAGAAAAAGCAT

>92 len=126 tot-seq=5971

TGGGGAATATTGCACAATGGAGGGAECTCTGATGCAGCGACGCCGCGTGAGTGAAGAAGT  
ATTCGGTATGTAAAGCTCTATCAGCAGGGAAGAAGATGACGGTACCTGAATAAGAAGCC  
CCGGCT

>93 len=134 tot-seq=5954

TGGGGAATATTGGACAATGGACCAAGAGTCTGATCCAGCAATTCTGTGTGCACGATGAAG  
TTTTTCGGAATGTAAAGTGCTTTCAGTTGGGAAGAAAAAATGACGGTACCAACAGAAGA

AGTGACGGCTAAAT

>94 len=147 tot-seq=5948

TGAGGAATATTGGTCAATGGACGAGAGTCTGAACCAAGTAGCGTGAAGGATGACTG  
CCCTATGGGTTGTAAACTTCTTTTATACGGGAATAAAGTGAGGCACGTGTGCCTTTTTGT  
ATGTACCGTATGAATAAGGATCGGCTA

>95 len=132 tot-seq=5898

TGGGGAATCTCCGCAATGGACGAAAGTCTGACGGAGCAACGCCGCGTGAACGATGACGG  
CCTTCGGGTTGTAAAGTTCTGTTATACGGGACGAATGGTACGACGGTCAATACCCGTCGT  
AAGTGACGGTAC

>96 len=144 tot-seq=5697

TAGGGAATCTTCGGCAATGGACGAAAGTCTGACCGAGCAACGCCGCGTGAGTGAAGAAGG  
TTTTCGGATCGTAAACTCTGTTGGTAGAGAAGAACGTTGGTGAGAGTGGAAGCTCATC  
AAGTGACGGTAACTACCCAGAAAG

>97 len=156 tot-seq=5611

TGGGGAATCTCCGCAATGGACGAAAGTCTGACGGAGCAACGCCGCGTGAACGATGACGG  
CCTTCGGGTTGTAAAGTTCTGTTATACGGGACGAATGGCGCAACGGTCAATACCCGTTGC  
GAGTGACGGTACCGTAAGAGAAAGCCACGGCTAACT

>98 len=183 tot-seq=5462

TGGGGAATATTGCACAATGGGGGAAACCCTGATGCAGCGACGCCGCGTGGAGGAAGAAGG  
TCTTCGGATTGTAAACTCCTGTTGTTGAGGAAGATAATGACGGTACTCAACAAGGAAGTG  
ACGGCTAACTACGTGGGGGGAGCCGCGTAATACAAAGATCGGAAGAGCGTCGTGTTGGG  
GAA

>99 len=129 tot-seq=5293

TCGAGAATCATTACAATGGGGGAAACCCTGATGGTGCGACGCCGCGTGGGGGAATGAAG  
GTCTTCGGATTGTAAACCCTGTCATGTGGGAGCAAATTA AAAAGATAGTACCACAAGAG  
GAAGAGACG

>100 len=134 tot-seq=5227

TAGGGAATCTTCGGCAATGGGGGCAACCCTGACCGAGCAACGCCGCGTGAGTGAAGAAGG  
TTTTCGGATCGTAAAGCTCTGTTGTAAGTCAAGAACGAGTGTGAGAGTGGAAGTTCACA

CTGTGACGGTAGCT

>101 len=144 tot-seq=5202

TGGGGAATATTGCACAATGGGCGCAAGCCTGATGCAGCGACGCCGCGTGAGGGATGGAGG  
CCTTCGGGTTGTAAACCTCTTTTGTAGGGAGCAAGGCACTTTGTGTTGAGTGTACCTTT  
CGAATAAGCACCCGGCTAACTACGT

>102 len=140 tot-seq=5042

TGAGGAATATTGGTCAATGGGCGATGGCCTGAACCAGCCAAGTAGCGTGAAGGATGACTG  
CCCTATGGGTTGTAAACTTCTTTTATAAAGGAATAAAGTCGGGTATGCATACCCGTTTGC  
ATGTACTTTATGAATAAGGA

>103 len=136 tot-seq=5018

TGGGGAATATTGCACAATGGACGAAAGTTTGTATGCAGCGACGCCGCGTGGAGGGTGTAGG  
CCTTCGGGTTGTGAACTCCTTTTTCTCGCGAAAAGGCACAGTTTTGGCTGTGTTGATGG  
TAGTGGGGGAAGAAGC

>104 len=134 tot-seq=4916

TGGGGGATATTGCACAATGGGGGAAACCCTGATGCAGCGACGCCGCGTGGAGGAAGAAGG  
TTTTCGGATTGTAAACTCCTGTCTGTTAGGGACGATAATGACGGTACCTAACAAGAAAGCA  
CCGGCTAACTACGT

>105 len=129 tot-seq=4705

TGGGGAATATTGCACAATGGGGGAAACCCTGATGCAGCGACGCCGCGTGAGCGATGAAGG  
CTTTCGAGTCGTAAAGCTCTGTCCTATGGGAAGATAATGACGGTACCATAGAAGAAAGCC  
CCGGCTAAT

>106 len=158 tot-seq=4699

TGGGGAATCTCCGCAATGGACGAAAGTCTGACGGAGCAACGCCGCGTGAGTGATGACGG  
CCTTCGGGTTGTAAAGCTCTGTTAATCGGGACGAAAGGCCTTCTTGCGAATAGTTAGAAG  
GATTGACGGTACCGGAATAGAAAGCCACGGCTAACTAC

>107 len=153 tot-seq=4565

TGGGGAATTTTGGACAATGGGGGCAACCCTGATCCAGCCATGCCGCGTGTCTGAAGAAGG  
CCTTCGGGTTGTAAAGGACTTTTTGTCCGGGAAGAAAAGCGCGATGTTAATACCATTGCGT  
GCTGACGGTACCGGAAGAATAAGCACCCGGCTAA

>108 len=157 tot-seq=4466

TAGGGAATCTTCGGCAATGGGCGAAAGCCTGACCGAGCAACGCCGCGTGAATGAAGAAGG  
CCTTCGGGTTGTAAAATTCTGTTATAAGGGAAGAAAGGTGATAGGAGGAAATGACTATCA  
ATTGACGGTACCTTATGAGAAAGCCACGGCTAACTAC

>109 len=188 tot-seq=4450

TGGGGAATCTTGACAATGGGCGAAAGCCCGATCCAGCAATATCGCGTGAGTGAAGAAGG  
GCAATGCCGCTTGTAAGCTCTTCGTCGAGTGCGCGATCATGACAGGACTCGAGGAAGA  
AGCCCCGGCTAACTCCGTGGGGGGAGCCGCGGTAATAGAAGAAAGGGAGAGCGCGTGTAG  
GGAAAGAG

>110 len=136 tot-seq=4417

TGGGGGATATTGGACAATGGGGGAAACCCTGATCCAGCGACGCCGCGTGAGTGAAGAAGT  
ATTCGGTATGTAAAGCTCTGTCAGCAGGGAAGAAAGAAATGACGGTACCTGACCAAGAA  
GCCCCGGCTAACTACG

>111 len=130 tot-seq=4362

TGGGGAATATTGGGCAATGGGCGAAAGCCTGACCCAGCAACGCCGCGTGAAGTATGAAGG  
CCTTCGGGTTGTAAACTTCTTTGATCAGGGAAGAAACAAATGACGGTACCTGAAAAACAA  
GCCACGGCTA

>112 len=148 tot-seq=4082

TAGGGAATCTTCGGCAATGGACGAAAGTCTGACCGAGCAACGCCGCGTGAGTGAAGAAGG  
TTTTCGGATCGTAAACTCTGTTGTTAGAGAAGAACAAGGATGAGAGTAACTGTTTCATCC  
CTTGACGGTATCTAACCAGAAAGCCACG

>113 len=149 tot-seq=3970

TGGGGAATCTTCGCAATGGACGAAAGTCTGACGGAGCAACGCCGCGTGAGTGATGAAGG  
TCTTCGGATTGTAAACTCTGTTGTCAGGGACGAATGTACTGATCTATAATACATTTTCGG  
TATTGACGGTACCTGACGAGGAAGCCACG

>114 len=135 tot-seq=3804

TGGGGAATATTGCACAATGGGGGAAACCCTGATGCAGCGACGCCGCGTGAGCGATGAAGT  
ATTCGGTATGTAAAGCTCTATCAGCAGGGAAGATAATGACGGTACCTGACTAAGAAGCT  
CCGGCTAAATACGTG



>115 len=160 tot-seq=3793

TGGGGAATTTTGGACAATGGGCGCAAGCCTGATCCAGCCATGCCGCGTGTCTGAAGAAGG  
CCTTCGGGTTGTAAAGGACTTTTGTCTAGGGAAGAAAAGGGCGGGGTTAATACCCCTGTCT  
GATGACGGTACCTGAAGAATAAGCACCGGCTAACTACGTG

>116 len=155 tot-seq=3753

TGAGGAATATTGGTCAATGGCCGGGAGGCTGAACCAGCCAAGTCGCGTGAGGGAAGACGG  
TCCTATGGATTGTAAACCTCTTTTGTCTAGGGAGCAAAAAGTCCACGTGTGGCAGGATGA  
GAGTACCTGAAGAAAAGCATCGGCTAACTCCGTG

>117 len=137 tot-seq=3730

TGGGGAATATTGGGCAATGGGCGCAAGCCTGACCCAGCAACGCCGCGTGAAGGAAGAAGG  
CTTTCGGGTTGTAAACTTCTTTTGTCTAGGGACGAAGCAAGTGACGGTACCTGACGAATAA  
GCCACGGCTAACTACGT

>118 len=133 tot-seq=3707

TGGGGGATATTGCACAATGGAGGCAACTCTGATGCAGCAACGCCGCGTGAGTGAAGAAGG  
CTTTCGAGTCGTAAACTCTGTCTATGGGAAGAAAAAATGACGGTACCATACAAGAAA  
GCCCCGGCTAACT

>119 len=153 tot-seq=3667

TGAGGAATATTGGACAATGGGCGGAAGCCTGATCCAGCCATGCCGCGTGAAGGAAGGAGG  
TCCTATGGATCGTAAACTTCTTTTGTCTAGAGCAATAAAGTGTACGAGTACACTGATGA  
GAGTATGCGTCGAATAAGCATCGGCTAACTCCG

>120 len=157 tot-seq=3627

TAGGGAATTTTCGGCAATGGGGGAAACCCTGACCGAGCAACGCCGCGTGAAGGAAGAAGT  
AATTCGTTATGTAAACTTCTGTCTAGAGGAAGAACGGTGGATATAGGGAATGATATCCA  
AGTGACGGTACTCTATAAGAAAGCCACGGCTAACTAC

>121 len=135 tot-seq=3613

TGGGGAATATTGCACAATGGGGGAAACCCTGATGCAGCGACGCCGCGTGAGCGAAGAAGT  
ATTCGGTATGTAAAGCTCTATCAGCAGGGAAGAAGAAATGACGGTACCTGACTAAGAAG  
CACCGGCTAAATACG

>122 len=128 tot-seq=3607

TGGGGAATATTGCACAATGGGGGAAACCCTGATGCAGCAACGCCGCGTGAGTGAAGAAGG  
TTTTCGGATTGTAAAGCTCTGTTAGCAGGGAAGAGGAAGGACGGTACCTGCAGAGGAAGC  
CACGGCTA

>123 len=142 tot-seq=3465

TGAGGAATATTGGTCAATGGGCGCGAGCCTGAACCAGCCAAGTCGCGTGAGGGACGACGG  
TCCTACGGATTGTAAACCTCTTTAGGCGGGGAGTAATGTGCTCTACGAGTAGAGTAGTGA  
GAGTACCCGCAGAATAAGCATC

>124 len=153 tot-seq=3457

TGAGGAATATTGGTCAATGGGCGGAGAGCCTGAACCAGCCAAGTAGCGTGAAGGATGAAGG  
CTCTATGGGTCGTAAACTTCTTTTATATGGGAATAAAGTTTTCCACGTGTGGAATTTTGT  
ATGTACCATATGAATAAGGATCGGCTAACTCCG

>125 len=139 tot-seq=3434

TGGGGAATATTGCACAATGGGGGAAACCCTGATGCAGCGACGCCGCGTGGGGGATGACGG  
CCTTCGGGTTGTAAACCTCTTTTCAGTAGGGAAGAAGCCTTCGGGTGACGGTACCTGCAGA  
AGAAGTACCGGCTAACTAC

>126 len=149 tot-seq=3419

TGAGGAATATTGGTCAATGGGCGCGAGCCTGAACCAGCCAAGTCGCGTGAGGGAAGACGG  
TCCTATGGATTGTAAACCTCTTTTGCCGGGGAGCAAGCTGTGTCACGTGTGACACAGCTG  
AGAGTACCCGGAGAAAAAGCATCGGCTAA

>127 len=150 tot-seq=3409

TGAGGAATATTGGTCAATGGACGCAAGTCTGAACCAGCCATGCCGCGTGCAGGAAGACGG  
CTCTATGAGTTGTAAACTGCTTTTGTACGAGGGTAAACGCATCTACGTGTAGGTGCCTGA  
AAGTATCGTACGAATAAGGATCGGCTAACT

>128 len=133 tot-seq=3406

TGGGGAATATTGCACAATGGGCGAAAGCCTGATGCAGCAACGCCGCGTGAGCGATGAAGG  
CCTTCGGGTCGTAAAGCTCTGTCTCAAGGAAGATAATGACGGTACTTGAGGAGGAAGCC  
CCGGCTAACTACG

>129 len=152 tot-seq=3331

TGGGGAATATTGCACAATGGGCGCAAGCCTGATGCAGCCATGCCGCGTGTATGAAGAAGG

CCTTCGGGTTGTAAAGTACTTTTCAGCGGGGAGGAAGGGAGTGAGGTTAATAACCTTATTC  
ATTGACGTTACCCGCAGAAGAAGCACCGGCTA

>130 len=158 tot-seq=3312

TAGGGAATCTTCCACAATGGGCGCAAGCCTGATGGAGCAACACCGCGTGAGTGAAGAAGG  
GTTTCGGCTCGTAAACTCTGTTGTTGAAGAAGAACGTGCGTGAGAGTAACTATTCACGC  
AGTGACGGTATTCAACCAGAAAGTCACGGCTAACTACG

>131 len=160 tot-seq=3292

TGGGGAATATTGGACAATGGGCGAAAGCCTGATCCAGCCATGCCGCGTGTGTGAAGAAGG  
TCTTCGGATTGTAAAGCACTTTAAGTTGGGAGGAAGGGCAGTTACCTAATACGTAATTGT  
TTTGACGTTACCGACAGAATAAGCACCGGCTAACTCTGTG

>132 len=148 tot-seq=3281

TGGGGAATCTTCGCAATGGGCGCAAGCCTGACGGAGCAACGCCGCGTGAGTGAAGAAGG  
GTTTCGACTCGTAAAGCTCTGTTGTCGGGGACGAACGTGGAGACGGCGAATAGCCGTTTC  
CAATGACGGTACCTGACGAGGAAGCCAC

>133 len=150 tot-seq=3122

TGAGGAATATTGGTCAATGGGCGAGAGCCTGAACCAGCCAAGTCGCGTGAAGGAAGACTG  
CCCGCAAGGGTTGTAAACTTCTTTTGTATGGGATTAAGTCGTCTACGTGTAGACGTTTG  
CAGTTACTATACGAATAAGCATCGGCTAAC

>134 len=159 tot-seq=3084

TGGGGAATTTTGGACAATGGGGGAAACCCTGATCCAGCCATCCCGCGTGTGCGATGAAGG  
CCTTCGGGTTGTAAAGCACTTTTGGCAGGAAAGAAACGTCGTGGGTTAATACCCCGCGAA  
ACTGACGGTACCTGCAGAATAAGCACCGGCTAACTACGT

>135 len=151 tot-seq=3011

TGGGGAATATTGCACAATGGGGGAAACCCTGATGCAGCGACGCCGCGTGAGTGAAGAAGT  
ATTCGGTACGTAAAGCTCTATCAGCAGGGAAGAAAGAAAGTCCTTTGGACTTTGGACGG  
TACCTGACCAAGAAGCCCCGGCTAACTACGT

>136 len=136 tot-seq=2929

GCATGCAAATTACCCACTCCCGACCCGAAGAGGTAGTGACGAAAAATAACAATACAGGAC  
TCTTTGAGGTCCTGTAATTGGAATGAGTCCACTTTAAATCCTTTAATGAGGATCCATTG

GAGGGCAAATCTAGTG

>137 len=140 tot-seq=2767

TGGGGAATATTGCACAATGGGCGCAAGCCTGATGCAGCGACGCCCGTGGGGGATGACGG  
CCTTCGGGTTGTAAACTCCTTCGCCAGGGACGAAGCGTTTTGTGACGGTACCTGGATAA  
GAAGCACCGGCTAACTACGT

>138 len=145 tot-seq=2724

TGAGGAATATTGGTCAATGGTCGGGAGACTGAACCAGCCAAGCCCGTGTGAGGGAGGAAGG  
TACAGAGTATCGTAAACCTCTTTTGTGAGGGAACAAAGGCGGGGACGTGTCCCCGGATGA  
GTGTACCTGAAGAAAAAGCATCGGC

>139 len=134 tot-seq=2696

TGGGGAATATTGCACAATGGGCGGAAGCCTGATGCAGCGACGCCCGTGTGAGGGATGACGG  
CCTTCGGGTTGTAAACCTCTTTCAGCAGGGAAGAAGCCACAAGTGACGGTACCTGCAGAA  
GAAGCGCCGGCTAA

>140 len=135 tot-seq=2633

TGGGGAATCTTGCACAATGGGGGAAACCCTGATGCAGCGACGCCCGTGTGAGCGATGAAGG  
TTTTCGAATCGTAAAGCTCTGTCTATGGGAAGATAATGACGGTACCATAGGAGGAAGCC  
CCGGCTAACTACGTG

>141 len=152 tot-seq=2610

TGGGGAATTTTGGACAATGGGCGCAAGCCTGATCCAGCAATGCCCGTGTGTGAAGAAGG  
CCTTCGGGTTGTAAAGCACTTTTGTGCGGAAAGAAAACCTCTGCCCTAATACGGTGGGGG  
GATGACGGTACCGGAAGAATAAGCACCGGCTA

>142 len=133 tot-seq=2581

TGGGGAATATTGCACAATGGGGGAAACCCTGATGCAGCAACGCCCGTGTGAGTGTGACGG  
CCTTCGGGTTGTAAAGCTCTGTCTTCAGGGACGATAATGACGGTACCTGAGGAGGAAGCC  
ACGGCTAACTACG

>143 len=160 tot-seq=2579

TAGGGAATCTTCCACAATGGGCGCAAGCCTGATGGAGCAACACCGCGTGTGAGTGAAGAAGG  
GTTTCGGCTCGTAAAGCTCTGTTGTTAAAGAAGAACACGTATGAGAGTAACTGTTTCATAC  
GTTGACGGTATTTAACAGAAAGTCACGGCTAACTACGTG

>144 len=137 tot-seq=2579

TGGGGAATATTGGGCAATGGGCGCAAGCCTGACCCAGCAACGCCGCGTGAAGGAAGAAGG  
CTTTCGGGTTGTAACTTCTTTAAGAGGGAAGAGCAGAAGACGGTACCTCTTGAATAAG  
CCACGGCTAACTACGTG

>145 len=176 tot-seq=2544

GTATCTCAAGCAGGGAGTCTGAAGCCAAAGAGGGAGAGCTTCTGGAAGTGGGGCTTTACTA  
GGGCCCTCAGGCATGCTCCCTCAGGGGAGGTTGTGCATTGATTGGTTTAGAGGAAACACG  
TGCAAAGGGGGACGTTATTGACAGGACTCTGGTGTGATCATTAGGTTCAATCATG

>146 len=136 tot-seq=2543

GCATGCAAATTACCCACTCCCGACCCAAGGAGGTAGTGATGAAACATACCAATACAGGAC  
TCTTTCGAGGTCCTGTAATTGGAATGAGTCCACTTTAAATCCTTTAACGAAGATCCATTG  
GAGGGCAAGTCTAGTG

>147 len=135 tot-seq=2542

TGGGGAATATTGCACAATGGAGGGAACTCTGATGCAGCGACGCCGCGTGAGTGAAGAAGT  
ATTTCCGGTATGTAAAGCTCTATCAGTAGGGAAGATAATGACGGTACCTACATAAGAAGCC  
CCGGCTAAATACGTG

>148 len=134 tot-seq=2484

TAGGGAATATTGCACAATGGGGGAAACCCTGATGCAGCGACGCCGCGTGAAGGATGAAGT  
ATTTCCGGTATGTAACTTCTATCAGCAAGGAAGAAAATGACGGTACTTGACTAAGAAGCC  
CCGGCTAAATACGT

>149 len=158 tot-seq=2469

TGGGGAATATTGCGCAATGGGGGAAACCCTGACGCAGCCATGCCGCGTGAATGAAGAAGG  
CCTTCGGGTTGTAAAGTTCTTTCGGTAATGAGGAAGGGATGTTGTTAAATAGATAGCATC  
ATTGACGTTAATTACAGAAGAAGCACCGGCTAACTCCG

>150 len=136 tot-seq=2416

TGGGGAATATTGCGCAATGGGGGAAACCCTGACGCAGCGACGCCGCGTGCGGGATGAAGG  
CCTTCGGGTTGTAAACCGCTTTCAGCAGGGACGAGGCCGCAAGGTGACGGTACCTGCAGA  
AGAAGCCCCGGCTAAC

>151 len=160 tot-seq=2410

TAGGGAATTTTCGGCAATGGGGGAAACCTGACCGAGCAACGCCGCGTGAAGGAAGAAGG  
TTTTCGGATTGTAACTTCTGTTATAAAGGAAGAACGGCGGCTACAGGAAATGGTAGCCG  
AGTGACGGTACTTTATTAGAAAGCCACGGCTAACTACGTG

>152 len=161 tot-seq=2392

TGGGGAATCTTCGCAATGGACGAAAGTCTGACGGAGCAACGCCGCGTGAGTGAAGACGG  
CCTTCGGGTTGTAAAGCTCTGTGATCCGGGACGAAAGAGCCTTGGGTAAATAGCCTAAGG  
AAGTGACGGTACCGGAAAAGCAAGCCACGGCTAACTACGTG

>153 len=147 tot-seq=2329

TGAGGAATATTGGTCAATGGGCGAGAGCCTGAACCAGCCAAGTAGCGTGCAGGAAGACGG  
CCCTATGGGTTGTAACTGCTTTTATGCGGGGATAAAGTGCGCGACGTGTCGTGCATTGT  
AGGTACCGCATGAATAAGGACCGGCTA

>154 len=156 tot-seq=2241

TGGGGAATATTGGACAATGGGCGAAAGCCTGATCCAGCCATGCCGCGTGTGTGAAGAAGG  
CCTTTTGGTTGTAAAGCACTTTAAGTGGGGAGGAAAAGCTTATGGTTAATACCCATAAGC  
CCTGACGTTACCCACAGAATAAGCACCGGCTAACTC

>155 len=144 tot-seq=2236

TGAGGAATATTGGTCAATGGCCGAGAGGCTGAACCAGCCAAGTCGCGTGAGGGAAGACGG  
CCCTACGGGTTGTAAACCTCTTTTGTGAGGGAGCAAAGAACGTCACGTGTGGCGTCTCGA  
GAGTACCTGAAGAAAAAGCATCGG

>156 len=134 tot-seq=2219

TGGGGAATATTGCACAATGGAGGAAACTCTGATGCAGCGACGCCGCGTGAGTGAAGAAGT  
AGTTCGCTATGTAAAGCTCTATCAGCAGGGAAGATAGTGACGGTACCTGACTAAGAAGCT  
CCGGCTAAATACGT

>157 len=214 tot-seq=2218

TGGGGAATTTTGGACAATGGGCGAAAGCCTGATCCAGCAATGCCGCGTGCAGGATGAAGG  
CCTTCGGGTTGTAACTGCTTTTGTACGGAACGAAAAAGCTTCTCCTAATACGAGAGGCC  
CATGACGGTACCGTAAGAATAAGCACCGGCTAACTACGTGGGGGGAGCCGCGGTATCTGC  
AGATCGGAAGGGGGTCGTGTAGGGAAAGAGGGGG

>158 len=159 tot-seq=2165

TGGGGAATTTTGGACAATGGGCGAAAGCCTGATCCAGCAATGCCGCGTGTGTGAAGAAGG  
CCTTCGGGTTGTAAAGCACTTTTGTCCGGAAAGAAATCCTTGGCTCTAATACAGTCGGGG  
GATGACGGTACCGGAAGAATAAGCACCGGCTAACTACGT

>159 len=146 tot-seq=2119

TGAGGAATATTGGTCAATGGGCGAGAGCCTGAACCAGCCAAGTCGCGTGAGGGAAGACGG  
TCCTATGGATTGTAAACCTCTTTTGTCCGGGAGCAAAGAGGCCTCGTGAGGTCAAAAAGTG  
AGAGTACCCGAAGAAAAGCATCGGC

>160 len=156 tot-seq=2038

TGAGGAATATTGGTCAATGGCCGAGAGGCTGAACCAGCCAAGTCGCGTGAGGGATGAAGG  
TTCTATGGATCGTAAACCTCTTTTATAAGGGAATAAAGTGCGGGACGTGTCCCGTTTTGT  
ATGTACCTTATGAATAAGGATCGGCTAACTCCGTGG

>161 len=152 tot-seq=2037

TAGGGAATTTTCGGCAATGGGCGAAAGCCTGACCGAGCAACGCCGCGTGAGTGATGACGG  
CCTTCGGGTTGTAAAGCTCTGTTGTAAGAAAAGATAAACTAGTAGAGAATATTAGTTAGA  
CATTATCTTACCAGAAAGCCACGGCTAACTAC

>162 len=160 tot-seq=2009

TAGGGAATCTCCGCAATGGGCGAAAGCCTGACGGAGCAACGCCGCGTGAGTGAAGAAGG  
ATTTTCGGTTCGTAAAGCTCTGTTGTTAGGGAAGAATGATTGTGTAGTAACTATACACAGT  
AGAGACGGTACCTAACCCAGAAAGCCACGGCTAACTACGTG

>163 len=134 tot-seq=1919

GAATTTTCGCAATGGGCGAAAGCCTGACGGAGCAATGCCGCGTGGAGGTAGAAGGCCCA  
CGGGTCGTGAACTCTTTTCCCGGAGAAGAAGCAATGACGGTATCTGGGGAATAAGCATC  
GGCTAACTCTGTGG

>164 len=132 tot-seq=1909

TGGGGGATATTGCACAATGGGGGGAACCCTGATGCAGCGACGCCGCGTGAGTGAAGAAGT  
AATTCGTTATGTAAAGCTCTATCAGCAGGGAAGAATAAATGACGGTACCTGAGTAAGAAG  
CCCCGGCTAACT

>165 len=155 tot-seq=1893

TGGGGAATTTTGGACAATGGGCGCAAGCCTGATCCAGCAATGCCGCGTGCGGGAAGAAGG

CCTTCGGGTTGTAAACCGCTTTTGGCAGGAACGAAACGGTGTCCGCTAATACCGGGCGCT  
AATGACGGTACCTGCAGAATAAGCACCGGCTAACT

>166 len=140 tot-seq=1887

TGGGGAATATTGCACAATGGGCGCAAGCCTGATGCAGCGACGCCGCGTGGGGGATGACGG  
CCTTCGGGTTGTAAACTCCTTCGTCAGGGACGAAGCGAAAGTGACGGTACCTGGATAAG  
AAGCACCGGCTAACTACGTG

>167 len=135 tot-seq=1881

TGGGGGATATTGCGCAATGGGGGCAACCCTGACGCAGCAACGCCGCGTGAAGGATGAAGG  
TTTTCGGATTGTAAACTTCTTTATTAAGGACGAAAATGACGGTACTTAATGAATAAGC  
TCCGGCTAACTACGT

>168 len=132 tot-seq=1880

TGGGGAATATTGCACAATGGGGGGAACCCTGATGCAGCGACGCCGCGTGGGTGAGGAAGT  
ACTTCGGTATGTAAAGCCCTATCAGCAGGGAAGAAAATGACGGTACCTGACTAAGAAGCC  
CCGGCTAACTAC

>169 len=143 tot-seq=1800

TGGGGAATATTGCACAATGGGCGCAAGCCTGATGCAGCGACGCCGCGTGCGGGATGACGG  
CCTTCGGGTTGTAAACCGCTTTTGACTGGGAGCAAGCCCTTCGGGGTGAGTGTACCTTC  
GAATAAGCACCGGCTAACTACGT

>170 len=159 tot-seq=1753

TGGGGAATATTGCACAATGGGCGCAAGCCTGATGCAGCCATGCCGCGTGTGTGAAGAAGG  
CCTTCGGGTTGTAAAGCACTTCAGTAAGGAGGAAAGGTTAAGTTTTAATAGAGCTTAGC  
TGTGACGTTACTTACAGAAGAAGCACCGGCTAACTCCGT

>171 len=140 tot-seq=1723

TGGGGAATATTGCACAATGGGCGAAAGCCTGATGCAGCGACGCCGCGTGGGGGATGACGG  
CCTTCGGGTTGTAAACCCCTTCAGTAGGGAAGAAGCGAAAGTGACGGTACCTGCAGAAG  
AAGCGCCGGCTAACTACGTG

>172 len=194 tot-seq=1719

TAGGGAATCTCCACAATGGACGAAAGTCTGATGGAGCAATACCATGTGAACGATGAAGG  
TCTTTTTGATTGTAAAGTTCTTTATGAGGGATAACAACCTGATAGTACCTCATGAATAAG



TGACAGCAAATATGTGGGGGGAGCCGCGTAATCAGCAGATCGGAAGAGCGTCGTGTAG  
GGGGGGAGGGGAGA

>173 len=154 tot-seq=1695

TGAGGAATATTGGTCAATGGACGAGAGTCTGAACCAAGTAGCGTGCAGGATGACGG  
CCCTATGGGTTGTAACTGCTTTTGTGGGGAATAACTGACATTACGTGTAATGTTTTGC  
ATGTACCCTTCGAATAAGGACCGGCTAATCCGT

>174 len=135 tot-seq=1686

TGGGGAATATTGCACAATGGGGGAAACCCTGATGCAGCGACGCCGCGTGAGTGAAGAAGT  
ATTCGGTATGTAAAGCTCTATCAGCAGGAACGAGACAAGACGGTACCTGACTAAGAAGC  
CCCGGCTAACTACGT

>175 len=213 tot-seq=1673

TGGGGAATTTTGGACAATGGGGGAAACCCTGATCCAGCCATCCCGCGTGTATGATGAAGG  
CCTTCGGGTTGTAAAGTACTTTTGGCAGAGAAGAAAAGGTACCTCCTAATACGAGGTACT  
GCTGACGGTATCTGCAGAATAAGCACCGGCTAACTACGTGGGGGGAGCCGCGTAATACG  
AAGATCGGAAGAGCGTCGTGTAGGAAAGAGTG

>176 len=139 tot-seq=1656

TGGGGAATATTGCACAATGGGGGAAACCCTGATGCAGCGACGCAGCGTGCGGGATGACGG  
CCTTCGGGTTGTAAACCGCTTTCAGCAGGGAAGAAGCGCAAGTGACGGTACCTGCAGAAG  
AAGTACCGGCTAACTACGT

>177 len=149 tot-seq=1559

TGGGGGATATTGCACAATGGGGGAAACCCTGATGCAGCGACGCCGCGTGAGTGAAGAAGT  
ATTCGGTACGTAAAGCTCTATCAGCAGGGAAGAAAAAAGTCCACAGGACTTTGGACGG  
TACCTGACTAAGAAGCCCCGGCTAACTAC

>178 len=160 tot-seq=1557

TGGGGAATATTGGACAATGGGCGAAAGCCTGATCCAGCCATGCCGCGTGTGTGAAGAAGG  
TCTTCGGATTGTAAAGCACTTTAAGTTGGGAGGAAGGGCATTAACTAATACGTTAGTGT  
TTTGACGTTACCGACAGAATAAGCACCGGCTAACTTCGTG

>179 len=156 tot-seq=1547

TAGGGAATTTTCGTCAATGGGGGAAACCCTGAACGAGCAATGCCGCGTGAGTGAGGAAGG

TCTTCGGATCGTAAAGCTCTGTTGTAAGAGAAAAACGACATTCATAGGGAATGATGAGTG  
AGTGATGGTATCTTACCAGAAAGTCACGGCTAACTA

>180 len=159 tot-seq=1533

TAGGGAATCTTCCGCAATGGGCGAAAGCCTGACGGAGCAACGCCGCGTGAGTGATGAAGG  
TCTTCGGATCGTAAACTCTGTTATTAGGGAAGAACAATGTGTAAGTAACTATGCACGT  
CTTGACGGTACCTAATCAGAAAGCCACGGCTAACTACGT

>181 len=138 tot-seq=1509

TGGGGAATATTGGGCAATGGAGGAACTCTGACCCAGCAACGCCGCGTGAATGATGAAGG  
TCTTCGGATTGTAAAGTCTTTTCTAAGGGAAGAAGAAAGTGACGGTACCTTAGGAATAA  
GCCTCGGCTAACTACGTG

>182 len=133 tot-seq=1497

TGGGGAATATTGGACAATGGGCGAAAGCCTGATCCAGCAATGCCGCGTGAGTGATGAAGG  
CCTTAGGGTTGTAAAGCTCTTTTACCCGGGATGATAATGACAGTACCGGGAGAATAAGCT  
CCGGCTAACTCCG

>183 len=134 tot-seq=1477

TGGGGAATATTGGACAATGGGCGCAAGCCTGATCCAGCCATGCCGCGTGAGTGATGAAGG  
CCTTAGGGTTGTAAAGCTCTTTTCGTCGGGACGATAATGACGGTACCGGAAGAAGAAGCC  
CCGGCTAACTTCGT

>184 len=162 tot-seq=1440

TGGGGAATTTTGGACAATGGGGGCAACCCTGATCCAGCAATGCCGCGTGTGTGAAGAAGG  
CCTTCGGGTTGTAAAGCACTTTTGTCCGAAAGAAATCGCGCTGGTTAATACCTGGCGTG  
GATGACGGTACCGGAAGAATAAGCACCGGCTAACTACGTGGG

>185 len=157 tot-seq=1437

TGAGGAATATTGGTCAATGGGCGCGAGCCTGAACCAGCCAAGTCGCGTGAGGGATGACGG  
TCCTACGGATTGTAAACCTCTTTTGCCGGGGAGCAAGCGTGCGTTCGTGAACGCGCGTCG  
AGAGTACCCGGAGAAAAAGCATCGGCTAACTCCGTGG

>186 len=139 tot-seq=1421

TGGGGAATTTTGCACAATGGGCGGAAGCCTGATGCAGCGACGCCGCGTGGGGGATGAAGG  
CCTTCGGGTTGTAAACTCCTTTTCGTCAGGGACGAAGTTTGTGACGGTACCTGGATAAG

AAGCACCGGCTAACTACGT

>187 len=153 tot-seq=1404

TGAGGAATATTGGTCAATGGGCGAGAGCCTGAACCAGCCAAGTAGCGTGCAGGATGACGG  
CCCTATGGGTTGTAAACTGCTTTTATAAGGGAATAAAGTGAGAGTCGTGACTCTTTTTGC  
ATGTACCTTATGAATAAGGACCGGCTAATTCCG

>188 len=134 tot-seq=1401

TGGGGAATTTTGCACAATGGGGGAAACCCTGATGCAGCGACGCCGCGTGATTTAGAAGGC  
CTTCGGGTTGTAAAAATCTTTTTACGGGATGAAAATGACAGTACCGTAAGAATAAGGTC  
CGGCTAAATACGTG

>189 len=158 tot-seq=1380

TGGGGAATATTGCGCAATGGGGGCAACCCTGACGCAGCCATGCCGCGTGAATGAAGAAGG  
CCTTCGGGTTGTAAAGTTCTTTTCGGTAGCGAGGAAGGCATTTAGTTTAATAGACTAGGTG  
ATTGACGTTAACTACAGAAGAAGCACCGGCTAACTCCG

>190 len=161 tot-seq=1363

TAGGGAATCTTCCACAATGGACGCAAGTCTGATGGAGCAACGCCGCGTGAGTGAAGAAGG  
TTTTCGGATCGTAAAGCTCTGTTGTTAGAGAAGAACGTTGGTAGGAGTGAAAAATCTACC  
AAGTGACGGTAACTAACCAGAAAGGGACGGCTAACTACGTG

>191 len=134 tot-seq=1354

TGGGGAATATTGCACAATGGGCGAAAAGCCTGATGCAGCGACGCCGCGTGAGCGAAGAAGT  
ATTTCCGGTATGTAAAGCTCTATCAGCAGGGAAGAAAAAATGACGGTACCTGACTAAGAA  
GCCCCGGCTAACTA

>192 len=135 tot-seq=1353

TGGGGGATATTGCACAATGGGGGAAACCCTGATGCAGCGACGCCGCGTGTGGGAAGACGG  
TCCTCTGGATTGTAAACCACTGTCCCCAGGGACGAAAATGACGGTACCTGGGGAGGAAGC  
TCCGGCTAACTACGT

>193 len=135 tot-seq=1334

TGGGGAATATTGCACAATGGAGGGAACCTGATGCAGCGACGCCGCGTGAGTGATGAAGG  
AATTCGTTTCGTAAACTCTGTTCTATGGGAAGAAAAGGACTGTACCATAGGAGAAAGCT  
CCGGCTAAATACGTG

>194 len=135 tot-seq=1314

TGGGGAATATTGCACAATGGGGGAAACCCTGATGCAGCAACGCCGCGTGAGTGAAGAAGT  
CATTCTGATGTAAAGCTCTATCAGCAGGGAAGAAAATGACGGTACCTGAGTAAGAAGCC  
CCGGCTAACTACGTG

>195 len=138 tot-seq=1296

TGGGGAATATTGGGCAATGGGCGCAAGCCTGACCCAGCAACGCCGCGTGAAGGAAGAAGG  
CTTTCGGGTTGTAACTTCTTTTGTGAGGGAAGAGTAGAAGACGGTACCTGACGAATAAG  
CCACGGCTAACTACGTGG

>196 len=141 tot-seq=1260

TGGGGAATATTGCACAATGGGCGCAAGCCTGATGCAGCGACGCCGCGTGCGGGATGACGG  
CCTTCGGGTTGTAAACCGCTTTTGATCGGGAGCAAGCCTTCGGGTGAGTGTACCTTTTGA  
ATAAGCACCGGCTAACTACGT

>197 len=161 tot-seq=1228

TGGGGAATATTGGACAATGGGCGCAAGCCTGATCCAGCCATGCCGCGTGTGTGAAGAAGG  
CCTTTTGGTTGTAAAGCACTTTAAGCGAGGAGGAGGCTACTTGGATTAATACTCTAGGAT  
AGTGGACGTTACTCGCAGAATAAGCACCGGCTAACTCTGTG

>198 len=201 tot-seq=1226

TGGGGAATCTTGCACAATGGGCGAAAAGCCTGATGCAGCGACGCCGCGTGCGGGATGAAGG  
CCTTCGGGTTGTAAACCGCTTTTGATTGGGAGCAAGCCTTCGGGTGAGTGTACCTTTTGA  
ATAAGCGCCGGCTAACTACGTGGGGGGAGCCGCGGTATGACCAGATCGGAAGAGCATCGT  
GTAGGGAAAGAGTGGGCCAAT

>199 len=158 tot-seq=1219

TGGGGAATATTGCACAATGGGCGCAAGCCTGATGCAGCCATGCCGCGTGTATGAAGAAGG  
CCTTCGGGTTGTAAAGTACTTTTTCAGCGAGGAGGAAGGCATTGTGGTTAATAACCGCAGTG  
ATTGACGTTACTCGCAGAAGAAGCACCGGCTAACTCCG

>200 len=131 tot-seq=1215

GCACGCAAGTTACCCACTCCGGACCTGGGGATGTAGTGATGAAAAATAATACAGGACTCT  
TTTGAGGGCCTGTAATTGGAATGAGTCCACTTTAAATCCTTTAACGAGGATCCATTGGAG  
GGCAAGTCTGG

>201 len=154 tot-seq=1215

TGAGGAATATTGGTCAATGGGCGCTAGCCTGAACCAGCCAAGTAGCGTGAAGGATGACTG  
CCCTATGGGTTGTAAACTTCTTTTATATGGGAATAAAGTGCAGTATGTATACTGCTTTGC  
ATGTACCTTATGAATAAGGATCGGCTAACTCCGT

>202 len=158 tot-seq=1187

TGGGGAATTTTGGACAATGGGGGAAACCCTGATCCAGCCATGCCGCGTGCGGGATGAAGG  
CCTTCGGGTTGTAAACCGCTTTTGTGAGAGACGAAAAGGGACGTACGAATAATACGTTCC  
GCTGACGGTATCTGAAGAATAAGCACCGGCTAACTACG

>203 len=128 tot-seq=1186

TGGGGAATATTGCACAATGGGCGAAAGCCTGATGCAGCAACGCCGCGTGAAGGATGAAGG  
GTTTCGGCTCGTAAACTTCTATCAATAGGGAAGAAACAAATGACGGTACCTAAATAAGAA  
GCCCCGGC

>204 len=138 tot-seq=1172

TGGGGAATTTTCCGCAATGGGCGCAAGCCTGACGGAGCAATACCGCGTGAGGGATGACGG  
CCTTTGGGTTGTAAACCTCTTTTATCAAGGAGGAAGTTCTGACGTGTACTTGATGAATAA  
GCATCGGCTAACTCCGTG

>205 len=134 tot-seq=1170

TGGGGGATATTGCACAATGGGGGGAACCCTGATGCAGCGACGCCGCGTGGGCGATGGAGT  
GCTTCGGCATGTAAAGCCCTATCAGCAGGGAAGAAAATGACGGTACCTGACTAAGAAGCC  
CCGGCTAAATACGT

>206 len=135 tot-seq=1123

TGGGGAATATTGGACAATGGGGGCAACCCTGATCCAGCCATGCCGCGTGAGTGATGAAGG  
CCCTAGGGTTGTAAAGCTCTTTTGTGCGGGAAGATAATGACGGTACCGCAAGAATAAGCC  
CCGGCTAACTTCGTG

>207 len=160 tot-seq=1111

TGGGGAATCTCCGCAATGGACGAAAGTCTGACGGAGCAACGCCGCGTGAGTGATGAAGG  
TCTTCGGATTGTAAAGCTCTGTTAATCGGGACGAAAGAGTTCTGTGTGAATAATGCAGAA  
AAGTGACGGTACCGGAATAGAAAGCCACGGCTAACTACGT

>208 len=134 tot-seq=1099

TGGGGAATCTTAGACAATGGGGGCAACCCTGATCTAGCCATGCCGCGTGAGTGATGAAGG  
CCTTAGGGTTGTAAAGCTCTTTCAGCTGGGAAGATAATGACGGTACCAGCAGAAGAAGCC  
CCGGCTAACTCCGT

>209 len=157 tot-seq=1089

TGAGGAATATTGGTCAATGGGCGCGAGCCTGAACCAGCCAAGTCGCGTGAGGGAAGACGG  
TCCTATGGATTGTAAACCTCTTTTGTCTGGGGAGCAATGGTCTTCACGTGTGGAGACTGTG  
AGAGTACCCGAAGAAAAGCATCGGCTAACTCCGTGG

>210 len=134 tot-seq=1086

TGGGGAATCTTGCGCAATGGGGGGAACCCTGACGCAGCGACGCCGCGTGCGGGACGGAGG  
CCTTCGGGTCGTAAACCGCTTTCAGCAGGGAAGAGTCAAGACTGTACCTGCAGAAGAAGC  
CCCGGCTAACTACG

>211 len=152 tot-seq=1061

TGAGGAATATTGGTCAATGGCCGAGAGGCTGAACCAGCCAAGTCGCGTGAGGGATGACGG  
CCCTACGGGTTGTAAACCTCTTTTGTCTAGGGAGCAAGGGGCGCCACGTGTGGCGCTGTGA  
GAGTACCTGAAGAAAAGCATCGGCTAACTCC

>212 len=157 tot-seq=1046

TGGGGAATATTGCACAATGGGGGGAACCCTGATGCAGCCATGCCGCGTGAATGAAGAAGG  
CCTTCGGGTTGTAAAGTTCTTTCGGTGACGAGGAAGGTTGATAGGTTAATAGCCTATCAA  
ATTGACGTTAATCACAGAAGAAGCACCGGCTAACTCC

>213 len=157 tot-seq=1039

TAGGGAATCTCCGCAATGGGCGAAAGCCTGACGGAGCAACGCCGCGTGAGTGATGAAGG  
GTTTCGGCTCGTAAACTCTGTTATTAGGGAAGAACAATGTGTAAGTAACTGTGCACAT  
CTTGACGGTACCTAATCAGAAAGCCACGGCTAACTAC

>214 len=159 tot-seq=1039

TAGGGAATCTCCGCAATGGACGCAAGTCTGACGGAGCAACGCCGCGTGAGTGAAGAAGG  
TTTTCGGATCGTAAACTCTGTTGTTAGAGAAGAACAAGTCTAGAGTAACTGTTAGCGC  
CTTGACGGTATCTAACCAGAAAGCCACGGCTAACTACGT

>215 len=130 tot-seq=990

GGTAGAGGAAAACAGGGGGCCCTAACAGGGCTAAGTTCCAGCTTACCACTCATAAAAAT

AGTGGTACTTTTGGCCAGCTGGGTGTTATGAAAAGTAGAAATAATAAATGTGAACAACC  
TATCGTGATG

>216 len=158 tot-seq=990

TAGGGAATCTTCCACAATGGACGAAAGTCTGATGGAGCAACGCCGCGTGAACGATGAAGG  
CCCTCGGGTCGTAAAGTTCTGTTGTAAGGGAAGAACAAGTGCCGCAGGCAATGGCGGCAC  
CTTGACGGTACCTTGCGAGAAAGCCACGGCTAACTACG

>217 len=136 tot-seq=973

GCATGCAAATTACCCACTCCTGACTCGAGGAGGTAGTGATGAAACATAACAATACAGGAC  
TCTTCGAGGTCCTGTAATTGGAATGAGTCCACTTTAAATCCTTTAACGAAGATCCATTG  
GAGGGCAAGTTTAGTG

>218 len=207 tot-seq=924

TAGGGAATTTTCGTCAATGGGGGAAACCCTGAACGAGCAATGCCGCGTGAGTGAAGAAGG  
CCTTCGGGTCGTAAAGCTCTGTTGTAAGAGAAAAACGGTAATGATAGGGAATGATCATT  
AGTGATGGTATCTTACGAGGAAGCCACGGCTAACTACGTGGGGGGAGCCGCGTAATATG  
GAGATCGGAAGAGCGTCGTGTAGGGAA

>219 len=132 tot-seq=916

TGGGGGATATTGCACAATGGGGGAAACCCTGATGCAGCGACGCCGCGTGGGCGATGGAGC  
GCCTCGGCGCGTAAAGCCCTATCAGCAGGGAAGAAGATGACGGTACCTGACTAAGAAGCC  
CCGGCTAAATAC

>220 len=160 tot-seq=908

TGGGGAATATTGCACAATGGGCGCAAGCCTGATGCAGCCATGCCGCGTGTATGAAGAAGG  
CCTTCGGGTTGTAAAGTACTTTTCAGTCGTGAGGAAGGGGTATCGTTAATAGCGGTATTC  
TTTGACGTTAGCGACAGAAGAAGCACCGGCTAACTCCGTG

>221 len=160 tot-seq=907

TGGGGAATCTTCGCAATGGACGAAAGTCTGACGGAGCAACGCCGCGTGAGTGATGACGG  
CCTTCGGGTTGTAAAGCTCTGTTAATCGGGACGAATGGTTCTTGTGCGAATAGTGCGAGG  
ATTTGACGGTACCGGAATAGAAAGCCACGGCTAACTACGT

>222 len=134 tot-seq=906

TGGGGAATATTGCACAATGGGGGAAACCCTGATGCAGCGACGCCGCGTGAGTGAAGAAGT

AATTCGTTATGTAAAGCTCTATCAGCAGGGAAGAAACAGACGGTACCTGAGTAAGAAGCC  
CCGGCTAACTACGT

>223 len=156 tot-seq=902

TGAGGAATATTGGTCAATGGAGGAAACTCTGAACCAGCCAAGTCGCGTGAAGGAAGAATG  
TCCTAAGGATTGTAACTTCTTTAGCGAGTGAGTAAGGACTTCCACGCGTTGGGAGTTTG  
AAAGTAGCTCGAGAATAAGTATCGGCTAACTCCGTG

>224 len=187 tot-seq=897

TCTCCTGGTACTCACTCCCTCATGCTACCTTAGCCTAGATCAACCCCTCACCTTCTCT  
GTCAGGAGTCAGAGGGAGAGGCCAACCTTCCCATGGCAGCTGCCATACTGGCCTGAGCC  
ATACTCAGGCCATACTGAGTGCTCAGGCCATACTATGCCATACTGGCCCCCTTGACCCTG  
CCTCCTT

>225 len=109 tot-seq=895

ATTATTAACAGGAAAAGCAAATTGGCTAAGTTTATGACAACTACAGTACTGGGACAA  
ACATATCTGTGCCTTTGAAAGCCCTAATACCCAAAGTGTGATCTGAAGA

>226 len=159 tot-seq=894

TGGGGAATCTTCCGCAATGGGCGCAAGCCTGACGGAGCAATGCCGCGTGAGTGAAGAAGG  
CCTTCGGGTTGTAAACTCTGTCCTCATCCAAGAGAGACCTGTAGTAACTGCCAGGTC  
TAGGACGGTAGATGAGGAGGAAGCCCCGGCTAACTATGT

>227 len=159 tot-seq=885

TGGGGAATCTTCCGCAATGGGCGAAAGCCTGACGGAGCAACGCCGCGTGAGTGAAGACGG  
CCTTCGGGTTGTAAACTCTGTTATACGGGACGAATGTAGGCATGGTTAATACCCATGCG  
TAGTGACGGTACCGTAAGAGAAAGCCACGGCTAACTACG

>228 len=137 tot-seq=876

TGGGGGATATTGCACAATGGGCGAAAGCCTGATGCAGCGACGCCGCGTGAGGGAAGACGG  
CCTTCGGGTTGTAAACCTCTGTCATTCGGGACGAATTAGATGACGGTACCGAAGAAGGAA  
GCTCCGGCTAACTACGT

>229 len=138 tot-seq=868

TGGGGAATATTGCGCAATGGGGGGAACCCTGACGCAGCAACGCCGCGTGAAGGAGGAAGT  
ATTCGGTATGTAACTTCTATCAGCAGGGAAGAAGGAAGTGACGGTACCTGCATAAGAA



GCCCCGGCTAATTACGTG

>230 len=137 tot-seq=850

TGGGGAATATTGCACAATGGGGGAAACCCTGATGCAGCAACGCCCGTGAAGGAAGACGG

TTTTCGGATTGTAACTTCTATCAATAGGGACGAAAGAAATGACGGTACCTAAATAAGAA

GCCCCGGCTAACTACGT

>231 len=160 tot-seq=848

TAGGGAATTTTCGTCAATGGAGGGAACCTCTGAACGAGCAATGCCCGTGAAGGAAGG

TCTTCGGATCGTAAAGCTCTGTTGCAAGAGAAAACGACAAGCACAGGGAATGGTGATTG

AGTGATGGTATCTTGCGAGGAAGCCACGGCTAACTACGTG

>232 len=180 tot-seq=844

TGGGGAATCTTGCGCAATGGGCGAAAGCCTGACGCAGCCATGCCCGTGAATGATGAAGG

TCTTAGGATTGTAAAATTCTTTCACCGGGGACGATAATGACGGTACCCGGAGAAGAAGCC

CCGGCTAACTTCGTGGGGGGAGCCGCGGTATAAGCAGATCGGAAGCGCGTCGTGTAGGGA

>233 len=155 tot-seq=843

TGAGGAATATTGGTCAATGGACGCAAGTCTGAACCAGCCATGCCCGTGCAGGATGACGG

CTCTATGAGTTGTAACTGCTTTTGTACGAGGGTAAACGCAGATACGTGTATCTGTCTGA

AAGTATCGTACGAATAAGGATCGGCTAACTCCGTG

>234 len=153 tot-seq=819

TGAGGAATATTGGTCAATGGGCGAGAGCCTGAACCAGCCAAGTCGCGTGAAGGATGACGG

CCCTACGGGTTGTAACTTCTTTTGTACGGGAGCAATTGAGTCCACGTGTGGGCTTAGCG

AGAGTACCTGAAGAAAAGCATCGGCTAACTCC

>235 len=137 tot-seq=811

TGGGGAATATTGGGCAATGGAGGAACTCTGACCCAGCAACGCCCGTGGAGGAAGAAGG

TTTTCGGATCGTAACTCCTGTCTTGGAGACGAGTAGAAGACGGTATCCAAGGAGGAAG

CCCCGGCTAACTACGTG

>236 len=155 tot-seq=807

TGAGGAATATTGGTCAATGGGCGGAAGCCTGAACCAGCCAAGTAGCGTGCAGGATGACGG

CCCTACGGGTTGTAACTGCTTTTATACGGGAATAACGCGCCTTACGTGTAGGGCTTTGC

ATGTACCGTATGAATAAGGACCGGCTAATTCCGTG

>237 len=161 tot-seq=801

TGGGGAATCTCCGCAATGGGCGAAAGCCTGACGGAGCAACGCCGCGTGAGTGAAGACGG  
CCTTCGGGTTGTAAAGCTCTGTTATACGGGACGAATAGTCTTATGGTTAATACCCATGAG  
AAGTGACGGTACCGTAAGAGAAAGCCACGGCTAACTACGTG

>238 len=136 tot-seq=783

TGGGGAATTTTGCGCAATGGGGGCAACCCTGACGCAGCAACGCCGCGTGCGGGACGAAGG  
CGTCCGCGTCGTAAACCGCTTTCAGCGGGGAACACCTAAACGAGGGTACCCGCAGAAGAA  
GCCCCGGCTAAATACG

>239 len=134 tot-seq=762

TAGGGAATTTTGCGCAATGGGGGCAACCCTGACGCAGCAACGCCGCGTGATCGATTAAGC  
CCTTCGGGGTGTAAAGATCTGTCAGTGGGGACGAAAGATGACGGTACCCACAGAGGAAGC  
ACCGGCTAACTCCG

>240 len=155 tot-seq=743

TGAGGAATATTGGTCAATGGGCGAGAGCCTGAACCAGCCAAGTCGCGTGAAGGATGAAGG  
ATCTATGGTTTGTAAACTTCTTTTATATGGGAATAAAGTGAGGAACGTGTTCCTTTTTGT  
ATGTACCATATGAATAAGCATCGGCTAACTCCGTG

>241 len=171 tot-seq=742

TGAGGAATATTGGTCAATGGGCGTGAGCCTGAACCAGCCAAGTAGCGTGCAGGAAGACGG  
CCCTATGGGTTGTAAACTGCTTTTATGCGGGGATAAAGGAGTCCACGTGTGGATTTTTGC  
AGGTACCGCATGAATAAGGACCGGCTAATCCGTGGGGGGAGACGGGGAAT

>242 len=135 tot-seq=726

TGAGGGATATTGGTCAATGGGGGAAACCCTGAACCAGCAACGCCGCGTGAGGGAAGACGG  
TTTTCGGATTGTAAACCTCTGCTCTGTGAAGATAGTGACGGTAGCAGAGGAGGAAGCT  
CCGGCTAACTACGTG

>243 len=153 tot-seq=713

TGAGGAATATTGGACAATGGGTTAGCGCCTGATCCAGCCATCCCGCGTGAAGGACGACGG  
CCCTATGGGTTGTAAACTTCTTTTGTATAGGGATAAACCTACTCTCGTGAGAGTAGCTGA  
AGGTACTATACGAATAAGCACCGGCTAACTCCG

>244 len=155 tot-seq=711

TGAGGAATATTGGTCAATGGGCGAGAGCCTGAACCAGCCAAGTAGCGTGCAGGATGACGG  
CCCTATGGGTTGTAAACTGCTTTTATGCGGGGATAACCGGCCTCACGTGTGAGGCCCTGC  
AGGTACCGCATGAATAAGGACCGGCTAATTCCGTG

>245 len=135 tot-seq=704

TGGGGAATTTTGCACAATGGAGGAACTCTGATGCAGCGACGCCGCGTGAACGAAGAAGG  
TCTTCGGATTGTAAAGTTCTGTCCTGGGTGAAGATAATGACGGTAACTCAGGAGGAAGCC  
CCGGCTAACTACGTG

>246 len=160 tot-seq=698

TAGGGAATCTCCGCAATGGACGCAAGTCTGACGGAGCAACGCCGCGTGAGTGATGAAGG  
GTTTCGGCTCGTAAACTCTGTTGTTAAGGAAGAACAACCTGAGGTAGTAACTGGCCTTGA  
GATGACGGTACTTAACCAGAAAGCCACGGCTAACTACGTG

>247 len=139 tot-seq=689

TGGGGAATATTGCACAATGGGCGGAAGCCTGATGCAGCGACGCCGCGTGGGGGATGACGG  
CCTTCGGGTTGTAAACTCCTTTCACCATCGACGAAGTTTTCTGACGGTAGATGGAGAAG  
AAGCACCGGCTAACTACGT

>248 len=136 tot-seq=679

AACTCAAATTACCCACTCCTGACACGGGGAGGTAGTGACGAAAAATAACAATACAGGAC  
TCTTCTAGGCCCTGTAATTGGAATGAGTGCACTTTAAATCTTTAATGAGGATCAATTG  
GAGGGCAAGTCTGGTG

>249 len=138 tot-seq=665

TGGGGAATATTGGGCAATGGGGGAAACCCTGACCCAGCAACGCCGCGTGAAGGAAGAAGG  
CTTTCGGGTTGTAAACTTCTTTTACCAGGGACGAAGGACGTGACGGTACCTGGAGAAAAA  
GCCACGGCTAACTACGTG

>250 len=160 tot-seq=648

TAGGGAATTTTCGTCAATGGGGGAAACCCTGAACGAGCAATGCCGCGTGTGTAAAGAAGG  
TCTTCGGATCGTAAAGCACTGTTGTAAGTGAAGAATGCCACATAGAGGAAATGCTATGTG  
GGTGACGGTAGCTTACCAGAAAGCCACGGCTAACTACGTG

>251 len=161 tot-seq=648

TAGGGAATCTCCACAATGGACGCAAGTCTGATGGAGCAACGCCGCGTGAGTGAAGAAGG

TTTTCGGATCGTAAAGCTCTGTTGTAAGAGAAGAACGTGTGTGAGAGTGGAAAGTTCACA  
CAGTGACGGTAACTTACCAGAAAGGGACGGCTAACTACGTG

>252 len=160 tot-seq=637

TAGGGAATTTTCGGCAATGGGGGAAACCCTGACCGAGCAACGCCGCGTGAGGGAAGAAGT  
ATTTCCGGTATGTAAACCTCTGTTATAAAGGAAGAACGGTATGAATAGGAAATGATTCATA  
AGTGACGGTACTTTATGAGAAAGCCACGGCTAACTACGTG

>253 len=178 tot-seq=635

TAGGGAATCTTCGGCAATGGACGGAAGTCTGACCGAGCAACGCCGCGTGAGTGAAGAAGG  
TTTTCGGATCGTAAAGCTCTGTTGTTGTTGTAAGAAGGATAGAGGTAGTAACTGGCCTTTA  
TTTGACGGTAATCAACCAGAAAGTCACGGCTAACTACGTGGGGGGAGCCGCGGAATGC

>254 len=140 tot-seq=618

TGGGGAATATTGCACAATGGGCGCAAGCCTGATGCAGCGACGCCGCGTGAGGGATGACGG  
CCTTCGGGTTGTAAACCTCTGTTAGCATCGAAGAAGCGAAAGTGACGGTAGGTGCAGAGA  
AAGCGCCGGCTAACTACGTG

>255 len=159 tot-seq=611

TAGGGAATTTTCGGCAATGGGCGAAAGCCTGACCGAGCAACGCCGCGTGAACGAAGAAGG  
TCTTCGGATTGTAAAGTTCTGTTATAGAGGAAGAACGGTGTACGTAGGAAATGACGTACA  
AGTGACGGTACTCTGTGAGGAAGCCACGGCTAACTACGT

>256 len=158 tot-seq=608

TGGGGAATTTTGGACAATGGGGGCAACCCTGATCCAGCCATGCCGCGTGCAGGATGAAGG  
CCTTCGGGTTGTAACTGCTTTTGTGAGGGACGAAAAGGACCGTGTTAATACCATGGTCT  
GCTGACGGTACCTGAAGAATAAGCACCGGCTAACTACG

>257 len=136 tot-seq=603

GCACGCAAATTACCCACTCTCGACCCGGGGAGGTAGTGACGAAAATAACAATACAGGAC  
TCTTTTGAGGCCCTGTAATTGGAATGAGTCCACTTTAAATCCTTTAACAAGGATCCATTG  
GAGGGCAAGTCTGGTG

>258 len=135 tot-seq=602

TAGGGAATATTGCGCAATGGGGGAAACCCTGACGCAGCAACGCCGCGTGGAGGATGACAC  
TTTTCGGAGCGTAACTCCTTTTATCGGGAAAGAATAATGACGGTACCCGATGAATAAGC

ACCGGCTAACTCCGT

>259 len=138 tot-seq=597

TGGGGGATATTGCGCAATGGGGGAAACCCTGACGCAGCAACGCCGCGTGAAGGAAGAAGG  
TCTTCGGATTGTAACTTCTTTTGTGACGGGACGAAGAAAGTGACGGTACCTGACGAATAA  
GCTCCGGCTAACTACGTG

>260 len=177 tot-seq=592

TAGGGAATCTTCGGCAATGGGGGCAACCCTGACCGAGCAACGCCGCGTGAGTGAAGAAGG  
TTTTCGGATCGTAAAGCTCTGTTGTAAGAGAAGAACGTGTGTGAGAGTGGAAAGTTCACA  
CAGTGACGGTAACTTACCAGAAAGGGACGGCTAACTACGTGCCAGCAGCCGCGGTAA

>261 len=138 tot-seq=587

TGGGGAATATTGGGCAATGGGGGAAAGCCTGACCCAGCAACGCCGCGTGAGGGAAGAAGG  
TTTTCGGATTGTAAACCTCTGTCCTTGGTGACGAAGGAAGTGACGGTAGCCAAGGAGGAA  
GCCCCGGCTAACTACGTG

>262 len=135 tot-seq=586

TGGGGAATATTGCACAATGGGGGAAACCCTGATGCAGCAACGCCGCGTGGGTGAAGGAGC  
GTTTCGGCGCGTAAAGCCCTGTCAGCGGGGAAGAAGAAAGACGGTACCCGACCAAGAAGC  
CCCGGCTAACTACGT

>263 len=136 tot-seq=586

TAGGGAATATTGCTCAATGGGGGAAACCCTGAAGCAGCAACGCCGCGTGGAGGATGACAC  
TTTTCGGAGCGTAAACTCCTTTTCTTTGGGAAGAATAATGACGGTACCAAAGGAATAAGC  
ACCGGCTAACTCCGTG

>264 len=155 tot-seq=585

TGAGGAATATTGGTCAATGGGCGAGAGCCTGAACCAGCCAAGTAGCGTGAAGGATGACCG  
CCCTATGGGTTGTAACTTCTTTTATATGGGAATAAAGGGTGCCACGTGTGGCATTTTGT  
ATGTACCATATGAATAAGGATCGGCTAACTCCGTG

>265 len=144 tot-seq=581

TGGGGAATATTGCACAATGGGCGCAAGCCTGATGCAGCGACGCCGCGTGGGGGATGAAGG  
CCTTCGGGTTGTAAACTCCTTCGCTATCGACGAAGCCACTTGTGGTGACGGTAGGTAGA  
TAAGAAGCACCGGCTAACTACGTG

>266 len=139 tot-seq=577

TGGGGAATATTGGACAATGGACCAAAAGTCTGATCCAGCAATTCTGTGTGCACGATGACG  
GTCTTAGGATTGTAAAGTGCTTTCAATCGGGAAAAAGAAAGTGATGGTACCGATAGAAGA  
AGCGACGGCTAAATACGTG

>267 len=140 tot-seq=573

TGGGGAATATTGCACAATGGGCGCAAGCCTGATGCAGCGACGCCGCGTGAGGGATGACGG  
CCTTCGGGTTGTAAACCTCTGTTAGCAGGGAAGAAGAGAGATTGACGGTACCTGCAGAGA  
AAGCGCCGGCTAACTACGTG

>268 len=153 tot-seq=560

TGGGGAATATTGCACAATGGGCGAAAGCCTGATGCAGCGACGCCGCGTGAGGGATGGAGG  
CCTTCGGGTTGTAAACCTCTTTAGTAAGGGTGAAGGCTCTCTTTGTGGGGGGTTGACA  
GTACTTGCAGAAGAAGCGCCGGCTAACTACGTG

>269 len=135 tot-seq=554

TGGGGAATATTGCACAATGGGGGGAACCCTGATGCAGCAATGCCGCGTGGGTGAAGAAGC  
ACTCCGGTGCCTAAAGCCCTGTCAGCAGGGAAGAAAATGACAGTACCTGGACAAGAAGCC  
CCGGCTAACTACGTG

>270 len=159 tot-seq=551

TGGGGAATTTTGGACAATGGGCGCAAGCCTGATCCAGCAATGCCGCGTGAGTGAAGAAGG  
CCTTCGGGTTGTAAAGCTCTTTGTCAGGGAAGAAACGGTAGAGGCTAATATCCTTTGCT  
AATGACGGTACCTGAAGAATAAGCACCGGCTAACTACGT

>271 len=136 tot-seq=546

TGGGGAATATTGCACAATGGGCGCAAGCCTGATGCAGCAACGCCGCGTGAACGAAGAAGG  
CCTTCGGGTCGTAAAGTTCTGTCCATAGGGAAGAAACAAATGACGGTACCTATGGAGGAA  
GCCCCGGCTAAATACG

>272 len=178 tot-seq=544

TAGGGAATCTCCACAATGGGCGAAAGCCTGATGGAGCAACGCCGCGTGAGTGAAGAAGG  
TTTTCGGATCGTAAAGCTCTGTTGTTGGTGAAGAAGGATAGAGGTAGTAACTGGCCTTTA  
TTTGACGGTAATCAACCAGAAAGTCACGGCTAACTACGTGGGGGGAGCCGCGGTAATG

>273 len=141 tot-seq=540

TAGGGAATTTTCGGCAATGGGGGGAACCCTGACCGAGCAACGCCGCGTGAACGAAGAAGT  
TATTCGTAATGTAAAGTTCTTTTATCAGGGAAGAAAGAGGAATTTGACGGTACTTGAGGA  
ATAAGCTCCGGCTAACTACGT

>274 len=160 tot-seq=523

TAGGGAATTTTCGTCAATGGGCGCAAGCCTGAACGAGCAATGCCGCGTGAACGAGGAAGG  
TCTTCGGATCGTAAAGTTCTGTTGAAGGGGAAAAAGAGCGGAGAGAGGAAATGGTCTCCG  
ATTGATATTACCCTTCGAGGAAGTCACGGCTAACTACGTG

>275 len=138 tot-seq=522

TGGGGAATATTGCGCAATGGGGGAAACCCTGACGCAGCAACGCCGCGTGATTGAAGAAGG  
CCTTCGGGTTGTAAAGATCTTTAATCAGGGACGAAACAAATGACGGTACCTGAAGAATAA  
GCTCCGGCTAACTACGTG

>276 len=160 tot-seq=519

TGGGGAATATTGGACAATGGGGGGAACCCTGATCCAGCAATGCCGCGTGTGTGAAGAAGG  
CCTGAGGGTTGTAAAGCACTTTCAGTGGGGAGGAGGATTGATAGGTTAAGAGCTGATTGA  
TTGGACGTTACCCACAGAAGAAGCACCGGCTAACTCCGTG

>277 len=160 tot-seq=517

TGGGGAATATTGCACAATGGGCGCAAGCCTGATGCAGCCATGCCGCGTGTGTGAAGAAGG  
CCTTCGGGTTGTAAAGCACTTTCAGCGGGGAGGAAGGCATTAAGGTTAATAACCTTAGTG  
ATTGACGTTACCCGAGAAAGAAGCACCGGCTAACTCCGTG

>278 len=160 tot-seq=516

TGGGGAATTTTGGACAATGGGCGAAAGCCTGATCCAGCCATGCCGCGTGCAGGATGAAGG  
CCTTCGGGTTGTAAACTGCTTTTGTACGGAACGAAAAGACTCTGGTTAATACCTGGGGTC  
CATGACGGTACCGTAAGAATAAGCACCGGCTAACTACGTG

>279 len=137 tot-seq=513

TGGGGAATATTGGGCAATGGAGGAAACTCTGACCCAGCAATGCCGCGTGAATGAAGAAGG  
TCTTCGGATTGTAAAGTTCTTTAGTCAGGGAAGAAGTCAATGACGGTACCTGAAGAATAA  
GCTCCGGCTAACTACGT

>280 len=152 tot-seq=507

TGAGGAATATTGGTCAATGGGCGAGAGCCTGAACCAGCCAAGTAGCGTGCAGGATGACGG

CCCTCCGGTTGTAACTGCTTTTAGTTGGAATAAAACAGCGGACTTGTCCGCTCTGT  
ATGTACCTTCAGAAAAAGGACCGGCTAATTCC

>281 len=160 tot-seq=504

TGGGAATTTTGGACAATGGGCGAAAGCCTGATCCAGCAATGCCGCGTGTGTGAAGAAGG  
CCTTCGGGTTGTAAAGCACTTTGTCCGAAAGAAATGGCTCTGGTTAATACCTGGGGTC  
GATGACGGTACCGGAAGAATAAGGACCGGCTAACTACGTG

>282 len=142 tot-seq=502

TGGGAATATTGCACAATGGACGGAAGTCTGATGCAGCGACGCCGCGTGGGGGATGAAGG  
CTTCGGGTTGTAACTCCTTCAGTACAGAAGAAGCTTTATTGTGACGGTATGTGCAGA  
AGAAGCGCCGGCTAACTACGTG

>283 len=137 tot-seq=499

TGGGAATATTGGGCAATGGACGCAAGTCTGACCCAGCAACGCCGCGTGAAGGAAGAAGG  
CTTCGGGTTGTAACTTCTTTAAGGGGGAAGAGTAGAAGACGGTACCCCTTGAATAAG  
CCACGGCTAACTACGTG

>284 len=134 tot-seq=493

TGGGGATATTGCACAATGGGGGAACCCTGATGCAGCGACGCCGCGTGGGTGAAGGAGC  
GTTTCGGCGCGTAAAGCCCTATCGGCAGGGAAGAAGGAGGACGGTACCTGACTAAGAAGC  
CCCGGCTAACTACG

>285 len=159 tot-seq=491

TGGGAATATTGCACAATGGGCGCAAGCCTGATGCAGCCATGCCGCGTGTGTGAAGAAGG  
CCTTCGGGTTGTAAAGCACTTCAGCGAGGAGGAAGGGTTCAGTGTTAATAGCACTGTTT  
ATTGACGTTACTCGCAGAAGAAGCACCGGCTAACTCCGT

>286 len=140 tot-seq=485

TGGGAATATTGCACAATGGGCGCAAGCCTGATGCAGCAACGCCGCGTGAGGGACGACGG  
CCTTCGGGTTGTAAACCTCTTTTAGCAGGGAAGAAGCGAAAGTGACGGTACCTGCAGAAA  
AAGCACCGGCTAACTACGTG

>287 len=135 tot-seq=484

TGGGGATATTGCACAATGGGGGAAACCCTGATGCAGCAACGCCGCGTGTGGGAAGAAGG  
TTTTCGGATTGTAAACCACTGTTCTTGGTGAAGATAATGACGGTAACCAAGGAGAAAGCT



CCGGCTAACTACGTG

>288 len=137 tot-seq=478

TGGGGAATATTGCACAATGGGGGGAACCCTGATGCAGCGACGCCGCGTGAGTGAAGAAGT  
ATTCGGTACGTAAAGCTCTATCAGCAGGGAAGAAAAAAGGACGGTACCTGAGTAAGAAG  
CCCCGGCTAACTACGTG

>289 len=137 tot-seq=477

TGGGGAATATTGCACAATGGGCGAAAGCCTGATGCAGCAACGCCGCGTGAGGGAAGACGG  
TTTTCGGATTGTAAACCTCTGTTTTTCGGTGACGAACAAATGACGGTAACCGAGTAGGAAG  
CCACGGCTAACTACGTG

>290 len=176 tot-seq=477

TAGGGAATCTTCCGCAATGGACGAAAGTCTGACGGAGCAACGCCGCGTGAGTGATGAAGG  
ATTCGGTTCGTAAAGCTCTGTTGTTAGGGAAGAACAAGTGCCGTTTGAATAGGTCGGCA  
CCTTGACGGTACCTAACAGAAAGCCACGGCTAACTACGTGGGGGGAGCCGAGGAA

>291 len=134 tot-seq=471

TGGGGAATATTGCACAATGGGCGAAAGCCTGATGCAGCGACGCCGCGTGAGTGAAGAAGT  
ATCTCGGTATGTAAAGCTCTATCAGCAGGGAAGAAAATGACGGTACCTGACTAAGAAGCC  
CCGGCTAACTACGT

>292 len=155 tot-seq=469

TGAGGAATATTGGTCAATGGGCGCGAGCCTGAACCAGCCAAGTAGCGTGAAGGATGACTG  
CCCTACGGGTTGTAAACTTCTTTTATAAAGGAATAAAGTGAGGCACGTGTGCCTTTTTGT  
ATGTACTTTATGAATAAGGATCGGCTAACTCCGTG

>293 len=135 tot-seq=468

TGGGGAATATTGCACAATGGAGGAAACTCTGATGCAGCGACGCCGCGTGAGCGATGAAGG  
CTTCGAGTCGTAAAGCTCTGTCCTATGGGAAGATAATGACGGTACCATAGGAGGAAGCC  
CCGGCTAACTACGTG

>294 len=135 tot-seq=467

TCGGGAATATTGCGCAATGGAGGAAACTCTGACGCAGTGACGCCGCGTATGGGAAGAAGG  
TTTTCGGATTGTAAACCATTTTAGACAAGGAAGAAACAAGACAGTACTTGTAGAATAAGC  
TCCGGCTAACTACGT

>295 len=159 tot-seq=466

TAGGGAATTTTCGGCAATGGGGGAAACCCTGACCGAGCAATGCCGCGTGAGTGAAGACGG  
CCTTCGGGTTGTAAAGCTCTGTTGTAAGGGAAGAACGGCATAGAGAGGGAATGCTCTATG  
AGTGACGGTACCTTACCAGAAAGCCACGGCTAACTACGT

>296 len=158 tot-seq=461

TGGGGAATATTGCACAATGGGCGCAAGCCTGATGCAGCAACGCCGCGTGAACGATGAAGG  
TCTTCGGATCGTAAAGTTCTGTTGCAGGGGAAGATAATGACGGTACCCTGTGAGGAAGCC  
CCGGCTAACTACGTGCCAGCAGCCGCGTAATCAGAAG

>297 len=160 tot-seq=449

TAGGGAATCTCCACAATGGGCGCAAGCCTGATGGAGCAACACCGCGTGAGTGAAGAAGG  
GTTTCGGCTCGTAAAGCTCTGTTGTTAGAGAAGAACGTGCGTGAGAGCAACTGTTACGC  
AGTGACGGTATCTAACCAGAAAGTCACGGCTAACTACGTG

>298 len=158 tot-seq=448

TAGGGAATCTCCACAATGGACGAAAGTCTGATGGAGCAACGCCGCGTGAGTGATGAAGG  
TTTTCGGATCGTAAACTCTGTTGTAAGGGAAGAACACGTACGAGAGGAAATGCTCGTAC  
CTTGACGGTACCTTACGAGAAAGCCACGGCTAACTACG

>299 len=135 tot-seq=447

TCGGGAATTTTGGGCAATGGGCGAAAGCCTGACCCAGCAACGCCGCGTGAAGGATGAAGT  
TTTTCGGAATGTAAACTTCGTAAGAATAGGAAGAATAAATGACGGTACTATTTGTAAGGT  
CCGGCTAACTACGTG

>300 len=156 tot-seq=446

TGAGGAATATTGGTCAATGGGCGTAAGCCTGAACCAGCCAAGTAGCGTGTAGGAATACAG  
CCCTATGGGTTTTAACTACTTTTGTAGGGAATAAAGTGTGCCACGTGTTGGCATATTG  
CATGTACCTATCGAATAAGGACCGGCTAATCCGTG

>301 len=160 tot-seq=437

TAGGGAATCTCCGCAATGGACGAAAGTCTGACGGAGCAACGCCGCGTGAGTGATGAAGG  
CCTTCGGGTCGTAAACTCTGTTGTTAGGGAAGAACAAGTACAAGAGTAACTGCTTGAC  
CTTGACGGTACCTAACCAGAAAGCCACGGCTAACTACGTG

>302 len=159 tot-seq=430

TGGGGAATTTTGGACAATGGGGGCAACCCTGATCCAGCCATGCCGCGTGCAGGATGAAGG  
TCTTCGGATTGTAAACTGCTTTTGTGAGGGACGAAAAGGGATGCGATAACACCGCATTCC  
GCTGACGGTACCTGAAGAATAAGCACCGGCTAACTACGT

>303 len=155 tot-seq=422

TGGGGAATATTGGACAATGGGGCGAAAGCCTGATCCAGCAATTCCGCGTGTGTGAAGAAGG  
CCTTCGGGTTGTAAAGCACTTTAGTGAGGGAAGAAACAGCTTGCCACACCAAGCCTTGA  
CGGTACCTCAAGAATAAGCACCGGCTAACTCTGTG

>304 len=156 tot-seq=421

TGAGGAATATTGGTCAATGGGCGTAAGCCTGAACCAGCCAAGTCGCGTGAGGGAAGACGG  
TCCTACGGATTGTAAACCTCTTTTGCCGGGGAGCAACGGGGTCTTGCGAGGGCCTTATG  
AGAGTACCCGGAGAAAAGCATCGGCTAACTCCGTG

>305 len=160 tot-seq=420

TGGGGAATTTTGGACAATGGGGCGCAAGCCTGATCCAGCCATGCCGCGTGTCTGAAGAAGG  
CCTTCGGGTTGTAAAGGACTTTTGTGCGGGGAAGAAAAGGCTGTTGCTAATATCAGCGGCT  
AATGACGGTACCCGAAGAATAAGCACCGGCTAACTACGTG

>306 len=155 tot-seq=415

TAGGGAATTTTCGGCAATGGGGGCAACCCTGACCGAGCAACGCCGCGTGAGTGAAGACGG  
CCTTCGGGTTGTAAAGCTCTGTTGTAAGGGAAGAACGGTAGATAGAGAATATCTAAGTGA  
CGGTACCTTACCAGAAAGCCACGGCTAACTACGTG

>307 len=160 tot-seq=411

TGGGGAATTTTGGACAATGGGGGCAACCCTGATCCAGCAATGCCGCGTGTGTGAAGAAGG  
CCTTCGGGTTGTAAAGCACTTTTGTCCGAAAGAAATCGCACTTACTAATATTAGGTGTG  
GATGACGGTACCCGAAGAATAAGGACCGGCTAACTACGTG

>308 len=135 tot-seq=411

TGGGGAATATTGCACAATGGGGGAAACCCTGATGCAGCGACGCCGCGTGAGTGAAGAAGT  
GATTCGTCACGTAAAGCTCTATCAGCAGGAAAGAAAATGACGGTACCTGACTAAGAAGCC  
CCGGCTAACTACGTG

>309 len=145 tot-seq=410

AAGTCCTGTAGACCGCAGAAACCCAGGATGGCTGCATGGAGAAGAGGAGGAATCACCATG

CCTCTCCCACTTCATTCCCCTAATTAAGGTCAGCTCAGAACCAGAAGGAACTTCTCCCTG  
TGGAGGAAAGGTAAAAAAGAGGACC

>310 len=135 tot-seq=408

TGGGGAATATTGCACAATGGGGGAAACCCTGATGCAGCAACGCCGCGTGAAGGAAGACGG  
TTTTCGGATTGTAACTTCTGTTCTTAGTGAAGAATAATGACGGTAGCTAAGGAGCAAGC  
CACGGCTAACTACGT

>311 len=157 tot-seq=406

TAGGGAATCTTCCGCAATGGACGAAAGTCTGACGGAGCAACGCCGCGTGAGTGATGACGG  
TCTTCGGATTGTAAAGCTCTGTTAATCGGGACGAATGGTTTGTGTGCAAATAGTGCATAG  
ACATGACGGTACCGGAATAGAAAGCCACGGCTAACTA

>312 len=155 tot-seq=406

TGAGGAATATTGGTCAATGGACGAGAGTCTGAACCAGCCAAGTAGCGTGAAGGATGACTG  
CCCTATGGGTTGTAACTTCTTTTATATGGGAATAAAACAGGGTATGCATACCCTCTTGT  
ATGTACCATATGAATAAGGATCGGCTAACTCCGTG

>313 len=160 tot-seq=405

TGGGGAATCTTCCGCAATGGGCGAAAGCCTGACGGAGCAACGCCGCGTGAGTGATGACGG  
CCTTCGGGTTGTAAACTCTGTGATCCGGGACGAAAAGGCAGAGTGCGAAGAACAACAACTG  
CATTGACGGTACCGGAAAAGCAAGCCACGGCTAACTACGT

>314 len=135 tot-seq=403

TGGGGAATATTGCACAATGGGGGAAACCCTGATGCAGCGACGCCGCGTGAGCGAAGAAGG  
TATTCGTATCGTAAAGCTCTGTCCTATGGGAAGATAATGACGGTACCATAGGAGGAAGCT  
CCGGCTAACTACGTG

>315 len=160 tot-seq=398

TAGGGAATTTTCGTCAATGGAGGGAACCTCTGAACGAGCAATGCCGCGTGAGTGAAGAAGG  
TCTTCGGATCGTAAAGCTCTGTTGTAAGAGAAAAACGGCACATAGAGGAAATGATATGTG  
AGTGATGGTATCTTACCAGAAAGCCACGGCTAACTACGTG

>316 len=159 tot-seq=394

TGGGGAATATTGCACAATGGGCGCAAGCCTGATGCAGCCATGCCGCGTGTGTGAAGAAGG  
CCTTCGGGTTGTAAAGCACTTCAGCGAGGAGGAAGGCCAGTGACTTAATAAGTGACTGG

ATTGACGTTACTCGCAGAAGAAGCACCGGCTAACTCCGT

>317 len=131 tot-seq=387

ACACTCAAATTACCCACTCTGACACGGGAGGTAGTGACAAAAATAACAATACAGGACT  
CTTCAAGGCCCTGTAATTGGAATGAGTCCACTTTAAATCTTTAATGAGGATCCATTGG  
AGGGAAAGTCT

>318 len=156 tot-seq=384

TGAGGAATATTGGTCAATGGGCGAGAGCCTGAACCAGCCAAGTCGCGTGAAGGAAGACGG  
TTCATAAGGATTGTAACTTCTTTTGTAGAGGGGTAAAGGTGCGTACGTGTACGCATTTG  
CAAGTACTCTACGAATAAGTATCGGCTAACTCCGTG

>319 len=135 tot-seq=382

TAGGGAATCTTTCACAATGGGCGAAAGCCTGATGGAGCAACGCCGCGTGCAGGATGAAGG  
CCTTCGGGTTGTAACTGCTTTTATAAGCGAGAAATATGATGGTAACTTATGAATAAGGA  
TCGGCTAACTACGTG

>320 len=155 tot-seq=375

TGAGGAATATTGGTCAATGGCCGAGAGGCTGAACCAGCCAAGTCGCGTGAGGGATGACGG  
CCCTACGGGTTGTAAACCTCTTTTGTGCGGGGAGCAAAGAGAGTCACGTGTGACTCATTGA  
GAGTACCCGAAGAAAAAGCATCGGCTAACTCCGTG

>321 len=138 tot-seq=373

TGGGGAATATTGCGCAATGGGGGAAACCCTGACGCAGCAACGCCGCGTGCAGGAAGAAGG  
TCTTCGGATTGTAACTGTTGTCGCAGGGGAAGAAGACAGTGACGGTACCCTGTGAGAAA  
GTCACGGCTAACTACGTG

>322 len=160 tot-seq=371

TGGGGAATATTGCACAATGGGCGCAAGCCTGATGCAGCCATGCCGCGTGTGTGAAGAAGG  
CCTTCGGGTTGTAAAGCACTTTCAGCGAGGAGGAAGGTGGTGAACCTAATACGTTTCATCA  
ATTGACGTTACTCGCAGAAGAAGCACCGGCTAACTCCGTG

>323 len=160 tot-seq=371

TAGGGAATCTTCCGCAATGGACGAAAGTCTGACGGAGCAACGCCGCGTGAACGAAGAAGG  
CCTTCGGGTCGTAAAGTTCTGTTGTTAGGGAAGAACAAGTACCAGAGTAACTGCTGGTAC  
CTTGACGGTACCTAACCAGAAAGCCACGGCTAACTACGTG

>324 len=161 tot-seq=369

TGGGGAATCTCCGCAATGGGCGAAAGCCTGACGGAGCAATGCCGCGTGAGTGAAGAAGG  
CCTTCGGGTTGTAAACTCTGTCTTATCGAAGAGAGGTAGGTATGTGAATAATGTACCT  
ATAGGACGGTAGATAAGGAGGAAGCCCCGGCTAACTACGTG

>325 len=135 tot-seq=368

TGAGGAATCTCCACAATGGGCGAAAGCCTGATGGAGCAACGCCGCGTGCAGGATGAAGG  
CCTTAGGGTTGTAAACTGCTTTTATAAGTGAAGAATTTGACGGTAACTTATGAATAAGCA  
CCGGCTAACTACGTG

>326 len=160 tot-seq=366

TAGGGAATCTCCACAATGGACGCAAGTCTGATGGAGCAACGCCGCGTGTATGAAGAAGG  
CCTTCGGGTTGTAAAGTACTTTTACGCGGGGAGGAAGGGAGTAAAGTTAATACCTTTGCTC  
ATTGACGTTACCCGCAGAAGAAGCACCGGCTAACTCCGTG

>327 len=161 tot-seq=365

TGGGGAATCTCCGCAATGGACGAAAGTCTGACGGAGCAACGCCGCGTGAGTGATGAAGG  
ATTCGGTCTGTAAAGCTCTGTTGTTTATGACGAACGTGCAGTGTGTGAACAATGCATTG  
CAATGACGGTAGTAAACGAGGAAGCCACGGCTAACTACGTG

>328 len=142 tot-seq=360

TGGGGAATATTGCACAATGGGCGCAAGCCTGATGCAGCGACGCCGCGTGGGGGATGACGG  
CCTTCGGGTTGTAAACTCCTTCGCAACTGACGAAGCTTTTGTGTGACGGTAGGTTGAGA  
AGAAGCACCGGCTAACTACGTG

>329 len=155 tot-seq=359

TGAGGAATATTGGTCAATGGGCGCGAGCCTGAACCAGCCAAGTCGCGTGAGGGAAGACGG  
TCCTATGGATTGTAAACCTCTTTTGTGCGGGGAGCAAAAGACGCCACGCGTGCCGTTCCGA  
GAGTACCCGAAGAAAAGCATCGGCTAACTCCGTG

>330 len=155 tot-seq=356

TGAGGAATATTGGTCAATGGACGCAAGTCTGAACCAGCCATGCCGCGTGCAGGAAGACGG  
CTCTATGAGTTGTAAACTGCTTTTGTACTAGGGTAAACGCTCCTACGTGTAGGAGTCTGA  
AAGTATAGTACGAATAAGGATCGGCTAACTCCGTG

>331 len=160 tot-seq=354

TGGGGAATTTTGGACAATGGGCGAAAGCCTGATCCAGCCATGCCGCGTGCAGGATGAAGG  
CCTTCGGGTTGTAAACTGCTTTTGTACGGAACGAAAAGGCTCTTTCTAATAAAGAGGGCT  
CATGACGGTACCGTAAGAATAAGCACCGGCTAACTACGTG

>332 len=135 tot-seq=353

TCGGGAATATTGCGCAATGGAGGAAACTCTGACGCAGTGACGCCGCGTATAGGAAGAAGG  
TTTTCGGATTGTAAACTATTGTCGTTAGGGAAGAAAAAGACAGTACCTAAGGAGGAAGCT  
CCGGCTAACTATGTG

>333 len=200 tot-seq=346

TAGGGAATTTTTACAATGGGCGCAAGCCTTATGAAGCAATGCCGCGTGAACGATGAAGG  
TCTTATAGATTGTAAAGTTCTTTTATATGGGAAGAAACGCTAAGATAGGAAATGATTTTA  
GTTTGACTGTACCATTGAATAAGTATCGGCTAACTATGTGCCAGCAGCCGCGGTAATAA  
GAAGATCGGAAGAGCGTCGT

>334 len=210 tot-seq=346

TGAGGAATATTGGTCAATGGGCGCGAGCCTGAACCAGCCAAGTAGCGTGCAGGACGACGG  
CCCTATGGGTTGTAAACTGCTTTTATACGGGGATAAAGTATGCCACGTGTGGTTTATTGC  
AGGTACCGTATGAATAAGGACCGGCTAATTCCGTGGGGGGAGCCGGTTCAGAGATCGGA  
AGATCGTCGTGTAGGGAAAGAGTGTGCCAA

>335 len=159 tot-seq=340

TAGGGAATCTTCCACAATGGGTGCAAACCTGATGGAGCAATGCCGCGTGAGTGAAGAAGG  
TCTTCGGATCGTAAAGCTCTGTTGTTAGAGAAGAACACGTGCTAGGTAACACTAGCGCC  
TTGACGGTATCTAACCAGAAAGTCACGGCTAACTACGTG

>336 len=134 tot-seq=335

TTGGGGAATATTGCACAATGGGGGAAACCCTGATGCAGCGACGCCGCGTGGGTGACGAAG  
TATTTTCGGTATGTAAAGCCCTATCAGCAGGGAAGAAGATGACAGTACCTGACTAAGAAGC  
CCCGGCTAACTACG

>337 len=135 tot-seq=333

TGGGGAATATTGCACAATGGGGGAAACCCTGATGCAGCGACGCCGCGTGAAGGAAGAAGT  
ATCTCGGTATGTAAACTTCTATCAGCAGGGAAGATAGTGACGGTACCTGACTAAGAAGCC  
CCGGCTAACTACGTG

>338 len=215 tot-seq=329

TGGGGAATATTGCACAATGGGGGAAACCCTGACGCAGCGACGCCGCGTGCGGGATGAAGG  
CCTTCGGGTTGTAAACCGCTTTTGATTGGGAGCAAGCTTTCGGGTGAGTGTACCTTTCGA  
ATAAGCGCCGGCTAACTACGTGGGGGGAGCCGCGGTAATAAAGAGATCGGAAGGCGTCGT  
GTAGGGAAAGAGTGTGCCAATGTGTAGATCTCGGT

>339 len=155 tot-seq=327

TGAGGAATATTGGTCAATGGGCGAGAGCCTGAACCAGCCAAGTCGCGTGAAGGATGAAGG  
ATCTATGGTTCGTAAACTTCTTTTATATGGGAATAAAGTGCAGGACGTGTCCTGTTTTGT  
ATGTACCGTATGAATAAGGATCGGCTAACTCCGTG

>340 len=135 tot-seq=326

TGGGGAATATTGCACAATGGGGGAAACCCTGATGCAGCGACGCCGCGTGAGCGAAGAAGG  
TTTTCGAATCGTAAAGCTCTGTCCTATGAGAAGATAATGACGGTATCATAGGAGGAAGCC  
CCGGCTAAATACGTG

>341 len=135 tot-seq=326

TGAGGAATATTGGGCAATGGAGGCAACTCTGACCCAGCCATGCCGCGTGAGTGAAGAAGG  
TTTTCGGATTGTAAAGCTCTTTCGGATGTGACGATGATGACGGTAGCATCTAAAGAAGCC  
CCGGCTAACTTCGTG

>342 len=154 tot-seq=322

TGAGGAATATTGGTCAATGGGCGGGAGCCTGAACCAGCCAAGCCGCGTGAGGGAATAAGG  
CCCTATGGGTCGTAAACCTCTTTTGTGCGGGAAACAAAAGCGGGGACGCGTCCCCGTCTGC  
GTGTACCCGAAGAAAAAGCATCGGCTAACTCCGT

>343 len=135 tot-seq=320

TGGGGAATATTGCACAATGGGGGAAACCCTGATGCAGCGACGCCGCGTGAAAGGACGACGT  
ATTCGGTATGTAAACTTCTATCAGCAAGGAAGATGATGACGGTACTTGACTAAGAAGCC  
CCGGCTAACTACGTG

>344 len=135 tot-seq=316

TGGGGAATATTGACAATGGGCGAAAGCCTGATCCAGCAATGCCGCGTGAGTGAAGAAGG  
CCTTCGGGTTGTAAAGCTCTTTTACCCGGGAAGATAATGACTGTACCGGGAGAATAAGCC  
CCGGCTAACTCCGTG



>345 len=160 tot-seq=316

TGGGGAATTTTGGACAATGGGGGCAACCCTGATCCAGCCATGCCGCGTGCAGGATGAAGG  
TCTTCGGATTGTAAACTGCTTTTGTTCAGGGAAGAAACGCAACGGGTCAACAACCCGTTGT  
AATGACGGTACCTGAAGAATAAGCACCGGCTAACTACGTG

>346 len=212 tot-seq=313

TCCAGGTGGTGCAGGGACGACGGACCCCATCTTCCCATCAGCAACATGCCGCTGCAGAG  
GCCTCACCCCCCGGGTGAGGAGGCTCAGGAAGGCCACGGCAGCCTGGCCGTGCATCC  
CCAGACTCTCGTCCGCCCTTTGTCTGCCTGGCGTTCTGGGTGGGCATGCGCAGCGAG  
GCTGGCCACCGCCAGCAGTTCTTCCTGCAGG

>347 len=160 tot-seq=311

TGGGGAATTTTGGACAATGGGCGCAAGCCTGATCCAGCCATGCCGCGTGCAGGGAAGAAGG  
CCTTCGGGTTGTAAACCGCTTTTGTTCAGGGAAGAAAAGGTTCTGGCTAATACCTGGGACT  
CATGACGGTACCTGAAGAATAAGCACCGGCTAACTACGTG

>348 len=136 tot-seq=310

TAGGGAATTTTGCACAATGGGCGAAAGCCTGACGCAGCAACGCCGCGTGATTGATAAAGC  
CCTTCGGGGTGTAAAGATCTGTTCAGTGGGGACGAACTTGACGGTACCCACAGAGGAAGC  
ACCGGCTAACTCCGTG

>349 len=160 tot-seq=306

TGGGGAATTTTGGACAATGGGGGCAACCCTGATCCAGCCATGCCGCGTGAGTGAAGAAGG  
CCTTCGGGTTGTAAAGCTCTTCGGCCGGGAAGAAATCGCATAGGCTAATACCCTGTGTG  
GATGACGGTACCGGAATAAGAAGCACCGGCTAACTACGTG

>350 len=161 tot-seq=306

TTAGGGAATCTTCCACAATGGACGCAAGTCTGATGGAGCAACGCCGCGTGAGTGAAGAAG  
GTTTTCGGATCGTAAAGCTCTGTTGTTGGAGAAGAACGTGCGTGAGAGTAACTGTTACAG  
CAGTGACGGTATCCAACCAGAAAGTCACGGCTAACTACGTG

>351 len=160 tot-seq=304

TAGGGAATTTTCGTCATGGGGGGAACCCTGAACGAGCAATGCCGCGTGAGTGAAGAAGG  
CCTTCGGGTCGTAAAGCTCTGTTGTAAGTGAAGAACGGTACTGACAGGGAATGGTCAGTA  
AGTGACGGTAGCTTACCAGAAAGCCACGGCTAACTACGTG

>352 len=153 tot-seq=303

TGAGGAATATTGGTCAATGGACGAGAGTCTGAACCAGCCAAGTAGCGTGAAGGATGACTG  
CCCTATGGGTTGTAAACTTCTTTTATATGGGAATAAAGTGAGCCACGTGTGGCTTTTTGT  
ATGTACCATACGAATAAGGATCGGCTAACTCCG

>353 len=159 tot-seq=301

TAGGGAATCTCCGCAATGGGCGAAAGCCTGACGGAGCAACGCCGCGTGAGTGAAGAAGG  
ATTTTCGGTTCGTAAAGCTCTGTTGTTAGGGAAGAATGGATATGTAGTAACTATACATATA  
AGAGACGGTACCTAACAGAAAGCCACGGCTAACTACGT

>354 len=154 tot-seq=300

TGAGGAATATTGGTCAATGGCCGAGGGCTGAACCAGCCAAGTCGCGTGAGGGATGACGG  
TCCTATGGATTGTAAACCTCTTTTGTGAGGGAGCAAAGGGCGCCACGTGTGGCGTTTTGC  
GAGTACCTGAAGAAAAGCATCGGCTAACTCCGT

>355 len=160 tot-seq=298

TGGGGAATATTGGACAATGGGGGCAACCCTGATCCAGCCATGCCGCGTGTGTGAAGAAGG  
CCTTTTGGTTGTAAAGCACTTTAAGCAGGGAGGAGAGGCTAATGGTTAATACCCATTAGA  
TTAGACGTTACCTGCAGAATAAGCACCGGCTAACTCTGTG

>356 len=199 tot-seq=297

GGATGGGGAAGCTATAGCCCTTGGGACTTGTAGAAAAAAGGGAAGCAGGATCTAAGAGA  
AAGGAGAAATTATTTGGTAGGAAAGGACAGAGACATTTCTGAGGTGGATAAAACAAGTCT  
TAATGCTTTGCAACTCTTTCCCCCTCCTGGGAACCTGTGACCTGTACCATCCTGCAAGC  
TGTTGTGTTGCCTAGGTGA

>357 len=153 tot-seq=296

TGAGGAATATTGGTCAATGGACGAGAGTCTGAACCAGCCAAGTAGCGTGAAGGATGAAGG  
TCCTACGGATTGTAAACTTCTTTTATAAGGGAATAAACCTCCCACGTGTGGGAGCTTGT  
ATGTACCTTATGAATAAGCATCGGCTAACTCCG

>358 len=135 tot-seq=294

TGGGGGATATTGCACAATGGGGGAAACCCTGATGCAGCAACGCCGCGTGAGGGAAGAAGG  
TTTTTCGGATTGTAAACCTCTGTTCTTAGTGACGATAATGACGGTAGCTAAGGAGAAAGCT  
CCGGCTAACTACGTG

>359 len=135 tot-seq=294

TGGGGAATATTGCGCAATGGGGGCAACCCTGACGCAGCAACGCCGCGTGCGGGACGACGG  
CCTTCGGGTTGTAAACCGCTTTCAGCAGGGAAGATAGTGACGGTACCTGCACAAGAAGCC  
CCGGCTAACTACGTG

>360 len=140 tot-seq=294

TGGGGAATATTGCACAATGGGCGAAAGCCTGATGCAGCGACGCCGCGTGAGGGATGACGG  
CCTTCGGGTTGTAAACCTCTTTCAGCACGGAAGAAGCGAAAGTGACGGTACGTGCAGAAG  
AAGCGCCGGCTAACTACGTG

>361 len=205 tot-seq=291

CCAAGGCTCTGCAGGGTAACCCAGAGCCCTTGGTCTGCAACGTCCGGGGAAGTGTGTGT  
CCTGGGCGTTCATGTGCCTGTGCACTCTTCTCACGTGTATCCGTCTTTTTGTTCCCTC  
TCATGTTTGTAGGGCATTGTTGATTGTTTATATCCTATGTATGGTGCAGTGGCTGAAGA  
GTGGCCTCTCAAAGATATGTCCAC

>362 len=155 tot-seq=291

TGAGGAATATTGGTCAATGGGCGGAAGCCTGAACCAGCCAAGTCGCGTGAGGGAAGACGG  
CCCTACGGGTTGTAAACCTCTTTTGCCGGGGAGCAAAGGCGGGTATGTATACCCGGATGA  
GAGTACCCGGAGAAAAGCATCGGCTAACTCCGTG

>363 len=161 tot-seq=291

TAGGGAATCTCCGCAATGGGCGAAAGCCTGACGGAGCAACGCCGCGTGAGTGAAGAAGG  
TTTTCGGATCGTAAAGCTCTGTTGTAAGAGAAGAACGAGTGTGAGAGTGGAAAGTTCACA  
CTGTGACGGTATCTTACCAGAAAGGGACGGCTAACTACGTG

>364 len=135 tot-seq=288

TGGGGAATATTGCACAATGGGGGAAACCCTGATGCAGCGACGCCGCGTGAGCGAAGAAGG  
CCTTCGGGTCGTAAAGCTCTTTTATGAGGGAAGATAATGACGGTACCTCAAGAAAAAGCC  
CCGGCTAACTACGTG

>365 len=135 tot-seq=288

TGGGGAATATTGCACAATGGGGGAAACCCTGATGCAGCGACGCCGCGTGGAGGAAGAAGG  
TCTTCGGATTGTAACTCCTGTCCAGGGGACGATAATGACGGTACCTGGGAGGAAGCA  
CCGGCTAACTACGTG

>366 len=152 tot-seq=288

TGGGGAATATTGCACAATGGGCGAAAGCCTGATGCAGCGACGCCGCGTGAGGGATGGAGG  
CCTTCGGGTTGTAAACCTCTTTCGCTCATGGTCAAGCCGCAACTGTGGTTGTGGTGAGGG  
TAGTGGGTAAAGAAGCGCCGGCTAACTACGTG

>367 len=155 tot-seq=287

TGAGGAATATTGGTCAATGGGCGAGAGCCTGAACCAGCCAAGTAGCGTGCAGGATGACGG  
CCCTATGGGTTGTAACTGCTTTTATGCGGGGATAAAGTGAGGGACGTGTCCTTCATTGC  
AGGTACCGCATGAATAAGGACCGGCTAATTCCGTG

>368 len=135 tot-seq=284

GCGCGCAAATTACCACTCCCGACCCGGGGAGGTAGTGACGAAAATAACAATACAGGAC  
TCTTTCGAGGCCCTGTAATTGGAATGAGTCCACTTTAAATCCTTCCGCGAGGATCCATTG  
GAGGGCAAGTCTGGT

>369 len=159 tot-seq=284

TAGGGAATCTTCGGCAATGGACGGAAGTCTGACCGAGCAACGCCGCGTGAGTGAAGAAGG  
TTTTCGGATCGTAAACCTGTTGTTAGAGAAGAAAGTGCGTGAGAGTAACTGTTACAGT  
TTCGACGGTATCTAACCAGAAAGCCACGGCTAACTACGT

>370 len=135 tot-seq=282

TGGGGGATATTGCACAATGGGGGCAACCCTGATGCAGCGACGCCGCGTGAGCGATGGAGT  
ACTCCGGTATGTAAAGCTCTGTCAGCAGGGAAGAGAATGACGGTACCTGACCAAGAAGCC  
CCGGCTAAATACGTG

>371 len=131 tot-seq=282

CCCCCGCCTGTGGCAATCTCTGTCTCCCTCTGGTGGTTAAGCTCTCAAATTACAGGTG  
TTCTTTGTAAGTGACTIONATACATTCCAGTACCGGGGTGAGTTTTTACTCTTTTGGCTCAT  
GTCATTTCTC

>372 len=201 tot-seq=281

TAGGGAATCTTCCACAATGGGCGAAAGCCTGATGGAGCAACGCCGCGTGGGTGAAGAAGG  
TCTTCGGATCGTAAACCTGTTGTTAGAGAAGAAAGTGCGTGAGAGTAACTGTTACAGT  
TTCGACGGTATCTAACCAGAAAGCCACGGCTAACTACGTGCCAGCAGCCGCGGTAATACA  
AAGATCGGAAGAGCGTCGTG

>373 len=211 tot-seq=279

GGGTGTGGGGGGGATTTAGTGATCCACTTCTAGCAAACAGAATAAAGTGGAAATGATGGC  
ATGTGACTCCCAAGACTAGGTCCAAAGCTTTGACTTTGCTGTCTGTCTTGGATCACGCAC  
TCTGGGGAAAGAGTTGCCATGTCATGAGGATGCTCAAGCAAGCCCAAGGAGAGGGTCCCG  
TCGACAGAAAACAAAGCCCTGAGGCCTCTTG

>374 len=125 tot-seq=275

AACCTCAAAGGAAAAGTGCCAGTGTGTGTAGACCTGGCCGGGTTCCAAGCCGTTCTGCCC  
CCACTGCCTGTGTGTACCTGGAGCAAGCCATGGTGCTTCTCCAAGAACGGGGTGATCAG  
GTGTG

>375 len=213 tot-seq=273

GTGAGTCAAGAAGTATTTCAAAGGCAGGTCACAATTGCTGTTTGTTCATCTTGCAATGTGA  
AGGTCAGGAGACAGAAGAAGGTGGGAGGAAGCAGAGAAAAGACCTGCTTGCAAGCAGATC  
AACCATAGCCAGACAGGTCCTGCTCCATGGCTCTGACAGTGCCCAGGGAGCCCATGTAAT  
TACTGCCTGAACTGACATCTGAGGCTTTCACCT

>376 len=156 tot-seq=272

TGAGGAATATTGGTCAATGGGCGAGAGCCTGAACCAGCCACGTCGCGTGAAGGAAGACTG  
ACCTTACGGTTTGTAAACTTCTTTTGTAGAGGGGTAATAGCAGATACGTGTATTTGCGTG  
AAAGTACTCTACGAATAAGCATCGGCTAACTCCGTG

>377 len=154 tot-seq=271

TGAGGAATATTGGTCAATGGGCGAGAGCCTGAACCAGCCAAGTCGCGTGAGGGAGTACTG  
CCCTATGGGTTGTAAACCTCTTTTGTGCGGGGAGCAAAGCCGGACGTGTCCGTCTGTGAG  
AGTACCCGAAGAAAAAGCATCGGCTAACTCCGTG

>378 len=155 tot-seq=270

TTCATATTTCAAGTCAATTGTTTCAGCCTTATCTAGCCAGTGTGGAATCTGCACCACACA  
TGAAGTTCAAAGTCCAGCTTAGATTTAGGTAGATTTTATACATGGAATTTGGGGCTCCAC  
TCTGTGGCTCACTCCTTTCAGAGACCCCACTCCTT

>379 len=136 tot-seq=270

GCATGCAAATTACCCACTCCCTACTCGGGGAGGTAGTGATGAAAAATAACAATACAGGAC  
TCTTTCGAGGCCCTGTAATTGGAATGAGTCCACTTTAAATCCTTTAACGAGGATCCATTG

GAGGGCAAGTCTGGTG

>380 len=154 tot-seq=269

TGAGGAATATTGGTCAATGGCCGAGAGGCTGAACCAGCCAAGTCGCGTGAAGGAAGAAGG  
ATCTATGGTTTGTAACCTTCTTTATAGGGGAATAAAGTGGAGGACGTGTCCTTTTTTGT  
ATGTACCCTATGAATAAGCATCGGCTAACTCCGT

>381 len=136 tot-seq=267

ACATGCAAATTACCCACTCTGACACGGGGAGGTAGTGACGAAAAATAACAATACAGGAC  
TCTTCGAGGCCCTGTAATTGGAATGAGTCCACTTTAAATCTTTAATGAGGATCCATTG  
GAGGGCAAGTCTGGTG

>382 len=181 tot-seq=267

TGGGGGATATTGGACAATGGGGGAAACCCTGATCCAGCGATGCCGCGTGAGGGAAGAAGG  
TTTTCGGATTGTAAACCTCTGTGGACAGGGACGATAATGACGGTACCTGTTTAGAAAGCC  
ACGGCTAACTACGTGGGGGGAGCCGCGGAATACAGAGATCGGAAGAGGGGGGTGTAGGGA  
A

>383 len=155 tot-seq=266

TGAGGAATATTGGTCAATGGGCGGGAGCCTGAACCAGCCAAGTAGCGTGAAGGATGACAG  
CCCTATGGGTTTTAACTTCTTTATAAGGGAATAAAGTGCCCCACGTGTGGGGTTTTGT  
ATGTACCTTATGAATAAGCATCGGCTAATTCCGTG

>384 len=190 tot-seq=264

TGGGGAATTTTGCACAATGGGCGCAAGCCTGATGCAGCGACGCCGCGTGAGGGATGAAGG  
CCTTCGGGTTGTAAACCTTTTCGCTCATGGTCAAGCCGACGCTTTGGGTTGTGGTGAGG  
GTAGTGGGTAAAGAAGCGCCGGCTAACTACGTGGGGGGCAGCGGGGAATCCCGAGATCGG  
AAGAGCGTCG

>385 len=156 tot-seq=263

TGAGGAATATTGGTCAATGGGCGAGAGCCTGAACCAGCCAAGTCGCGTGAAGGAAGACGG  
TTCATAAGGATTGTAACTTCTTTGCAGAGGAGTAACGATAGGCACGTGTGCCTGTGTG  
AACGTA CTCTGCGAATAAGTATCGGCTAACTCCGTG

>386 len=142 tot-seq=260

TAGGGAATTTTCGGCAATGGGGGGAACCCTGACCGAGCAACGCCGCGTGAACGAAGAAGT

AATTCGTTATGTAAAGTTCTTTTATTGGGGAAGAAAGCGCAAGTTGACGGTACCCAAGGA  
ATAAGCTCCGGCTAACTACGTG

>387 len=136 tot-seq=259

TGGGGGATATTGGACAATGGGGGGAACCCTGATCCAGCGACGCCGCGTGAGTGAAGAAGT  
ATCTCGGTATGTAAAGCTCTATCAGCAGGGAAGAAAGAAATGACGGTACCTGAGTAAGAA  
GCCCCGGCTAACTACG

>388 len=177 tot-seq=259

GTAGGAACAGACAATGCGAAGGCCCTCACTGGGCTCACATTTACCCCTTGACATCCGTC  
TTTGCCCTAGCTTTACCCCTGTGATGTGGGGACATGGTATGGCAATCTGGAGGCCATGAG  
GATTAACCCTTAGTGATTGACAGAAGGTGGCAGGCTCCCAGGTTTTCTTTTGCCT

>389 len=205 tot-seq=259

TGGGGAATATTGGACAATGGGGGGAACCCTGATCCAGCCATGCCGCGTGTGTGAAGAAGG  
CCTTATGGTTGTAAAGCACTTTAAGCGAGGAGGAGGCTACTGAGACTAATACTCTTGGAT  
AGTGGACGTTACTCGCAGAATAAGCACCGGCTAACTCTGTGGGGGGAGCCGCGGAATTCA  
CAGATCGGAAGAGCGTCGTGTATGG

>390 len=135 tot-seq=258

TGGGGAATATTGCACAATGGGGGAAACCCTGATGCAGCAACGCCGCGTGAGTGATGAAGG  
TCTTCGGATCGTAAAGCTCTGTCTTCAGGGACGATAATGACGGTACCTGAGGAGGAAGCC  
ACGGCTAACTACGTG

>391 len=138 tot-seq=252

TGGGGAATATTGGGCAATGGGCGCAAGCCTGACCCAGCAACGCCGCGTGAAGGAAGAAGG  
CCTTCGGGTTGTAAACTTCTTTTCTTAGGGACGAAGAAAGTGACGGTACCTAAGGAATAA  
GCCACGGCTAACTACGTG

>392 len=135 tot-seq=250

TGGGGAATATTGGACAATGGGCGAAAGCCTGATCCAGCCATGCCGCGTGAGTGATGAAGG  
CCCTAGGGTTGTAAAGCTCTTTCAACGGTGAAGATAATGACGGTAACCGTAGAAGAAGCC  
CCGGCTAACTTCGTG

>393 len=161 tot-seq=250

TGGGGAATATTGCGCAATGGGGGAAACCCTGACGCAGCGACGCCGCGTGAGTGAAGAAGG

TCTTCGGATTGTAAAGCTCTGTTATACGGGACGAAAAAGACGGATGCCAACAGTATCCGT  
CCGTGACGGTACCGTAAGAGAAAGCCACGGCTAACTACGTG

>394 len=197 tot-seq=248

TGGGGAATATTGCACAATGGGCGCAAGCCTGATGCAGCGACGCCGCGTGAGGGATGGAGG  
CCTTCGGGTTGTAAACCGCTTTTGATTGGGAGCAAGCTTTCGGGTGAGTGTACCTTTCGA  
ATAAGCGCCGGCTAACTACGTGGGGGGCCCGCGTAATGATAAGATCGGAAGAGCGTCGT  
GTAGGGAAAGAGTGGGC

>395 len=155 tot-seq=248

TGAGGAATATTGGTCAATGGGCGGAAGCCTGAACCAGCCAAGTCGCGTGAGGGAAGAAGG  
CCCTGCGGGTCGCAGACCTCTTTGGACGGGGAGCAAGGCCCGACGTGTCGGCGGAAGG  
AGAGTACCCGTAGAACAAGCATCGGCTAACTCCGT

>396 len=160 tot-seq=245

TAGGGAATCTCCGCAATGGACGAAAGTCTGACGGAGCAACGCCGCGTGAGTGATGAAGG  
TTTTCGGATCGTAAACTCTGTTGTCAGGGAAGAACAAGTGCCGGAGTAACTGCCGGCAC  
CTTGACGGTACCTGACCAGAAAGCCACGGCTAACTACGTG

>397 len=135 tot-seq=243

TGGGGAATATTGCACAATGGAGGAAACTCTGATGCAGCGATGCCGCGTGAGGGAAGAAGG  
TTTTCGGATTGTAAACCTCTGTCTTAAGGGACGATAATGACGGTACCTTAGGAGGAAGCT  
CCGGCTAACTACGTG

>398 len=159 tot-seq=243

TGGGGAATCTCCGCAATGGGCGAAAGCCTGACGGAGCAACGCCGCGTGATCGAATGAAG  
GCCTTCGGGTTGTAAAGATCTGTTGACAGGGACGAATAAGCAATGCGAATAGTTTTGTGT  
ATGACGGTACCTGTTTAGAAAGCTCCGGCTAACTACGTG

>399 len=133 tot-seq=242

TGGGGGATATTGGACAATGGGGGCAACCCTGATCCAGCGACGCCGCGTGAGGGAAGAAGG  
TTTTCGGATTGTAAACCTCTGTTGACGGAGAAAAAATGATGGTATCCGTTTAGAAAGCC  
ACGGCTAACTACG

>400 len=240 tot-seq=238

CAGGAAATGTTTTAGAAATTCAGAAGCCAGAGCCATCAGGTGGGAGTTAGAACCAAAAAG



TGAGGGTTGCTCAGTGATAGATGGGACCACAGCCAGAAGAACCACTTGGGAGGACCTGGG  
TCATGAAGGAGACCAAGCTGCTGACCTGCCAGAAAAGTTGTCGAAGTAGGAAAAGAGGGG  
GCTCCTGGCTCTTCGTTTCCTTTCCAATCTTTTTCTACTAGTTGCTCCCCACTCGGAACC

>401 len=140 tot-seq=238

TGGGGAATATTGCACAATGGGCGGAAGCCTGATGCAGCGACGCCGCGTGGGGGATGAAGG  
CCTTCGGGTTGTAAACTCCTTTGACAGGGACGAAGCGTAAGTGACGGTACCTGTATAAG  
AAGCACCGGCTAACTACGTG

>402 len=155 tot-seq=237

TGAGGAATATTGGTCAATGGGCGAGAGCCTGAACCAGCCAAGTAGCGTGCAGGATGACGG  
CCCTATGGGTTGTAAACTGCTTTTGTATGGGGATAAAGTCAATCACGTGTGATTGTTTGC  
AGGTACCATACGAATAAGGACCGGCTAATTCCGTG

>403 len=196 tot-seq=237

CCGGGAAAGCCAGGGTGCCATCAAGCCAGCAGGGGAAGCAGCTCCAGCTGCAGTGAGACC  
CTTTACAGGTGGGGAGGGGCTCCCCACGAGGGCCAGGGGTGACTGCAGCCCCCTGCCCT  
GTTCCCGGAGGCAGCGGGGAGGGGGATGGGCAGCCCCCTCGGTTTCTTGAGCCCCCACCT  
GGATTGACTCCCCTC

>404 len=135 tot-seq=237

TGGGGAATATTGCACAATGGAGGAAACTCTGATGCAGCGATGCCGCGTGAGGGAAGAAGG  
TTTTAGGATTGTAAACCTCTGTCTTCAGGGACGATAAAAACGGTACCTGAGGAGGAAGCT  
CCGGCTAACTACGTG

>405 len=160 tot-seq=234

TAGGGAATCTCCACAATGGACGAAAGTCTGATGGAGCAACGCCGCGTGAGCGATGAAGG  
CCTTCGGGTCGTAAAGCTCTGTTGTTAGGGAAGAACAAGTGCGAGAGTAACTGCTCGCAC  
CTTGACGGTACCTAACCAGAAAGCCACGGCTAACTACGTG

>406 len=160 tot-seq=233

TGGGGAATCTCCGCAATGGGCGAAAGCCTGACGGAGCAATGCCGCGTGAGTGAAGAAGG  
CCTTCGGGTTGTAAACTCTGTCTTATCCAAGAGAGCAAGATGTAGTAACTGACATTTT  
GAGGACGGTAGATAAGGAGGAAGCCCCGGCTAACTATGTG

>407 len=155 tot-seq=230

TGAGGAATATTGGTCAATGGGCGAGAGCCTGAACCAGCCAAGTCGCGTGAAGGATGACTG  
CCCTATGGGTTGTAACTTCTTTTATGTGGGAATAAAAAAGGGAACGTGTTCCCTATTGC  
ATGTACCACTATGAATAAGCATCGGCTAACTCCGT

>408 len=138 tot-seq=228

TGGGGAATATTGGGCAATGGGCGAAAGCCTGACCCAGCAACGCCGCGTGAAGGAAGAAGG  
TCTTCGGATTGTAACTTCTTTTATCAGGGACGAAGTAAGTGACGGTACCTGATGAATAA  
GCCACGGCTAACTACGTG

>409 len=159 tot-seq=227

TGGGGAATATTGCACAATGGGCGCAAGCCTGATGCAGCCATGCCGCGTGTATGAAGAAGG  
CCTTCGGGTTGTAAAGTACTTTTTCAGTCGGGAGGAAGGTGGTAAGGTTAATAACCTTATCA  
ATTGACGTTACCGACAGAAGAAGCACCGGCTAACTCCGT

>410 len=145 tot-seq=226

CAGTAGTCTCTCAGTCACCAAACCCCAAACAAGAGGCAATTTGAAAGAGTGGAGGAAA  
CTTTTAGCAACCAATGTTCCCAAACACATAGATCTTTGACAGAAAGGTAGGTTTGCTAC  
CAAAGTAAAACGCTAGTTAGTAAGA

>411 len=135 tot-seq=226

TGAGGGATATTGGGCAATGGGGGCAACCCTGACCCAGCGACGCCGCGTGAAGGAAGACGG  
TCTTCGGATTGTAAACCTCTGTCTTTGGGGACGAAAAAGGACGGTACCCAAGGAGGAAGC  
TCCGGCTAACTACGT

>412 len=135 tot-seq=226

GCGCGCAAATTACCAATCCTGACACAGGGAGGTAGTGACAATAAATAACGATACAGGGC  
CCATTGGGTCTTGTAATTGGAATGAGTACAATGTAAATACCTAACGAGGAACAATTGG  
AGGGCAAGTCTGGTG

>413 len=153 tot-seq=225

ACAATTTAAAGTAGAATTACCTCCCCCCCCAAACAAAACAATATTGTAAGTTTGTAGAA  
ATACTGCTTTTGTAAAATAAATGTTTTGACAGTCAGTCTAACGATTTCAATCATGAATGA  
AGCACAATCACTCAGGAATCTGCCATTCACTCC

>414 len=161 tot-seq=225

TGGGGAATATTGGACAATGGGGGGAACCCTGATCCAGCCATGCCGCGTGTGTGAAGAAGG

CCTTTTGGTTGTAAAGCACTTTAAGTGGGGAGGAGGCTCTCTTGGTTAATACCTAAGAAG  
AGTGGACGTTACCCACAGAATAAGCACCGGCTAACTCTGTG

>415 len=156 tot-seq=224

TGAGGAATATTGGTCAATGGCCGGAAGGCTGAACCAGCCAAGTCGCGTGAGGGAATAAGG  
CCCTACGGGTCGTAAACCTCTTTTGCCAGGGAGCAATGCCGTCCACGTGTGGACGGAAGG  
AGAGTACCTGGAGAAAAAGCATCGGCTAACTCCGTG

>416 len=161 tot-seq=223

TAGGGAATCTTCCGCAATGGACGAAAGTCTGACGGAGCAACGCCGCGTGAGCGAAGAAGG  
TCTTCGGATCGTAAAGCTCTGTTGTTAGGGAAGAACAAGTACCGTTCAAATAGGGCGGTA  
CCTTGACGGTACCTAACCAGAAAGCCACGGCTAACTACGTG

>417 len=138 tot-seq=222

TGGGGAATATTGCACAATGGGGGAAACCCTGATGCAGCAACGCCGCGTGAAGGATGACGG  
TTTTCGGATTGTAAACTTCTTTTCTTAGTGACGAAGACAGTGACGGTAGCTAAGGAATAA  
GCATCGGCTAACTACGTG

>418 len=155 tot-seq=222

TGAGGAATATTGGTCAATGGTCGGGAGACTGAACCAGCCAAGCCGCGTGAGGGAAGAAGG  
TACAGCGTATCGTAAACCTCTTTTGCCGGGGAACAAGAGCTTCCACGAGTGGGAGTGTGA  
GCGTACCCGGAGAAAAAGCATCGGCTAACTCCGTG

>419 len=205 tot-seq=221

TGGGGAATATTGGACAATGGGCGGAAGCCTGATCCAGCCATGCCGCGTGTGTGAAGAAGG  
CCTTATGGTTGTAAAGCACTTTAAGCGAGGAGGAGGCTACTTTAGTTAATACCTAGAGAT  
AGTGGACGTTACTCGCAGAATAAGCACCGGCTAACTCTGTGCCAGCACCGCGTAATAAG  
AAGATCGGAAGAGCGTCGTGTATGG

>420 len=160 tot-seq=221

TGGGGAATATTGGACAATGGGCGAAAGCCTGATCCAGCCATGCCGCGTGTGTGAAGAAGG  
TCTTCGGATTGTAAAGCACTTTAAGTTGGGAGGAAGGGCTGCTGGTTAATACCCTGCAGT  
TTTGACGTTACCAACAGAATAAGCACCGGCTAACTTCGTG

>421 len=159 tot-seq=221

TGGGGAATTTTGGACAATGGGCGCAAGCCTGATCCAGCCATGCCGCGTGTCTGAAGAAGG

CCTTCGGGTTGTAAAGGACTTTTGTACAGGGAAGAAAAGGGGCATGTTAATACCGTGCTCT  
GATGACGGTACCTGAAGAATAAGCACCGGCTAACTACGT

>422 len=155 tot-seq=220

TGAGGAATATTGGTCAATGGGCGATAGCCTGAACCAGCCAAGTCGCGTGAAGGAAGACGG  
CCTTACAGGTTGTAACTTCTTTTATCGGAGAGTAAAGTGCACTACGTGTAGTGTATTGC  
AAGTATCCGAAGAAAAAGCATCGGCTAACTCCGTG

>423 len=161 tot-seq=220

TAGGGAATCTTCCGCAATGGACGAAAGTCTGACGGAGCAACGCCGCGTGAGTGATGAAGG  
CTTTCGGGTCGTAAACTCTGTTGTTAGGGAAGAACAAGTGCTAGTTGAATAAGCTGGCA  
CCTTGACGGTACCTAACCAGAAAGCCACGGCTAACTACGTG

>424 len=138 tot-seq=218

TGGGGAATATTGGGCAATGGAGGCAACTCTGACCCAGCAACGCCGCGTGAGTGATGAAGG  
TCTTCGGATTGTAAACTCTTTAAGTGGGGACGAAGAAAGTGACTGTACCCACAGAATAA  
GCCTCGGCTAACTACGTG

>425 len=137 tot-seq=218

TGGGGAATTTTCTGCAATGGAAGAAAACCTGACGGAGCAATGCCGCATGAAGGCAAAGG  
CCCACGGGTCATGAACTTCTTTTCTCAGAGAAGAAAAAATGACGGTATCTAAGGAATAAG  
CATCGGCTAACTCTGTG

>426 len=160 tot-seq=218

TGGGGAATATTGCACAATGGGGGAAACCCTGATGCAGCCATGCCGCGTGTGTGAAGAAGG  
CCTTCGGGTTGTAAAGCACTTTCAGCGAGGAGGAAAGGTCAGTAGCTAATATCTGCTGGC  
TGTGACGTTACTCGCAGAAGAAGCACCGGCTAACTCCGTG

>427 len=135 tot-seq=216

TGGGGAATATTGCACAATGGGGGAAACCCTGATGCAGCAACGCCGCGTGAGTGAAGAAGT  
ACCTCGGTATGTAAAGCTCTATCAGCAGGGAAGAAAATGACGGTACCTGACCAAGAAGCA  
CCGGCTAAATACGTG

>428 len=111 tot-seq=214

GCTCAGCATTATCCCTCCCTTGACAGCAGCAGCAGAACTGTGGTCCCCAGGAAAATCAC  
AAATGGAACCATTTGTTTGAATAATAACCCATTTGTCAGGGTTCATCTCC

>429 len=161 tot-seq=214

TAGGGAATCTTCGGCAATGGGGGCAACCCTGACCGAGCAACGCCGCGTGAGTGAAGAAGG  
TTTTCGGATCGTAAAGCTCTGTTGTAAGAGAAGAACGGGTGTGAGAGTGGAAAGTTCACA  
CTGTGACGGTATCTTACCAGAAAGGGACGGCTAACTACGTG

>430 len=203 tot-seq=212

TGGGGAATATTGCGCAATGGGGGGAACCCTGACGCAGCCATGCCGCGTGAATGAAGAAGG  
CCTTCGGGTTGTAAAGTTCCTTCGGTATTGAGGAAGGGATGTGTGCTAATAGTACATATC  
ATTGACGTTAAATACAGAAGAAGCACCGGCTAACTCCGTGGGGGGAGCCGGGTAATTGCC  
AGATCGGAAGAGCGTCGTGTTGG

>431 len=156 tot-seq=210

TGAGGAATCTTGGTCAATGGGCGCGAGCCTGAACCAGCCAAGTAGCGTGCAGGAAGACGG  
CCCTATGGGTTGTAAACTGCTTTTTATGGGAATAAAAGAGATCACGTGTTGATTTTTTG  
CAGGTACCATACGAATAAGGACCGGCTAATTCCGTG

>432 len=161 tot-seq=210

TAGGGAATCTTCGCAATGGACGAAAGTCTGACGGAGCAACGCCGCGTGAGCGATGAAGG  
CCTTCGGGTCGTAAAGCTCTGTTGTCAGGGAAGAACAAGTGCCGTTTGAACAGGGCGGCA  
CCTTGACGGTACCTGACCAGAAAGCCACGGCTAACTACGTG

>433 len=159 tot-seq=208

TGGGGAATTTTGGACAATGGGCGCAAGCCTGATCCAGCAATGCCGCGTGCAGGAAGAAGG  
CCTTCGGGTTGTAAACTGCTTTTGTACGGAACGAAAAGCTCTGGGTTAATACCCTGGGGT  
GATGACGGTACCGTAAGAATAAGCACCGGCTAACTACGT

>434 len=160 tot-seq=207

TGGGGAATTTTGGACAATGGGCGCAAGCCTGATCCAGCAATGCCGCGTGCAGGAAGAAGG  
CCTTCGGGTTGTAAACTGCTTTTGTACGGAAGAATAATCCTTTGGGTTAATACCTCGAAGG  
GATGACGGTACCTGAAGAATAAGCACCGGCTAACTACGTG

>435 len=156 tot-seq=205

TGAGGAATATTGGTCAATGGGCGAGAGCCTGAACCAGCCAAGTAGCGTGCAGGATGACGG  
CCCTATGGGTTGTAAACTGCTTTTATAGGGGAATAAAGTGAGCCACGTGTGGTTTTTTTGC  
ATGTACCCTATGAATAAGGACCGGCTAATTCCGTGG

>436 len=135 tot-seq=204

TCGGGAATATTGCGCAATGGAGGAACTCTGACGCAGTGACGCCGCGTGCAGGAAGAAGG  
TTTTCGGATTGTAACTGCTTTAGACAGGGAAAGAAAAAGACAGTACCTGTAGAATAAGC  
TCCGGCTAACTACGT

>437 len=160 tot-seq=203

TGGGGAATTTTGGACAATGGGGGCAACCCTGATCCAGCCATGCCGCGTGCGGGAAGAAGG  
CCTTCGGGTTGTAAACCGCTTTTGTGAGGGACGAAAAGCTCCGGAGTAATATGCCGGAGT  
GCTGACGGTACCTGAAGAATAAGCACCGGCTAACTACGTG

>438 len=138 tot-seq=203

TGGGGAATATTGGGCAATGGGCGCAAGCCTGACCCAGCAACGCCGCGTGAGGGAAGAAGG  
TTTTCGGATTGTAAACCTCTGTCCTAAGGGAAGAAGGAAGTGACGGTACCTTAGGAGGAA  
GCCCCGGCTAACTACGTG

>439 len=160 tot-seq=202

TAGGGAATCTCCACAATGGGCGCAAGCCTGATGGAGCAACACCGCGTGAGTGAAGAAGG  
GTTTCGGCTCGTAAACTCTGTTGTTGGAGAAGAACGTGCGTAAGAGTAACTGTTTACGC  
AGTGACGGTATCCAACCAGAAAGTCACGGCTAACTACGTG

>440 len=219 tot-seq=201

GCAGGTAAGGAAGAGAGAGAGAAAAGCACGAGAGGCAGGGGGGTGGAGTGAGAGGCAAAAT  
GGACTAGTCAAAACTGTCTGCAGATTCAATTATTCTACTAAACACGATGGGCAAATAGAA  
AACAGCTAAGACGACACACATGGGCAGGCAGCATTTCAGTGGGGAAAAGGGCCGTTCTCAT  
CTCAGCTCCCCTCCTTTCAGCCCTGCGTGCACTCGAGAA

>441 len=155 tot-seq=198

TGAGGAATATTGGTCAATGGGCGGAAGCCTGAACCAGCCAAGTAGCGTGCAGGATGACGG  
CCCTACGGGTTGTAACTGCTTTTATGCGGGGATAAAGGGCAATACGCGTATTGCTTTGC  
AGGTACCGCATGAATAAGGACCGGCTAATTCCGTG

>442 len=111 tot-seq=194

TCTGGGGCTTTGCTGGCCATTTGAAGGTGCAGAGACTAGTGTATATTAGGGCAGCCCTGG  
TGTTTGCTCAGTATCACAGTGGGCCTTTCTCTTTGCTACAGGAAAATCCCA

>443 len=140 tot-seq=194

TGGGGAATATTGCACAATGGGCGGAAGCCTGATGCAGCGACGCCGCGTGAGGGATGACGG  
CCTTCGGGTTGTAAACCTCTTTTCAGCTCTGACGAAGCTTTTGTGACGGTAGGAGCAGAAG  
AAGCACCGGCTAACTACGTG

>444 len=156 tot-seq=193

TGAGGAATATTGGTCAATGGGCGGAGCCTGAACCAGCCAAGTCGCGTGAGGGATGACGG  
CCCTACGGGTTGTAAACCTCTTTTGTGCGGGGAGCAAATCCGCCACGTGTGGCGGAGTCG  
AGAGTACCCGAAGAAAAGCATCGGCTAACTCCGTG

>445 len=160 tot-seq=192

TGGGGAATATTGCACAATGGGCGCAAGCCTGATGCAGCCATGCCGCGTGTATGAAGAAGG  
CCTTCGGGTTGTAAAGTACTTTTCAGCGGGGAGGAAGGCGTTGTGGTTAATAACCACAGCG  
ATTGACGTTACCCGCAGAAGAAGCACCGGCTAACTCCGTG

>446 len=154 tot-seq=191

TGAGGAATATTGGTCAATGGCCGGAAGGCTGAACCAGCCAAGTCGCGTGAGGGAAGACGG  
CCCTACGGGTTGTAAACCTCTTTTGTGCGGGGAGCAAAGGCGGTCATGCGTGACCGGATGA  
GAGTACCCGAAGAAAAGCATCGGCTAACTCCGT

>447 len=156 tot-seq=190

TGAGGAATATTGGTCAATGGGCGGAAGCCTGAACCAGCCAAGTCGCGTGAGGGAATAAGG  
CCCTACGGGTCGTAAACCTCTTTTGCCGGGGAGCAAGGGCGGGGACGTGTCCCGGCCCGG  
AGAGTACCCGGAGAAAAGCATCGGCTAACTCCGTG

>448 len=206 tot-seq=188

TGAGGAATATTGGTCAATGGGCGGAGAGCCTGAACCAGCCAAGTAGCGTGCAGGATGACGG  
CCCTATGGGTTGTAACTGCTTTTATATGGGGATAAAGTGGGGAACGTGTTCCCTTTTGC  
AGGTACCATATGAATAAGGACCGGCTAATTCCGTGGGGGGAGCCGCGTAATCAGTAGAT  
CGGAAGAGCGTCGTGTAGGGAACGAG

>449 len=133 tot-seq=188

TCGGGAATATTGCACAATGGAGGAACTCTGATGCAGTGACACCGCGTATAGGAAGAAGG  
CCTTAGGGTTGTAAGCTATTGTCGTGTGAGAAGAAAATGACTATCACAGGAGGAAGCCCT  
GGCTAAATATGTG

>450 len=135 tot-seq=187

TGGGGAATATTGCACAATGGGGGAAACCCTGATGCAGCAACGCCGCGTGAGTGAAGAAGT  
ATTCGGTATGTAAAGCTCTATCAGCAGGGAAGATAATGACGGTACCTGACTAAGAAGCT  
CCGGCTAAATACGTG

>451 len=142 tot-seq=186

TGGGGAATCTTGACAATGGGCGGAAGCCTGATGCAGCGACGCCGCGTGCGGGACGAAGG  
CCTTCGGGTCGTAAACCGCTTTCAGCAGGGACGAGGCCGCGAGGTGACGGTACCTGCAGA  
AGAAGCCCCGGCTAACTACGTG

>452 len=160 tot-seq=186

TAGGGAATCTCCACAATGGACGCAAGTCTGATGGAGCAACGCCGCGTGAGTGAAGAAGG  
CTTCGGGTCGTAAAACCTCTGTTGTTGGAGAAGAATGGTCGGCAGAGTAACTGTTGTCGG  
CGTGACGGTATCCAACCAGAAAGCCACGGCTAACTACGTG

>453 len=166 tot-seq=185

AGGGAGGAGAGGGTGGGAGAGGAAGAGCAGAGTGAGGGGATGGATTCTAGAGGAGGTGAC  
AGAGATGACTCAGACACCTTAGAGGAGGCCTGGACTCAGCTCAAACAGAAGTGCCTCTT  
CGGGCCCTTCTAAAATGCCTGGCAGCAACCAATGTCCCATGACTGT

>454 len=138 tot-seq=184

TGGGGAATATTGGACAATGGGGGCAACCCTGATCCAGCAATTCTGTGTGCACGATGAAGG  
TTTTCGGATTGTAAAGTGCTTTCAGCAGGGAAGAAAAAATGACGGTACCTGCAGAAGAA  
GCGACGGCTAAATACGTG

>455 len=160 tot-seq=184

TGGGGAATATTGCGCAATGGGGGAAACCCTGACGCAGCGACGCCGCGTGATGAAGAAGG  
CCTTCGGGTTGTAAAGTACTTTCAGCGGGGAGGAAGGGAGTAAAGTTAATACCTTTGCTC  
ATTGACGTTACCCGCAGAAGAAGCACCGGCTAACTCCGTG

>456 len=160 tot-seq=183

TGGGGAATATTGCACAATGGGGGAAACCCTGATGCAGCAACGCCGCGTGAGTGAAGAAGG  
TTTTCGGATCGTAAAGCTCTGTTGTTGGTGAAGAAGGATAGAGGTAGTAACTGGCCTTTA  
TTTGACGGTAATCAACCAGAAAGTCACGGCTAACTACGTG

>457 len=142 tot-seq=182

TAGGGAATCTCCACAATGGACGCAAGTCTGATGGAGCAACGCCGCGTGCGGGATGAAGG



CCTTCGGGTTGTAAACCGCTTTTGATTGGGAGCAAGCCTTCGGGTGAGTGTACCTTTCGA  
ATAAGCGCCGGCTAACTACGTG

>458 len=160 tot-seq=181

TGGGGAATATTGCGCAATGGGGGAAACCCTGACGCAGCGACGCCGCGTGAGTGAAGAAGG  
TTTTCGGATCGTAAAGCTCTGTTGTAAGAGAAGAACGAGTGTGAGAGTGGAAAGTTCACA  
CTGTGACGGTATCTTACCAGAAAGGGACGGCTAACTACGT

>459 len=156 tot-seq=180

TGAGGAATATTGGTCAATGGGCTTACGCCTGAACCAGCCAAGTCGCGTGAGGGAAGACTG  
CCCTATGGGTTGTAAACCTCTTTTGTGAGGGAGCAACGCCGGCTACGTGTAGCCGGACTG  
AGAGTACCTGAAGAAAAAGCATCGGCTAACTCCGTG

>460 len=160 tot-seq=180

TAGGGAATCTTCCGCAATGGGCGAAAGCCTGACGGAGCAATGCCGCGTGAGTGAAGAAGG  
CCTTCGGGTCGTAAACTCTGTTATAAGAGAAGAACAATTGTAGAGTAACTGCTACAGT  
CTTGACGGTATCTTATCAGAAAGCCACGGCTAACTACGTG

>461 len=138 tot-seq=179

TGGGGAATCTTGGACAATGGGTGAAAGCCTGATCCAGCAATATCGCGTGAGTGAAGAAGG  
GCAATGCCGCTTGTAAAGCTTTTCGTGAGTGAGCGCAAATGACAGGACTCGAGGAAGA  
AGCCCCGGTAACTCCAT

>462 len=171 tot-seq=177

TTCTGTCCAGGGAATTCCATCAGGGGAACGGGTGGGTCACAGTAGCCACGGGCTCATCCA  
CAGTGCCACAGTGACAGGGCACGTGGGCAAGGGCTGCAACTGCCAGCATCCTAGGCACA  
CCCCGAGTCTCCAGGCAGGGGTGTGTGCACAGCCCTTCACAGTGGCAGCTC

>463 len=136 tot-seq=176

TGGGGAATATTGCACAATGGGGGAAACCCTGATGCAGCGACGCCGCGTGGGCGAGGAAGT  
ACCTCGGTATGTAAAGCCCTATCAGCAGGGAAGAAACAGGACAGTACCTGACTAAGAAGC  
CCCGGCTAACTACGTG

>464 len=160 tot-seq=176

TAGGGAATATTGCACAATGGAGGAAACTCTGATGCAGCCATGCCGCGTGTGTGAAGAAGG  
CCTTCGGGTTGTAAAGTACTTTTCAGCGGGGAGGAAGGGAGTAAAGTTAATACCTTTGCTC

ATTGACGTTACCCGCAGAAGAAGCACCCGGCTAACTCCGTG

>465 len=160 tot-seq=174

TAGGGAATCTTCCACAATGGACGAAAGTCTGATGGAGCAACGCCGCGTGAGCGAAGAAGG

TTTTCGGATCGTAAAGCTCTGTTGCGAGGGAAGAACAAGTACGGGAGTAACTGCCCGTAC

CATGACGGTACCTCGTCAGAAAGCCACGGCTAACTACGTG

>466 len=141 tot-seq=174

GTACACGAGAGGGAAAATGCTGTGAGCAGTGAGACTTTGGCACAAAGATGAAAATAACCA

TGTTGGCAACAGATAATGGACAGCGAGGAGGGATGACTGTTCTCAGCTCTGCCCTTTG

CCTGTGCACGGAAACAGTGGT

>467 len=155 tot-seq=172

TAAGGAATATTGGACAATGGACGCAAGTCTGATCCAGCCATGCCGCGTGAAGGATGAATG

CCCTCTGGGTTGTAAACTTCTTTTACAGGGGAAGAAAGTTATCTTTTTTAGGATATTTGA

CGGTACCCTATGAATAAGCACCCGGCTAACTCCGTG

>468 len=160 tot-seq=172

TAGGGAATCTTCCACAATGGGCGAAAGCCTGATGGAGCAACGCCGCGTGTGTGATGAAGG

CTTTAGGGTTCGTAAAGCACTGTTGTATGGGAAGAAATGCTAGAATAGGGAATGATTCTAG

TTCGACGGTACCATAACCAGAAAGGGACGGCTAAATACGTG

>469 len=215 tot-seq=171

GCCAACAGGAGCCACAACAGATGTGGGCATCTGGCAGGAGACACACACCCACAGACAGTT

GCTTCCTTTCTCTGCTTTCCACTTGCTGTCAGAGACATTCCCCAGCATCAAGGTCAGAAA

GGAGGCTGGGTAGGGGAGTGTCTGGAGCTAGGACTGTTTCAGACAGGAGCTGGCAATGGCA

GAAGGGTCTGTGGGGTATCTAGATGTCATCCTTGT

>470 len=152 tot-seq=171

TGGGGGATATTGCACAATGGACGGAAGTCTGATGCAGCGACGTCGTGTGGGGGATGAAGG

CCTTCGGGTTGTAAACTCCTTCGCCCGCGAAAAGGCAGGGTTTTGGCCTTGTTGATGG

TAGTGGGTAAAGAAGCGCCGGCTAACTACGTG

>471 len=160 tot-seq=170

TGGGGAATTTTGGACAATGGGCGCAAGCCTGATCCAGCAATGCCGCGTGAGTGAAGAAGG

CCTTCGGGTTGTAAAGCTCTTTTGTGAGGGAAGAAACGGCTGCGGCTAATATCTGCGGCT

AATGACGGTACCTGAAGAATAAGCACCCGGCTAACTACGTG

>472 len=137 tot-seq=170

TGGGGGATATTGCACAATGGGGGAAACCCTGATGCAGCGATGCCGCGTGAGGAAGAAGG

TTTTCGGATTGTAACTCCTGTCGTAAGGGACGAAGAAGTGACGGTACCTTACAAGAAAG

CTCCGGCTAACTACGTG

>473 len=161 tot-seq=169

TAGGGAATCTTCGGCAATGGACGAAAGTCTGACCGAGCAACGCCGCGTGAGTGATGAAGG

TTTTCGGATCGTAAACTCTGTTGTTAGAGAAGAACAAGTACCGTTTGAATAAGGCGGTA

CCTTGACGGTACCTAACGAGAAAGCCCCGGCTAACTACGTG

>474 len=137 tot-seq=169

TGGGGAATATTGGACAATGGAGGAGACTCTGATCCAGCAATTCTGTGTGCACGAAGACGG

TTTTCGGATTGTAAAGTGCTTTCAGCAGGGAAGAAGAAAGTGACGGTACCTGCAGAAGAA

GCGACGGCTAAATACGT

>475 len=203 tot-seq=167

TAGGGAATCTTCGGCAATGGGGGCAACCCTGACCGAGCAACGCCGCGTGAGTGAAGAAGG

GTTTCGGCTCGTAAAGCTCTGTTGGTAGTAAGAAAGATAGAGGTAGTAACTGGCCTTTA

TTTGACGGTAATTACTTAGAAAGTCACGGCTAACTACGTGGGGGGAGCCGCGGTATCACA

AGATCGGAAGAGCGTCGTGTAGG

>476 len=161 tot-seq=166

TGGGGAATATTGCGCAATGGGCGAAAGCCTGACGCAGCGACGCCGCGTGAGGGATGAAGG

TTCTCGGATCGTAAACCTCTGTCAGGGGGGAAGAAACCCCTCGTGTGAATAATGCGAGG

GCTTGACGGTACCCCAAAGGAAGCACCGGCTAACTCCGTG

>477 len=135 tot-seq=166

TGGGGGATATTGCACAATGGGGGGAACCCTGATGCAGCGACGCCGCGTGGGTGAAGGAGT

GCTTCGGCATGTAAAGCCCTATCGGCAGGGAAGAAGCAAGACGGTACCTGACTAAGAAGC

CCCGGCTAACTACGT

>478 len=135 tot-seq=165

TGGGGAATATTGCACAATGGGGGAAACCCTGATGCAGCAACGCCGCGTGAGTGAAGAAGG

CTTTCGGGTCGTAAACTCTGTCGCATAGGAAGAAAAGGACAGTACTATGCAAGGAAGTC

CCGGCTAACTACGTG

>479 len=156 tot-seq=163

TGAGGAATATTGGTCAATGGCCGGAAGGCTGAACCAGCCAAGTCGCGTGAGGGAATAAGG  
CCCTATGGGTCGTAAACCTCTTTTGTGAGGGAGCAAAGGCGTCCACGTGTGGACGAGAGG  
AGAGTACCTGAAGAAAAAGCATCGGCTAACTCCGTG

>480 len=203 tot-seq=163

TCAGCAGAGACTGTGGCAAAGAAGTGAAGTCTCTGGCGGACATCTGGACCTGCAAGCCAT  
CCAGAGCATTGTCTTGGCAGTGGCGAGATGGTCAGGTCAGCACCTGGGTCCTTCCCAGC  
TTAGGCACACTTTTTGCCAGGATAGGAGCTTCTCAGGCCAGGGCCTCTCTTGCCAGTGCA  
GGCAGTCATGCCTGGCATCAAGT

>481 len=154 tot-seq=163

TGAGGAATATTGGTCAATGGGCGAGAGCCTGAACCAGCCAAGTCGCGTGAGGGAAGACGG  
TCCTACGGATTGTAAACCTCTTTTGTGAGGGAGCAAGGAGCGCCACGAGTGGTGCGGCGA  
GAGTACCTGAAGAAAAAGCATCGGCTAACTCCGT

>482 len=172 tot-seq=163

TGGGGAATATTGCGCAATGGGGGAAACCCTGACGCAGCGACGCCGCGTGAGTGAAGAAGG  
GTTTCGGCTCGTAAAGCTCTGTTGTTGGTGAAGAAGGACAGGGGTAGTAACTGACCTTTG  
TTTGACGGTAATCAATTAGAAAGTCACGGCTAACTACGTGGGGGGAGCGCGG

>483 len=154 tot-seq=162

TGAGGAATATTGGTCAATGGACGAGAGTCTGAACCAGCCAAGTAGCGTGCAGGATGACGG  
CCCTATGGGTTGTAACTGCTTTTATAGGGGGATAAAGTGTGTACGTGTGGCATATTGC  
AGGTACCCTATGAATAAGGACCGGCTAATTCCGT

>484 len=135 tot-seq=161

TGGGGAATATTGCACAATGGGGGAAACCCTGATGCAGCGACGTCGCGTGAGCGAAGAAGG  
CCTTCGGGTCGTAAAGCTCTGTCTATGGGAAGAAAAGGACGGTACCATAGAAGGAAGCC  
CCGGCTAACTACGTG

>485 len=140 tot-seq=161

TGGGGAATATTGCACAATGGGCGCAAGCCTGATGCAGCGACGCCGCGTGGGGGATGACGG  
CCTTCGGGTTGTAACTCCTTCGCTAGGGACGAAGCGCAAGTACGGTACCTAGAGAAG

AAGCACCGGCTAACTACGTG

>486 len=159 tot-seq=160

TAGGGAATCTTCCACAATGGACGCAAGTCTGACGGAGCAACGCCGCGTGAGTGATGACGG  
CCTTCGGGTTGTAAAGCTCTGTTAATCGGGACGAATGGTCCTTGTGTGAATAATGCAAGG  
ATTTGACGGTACCGGAATAGAAAGCCACGGCTAACTACG

>487 len=141 tot-seq=160

TGGGGAATCTTCCGCAATGGACGAAAGTCTGACGGAGCGACGCCGCGTGCGGGATGAAGG  
CCTTCGGGTTGTAAACCGCTTTTGATTGGGAGCAAGCTTTCGGGTGAGTGTACCTTTCGA  
ATAAGCGCCGGCTAACTACGT

>488 len=152 tot-seq=159

TAAGGAATATTGGACAATGGGCGAAAGCCTGATCCAGCCATGCCGCGTGAAGGATTAAGG  
TCCTCTGGATTGTAACTTCTTTATTTGGGACGAAAAAGGGAATTCTTCCCACTTGA  
CGGTACCAAGTGAATAAGCACCGGCTAACTCC

>489 len=155 tot-seq=158

TGAGGAATATTGGTCAATGGGCGGGAGCCTGAACCAGCCAAGTCGCGTGAGGGATGACGG  
CCCTATGGGTTGTAAACCTCTTTTGCCGGGGAGCAAAGTGCCGCACGTGTGCGGTTTGGGA  
GAGTACCCGGAGAAAAAGCATCGGCTAACTCCGTG

>490 len=160 tot-seq=157

TGGGGAATTTTGGACAATGGGCGCAAGCCTGATCCAGCCATGCCGCGTGTCTGAAGAAGG  
CCTTCGGGTTGTAAAGGACTTTTGTGAGGGAGGAAATCCCTAGCGCTAATATCGCTGGGG  
GATGACAGTACCTGAAGAATAAGCACCGGCTAACTACGTG

>491 len=160 tot-seq=156

TGGGGAATTTTGGACAATGGGCGAAAGCCTGATCCAGCAATGCCGCGTGTGTGATGAAGG  
CCTTCGGGTTGTAAAGCACTTTTGGCGGGAACGAAAAGGACTGTGCCAATACCACGGTTC  
GATGACGGTACCCGCAGAATAAGCACCGGCTAACTACGTG

>492 len=160 tot-seq=156

TAGGGAATTTTCGGCAATGGGGGGAACCTGACCGAGCAACGCCGCGTGAAGGAAGAAGG  
AATTCGTTCTGTAACTTCTGTTATAAAGGAAGAAAGACGGATGGAGGAAATGACATCCG  
AGTGACGGTACTTTATGAGAAAGCCACGGCTAACTACGTG

>493 len=217 tot-seq=155

ACAGTGGCCCCACTGTAGCTATCAATGCAATCCAGGCTCAACTGAGGTCCTCTGTCAC  
TTGAGATTGAAATAAAATTGGCTTAACCCCCTATCTTAAATCCATTGGGAAGACCAAGA  
TTGTAGCACATTCCCAGGAACTGAAATTCTCAAGGCACTGCTGACTCCACAGTTTCAGGC  
TGTCCCTCTCAATCCCTCACTCAGCTCTTCTGCTTCC

>494 len=136 tot-seq=153

TGGGGAATATTGGGCAATGGGCGAAAGCCTGACCCAGCAACGCCGCGTGAGGGAAGAAGG  
GTTTCGGCTCGTAAACCTCTGCTCTATGGGACGAAAGAGATGACGGTACCATAGGAGGAA  
GCCCCGGCTAACTACG

>495 len=161 tot-seq=152

TAGGGAATCTTCCACAATGGGCGAAAGCCTGATGGAGCAACGCCGCGTGGGTGAAGAAGG  
TCTTCGGATCGTAAACCTGTTGTTAGAGAAGAACGTTGGTAGGAGTGAAAAATCTACC  
AAGTGACGGTAACTAACCAGAAAGGGACGGCTAACTACGTG

>496 len=161 tot-seq=150

TGGGGAATCTTCCGCAATGGGCGAAAGCCTGACGGAGCAACGCCGCGTGAGTGATGACGG  
CCTTCGGGTTGTAAAGCTCTGTGATCGGGGACGAACGGTCAGCAGACGAATACTCTGCTG  
AAGTGACGGTACCCGAATAGCAAGCCACGGCTAACTACGTG

>497 len=214 tot-seq=150

TGAGGAATATTGGTCAATGGGCGGGAGCCTGAACCAGCCAAGTCGCGTGAGGGACGACGG  
TCCTATGGATTGTAAACCTCTTTTGTCTGGGGAACAAAGGCGTCCACGAGTGGGCGGATGA  
GTGTACCCGAAGAAAAAGCATCGGCTAACTCCGTGCCAGCGCCGCGGAATTAAGAGATCG  
GAAGAGCGTCGTGTAGGGAAAAGAGGAATATTGG

>498 len=213 tot-seq=150

TAGGGAATCTTCCACAATGGACGCAAGTCTGATGGAGCAACGCCGCGTGAGTGAAGAAGG  
TTTTCGGATCGTAAAGCTCTGTTGTTAAGGAAGAACGAGTGTGAGAATGGAAAGTTCATG  
CTGTGACGGTACTTAACCAGAAAGGGACGGCTAACTACGTGGGGGGAGCCCGCGGTAATA  
GCTAGATCGGAAGAGCGTCGTGTAGGGATAGGG

>499 len=155 tot-seq=149

TGAGGAATATTGGTCAATGGACGCAAGTCTGAACCAGCCAAGTAGCGTGCAGGATGACGG

CCCTATGGGTTGTAACTGCTTTTATGCGGGGATAAAGTGCGCGACGTGTCGTGCATTGC  
AGGTACCGCATGAATAAGGACCGGCTAATTCCGTG

>500 len=141 tot-seq=149

TGGGGAATCTTGCACAATGGGGGAAACCCTGACGCAGCGACGCCGCGTGCGGGATGAAGG  
CCTTCGGGTTGTAAACCGCTTTCAGCAGGGACGAGGCCTTATGGTGACGGTACCTGCAGA  
AGAAGCTCCGGCTAAATACGT

>501 len=141 tot-seq=146

TGGGGAATATTGCACAATGGGCGCAAGCCTGATGCAGCGACGCCGCGTGGGGGATGAAGG  
CCTTCGGGTTGTAACTCCTTCGCTAGGGACGAAGCTTTTTGTGACGGTACCTGGAGAA  
GAAGCACCGGCTAACTACGTG

>502 len=143 tot-seq=146

TAGGGAATCTTCCACAATGGGGGAAACCCTGACGCAGCGACGCCGCGTGCGGGATGAAGG  
CCTTCGGGTTGTAAACCGCTTTTGATTGGGAGCAAGCCTTTTGGGTGAGTGTACCTTTCG  
AATAAGCGCCGGCTAACTACGTG

>503 len=215 tot-seq=145

TGAGGAATATTGGACAATGGGCGGAAGCCTGATCCAGCCATGCCGCGTGAAGGACTAAGG  
CCCTATGGGTCGTAAACTTCTTTTGACGCAGAGCAATAAGGACCACGCGTGGACCGATGA  
GAGTATGCGTCGAATAAGCATCGGCTAACTCCGTGGGGGGAGCCGGTAATACAAAGATC  
GGAAGAGCGTCGTGTAGGGGGGGAGTGTGCCAATG

>504 len=135 tot-seq=145

TAGGGAATATTGCTCAATGGGGGAAACCCTGAAGCAGCAACGCCGCGTGGAGGATGAAGG  
TTTTAGGATTGTAACTCCTTTTGTGAGAGAAGATTATGACGGTATCTCACGAATAAGCA  
CCGGCTAACTCCGTG

>505 len=135 tot-seq=145

TGGGGAATATTGCGCAATGGGGGAAACCCTGACGCAGCGACGCCGCGTGAGCGAAGAAGT  
ATTCGGTATGTAAAGCTCTATCAGAAGGGAAGAAAATGACGGTACCTTACTAAGAAGCT  
CCGGCTAAATACGTG

>506 len=182 tot-seq=144

TGAGGAATATTGGTCAATGGGCGAGAGCCTGAACCAGCCAAGTAGCGTGCAGGAAGACGG

CCCTATGGGTTGTAACTGCTTTTATGTGGGGATAAAGTGCGCGACGTGTCGTGCATTGC  
AGGTACCACATGAATAAGGACCGGCTAATTCGTGGGGGGAGCCGCGTAATACCAAGATC  
GG

>507 len=161 tot-seq=144

TGGGGAATATTGCACAATGGGGGAAACCCTGATGCAGCAACGCCGCGTGAGTGAAGAAGG  
TTTTCGGATCGTAAAGCTCTGTTGTTAGAGAAGAACGTTGGTAGGAGTGAAAAATCTACC  
AAGTGACGGTAACTAACCAGAAAGGGACGGCTAACTACGTG

>508 len=135 tot-seq=142

TGGGGAATATTGCGCAATGGAGGAAACTCTGACGCAGCAACGCCGCGTGAATGATGAAGG  
CCTTAGGGTTGTAAAGTTCTGTCTTCTGGGACGATAATGACGGTACCAGAGGAGGAAGCC  
ACGGCTAACTACGTG

>509 len=135 tot-seq=142

TGGGGAATATTGCACAATGGGGGAAACCCTGATGCAGCGACGCCGCGTGAACGAAGAAGT  
ACCTCGGTATGTAAAGTTCTATCAGCAGGGAAGAAAATGACGGTACCTGACTAAGAAGCC  
CCGGCTAACTACGTG

>510 len=160 tot-seq=142

TAGGGAATATTGCACAATGGGGGAAACCCTGATGCAGCCATGCCGCGTGTGTGAAGAAGG  
CCTTCGGGTTGTAAAGCACTTTCAGATGGGAAAAAAGTAGTAATTCGAATAGGGTTGCTA  
TGTGATATTACTATCAGAAGAAGCACCGGCTAACTCCGTG

>511 len=161 tot-seq=142

TGGGGAATCTTCGCAATGGACGAAAGTCTGACGGAGCAACGCCGCGTGAGTGAAGAAGG  
CCTTCGGGTTGTAAAGCTCTGTTATTCGGGAAGAAAGATTGTTTTGTGAACAATGAACGG  
AAGTGACGGTACCGAAAGAGAAAGCCACGGCTAACTACGTG

>512 len=135 tot-seq=140

TGGGGAATCTTCGCAATGGACGAAAGTCTGACGGAGCAACGCCGCGTGAACGATGAAGG  
TCTTCGGATCGTAAAGTTCTGTTGCAGGGGAAGATAATGACGGTACCCTGTGAGGAAGCC  
CCGGCTAACTACGTG

>513 len=160 tot-seq=140

TAGGGAATCTTCGCAATGGACGGAAGTCTGACCGAGCAACGCCGCGTGAGTGAAGAAGG



TTTTCGGATCGTAAAGCTCTGTTGTTGGAGAAGAACGTGCGTAAGAGTAACTGTTTACGC  
AGTGACGGTATCCAACCAGAAAGTCACGGCTAACTACGTG

>514 len=160 tot-seq=138

TGGGGAATTTTGGACAATGGGCGCAAGCCTGATCCAGCTATTCCGCGTGTGGGATGAAGG  
CCCTCGGGTTGTAAACCACTTTTGTAGAGAACGAAAAGACACCTTCAATAAAGGGTGT  
GCTGACGGTACTCTAAGAATAAGCACCGGCTAACTACGTG

>515 len=212 tot-seq=137

GATCACGTGAGGCCAGGAGTTCAAGGACAGCCTGAGCAATATTGCAAGATCTTTCCTCTA  
AAAAATTAATAAACTTAAAAAAAAAAGAAATGGAACAGTCAACCCAACCTCCTTCTCC  
TATATTTACAGAGAGACCACATACTTAAACAAATATAAGCATGCTTAACAATGCAATGAG  
ACAAGTAACCAGAGGGAAGGGTCTGTGGAAGT

>516 len=145 tot-seq=135

GAAAAAGATCATGCCAGTAAGCTGCTTGAAGAAATGGGTAATGCTCCTATGCTAATTT  
ATGTTTCAATCCTTTATTGTATTTTCTTAAACAATCGAATTTGCTTTCAAATTAATGC  
ATTAATTAACACTATATCCTGTTC

>517 len=154 tot-seq=135

TGAGGAATATTGGTCAATGGGCGAGAGCCTGAACCAGCCAAGTCGCGTGAAGGATGACTG  
TCTTATGGATTGTAACTTCTTTTATACGGGAATAACAAGAGTCACGTGTGACTCCCTGC  
ATGTACCGTATGAATAAGCATCGGCTAACTCCGT

>518 len=135 tot-seq=135

GCGCGCAAATTACCAATCCTGACACGGGGAGGTAGTGACAATAAATAACAATACCGGGC  
GCATTAGTGTCTGGTAATTGGAATGAGTACAATCTAAATCCCTAACGAGGATCCATTGG  
AGGGCAAGTCTGGTG

>519 len=160 tot-seq=134

TGGGGAATCTCCGCAATGGGCGCAAGCCTGACGGAGCAACGCCGCGTGAGTGAAGAAGG  
TTTTCGGATCGTAAAGCTCTGTTGAGAGGGACGAGAGGCAAGGCTAGGAAATGAGCTTTG  
TAGGACGGTACCTTTCGAGGAAGCCACGGCTAACTACGTG

>520 len=138 tot-seq=133

GGGGGAATATTGGGCAATGGGGGGAACCCTGACCCAGCAATGCCGCGTGAAGGAAGAAGG

CCTTCGGGTTGTAACTTCTGTGACGAGGGACGAAGGAAGTGACGGTACCTCGAGAGGAA  
GCTCCGGCAAACACTACGTG

>521 len=161 tot-seq=130

TAGGGAATCTTCGGCAATGGGGGGAACCCTGACCGAGCAACGCCGCGTGAGTGAAGAAGG  
TTTTCGGATCGTAAAGCTCTGTTGTTAAGGAAGAACGTGTGTGAGAGTGGAAGTTCACA  
CAGTGACGGTACTTAACCAGAAAGGGACGGCTAACTACGTG

>522 len=135 tot-seq=129

TGGGGGATATTGCACAATGGGGGGAACCCTGATGCAGCGACGCCGCGTGGGTGAAGAAGC  
GCCTCGGCGCGTAAAGCCCTGTCAGCAGGGGAAGAAAATGACGGTACCTGAAGAAGAAGCC  
CCGGCTAACTACGTG

>523 len=142 tot-seq=129

TGGGGAATCTTGCGCAATGGGCGAAAGCCTGACGCAGCGATGCCGCGTGCGGGATGAAGG  
CCTTCGGGTCGTAAACCGCTTTCAGCAGGGACGAGGCCGCAAGGTGACGGTACCTGCAGA  
AGAAGCCCCGGCTAACTACGTG

>524 len=138 tot-seq=128

TGGGGAATATTGCACAATGGGGGGAACCCTGATGCAGCAACGCCGCGTGAAGGAAGAAGG  
TTTTCGGATCGTAACTTCTATCAACAGGGACGAAGAAAGTGACGGTACCTGAATAAGAA  
GCCCCGGCTAACTACGTG

>525 len=161 tot-seq=128

TGGGGAATATTGCACAATGGGGGGAACCCTGACCGAGCAACGCCGCGTGAGTGAAGAAGG  
TTTTCGGATCGTAAAGCTCTGTTGTTAAGGAAGAACGAGTGTGAGAATGGAAGTTCATG  
CTGTGACGGTACTTAACCAGAAAGGGACGGCTAACTACGTG

>526 len=230 tot-seq=127

GGCGACATGCTCAGGACTTGATCAGGGCAGATGCCCTTCCTGGCGTGGCCACCATGGGAC  
AATGCATGCACAGCTTTCATAGACCATCTCCTCAACACCACCACCCGCCCTCCCCAAC  
ACACACTCACATGCTTGCACACACACACGCACATAGGCACACACACCGAGAAAAGACAGC  
AGGTCCAAGATGAATTATCTGAATCCAGCCCCAGCTCCCAAAGCATGGCC

>527 len=138 tot-seq=126

TGGGGAATTTCCGCAATGGGCGAAAGCCTGACGGAGCAATACCGCGTGAGGGAGGAAGG

CTCTTGGGTTGTAAACCTCTTTTCTCAGGGAAGAATACAATGACGGTACCTGAGGAATAA  
GCATCGGCTAACTCCGTG

>528 len=155 tot-seq=125

TGAGGAATATTGGTCAATGGGCGGGAGCCTGAACCAGCCAAGCCGCGTGAAGGAAGAAGG  
CGCCAGGCGTCGTAAACTCTTTTGTCTGGGGAACAAAGGGCGCCACGTGTGGCGTTGTGA  
GTGTACCCGAAGAAAAAGCATCGGCTAACTCCGTG

>529 len=122 tot-seq=125

TGGTTGGGGGAGTGGGGACCCTAGGGCAGGGTGCAGGCCTCCTGAGGCCTGGAGCTGCAG  
GCCCTCCAGGCACTGGACACTTAGGACTGTGGGAGCAGGCAGCAGATCAGCTTGTGTTCC  
AG

>530 len=135 tot-seq=124

TGGGGAATATTGCACAATGGAGGAAACTCTGATGCAGCGACGCCGCGTGAGTGAAGAAGT  
ATTTCCGGTATGTAAAGCTCTATCAGCAGGGAAGAAAATGACGGTACCTGACTAAGAAGCA  
CCGGCTAAATACGTG

>531 len=142 tot-seq=124

TGGGGAATATTGCGCAATGGGGGAAACCCTGACGCAGCGACGCCGCGTGCGGGATGAAGG  
CCTTCGGGTTGTAAACCGCTTTTGATTGGGAGCAAGCCTTTTGGGTGAGTGTACCTTTCCG  
AATAAGCGCCGGCTAACTACGT

>532 len=160 tot-seq=123

TGGGGAATTTTGGACAATGGGCGCAAGCCTGATCCAGCTATTCCGCGTGTGGGAAGACGG  
CCTTCGGGTTGTAAACCACTTTTGTAGAGAACGAAAAGTCTATTGATAATACCGATAGAC  
GATGACGGTACTCTAAGAATAAGCACCGGCTAACTACGTG

>533 len=160 tot-seq=122

TGGGGAATTTTGGACAATGGGCGCAAGCCTGATCCAGCAATGCCGCGTGCAGGAAGAAGG  
CCTTCGGGTTGTAAACTGCTTTTGTCTAGGGAAGAAATCTTCTGGGCTAATACCCCGGGAG  
GATGACGGTACTGAAGAATAAGCACCGGCTAACTACGTG

>534 len=154 tot-seq=122

TAAGGAATATTGGACAATGGGCGCAAGCCTGATCCAGCCATGCCGCGTGAAGGATTAAGG  
TCCTCTGGATTGTAAACTCTTTTATAAGGGACGAAAAAAGGGAATTCTTTCTCACTTGA

CGGTACCTTATGAATAAGCACCGGCTAACTCCGT

>535 len=136 tot-seq=122

TGGGGAATATTGCGCAATGGGGGAAACCCTGACGCAGCGACGCCGCGTGCGGGAAGGAGG  
CCTTCGGGTCGTAAACCGCTTTCAGCAGGGAAGAAGCCTGACGGTACCTGCAGAAGAAGC  
CCCGGCTAACTACGTG

>536 len=160 tot-seq=122

TAGGGAATCTTCCACAATGGACGCAAGTCTGATGGAGCAACGCCGCGTGAGTGATGAAGG  
TCTTCGGATCGTAAACTCTGTTATTAGGGAAGAACATATGTGTAAGTAACTGTGCACAT  
CTTGACGGTACCTAATCAGAAAGCCACGGCTAACTACGTG

>537 len=142 tot-seq=121

TGAGGAATATTGGTCAATGGGCGAAAGCCTGATGCAGCGACGCCGCGTGCGGGATGAAGG  
CCTTCGGGTTGTAAACCGCTTTCAGCAGGGACGAGGCCGCAAGGTGACGGTACCTGCAGA  
AGAAGCCCCGGCTAACTACGTG

>538 len=135 tot-seq=120

AGGAAAGGATGATGTTCTTAGGCTTGGGTTTACCCCATGGGGGTGGAGAAGCAAGAGGAA  
GTCAGAAATTTATTATGTGGGTGGGGAATCACTGTGTACATGGAGAGAAGACAACCTGCA  
GGAATTGTTGGAATA

>539 len=159 tot-seq=120

TAGGGAATCTTCCACAATGGGTGAAAACCTGATGGAGCAATGCCGCGTGAATGAAGAAGG  
TCTTCGGATCGTAAAGTTCTGTTATTAGAGAAGAACAAGTCAAGGAGTAACTGTCTTGAC  
TTTGACGGTACCTAACCAGAAAGTCACGGCTAACTACGT

>540 len=154 tot-seq=120

TGAGGAATATTGGTCAATGGACGAAAGTCTGAACCAGCCAAGTAGCGTGACAGGATGACGG  
CCCTCTGGGTTGTAAACTGCTTTTAGTTGGGAATAAAAAAGAGGACGTGTCCTCTATTGT  
ATGTACCTCAGAAAAAGGACCGGCTAATTCCGT

>541 len=135 tot-seq=120

TAGGGAATCTTCCACAATGGACGCAAGTCTGATGGAGCAACGCCGCGTGAGTGAAGAAGG  
TTTTCGGATCGTAAAGCTCTGTCTTTGGGGAAGATAATGACGGTACCCAAGGAGGAAGCC  
ACGGCTAACTACGTG

>542 len=154 tot-seq=119

TGAGGAATATTGGTCAATGGGCGAGAGCCTGAACCAGCCAAGTCGCGTGAGGGAAGAATG  
GTCTATGGCCTGTAAACCTCTTTTGTCAAGGAAGAATAAAAGGTACGTGTACCTTCTTGC  
CAGTACTTGACGAATAAGCATCGGCTAACTCCGT

>543 len=204 tot-seq=119

TTGCAGTAAATGAGACAGAATGTAGCTCAGGCAGCAGAATGACAGTCTAGGCTCCTGAGA  
GCCAGACCCTGGCTCTTTGTAACCATGGTACGGAGTGGAGAGCACGTTCTGGTAACCTTG  
GGCATGAGGTGGGGCCTGGGCAGTCAGGGCACCGTCCCTGAGAGGGTGAGAGCAAAGCC  
AGCCTCTGCCCTATGTGATGAAAC

>544 len=134 tot-seq=118

ACATGCACGGCACCCTCACACATGCACACACAAGGAAGCAGCAGACACGCACTGCCCTC  
CTGCACACACACACTCACACACCCTCACATACACTCACTGATGCATACAGCCCACGTC  
AGAGTCCACTGGGC

>545 len=138 tot-seq=118

TGGGGAATATTGGGCAATGGGCGCAAGCCTGACCCAGCAACGCCGCGTGAAGGAAGAAGG  
CTTTCGGGTTGTAAACTTCTTTTGTCTGGGGACGAAACAAATGACGGTACCCGACGAATAA  
GCCACGGCTAACTACGTG

>546 len=159 tot-seq=118

TAGGGAATTTTCGTCAATGGGGGGAACCCTGAACGAGCAATGCCGCGTGAGTGAAGAAGG  
TCTTCGGATCGTAAAGCTCTGTTGTAAGAGAAAAAGGGCGCATATAGGAAATGATATGCG  
ATTGATGGTATCTTACCAGAAAGCCACGGCTAACTACGT

>547 len=155 tot-seq=117

TGAGGAATATTGGTCAATGGGTGCAAGCCTGAACCAGCCATCCCGCGTGAAGGACGACTG  
CCCTATGGGTTGTAAACTTCTTTTGTATAGGGATAAACCTACCCTCGTGAGGGTAGCTGA  
AGGTAATAACGAATAAGCACCGGCTAACTCCGTG

>548 len=155 tot-seq=117

TGAGGGATATTGGTCAATGGGCGGAAGCCTGAACCAGCCATGCCGCGTGCCGGAAGACGG  
CCCTACGGGCTGTAAACGGCTTTTCGCTCCGAGGAATAAGGGGGCCTCGGCCCCCGATGC  
CAGTAGGGGCGGAATAAGGATCGGCTAACTCCGTG

>549 len=194 tot-seq=117

AAATCTTATAACAGATTACTACTTTGATCAGCATCAGAGGAAAAAAAAAAGAGCCATAT  
ATTTTGTCTGCATGGGAATGATGCATTACCTGCCCCGACCTTTGGTTTTGCTCTACTGA  
TAGAACGCAGGAGACACCCAAGGGTCACAGAGACACCCACAGTTCTGTGTTTTTCCACTC  
CGAGCTTCCCTGTG

>550 len=154 tot-seq=115

TGAGGAATATTGGTCAATGGAGGAACTCTGAACCAGCCAAGTCGCGTGAAGGATGACGG  
TCCTATGGATTGTAACTTCTTTAGTAGGTGAGTAAGGATAGGTACGTGTACCTATTAGA  
AAGTAGCCTAAGAATAAGTATCGGCTAACTCCGT

>551 len=134 tot-seq=115

TGGGGAATATTGCACAATGGGCGAAAGCCTGATGCAGCAACGCCGCGTGCGGGATGACGG  
CCTTCGGGTTGTAAACCGCTTTCACCAGGGGCGAATTTGACGGTACCTGGAGAAGAAGCA  
CCGGCTAACTACGT

>552 len=154 tot-seq=115

TGAGGAATATTGGTCAATGGGCGAGAGCCTGAACCAGCCAAGTCGCGTGAGGGAAGACGG  
TCCTATGGATTGTAAACCTCTTTTGCCGGGGAGCAAAAAGCGGTACGTGTACCGCATCGA  
GAGTACCCGGAGAAAAGCATCGGCTAACTCCGT

>553 len=156 tot-seq=112

TGAGGAATATTGGTCAATGGGCGAGAGCCTGAACCAGCCAAGTCGCGTGAGGGAAGACGG  
CCCTACGGGTTGTAAACCTCTTTTGCCGGGGAGCAATGGCCGACACGCGTGTCCGGCAGGG  
AGAGTACCCGGAGAAAAGCATCGGCTAACTCCGTG

>554 len=156 tot-seq=111

TGAGGAATATTGGTCAATGGGCGGGAGCCTGAACCAGCCAAGTCGCGTGAGGGAAGACGG  
TCCTATGGATTGTAAACCTCTTTAGGCGGGGAGCAATGCCGGGCACGCGTGCCCGGAGGG  
AGAGTACCCGCAGAATAAGCATCGGCTAACTCCGTG

>555 len=153 tot-seq=110

TGAGGAATATTGGTCAATGGACGCAAGTCTGAACCAGCCATGCCGCGTGCAGGATGACGG  
CTCTATGAGTTGTAACTGCTTTTGTACGAGGGTAAATCCCGATACGTGTATCGGGTTGA  
AAGTATCGTACGAATAAGGATCGGCTAACTCCG

>556 len=155 tot-seq=110

TGAGGAATATTGGTCAATGGGCGCAAGCCTGAACCAGCCATGCCGCGTGCAGGATGAAGC  
ATCTATGGTGTGTAAACTGCTTTTATACGAGAAGAAACAACGCTACGTGTAGCGTCTTGA  
CGGTATCGTAAGAATAAGGACCGGCTAACTCCGTG

>557 len=140 tot-seq=110

TGGGGAATATTGCGCAATGGGGGAAACCCTGACGCAGCGACGCCGCGTGCGGGATGAAGG  
CCTTCGGGTTGTAAACCTCTTTTATCGGGGAGCAAGCGAGAGTGAGTTTACCCGTTGAAT  
AAGCACCGGCTAACTACGTG

>558 len=137 tot-seq=109

TGGGGAATATTGGGCAATGGGCGCAAGCCTGACCCAGCAACGCCGCGTGAAGGAAGAAGG  
CCCTCGGGTTGTAAACTTCTTTTCTATAGGACGAAGAAGTGACGGTACTATAGGAATAAG  
CCACGGCTAACTACGTG

>559 len=138 tot-seq=109

TGGGGAATATTGCGCAATGGGGGAAACTCTGATCCAGCAATTCTGTGTGTGTGAAGAAGG  
TTTTAGGACTGTAAACACTTTTAGTAGGGAAGAAAAAATGACGGTACCTACAGAAGAA  
GCAACGGCTAAATACGTG

>560 len=160 tot-seq=108

TGGGGAATATTGCACAATGGGGGAAACCCTGATGCAGCAACGCCGCGTGAGTGAAGAAGG  
TCTTCGGATCGTAAACTCTGTTGTTAGAGAAGAACACGAGTGAGAGTAACTGTTCAATC  
GATGACGGTATCTAACCAGCAAGTCACGGCTAACTACGTG

>561 len=160 tot-seq=108

TAGGGAATTTTCGTCAATGGGGGCAACCCTGAACGAGCAATGCCGCGTGAGCGAAGAAGG  
TCTTCGGATTGTAAAGCTCTGTTGCCGGGAAAAAGGAAGGAAAGAGGAAATGCTTTTCT  
TTGGATGGTACCCGGCCAGAAAGTCACGGCTAACTACGTG

>562 len=155 tot-seq=108

TGAGGAATATTGGTCAATGGACGGAAGTCTGAACCAGCCATGCCGCGTGCAGGAAGACGG  
CTCTATGAGTTGTAAACTGCTTTTGTACAAGGGTAAACCTGAATACGTGTATTCAGCTGA  
AAGTATTGTACGAATAAGGATCGGCTAACTCCGTG

>563 len=137 tot-seq=108

TGGGGAATTTGCCGCAATGGGCGAAAGCCTGACGGAGCAATTCCGCGTGGAGCTGGAAGG  
CCTACAGGTCGTCAACTTGTTTTCTCGGAGAAGAAACAATGACGGTATCTGAGGAATAAG  
CATCGGCTAACTCTGTG

>564 len=161 tot-seq=108

TGGGGAATATTGCGCAATGGGGGAAACCCTGACGCAGCGACGCCGCGTGAGTGATGACGG  
TCTTCGGATTGTAAAGCTCTGTTAATCGGGACGAATGGTCGGTGTGCAAATAGTGCATGG  
ACATGACGGTACCGGAATAGAAAGCCACGGCTAACTACGTG

>565 len=138 tot-seq=108

TGGGGGATATTGCACAATGGGGGAAACCCTGATGCAGCGACGCCGCGTGGGTGAAGAAGT  
ATTCGGTATGTAAAGCCCTATCAGCAGGGAAGAAAGAAGACGGTACCTGACTAAGAAGC  
CCCGGCTAACTACGTGGG

>566 len=160 tot-seq=107

TGGGGAATTTTGGACAATGGGCGCAAGCCTGATCCAGCTATTCCGCGTGTGGGATGACGG  
CCCTCGGGTTGTAAACCACTTTAGTAGAGAACGAAAAGGAGCTATCGAATAAATAGCTCT  
GCTGACGGTACTCTAAGAATAAGCACCGGCTAACTACGTG

>567 len=161 tot-seq=107

TGAGGAATATTGGTCAATGGACGAAAGTCTGACGGAGCAACGCCGCGTGAGTGAAGACGG  
TCTTCGGATTGTAAAGCTCTGTTATACGGGACGAACGGCAAGGTGGTAAATAGCCATCAT  
GAGTGACGGTACCGTAAGAGAAAGCCACGGCTAACTACGTG

>568 len=113 tot-seq=107

CTTATGGAATGAATAGGTTGGTCGTAAGTGTTCCTCAGGAAATGAGACAGAGAAAGA  
GAAGACCGATGGGAGAGGAAGGGGGAGGGAAGAACTGAGAGGTGGCTGCCAG

>569 len=137 tot-seq=106

CAAGGAATTTTCCGCAATGGGCGCAAGCCTGACGGAGCAACGCCGCGTGCGGGATGACGC  
TTTTCGGAGTGTAAACCGCTGTTTCGTGGGGACGAAGCACTGACGGTACCCACGGAGGAAG  
GCCCCGCTAACTACGTG

>570 len=155 tot-seq=105

TGAGGAATATTGGTCAATGGGCGCGAGCCTGAACCAGCCAAGTAGCGTGAAGGATGACTG  
CCCTATGGGTTGTAAACTTCTTTTATATTAGAATAAAGTGCAGTATGTATACTGTTTTGT



ATGTATAATATGAATAAGGATCGGCTAACTCCGTG

>571 len=161 tot-seq=105

TAGGGAATATTGCGCAATGGACGAAAGTCTGACGCAGCCACGCCGCGTGAGTGAGGAAGG  
CCTTCGGGTTGTAAAGCTCTGTCATCCGGGAAAAACGGCTATCTGGGGAAAGTTCAGGTA  
GCGTGATGGTACCGGAGGAGGAAGCACCGGCAAACCTCTGTG

>572 len=155 tot-seq=104

TGAGGAATATTGGTCAATGGGCGCAAGCCTGAACCAGCCAAGTAGCGTGCAGGAAGACGG  
CCCTATGGGTTGTAAACTGCTTTTATACGAGAATAATTTGATGCACGTGTGCGTTATTGC  
ATGTATCGTATGAATAAGGACCGGCTAATCCGTG

>573 len=160 tot-seq=104

TGGGGAATTTTTCGCAATGCTCGTAAGAGTGACGCAGCGACGCCGCGTGAATGACGAAGG  
CCTTCGGGTCGTAAAGTTCTTTTCGACAGGGAAGAAAATGCCTATAAGTAACTGTGTATGT  
ATTGACGGTACCTGTATAAGCAGCCCCGGCTAACTCCGTG

>574 len=156 tot-seq=104

TGAGGAATATTGGTCAATGGGCGCAAGCCTGAACCAGCCAAGTCGCGTGAGGGAAGACGG  
TCCTATGGATTGTAAACCTCTTTTGTGCGGGGAGCAAAGCGCGGTACGAGTACCGTGAAGG  
AGAGTACCGAAGAAAAAGCATCGGCTAACTCCGTG

>575 len=135 tot-seq=103

TGGGGAATATTGCGCAATGGGGGAAACCCTGACGCAGCGACGCCGCGTGAACGATGAAGG  
TCTTCGGATCGTAAAGTTCTGTTGCAGGGGAAGATAATGACGGTACCCTGTGAGGAAGCC  
CCGGCTAACTACGTG

>576 len=204 tot-seq=102

CTCTCCGCTTTTGATCTTCCTAGCAGGTCCTGCGAGAGCCAGCATCAGCTCCCAGGGGGG  
GCAGGAGGCTCTACATCCATCGTCTCTGCAAAGCTCTTGGCACGGCCCTTGGCAGGCAG  
CAGGCACACAATAAATGGCATTTCACAGCCATGTGGGAAAGACCACATGCCAGGTGGGAC  
ACCTGGGGAGGCTGGGAAACTCGC

>577 len=135 tot-seq=102

TGGGGGATATTGCACAATGGGGGAAACCCTGATGCAGCGACGCCGCGTGAGTGAAGAAGT  
ATTTCCGGTATGTAAAGCTCTATCAGCAGGGAAGAAAATGACAGTACCTGACTAAGAAGCC

CCGGCTAACTACGTG

>578 len=139 tot-seq=101

TGGGGAATCTTGACAATGGGCGAAAGCCCGATCTAGCAATATCGCGTGAGTGAAGAAGG  
GCAATGCAGCTTATAAAGCTCTTTCATCGAGTGCGCGATCATGACAGGACTCGAGGAAGA  
AGCCCTGGCTAACTCCGTG

>579 len=207 tot-seq=101

TCAGAACACAGCAACGACCCTTTACATTACTCAAGAGGTCCTTCGGAAGTTTTGATGTCT  
GCCCTTTGCTTTCCTGGCCCGACCTCTCCCTCCCTAGAACGGAAAAGCCCGTGGATGCG  
CTGGAGCGTTCAGGGTGAACAAGCCTCCCTGCAACTTAAGATTCTTTATCACCCGCGC  
AGGGGAATTCATTTACGTTACTGGTA

>580 len=156 tot-seq=101

TGAGGAATATTGGTCAATGGAGGCAACTCTGAACCAGCCAAGTAGCGTGCAGGATGACGG  
CCCTATGGGTTGTAAACTGCTTTTATGCGGGGATAAACTGAGCCACGTGTGGCTTATTGC  
AGGTACCGCATGAATAAGGACCGGCTAATTCCGTGG

>581 len=135 tot-seq=99

TGGGGAATATTGGACAATGGGCGCAAGCCTGATCCAGCCATGCCGCGTGAGTGATGAAGG  
CCTTAGGGTTGTAAAGCTCTTTTATCCGGGACGATAATGACGGTACCGGAGGAATAAGCC  
CCGGCTAACTTCGTG

>582 len=225 tot-seq=99

CTGCAGCAGCGGCAACTGCTCGCATCCAGCCGGGCTCGGGTTACCGCCTTCTTCTTCTA  
GCATCTCCAGCCAGACAGGGAAAAGCTTGTTCAAGTTTGCAGCAGGACTCGGTCCCTGTG  
CGTGCGAACCTGGGGCTCCGGGACGGGCCTGCTCCCCGGCGTCCCCACCTCCAGTGTTTA  
AACAAGACCCGCAAACATTGCTTTCTCCAGGACTCTGCTTGAA

>583 len=175 tot-seq=99

TGGGGAATCTTGCGAATGGGGGGAACCCTGACGCAGCGACGCCGCGTGCGGGACGAAGG  
CCCTAGGGTCGTAAACCGCTTTCAGCAGGGAAGAGGCCGCGAGGTGACGGTACCTGCAGA  
AGAAGCCCCGGCTAAATACGTGCCAGCAGCCGCGGTCCCAGATCGGAAGAGCGTC

>584 len=159 tot-seq=98

TGGGGAATATTGGACAATGGGCGCAAGCCTGATCCAGCAATGCCGCGTGTGTGAAGAAGG

CCTTCGGGTTGTAAAGCACTTTAAGTTGGGAAGAAAAAACTCGCTCTAACACAGTGAGTC  
TTGACGGTACCGACAGAATAAGCACCGGCTAACTCTGTG

>585 len=161 tot-seq=98

TGGGGAATCTTCCGCAATGGACGAAAGTCTGACGGAGCAACGCCGCGTGAGTGATGACGG  
CCTTCGGGTTGTAAAGCTCTGTGATCGGGGACGAATGGCTGGTATGCTAATACCATATCA  
GAGTGACGGTACCCGAATAGCAAGCCACGGCTAACTACGTG

>586 len=174 tot-seq=97

CAGGTGCTACAAGGTAAGTCAAGGTCACGGCAAGAACCCCATAGGGGCCTGAGATTATCT  
GCTCACAAATGCTCTGTCTCACACTGGCTGTCTGCTTTGCTCCAGGGGCTCATCCCAG  
CGTTGGCCTCCCTCAGAGTCCCCTCCCTGCCACCCCATTCCTCCAACCCTAT

>587 len=156 tot-seq=97

TGAGGAATATTGGTCAATGGGCGGAAGCCTGAACCAGCCAAGTCGCGTGAGGGAAGACGG  
TCCTATGGATTGTAAACCTCTTTTGCAGGGGAGCAAGGCGCGGTACGTGTACCGCGAAGG  
AGAGTACCCTGAGAAAAAGCATCGGCTAACTCCGTG

>588 len=140 tot-seq=96

TGGGGAATATTGCACAATGGGCGCAAGCCTGATGCAGCGACGCCGCGTGAGGGATGACGG  
CCTTCGGGTTGTAAACCTCTTTTGCAGCACAGACGAAGCGCAAGTACGGTATGTGCAGAAG  
AAGGACCGGCCAACTACGTG

>589 len=154 tot-seq=95

TGAGGAATATTGGTCAATGGACGCAAGTCTGAACCAGCCATGCCGCGTGCAGGAAGACGG  
CTCTATGAGTTGTAAACTGCTTTTGTACGAGGGTAACAGCATCTACGCGTAGGTGCATGA  
AAGTATCGTACGAATAAGGATCGGCTAACTCCGT

>590 len=135 tot-seq=95

TGGGGAATATTGGACAATGGAGGGAAGTCTGATCCAGCAATTCTGTGTGTGTGAAGAAGG  
TTTTAGGACTGTAAACACTTTTGTAGTAGGGAAGAAAAAATGACGGTACCTACAGAAGAA  
GCAACGGCTAAATAC

>591 len=160 tot-seq=95

TGGGGAATATTGGACAATGGGCGAAAGCCTGATCCAGCCATGCCGCGTGTGTGAAGAAGG  
TCTTCGGATTGTAAAGCACTTTAAGTTGGGAGGAAGGGCAGTAAGTTAATACCTTGCTGT

TTTGACGTTACCAACAGAATAAGCACCGGCTAACTTCGTG

>592 len=142 tot-seq=95

TAGGGAATCTTCCACAATGGACGCAAGTCTGATGGAGCGACGCCGCGTGCGGGATGAAGG  
CCTTCGGGTTGTAAACCGCTTTCAGCAGGGACGAGGCCGCAAGGTGACGGTACCTGCAGA  
AGAAGCCCCGGCTAACTACGTG

>593 len=160 tot-seq=95

TGGGGAATATTGCACAATGGGCGCAAGCCTGATGCAGCCATGCCGCGTGTGTGAAGAAGG  
CCTTCGGGTTGTAAAGCACTTTCAGCGAGGAGGAAGGGCAGTGTGTTAATAGCACATTGC  
ATTGACGTTACTCGCAGAAGAAGCACCGGCTAACTCCGTG

>594 len=137 tot-seq=95

TGGGGAATATTGGGCAATGGGCGCAAGCCTGACCCAGCAACGCCGCGTGAAGGAAGAAGG  
CTTTCGGGTTGTAAACTTCTTTTCTCAGGGACGAACAGATGACGGTACCTGAGGAATAAG  
CCACGGCTAACTACGTG

>595 len=138 tot-seq=95

TGGGGAATATTGCACAATGGGGGAAACCCTGATGCAGCGACGCCGCGTGAGTGAAGAAGT  
ACCTCGGTACGTAAAGCTCTATCAGCAGGGAAGAAAGAAATGACGGTACCTGAGTAAGAA  
GCCCCGGCTAACTACGTG

>596 len=161 tot-seq=94

TGGGGAATCTTCCGCAATGGACGAAAGTCTGACGGAGCAACGCCGCGTGAACGAAGAAGG  
TCTTCGGATTGTAAAGTTCTGTGATTCGGGACGAAAGGGTTTGTGGTGAATAATCATAGA  
CATTGACGGTACCGAAAAAGCAAGCCACGGCTAACTACGTG

>597 len=155 tot-seq=94

TGAGGAATATTGGTCAATGGACGGAAGTCTGAACCAGCCAAGTAGCGTGCAGGATGACGG  
CCCTATGGGTTGTAAACTGCTTTTATACGGGGATAAAGTTAGGGACGTGTCCCTATTTGC  
AGGTACCGTATGAATAAGGACCGGCTAATTCCGTG

>598 len=157 tot-seq=94

TGAGGAATATTGGTCAATGGGCGAGAGCCTGAACCAGCCAAGTAGCGTGCAGGATGACGG  
CCCTATGGGTTGTAAACTGCTTTTATGTGGGGATAAAGTGAGCTACGTGTAGTTTATTGC  
AGGTACCACATGAATAAGGACCGGCTAATTCCGTGGG

>599 len=161 tot-seq=93

TGGGGAATCTCCGCAATGGGCGAAAGCCTGACGGAGCAACGCCGCGTGAGTGAAGAAGG  
TCTTCGGATTGTAAAGCTCTGTTGTACATGACGAATGTGCCGTTGTGAATAATGGCTGG  
TAATGACGGTAGTGTACGAGGAAGCCACGGCTAACTACGTG

>600 len=160 tot-seq=93

TAGGGAATTTTCGGCAATGGGGGGAACCCTGACCGAGCAACGCCGCGTGAAGGAGGAAGG  
TCTTCGGACTGTAAACTTCTGTTATAAAGGAAGAAAGGCGGATACAGGGAATGGTATCCG  
AGTGACGGTACTTTATGAGGAAGCCACGGCTAACTACGTG

>601 len=155 tot-seq=92

TGAGGAATATTGGTCAATGGGCGGGAGCCTGAACCAGCCAAGTAGCGTGAAGGACGACGG  
CCCTACGGGTTGTAAACTTCTTTTATAAGGGAATAAAGTTCGCCACGTGTGGTGTTTTGT  
ATGTACCTTATGAATAAGCATCGGCTAATTCCGTG

>602 len=135 tot-seq=91

TGGGGAATATTGCACAATGGGCGAAAGCCTGATGCAGCAACGCCGCGTGAGGGAAGACGG  
TTTTCGGATTGTAAACCTCTGTCTTTGGTGAAGATAATGACGGTAGCCAAGGAGGAAGCC  
ACGGCTAACTACGTG

>603 len=161 tot-seq=91

TGGGGAATATTGCACAATGGGCGCAAGCCTGATGCAGCGACGCCGCGTGAGTGAAGAAGG  
TTTTCGGATCGTAAAGCTCTGTTGTTAAGGAAGAACGAGTGTGAGAATGGAAAGTTCATG  
CTGTGACGGTACTTAACCAGAAAGGGACGGCTAACTACGTG

>604 len=155 tot-seq=89

TGAGGAATATTGGTCAATGGGCGGGAGCCTGAACCAGCCAAGTCGCGTGAAGGATGACTG  
CCCTACGGGTTGTAAACTTCTTTTATTGGGGAATAAAAAAGAGTATGTATACTCTATTGC  
ATGTACCTTATGAATAAGCATCGGCTAACTCCGTG

>605 len=149 tot-seq=89

TGGGGGATATTGCACAATGGAGGAAACTCTGATGCAGCGACGCCGCGTGAGTGAAGAAGT  
ATTCGGTATGTAAAGCTCTATCAGCAGGGAAGAAAGGCTCGTAAGAGAGATGACGGTAC  
CTGACTAAGAAGCCCCGGCTAACTACGTG

>606 len=138 tot-seq=89

TGGGGAATATTGGGCAATGGGGGAAACCCTGACCCAGCAACGCCGCGTGAGGGAAGAAGG  
TTTTCGGATTGTAAACCTCTGTCCTTAGGGACGAAGAAAGTGACGGTACCTAAGGAGGAA  
GCTCCGGCTAACTACGTG

>607 len=137 tot-seq=88

TGGGGAATATTGGGCAATGGGGGAAACCCTGACCCAGCAACGCCGCGTGGAGGAAGAAGG  
TCTTCGGATCGTAAACTCCTGTCCTAAGAGACGAGGAGAAGACGGTATCTTAGGAGGAAG  
CCCCGGCTAACTACGTG

>608 len=160 tot-seq=88

TGGGGAATATTGCGCAATGGGCGAAAGCCTGACGCAGCGACGCCGCGTGAGGGATGAAGG  
TTTTCGGATCGTAAACCTCTGTCAGAAGGGAAGAACTACGTTGTGCTAATCAGCAGCGT  
ACTGACGGTACCTTCAAAGGAAGCACCGGCTAACTCCGTG

>609 len=155 tot-seq=88

TGAGGAATATTGGTCAATGGTCGGAAGACTGAACCAGCCAAGTAGCGTGAAGGATGAAGG  
TTCTATGGATTGTAACTTCTTTTATACGGGAATAAAACCTCCCACGTGTTGGAGCTTGT  
ATGTACCGTATGAATAAGCATCGGCTAACTCCGTG

>610 len=152 tot-seq=88

TGGGGAATATTGCACAATGGGGGAAACCCTGATGCAGCGACGCCGCGTGAGTGAAGAAGT  
ATTTCCGGTACGTAAAGCTCTATCAGCAGGGAAGAAACACCGCCCTATGGGCGCTAGACGG  
TACCTGACTAAGAAGCCCCGGCTAACTACGTG

>611 len=216 tot-seq=87

CCAAGTGCCAGATTAAAGGTGTTAATCCTGCCACCACACTTGGCTTATCTTAACTTCA  
TAGAAGAATTTCAAAATTTTGCTAATTGCAGCTCAACAAATCATTTTTATAAGATAAGTA  
TCTTAGACCGTTGGCCCTTGTAAGACTACCTAAGGCAGGATAACGTATGAGCTGTCGGAA  
GTCCCGCAGGTTGGGTGGAGGTCCAGAGTAAAGGTC

>612 len=160 tot-seq=87

TAGGGAATCTTCGGCAATGGGCGAAAGCCTGACCGAGCAACGCCGCGTGAATGATGAAGG  
CCTTCGGGTTGTAAATTCTGTTATAAGGGAAGAACGACTTTAGTAGGAAATGGCTAGAG  
TGTGACGGTACCTTATGAGAAAGCCACGGCTAACTACGTG

>613 len=160 tot-seq=87

TGGGGAATATTGCACAATGGGGGAAACCCTGATGCAGCAACGCCGCGTGAGTGAAGAAGG  
GTTTCGGCTCGTAAAGCTCTGTTGGTAGTGAAGAAAGATAGAGGTAGTAACTGGCCTTTA  
TTTGACGGTAATTACTIONTAGAAAGTCACGGCTAACTACGTG

>614 len=154 tot-seq=87

TGGGGAATATTGCGCAATGGGGGAAACCCTGACGCAGCGACGCCGCGTGCGGGATGAAGG  
CCTTCGGGTTGTAAACTGCTTTTGTGGGAATAATCGACATTACGTGTAATGTTTTGCA  
TGTACCATTGAATAAGGACCGGCTAATCCGTG

>615 len=155 tot-seq=87

TGAGGAATATTGGTCAATGGACGCAAGTCTGAACCAGCCAAGTAGCGTGCAGGATGACGG  
CCCTATGGGTTGTAAACTGCTTTTATATGGGAATAAAGTGAGGGACGTGTCCCTTATTGC  
ATGTACCATATGAATAAGGACCGGCTAATCCGTG

>616 len=135 tot-seq=86

TGAGGAATATTGGTCAATGGGCGAGAGCCTGATGCAGCGACGCCGCGTGAGCGAAGAAGT  
ATTTCCGGTATGTAAAGCTCTATCAGAAGGGAAGAAAATGACGGTACCTTACTAAGAAGCT  
CCGGCTAAATACGTG

>617 len=157 tot-seq=86

TGGGGAATATTGCACAATGGGCGCAAGCCTGATGCAGCGACGCCGCGTGAGGGATGGAGG  
CCTTCGGGTTGTAAACCTCTTTCCAGTGAAGCAGGCCTGTCCCTTTGTGGGTGGGTT  
GACGGTAGCTGGATAAGAAGCGCCGGCTAACTACGTG

>618 len=135 tot-seq=86

TGGGGGATATTGCACAATGGGGGAAACCCTGATGCAGCGACGCCGCGTGAGTGAAGGAGT  
ACTCCGGTATGTAAAGCTCTATCAGCAGGGAAGAAGCAAGACGGTACCTGACCAAGAAGC  
CCCGGCTAACTACGT

>619 len=137 tot-seq=86

TGGGGAATATTGGGCAATGGGGGAAACCCTGACCCAGCAACGCCGCGTGAGGGAAGAAGG  
TTTTCGGATTGTAAACCTCTGTCTCCGGGACGAAGAAGTACGGTACCGGGGGAGGAAG  
CTCCGGCTAACTACGTG

>620 len=210 tot-seq=85

TGGGCCCCCTCCCTTCCCAAATCTAGGTCCTTGTGAAACTGTACCCAATAAAGTACAAT

GGAAACGGCATAGATTTAAGAACCTGGGAGAATGGGAGTCTACTACTTACTTGGTGACTT  
GTTCCCTGAACCTAGTCCGAAGACAGAAAGAAGCACCAAGACAACAGTAGACAAAAACAA  
GGAGGGCAGGAGTTGTAATACTAAGCAAAG

>621 len=153 tot-seq=85

TGGTGGTGGTAGATGGGGAAGCCTCTCCTCAGGGCACATGCAAGTGCACTGTGCACCTGC  
TACTCTGGAAGGTAAGGTTGCTGTCAAGTGGCAGCAGTGTACCAGGGCTGGTGTCACTGC  
CAGTAGCTTGCACTTTATCTATAGCAGCAGCAT

>622 len=138 tot-seq=85

TGGGGAATATTGGACAATGGAGGCAACTCTGATCCAGCAATTCTGTGTGTGTGAAGAAGG  
TTTTAGGACTGTAAACACTTTTTAGTAGGGAAGAAAGAAATGACGGTACCTACAGAAGAA  
GCGACGGCTAAATACGTG

>623 len=216 tot-seq=85

GACCCCCCCTTGTAGGCCACCGAGGGCATGTGCACTGCTGGCTGCTCCCCATATCAGA  
AACCTGAGACCCAAGGGGCTACTATCTTGGGAACAGGCGGTCAGCCAACCCTGATAAGAG  
GTTCTGCCCGGAGTGTCTCACAACACCCTGTCATCAGAGGGCTGTGCTGGGTCACGAG  
GCAGCCAAACCACTGCCCTGCAGGACTGGGGGTTGT

>624 len=155 tot-seq=85

TGAGGAATATTGGTCAATGGACGAGAGTCTGAACCAGCCAAGTAGCGTGAAGGATGACTG  
CCCTATGGGTTGTAAACTTCTTTTATACGGGAATAAAGTGGAGTATGCATACTCCTTTGT  
ATGTACCGTATGAATAAGGATCGGCTAACTCCGTG

>625 len=156 tot-seq=84

TGAGGAATATTGGTCAATGGACGAGAGTCTGAACCAGCCAAGTAGCGTGAGGGATGACTG  
CCCTATGGGTTGTAAACCTCTTTTATATGGGAATAACAGAGATTACGTGTAGTCTTTTGC  
ATGTACCATTATGAATAAGCATCGGCTAACTCCGTG

>626 len=167 tot-seq=83

TGAGGAATATTGGTCAATGGACGAGAGTCTGAACCAGCCAAGTAGCGTGCAGGATGACGG  
CCCTATGGGTTGTAAACCGCTTTTGATTGGGAGCAAGCCTTCGGGTGAGTGTACCTTTGC  
AATAAGCGCCGGCTAACTACGTGGGGGGAGCCGCGGAACGCGAGATT

>627 len=139 tot-seq=83



TGGGGAATATTGCACAATGGGCGAAAGCCTGATGCAGCGACGCCGCGTGAGGGATGACGG  
CCTTCGGGTTGTAAACCTCTTTCAGTAGGGAAGAAGCGAAAGTGACGGTACCTGCAGAAG  
AAGCACCGGCTAACTACGT

>628 len=242 tot-seq=83

GGAGGGGGCAGCGCCTGTCTCCCTGGAGAAGAAAGGCTCACCTGAGAAATCCGTGTGGC  
CAGCATGGTGGTGAGGATGGCTCCCTGGGGAGAGACACAGATAAAACCGGGGCTATCCCA  
TCAGTGTTCCCTGCTGGCTTCTGGCCAGGATAAGACCCCTGTCCTCCTGCCAGATGCTC  
AGCCTCATTGTCATGAGGCTGACATGACCTCAGCCTTCCAGAGAGGCAAGAGCTCCAGGA  
AG

>629 len=160 tot-seq=82

TGGGGAATATTGGACAATGGGCGCAAGCCTGATCCAGCCATACCGCGTGGGTGAAGAAGG  
CCTTCGGGTTGTAAAGCCCTTTTGTGGGAAAGAAAAGCAGTCGGTTAATACCCGGTTGT  
TCTGACGGTACCCAAAGAATAAGCACCGGCTAACTTCGTG

>630 len=135 tot-seq=82

TGGGGAATATTGCACAATGGGGGAAACCCTGATGCAGCGATGCCGCGTGGAGGAAGAAGG  
TTTTCGGATTGTAAACTCCTGTTGAAGAGGACGATAATGACGGTACTCTTTTAGAAAGCT  
CCGGCTAACTACGTG

>631 len=138 tot-seq=82

TGGGGAATATTGCACAATGGGGGGAACCCTGATGCAGCAACGCCGCGTGAGTGAAGAAGG  
CATTCTGTGTCGTAAACTCTGTAGTAGGGGAAGAAAGAAATGACAGTACCCTAAAAGAAA  
GCCCCGGCTAACTACGTG

>632 len=161 tot-seq=82

TAGGGAATCTTCGGCAATGGGGGCAACCCTGACCGAGCAACGCCGCGTGAGTGAAGAAGG  
TTTTCGGATCGTAAAGCTCTGTTGTTAGAGAAGAACGGTAATGGGAGTGGAAAATCCATT  
ACGTGACGGTAACTAACCAGAAAGGGACGGCTAACTACGTG

>633 len=161 tot-seq=81

TGGGGAATCTTCGCAATGGGCGAAAGCCTGACGGAGCAATGCCGCGTGAGTGATGAAGG  
AATTCGTTCCGTAAAGCTCTTTTGTATGACGAATGTGCAGATTGTAAATAATGATTTG  
TAATGACGGTAGTAAACGAATAAGCCACGGCTAACTACGTG

>634 len=132 tot-seq=80

TGGGGAATATTGCACAATGGGGGAAACCCTGATGCAGCGACGCCGCGTGATTTAGAAGGC  
CTTCGGGTTGTAAAAATCTTTTCTATGGGAAGAAAATGACAGTACCATAGGAATAAGGAC  
CGGCTAATTACG

>635 len=160 tot-seq=80

TGGGGAATTTTGGACAATGGGCGAAAGCCTGATCCAGCCATTCCGCGTGAGTGAAGAAGG  
CCTTCGGGTTGTAAAGCTCTTTGCAAGGAAAGAAACTTACTTAATACTAGGTGAG  
GATGACGGTACCTTGATAAGAAGCACCGGCTAACTACGTG

>636 len=155 tot-seq=80

TGAGGAATATTGGTCAATGGCCGAGAGGCTGAACCAGCCAAGTCGCGTGAGGGATGACGG  
TCCTATGGATTGTAAACCTCTTTGTCGGGGAGCAAAGGACGCCACGTGTGGTGTTTTGC  
GAGTACCCGAAGAAAAGCATCGGCTAACTCCGTG

>637 len=156 tot-seq=79

TGAGGAATATTGGTCAATGGGCGGAAGCCTGAACCAGCCAAGTCGCGTGAGGGATTAAGG  
CCCTGCGGGTCGTAAACCTCTTTGCCGGGGAGCAGTGGTCCGGACGCGTCCGGGCCGGG  
AGAGTACCCGGAGAAAAGCATCGGCTAACTCCGTG

>638 len=144 tot-seq=79

TGGGGAATATTGCACAATGGGCGCAAGCCTGATGCAGCGACGCCGCGTGCGGGATGGAGG  
CCTTCGGGTTGTAAACCGCTTTTGATCGGGAGCAAGCCCTTCGGGGTGAGTGTACCCTTC  
GAATAAGCACCGGCTAACTACGTG

>639 len=117 tot-seq=79

GTGCAAACCTCAGAGGTTGAACGCTTGGGAGCGTTTGGAGAAGGGCAGGGCCAGGACGCA  
GGAAGGAATGAAGTGAGAACGTTGGTGAAGGCGGAAGGGAGACACAAAGCCTCATGC

>640 len=221 tot-seq=79

GTGTTAGTCGGGTCTGCAGCTGGGTAGTAACAGAGGAAGCGTTAGGGATGGAAAGCAAAC  
TGTCTGCTTTCTAATGACTCAGTCACTGTGGAGAGGTCCTCCCAGTTGGACTGACCACAG  
TGGGCTCGCACAGATACTCCTTTTGATTCTTTGTTTCCTGTTCTAGCTGCCGGACCACTG  
GGAGAAAGCTGTCATCACTGTACAGCGGCCGGGGAAGATTC

>641 len=155 tot-seq=79

TAGGGAATCTCCACAATGGACGCAAGTCTGAACCAGCCAAGTAGCGTGCAGGATGACGG  
CCCTATGGGTTGTAAACTGCTTTTATATGGGGATAAAGTGGGGAACGTGTTCCCTTTTGC  
AGGTACCATATGAATAAGGACCGGCTAATTCCGTG

>642 len=149 tot-seq=78

TCTTAAACAGATAATTTTCATCTCTCTGGGACTCACTTTTCTCATTAAAAAAAAGTGGGG  
TGGCATCTCCCTTGCTTAATAACAGCCAAAGGTTTCTTCGAGAATTCTGTCAGGTCATAA  
ATGGACAAGCCATGTGAATAATGAATTAT

>643 len=160 tot-seq=77

TGGGGAATATTGCGCAATGGGGGAAACCCTGACGCAGCCATGCCGCGTGAATGAAGAAGG  
CCTTCGGGTTGTAAAGTTCTTTTCGGTATTGAGGAAGGGATGTGTGTTAATAACATACATT  
ATTGACGTAAATACAGAAGAAGCACCGGCTAACTCCGTG

>644 len=135 tot-seq=77

TGGGGAATATTGCGCAATGGGGGAAACCCTGACGCAGCAACGCCGCGTGAGTGAGGAAGT  
ATCTCGGTATGTAAAGCTCTATCAGCGGGGAAGAAAGAGGACGGTACCCGACTAAGAAGC  
CCCGGCTAACTACGT

>645 len=137 tot-seq=77

TGGGGAATATTGGGCAATGGGCGAAAGCCTGACCCAGCAACGCCGCGTGAAGGAAGAAGG  
CCTTCGGGTTGTAAACTTCTTTTAAGAGGGACGAAGAAGTGACGGTACCTCTTGAATAAG  
CCACGGCTAACTACGTG

>646 len=135 tot-seq=77

TGGGGAATATTGCACAATGGGGGAAACCCTGATGCAGCGACGCCGCGTGAGCGATGAAGT  
ATCTCGGTATGTAAAGCTCTATCAGCAGGGAAGAAAACGACAGTACCTGACTAAGAAGCC  
CCGGCTAACTACGTG

>647 len=160 tot-seq=76

TAGGGAATTTTCGGCAATGGGCGAAAGCCTGACCGAGCAATGCCGCGTGAATGAAGAAAT  
TCTTCGGAATGTAAAATTCTGTGGTGAGGGAAGAAAGGTATTAGAAGGAAATGGCTAATA  
TTTGACGGTACCTTACTAGAAAGCCCCGGCTAACTATGTG

>648 len=161 tot-seq=76

TAGGGAATCTTCGGCAATGGGGGCAACCCTGACCGAGCAACGCCGCGTGAGTGAAGAAGG

TTTTCGGATCGTAAAACCTCTGTTGTTAGAGAAGAACGTTAAGTAGAGTGAAAAATTACTT  
AAGTGACGGTATCTAACCCAGAAAGGGACGGCTAACTACGTG

>649 len=140 tot-seq=76

TGGGGAATCTTGACAATGGGCGAAAGCCTGATGCAGCGACGCCGCGTGCGGGACGAAGG  
CCTTCGGGTTGTAAACCGCTTTCAGCAGGGACGAGGGCGAAAGTGACGGTACCTGCAGAAG  
AAGCCCCGGCTAACTACGTG

>650 len=142 tot-seq=75

TGGGGAATCTTCCGCAATGGACGAAAGTCTGACGGAGCAACGCCGCGTGAGTGATGACGG  
TCTTCGGGTTGTAAACCGCTTTTGATTGGGAGCAAGCTTTCGGGTGAGTGACCTTTTGA  
ATAAGCGCCGGCTAACTACGTG

>651 len=135 tot-seq=75

TGGGGAATCTTCCGCAATGGACGAAAGTCTGACGGAGCAACGCCGCGTGAGCGAAGAAGT  
ATTTCCGGTATGTAAAGCTCTATCAGAAGGGAAGAAAATGACGGTACCTTACTAAGAAGCT  
CCGGCTAAATACGTG

>652 len=155 tot-seq=75

TGAGGAATATTGGTCAATGGCCGTAAGGCTGAACCAGCCAAGTAGCGTGAGGGAAGACTG  
CCCTATGGGTTGTAAACCTCTTTTATGCGGGGATAAAGGTGTCCACGTGTGGATGTTTGC  
AGGTACCGCATGAATAAGGACCGCTAATTCCGTG

>653 len=199 tot-seq=75

CTGCATTTGTTAGGGTTGAGCAGTATAAGGGAGGCTCCGTGAGGAAGTCCTTTGTCCCGG  
GGAAGTGAAACCAGGAGTGGTTCTCAACTGAAGCTGGACAGAGGGACAGAATGTGAAGGC  
GCCTTCGAATCTCTCCATGGCAAGCACATACACAGTGATAAGTAATTGCTAACGGAAGGA  
GCCAATGAAAGGCCGACTC

>654 len=155 tot-seq=75

TGAGGAATATTGGTCAATGGGCGCAGGCCTGAACCAGCCAAGTAGCGTGAAGGATGACTG  
CCCTATGGGTTGTAAACTTCTTTTATATGGGAATAAAGTTTTCCACGTGTGGAATCTTGT  
ATGTACCATATGAATAAGGATCGGCTAACTCCGTG

>655 len=155 tot-seq=75

TGAGGAATATTGGTCAATGGGCGGGAGCCTGAACCAGCCAAGGCCGCGTGAGGGAAGAAGG

TACAGCGTATCGTAAACCTCTTTTGTGTCAGGGAACAAAGGCGGGGACTAGTCCCCGGATGA  
GGGTACCTGAAGAAAAAGCATCGGCTAACTCCGTG

>656 len=155 tot-seq=75

TGAGGAATATTGGTCAATGGCCGAGAGGCTGAACCAGCCAAGTCGCGTGAGGGAAGACGG  
CCCTACGGGTTGTAAACCTCTTTTGTGCGGGGAGCAAAGCGAACCACGTGTGGTTCATTGA  
GAGTACCCGAAGAAAAAGCATCGGCTAACTCCGTG

>657 len=139 tot-seq=74

TGGGGAATATTGGACAATGGACCAAAAAGTCTGATCCAGCAATTCTGTGTGCACGATGAAG  
TTTTTCGGAATGTAAAGTGCTTTCAATTGGGAAGAAGAAAGTGACGGTACCAACAGAAGA  
AGTGACGGCTAAATACGTG

>658 len=160 tot-seq=74

TGGGGAATCTTCCGCAATGGGCGAAAGCCTGACGGAGCAATGCCGCGTGAAACGAAGAAGG  
TCTTCGGATTGTAAAGTTCTGTCCTTATCGAAGAGAGGCAAATGGAGTAACTGCCATATG  
CAGGACGGTAGATGAGGAGGAAGCCCCGGCTAACTACGTG

>659 len=135 tot-seq=74

TGGGGAATATTGCACAATGGGGGAAACCCTGATGCAGCGATGCCGCGTGGAGGAAGAAGG  
TTTTTCGGATTGTAAACTCCTGTCTTAAAGGACGATAATGACGGTACTTTAGGAGGAAGCT  
CCGGCTAACTACGTG

>660 len=155 tot-seq=74

TAAGGAATATTGGTCAATGGACGAAAGTCTGAACCAGCCATGCCGCGTGGAGGATGAAGG  
TCCTCTGGATTGTAAACTTCTTTATTTGGGAAGAAACCCACGATTTCTATTGTGGTTGA  
CGGTACCAGATGAATAAGCACCGGCTAACTCCGTG

>661 len=141 tot-seq=74

TGGGGAATATTGCACAATGGGCGCAAGCCTGATGCAGCAACGCCGCGTGCGGGATGACGG  
CCTTCGGGTTGTAAACCGCTTTCAGCAGGGACGAAGCTTTTTGTGACGGTACCTGCAGAA  
GAAGCACCGGCTAACTACGTG

>662 len=160 tot-seq=73

TGGGGAATATTGCACAATGGGCGCAAGCCTGATGCAGCCATGCCGCGTGTGTGAAGAAGG  
CCTTCGGGTTGTAAAGCACTTTCAGCGGGGAGGAAGGCGCCAAGGTTAATAACCTTGCGG

ATTGACGTTACCCGCAGAAGAAGCACCGGCTAACTCCGTG

>663 len=160 tot-seq=73

TAGGGAATCTTCCACAATGGGCGCAAGCCTGATGGAGCAACGCCGCGTGAGTGAAGAAGG

TTTTCGGATCGTAAACTCTGTTGTTAGAGAAGAACAAGGACGTTAGTAACTGAACGTCC

CCTGACGGTATCTAACCAGAAAGCCACGGCTAACTACGTG

>664 len=170 tot-seq=72

GAAGGCATTAAACCCCTTAGGAGTCTTCATCCAGACACAAATCCTGTACTAAGGATGATA

AAGGAGATCTGCACCCTGTACCTTAATAACGCACCAGTGTGGCACAGAGATACACCTATA

AAGCGGTGTGGGCACCTGCACGCACCCAGTGTGTTTACATCACACACAGT

>665 len=119 tot-seq=72

TTGCTTTTGTGCAATGGATGGAATGACTCAGCCTGCCTGTGATTACCCTTTCACTTTCTG

CCTTGCTTCTGAATCCAAGTTCACTTAATTGAGGTGTGTGGGCCCTTGCTCTCGACCCA

>666 len=161 tot-seq=72

TGGGGAATCTCCGCAATGGACGAAAGTCTGACGGAGCAACGCCGCGTGAATGATGACGG

CCTTCGGGTTGTAAAGTTCTGTTATACGGGACGAATGGCGTAGCGGTCAATACCCGTTAC

GAGTGACGGTACCGTAAGAGAAAGCCACGGCTAACTACGTG

>667 len=138 tot-seq=72

TGGGGAATATTGGGCAATGGGGGCAACCCTGACCCAGCGACGCCGCGTGAGGGAAGACAG

CCTTCGGGTTGTAAACCTCTGTTGCAGGGGAAGAAGGACGTGACGGTACCCTGCGAGGAA

GCTCCGGCTAACTACGTG

>668 len=163 tot-seq=72

TAGGGTGAGGCCTCTGAGGTGGTGGGGAACAGTGTGGAAACCAGGAAGGAGTGCGGAGCT

TGCAGGTGAAGGGAGATCTCGTGTGGTCAGGGAGGGTGACTCGTGCGGGTGGTGGTGTCA

TGAACCGAGATCAATGGCAGGAAGTCCCGTGTCTTTGTGCAG

>669 len=132 tot-seq=72

GAGGGGTCGGGAGGGGAAGACCGGGGCCAGCTGGAGGCAGAAGTCATCTGACCCAGTCTG

TGGCAAAAAGGGGACCAAGGTCAGCGAGAAAGGAGAGAAGAGGTATGGGATCCGGACAGC

CGAATCGAGAAC

>670 len=161 tot-seq=71

TGGGGAATCTTCGCAATGGACGAAAGTCTGACGGAGCAACGCCGCGTGAGTGATGACGG  
CCTTCGGGTTGTAAAGCTCTGTTAATCGGGACGAATGGTCTTTATGTGAATAATGTAAAG  
ATTTGACGGTACCGGAATAGAAAGCCACGGCTAACTACGTG

>671 len=155 tot-seq=71

TGAGGAATATTGGACAATGGGTGAGAGCCTGATCCAGCCATCCCGCGTGAAGGATGACGG  
TCCTATGGATTGTAACTTCTTTGTACAGGGATAAACCTACTCTCGTGAGGGTAGCTGA  
AGGTACTGTACGAATAAGCACCGGCTAACTCCGTG

>672 len=137 tot-seq=71

TGGGGAATATTGGGCAATGGGGGAAACCCTGACCCAGCAACGCCGCGTGAAGGAAGAAGG  
CCTTCGGGTTGTAACTTCTTTACCAGGGACGAATAAATGACGGTACCTGGAGAAAAAG  
CAACGGCTAACTACGTG

>673 len=135 tot-seq=71

TGGGGAATATTGCACAATGGGGGAAACCCTGATGCAGCGACGCCGCGTGAGTGAAGAAGT  
AATTCGTTACGTAAAGCTCTATCAGCAGGGAAGAAGAATGACGGTACCTGATTAAGAAGC  
CCCGGCTAACTACGT

>674 len=160 tot-seq=70

TAGGGAATCTTCGCAATGGGCGAAAGCCTGACGGAGCAACGCCGCGTGAGTGATGAAGG  
TCTTCGGATCGTAAACTCTGTTATCAGGGAAGAACAACGTGTAAGTAACTGTGCACGT  
CTTGACGGTACCTGATCAGAAAGCCACGGCTAACTACGTG

>675 len=137 tot-seq=70

TGGGGAATATTGCACAATGGGCGAAAGCCTGATGCAGCAACGCCGCGTGAAGGAAGAAGG  
GTTTCGGCTCGTAAACTTCTATCAACAGGGACGAAAGAAATGACGGTACCTGAATAAGAA  
GCCCCGGCTAACTACGT

>676 len=134 tot-seq=70

TAGGGAATCTTCGCAATGGGGGAAACCCTGATGCAGCGACGCCGCGTGATTTAGAAGGC  
CTTCGGGTTGTAAAAATCTTTTGTATGGGAAGAAAATGACAGTACCATAACGAATAAGGAC  
CGGCTAATTACGTG

>677 len=138 tot-seq=70

TGGGGAATATTGGACAATGGGGGAAACCCTGATCCAGCGACGCCGCGTGAGTGAAGAAGT

ATTCGGTATGTAAAGCTCTATCAGCAGGGAAGAAAAAATGACGGTACCTGACTAAGAA  
GCCCCGGCTAACTACGTG

>678 len=137 tot-seq=68

TGAGGAATTTTCCGCAATGGGCGAGAGCCTGACGGAGCAATGCCGCGTGGAGGATGAAGG  
CCCGTGGGTTGTAAACTCCTTTCTTAGAGAAGAAGCCCTGACGGTATCTAAGGAATAAG  
CATCGGCTAACTCCGTG

>679 len=162 tot-seq=68

GGTCCGTTTAACCCAGCCTGACCTCCTTGTTCAACACCATCACCCGCCCCAGCTCCTAC  
TTGGCCAACTCACACTGGCACAGAGCGCAGTGGGGAAGGCTGGAGCGAAAAGTGGAGAG  
GCCAAGGAAGGCTTCCAGTGCTGCAGGCTTCTAGGATCTACA

>680 len=140 tot-seq=67

TGGGGAATATTGCACAATGGGCGAAAGCCTGATGCAGCGACGCCGCGTGGGGGATGACGG  
TCTTCGGATTGTAAACCCCTTTCAGTAGGGACGAAGCGCAAGTACGGTACCTGCAGAAG  
AAGCACCGGCCAACTACGTG

>681 len=160 tot-seq=67

TGGGGAATCTTCCGCAATGGGCGAAAGCCTGACGGAGCAATGCCGCGTGAGTGAAGAAGG  
CCTTCGGGTTGTAAACTCTGTCCTAGACGAAGAGAGAGTATTGTAGTAACTGACAATAC  
TAGGACGGTAGACTAGGAGGAAGCTCCGGCTAACTATGTG

>682 len=161 tot-seq=67

TAGGGAATTTTCCACAATGGACGAAAGTCTGATGGAGCAACGCCGCGTGAACGATGAAGG  
TCTTCGGATTGTAAAGTTCTGTTGTCAGGGACGAACACGTGCCGTTTCAATAGGGCGGTA  
CCTTGACGGTACCTGACGAGAAAGCCACGGCTAACTACGTG

>683 len=184 tot-seq=67

GAGGAGTCAGCACATCTGTGAGAGAGTGAAGATCCCATGCAGGTTGGAACGGCTGCTGCC  
AAAAGTGAGCGGAGCTCAGAAGGGCAGGAATGCGCAGCCATGGCTGCCTCTTGAGGGCGA  
GGGTAGGAGGCTGTGCATTTCTCAGCAGCACACAGCGTGGCTGTGCGGTTCCCCCACT  
GCCA

>684 len=160 tot-seq=67

TGGGGAATATTGCGCAATGGGGGAAACCCTGACGCAGCGACGCCGCGTGCGGGATGAAGG



CCTTCGGGTTGTAAAGCTCTGTTGTTGGTGAAGAAGGACAGGGGTAGTAACTGACCTTTG  
TTTGACGGTAATCAATTAGAAAGTCACGGCTAACTACGTG

>685 len=138 tot-seq=66

TGGGGAATATTGGACAATGGAGGTA ACTCTGATCCAGCAATTCTGTGTGCACGAAGAAGG  
TTTTCGGATTGTAAAGTGCTTTTCAGTAGGGAAGAAGAAAGTGACGGTACCTACAGAAGAA  
GCGACGGCTAAATACGTG

>686 len=107 tot-seq=66

TAGATGACACACTGGACGAGGTCCCAGAAGATCCC GTTGAGGCGCCAGGCTGTCCAGATG  
TGGAGGCAGGTGCTGAGGTTGCATTAGCGGCTTCCCTCAGGCCACTC

>687 len=160 tot-seq=66

TGGGGAATATTGCACAATGGGCGCAAGCCTGATGCAGCCATGCCGCGTGTGTGAAGAAGG  
CCTTCGGGTTGTAAAGCACTTTTCAGTCAGGAGGAAAGCGTGGTGGTTAATACCCATCATG  
TGTGACGTTACTGACAGAAGAAGCACCGGCTAACTCCGTG

>688 len=144 tot-seq=66

TGGGGAATATTGCACAATGGGCGCAAGCCTGATGCAGCGACGCCGCGTGGGGGATGAAGG  
CCTTCGGGTTGTAAACTCCTTTTCGCTAGGGAAGAAGCCACTTGTGGTGACGGTACCTGGA  
TAAGAAGCACCGGCTAACTACGTG

>689 len=160 tot-seq=66

TGGGGAATTTTGGACAATGGGGGCAACCCTGATCCAGCCATGCCGCGTGCGGGAAGAAGG  
CCTTCGGGTTGTAAACCGCTTTTGTTCAGGGAAGAAATCCTTTGGGCTAATAACTCGGAGG  
GATGACGGTACCTGAAGAATAAGCACCGGCTAACTACGTG

>690 len=143 tot-seq=65

TAGGGAATCTTCCACAATGGACGCAAGTCTGATGGAGCAACGCCGCGTGAGTGAAGAAGG  
GTTTCGGGTTGTAAACCGCTTTTGTTCAGGGAAGAAATCCTTTGGGCTAATAACTCGGAGG  
ATAAGCGCCGGCTAACTACGTGG

>691 len=161 tot-seq=65

TAGGGAATCTTCCGAATGGACGAAAGTCTGACGGAGCGACGCCGCGTGAGCGAAGAAGG  
TCTTCGGATCGTAAAGCTCTGTTGTTAGGGAAGAAGAAGTACCGTTTGAATAGGGCGGTA  
CGGTGACGGTACCTAACGAGAAAGCCCCGGCTAACTACGTG

>692 len=160 tot-seq=65

TAGGGAATCTCCGCAATGGACGAAAGTCTGACGGAGCAACGCCGCGTGAGCGAAGAAGG  
CCTTCGGGTCGTAAAGCTCTGTTGTTAGGGAAGAACAAGTAACGCAGTAACTGGCGTTAC  
CGTGACGGTACCTAACGAGAAAGCCACGGCTAACTACGTG

>693 len=138 tot-seq=65

TGGGGAATATTGGGCAATGGGCGCAAGCCTGACCCAGCAACGCCGCGTGAAGGAAGAAGG  
CCCTCGGGTTGTAAACTTCTTTTATTCGGGACGAAACAAATGACGGTACCGAATGAATAA  
GCCACGGCTAACTACGTG

>694 len=137 tot-seq=64

TGGGGAATATTGGGCAATGGAGGCAACTCTGACCCAGCAATGCCGCGTGAGTGATGAAGG  
TAATTTTATTGTAAAGCTCTTTTCTTTGGAACGAATAAATGACGGTACCAAAGGAATAAG  
CCCCGGCTAACTACGTG

>695 len=142 tot-seq=64

TGGGGAATTTTGGACAATGGGGGCAACCCTGATCCAGCCATGCCGCGTGCGGGATGAAGG  
CCTTCGGGTTGTAAACCGCTTTTGATTGGGAGCAAGCTTTCGGGTGAGTGTACCTTTCGA  
ATAAGCGCCGGCTAACTACGTG

>696 len=144 tot-seq=64

TGGGGAATATTGCACAATGGGCGCAAGCCTGATGCAGCGACGCCGCGTGAGGGATGACGG  
CCTTCGGGTTGTAAACCTCTTTCAGCAGGGAAGCAGCCCCTCGGGGTGACGGTACCTGCA  
GAAGAAGCGCCGGCTAACTACGTG

>697 len=155 tot-seq=64

TGAGGAATATTGGTCAATGGCCGAAGGGCTGAACCAGCCAAGTCGCGTGAGGGAAGACGG  
CCCTACGGGTTGTAAACCTCTTTTGCCGGGGAGCAAAGGCGGTCACTGGTGACCGGATGA  
GAGTACCCGGAGAAAAAGCATCGGCTAACTCCGTG

>698 len=160 tot-seq=63

TAGGGAATCTCCGCAATGGGCGCAAGCCTGACGGAGCAACGCCGCGTGTGTGAAGAAGG  
TCTTCGGATCGTAAAGCACTGTTGTTAGAGAAGAACGACCGCTAGAGTAACTGTTAGCGG  
AGTGACGGTATCTAACCGAAAGCCACGGCTAACTACGTG

>699 len=238 tot-seq=63

ACCTTACGGGGCCGGGGGAAGCGGGGAGCAGTCAGGGCTGTCAGGGACACAGGCTCAAG  
CAGAAGGTGCGGCTGACTGAGAGAGGGAGGACTTGGGGGCTGTGCCTTTATTGGGGTCCA  
TGGGTGTTTTCCCTAGGCCTTCCCTGTGCAGGTGTGGATGGGCGACTGTAAAGAAACCA  
CGGCAAAGCGAGGAACTTTGTTATAGTTTCTGGTGCTGACCAGGAGGCTTCACCACCA  
>700 len=191 tot-seq=62

GCCAGTGCTCTACCACTGTGCCCTACATTTCTAGCTCTCGGCCTCCCTTACAGGCTTCTG  
TGGATCTCACATGCTCATAACAGCTCACGGCTAGCCACCTTTTAAAGGCAGAGATTGAGA  
ATGTGAGAGTCAACCACTAGGTCAACAAGAAGGCTGAATCCCAGCCGGGCGTGGTGGCGCA  
CACCTTTAATC

>701 len=155 tot-seq=62

TGAGGAATATTGGTCAATGGGCGAGAGCCTGAACCAGCCAAGTAGCGTGAGGGAAGACTG  
CCCTATGGGTTGTAAACCTCTTTTGTGCGGGGATAAAGTGAGGGACGTGTCCCTCATTGC  
AGGTACCGCACGAATAAGGACCGGCTAATTCCGTG

>702 len=155 tot-seq=62

TGAGGAATATTGGTCAATGGGCGAGAGCCTGAACCAGCCAAGTCGCGTGAAGGATGACTG  
CCCTATGGGTTGTAAACTTCTTTTACAGGGGAATAAAATGAGATACGTGTATTTTATTGC  
ATGTACCTGTGAATAAGCATCGGCTAACTCCGTG

>703 len=135 tot-seq=62

TGGGGAATATTGGACAATGGGCGCAAGCCTGATCCAGCCATGCCGCGTGAGTGATGACGG  
CCTTAGGGTTGTAAAGCTCTTTTCGACGGGGACGATAATGACGGTACCCGTAGAAGAAGCC  
CCGGCTAACTTCGTG

>704 len=112 tot-seq=61

GCGTGGATTACATCTCCACCAGCCGCGCGCACCAACACAAGTGCGCGCTGCTCAGCCGCG  
AGATCCCGGCCATCACCTACCGCGGTGGTGGCACCTATACCAAGGGCGCCTT

>705 len=222 tot-seq=61

ACGACCTGCTCTGGAATCGCAGAGGGAGCATCTAATGGAAGACCCTGGAGGGCTCCCTGT  
AAGGTGGGCACTGAGGCTTTTGGTGCAGGGCACGGAGGGCGGGGCAGAGTGGAGCACAGG  
CAGAGGGTATAGGTGAGCAGAGGCCGGAAGCCAGACCCTCCTGGATGCCCCTGGACATGC  
CCAGACCTGGAGGTGTTGAGGGGGGCAAGAGAGGTGCCCCAG

>706 len=156 tot-seq=61

TGAGGAATATTGGTCAATGGACGAAAGTCTGAACCAGCCAAGTAGCGTGCAGGATGACGG  
CCCTCCGGGTTGTAAACTGCTTTAGTTTCGGGAATAACGACGGGGACGTGTCCCTGAAAAG  
AATGTACCGAAAAGAATAAGGACCGGCTAATTCCGTG

>707 len=127 tot-seq=61

CAAGGGCTAGCAGAGGGACACTGCCAGGAAGTGAGAACTTGGGGCAACAGGTGGCCCTGA  
GTATGGGTAGAAATATCTGACCCACCCAGGGCTGTGACCGAGGTCGGACGGAAGTGCAG  
GGAAAGA

>708 len=161 tot-seq=61

TGGGGAATATTGCACAATGGGCGCAAGCCTGATGCAGCAACGCCGCGTGAGTGAAGAAGG  
TTTTCGGATCGTAAAGCTCTGTTGTAAGAGAAGAACGAGTGTGAGAGTGGAAAGTTCACA  
CTGTGACGGTATCTTACCAGAAAGGGACGGCTAACTACGTG

>709 len=160 tot-seq=61

TGGGGAATATTGCACAATGGGGGAAACCCTGATGCAGCCATGCCGCGTGTGTGAAGAAGG  
CCTTCGGGTTGTAAAGCACTTTCAGCGAGGAGGAAAGGTTGATGCCTAATACGCATCAGC  
TGTGACGTTACTCGCAGAAGAAGCACCGGCTAACTCCGTG

>710 len=135 tot-seq=61

TGGGGAATATTGGACAATGGGCGCAAGCCTGATCCAGCCATGCCGCGTGAGTGATGAAGG  
CCCTAGGGTTGTAAAGCTCTTTAACGGGGAAGATAATGACGGTACCCGTAGAATAAGCC  
CCGGCTAACTTCGTG

>711 len=136 tot-seq=61

GGAAGAAAATTGGCCAATCCTAATTCAGGGAGCCAGTGACAAGAAATAGCAAGCTGGGAA  
ACTTAGTTTCTACGGCATTGAAATGAGAAAAGTGTAATCTCTTAGCGAGGAACAATTGG  
AGGGCAAGTCATGGTG

>712 len=160 tot-seq=60

TGGGGAATATTCCACAATGGGCGCAAGCCTGATGGAGCGACGCCGCGTGAGTGAAGAAGG  
GTTTCGGCTCGTAAAGCTCTGTTGTTGAAGAAGAACGTGCGTGAGAGCAACTGTTACGC  
AGTGACGGTATTCAACCAGAAAGTCACGGCTAACTACGTG

>713 len=134 tot-seq=60

GCGCGCAAATTACCCAATCCTGACACGGGGAGGTAGTGACAATAAATAACAATACCGGGC  
TCTACGAGTCTGGTAATTGGAATGAGTACAATCTAAATCCCTAACGAGGATCCATTGGA  
GGGCAAGTCTGGTG

>714 len=135 tot-seq=60

GCGCGCAAATTACCCAATCCCGACACGGGGAGGTAGTGACAATAAATACTGATACAGGGC  
TCTTTTGGGTCTTGTAATTGGAATGAGTACAATTTAAATCCCTAACGAGGAACAATTGG  
AGGGCAAGTCTGGTG

>715 len=120 tot-seq=60

CCACTTCTGACAGGGAGGTAGAGAGGAAGTTCCAAGTTCCAGCAGGCAAAGGTGGCCC  
TGGGCTCACAGTCAAGAGCTGCCCTACTCAGGTCTACCTGCACGATGTCCAACACCATG

>716 len=172 tot-seq=60

TAGGGAATCTTCCACAATGGACGCAAGTCTGATGGAGCAACGCCGCGTGAGTGAAGAAGG  
GTTTCGGCTCGTAAAGCTCTGTTGTTGGTGAAGAAGGACAGGGGTAGTAACTGGCCTTTA  
TTTGACGGTAATCAACCAGAAAGTCACGGCTAACTACGTGGGGGGGCGCGG

>717 len=138 tot-seq=60

TGGGGAATATTGCACAATGGGGGAAACCCTGATGCAGCAACGCCGCGTGAACGATGAAGG  
CCAAAAGGTCGTAAAGTTCTGTCTTGGGGAAAGAAACAATGACGGTACCCTTGGAGGAA  
GCCCCGGCTAAATACGTG

>718 len=160 tot-seq=59

TAGGGAATCTTCCACAATGGGCGCAAGCCTGATGGAGCAACCCGCGTGAGTGAAGAAGG  
GTTTCGGCTCGTAAACCCTGTTGTTAGAGAAGAAAGTGCGTGAGAGTAACTGTTACGT  
TTCGACGGTATCTAACCAGAAAGCCACGGCTAACTACGTG

>719 len=160 tot-seq=59

TAGGGAATCTTCCACAATGGGCGAAAGCCTGATGGAGCAACGCCGCGTGTGTGATGAAGG  
CTTTCGGGTCGTAAAGCACTGTTGTATGGGAAGAACAGCTAGAATAGGAAATGATTTTAG  
TTTGACGGTACCATAACCAGAAAGGGACGGCTAAATACGTG

>720 len=135 tot-seq=59

TAGGGAATCTTCCACAATGGGCGCAAGCCTGATGCAGCAACGCCGCGTGAACGATGAAGG  
TCTTCGGATCGTAAAGTTCTGTTGCAGGGGAAGATAATGACGGTACCCTGTGAGGAAGCC

CCGGCTAACTACGTG

>721 len=135 tot-seq=59

TGGGGAATATTGGACAATGGGCGAAAGCCTGATCCAGCGACGCCGCGTGAGCGATGAAGT  
ATTCGGTATGTAAAGCTCTATCAGCAGGGAAGAAAACGACGGTACCTGACTAAGAAGCC  
CCGGCTAACTACGTG

>722 len=160 tot-seq=59

TGGGGAATTTTGGACAATGGGCGCAAGCCTGATCCAGCAATGCCGCGTGCAGGATGAAGG  
CCTTCGGGTTGTAAACTGCTTTTGTACGGAACGAAACGGCGAGCTCTAATACAGTTTGCT  
AATGACGGTACCGTAAGAATAAGCACCGGCTAACTACGTG

>723 len=180 tot-seq=59

GCGCGCAAATTACCCACTCCCGACCCGGGGAGGTAGTGACGAAAATAATACAGGACTCT  
TTCGAGGCCCTGTAATTGGAATGAGTCCACTTTAAATCCTTTAACGAGGATCCATTGGAG  
GGCAAGTCTGGTGCCAGCAGCCGCGGTAAACATAGATCGGAAGACGTCGTGTAGGGAAAG

>724 len=135 tot-seq=59

TGGGGAATATTGCACAATGGGGGGAACCCTGATGCAGCGACGCCGCGTGAGCGAAGAAGG  
GATTCGTTTCGTAAAGCTCTGTCTATGGGAAGATAATGACGGTACCATAGAAGAAAGCC  
CCGGCTAACTACGTG

>725 len=154 tot-seq=58

ATTTAATTATTTAACTCAGCTCTGAGTCAGAGATGGCCCAAGCATCAGAGCCCAAGCCAA  
TGCTGTCAGGGGTGAAATTACAAAATGATCCCCTTAGGCCCTGACCACATCATCCCTGAG  
TTATTAAGACCCAAAGCAGAAAATCAGAAATTCT

>726 len=157 tot-seq=58

TGAGGAATATTGGTCAATGGAGGAAACTCTGAACCAGCCACGCCGCGTGAGGGAAGAATG  
CCTTACGGGTTGTAAACTGCTTTTGTAGGAATAAAAATTCTTACGTGATAAGAATTAT  
GAATGTACTATACGAATAAGTGTCGGCAAACCTCCGTG

>727 len=104 tot-seq=58

GAGCGGATGGAGTCGCTGAGGCCCATCCATTGCTGGTAGTCAGGGTACTCCCCACGCCGC  
AGGAAGTACTGGTGGCCCTGGTAGTTGGGGCGCTCATAGATCAT

>728 len=210 tot-seq=58

TCAAAAAAAAAAAAAAAAAACAAATGAAAAAGAAACCCACTTCAATCCATCATGTGGCTGGG  
AGCTCACATAGCAGCCTAGTCTCAGGCAGCATGACTTCCATGGCAGCAGGAATGAGTGAC  
CTGTCTTTAGCTCCAGTCTCCAACCTCAGGAATACCCATCTCAGACATTCAGTTTCATATG  
TCCTGAGACAGCCTTTGCCCTGTATATTTT

>729 len=141 tot-seq=58

TGGGGAATATTGCACAATGGGCGGAAGCCTGATGCAGCGACGCCGCGTGGGGGATGACGG  
CCTTCGGGTTGTAAACTCCTTCGACAGGGACGAAGCTTTTTGTGACGGTACCTGTATAA  
GAAGCACCGGCTAACTACGTG

>730 len=138 tot-seq=57

TAGGGAATCTTGACAATGGGCGAAAGCCTGATGCAGCAACGCCGCGTGAAGGATGAAGG  
CCTTCGGGTCGTAAACTTCTGTTCTTGGGGAAGAAACAAATGACGGTACCCAAGGAGCAA  
GCCCCGGCTAACTACGTG

>731 len=160 tot-seq=57

TAGGGAATCTTCCACAATGGGCGAAAGCCTGATGGAGCAACGCCGCGTGGGTGAAGAAGG  
TCTTCGGGTTGTAAAGTACTTTCAGCGGGGAGGAAGGGAGTAAAGTTAATACCTTTGCTC  
ATTGACGTTACCCGCAGAAGAAGCACCGGCTAACTCCGTG

>732 len=137 tot-seq=57

TCGGGAATATTGCGCAATGGAGGAAACTCTGACGCAGTGACGCCGCGTATGGGAAGAAGG  
TTTTCGGATTGTAAACCATTGTCGTTAGGGAAGAAGAAGTGACAGTACCTAAGGAGGAAG  
CTCCGGCTAACTATGTG

>733 len=231 tot-seq=57

GGCGCAGCTGAGCGTTGGCAACGTCGCTGCCAATTAAGGGCTCCCTGCTGTGGGGGCTG  
ATCCAGGGTGGTTGTCGAGGGGGCGGTGGAGAGAATGGAATCATTAAAATGGGAGAACA  
AAGGAGGTAGGACAAGTTCAAATGAGATTAAGGCACAAAGGGAAAGGCTGCCTTTCTGGG  
GCATTTATGCCTAGGGACAGCTGGGTGCCTCTGGCAAATTTACCTGTAGC

>734 len=156 tot-seq=57

TGAGGAATATTGGTCAATGGGCGGAGCCTGAACCAGCCAAGTCGCGTGAGGGAGGACGG  
CCCTACGGGTTGTAAACCTCTTTTGCCGGGGAGCAACGGGCGCCACGTGTGGCGCCACTG  
AGAGTACCCGGAGAAAAAGCATCGGCTAACTCCGTG

>735 len=137 tot-seq=57

TGGGGAATATTGGGCAATGGGCGCAAGCCTGACCCAGCAACGCCGCGTGAAGGAAGAAGG  
CCCTCGGGTTGTAAACTTCTTTTATCAGGGACGAAGAAATGACGGTACCTGATGAATAAG  
CCACGGCTAACTACGTG

>736 len=140 tot-seq=57

TGGGGAATATTGCACAATGGGCGAAAGCCTGATGCAGCGACGCCGCGTGAGGGATGACGG  
CCTTCGGGTTGTAAACCTCTTTCAGCAGGGAAGAAGCTTTTGTGACGGTACCTGCAGAAG  
AAGCACCGGCTAACTACGTG

>737 len=155 tot-seq=57

TGAGGAATATTGGTCAATGGGCGAGAGCCTGAACCAGCCAAGTAGCGTGCAGGATGACGG  
CCCTATGGGTTGTAAACTGCTTTTATAAGGGAATAAAGTGGGTACCGTGTGACTTTTTGC  
ATGTACCTTATGAATAAGGACCGGCTAATCCGTG

>738 len=185 tot-seq=56

TGGGGGATATTGCACAATGGGGGGAACCCTGATGCAGCGATGCCGCGTGGAGGAAGAAGG  
TTTTCGGATTGTAAACTCCTGTCCTGAAGGACGATAATGACGGTACTTCAGGAGGAAGCT  
CCGGCTAACTATGTGGAAGGACGATAATGACGGTACTTCAGGAGGAAGCTCCGGCTAACT  
ATGTG

>739 len=216 tot-seq=56

TGGGGAATATTGCACAATGGGCGAAAGCCTGACGCAGCAACGCCGCGTGAGTGAAGACGG  
CCTTCGGGTTGTAAAACCTCTGTGATTCGGGACGAAAGATAAGTAGACGAATAATCTGCAT  
AAGTGACGGTACCGAAAAAGCAAGCCACGGCTAACTACGTGGGGGGAGCTGCGGTAATTC  
CAAGATCGGAAGAGCGTCGTGTAGGGAAAGAGGTGG

>740 len=160 tot-seq=56

TAGGGAATTTTCGGCAATGGGCGCAAGCCTGACCGAGCAACGCCGCGTGAGTGAAGAAGG  
CCTTCGGGTTGTAAAGCTCTGTTGTAAGGGAAGAACAACCTTAAAAGAGGGAATGCTTTTAA  
GCTGACGGTACCTTACCAGAAAGCCACGGCTAACTACGTG

>741 len=156 tot-seq=56

TGAGGAATATTGGTCAATGGGCGGAAGCCTGAACCAGCCATGCCGCGTGCGGGAAGGAGG  
CCCTATGGGCTGTGAACCGCTTTTGCCTGGGGGCAATAAGGGCGTCGCGCACGTCCGATG



AGAGTACCAGGCGAATAAGCATCGGCTAACTCCGTG

>742 len=180 tot-seq=56

AAGGCACAGTCAGCAAGAGGCCAGCATCCAGGAGGAGGCCTGGACCACACGCACCCCAA  
ATGTTTCGATGATCTGCACCCTTCCAGGAGGGCCTGAAAGCCAGTAGGAAGAGGTCTCCGC  
TGAGGCCGGTCAGGAGCAGCACACTGGCATA CATAGACAGAATGGTGATGGAGGACAACA

>743 len=161 tot-seq=56

TGAGGAATATTGGTCAATGGACGGAAGTCTGACCGAGCAACGCCGCGTGAGTGAAGAAGG  
TTTTCGGATCGTAAAGCTCTGTTGTAAGAGAAGAACGAGTGTGAGAGTGGAAAGTTCACA  
CTGTGACGGTATCTTACCAGAAAGGGACGGCTAACTACGTG

>744 len=155 tot-seq=56

TGGGGAATATTGCGCAATGGGGGAAACCCTGACGCAGCCAAGTAGCGTGCAGGATGACGG  
CCCTATGGGTTGTAAACTGCTTTTATATGGGAATAAAGTGAGGGACGTGTCCCTTATTGC  
ATGTACCATACGAATAAGGACCGGCTAATTCCGTG

>745 len=180 tot-seq=55

TGGGGAATATTGCACAATGGGGGAAACCCTGATGCAGCAACGCCGCGTGAACGATGAAGG  
CCTTTGGGTCGTAAAGTTCTGTTCTAGGTGATGAAAGCTGACAGTAACCTAGGAGAAAGC  
CCCGGCTAACTCCGTGCCAGCAGCCGCGGTATCCTAAGATCGGAAGAGCGTCGTGTTGGG

>746 len=135 tot-seq=55

TAAGGAATATTCCACAATGGGGGAAACCCTGATGGAGCAATACCGCGTGCAGGAAGACGC  
TTTTCGGAGTGTAACCTGCTTTTATCTACCAAGATTATGACGGTAGTAGATGAATAAGGA  
CCGGCTAACTACGTG

>747 len=138 tot-seq=55

TGGGGAATATTGGGCAATGGGCGAAAGCCTGACCCAGCAACGCCGCGTGAGGGAAGAAGG  
CCTTCGGGTTGTAAACCTCTGTCCTTAGTGACGAAGGAAGTGACGGTAGCTAAGGAGGAA  
GCCCCGGCTAACTACGTG

>748 len=222 tot-seq=55

TCCTGCTGGGACACAGCCCAGGCGGAATCCCCCTTTCTTTCTCCTGGACCAATCAGATGT  
GAGTCAGGGACCCTCTCATTAACAAATTTCTCCCTTCTCCTCCCCTGTTATGAGGCCA  
GGAGCGGGCGTTGACCTACATGGAAGGGGAGGAGAGGTGGAACCAGTTGGAGCAAATACC

CAACCTGCCTCTTGCCTGGTAAGGTCACCCAGAAGCCTTGAG

>749 len=160 tot-seq=55

TGGGGAATATTGCACAATGGGCGCAAGCCTGATGCAGCAACGCCGCGTGAGTGAAGAAGG

GTTTCGGCTCGTAAAGCTCTGTTGTTGGTGAAGAAGGACAGGGGTAGTAACTGACCTTTG

TTTGACGGTAATCAATTAGAAAAGTCACGGCTAACTACGTG

>750 len=156 tot-seq=54

CTGGAATTACCACAGGACCTGACTGTTGGTTGTAGGACCCAGATGGCAGAAGCCTGAAAA

TGTTTCTGGCAAATACCTCCACAAGCCGGAGTGTGTGTGTGTGTGTGTGTGCTAGCATGC

ATGCTCCTCCTTTTTATTGGCACTTTAGTTAAATGC

>751 len=224 tot-seq=54

AAGGTCCTCCAGAAAATAATAGCCTAGGCTACCCATCTGCCAAACTCATGAGCTGCCCCA

CACCTGTGCTTTTGGCTCTATGCAAACATTTAATACGATTCCAAGTTGGGTCAGGGGCAC

ATGCAAAAATTCAGGGCTCCATGGGCCTGCTGAAAGCAATTCAGGACGATCCCACAGCCT

GTAGTGCAGGCTTTACAGGTCAGACAGGAAGGGAGGAAGAGCT

>752 len=141 tot-seq=54

TGGGGAATATTGCACAATGGGCGGAAGCCTGATGCAGCGACGCCGCGTGGGGGATGACGG

CCTTCGGGTTGTAAACCTCTTTCGCTAGGGACGAAGCTTTTGTGACGGTACCTAGATAAG

AAGCACCGGCTAACTACGTGG

>753 len=155 tot-seq=54

TGAGGAATATTGGTCAATGGGCGAAGGCCTGAACCAGCCAAGTAGCGTGCAGGATGACGG

CCCTATGGGTTGTAACTGCTTTTATGCGGGGATAAATGACGCCACGTGTGGTGTGTTTGC

AGGTACCGCATGAATAAGGACCGGCTAATTCCGTG

>754 len=160 tot-seq=54

TAGGGAATCTCCACAATGGACGCAAGTCTGATGGAGCAACGCCGCGTGAGTGAAGAAGG

TTTTCGGATCGTAAAGCTCTGTTGTTAGAGAAGAAAGTGCGTGAGAGTAACTGTTACGT

TTCGACGGTATCTAACCAGAAAGCCACGGCTAACTACGTG

>755 len=160 tot-seq=54

TAGGGAATCTCCACAATGGACGCAAGTCTGATGGAGCAACGCCGCGTGAGCGAAGAAGG

TCTTCGGATCGTAAACTCTGTTGTTAGAGAAGAACACGGGTGAGAGTAACTGTTACCT

GTTGACGGTATCTAACCAGCAAGTCACGGCTAACTACGTG

>756 len=155 tot-seq=53

TGAGGAATATTGGTCAATGGACGAGAGTCTGAACCAGCCAAGTCGCGTGAAGGATGACTG  
CCCTATGGGTTGTAAACTTCTTTTATGTGGGAATAAAAAAGAGTATGTATACTCTATTGC  
ATGTACCATAATGAATAAGCATCGGCTAACTCCGT

>757 len=135 tot-seq=53

TGGGGAATATTGCACAATGGGGGAAACCCTGATGCAGCGATGCCGCGTGGAGGAAGAAGG  
TTTTCGGATTGTAAACTCCTTTTATCAGGGACGATAATGACGGTACCTGAAGAAAAAGCT  
CCGGCTAACTACGTG

>758 len=155 tot-seq=53

TGAGGAATATTGGTCAATGGGCGGAAGCCTGAACCAGCCAAGTAGCGTGAAGGATGACTG  
CCCTATGGGTTGTAAACTTCTTTTATAAAGGAATAAGATCACCTACGTGTAGGTGCGTGT  
ATGTACTTTATGAATAAGCATCGGCTAACTCCGTG

>759 len=117 tot-seq=53

TAGGGAATCTTCCACAATGGACGCAAGCCTGATGGAGCAACGCCGCGTGAGTGAAGAAGG  
TTTTCGGATCGTAAAGCTCTGTTGTTGGTGAAGAAGGATAGAGGTAGTAACTGGCCT

>760 len=138 tot-seq=53

TGGGGAATATTGGGCAATGGGCGCAAGCCTGACCCAGCAACGCCGCGTGAGGGAAGAAGG  
TTTTCGGATTGTAAACCTCTGTGCGAGAAGACGAAGGAAGTGACGGTATTCTGTGAGGAA  
GCCCCGGCTAACTACGTG

>761 len=155 tot-seq=53

TGAGGAATATTGGTCAATGGGAGAGATCCTGAACCAGCCAAGTCGCGTGAAGGAAGACGG  
TCCTATGGATTGTAAACCTCTTTTGCCGGGGAGCAAGCTGTGCCACGTGTGGCGCAGCTG  
AGAGTACCCGGAGAAAAAGCATCGGCTAACTCCGT

>762 len=160 tot-seq=53

TGGGGAATATTGGACAATGGGCGCAAGCCTGATCCAGCCATGCCGCGTGTGTGAAGAAGG  
CCTTAGGGTTGTAAAGCACTTTCAGTGGGGAGGAAGGGTGTGTGTTAATAGCACGGCAT  
TTTGACGTTACCCACAGAAGAAGCACCGGCTAACTCCGTG

>763 len=155 tot-seq=53

TGAGGAATATTGGTCAATGGCCGGAAGGCTGAACCAGCCAAGCCGCGTGAGGGAGGAAGG  
CGCAGAGCGTCGCAGACCTCTTTTGCCGGGGGACAAAAGGCCGGACTCGTCCGGTCCTGA  
GGGTACCCGGAGAAAAGCATCGGCTAACTCCGTG

>764 len=138 tot-seq=53

ATGGGTGTGAAATGTGGGCACCTTAGAGTGCTGGGTGCTTGGGGTGGGGCGAGCGCGAAC  
AGCAGCTCGTGTCTGATCTCCAGTAGTTTGCTTTGGAACTGGGACCGTGTGTTGACTC  
TGAACGCACCTTACGCGC

>765 len=160 tot-seq=53

TAGGGAATCTCCGCAATGGACGAAAGTCTGACGGAGCAACGCCGCGTGAGTGAAGAAGG  
TTTTCGGATCGTAAAACCTCTGTTGTTGGAGAAGAACAAGTAGGAGAGTAACTGCTCTTAC  
CTTGACGGTACCCAACCAGAAAAGCCACGGCTAACTACGTG

>766 len=161 tot-seq=53

TAGGGAATCTCCGCAATGGACGGAAGTCTGACCGAGCAACGCCGCGTGAGTGAAGAAGG  
TTTTCGGATTGTAAAGCTCTGTTATACGGGACGAAAAAGACGGATGCCAACAGTATCCGT  
CCGTGACGGTACCGTAAGAGAAAGCCACGGCTAACTACGTG

>767 len=135 tot-seq=52

TGGGGAATATTGCACAATGGAGGAACTCTGATGCAGCGACGCCGCGTGAAGGATGAAGT  
ATTTCCGGTATGTAACTTCTATCAGCAGGGAAGAAAATGACGGTACCTGACTAAGAAGCC  
CCGGCTAACTACGTG

>768 len=154 tot-seq=52

TAAGGAATATTGGTCAATGGGCGCAAGCCTGAACCAGCCATGCCGCGTGGAGGATGAAGG  
TCCTCTGGATTGTAACTTCTTTATTTGGGACGAAAAACGGGGATTCTTCTCACTTGA  
CGGTACCAGATGAATAAGCACCGGCTAACTCCGT

>769 len=137 tot-seq=52

TGGGGAATATTGGGCAATGGGCGAAAGCCTGACCCAGCGACGCCGCGTGAGGGAAGAAGG  
TCTTCGGATTGTAAACCTTAGTTAGCAGGGAAGAAGAAAGTGACGGTACCTGCAGAGAAA  
GCCACGGCTAACTACGT

>770 len=155 tot-seq=52

TGAGGAATATTGGTCAATGGGCGAGAGCCTGAACCAGCCAAGTAGCGTGCAGGATGACGG

CCCTATGGGTTGTAACTGCTTTTATGCGGGGATAAAGTGCGTGACGTGTCACGCATTGC  
AGGTACCGCATGAATAAGGACCGGCTAATTCCGTG

>771 len=136 tot-seq=52

TGGGGAATTTTGCGCAATGGGGGAAACCCTGACGCAGCAACGCCGCGTGCGGGACGACGG  
CCTTCGGGTTGTAAACCGCTTTCAGCAGGGAAGAAATTCGACGGTACCTGCAGAAGAAGC  
TCCGGCTAACTACGTG

>772 len=155 tot-seq=52

AATCTTCCACAATGGACGCAAGTCTGATGGAGCAACGCCGCGTGAGTGAAGAAGGGTTTC  
GGCTCGTAAAGCTCTGTTGTTGGTGAAGAAGGACAGGGGTAGTAACTGACCTTTGTTTGA  
CGGTAATCAATTAGAAAGTCACGGCTAACTACGTG

>773 len=145 tot-seq=52

TGGGGAATATTGCGCAATGGGGGAAACCCTGACGCAGCGACGCCGCGTGCGGGATGAAGG  
CCTTCGGGTTGTAAACCTCTTTTGTAGGGAGCAAGGCACTTTGTGTTGAGTGTACCTTT  
CGAATAAGCACCGGCTAACTACGTG

>774 len=230 tot-seq=51

GAGGCCAGTGGTAGTGTCTGCATGGACCGTTGCTGGCTGTGGTCCTCTGCAGGGACCACT  
GCTGTGTCTGTTCCAGCCTCTCCTTTCCTAAACCAGGCCGGCCCTGTCAGCCTGGCTCC  
AAACTTCACTCCCTGGCCTTTGGAGGGAAGACCCTCTGGTTCGGGCCTTCTTCTCTCTC  
AGGGCTTTGGAAGCCCTCTTCTTCCAAAGGGGCTTGGCTTTCTGTCAC

>775 len=155 tot-seq=51

TGAGGAATATTGGTCAATGGGCGAGAGCCTGAACCAGCCAAGTCGCGTGAAGGACGACGG  
TTCTATGGATTGTAACTTCTTTGTAGAGGAATAATGGCAGCTACGTGTAGCTGAGATG  
CATGTA CTACGAATAAGTATCGGCTAACTCCGT

>776 len=155 tot-seq=51

TGGGGAATCTTCGCAATGGACGAGAGTCTGAACCAGCCAAGTAGCGTGCAGGATGACGG  
CCCTATGGGTTGTAACTGCTTTTGTGGGAATAATCGACATTACGTGTAATGTTTTGC  
ATGTACCATTGAATAAGGACCGGCTAATTCCGTG

>777 len=160 tot-seq=51

CCAAAATCTCACTATTGCAGCCAAAGGAGATGTGTATTTCCCCTTCTCCACTCCTTGCAT

CTGGTCCATGCTCAAAGTAAGCCAAACCAGTGCTCTTGTGCAGAACCCCTAAATCGAAAGG  
GGGTGACACATAAATCCAGGCACAATGGAGACTACCAAAG

>778 len=160 tot-seq=51

TGGGGAATTTTGGACAATGGGGGCAACCCTGATCCAGCCATTCCGCGTGAGTGAAGAAGG  
CCTTCGGGTTGTAAAGCTCTTTCGGACGGAACGAAACGGTTAGCGTGAATAACGCTGACT  
AATGACGGTACCGTAAGAAGAAGCACCGGCTAACTACGTG

>779 len=126 tot-seq=50

TAGGGAATCTTCCACAATGGACGCAAGTCTGATGGAGCAACGCCGCGTGAGTGAAGAAGG  
ATAGAGGTAGTAACTGGCCTTTATTTGACGGTAATCAACCAGAAAGTCACGGCTAACTAC  
GTGGTG

>780 len=122 tot-seq=50

GAGGACCAGTGTGTAATAGGACAGCAGCAGAATCAAAGGGTTTATCATCTCTGCCAGCCA  
GAGCCTGGATGGCAGTGGAGTTTCCAGGACACTGCGGTTGGTCCTGATGCATGCGATCAT  
CT

>781 len=140 tot-seq=50

TGGGGAATATTGGACAATGGGCGGAAGCCTGATCCAGCAACGCCGCGTGAGGGATGACGG  
CCTTCGGGTTGTAAACCTCTTTCAGCACCGACGAAGCGCAAGTACGGTAGGTGCAGAAG  
AAGGACCGGCCAACTACGTG

>782 len=149 tot-seq=50

CCCCCCCCCTCAGGGACTGCTCGTGTCCAGATCTTGGCCAGCATGGAAAACCTCCAGATAG  
TGGGGGCAGGGGTCCAGGTCATCTTTATTACGCCCCAGGTCAAGGGTTCTTTGTACAAAA  
ATAGGTCTCCGTTTGCCAGCAGTGTCCCT

>783 len=144 tot-seq=50

TGGGGAATATTGCACAATGGGCGCAAGCCTGATGCAGCGACGCCGCGTGGGGGATGACGG  
CCTTCGGGTTGTAAACTCCTTTCGCCCACGACGAAGCCCTTCGGGGTGACGGTAGTGGGA  
TAAGAAGCACCGGCTAACTACGTG

>784 len=160 tot-seq=50

TGGGGAATATTGCACAATGGGCGAAAGCCTGATGCAGCGACGCCGCGTGAGTGAAGACGG  
TCTTCGGATTGTAAAGCTCTGTTATACGGGACGAACGGCAAGGTGGTAAATAGCCATCAT

GAGTGACGGTACC GTAAGAGAAAGCCACGGCTAACTACGT

>785 len=135 tot-seq=50

TGGGGAATCTTGACAATGGGCGAAAGCCTGATGCAGCGACGCCGCGTGCGGGATGAAGG  
CCTTCGGGTTGTAAACCGCTTTCAGCAGGGAAGACATCGACGGTACCTGCAGAAGAAGCC  
CCGGCTAACTACGTG

>786 len=135 tot-seq=49

TGGGGAATATTGGGCAATGGGCGCAAGCCTGACCCAGCAACGCCGCGTGAAGGAAGAAGG  
TCTTCGGGTCGTAAACTTCTATCCTTGGTGAAGATAATGACGGTAGCCAAGAAGGAAGCC  
CCGGCTAACTACGTG

>787 len=160 tot-seq=49

TAGGGAATTTTCGGCAATGGGGGAAACCCTGACCGAGCAACGCCGCGTGAGCGAAGAAGG  
CCTTCGGGTCGTAAAGCTCTGTTGTAAAGGAAGAACGGCGCATACAGGAAATGGTATGCG  
AGTGACGGTACTTTACCAGAAAGCCACGGCTAACTACGTG

>788 len=154 tot-seq=49

TGGGGAATATTGCGCAATGGGGGAAACCCTGACGCAGCGACGCCGCGTGCGGGATGAAGG  
CCTTCGGGTTGTAAACTGCTTTTATATGGGAATAAAGTGAGGGACGTGTCCCTTATTGCA  
TGTACCATACGAATAAGGACCGGCTAATCCGTG

>789 len=135 tot-seq=48

TGGGGAATATTGCACAATGGGCGAAAGCCTGATGCAGCGACGCCGCGTGAGCGAAGAAGT  
ATTTCCGGTATGTAAAGCTCTATCAGCAGGGAAGATAATGACGGTACCTGACTAAGAAGCA  
CCGGCTAAATACGTG

>790 len=155 tot-seq=48

TGAGGAATATTGGTCAATGGCCGTAAGGCTGAACCAGCCAAGTCGCGTGAGGGAAGACGG  
CCCTACGGGTTGTAAACCTCTTTTGTAGGGAGCAAGGGGCGGGTCTGTGACCTGCTGTGA  
GAGTACCTGAAGAAAAAGCATCGGCTAACTCCGTG

>791 len=135 tot-seq=48

TGGGGAATATTGGACAATGGGGGCAACCCTGATCCAGCCATGCCGCGTGAGTGATGAAGG  
CCTTCGGGTTGTAAAGCTCTTTTGGCGGGGACGATGATGACGGTACCCGCAGAATAAGCC  
CCGGCTAACTTCGTG

>792 len=189 tot-seq=48

TGGGGAATATTGCACAATGGGGGAAACCCTGATGCAGCGACGCCGCGTGGAGGAAGAAGG  
TCTTCGGATTGTAAACTCCTGTTGTTGGGGAAGATAATGACGGTACCCAACAAGGAAGTG  
ACGGCTAACTACGTGCCAGCAGCCGCGGTAAAACGTAGGTCACAAGCGTTGTCCGGAATT  
ACTGGGTGT

>793 len=160 tot-seq=48

TGGGGAATATTGCACAATGGGGGAAACCCTGATGCAGCCATGCCGCGTGTGTGAAGAAGG  
CCTTCGGGTTGTAAAGCACTTTCAGTAGGGAGGAAAGGGTGAGTCTTAATACGGCTCATC  
TGTGACGTTACCTACAGAAGAAGGACCGGCTAACTCCGTG

>794 len=206 tot-seq=48

TGGGGAATATTGCGCAATGGACGAAAGTCTGATGGAGCAACGCCGCGTGAGTGAAGAAGG  
TTTTCGGATCGTAAAGCTCTGTTGTTGGTGAAGAAGGATAGAGGTAGTAACTGGCCTTTA  
TTTGACGGTAATCAACCAGAAAGTCACGGCTAACTACGTGCCAGCAGCCGCGTAATATTC  
AGATCGGAAGAGCGTCGTGTTGGGGA

>795 len=142 tot-seq=47

TGGGGAATATTGCGCAATGGGGGAAACCCTGACGCAGCGACGCCGCGTGCGGGATGAAGG  
CCTTCGGGTTGTAAACCGCTTTTGATTGGGAGCAAGCTTTCGGGTGAGTGTACCTTTCGA  
ATAAGCGCCGGCTAACTACGTG

>796 len=135 tot-seq=47

TGGGGGATATTGCACAATGGGGGAAACCCTGATGCAGCGACGCCGCGTGAGCGAAGAAGT  
ACCTCGGTATGTAAAGCTCTATCAGCAGGGAAGAAAATGACGGTACCTGACTAAGAAGCC  
CCGGCTAAATACGTG

>797 len=101 tot-seq=47

TGACTTACAGTTCTGGTCGGAGTCTTCTATCAGTATCCTCAACTTCTGAACGCATAGCTG  
AGAGGAGGAAAGCCACACTGGTCTGCACCCACCACCATGC

>798 len=152 tot-seq=47

TGGGGAATCTTGACAATGGGCGAAAGCCTGATGCAGCGACGCCGCGTGGAGGGTGTAGG  
CCTTCGGGTTGTGAACTCCTTTTTCTCGTGAAAAGGCATGCTTTTGGGTGTGTTGATGG  
TAGCGGGGGAAGAAGCGCCGGCTAACTACGTG



>799 len=138 tot-seq=47

TGGGGAATATTGGGCAATGGGGGAAACCCTGACCCAGCAACGCCGCGTGAGGGAAGAAGG  
CTTTCGAGTTGTAAACCTCTGTCCTATGGGAAGAAGAAAGTGACTGTACCATAGGAGGAA  
GCTCCGGCTAACTACGTG

>800 len=212 tot-seq=47

GGGTTGGTGTAGCCTCATCTGTTGCCATGACAAGTAACCACAATACCCAGGGGAGAGAGG  
GTTTGCCTGAACTTCCAAGCTGCACTCCACCATGGAGGGGAGTCCGGGCAGGAACTGGAG  
CAGGAACAGGAAGACAGGCCTAGGTGTACTCCACACAGCACATCTCTGACTGAAAGGACG  
GGTCTGAGTGTGTGCTAGCTCAGTCGGTCAGC

>801 len=223 tot-seq=47

TGGGGAATATTGCACAATGGGCGCAAGCCTGATGCAGCCATGCCGCGTGTATGAAGAAGG  
CCTTCGGGTTGTAAAGTACTTTTCAGCGGGGAGGAAGGCGATAAGGTTAATAACCTTGTCG  
ATTGACGTTACCCGCAGAAGAAGCACCGGCTAACTCCGTGCCAGCAGCCGCGGTAATAAC  
AAGATCGGAAGAGCGTCGTGTAGGGAAAGAGTGGGCCAATGTG

>802 len=136 tot-seq=46

TGGGGAATATTGCACAATGGGGGGAACCCTGATGCAGCGATGCCGCGTGGAGGAAGAAGG  
TTTTCGGATTGTAAACTCCTGTCGACAGGAAAAGAAAAGGACTGTACCTGTCAAGAAAGC  
TCCGGCTAACTACGTG

>803 len=155 tot-seq=46

TGAGGAATATTGGTCAATGGCCGTAAGGCTGAACCAGCCAAGTCGCGTGAAGGAAGAAGG  
ATCTATGGTTTGTAAACTTCTTTTATAGGGGAATAAAGGTATCCACGTGTGGATATTTGC  
ATGTACCCTATGAATAAGCATCGGCTAACTCCGTG

>804 len=160 tot-seq=46

TGGGGAATTTTGGACAATGGGCGCAAGCCTGATCCAGCCATGCCGCGTGCAGGATGAAGG  
CCTTCGGGTTGTAAACTGCTTTTGTACGGAACGAAAAGACTCCTTCTAATAAAGGGGGTC  
CATGACGGTACCGTAAGAATAAGCACCGGCTAACTACGTG

>805 len=155 tot-seq=46

TGAGGAATATTGGACAATGGGTGGAAGCCTGATCCAGCCATCCC GCGTGTAGGATGACGG  
CCTTATGGGTTGTAAACTACTTTTATCTGGGGATAAACCTACTTACGTGTAAGTAGCTGA

AGGTACCAGAAGAATAAGCACCGGCTAACTCCGTG

>806 len=109 tot-seq=46

TAGGGAATTTTCGGCAATGGGGGAAACCCTGACCGAGCAACGCCGCGTGAAGGAAGAAGG

AATTCGTTCTGTAACTTCTGTTATAAAGGAAGAACGGCGGATATAGGG

>807 len=156 tot-seq=46

TGAGGAATATTGGTCAATGGGCGGAAGCCTGAACCAGCCAAGTCGCGTGAGGGAATAAGG

CCCTACGGGTCGTAAACCTCTTTTGTCTGGGGAGCAAGGCCCGGGACGTGTCCCGGGAAGG

AGAGTACCCGAAGAAAAGCATCGGCTAACTCCGTG

>808 len=155 tot-seq=46

TGAGGAATATTGGTCAATGGGCGCAGGCCTGAACCAGCCAAGTCGCGTGAGGGAAGACTG

CCCTATGGGTTGTAAACCTCTTTTATAAGGGAAGAATAATGACTACGTGTAGTCAGATGC

CCGTACCTTATGAATAAGCATCGGCTAACTCCGTG

>809 len=170 tot-seq=46

GAGGCTGTGTTCTAGAAAGGTCCCTGTAGCTGCCGTGTGGCAGTGGACTGATGGGTGCAG

GACTGGGGAGAAACAGGCTAAGGAGGAGGCTGCCACATGGGTTTAGTGGAAGAGAGTAA

GGGCTTGCACCAGGACCCCCCAGCAGAGATGGAGAAGAAGGGACCTCATC

>810 len=137 tot-seq=46

TGGGGAATATTGGGCAATGGGGGAAACCCTGACCCAGCGACGCCGCGTGAAGGAAGAAGG

TTTTCGGATTGTAAACCTCTGTTCTTGGTGAAGAGGGGAAGACGGTAGCCAAGGAGAAAAG

CCCCGGCTAACTACGTG

>811 len=160 tot-seq=46

TGGGGAATATTGCGCAATGGGGGAAACCCTGACGCAGCGACGCCGCGTGCGGGATGAAGG

CCTTCGGGTTGTAAAGCTCTGTTGTTGGTGAAGAAGGATAGAGGTAGTAACTGGCCTTTA

TTTGACGGTAATCAACCAGAAAAGTCACGGCTAACTACGTG

>812 len=138 tot-seq=46

TGGGGGATATTGCGCAATGGGGGAAACCCTGACGCAGCAACGCCGCGTGAAGGATGAAGG

TCTTCGGATTGTAACTTCTTTTATTAAGGACGAAGAAAGTGACGGTACTTAATGAATAA

GCTCCGGCTAACTACGTG

>813 len=135 tot-seq=45

TCGGGAATTTTGCGCAATGGACGAAAGTCTGACGCAGCAACGCCGCGTGAGGGATGACGG  
CCTTCGGGTTGTAAACCTCTTTTATCAGGGAAGATAATGACGGTACCTGATGAATAAGTC  
ACGGCTAACTACGTG

>814 len=155 tot-seq=45

TGAGGAATATTGGTCAATGGGCGCAAGCCTGAACCAGCCATGCCGCGTGCAGGATGACGG  
TCCTATGGATTGTAAACTGCTTTTGTACAGGAAGAAACAGTTCTACGTGTAGAGCCTTGA  
CGGTACTGTAAGAATAAGGATCGGCTAACTCCGTG

>815 len=160 tot-seq=45

TGGGGAATTTTGGACAATGGGGGCAACCCTGATCCAGCCATGCCGCGTGCGGGAAGAAGG  
CCTTCGGGTTGTAAACCGCTTTTGTACAGGGACGAAAAGGGACGGGTTAAGAGCTAGTTCC  
GCTGACGGTACCTGAAGAATAAGCACCGGCTAACTACGTG

>816 len=155 tot-seq=45

TGAGGAATATTGGACAATGGTCGGAAGACTGATCCAGCCATGCCGCGTGCAGGATGAAGG  
TCCTATGGATTGTAAACTGCTTTTGTAAAGGAAGAATAAGGAGTACGTGTACTTTGATGA  
CGGTACCTTACGAATAAGCATCGGCTAACTCCGTG

>817 len=135 tot-seq=45

TGGGGAATATTGCACAATGGACGGAAGTTTGATGCAGCGACGCCGCGTGAGCGAAGAAGT  
ATTTCCGGTATGTAAAGCTCTATCAGAAGGGAAGAAAATGACGGTACCTTACTAAGAAGCT  
CCGGCTAAATACGTG

>818 len=138 tot-seq=45

TGGGGAATTTTACGCAATGGGGGAAACCCTGACGTAGCGACACCGCGTGAGCGAAGAAGC  
CCTTTGGGGTGTAAAGCTCTGTCAGCTGGAACGAAAACAATGACGGTACCAGCAGAGGAA  
GCATCGGCTAACTACGTG

>819 len=135 tot-seq=45

TGGGGAATATTGCACAATGGAGGAAACTCTGATGCAGCGACGCCGCGTGAGGGAAGAAGG  
TCTTCGGATTGTAAACCTCTGTCTTCGGTGACGAAAATGACGGTAGCCGAGGAGGAAGCC  
ACGGCTAACTACGTG

>820 len=135 tot-seq=45

TGGGGAATTTTGCACAATGGGGGAAACCCTGATGCAGCGACGCCGCGTGAGTGAAGACGG

TCTTCGGATTGTAAAGCTCTGTTTCGAGGGAAGAAAAGGACGGTACCTCGGGAGGAAGCC  
CCGGCTAACTACGTG

>821 len=135 tot-seq=44

TGGGGAATATTGCACAATGGGGGGAACCCTGATGCAGCAATGCCGCGTGGGTGAAGAAGT  
ACTCCGGTATGTAAAGCCCTATCAGCAGGGAAGAAAATGACGGTACCTGACTAAGAAGCC  
CCGGCTAACTACGTG

>822 len=155 tot-seq=44

TGAGGAATATTGGTCAATGGACGAAAGTCTGAACCAGCCAAGTAGCGTGCAGGATGACGG  
CCCTCTGGGTTGTAACCTGCTTTTAGTTGGGAATAAAAAGAGGGACGTGTCCTTATTGT  
ATGTACCATCAGAAAAAGGACCGGCTAATTCCGTG

>823 len=220 tot-seq=44

GACCTAAAAGTGGGATTTGTAAGTTGATTACATGGAAAAACTAGTGGATCTTAATTCAG  
AAACTCTAATCCAGGATTAATGTGAACCTGATTGGACCATCTAAATCTGAAGACAGTCTT  
CTGATCTCTGCTTCTCCTTTCTGTAGCTGGGCTGACTCGTGAGCAGCACCAATCAATCTA  
GTGTCTCTGAGTTCATCTTCTGGAAGTCTCCAGGCAGCC

>824 len=161 tot-seq=44

TAGGGAATCTCCACAATGGGCGCAAGCCTGATGGAGCAACACCGCGTGAGTGAAGAAGG  
GTTTCGGCTCGTAAAAGTCTGTTGTTAGAGAAGAACGTTGGTAGGAGTGAAAAATCTACC  
AAGTGACGGTAACTAACCAGAAAGGGACGGCTAACTACGTG

>825 len=160 tot-seq=44

TGGGGAATATTGCGCAATGGACGAAAGTCTGACGCAGCGACGCCGCGTGAGGGATGAAGG  
TTTTCGGATCGTAAACCTCTGTCAGGAGGGAAGAAAGCGCATGGCGCCAATCAGCCATGC  
GTTGACGGTACCTCAAAGGAAGCGCCGGCTAACTCCGTG

>826 len=165 tot-seq=44

TGCGCAAAATATGGCATTGGATTTTATTCTATGGGAAATAAGAAGTCATTGGTAAGGTTC  
AGGCAGGGAAGTTACATGTTTCTAAGTAACTGCTGCTATGGTGAATGGCTGGTAGGTTGT  
CAAGATTAGAAATCTGGAGACCGGTTGAAATGGTCTTGAAGTTGC

>827 len=137 tot-seq=44

TGGGGGATATTGCACAATGGGGGGAACCCTGATGCAGCGACGCCGCGTGAGGGAAGACGG

TTTTCGGATTGTAAACCTCTGTCTTTGGGGACGAACAAATGACGGTACCCAAGGAGGAAG  
CCACGGCTAACTACGTG

>828 len=135 tot-seq=43

TGGGGAATATTGCACAATGGGGGAAACCCTGATGCAGCAACGCCGCGTGAAGGATGAAGG  
CCTTTGGGTCGTAAACTTCTGTTCTAAGGGAAGATAGTGACGGTACCTTAGGAGCAAGTC  
CCGGCTAACTACGTG

>829 len=160 tot-seq=43

TGGGGAATTTTGGACAATGGGGCGAAAGCCTGATCCAGCAATGCCGCGTGCAGGATGAAGG  
CCTTCGGGTTGTAAACTGCTTTTGTACGGAACGAAAAAGCTCCTTCTAATACAGGGGGCC  
CATGACGGTACCGTAAGAATAAGCACCGGCTAACTACGTG

>830 len=160 tot-seq=43

CTAAGAATCTTCCGCAATGGGGCGAAGCCTGACGGAGCGACGCCGCGTGAATGAAGAAGG  
CCGAAAGGTTGTAAAATTCTTTAAGTTTGAAGAATAATCAGTATAGGGAATGATACTGA  
GATGACGGTAAAACCTGAATAAGCCCCGGCTAATTACGTG

>831 len=161 tot-seq=43

TGGGGAATATTGCACAATGGGGCGAAGCCTGATGCAGCAACGCCGCGTGAGTGATGACGG  
TCTTCGGATTGTAAAGCTCTGTTAATCGGGACGAATGGTCGGTGTGCAAATAGTGCATGG  
ACATGACGGTACCGGAATAGAAAGCCACGGCTAACTACGTG

>832 len=137 tot-seq=43

TGGGGAATATTGCACAATGGGGCGAAAGCCTGATGCAGCAACGCCGCGTGAAGGAAGAAGG  
CCTTCGGGTCGTAAACTTCTGTCCTTGGGGAAGAAGAACTGACGGTACCCAAGGAGGAAG  
CCCCGGCTAACTACGTG

>833 len=140 tot-seq=43

TGGGGAATATTGCACAATGGGGCGAAGCCTGATGCAGCGACGCCGCGTGAGGGATGACGG  
CCTTCGGGTTGTAAACCTCTTTCAGCAGGGACGAAGCGAAAGTGACGGTACCTGCAGAAG  
AAGGACCGGCCAACTACGTG

>834 len=160 tot-seq=43

TAGGGAATCTTCGGCAATGGACGGAAGTCTGACCGAGCAACGCCGCGTGAGTGAAGAAGG  
TTTTCGGATCGTAAAGCTCTGTTGTTGGTGAAGAAGGACAGGGGTAGTAACTGACCTTTG

TTTGACGGTAATCAATTAGAAAAGTCACGGCTAACTACGTG

>835 len=156 tot-seq=43

TGAGGAATATTGGTCAATGGGCGCAAGCCTGAACCAGCCAAGTCGCGTGAGGGAAGACGG  
CCCTACGGGTTGTAAACCTCTTTTGCCGGGGAGCAAGCCTGAGCACGTGTGCCCAGGCGG  
AGAGTACCCGGAGAAAAAGCATCGGCTAACTCCGTG

>836 len=159 tot-seq=43

TAGGGAATCTTCGCAATGGGCGAAAGCCTGATGCAGCCATGCCGCGTGTATGAAGAAGG  
CCTTCGGGTTGTAAAGTACTTTCAGCGGGGAGGAAGGGAGTAAAGTTAATACCTTTGCTC  
ATTGACGTTACCCGCAGAAGAAGCACCCGGCTAACTCCGT

>837 len=230 tot-seq=42

GCCTGATAAAATGGCACTGATGTATATGAACACATAGAGAAAAGAGGCCAACTGCAACAA  
AATGCCAACAGACACAAAAGTCATGCCACCGGAAATGGAGCAGAAATGCTATTTGTGAAT  
CTGCTTCATAAAGGACATTTTTTTAAGCTAATAACATCTTCTATACAATTTACATGT  
ACAATATCACTTAAGCCTCTTTTTGCTCCATATCTAAAGCTGCAGGAAGT

>838 len=155 tot-seq=42

TGAGGAATATTGGTCAATGGGCGTAAGCCTGAACCAGCCAAGTAGCGTGAAGGAAGACTG  
CCCTACGGGTTGTAAACTTCTTTTATACGGGAATAAAGTGAGGCACGTGTGCCTTTTTGT  
ATGTACCGTATGAATAAGCATCGGCTAATTCCGTG

>839 len=136 tot-seq=42

TGGGGGATATTGCACAATGGGGGGAACCCTGATGCAGCGACGCCGCGTGGGTGAAGAAGT  
ATTTCCGGTATGTAAAGCCCTATCGGCAGGGAAGAAATTGGACGGTACCTGACTAAGAAGC  
CCCGGCTAACTACGTG

>840 len=221 tot-seq=42

TAATAGAGAGGCTTTTGCCGGGACGCTGACTGCCAAGTTTGGGAAGCCATAGTCCTAAGG  
TGATAAAAAGCCCAACTTCAGGAACGTAAGTGTAGGGGAGCTTCAGGCATCCAGCAGTC  
CCCAATTCAGGGCAGGTCTTGCTAGTGTCAAACCTCAGCTTCCGGGACTCTCCTGGTGCTC  
AGAAGATGCTCTGTAAAAAACTCCACCACCATTCTCAGG

>841 len=155 tot-seq=42

TGGGGAATATTGCACAATGGGCGAGAGCCTGAACCAGCCAAGTAGCGTGCAGGATGACGG

CCCTATGGGTTGTAACTGCTTTTACGCGGGGATAAAGTGCGTGACGTGTCGCGCATCGC  
AGGTACCGCGTGAATAAGGACCGGCTAATTCCGTG

>842 len=135 tot-seq=42

TGGGGAATCTTGGACAATGGGGGCAACCCTGATCCAGCGACGCCGCGTGGGTGATGAAGG  
CCTTCGGGTCGTAAAGCCCTTTTGCCGGGGAAGATGATGACGGTACCCGGAGAAGAAGCA  
CCGGCTAACTCTGTG

>843 len=155 tot-seq=42

TGAGGAATATTGGTCAATGGCCGGGAGGCTGAACCAGCCAAGTCGCGTGAGGGAAGACGG  
TCCTATGGGTTGTAAACCTCTTTTGTGCGGAGAACAAAACCCGGGACGTGTCCCGGACTGC  
GTGTATCCGAAGAAAAAGCATCGGCTAACTCCGTG

>844 len=135 tot-seq=42

TGGGGGATATTGCGCAATGGGGGAAACCCTGACGCAGCAACGCCGCGTGAAGGAAGAAGG  
TCTTCGGATTGTAACTTCTTTAAGTGTGGAAGAAGATGACGGTACACACAGAATAAGCC  
ACGGCTAACTACGTG

>845 len=155 tot-seq=42

TGAGGAATATTGGTCAATGGGCGCGAGCCTGAACCAGCCAAGTCGCGTGAGGGATGAAGG  
ATCTATGGTTCGTAAACCTCTTTTATAAGGGAATAAAGTGTAGGACGTGTCCTGTTTTGT  
ATGTACCTTATGAATAAGGATCGGCTAACTCCGTG

>846 len=133 tot-seq=41

TCGGGAATATTGCACAATGGAGGAAACTCTGATGCAGTGACGCCGCGTATAGGAAGAAGG  
TCTTAGGATTGTAAGCTATTGTCGTGCAAGAAGAAAATGACTATTGCAGGAGGAAGCCCT  
GGCTAAATATGTG

>847 len=135 tot-seq=41

TGAGGAATCTCCACAATGGGCGAAAGCCTGATGGAGCAACGCCGCGTGAAGGATGAAGG  
CCTTCGGGTTGTAACTTCTTTTATGAGTGAAGAATATGACGGTAACTCATGAATAAGCA  
CCGGCTAACTACGTG

>848 len=136 tot-seq=41

TGGGGAATTTTTCGCAATGGGGGGAACCCTGACGCAGCAACGCCGCGTGCGGGACGAAGG  
CCTTCGGGTTGTAAACCGCTTTCAGCAGGGAAGATTGACGGTACCTGCAGAAGAAGCT

CCGGCTAACTACGTGG

>849 len=226 tot-seq=41

GAGTTTTGTCTCTGCCAGATAATTAAGTTCAGAATGCTAACAAAGCTTTCAAAACAAAACA  
CAACTCAAGTACTCTTTGGATGGGATATAATAAAATGGTTCTATCTGAAATTGCAAACAG  
CTTTGTTGCTGCAAACAAAGGCTCAGTTCTTTGTGCCTCTTTGGCGTGGAGGCCAGAAG  
TACGAGGGTGAAAAGGGTCAATGAAACTCTGAGGGTGTTGCTTCCC

>850 len=135 tot-seq=41

TAGGGAATATTGCACAATGGGCGAAAGCCTGATGCAGCGACGCCGCGTGAGTGATGAAGG  
CCTTCGGGTCGTAAACTCTGTGATATGTGAAGATAATGACGGTAACATATCAGAAAGGA  
CCGGCTAACTTCGTG

>851 len=155 tot-seq=41

TGAGGAATATTGGTCAATGGGCGAGAGCCTGAACCAGCCAAGTAGCGTGAAGGATGAAGG  
TCCTACGGATTGTAAACTCTTTTATACGGGAATAAAGTTTCCTACGTGTAGGATTTGT  
ATGTACCGTATGAATAAGCATCGGCTAACTCCGTG

>852 len=161 tot-seq=41

TGGGGAATCTTCCGCAATGGACGAAAGTCTGACGGAGCAACGCCGCGTGAACGATGAAGG  
TCTTCGGATTGTAAAGTTCTGTGATCCGGGACGAAGGCATTGATTGAGAATATTGATTGA  
TGTTGACGGTACCGGAAAAGCAAGCCACGGCTAACTACGTG

>853 len=143 tot-seq=41

CATGTGGCCAGGGCGGCTCTTGCTTCTCCGGCATCTCAGAAATTTAAAACAGTAATCCCA  
GGACTGAAATAGATGTGTTTGAAGCATCTGTGGCATCTGGAGGCCGCTTCTAATGTATT  
CCTGCACTTGAGGAAGAGCTGGT

>854 len=152 tot-seq=41

TGGGGAATATTGCACAATGGGCGCAAGCCTGATGCAGCGACGCCGCGTGCGGGATGGAGG  
CCTTCGGGTTGTAAACCGCTTTTGTCAAGGGCAAGGCACGGTTTCGGCCGTGTTGAGTG  
GATTGTTCGAATAAGCACCGGCTAACTACGTG

>855 len=160 tot-seq=41

CTAAGAATATTCCGCAATGGACGAAAGTCTGACGGAGCGACGCCGCGTGGATGATGAAGG  
CCGGAAGGTTGTAAAGTCCTTTTATCCGTGAAGAAGAAGATTAAGAGGGAATGCTTAATT



GGTGACGGTAGCGGATGAATAAGCACCGGCTAATTACGTG

>856 len=136 tot-seq=41

TGGGGAATATTGCACAATGGGCGCAAGCCTGATGCAGCAACGCCGCGTGAGGGAAGACGG  
TTTTCGGATTGTAAACCTCTGTCTTTGGTGACGAAGAAGTGACGGTAGCCAAGGAGGAAG  
CCACGGCTAACTACGT

>857 len=173 tot-seq=41

ACACGAGTCTATCCAGGGCAGCCAACAGGCTGGCTAGGAGAAGGAGGGACTAGGGAGTCT  
AAGGAGTGAGAAGGCAGCTGGCAGCTGTTCCGGATGGAATGTCAAAGAGGGAAAAGAGAACA  
GCCCTACAGGAGCCCGTTCATGAGGTGAAGAGCAGGCCAGGAGTGGGTGGAG

>858 len=155 tot-seq=41

TGAGGAATATTGGACAATGGTCGGAAGACTGATCCGGCCATGCCGCGTGACAGGAAGACGG  
CCTTATGGGTTGTAACTGCTTTTGCAGGGGAAGAATAAGGACTACGAGTAGTTTGATGA  
CGGTACTCTGCGAATAAGCATCGGCTAACTCCGTG

>859 len=140 tot-seq=40

TGGGGAATATTGCACAATGGGCGAAAGCCTGATGCAGCAACGCCGCGTGAGGGACGACGG  
CCTTCGGGTTGTAAACCTCTTTTAGCAAGGAAGAAGCGAAAGTGACGGTACTTGCAGAAA  
AAGCGCCGGCTAACTACGTG

>860 len=160 tot-seq=40

TGGGGAATCTCCCAATGGACGAAAGTCTGATGGAGCAACGCCGCGTGAGTGAAGAAGG  
GTTTCGGCTCGTAAAGCTCTGTTGGTAGTGAAGAAAGATACAGGTAGTAACTGGCCTTTA  
TTTGACGGTAATTAAGTAAAGTACAGGCTAACTACGTG

>861 len=182 tot-seq=40

TAGGGAATCTCCACAATGGGCGAAAGCCTGATGGAGCAACGCCGCGTGTGTGATGAAGG  
GTTTCGGCTCGTAAACACTGTTGTAAGAGAAGAATGACATTGAGAGTAACTGTTCAATG  
TGTGACGGTATCTTACCAGAAAGGAACGGCTAAATACGTGCCAGCAGCCGCGTTCAGATC  
GG

>862 len=198 tot-seq=40

TGGGGAATATTGGACAATGGGGGCAACCCTGATCCAGCAATTCTGTGTGCACGAAGAAGG  
TTTTCGGATTGTAAAGTGCTTTCAGCAGGGGAAGAAGGAAGTGACGGTACCTGCAGAAGAA

GCGACGGCTAAATACGTGCCAGCAGCCGCGGAATAGAGAGATCGGAAGAGCGTCGTGTAG  
GGAAAGAGTGGGGAATAT

>863 len=131 tot-seq=40

GAGTTCAAAGTCATCTTTGGTTATAACAACATGCTTGAGGCCAGCCTGGGCTACATGAGAC  
TCTATTTCAAACAACCACAAAAATAGTCATCCACAGAGTAGTCCATGCAACAGGTACAG  
AACGCGTGTTT

>864 len=162 tot-seq=40

AAGAGAAGAAACCCCGGTGGTCCGGTTTAGAAGAGGGGTCCTGGAAGCAGCCTCCCCTCC  
CTGAGACAAAGCAAAGGCCACAGGGCTCTTCGTGCGTGACGTCATCGCTGCAAAGCATGG  
ACATTTAGAGCCAGCGGGGTAGGGCAGCTCACACCAAGTGATC

>865 len=161 tot-seq=40

TGGGGAATCTCCGCAATGGACGAAAGTCTGACGGAGCAACGCCGCGTGAGTGATGAAGG  
TCTTCGGATTGTAAACTCTGTTGTTAGGGACGAAAGCACCGTGTTTGAACAGGTCATGG  
TGTTGACGGTACCTAACGAGGAAGCCACGGCTAACTACGTG

>866 len=161 tot-seq=40

TGGGGAATCTCCGCAATGGACGAAAGTCTGACGGAGCAACGCCGCGTGAGTGATGACGG  
CCTTCGGGTTGTAAAGCTCTGTTAATCGGGACGAAAGTCTCTTTCGAATAGTTAGAGG  
AATTGACGGTACCGGAATAGAAAGCCACGGCTAACTACGTG

>867 len=155 tot-seq=40

TGAGGAATATTGGTCAATGGCCGAGAGGCTGAACCAGCCAAGTCGCGTGAGGGATGACGG  
CCCTACGGGTTGTAAACCTCTTTTGTGAGGGAGCAAGGGGCATCACGAGTGATGCTGTGA  
GAGTACCTGAAGAAAAAGCATCGGCTAACTCCGTG

>868 len=188 tot-seq=40

GCCGGGGCAGGGGTACACAGGTGGGCATGCCTGGATGCCAGCTCACCTGGCGAGCTCAG  
ATGTGCAGGCTTTTTAGGAGACTCTATGAAGTGGAAGTGGAAGATGAACTGAGTGGGGAA  
AATGAAAAGGGGATCTTGGGATGAGGGTCTTACTCTTTGCAAATGCATTGCCTGTGGCAT  
CTCCTTTC

>869 len=155 tot-seq=40

TGGGGAATATTGCACAATGGGCGAAAGCCTGAACCAGCCAAGTAGCGTGACAGGAAGACGG

CCCTATGGGTTGTAACTGCTTTTATGTGGGGATAAAGTGCGTGACGTGTCATGCATTGC  
AGGTACCACATGAATAAGGACCGCTAATTCCGTG

>870 len=211 tot-seq=39

TGAGGAATATTGGTCAATGGGCGCAAGCCTGAACCAGCCATGCCGCGTGCAGGATGACGG  
CTCTATGAGTTGTAACTGCTTTTGTACGAGAATAACGGTGTTTACGTGTAGACATATGA  
ATGTATCGTACGAATAAGGATCGGCTAACTCCGTGTGTTTACGTGTAGACATATGAATGT  
ATCGTACGAATAAGGATCGGCTAACTCCGTG

>871 len=194 tot-seq=39

GTA AACAGGCAGTGTTCTTTTTGCAGAGGCACCCTGCTACCAGCACAGTGACAGGACCC  
AGGCTATGGGTTCTGCCCTAGATAGGTTATGTGTTCTCCCTAAAACATTGATAAATACAT  
AAAATGTGCTATAGAGCTATTTCTGTAAGACTTTCTGGCCAGGCTTCATAGCACAAGATG  
CCTATATCGTTCAT

>872 len=155 tot-seq=39

TGAGGAATATTGGTCAATGGGCGAGAGCCTGAACCAGCCAAGTAGCGTGCAGGATGACGG  
CCCTATGGGTTGTAACTGCTTTTGTATGGGATTAAGTCACCTACGTGTAGGTGTTTGC  
AGTTACCATACGAATAAGCATCGGCTAACTCCGTG

>873 len=136 tot-seq=39

TGGGGAATATTGCACAATGGAGGAACTCTGATGCAGCGATGCCGCGTGAGGGAAGAAGG  
TTTTAGGATTGTAACTCTGTCTTTGGGGACGAAAAATGACGGTACCCAAGGAGGAAGC  
TCCGGCTAACTACGTG

>874 len=154 tot-seq=39

AGGATGTGCCATCTTTGAAAAACACCAGCTGGAAATATAATGTGGTCTTGAAATTCAATA  
AGCTTCAGAAAGAACTTTAGATAGGGAAGAAGACACCCCCTAGAGAACTGCTTGTGGT  
TAGCAAGAATTCAGAAAGCTGAATTTACAAGTCC

>875 len=161 tot-seq=39

TGGGGAATATTGGACAATGGGCGAAAGTCTGACGGAGCAACGCCGCGTGAGTGAAGAAGG  
TCTTCGGATTGTAAAGCTCTGTTATACGGGACGAAAAAGACGGATGCCAACAGTATCCGT  
CCGTGACGGTACCGTAAGAGAAAGCCACGGCTAACTACGTG

>876 len=160 tot-seq=39

TAGGGAATCTCCGCAATGGACGAAAGTCTGACGGAGCAACGCCGCGTGAGTGAGGAAGG  
TCTTCGGATTGTAAACTCTGTTCTTCGGGAAGAACGAATTCGAGAGTAACTGCTCGAAT  
TGTGACGGTACCGAAGGAGAAAAGCCCCGGCTAACTACGTG

>877 len=173 tot-seq=39

TCATGATGAATGGCGAAGGAGCACAAGAACTTATGGGGTGCAGGGAGGTGAGCCGCAG  
GGCCCAGGAGAGGGCAGTGGCATTACTGGTGGGGGACAGCCAGCCAGCCCTCCAAATACA  
CCACACGTACCATAGGCTCTCAAGGGCTCTTCCAGAGGAGGGGGTGGCATCC

>878 len=154 tot-seq=38

TGAGGAATATTGGTCAATGGACGCAAGTCTGAACCAGCCATGCCGCGTGCAGGAAGACGG  
CTCTATGAGTTGTAAACTGCTTTTGTATTAGGGTAAACTCAGGTACGTGTACCTGACTGA  
AAGTATAATACGAATAAGGATCGGCTAACTCCGT

>879 len=136 tot-seq=38

TGGGGAATATTGCACAATGGGGGAAACCCTGATGCAGCGACGCCGCGTGGGCGACGAAGC  
GCTCCGGCGCGTAAAGCCCTGTCAGCAGGGAAGAAAAAAGACAGTACCTGACCAAGAAGC  
CCCGGCTAACTACGTG

>880 len=138 tot-seq=38

TAGGGAATATTGGGCAATGGGCGCAAGCCTGACCCAGCAACGCCGCGTGAGGGAAGAAGG  
TTTTCGGATTGTAAACCTCTGTCCTATGTGACGAAGGAAGTACGGTAGCATAGGAGGAA  
GCCCCGGCTAACTACGTG

>881 len=211 tot-seq=38

TATGCGACGGCCATCTATTGAACAAGGAATCGTGGAAGCAGAACACAGCCCATCAGCAGA  
TCCTCCTGTGTCCAAGACCTACCTGCCAGCCACCACCTACCACACATTTCTCAAGCCA  
AGCCTGGGGACAAGGGCAGACCCAGGAGCCACCAGCATCAACCACCTTCCTTCCCTAGAA  
AACAGGACACCTCCACATACACCCCCTCAA

>882 len=135 tot-seq=38

TGGGGAATATTGCACAATGGGCGCAAGCCTGATGCAGCGACGCCGCGTGAGTGAAGAAGT  
ATTTCCGGTATGTAAAGCTCTATCAGCAGGGAAGATAATGACAGTACCTGACTAAGAAGCT  
CCGGCTAAATACGTG

>883 len=155 tot-seq=38

TGAGGAATATTGGTCAATGGGAGAGATCCTGAACCAGCCAAGCCGCGTGAGGGAAGACGG  
TCCTATGGGTTGTAAACCTCTTTTGTACAGGGAGCAAAAAGTCCACGCGTGGCAGGATGA  
GAGTACCTGAAGAAAAAGCATCGGCTAACTCCGTG

>884 len=138 tot-seq=38

TGGGGAATATTGGGCAATGGGCGCAAGCCTGACCCAGCAACGCCGCGTGAAGGAAGAAGG  
CTTTCGGGTTGTAAACTTCTTTTCTGGGGGACGAAGAAAGTGACGGTACCCAGGAATAA  
GCCACGGCTAACTACGTG

>885 len=138 tot-seq=38

TGGGGAATATTGGGCAATGGGCGCAAGCCTGACCCAGCAACGCCGCGTGAAGGAAGAAGG  
CTTTCGGGTTGTAAACTTCTTTTATGAGGGACGAAGGAAGTGACGGTACCTCATGAATAA  
GCCACGGCTAACTACGTG

>886 len=136 tot-seq=38

TGGGGAATATTGCACAATGGGGGAAACCCTGATGCAGCGACGCCGCGTGAGCGAGGAAGT  
ATTTCCGGTATGTAAAGCTCTATCAGCAGGGACGAAAAAAGACGGTACCTGACTAAGAAGC  
CCCGGCTAACTACGTG

>887 len=154 tot-seq=37

TAGGGAATATTGGTCAATGGGCGGAAGCCTGAACCAGCCATGCCGCGTGATGGATGACGG  
CCTTAGGGTTGTAAACATCTTTTCTGCTAGAGGAATATAGTTCACGTGTGGACAGACGAC  
TGTATAGCAGGAATAAGGATCGGCTAACTCCGTG

>888 len=178 tot-seq=37

GGAGTTATGGATAAGAAATCTGGAGGCACCCACCCACCCCTGGCTCCCAGTCAATCACT  
TGACAGCTGTGTTGCCTTCGGTGTACCTAGCCCCTGGGTGCTTCAGTGTCTGCAGGTGT  
TAAATAAAAAAGGGATAACAATAGTAATAACCAAAAAGGGATAACAATAGTAATAACC

>889 len=202 tot-seq=37

AGTTGCAGGACGCAGAGGTGGAGTCTTCTGCCAAGTCTGGGAAGCCTTAAGGAAAGGAGT  
GCCCGTCGGCGTCTTGGTCTCCTGTCCCTGCTGCAGGGGCTGGGGCCTCCGGAGCTGCT  
GCGGGCTCCCCTCAGGCTCTGCTTCGTGACCCGTGACCCATGACCCACAGTGTGGCCTC  
CTGTGGGGCCACTATAGCAGCC

>890 len=135 tot-seq=37

TGGGGGATATTGCACAATGGGGGAAACCCTGATGCAGCAACGCCGCGTGAGGGAAGAAGG  
TTTTCGGATTGTAAACCTCTGTCCTAGGTGAAGATAATGACGGTAACCTGGGAGGAAGCT  
CCGGCTAACTACGTG

>891 len=134 tot-seq=37

GCGCGCAAATTACCCAATCCCAACACGGGGAGGTAGTGACAATATGTAACAATATACGGC  
CTTATACGTCGTATAATTGGAATGAGTACAATTTAAATCCCTTAACGAGGAACAATTGGA  
GGGCAAGTCTGGTG

>892 len=155 tot-seq=37

TGAGGAATATTGGTCAATGGACGGGAGTCTGAACCAGCCAAGTAGCGTGAAGGATGACTG  
CCCTATGGGTTGTAAACTTCTTTTATACGGGAATAAAGTGATCCACGTGTGGATTTTTGT  
ATGTACCGTATGAATAAGGATCGGCTAACTCCGTG

>893 len=160 tot-seq=37

TGGGGAATATTGCACAATGGGGGAAACCCTGATGCAGCGACGCCGCGTGAGTGATGAAGG  
TCTTCGGATCGTAAACTCTGTTATTAGGGAAGAACAATGTGTAAGTAACTATGCACGT  
CTTGACGGTACCTAATCAGAAAGCCACGGCTAACTACGTG

>894 len=161 tot-seq=37

TAGGGAATCTTCGGCAATGGACGAAAGTCTGACCGAGCAACGCCGCGTGAGTGAAGAAGG  
TTTTCGGATCGTAAAGCTCTGTTGTAAGTCAAGAACGTGTGTGAGAGTGAAAAGTTCACA  
CAGTGACGGTAGCTTACCAGAAAGGGACGGCTAACTACGTG

>895 len=155 tot-seq=36

TGAGGAATATTGGTCAATGGACGAGAGTCTGAACCAGCCAAGTCGCGTGAAGGAAGACGG  
TTCTATGAATTGTAAACTTCTTTTGTGCAGGAATAAAGTGGGTTACGTGTAACCTTTTGT  
ATGTAAGTACGAATAAGGATCGGCTAACTCCGTG

>896 len=163 tot-seq=36

AAAAACAGCATGTCAGATTTCTTGGACAGGAAGAAAACCTGGAAGAATGGCAGTATTACC  
CCAGGTGACAGAGCTCTGTAAATCTCAGAGTTCAGGAGCTGTGGTTGAGCTCTCTTAACA  
CCTGCTTCTTTGGCCAAGAAAGATGAAAACAACAACAAAAC

>897 len=143 tot-seq=36

TAGGGAATCTTCGGCAATGGACGGAAGTCTGACCGAGCAACGCCGCGTGCGGGATGAAGG

CCTTCGGGTTGTAAACCGCTTTTGATTGGGAGCAAGCCTTTGGGTGAGTGTACCTTTCG  
AATAAGCGCCGGCTAACTACGTG

>898 len=161 tot-seq=36

TGGGGAATATTGGACAATGGGCGAAAGCCTGATCCAGCCATGCCGCGTGTGTGAAGAAGG  
CCTTTTGGTTGTAAAGCACTTTAAGCGAGGAGGAGGCTACTGGTATTAATACTACCGGAT  
AGTGGACGTTACTCGCAGAATAAGCACCGGCTAACTCTGTG

>899 len=133 tot-seq=36

TGGGGAATATTGCACAATGGGGGAAACCCTGATGCAGCGACGCCGCGTGATTTAGAAGGC  
CTTCGGGTTGTAAAATCTTTTGTATGGGAAGAAAATGACAGTACCATACGAATAAGGAC  
CGGCTAATTACGT

>900 len=172 tot-seq=36

TAGGGAATCTCCACAATGGGCGCAAGCCTGATGGAGCAACACCGCGTGAGTGAAGAAGG  
GTTTCGGCTCGTAAAGCTCTGTTGTTGGTGAAGAAGGATAGAGGTAGTAACTGGCCTTTA  
TTTGACGGTAATCAACCAGAAAGTCACGGCTAACTACGTGGGGGCAGCCGCG

>901 len=161 tot-seq=36

TGGGGAATATTGGACAATGGGGGGAACCCTGATCCAGCCATGCCGCGTGTGTGAAGAAGG  
CCTTTTGGTTGTAAAGCACTTTAAGCGAGGAGGAGGAGCTCTTGGTTAATACCCAAGATG  
CTTGGACGTTACTCGCAGAATAAGCACCGGCTAACTCTGTG

>902 len=135 tot-seq=35

TGGGGAATATTGGACAATGGGCGCAAGCCTGATCCAGCCATGCCGCGTGAGTGATGAAGG  
CCTTAGGGTTGTAAAGCTCTTTTGCCGGGGACGATAATGACGGTACCCGGAGAATAAGTC  
CCGGCTAACTTCGTG

>903 len=123 tot-seq=35

GAACAGAAAGGATCATGGGAGGGAAGCAGGACAGCCACTGCATCAGCATGGCATACTTC  
AGCCCCGCTCCAGTCAATCTGATGACATCAGAACTGTCCGTCTCCCTTCTACCCCTGAC  
CCT

>904 len=230 tot-seq=35

TTCTTACTGTGCCTAATTTATACATTAATAATTATCATGGTTATGTATGTGTAGGAAAA  
CCAGTGGGTGATTCGGTACTATTTGTGGTCTCAGGCATTCAGTGGGGGTGTCTTAGAATG

TTATCTCCCATAGTTAATGGGGAACACTACTGCACTTATTTTGTGTAACACAACACAGCCT  
CTCTAGCTCTTCAGTTAAACTTTTCAGTTTAGAATAAAACACCCTATCA

>905 len=138 tot-seq=35

TGGGGAATATTGGGCAATGGGGGAAACCCTTACCCAGCAACGCCGCGTGAAGGAAGAAGG  
TTTTCGGATTGTAACTTCTGTCCTAAGAGAAGAAGAAAGTGACGGTATCTTAGGAGGAA  
GCCCCGGCTAACTACGTG

>906 len=161 tot-seq=35

TAGGGAATCTTCCACAATGGACGCAAGTCTGATGGAGCAACGCCGCGTGAGTGAAGAAGG  
TCTTCGGATTGTAAACTCTGTTATACGGGACGAAAAAGACGGATGCCAACAGTATCCGT  
CCGTGACGGTACCGTAAGAGAAAGCCACGGCTAACTACGTG

>907 len=121 tot-seq=34

GTAGGGTTTGACCTGGCAGGTTTCATCTGAAACCAGTTTGTTCCTTTACAGAGCACATGC  
CTGGCTGCCTGAAGCAGTTGACCAGAACTTGCAGCCAAACCACGTGGTTTTGGTCAAATT  
C

>908 len=136 tot-seq=34

TGGGGAATCTTGCGCAATGGGGGAAACCCTGACGCAGCGACGCCGCGTGCGGGACGAAGG  
CCCTCGGGTCGTAAACCGCTTTCAGCAGGGATGAGACAAGACGGTACCTGCAGAAGAAGC  
CCCGGCTAACTACGTG

>909 len=138 tot-seq=34

TGGGGAATATTGGGCAATGGGCGAAAGCCTGACCCAGCAATGCCGCGTGAAGGACGAAGG  
TCTTCGGATTGTAACTTCTTTGATCAGGGACGAATAAATGACGGTACCTGAAGAACAAG  
CCACGGCTAACTACGTGG

>910 len=161 tot-seq=34

TAGGGAATCTTCCGCAATGGGCGAAAGCCTGACGGAGCGACGCCGCGTGAGCGAAGAAGG  
CCTTCGGGTCGTAAAGCTCTGTTGTGAGGGACGAAGGAGCGCCGTTTCAAGAGGGCGGCG  
CGGTGACGGTACCTCACGAGAAAGCCCCGGCTAACTACGTG

>911 len=160 tot-seq=34

TAGGGAATCTTCCGCAATGGACGAAAGTCTGACGGAGCAACGCCGCGTGAGTGATGAAGG  
TTTTCGGATCGTAAAGCTCTGTTGTTAGGGAAGAACAAGTGCAAGAGTAACTGCTTGAC



CTTGACGGTACCTAACCAGAAAGCCACGGCTAACTACGTG

>912 len=161 tot-seq=34

TGGGGAATCTCCACAATGGGCGAAAGCCTGATGGAGCAACGCCGCGTGAGTGAAGAAGG  
TCTTCGGATCGTAAAGCTCTGTTGCACGGGACGAAAACCGAGCTTGAGAATATTGAGTTT  
GGGTGACGGTACCGAGCGAGGAAGCCACGGCTAACTACGTG

>913 len=225 tot-seq=34

GTGGCTCTTCTTCAGGGCTTCATTTAGGCCTGTGCTTTGGGCCCAAGTCTGGGTACAAC  
CTTCGCAGAGACAGAATCATGACTTCCCATCTATTCTCCTAGGGATGTGCCAGGGTCCAG  
GGCCTGGCTGGCTAATAGTAGAGACAACCTGATGGTGGGTTTGCCTCCTGACTGTGGGT  
AGAAGGAGGTCAGGAGCAACTTTTCAGGGCCTTACATTCTTGT

>914 len=137 tot-seq=34

TGAGGGATATTGGGCAATGGGGGAAACCCTGACCCAGCAACGCCGCGTGAGGGAAGAAGG  
TCTTCGGATTGTAAACCTAAGTAGTCAGGGACGAAGAAATGACGGTACCTGAAGAGTAAG  
CTCCGGCTAACTACGTG

>915 len=196 tot-seq=34

TCCGAGGAATTTTGATGGTTTTTGGACAGCAAGTCAGAATATTTGGAATTGGGACTATTT  
GGGGGTTTAAATTGTAAAGAAGAGCTTGAGAGGGAATGTTGAGGCACAAGGACAGATGAA  
CTATAGGTAGCTGTAGACAAAATTCAAGTCAGTTTTAAAAATGATGAGTTGAAAATAAAC  
CATGAAACTGAATTAG

>916 len=155 tot-seq=34

TGAGGAATATTGGTCAATGGGCGAGAGCCTGAACCAGCCAAGTAGCGTGCAGGAAGACGG  
CCCTATGGGTTGTAAACTGCTTTTATAAGGGAATAAAGTGAGCCTCGTGAGGCTTTTTGC  
ATGTACCTTATGAATAAGGACCGGCTAATCCGTG

>917 len=116 tot-seq=34

TAGGGAATCTCCACAATGGACGCAAGTCTGATGGAGCAACGCCGCGTGAGTGAAGAAGG  
GTTTCGGCTCGTAAAGCTCTGTTGTTGGGGAAGAAGGACAGGGGGAGTAACTTAAA

>918 len=160 tot-seq=34

TGGGGAATATTGCGCAATGGGGGAAACCCTGACGCAGCGACGCCGCGTGCGGGATGAAGG  
TCTTCGGATTGTAAAGTGCTGTTATAAGGGAAGAACATTTGCAATAGGAAATGATTGCAG

ACTGACGGTACCTTGTTCAGAAAGCGATGGCTAACTATGTG

>919 len=134 tot-seq=33

GACCCAGCTCTCCCAGGTAGCAGGAAAGAGGCCACTGGTAATTAGGGACCAGATTTGAAT  
GTGATGTGGAGAAGCCATGTGAAAGTACCCCCAGAGGAGGGCAGGCATGGCCCCTGGTCC  
CCAGTTCCATTTGC

>920 len=135 tot-seq=33

TGGGGAATATTGCACAATGGGGGAAACCCTGATGCAGCAACGCCGCGTGAGTGATGACGG  
TCTTCGATTGTAAAGCTCTGTCTTTAGGGACGATAATGACGGTACCTAAGGAGGAAGCC  
ACGGCTAACTACGTG

>921 len=142 tot-seq=33

TGAGGAATATTGGTCAATGGACGAGAGTCTGAACCAGCCAAGTAGCGTGCGGGATGAAGG  
CCTTCGGGTTGTAAACCGCTTTCAGCAGGGACGAGGCCGCAAGGTGACGGTACCTGCAGA  
AGAAGCCCCGGCTAACTACGTG

>922 len=143 tot-seq=33

TGGGGAATATTGCACAATGGGCGCAAGCCTGATGCAGCCATGCCGCGTGTATGAAGAAGG  
CCTTCGGGTTGTAAACCGCTTTTGATTGGGAGCAAGCTTTCGGGTGAGTGTACCTTTCGA  
ATAAGCGCCGGCTAACTACGTGG

>923 len=157 tot-seq=33

AAACCACACTGCTCAGCTTCCCAGGAGGGAAAGGTAAGGAGAAGGCCAGGTATGGACGC  
TGCATCGCCTGTCATCCTGGAAGCCCTTCCCAAAGCTCATGATGGGCTGGCCAGAGGAA  
GCTACCATAGCCCCGCCAGAGTCTGCTCACTCTACCA

>924 len=161 tot-seq=33

TAGGGAATCTTCCGCAATGGACGAAAGTCTGACGGAGCAATACCGCGTGAGTGATGAAGG  
TCTTCGGATCGTAAACTCTGTTGTTAGGGAAGAACAAGTGCTAATCTAATACATTAGTG  
CCCTGACGGTACCTAACAGAAAGCCCCGGCTAACTACGTG

>925 len=197 tot-seq=33

GATATTAAGATATAATAAGGGAGGAAGAAGGGGGGAATCTTCCACAATGGACGCAAGTCT  
GATGGAGCAACGCCGCGTGAGTGAAGAAGGGTTTCGGATAGTAAAGATATGTTGTTGGTG  
AAGAAGGAAAGGGGTAGTAAATGAAATTTGTTTGACGGTAATCAATTAGAAAGTCACGGC

TAACTACGTGCTACGTG

>926 len=176 tot-seq=33

GCAGGGTACATGTGCATTGGCTGAGGTGGGGTCTGGTGGGAGCAAGGCTGCTATGTTCC  
TGTGCATGCTCATGTTGGTGGTGTATGATGGCAGTGGCAGAATGCTGGATGGATCAGGGCT  
TCTAGTCTCTGTGTGTGAGTTTGCAGCCATGATGGTGGCTGCATGGGAGGAGGTTG

>927 len=205 tot-seq=33

TGGGGAATATTGCACAATGGGCGCAAGCCTGATGCAGCCATGCCGCGTGTATGAAGAAGG  
CCTTCGGGTTGTAAAGTACTTTTCAGCGAGGAGGAAGGCATTAAGGTTAATAACCTTGGTG  
ATTGACGTTACTCGAGAAGAAGCACCGGCTAACTCCGTGGGGGGAGCCGCGTAATGCA  
GAGATCGGAAGAGCGTCGTGGGGGG

>928 len=138 tot-seq=33

TGGGGAATATTGGGCAATGGGCGAAAGCTTGACCCAGCGACGCCGCGTGAGGGAAGAAGG  
TCTTCGGATTGTAAACCTCTTTCAGCAGGGAAGAAGAAAGTGACGGTACCTGCAGAAGAA  
GTCACGGCTAACTACGTG

>929 len=160 tot-seq=33

TGGGGAATATTGGACAATGGGCGAAAGCCTGATCCAGCCATGCCGCGTGTGTGAAGAAGG  
CCTTCGGGTCGTAAAGCACTTTAAGTTGGGAGGAAGGGCTCATAGCGAATACCTGTGAGT  
TTTGACGTTACCAACAGAATAAGCACCGGCTAACTTCGTG

>930 len=218 tot-seq=33

CAACTTAACACAACCTTAAACTAGACCCGTGTCTGACTGTCAGCGAGAGCACTGCCAGAG  
AAGCTAGAGAGAGAGGAAACCCACCACGAATGTGGCAGAACTATCCTGTGAAGTGGGGTT  
CGAGACCGAAATAAAGAGGGGCAATGAGAAAGCCAGGTGAGTACTCTTCTCTGCTTCT  
GATCTGCAAAGATGCGAGCAGGCAGCCTCATGGAAACT

>931 len=199 tot-seq=33

TGAGGAATATTGGTCAATGGACGAGAGTCTGAACCAGCCAAGTAGCGTGAAGGATGACTG  
CCCTATGGGTTGTAAACTTCTTTTATATGGGAATAAAACGTTCCACGTGTGGGATTTTGT  
ATGTACCATATGAATAAGGATCGGCTAACTCCGTGCCAGCAGCCGCGTAATAAGAAGAT  
CGGAAGAGCGTCGTGTAGG

>932 len=155 tot-seq=33

TGAGGAATATTGGTCAATGGGCGAGAGCCTGAACCAGCCAAGTCGCGTGAGGGACGACGG  
CCCTACGGGTTGTAAACCTCTTTTGCCGGGGGACAAACGGCGGCACGCGTGCCGTCCTGA  
GGGTACCCGGAGAAAAGCATCGGCTAACTCCGTG

>933 len=140 tot-seq=33

TGGGGAATATTGCACAATGGGCGGAAGCCTGATGCAGCGACGCCGCGTGGGGGATGACGG  
CCTTCGGGTTGTAAACCTCTTTTCGACAGGGACGAAGTGAAAATGACGGTACCTGTATAAG  
AAGCACCGGCTAACTACGTG

>934 len=144 tot-seq=33

GGGGAGAGGCAGCAGCAAGGTGAGAGGCAGCAGCAAGGTGAGAGGCAGCAGCAAGGTGAG  
AGGCAGCAGCAAGGAGAGAGGCAGCAGCAAGGAGAGAGGCAGCAGCAAGGAACAGAGCCG  
GCTCCTCAGGGCTAGGGACATGGA

>935 len=154 tot-seq=33

TGGGGAATATTGCACAATGGGCGCAAGCCTGATGCAGCGACGCCGCGTGAGGGATGAAGG  
CCTTCGGGTTGTAAACCTCTTTTCGTCAGGGAACAAGGCACTGCTTTTTGGTGGTGTGAG  
GGTACCTGGATAAGAAGCGCCGGCTAACTACGTG

>936 len=161 tot-seq=33

TGGGGAATATTGGACAATGGGGGGAACCCTGATCCAGCCATGCCGCGTGTGTGAAGAAGG  
CCTTTTGGTTGTAAAGCACTTTAAGCGAGGAGGAGGCTACCTAGATTAATACTTTAGGAT  
AGTGGACGTTACTCGCAGAATAAGCACCGGCTAACTCTGTG

>937 len=161 tot-seq=33

TAGGGAATCTTCGGCAATGGGGGCAACCCTGACCGAGCAACGCCGCGTGAGTGAAGAAGG  
TTTTCGGATCGTAAAGCTCTGTTGTTAGAGAAGAATGATGGTGGGAGTGAAAAATCCACC  
AAGTGACGGTAACTAACCAGAAAGGGACGGCTAACTACGTG

>938 len=136 tot-seq=32

TGAGGAATCTTGGACAATGGGCGAAAGCCTGATCCAGCCATGCCACGTGAGGGATGAAGG  
CTAAATAGGTTGTAAACCTCTAACTCTAGCTTAGATTATGACATGGGGTAGGGGAAAAGT  
CCCGGCTAACTCCGTG

>939 len=166 tot-seq=32

TCTGGTGTGGAATGGCCAACTAGCCAAAAACACCTGTAGAGGCAAACCTGCGGGTTGCA

GGTTGAGGGCAGGCCGTCAGGACACTCTCCTACCACTACCACCTCCCCAGCCCCAGCCC  
ACATGCTATCCTCCCCTTCACTGTGTGCAAGGTGCCCAAGGGTCTG

>940 len=179 tot-seq=32

TGGGGAATATTGGACAATGGGCGCAAGCCTGATCCAGCAATGCCGCGTGAGTGATGAAGG  
CCTTCGGGTCGTAAAGCTCTTTTACCAGGGATGATAATGACAGTACCTGGAGAATAAGCT  
CCGGCTAACTCCGTGCCAGCAGCGCGGTAATCATCAGATCGGAAGAGCGTCGTGTAGTG

>941 len=183 tot-seq=32

CTCCCCGACGCTGTGCTTCCACAGCGCCAGTGCTCTGCCAGCTCCTGCACTCACAACTCT  
CGTCCTAGGTGACCCAGTCCCCACCCAGGCTCCTGCCATCACCCAGCGCCAGCAACTCTC  
ACAGCTCCTCTAGCCTGGGCCTTCCCTCTACGCTCCAGGCCAGCTCCCCAGCACGTG  
GTG

>942 len=192 tot-seq=32

GGGTTGTGGGCCTGGAGCCCACTGCTGGACCCCAACACATACCACCCATTTTAAACCAG  
CCCTTGTCAAGGTCCCGTAGCTTAAGTCATTGACTTATGGCACCAAAGTGATTTTTAAA  
TTCTTACTGACCCAAAACCAGTTCTGAATAAACAGGCAGTTCTCAGGGTGGTTAGCAGAC  
ACCCGCTCCACC

>943 len=140 tot-seq=32

TGGGGAATATTGCACAATGGGGGGAACCCTGATGCAGCGACGCCGCGTGCGGGATGACGG  
CCTTCGGGTTGTAAACCGCTTTCAGTAGGGAAGAAGCGAAAGTGACGGTACCTGCAGAAG  
AAGTACCGGCTAACTACGTG

>944 len=160 tot-seq=32

TGGGGAATCTTGGACAATGGGGGCAACCCTGATCCAGCAATGCCGCGTGGGTGAAGAAGG  
CCTTCGGGTTGTAAAGCCCTTTCGGCAGGGAAGAAATCGGCGGGGCGAATAACCCTGCTG  
GATGACGGTACCTGCAGAAGAAGCACCGGCTAACTACGTG

>945 len=135 tot-seq=32

TAGGGAATTTTGCGCAATGGGGGAAACCCTGACGCAGCAACACCGCGTGAATGTTAAGCC  
CTTCGGGGTGTAAAGTTCTGTCAATAGGGACGAATTTTACTGTACCTATAAAGGAAGCA  
CCGGCTAACTCCGTG

>946 len=135 tot-seq=32

TGGGGAATATTGCACAATGGGCGAAAGCCTGATGCAGCAACGCCGCGTGAGTGATGACGG  
CCTTCGGGTTGTAAAGCTCTGTCTTTGGGGACGATAATGACGGTACCCAAGGAGGAAGCC  
ACGGCTAACTACGTG

>947 len=155 tot-seq=32

TAGGGAATTTTCGGCAATGGGGGCAACCCTGACCGAGCAACGCCGCGTGAGTGATGAAGG  
TCTTCGGATTGTAAAGCTCTGTTGTAAGGGAAGAACGGCATCTAGAGAATAGATGAGTGA  
CGGTACCTTACCAGAAAGCTACGGCTAACTACGTG

>948 len=226 tot-seq=32

GAGGCTGTGGGGCAGGTGACCGACCACACAGGGTCTAGTTACATAGCCTAGGGTGAACAG  
GCTTGGGGACTGTTACCCCCTCACTTCACTAAACAAATTTGTGCCCTACCAAGAACTC  
ACACCTACCTAACCTCTAAAGGTAGCTGCATTAAAACTGGGGTCTCTGCCGAGTCAGC  
TAAAGGTCTGAAACATGAGGGCTGGACCTAAGGAGAGGGATGTGGG

>949 len=137 tot-seq=32

CGAGGAATCTTGGGCAATGGGCGAAAGCCTGACCCAGCGACGCCGCGTGAGGGATGAAGG  
CCTTCGGGTCGTAAACCTCTTTTGTGAGGGAAGAAGTTCTGACGGTACCTCACGAATAAG  
CCACGGCTAACTACGTG

>950 len=194 tot-seq=32

CACATGGTAGGCAGGACATTTCAATTGGTCCGATCTTTCTCTGTAGGGGAATGTCCAGTG  
TATTAGAGAAGGAGGCGGGCAGGAGGCTCTGCGGAAGAAAATGAGAGTGGGGATTGGGGA  
AGGCAGGCTAGGGCAGCCCTGTGGCTTGGGAAGCAGGGAAGTGGGATGATCAGAACCATT  
TTAAGAAGATTAAG

>951 len=160 tot-seq=32

AAGACAAGAAGGAGAAAGAAAAAAGGGGATGTGCAGAGAGGGAAGAGTGACCAGAGACG  
GCTTGAAGGACTAAGTTGAACAGAATAATACCCTTAAACACCCTGATTCTGAGACAGAT  
GAAAGGAGTTCAAAAACAAAAACAAAAAGTCAAAATGTA

>952 len=159 tot-seq=32

TGGGGAATATTGGACAATGGGGGCAACCCTGATCCAGCAATGCCGCGTGTGTGAAGAAGG  
CCTGCGGGTTGTAAAGCACTTTCAGAGGGGAAGAAAAAATCGGAATTAACACTTCCGAGC  
TTGACGTTACCCTTAGAAGAAGCACCGGCTAACTCCGTG

>953 len=156 tot-seq=32

TGAGGAATATTGGTCAATGGACGTAAGTCTGAACCAGCCAAGTAGCGTGCAGGATTGACG  
GCCCTATGGGTTGTAAACTGCTTTTGTGGGGAGTAAAGTGAGGCACGCGTGCCTTTTTG  
CATTTACCCTTCGAATAAGGACCGGCTAATCCGTG

>954 len=159 tot-seq=32

TAGGGAATCTTCGGCAATGGACGGAAGTCTGACCGAGCAACGCCGCGTGAGTGAAGAAGG  
TTTTCGGATTGTAAAGCTCTGTTAATCGGGACGAATGGTCGGTGTGCAAATAGTGCATGG  
ACATGACGGTACCGGAATAGAAAGCCACGGCTAACTACG

>955 len=160 tot-seq=32

TGGGGAATATTGCACAATGGGGGAAACCCTGATGCAGCCATGCCGCGTGTGTGAAGAAGG  
CCTTCGGGTTGTAAAGCACTTTCAGCGAGGAGGAAAGGTGGTTGGCTAATACCCAATCGC  
TGTGACGTTACTCGCAGAAGAAGCACCGGCTAACTCCGTG

>956 len=162 tot-seq=32

GGCTTCTCGGTACAGAAAATGGTGA ACTCTCAGTCTTCTGCCCTGGCCATGCTCAGCTG  
AACAAAACCACACCAGCTGGTCTCACTTAAATTCAGGATTACCATCGGAGGCGGGGGTTG  
TGGGGAGGCTCTTAACGCTGCCAGAACCCCAAATGACACTTC

>957 len=196 tot-seq=32

TCAGACCTGGGGTGACAGGGGACAAATGCAGGGAGGGGATCTCGTCAGTGGATTCTGAGA  
GCCCCAGGAGTCTCAGATGGAGGGCATGTCTTCAGAGCCCTTTGTCGTGAAACACAGGAA  
TGGTTGTAATGCCAGAGTCAGCTATGCCAACTTGGTGAAGCAAGATGCAGTGAGGGCCT  
CTGAGGGAACTTAACC

>958 len=142 tot-seq=32

TGAGGAATATTGGTCAATGGGGGAAACCCTGACGCAGCGACGCCGCGTGCGGGATGAAGG  
CCTTCGGGTTGTAAACCGCTTTTGATTGGGAGCAAGCCTTCGGGTGAGTGTACCTTTCGA  
ATAAGCGCCGGCTAACTACGTG

>959 len=154 tot-seq=31

CCCTCCTTTTTCTTTCTTTCCATTTTTTAAAATAACCCATTGAGTCCAGTTGGTGCTG  
CCCATATGTACATGGGTGTCGGGTACCCGCTGGGATGAACAGCACACTGAAGACCACAC  
CCCTAAAGCAAAACAGCCTCCCCTCCCCAATAG

>960 len=160 tot-seq=31

TGGGGAATTTTGGACAATGGGCGCAAGCCTGATCCAGCCATGCCGCGTGAGTGAAGAAGG  
CCTTCGGGTTGTAAAGCTCTTTTCGGCCGGAACGAAATCGCATCCTCTAATACGGGGTGTG  
GATGACGGTACCGGAAGAAGAAGCACCGGCTAACTACGTG

>961 len=135 tot-seq=31

TGGGGAATATTGCACAATGGAGGAACTCTGATGCAGCGACGCCGCGTGAGTGAAGAAGT  
ATCTCGGTATGTAAAGCTCTATCAGCAGGGAAGAAGATGACGGTACCTGCAGAAGCAGCC  
CCGGCTAACTACGTG

>962 len=160 tot-seq=31

TGGGGAATTTTGGACAATGGGGGAAACCCTGATCCAGCAATGCCGCGTGAGTGAAGAAGG  
CCTTCGGGTTGTAAAGCTCTTTTGTTCAGGGGAAGAAATTGATTGGGCTAATATCCCGATTA  
GATGACGGTACCTGAAGAATAAGCACCGGCTAACTACGTG

>963 len=182 tot-seq=31

GAAGTGCGGAGGGGTGGGACAATTTCTTCTTAGGGAACTTTATTCCTTGAGGGTGTCT  
TGTGCAGTTGAGGCTGTTTCCCTTTAGAGGGGATCAGCATGGAACAAATGAGCTGGTGTG  
GACACAGCCGCGAGGAATGTGGTTGGAACAGGGAAGCCCAGCCCTCAAGTACCAAGGAGA  
CC

>964 len=144 tot-seq=30

TGAGGAATATTGGTCAATGGACGCAAGTCTGAACCAGCCAAGTAGCGTGCAGGATGACGG  
CCTTCGGGTTGTAAACCGCTTTTGATTGGGAGCAAGCTTTCGGGTGAGTGTACCTTTCGA  
ATAAGCGCCGGCTAACTACGTGTG

>965 len=154 tot-seq=30

TAGGGAATATTGGGCAATGGTCGGAAGACTGACCCAGCCATGCCGCGTGCAGGAAGAAGG  
CGTTATGCGTTGTAAACTGCTTTTATACGGGAAGAAAAAGCAACTGCGGTTGAAATTGCC  
GGTACCGTATGAATAAGCACCGGCTAACTCCGTG

>966 len=156 tot-seq=30

TGAGGAATATTGGTCAATGGACGCGAGTCTGAACCAGCCAAGTAGCGTGCAGGATGACGG  
CCCTATGGGTTGTAAACTGCTTTTGC GCGGGGATAACACCCTCCACGTGCTGGAGGTCTG  
CAGGTACCGCGCAATAAGGACCGGCTAATTCCGTG



>967 len=181 tot-seq=30

GACCAACCTGAGCCACCAACCTCTCACCCCTCCAGCAGGCAGGCCTGGCCTTCACATTT  
GGCCCCCTCTCCGGAGGGACAGATGACAGGTTCCACGTGCCTGTCATTTTCCAGCTGCAG  
CTGAGGGTGAGACATTGCCCCCAGGCCATACACTCACTCCCCAGCACCCCTTCCCCA  
A

>968 len=192 tot-seq=30

GTGGAGAGCTCTCTGGCCCTGGCCCCAATCCCACCACCCTGAGCTCACATCCTCAGGAAG  
GAGGGCATCACAGCGTGAAGCCGTGTGTGCGCAAGGTGCCTTCCACGGTGCAGGATGGGA  
GGAGCCGTATGCTCGTTGCTCCAGAGCCGCGTAATAAGTAGATCGGAAGAGCGTCGTGT  
AGGGAAAGAGTG

>969 len=207 tot-seq=30

AATATCTCTATGTCCATCAGTCTATACACACAAAAGCAACCGTGTGGTACATCTATTCAA  
TGGGATACTACTAAGATTTGTAAAGACATGTCTCTGGACACATGCCACAGTGGAACCCAA  
GAACATCATATGCTATGTGAAAGAAGTCAGCCCCAAAGGCCGTGTGTATTGTATGATCTG  
CTCCTACAGGAGTGGGAGAGTTAGAGA

>970 len=160 tot-seq=30

TAGGGAATCTCCGCAATGGACGCAAGTCTGACGGAGCAACGCCGCGTGAGTGAGGAAGG  
CCTTCGGGTCGTAAAGCTCTGTTGCCAGGGAAGAACGGGTGGAAGAGTAACTGCTTCCGC  
CATGACGGTACCTGAGAAGAAAGCCCCGGCTAACTACGTG

>971 len=154 tot-seq=30

TGAGGAATATTGGTCAATGGGCGGGAGCCTGAACCAGCCATGCCGCGTGAAGGCGAGTGC  
CCTACGGGCGTTAAACTTCTTTTGTGCGGGAGCAATAAGGGCCACGCGTGGCCCGATGAG  
AGTACCGCACGAATAAGCATCGGCTAACTCCGTG

>972 len=176 tot-seq=30

GAAGAGGGGGCATTCCCATCCAGTGGCCTCTCTTTTCTCAGTAAAGGAGAGGCAAGTTGG  
CCTACTGCCTGTGTCCCAGGGTCAGAAGGCTTGCCAAACCTATTCAGGGCCTGTTGCAG  
TGAGAGGCCTTGCAATTTACAGTAGCACCCTTTGGGGAAGTCCACCAGCAGCTC

>973 len=138 tot-seq=30

TGGGGGATATTGCACAATGGGCGCAAGCCTGATGCAGCAACGCCGCGTGAGGGAGGACGG

TCTTCGGATTGTAAACCTCTGTCCTTGGGGAAGAAACAAATGACGGTACCCTTGGAGGAA  
GCCACGGCTAACTACGTG

>974 len=154 tot-seq=30

TAGGGAATATTGGTCAATGGGTGAGAGCCTGAACCAGCCATGCCGCGTGCAGGAAGAAGG  
CCTTCTGGGTTGTAACTGCTTTTGCCAGGGGATAAAAATACCTTGCAGGTAATTGAA  
GGTACCTGGTGAATAAGCCACGGCTAACTACGTG

>975 len=159 tot-seq=30

TGGGGAATCTTGCGCAATGGGCGAAAGCCTGACGCAGCGACGCCGCGTGGGGGAAGAAGG  
CCTTCGGGTTGTAAACCTCTTTTCAGGAGGGACGAAGCCACTCGGGTGAATAGCCCAGAGG  
GTGACGGTACCTCCAGAAGAAGCCCCGGCTAACTACGTG

>976 len=138 tot-seq=30

TGGGGAATATTGGGCAATGGAGGCAACTCTGACCCAGCAACGCCGCGTGAAGGAAGAAGG  
CCTTCGGGTTGTAACTTTTGTGTAGAGGACGAAGAAAGTACTGTACTCTACGAGGAA  
GCCCCGGCTAACTATGTG

>977 len=156 tot-seq=30

TGGGGAATATTGCACAATGGGCGCAAGCCTGATGCAGCGACGCCGCGTGAAGGATGGAGG  
CCTTCGGGTTGTAAACCTCTTTTCGCCAGTGAAGCAGGCCATCTTCTTTGTGGGGTGGTTG  
ACGGTAGCTGGATAAGAAGCGCCGGCTAACTACGTG

>978 len=229 tot-seq=30

GGGGGGGGGAAGCAGGTGCTGAACAGACAGACCCAGGGCTTGGTGGGAGGTGCAAAATC  
CAACCCCAAACAGCAGACGGTGGCTTCTGGGGTCCCAGGATGGTAAATTCTGGATCAGG  
CTTTACCCTGGGCCTCAGGCAGAGAGCAGCAGGGAGGGGGATCTGGAGCAGGTAAGGCA  
CACCCAGGCCCTGGGCCAAAGGATTCTTGTGCATCAGCCTCTAACCTGT

>979 len=142 tot-seq=30

TAGGGAATCTTCGGCAATGGGGGCAACCCTGACGCAGCGACGCCGCGTGCGGGATGAAGG  
CCTTCGGGTTGTAAACCGCTTTTGATTGGGAGCAAGCTTTCGGGTGAGTGTACCTTTTGA  
ATAAGCGCCGGCTAACTACGTG

>980 len=160 tot-seq=30

TAGGGAATCTTCCACAATGGGCGAAAGCCTGATGGAGCAACGCCGCGTGGGTGAAGAAGG

TCTTCGGATCGTAAAACCTGTTGTTAGAGAAGAACACGAGTGAGAGTAACTGTTTCATTC  
GATGACGGTATCTAACCAAGCAAGTCACGGCTAACTACGTG

>981 len=160 tot-seq=30

TGGGGAATATTGCACAATGGGCGCAAGCCTGATGCAGCCATGCCGCGTGAATGAAGAAGG  
TTTTCGGATCGTAAAGCTCTGTTGTTGGTGAAGAAGGATAGAGGTAGTAACTGGCCTTTA  
TTTGACGGTAATCAACCAGAAAGTCACGGCTAACTACGTG

>982 len=160 tot-seq=30

TAGGGAATCTTCCGCAATGGACGAAAGTCTGACGGAGCAACGCCGCGTGAGCGAAGAAGG  
TCTTCGGATCGTAAAGCTCTGTTGTTAGGGAAGAACAAGTATCGGAGGAAATGCCGGTAC  
CTTGACGGTACCTGACGAGAAAGCCACGGCTAACTACGTG

>983 len=116 tot-seq=29

TTTGAAGAAAAGTTTGCCATTTGCGTTGACGGAAGGCCAAAAAACGTTATTAGCGAGATT  
ACGGAAGATATGCAAGGCGCGCAGGGCGAATCGCAAGCAACCGACGAATCGGAAGA

>984 len=116 tot-seq=29

AGGCTCAAGTGATGAGCTAACCTTGATAAGGTACACAATGCCGACTAGAAAATGCTATTT  
ATTCAGAAATGGTTTGAATCACTGTAGTTCTACTATCACACAACCTTTAAATAGTAG

>985 len=135 tot-seq=29

TAGGGAATATTGGGCAATGGAGGAACTCTGACCCAGCAACGCCGCGTGAAGGAAGAAGG  
TTTTCGGATTGTAACTTCTATCCTTGGTGAAGATAAGGACGGTAGCCAAGAAGGAAGCC  
CCGGATAACTACGTG

>986 len=139 tot-seq=29

TTCATGAGCCCCTCCACCCAGGTTCCATCCCTAGAGCCACTAAAAAGTTAAGACAAAGGA  
CGTGGAGAGAATCTTGATTGGGATAATCAAGCAAGCATAACAGCGTGCTTGGGATAATCAA  
GCAAGCATAACAGCGTGCTT

>987 len=153 tot-seq=29

TAGGGAATATTGCTCAATGGGGGAAACCTGAAGCAGCAACGCCGCGTGGAGGATGACAC  
TTTTCGGAGCGTAACTCCTTTTGTAGGGAAGAACAATGACGGTACCTAACGAATAAGC  
ACCGGCTAACTCCGTGGACCGGCTAACTCCGTG

>988 len=187 tot-seq=29

AATCAGCTCTGGGGGGGAAACACCTGTGCTTGTAAGTCTTGAAGTTTATGCAACCAG  
GAGAACTGTCCAACCTCAAGGCTTCAGGAAATATGCTGATATCTGGCCTGCTTCCATCAG  
TTTCATCTAATTGCTGGAAAATCATGTACCTAAGAAGGAGGTCCACTCCCCTCCTGC  
CCCACCC

>989 len=189 tot-seq=29

GGGCGAGACCGTGAAAGAACCATCCTGTGTGCTCAGCTGTGCACTTCCCTCACGTTCTTA  
CTCTGAGACCAAGCTTCTCCACTGTCCCTGGCCAGGCAAGAGCCCCACAATGGTCACCT  
GTCACCATCCAGGAAACATCTCATGAAAACCTGCTCAATTGTACCAAGAAAATACTCTG  
AGCCAACAT

>990 len=198 tot-seq=29

TAAGGAATCTTCCACAATGGGCGAAAGCCTGATGGAGCAACGCCGCGTGCAGGATGAAGG  
CCTTCGGGTTGTAAACTGCTTTTATAAGTGAGGAATATGACGGTAACTTATGAATAAGGA  
TCGGCTAACTACGTGCCAGCACCGCGTAATGCCAAGATCGGAAGAGCGTCGTGTAGGGA  
AAAGTGTGCCAATGTGTA

>991 len=161 tot-seq=29

TGGGGAATATTGGACAATGGGGGGAACCCTGATCCAGCCATGCCGCGTGTGTGAAGAAGG  
CCTTTTGGTTGTAAAGCACTTTAAGCGAGGAGGAGGCTTACCTGGTTAATACCTGGGATA  
AGTGGACGTTACTCGCAGAATAAGCACCGGCTAACTCTGTG

>992 len=160 tot-seq=29

TGGGGAATTTTGGACAATGGGCGAAAGCCTGATCCAGCAATGCCGCGTGCAGGATGAAGG  
CCTTCGGGTTGTAAACTGCTTTTGTACGGAACGAAAAGCTTCGGGTTAATACCCTGGAGT  
CATGACGGTACCGTAAGAATAAGCACCGGCTAACTACGTG

>993 len=158 tot-seq=29

TGGGGAATTTTGGACAATGGGGGCAACCCTGATCCAGCCATTCCGCGTGAGTGAAGAAGG  
CCTTCGGGTTGTAAAGCTCTTTCGGCAGGAACGAAACGGCGAGCTCTAACATAGCTCGCT  
AATGACGGTACCTGAAGAAGAAGCACCGGCTAACTACG

>994 len=160 tot-seq=29

TGGGGAATATTGCACAATGGGGGAAACCCTGATGCAGCCATGCCGCGTGTGTGAAGAAGG  
CCTTAGGGTTGTAAAGCACTTTCAGTCGGGAGGAAGGGGTCAGGTTAATACACTTGGTC

ATTGACGTTACTGACAGAAGAAGCACCGGCTAACTCCGTG

>995 len=208 tot-seq=29

AAGCTGTTAGCTGACATCCTCTGACGCACCGCATACTCAGGCACAACATGAGATGTGTTA  
CAGGAGCCCCACGGCCATCTGTACTTCAGGGAGATGAGGACAAGGAGGCATCTCCCGTGT  
CAAAACAACCCCTGATAAATATCTCTTAGGGGAAAATGGCTTGACGGGGCTGTACGGTGT  
CTCCCCTGACATGTAACCATCACTTCTC

>996 len=156 tot-seq=29

TGAGGAATATTGGTCAATGGGCGCAAGCCTGAACCAGCCAAGTCGCGTGAGGGAAGACGG  
CCCTACGGGTTGTAAACCTCTTTTGCCGGGGAGCAAGTGAGAGCACGCGTGCCCTTACGG  
AGAGTACCCGGAGAAAAAGCATCGGCTAACTCCGTG

>997 len=155 tot-seq=29

TGAGGAATATTGGTCAATGGACGGAAGTCTGAACCAGCCAAGTAGCGTGCAGGATGACGG  
CCCTATGGGTTGTAAACTGCTTTTATGCGGGGATAAAGTTAGTCACGTGTGACTATTTGC  
AGGTACCGCATGAATAAGGACCGGCTAATTCCGTG

>998 len=155 tot-seq=28

TGAGGAATATTGGTCAATGGGCGGTAGCCTGAACCAGCCAAGTAGCGTGAAGGATGAAGG  
TTCTATGGATTGTAAACTTCTTTTATAAAGGAATAAAGTGAGGCACGTGTGCCTTTTTGT  
ATGTACTTTATGAATAAGGATCGGCTAACTCCGTG

>999 len=161 tot-seq=28

TAGGGAATCTTCCACAATGGACGCAAGTCTGACGGAGCAACGCCGCGTGAGTGAAGACGG  
CCTTCGGGTTGTAAAGCTCTGTGATCCGGGACGAAAGAGCCTGAGGTTAATAGCCTGAGG  
AAGTGACGGTACCGGAAAAGCAAGCCACGGCTAACTACGTG

>1000 len=211 tot-seq=28

CACAAGGTTGGCCATGATCTGGTGAATACAGATTAGGCAGGAGAGCGGCCATGGAGAAAC  
AGACTGGTGAGGCTGCAGACGTTTGCTCATCTTTGTTTTGACGCCTCTTGCCCAAGCCT  
CAGCCTTCTCCTGCTTTCCTTGACCTTCTGCTGTTCCCTCATTGTCTTCTCCTGCTTT  
CCTTGACCTTCTGCTGTTCCCTCATTGTCT

>1001 len=216 tot-seq=28

AAGAAAGAATTCACAGTTACTTTAGTGGCTGTAGCAAGGAGAATCTTGAGCTGAAGGCCA

GCCTGAGCTATAGAGCAAGCATAAAGTCAATCTGGGTAATTTATGAGACCCTGTCTCAA  
ATGAAAAGTATAGAAGGGTTGGAGATAAAGCTCAGTAGTAGACTGCTTGCCTAGCATGGC  
ATTTGCAAGGATCCATGGCATATCCAGGTTCAATCC

>1002 len=223 tot-seq=28

TTCCGTAAGGCAGTGAGATTAGCACAGCTGGGCAGGAGAGGGATGGTTTTAGTCAGAACA  
GTGGCCCAGCAGCCCCAGCAGCCCCAGCAGCCCCAGCAGCCCCCAGCCCCAGCAGTCA  
TCTTGGCACCATTCCGTAAGGCAGTGAGATTAGCACAGCTGGGCAGGAGAGGGATGGTTT  
TAGTCAGAACAGTGGCCCAGCAGCCCCAGCAGCCCCAGCAGCC

>1003 len=166 tot-seq=28

TGGGAGAGGTGATATGGAAATTAGAATGAACCCCCCTCATCTGGTGATTGACGTTTTGGC  
CGAGCCTTGCTGTTGGAGGATGCACTAAGTAAATGACTTCTTGTGGTCACACTGAAATTC  
AAGATTCAGGATCGCAGAAAATGGAAGCTTTCCTGTGGTAACCAC

>1004 len=161 tot-seq=28

TAGGGAATCTCCGCAATGGACGAAAGTCTGACGGAGCAACGCCGCGTGAGTGATGAAGG  
CCTTCGGGTCGTAAAGCTCTGTTGTTAGGGAAGAACAAGTATTGTTCGAATAGGGCAGTA  
CCTTGACGGTACCTAACCAGAAAGCCACGGCTAACTACGTG

>1005 len=137 tot-seq=28

TGGGGAATATTGGGCAATGGGCGCAAGCCTGACCCAGCAATGCCGCGTGAAGGAAGAAGG  
CTTTCGGGTTGTAACTTCTTTGACAGGGGAAGAGCAGAAGACGGTACCCTGAAAACAAG  
CCACGGCTAACTACGTG

>1006 len=199 tot-seq=28

GACTCGGAAAGCGCTGAACACGAGAGGTAGAGGCAAGGAAGGGCTCCAAGGGCAGTGCCA  
GGGAGCGCTGATGCTCTGGAAGGAAAGAGAAGATGGGCTGGATGTTGGTCTTGTGCCAG  
AGACACTGAATGGAAAGACTGTGTAGGAGTCAGTATGTTTGGAGCTCAGATATCTGGGTT  
TCGGATGTACCTTAGGGAG

>1007 len=160 tot-seq=28

TAGGGAATATTGCACAATGGAGGAAACCCTGATGCAGCCACGCCGCGTGGGTGAAGAAGG  
TCTTCGGATCGTAAAACCCTGTTGTTAGAGAAGAAAGTGCGTGAGAGTAACTGTTACGT  
TTCGACGGTATCTAACCAGAAAGCCACGGCTAACTACGTG

>1008 len=140 tot-seq=28

TGGGGAATATTGCACAATGGACGCAAGTCTGATGCAGCAACGCCGCGTGCGGGATGACGG  
CCTTCGGGTTGTAAACCGCTTTCAGCAGGGACGAAGCGAAAAGTGACGGTACCTGCAGAAG  
AAGCACCGGCTAACTACGTG

>1009 len=160 tot-seq=28

TAGGGAATCTTCGGCAATGGGGGAAACCCTGACCGAGCAACGCCGCGTGAGTGATGAAGG  
TCTTCGGATCGTAAACTCTGTTATTAGGGAAGAACATATGTGTAAGTAACTGTGCACAT  
CTTGACGGTACCTAATCAGAAAGCCACGGCTAACTACGTG

>1010 len=155 tot-seq=28

TGAGGAATATTGGTCAATGGGCGAGAGCCTGAACCAGCCAAGTAGCGTGCAGGAAGACGG  
CCCTATGGGTTGTAAACTGCTTTTATGCGGGGATAAAGCGGGCGACGTGTCGCCCTTTC  
AGGTACCGCATGAATAAGGACCGGCTAATTCCGTG

>1011 len=154 tot-seq=28

TGGGGGATATTGCACAATGGGCGCAAGCCTGATGCAGCGACGCCGCGTGGGGGATGACGG  
CCTTCGGGTTGTAAACCTCTTTCGTCGGGGACAAGGCTCTGCTTGGTGGTGGGGTTGAG  
GGTACCCGGTGAAGAAGCGCCGGCTAACTACGTG

>1012 len=157 tot-seq=28

TGAGGAATATTGGTCAATGGCCGAGAGGCTGAACCAGCCAAGTAGCGTGCAGGATGACGG  
CCCTCGTGGTTGTAAACTGCTTTTAGTCGGGAATAAAAGGGGGTTCGTGAACCCCGTATT  
GTATGTACCGTCAGAAAAGGACCGGCTAATTCCGTG

>1013 len=211 tot-seq=28

TATGACCTTGCCTAGCTCTTTGAGGTCCCAATCCCCTGGGTCAGGAAAAGATCATCCC  
TGAGAAAACAGAGGTCCTCATGGTTGACCATGCTGCAACTTGGAATGAGGCTCCTTGC  
AGGACAGAGGGGGCAGCACATTAGGCCTGGATCCCAAAGTGCAGAGATTCCTTTTGGGAA  
AGTTTAGGGCCAGATCCAGATGTGTGGTTCT

>1014 len=151 tot-seq=28

TGGGGAATATTGCACAATGGGGGAAACCCTGATGCAGCGACGCCGCGTGAGTGAAGAAGT  
ATTCGGTATGTAAAGCTCTATCAGCAGGGAAGAAAGGTGCCCTTGGGCGCCTGGACGG  
TACCTGACTAAGAAGCCCCGGCTAACTACGT

>1015 len=142 tot-seq=28

TGGGGAATCTTGCGAATGGGCGCAACCCTGACGCAGCGACGCCGCGTGCGGGATGAAGG  
CCTTCGGGTTGTAAACCGCTTTTGATTGGGAGCAAGCTTTCGGGTGGGTGTACCTTTCGA  
ATAAGCGCCGGCTAACTACGTG

>1016 len=135 tot-seq=28

CTAGGCAGAATGGAGGGGGCGGGGCTTCTCTCATACCTCAGGGCTACTGAGGTCTCCT  
GAGGGTGATTCATTTCTAGCTGCCACTGGAAGCAGAGTTCGCAGCCACAAAGCACTCAAT  
TCTACTAAGAAATAT

>1017 len=160 tot-seq=28

TGGGGAATTTTGGACAATGGGGGCAACCCTGATCCAGCCATGCCGCGTGCGGGAAGAAGG  
CCTTCGGGTTGTAAACCGCTTTTGTTTCGGGAAGAAATCCTCTGGGCTAATACCCCGGGGG  
GATGACGGTACCGGAAGAATAAGCACCGGCTAACTACGTG

>1018 len=155 tot-seq=28

TGAGGAATATTGGTCAATGGGCGAGAGCCTGAACCAGCCAAGTAGCGTGACAGGACGACGG  
CCCTATGGGTTGTAAACTGCTTTTATGCGGGGATAAAGTGAGTCACGTGTGACTTATTGC  
AGGTACCGCATGAATAAGGACCGGCTAATTCCGTG

>1019 len=129 tot-seq=27

TGGACAATGGGGGCAACCCTGATCCAGCCATGCCGCGTGAGTGACTTGAAGGCCTTAGGG  
TCGTAAAGCTCTTTCGGCGGGGAAGATAATGACGGTACCCGCAGAAGAAGCCCCGGCTAA  
CTTCGTGTG

>1020 len=133 tot-seq=27

GGGCAAGTCAGGATCTTCAACTTTGCACGTGGTTTGCAGACCCTTCCTCCTCCTGACAA  
AGACCCCTCCTACCCAGGCCAGGATATTCCACATCAGGGCAGAGGGAGGAGCATCCAC  
GCCAGGTCAGAC

>1021 len=135 tot-seq=27

TGGGGAATATTGGACAATGGGGGAAACCCTGATCCAGCCATGCCGCGTGAGTGATGAAGG  
CCTTAGGGTTGTAAAGCTCTTTCGTCAGGGAAGATAATGACGGTACCTGAAGAAGAAGCC  
CCGGCTAACTTCGTG

>1022 len=138 tot-seq=27



TGGGGAATATTGCACAATGGGGGGAACCCTGATGCAGCGACGCCGCGTGAGTGAAGAAGT  
ATCTCGGTATGTAAAGCTCTGTCAGCAGGGAAGAAGAAAGACGGTACCTGACCAAGAAGC  
CCCGGCTAACTACGTGTG

>1023 len=155 tot-seq=27

TGAGGAATATTGGTCAATGGATGGAAATCTGAACCAGCCAAGTAGCGTGCAGGATGACGG  
CCCTATGGGTTGTAAACTGCTTTTATGTGAGAATAAAGTTAGGTATGTATACTTATTTGC  
ATGTATCACATGAATAAGGACCGGCTAATTCCGTG

>1024 len=156 tot-seq=27

TGAGGAATATTGGTCAATGGGCGCGAGCCTGAACCAGCCAAGTAGCGTGGAGGACGACGG  
CCCTACGGGTTGTAAACTCCTTTTGC GCGGGGATAAAGTGCGCGACGTGCTCGCGCATTG  
CAGGTACCGCGGAACAAGGACCGGCAATTCCGTG

>1025 len=160 tot-seq=27

TAGGGAATCTCCACAATGGACGAAAGTCTGATGGAGCAATGCCGCGTGAGTGAAGAAGG  
TTTTCGGATCGTAAACTCTGTTGTGAGGGAAGAACAAGTATGAGAGTAACTGCTCGTAC  
CTTGACGGTACCTCATTAGAAAGCCACGGCTAACTACGTG

>1026 len=161 tot-seq=27

TGGGGAATATTGCGCAATGGGGGAAACCCTGACGCAGCGACGCCGCGTGAGTGATGACGG  
CCTTCGGGTTGTAAAGCTCTGTTAATCGGGACGAATGGTCTTTGTGTGAATAATGCAAAG  
ATTTGACGGTACCGGAATAGAAAGCCACGGCTAACTACGTG

>1027 len=224 tot-seq=27

CCAAGCCACATCCTCCCCGACAATCAGCGAGGCACACAGGCTTTCTGCATCCTGGCCTCC  
TTGTCCAGAGTGGTATCGATCATGTCAGACACTGAAAATACCACCCTTAGGTCATGCATC  
CGTCCCTCCCCATGCCACCTCCACAGAGGGACTGCATCCCAGAGACCAGCCACGTCTCT  
GCAATGTGCACCTAAACCTTCACCTGTGCACCTAAACCTTCACC

>1028 len=135 tot-seq=27

TGGGGAATATTGCACAATGGAGGAAACTCTGATGCAGCAACGCCGCGTGAATGATGAAGG  
CCTTCGGGTCGTAAAGTTCTTTGATTGGGACGATAATGACGGTACCCAAAAACAAGCC  
ACGGCTAACTACGTG

>1029 len=135 tot-seq=27

TGAGGGATATTCGGCAATGGGGGAAACCCTGACCGAGCAACGCCGCGTGAGGGAAGACGG  
TTTTCGGATTGTAAACCTCTGTCCTCTGTGAAGATAATGACGGTAACAGAGGAGGAAGCT  
CCGGCTAACTACGTG

>1030 len=120 tot-seq=27

TAGGTTCCCCAGGGAGAAGGGAAAGTTCGGCAAAGCCACCCTCAGCAACTCTGGAATGAG  
ATATTCCCCCTCCAGATTGCCACAGCTGTCCGCAGCAATTGCCTTAGTCGGGGGCATCAG

>1031 len=168 tot-seq=27

GGGACCACAGATGCTAACAGCCGGCCATTCAGGGTTACCCTGGCCAGAATTCTCCCTTA  
AGCCTCAGCTTCCAGAGCTACAAATCAGAGCTAAATAAACCCCTCCTTCCACTGGGGGTGG  
CGGAGGTCACGTGTGTGTGTGCACGCATGTGTGAACGTGTGTTCAGAGA

>1032 len=155 tot-seq=27

GGCAGGGAAGGTCACCCCCATTTGCAGGTGGTAAAACCGAGGCTCAGGGGGTGACATTT  
CTCAGCTATAGGAGCCAGGGATGAGCTTCCGGCTCAGGGCTTGAGATAGAGGAGAAGCCC  
CCAGGTGAGGGCTGTCCTGAACCTACCAAGGGCCA

>1033 len=155 tot-seq=27

TGAGGAATATTGGTCAATGGGCGGGAGCCTGAACCAGCCAAGTCGCGTGAGGGATGACGG  
TCCTACGGATTGTAAACCTCTTTAGCCGGGGAGTAACGTGTCCCACGCGTGGGGCAGTGA  
GAGTACCCGGAGAATAAGCATCGGCTAACTCCGTG

>1034 len=135 tot-seq=27

TGGGGGATATTGCACAATGGGGGAAACCCTGATGCAGCGACGCCGCGTGAGTGAAGAAGT  
TATTCGTAATGTAAAGCTCTATCAGCAGGGAAGAAAGTGACAGTACCTGACTAAGAAGCC  
CCGGCTAACTACGTG

>1035 len=150 tot-seq=27

TGGGGGATATTGCACAATGGGCGAAAGCCTGATGCAGCGACGCCGCGTGGGGGATGAAGG  
CCTTCGGGTTGTAAACTTCTTTTGCTCTGAACAAGGCGCACCGTGGGGTGTGTTGAGTGT  
AGGGGTTGATTAGCGCCGGCTAACTACGTG

>1036 len=160 tot-seq=27

TGGGGAATCTTCGCAATGGACGAAAGTCTGACGGAGCAACGCCGCGTGAGTGAAGACGG  
CCTTCGGGTTGTAAAGTACTTTTCAGCGGGGAGGAAGGGAGTAAAGTTAATACCTTTGCTC

ATTGACGTTACCCGCAGAAGAAGCACCGGCTAACTCCGTG

>1037 len=103 tot-seq=27

CAGGGGGAGAAGGTGAAATAAAGTGCCAGCTCATGACTGCAGAGTCCCTTGCTTATTCT  
GCATTCACCTCTCTATTCTCACCATGTCATACCGGGACCATA

>1038 len=134 tot-seq=26

GCAGTAGCAGGATACTCAGTCACTCAGCAAAGACAAAGACCCACTGGCCTGCCACGCTC  
TCCTTGTTCCCTCCCACTTCTTCCCATCTGTTTGACAGTCGAGGATCCCTCCCCTAGTCA  
AGCCTGTTCTCATC

>1039 len=135 tot-seq=26

TGGGGAATATTGCACAATGGGGGAAACCCTGATGCAGCAACGCCGCGTGAAGGAAGACGG  
TCTTCGGATTGTAACTTTTGTCTTAGTGAAGATAGTGACGGTAGCTAAGGAGAAAGCC  
ACGGCTAACTACGTG

>1040 len=155 tot-seq=26

TGAGGAATATTGGTCAATGGGCGCAAGCCTGAACCAGCCAAGTAGCGTGAAGGAAGACTG  
CCCTATGGGTTGTAACTTCTTTTATACGGGAACAAACGATAGTACGCGTACTATTTTGC  
GTGTACCGTATGAATAAGCATCGGCTAACTCCGTG

>1041 len=156 tot-seq=26

TGGGGGATATTGCACAATGGGGGAAACCCTGATGCAGCGACGCCGCGTGAGTGAAGGAGC  
GTTTCGGCGCGTAAAGCTCTATCAGCAGGGAAGACAAACTGCCCGGAAGGGGCAGCCGG  
ACGGTACCTGACCAAGAAGCCCCGGCTAACTACGTG

>1042 len=160 tot-seq=26

TAGGGAATCTCCGCAATGGGCGAAAGCCTGACGGAGCAACGCCGCGTGTGCGAAGAAGG  
TCTTCGGATCGTAAAGCACTGTTGTTAAGGAAGAACGACAGTAAGAGTAACTGCTTACTG  
TGTGACGGTACTTAACCAGAAAGCCACGGCTAACTACGTG

>1043 len=160 tot-seq=26

TGGGGAATTTTGGACAATGGGCGCAAGCCTGATCCAGCCATGCCGCGTGAGTGAAGAAGG  
CCTTCGGGTTGTAAAGCTCTTTCAGCCGAAAGAAATTGCACTTATTAATACTAAGTGTA  
GATGACGGTACCGGAAGAAGAAGCACCGGCTAACTACGTG

>1044 len=225 tot-seq=26

CTCTAGCTAGCTATTATATTTGTGATCTTCTTGGACTGGCCCCACACCAGTACTGGAACC  
TTGCATACGTGCATGGGCCAGAATAACCCAGACAAGGAAGTGGGTTCTGGAAGCATTTTC  
TGGGAGGCCACCTGCTATGTGGTGAAGGAAAGTTGTCCTTGGGCACAAAGGCCCAATTT  
AAACAAACAGAAGTTCCGAGATGAAGGGGCCCTGCCCTGAACTTC

>1045 len=232 tot-seq=26

GTGTGAGGGGACTCCATGCATTCCACGTGGCTCTGCACCTGACACTTAATGTCCCTTAGA  
GAACTAAGGCCAGGCGGGCGGGCGGACAGAGGGCACGCACCATCCCATAGAGCAGGT  
CCAGGGCCCGCAGCCGGATGGACTCGTCCTTGTCTGCCAGGCACTGCAGGATGAGGTCTT  
TGTGGGACTGCACGGACTTGGGGTGGGTCTTCAGGATCTTGGACATTGATTG

>1046 len=159 tot-seq=26

TGGGGAATTTTGGACAATGGGCGAAAGCCTGATCCAGCCATTCCGCGTGAGTGAAGAAGG  
CCTTCGGGTTGTAAAGCTCTTTCGCAAGGGAAGAAACGATGCAGTCGAATAAACTGTGTT  
AATGACGGTACCTTGATAAGAAGCACCGGCTAACTACGT

>1047 len=182 tot-seq=26

AGCATTTGCTATTACTACATCTTCTACAATACCTAAACGTCTGGCTCCCTCTTTTATTT  
TGTACATGAGGACATGGAGAAGGAGAGTTTCAAGGTCTGTCTGCTGCCTGGCCTGGCGGG  
GATCCTTCCTTGCCAGCACCCCCTGTTCTCCAGGGCAGCTCTGTGCTGAGTCAGCACCC  
AC

>1048 len=135 tot-seq=26

TGGGGGATATTGGACAATGGGGGAAACCCTTATCCAGCGACGCCGCGTGAGGGAAGAAGG  
TTTTCGGATTGTAAACCTCTGTCAGCGGGGACGATAATGACGGTACCCGCGGAGGAAGCC  
ACGGCTAACTACGTG

>1049 len=160 tot-seq=26

TGGGGAATTTTGGACAATGGGGGCAACCCTGATCCAGCCATGCCGCGTGCAGGATGAAGG  
TCTTCGGATTGTAAACTGCTTTTGTGAGGGAAGAAAAGTTTAGAGCGAATAACTCTGAAT  
GCTGACGGTACCTGAAGAATAAGCACCGGCTAACTACGTG

>1050 len=155 tot-seq=26

TGGGGAATATTGCACAATGGGCGAAAGCCTGAACCAGCCAAGTAGCGTGCAGGAAGACGG  
CCCTATGGGTTGTAAACTGCTTTTATGCGGGGATAAAGGAGTCCACGTGTGGGCTTTTGC

AGGTATCGCATGAATAAGGACCGGCTAATTCCGTG

>1051 len=160 tot-seq=26

TGGGGAATATTGCGCAATGGGCGCAAGCCTGATGGAGCAACACCGCGTGAGTGAAGAAGG  
GTTTCGGCTCGTAAAGCTCTGTTGTTGGAGAAGAACGTGCGTGAGAGTAACTGTTACGCG  
AGTGACGGTATCCAACCAGAAAGTCACGGCTAACTACGTG

>1052 len=135 tot-seq=26

TGGGGAATATTGGACAATGGGGGGAACCCTGATCCAGCGACGCCGCGTGAGTGAAGAAGT  
ATTTCCGGTATGTAAAGCTCTATCAGCAGGGAAGAAAATGACGGTACCTGACTAAGAAGCC  
CCGGCTAACTACGTG

>1053 len=136 tot-seq=26

TGGGGAATATTGCACAATGGGGGGGACCCTGATGCAGCGACGCCGCGTGGGTGAAGGAGT  
ATTTCCGGTATGTAAAGCCCTATCAGCAGGGAAGAACAATGACGGTACCTGACTAAGAAGC  
ACCGGCTAAATACGTG

>1054 len=160 tot-seq=26

TGGGGAATTTTGGACAATGGGCGCAAGCCTGATCCAGCCATGCCGCGTGTCTGAAGAAGG  
CCTTCGGGTTGTAAAGGACTTTTGTGAGGGAAGAAAAGGCCGTTGCCAATATCGGCGGCC  
GATGACGGTACCTGAAGAATAAGCACCGGCTAACTACGTG

>1055 len=161 tot-seq=26

TGGGGAATATTGCGCAATGGGGGAAACCCTGACGCAGCGACGCCGCGTGCGGGATGAAGG  
CCTTCGGGTTGTAAAGCTCTGTTGTAAGAGAAGAACGTGTGTGAGAGTGGAAAGTTCACA  
CAGTGACGGTAACTTACCAGAAAGGGACGGCTAACTACGTG

>1056 len=135 tot-seq=26

TGGGGAATATTGGACAATGGGCGCAAGCCTGATCCAGCCATGCCGCGTGAGTGATGAAGG  
CCTTAGGGTTGTAAAGCTCTTTCGTCGGGGAAGATAATGACGGTACCCGAAGAAGAAGCC  
TCGGCTAACTCCGTG

>1057 len=145 tot-seq=26

TGGGGGATATTGGACAATGGGGGAAACCCTGATCCAGCGACGCCGCGTGAGTGAAGAAGT  
ATTTCCGGTATGTAAAGCTCTATCAGCAGGGAAGAAAAATAACCAAATTGACTGTACCTGA  
CTAAGAAGCCCCGGCTAACTACGTG

>1058 len=172 tot-seq=26

GGAGCTCAACCACCAAGCGGGGAGCGAGAGAGGAGAGAGCACATGTGGTCACGAGGCTTT  
CATTAAAGGCCCATAGCCTTCTGAGGGGGTTGTGAATTGTCTGGTTAAAGAAAACACA  
GATGAAGGGGGAACCTATTA ACTCTGGTGTGGGCCATTAGGTCTTATCATGG

>1059 len=101 tot-seq=25

CTTAGGGTCCCCTCCCTCTCTGTACCTGGAGAAGTGGTAGTCTTCACAGACCCTCTCGGG  
AGCCCCACCCCAAATCTGCCTAGAGAATCGCATGGAGAGC

>1060 len=137 tot-seq=25

TGGGGAATATTGCGCAATGGGGGAAACCCTGACGCAGCAACGCCGCGTGATTGAAGAAGG  
TCTTCGGATTGTA AAAATCTTTTATCAAGGACGAAGAAGTGACGGTACTTGATGAATAAG  
CTCCGGCTAACTACGTG

>1061 len=156 tot-seq=25

TGAGGAATATTGGACAATGGGTTAGCGCCTGATCCAGCCATCCCGCGTGCAGGATGACGG  
CCTTATGGGTTGTAAACTGCTTTTATATGTGAATAAACCTATCCACGAGTTGGATAGTTG  
AAGGTAGCATATGAATAAGCACCGGCTAACTCCGTG

>1062 len=160 tot-seq=25

TAGGGAATCTCCACAATGGACGAAAGTCTGATGGAGCAACGCCGCGTGAGTGAAGAAGG  
TTTTCGGATCGTAAACTCTGTTGTCAGAGAAGAACGTGTGCGAGAGTAACTGTTCTGTGC  
AGTGACGGTATCTGGCCAGAAAGCCACGGCTAACTACGTG

>1063 len=161 tot-seq=25

TGGGGAATATTGCACAATGGGGGAAACCCTGATGCAGCAACGCCGCGTGAGTGATGAAGG  
CCTTCGGGTTGTAAAGTACTTTTACGCGGGGAGGAAGGGAGTAAAGTTAATACCTTTGCTC  
ATTGACGTTACCCGCAGAAGAAGCACCGGCTAACTCCGTGG

>1064 len=165 tot-seq=25

TAGGGAATCTCCACAATGGACGCAAGTCTGATGGAGCAACGCCGCGTGAACGATGAAGG  
TCTTATAGATTGTAAAGTTCTTTTATATGGGAAGAAACGCTAAGATAGGAAATGATTTTA  
GTTTGACTGTACCATTTGAATAAGTATCGGCTAACTATGTGTGTG

>1065 len=171 tot-seq=25

GAGTACCGGAAGAGGCCACCTTACCTTTCTTGCTGCCAATAACTTGGTGAAAGGAAGAGA

GCTGATAGAGCTACCTGCCATAGACTTTGAATACATCTTCCTTGCCAATAACTTGGTGAA  
AGGAAGAGAGCTGATAGAGCTACCTGCCATAGACTTTGAATACATCTTCCC

>1066 len=191 tot-seq=25

GGAGAGGGAGCCCAGAGAGAGTACACAGAGAGAGGAGAGACATAAACAGCTCGCAGGACC  
AAGAAAAAGCAGCCTGCACTCTACAGGGACCAAAGGCAGCAAAACCTCTAACTTAATTT  
TTTATAGTCCCCTGCTAACTACAGCAGAGGTGACACTTAAGAAAATGAGCCCTCTCCGTT  
CTTCCAGGAG

>1067 len=216 tot-seq=25

TGAGGAATATTGGTCAATGGGCGGAGCCTGAACCAGCCAAGTCGCGTGAGGGATGAAGG  
ATCTATGGTTCGTAAACCTCTTTTATAAGGGAATAAAGTGCGGGACGCGTCCCGCTTCGC  
ATGTACCTTATGAATAAGGATCGGCTAACTCCGTGCCAGCAGCGCGGTAATCTATAGATC  
GGAAGAGCGTCGTGTAGGGAAAGTGAGGAATATTGG

>1068 len=218 tot-seq=25

CCCTACAGTAGGACACAGAAGCAGCAGACAGCTCCCCACCTTTGGACCCCTGATCTTCTT  
TGTCTCATTCTCAAGGACTTTTGTCTAAGGAGGACCCACAATGTGTATGCTTGCATACC  
TGAGTGTGTATGTGTATGTGCACGCATACGCAAGTGTGCATATGTGTACTTACCATGT  
CCACGTGCCTCTCTGATGTTCTTACATTTGGTTAAATT

>1069 len=225 tot-seq=25

TGGAAGTTTGTAAAGAATAGCTGTGGCGTTGCCCTCTATTCCACGACTGTTCTCAGGCC  
TACTTGTGTATTTTTACCCAGTATCACTTATTTTTAAATGACAGAAGTTTGGAGCTTCTC  
AGGCAATGTGATTTTCTGTGGCCTAAACTGCCTTAGGTAAAGCATCGAGACTAACCCAA  
AAGGCTATTGCTGGGTCTCTCGGCTCCCTTCTTATTATCTATCA

>1070 len=190 tot-seq=25

ACAGCGTGAAGAGCCTCAGGTGATCGGTGACCAAGCGCAGGTAGAGCGGCCGGCCTGATT  
CCCGCTTACCAGCAGCAGTCGCATCTGGCAAGACTCAGGACTCAGGGTGGGGTCCAGGA  
GGGCTGCCCGCAGCCAGCCCTCTGCCCCAGCACCAGCCCCTCTGCCAGGCAGCTCCTCCT  
CTGAGAGTCC

>1071 len=154 tot-seq=25

TGAGGAATATTGGTCAATGGGCGGAGAGCCTGAACCAGCCAAGTCGCGTGAAGGAAGAAGG

TTCTATGGATTGTAACTTCTTTTGTAAAGGGAATAAAAAGAGTTACGTGTAACCTATTGT  
ATGTACTTTACGAATAAGGATCGGCTAACTCCGT

>1072 len=161 tot-seq=25

TAGGGAATCTTCCACAATGGACGCAAGTCTGATGGAGCAACGCCGCGTGAGTGATGACGG  
TCTTCGGATTGTAAAGCTCTGTTAATCGGGACGAATGGTCGGTGTGCAAATAGTGCATGG  
ACATGACGGTACCGGAATAGAAAGCCACGGCTAACTACGTG

>1073 len=144 tot-seq=25

GATACCCCAACACCTCAGTTCATCCTCAGGGCCACAGAAGCCCTCAGGGGTGTAGTCAA  
TGGTGACTTTATTCTTATTTTTCTGGGAGGAGTAACGCCTGTGTGGGGCAGGCCTGCTCC  
TTCAGCCCGCGTGGCTTACTCCTT

>1074 len=155 tot-seq=25

TGAGGAATATTGGTCAATGGACGAGAGTCTGAACCAGCCAAATCGCGTGAAGGAAGACAG  
CCCTACGGGTTTTAACTTCTTTTATAGGGGAATAAAAAAGAGAACGAGTTCTCTATTGC  
ATGTACCCTATGAATAAGCATCGGCTAACTCCGTG

>1075 len=184 tot-seq=25

GGTAAACCATGAGAACTGGGGGTGGAGGACTACTCTATGAGGAGTCAGAAAGGAAATGGA  
GTGATGGGAGGAGAGGAGGCAGAGGGTGGCGTCGTTGCTTCTTGCTTACCCTCCCTGCA  
ACATATCCTATGTAAATGTTCAAGTCCCCAAAAATGTACATACAGCTTATGAAAAGCAGG  
ACAG

>1076 len=142 tot-seq=25

TGGGGAATATTGCACAATGGACGGAAGTTTGATGCAGCGACGCCGCGTGCGGGATGAAGG  
CCTTCGGGTTGTAAACCGCTTTTGATTGGGAGCAAGCCTTCGGGTGAGTGTACCTTTCGA  
ATAAGCGCCGGCTAACTACGTG

>1077 len=114 tot-seq=25

TAGGGAATCTTCCACAATGGACGCAAGCCTGATGGAGCAACGCCGCGTGAGTGAAGAAGG  
GTTTCGGCTCGTAAAGCTCTGTTGTTGGTGAAGAAGGAGAGGGGGAGTAACTGA

>1078 len=232 tot-seq=25

TAGGGAATTTTTACAATGGGCGCAAGCCTTATGAAGCAATGCCGCGTGAACGATGAAGG  
TCTTATAGATTGTAAAGTTCTTTTATATGGGAAGAAACGCTAAAATAGGAAATGATTTTA



GTTTGACTGTACCATTTGAATAAGTATCGGCTAACTATGTGCCAGCAGCCGCGTAATTT  
CAGATCGGAAGAGCGTCGTGTAGGGAAAGAGGGGGGGGGTGTGTAGATCTAG

>1079 len=135 tot-seq=25

TGGGGAATATTGCACAATGGGCGAAAGCCTGATGCAGCGACGCCGCGTGAGCGAAGAAGG  
CTTTCGAGTCGTAAAGCTCTGTCCTATGAGAAGATAATGACGGTATCATAGGAGGAAGCC  
CTGGCTAAATACGTG

>1080 len=160 tot-seq=25

TGAGGAATATTGGTCAATGGACGCAAGTCTGACGGAGCAACGCCGCGTGAGTGAAGAAGG  
ATTCGGTTCGTAAACTCTGTTGTTAGAGAAGAAGCAGCGCATAGAGTAACTGTTATGCG  
TGTGACGGTATCTAACCAGAAAGCCACGGCTAACTACGTG

>1081 len=160 tot-seq=25

TGGGGAATATTGGACAATGGGCGCAAGCCTGATCCAGCCATGCCGCGTGTGTGAAGAAGG  
CCTTCGGGTTGTAAAGTACTTTTCAGCGGGGAGGAAGGGAGTAAAGTTAATACCTTTGCTC  
ATTGACGTTACCCGCAGAAGAAGCACCGGCTAACTCCGTG

>1082 len=105 tot-seq=24

AATACATGAAAGAGGGCTCACAGAGCACTGGCCGGGCCCGGCACCCCATGGCGTCTGCAG  
ATGGCCGCTGCCCTCACCTCCTTCCCTTCATCTCCAGGGTGGGC

>1083 len=113 tot-seq=24

CTGGTCCTGGGAGACCCGAAGCTTCTCCCTGGATGTTTAGGGAGTGAGCTGCCTGTAGGG  
TCCCATGTACTGGTGGCCACATGTCCATATCCCTCTTGTCCCTGTCCAGAC

>1084 len=135 tot-seq=24

TGGGGAATTTTGCACAATGGAGGGAAGTCTGATGCAGCGACGCCGCGTGAACGAAGAAGG  
TTTTGAATCGTAAAGTTCTGTCCTGGGTGAAGATAATGACGGTAATCCAGGAGGAAGCC  
CCGGCTAACTACGTG

>1085 len=138 tot-seq=24

TGGGGAATATTGGGCAATGGGCGCAAGCCTGACCCAGCAATGCCGCGTGAAGGAAGAAGG  
CCCTCGGGTTGTAAACTTCTTTATCAGGGACGAAGGATGTGACGGTACCTGATGAATAA  
GCTCCGGCTAACTACGTG

>1086 len=160 tot-seq=24

TAAGGAATTTTCGGCAATGGAGGAACTCTGACCGAGCAACGCCGCGTGAGTGATGAAGG  
CCTTAGGGTTGTAAAGCTCTGTTACGAGGGAAGAACTACTCACTAGGAAATGAGTGAGT  
ACCGACGGTACCTCGCCAGAAAGTCACGGCTTACTACGTG

>1087 len=181 tot-seq=24

TGGGGAATTTTACGCAATGGGCGAAAGCCTGACGTAGCGACACCGCGTGAGCGAAGAAGC  
CCTTTGGGGTGTAAAGCTCTGTCAGCAGGGACGAAATAAATGACGGTACCTGCAGAGGAA  
GCATCGGCTAACTACGTGCCAGCAGCGCGTAATAGCAGATCGGAAGAGCGTCGTGTATG  
G

>1088 len=230 tot-seq=24

GCTAAGCAGTTCATTGACGTCATGGTGAATCCGAAATCACTCATAGTTTTAGCTCTGAG  
GCACGAACATCACAATATGTTCTCCTATAGGTAAGAAGACAGCTATTCATAAAATTCAA  
CTGTAGAAATAAAAAACATTTTTTAAACACTCAAGACTGGCCAATGTCAGGCTTTGACA  
AACCAAGTTATCACCTGGCCTGCCTGGCCTAGGGCCCCTCCCCAACAGC

>1089 len=237 tot-seq=24

GAGAGCTGTTGGACAGTTTTAATGGGAGAGTTGCATGATCATGTCTGATTTTTAAGGAAG  
ACTGTAACAGCAGACATGGATTGGAGGGAGAAGAGGGGCAATCATCTTTCATCTAAAAG  
CCCCTCCAGGAAAGTCTAGAATCTTTGCACAGAAGCTTTTTGAGATAATTAAGCCCCACT  
GGTGAATTGGAGCAAACAGTTTCAGCTTTGCAGTGAGCCAGCAGTAGTAGCTTTTGG

>1090 len=160 tot-seq=24

TGGGGAATTTTGGACAATGGGGGCAACCCTGATCCAGCAATGCCGCGTGAGTGAAGAAGG  
CCCTCGGGTTGTAAAGCTCTTTTGTGAGGGAAGAAACGGTGAATCCTAATACGGTTTGCT  
AATGACGGTACCTGAAGAATAAGCACCGGCTAACTACGTG

>1091 len=135 tot-seq=24

TGGGGGATATTGCGCAATGGGGGAAACCCTGACGCAGCAACGCCGCGTGAAGGATGAAGG  
TTTTCGGATTGTAAACTTCTTTATTTAGGACGAATTATGACGGTACTAAATGAATAAGC  
TCCGGCTAACTACGT

>1092 len=159 tot-seq=24

TGGGGAATTGTTTCGCAATGGGCGCAAGCCTGACGACGCAACGCCGCGTGGAGGATGAAGG  
TCTTCGGATTGTAAACTCCTGTTGCTCGGGAAGAATGGCTCCGACCTAACACGTCGGAGT

GTGACGGTACCGGGTGAGGAAGCCCCGGCTAACTCTGTG

>1093 len=149 tot-seq=24

TGGGGAATATTGCACAATGGGCGCAAGCCTGATGCAGCGACGCCGCGTGGGGGATGGAAG  
GCCTTCGGGTTGTAAACTCCTTTCGCCCGGGACGAAGCCCACCTGGTGGGTGACGGTACC  
GTGGAGAAGAAGCACCGGCTAACTACGTG

>1094 len=154 tot-seq=24

TGAGGAATATTGGTCAATGGGCGGAAGCCTGAACCAGCCAAGTCGCGTGAGGGAAGACGG  
CCCTAAGGGTTGTAAACCTCTTTTCCCGGGGAGCAAAGCGCCGTGCGCGGTGCTATGAG  
AGTACCCGGAGAAAAAGCATCGGCTAACTCCGTG

>1095 len=135 tot-seq=24

TGGGGAATCTTGACAATGGGCGAAAGCCTGATCCAGCCATGCCGCGTGGATGATGAAGG  
CCCTAGGGTTGTAAATCCTTTCGTTGGGGACGATAATGACGGTACCCAAAGAAGAAGCT  
CCGGCTAACTTCGTG

>1096 len=161 tot-seq=24

TGAGGAATATTGGTCAATGGACGAAAGTCTGACGGAGCAACGCCGCGTGAGTGATGACGG  
TCTTCGATTGTAAAGCTCTGTTAATCGGGACGAATGGTCGGTGTGCAAATAGTGCATGG  
ACATGACGGTACCGGAATAGAAAGCCACGGCTAACTACGTG

>1097 len=142 tot-seq=24

TGGGGAATATTGCACAATGGACGGAAGTTTGGATGCAGCGACGCCGCGTGCGGGATGAAGG  
CCTTCGGGTTGTAAACCGCTTTCAGCAGGGACGAGGCCGCAAGGTGACGGTACCTGCAGA  
AGAAGCCCCGGCTAACTACGTG

>1098 len=136 tot-seq=23

TGGGGAATATTGCACAATGGGGGGAACCCTGATGCAGCGACGCCGCGTGAGTGACGAAGT  
ATCTCGGTATGTAAAGCTCTGTCAGCAGGGAAGAAGAATGACGGTACCTGAAGAAGAAGC  
ACCGGCTAAATACGTG

>1099 len=137 tot-seq=23

TGGGGAATATTGGGCAATGGGGGAAACCCTGACCCAGCAACGCCGCGTGAAGGAAGAAGG  
TTTTCGGATTGTAAACTTCTGTCCTTGGTGAAGAGAAGAAGACGGTAGCCAAGGAGGAAG  
CCCCGGCTAACTACGTG

>1100 len=137 tot-seq=23

TGGGGGATATTGCACAATGGGGGAAACCCTGATGCAGCGACGCCCGTGAGGGAAGACGG  
TCCTCTGGATTGTAAACCTCTGTCTTCGGGGACGAAACGAGACGGTACCCGAGGAGGAAG  
CCACGGCTAACTACGTG

>1101 len=138 tot-seq=23

TGGGGAATATTGGGCAATGGGCGCAAGCCTGACCCAGCAACGCCCGTGAGTGATGAAGG  
TCTTCGGATTGTAAACTCTTTAAGCAGGGAAGAAGAAAGTGACGGTACCTGCAGAATAA  
GCATCGGCTAACTACGTG

>1102 len=144 tot-seq=23

ATGATGGCCCTGTTTCCACGGGTCATAGGAAGAACTTTGAATACGTGCTCTGATCCCTG  
AAAGTCAAGAGGACCAGCAAAAGAGATTCTGAGGAGAGGGCTATGTGACACAGGAGGACA  
GAGGAGGGAGACAAACAGATATGG

>1103 len=155 tot-seq=23

TGAGGAATATTGGTCAATGGTCGGCAGACTGAACCAGCCAAGTCGCGTGAGGGAAGACGG  
CCCTACGGGTTGTAAACCTCTTTTGTTCGGAGAGTAAAGTACGCTACGTGTAGCGTAGTGC  
AAGTATCCGAAGAAAAAGCATCGGCTAACTCCGTG

>1104 len=155 tot-seq=23

TGAGGAATATTGGTCAATGGGCGGAAGCCTGAACCAGCCAAGTAGCGTGCAGGATGACGG  
CCCTACGGGTTGTAAACTGCTTTTATACGGGAATAACGTGCACTACGTGTAGTGCCTTGC  
ATGTACCGTATGAATAAGGACCGGCTAATTCCGTG

>1105 len=156 tot-seq=23

TGAGGAATATTGGTCAATGGGCTTACGCCTGAACCAGCCAAGTCGCGTGAGGGAAGACTG  
CCCTATGGGTTGTAAACCTCTTTTGTTCAGGGAGCAATTGGCGCTACGTGTAGCGTTATCG  
AGAGTACCTGAAGAAAAAGCATCGGCTAACTCCGTG

>1106 len=160 tot-seq=23

TGGGGAATTTTGGACAATGGGGGAAACCCTGATCCAGCCATGCCCGGTGTATGAAGAAGG  
CCTTAGGGTTGTAAAGTACTTTTGTAGGGAAAGAAAAGCTAGTTTTTAATAAAAATTAGT  
GATGACGGTACCTAAAGAATAAGCACCGGCTAACTACGTG

>1107 len=160 tot-seq=23

TAGGGAATCTTCCACAATGGGCGAAAGCCTGATGGAGCAACGCCGCGTGAGTGAAGAAGG  
TTTTCGGATCGTAAAACCTCTGTTGTAAGGGAAGAACAAGTACAGTAGTAACTGGCTGTAC  
CTTGACGGTACCTTATTAGAAAGCCACGGCTAACTACGTG

>1108 len=185 tot-seq=23

TGGGGAATATTGCACAATGGGCGCAAGCCTGATGCAGCGACGCCGCGTGAGGGATGGAGG  
CCTTCGGGTTGTAAACCTCTTTTGTGGGAGCAAGCCTTCGGGTGAGTGTACCTTTCGA  
ATAAGCGCCGGCTAACTACGTGCCAGCAGCCCGTAATGATAAGATCGGAAGAGCGTCGT  
GTTGG

>1109 len=191 tot-seq=23

TGGGGAATATTGGACAATGGGCGAAAGCCTGATCCAGCAATGCCGCGTGAACGATGAAGG  
CCTTAGGGTTGTAAAGTTCTTTCGGTGGGGAAGATAATGACGGTACCCACATAAGAAGCT  
CCGGCTAACTCCGTGTTTCGGTGGGGAAGATAATGACGGTACCCACATAAGAAGCTCCAG  
CTAACTCCGTG

>1110 len=200 tot-seq=23

TGGGGAATCTTCCGCAATGGGCGAAAGCCTGACGGAGCAATGCCGCGTGAGTGAAGAAGG  
CCTTCGGGTTGTAAAGCTCTATCCTTGTCCAAGAGAGCGAGTGGTAGTAACTGACCAATC  
GAGGACGGTAGACAAGAAGGAAGCCCCGGCTAACTATGTGGAGGACGGTAGACAAGAAGG  
AAGCCCCGGCTAACTATGTG

>1111 len=209 tot-seq=23

GCATGCAAATTACCACTCCCGACCCGAAGAGGTAGTGACGAAAATAACAATACAGGAC  
TCTTTCGAGGCCCTGTAATTGGAATGAGTCCACTTTAAATCCTTTAACGAGGATCCATTG  
GAGGGCAAGTCTGGTGTTCGAGGCCCTGTAATTGGAATGAGTCCACTTTAAATCCTTTAA  
CGAGGATCCATTGGAGGGCAAGTCTGGTG

>1112 len=221 tot-seq=23

GAAAAAAACTCTTTAGATTTACTCAAATTTCTGAGTTGCCAAATTCATGATTTGATT  
AGGTAAAGCGCTGAGACTGATGCTAGATACTAGTATCACATACTCGCACAAAGGATTCGC  
TGCCAGGATGACCAACTGCTCTGGACAAAGGGAAGACTACTTACAAGGTTCTGACCTCA  
TGGTGCTTAGGAGATGAGAGAGACAATGATAAGCACTAAGA

>1113 len=224 tot-seq=23

CACGGTGGAGCGAAATGAGTTCAGTGACGTCGTTTGAGCCCCAAATCCAGCCGAGATGA  
AGCCAGCCCTAGTCCCTGGCCTTTTTGAGTTTATGATCCAATAAATTCCTTTTTGTTAA  
GCCAGTTTAGGTTGGGTTTTCTGTTACTTGGAACAGAAAGCGTTCTAGCTGATACAGGTT  
TCAAACAGGAATGCAACGCCGTCATGTGTTTTAGTAATGTCACT

>1114 len=155 tot-seq=23

TGAGGAATATTGGTCAATGGCCGAGAGGCTGAACCAGCCAAGTCGCGTGAGGGAAGAATG  
TCCTATGGATTGTAAACCTCTTTGTCAGGGAGCAAAGTCACCCACGTGTGGGTGTTGGA  
GAGTACCTGAAGAAAAGCATCGGCTAACTCCGTG

>1115 len=135 tot-seq=23

TGGGGAATATTGCGCAATGGGGGAAACCCTGACGCAGCAACGCCGCGTGAATGAAGAAGG  
CCTTAGGGTTGTAAAGTTCTGTTTACGGGGACGATAATGACGGTACCCGTGGAGGAAGCC  
ACGGCTAACTACGTG

>1116 len=137 tot-seq=23

TGGGGAATATTGGGCAATGGGGGAAACCCTGACCCAGCAACGCCGCGTGAAGGAAGAAGG  
CCTTCGGGTTGTAAACTTCTTTTGGCAGGGACGAAGGACGTGACGGTACCTGCAGAAAAA  
GCAACGGCTAACTACGT

>1117 len=217 tot-seq=23

ATACGAGATGCGATAGTGACTGGAGTTCAGACGTGTGCTCTTCTCCTACGGGAGGCAGCA  
GTGAGGAATATTGGTCAATGGGCGAGAGCCTGAACCAGCCAAGTCGCGTGAAGGAAGACT  
GCCCCGAAGGGTTGTAAACTTCTTTTGTATGGGATTAAGTCGTCTACGTGTAGGCGTTT  
GCAGTTACCATACGAATAAGCATCGGCTAACTCCGTG

>1118 len=186 tot-seq=23

GACGGGGGGGGACAGGAACTCAGTCCAGCACAGTGAGTAGGCAGGGGACTAAGACCAGA  
GCTAGCTAAGGTCATCAGGGGTCTCAAGGTTGAGTCCCGATGGCTTCATAAGAACAGAAT  
GAACCTGGAAGAGCACACATTTGTA CTCTCTCTCTTTCCCTGTCCCACTCTGGGAATC  
TGCCAG

>1119 len=130 tot-seq=23

GCGCGCAAATTACCCAATCCTGACACAGGGAGGTAGTGACAATAAATAACGATACAGGGC  
CTTTGGTCTTGTAATTGGAATGAGTACAACGTAAATACCTTAACGAGGAACAATTGGAGG

GCAAGTCTGG

>1120 len=182 tot-seq=23

GACCACAAGAACTGGTAGAACCCAAGGAAGGTTGGGTGGCTGTGCTGAATGGCTTGATAA  
AGGTGGGCCTGGGGTGTGTACAGGGTCAAGCCACTTAAAAGGAGACCTGGGCTGATCTG  
GCTTTGGGGGTGGCAGGGCCGGCCCAAGCCTGGGAGATACAGGGTCATACCTAATCCATT  
CA

>1121 len=185 tot-seq=23

TGGGGAATATTGCACAATGGGCGCAAGCCTGATGCAGCAACGCCGCGTGAACGATGAAGG  
TCTTCGATCGTAAAGTTCTGTTGCAGGGGAAGATAATGACGGTACCCTGTGAGGAAGCC  
CCGGCTAACTACGTGCCAGCAGCCGGGTAATGTCTAGATCGGAAGAGCGTCGTGTAGGGA  
AAGAG

>1122 len=141 tot-seq=23

TGGGGAATATTGCACAATGGGCGCAAGCCTGATGCAGCGACGCCGCGTGGGGGATGACGG  
CCTTCGGGTTGTAAACTCCTTCGACAGGGACGAAGCTATAAGTGACGGTACCCTGTAGAA  
GAAGCACCGGCTAACTACGTG

>1123 len=199 tot-seq=23

TGGGGAATATTGCACAATGGGCGCAAGCCTGATGCAGCCATGCCGCGTGTATGAAGAAGG  
CCTTCGGGTTGTAAAGTACTTTTCAGCGGGGAGGAAGGCGATAAGGTTAATAACCTTGTCG  
ATTGACGTTACCCGAGAAAGAACCCGGCTAACTCCGTGCCAGCAGCCGCGGTAGATCG  
GAAGAGCGTCGTGTAGGGG

>1124 len=140 tot-seq=23

TAGGGAATCTTCGGCAATGGGGGGAACCCTGACCGAGCAACGCCGCGTGAGGGATGGAGG  
CCTTCGGGTTGTAAACCTCTTTATCGGGGAGCAAGCGAGAGTGAGTTTACCCGTTGAAT  
AAGCACCGGCTAACTACGTG

>1125 len=161 tot-seq=23

TGGGGAATCTTCACAATGGGCGAAAGCCTGATGCAGCGACGCCGCGTGAGTGAAGAAGG  
TTTTCGGATCGTAAAGCTCTGTTGTAAGAGAAGAACGTGTGTGAGAGTGGAAGTTTACA  
CAGTGACGGTAACTTACCAGAAAGGGACGGCTAACTACGTG

>1126 len=144 tot-seq=22

GGGACAATGGATAGCAGAGACCTTACAGGTCTCATGAGCTGGGACAGAGGCCTAGCTCTC  
TTRACTCATCAAATGCATGAACTGCATAAGGAGCTAACTTCTGTAAGCCTCAGGCTCTCTA  
TCTAGTACTGAATTATTAGAAACC

>1127 len=159 tot-seq=22

TAGGGAATCTTCCACAATGGACGCAAGTCTGATGGAGCAATACCACGTGAACGATGAAGG  
TCTTCTGATTGTAAAGTTCTTTATTTAGGAAAAAAGCGTGCTAGGAAATGAGCGCGCC  
TTGATGGTACTAATTGAATAAGTGACAGCTAACTATGTG

>1128 len=160 tot-seq=22

TAGGGAATCTTCCACAATGGACGCAAGTCTGATGGAGCAACGCCGCGTGAGTGAAGAAGG  
TTTTCGGATCGTAAAGCTCTGTTGTTGGAGAAGAACGTATCTGAGAGTAACTGTTCAAGT  
AGTGACGGTATCCAACCAGAAAGTCACGGCTAACTACGTG

>1129 len=160 tot-seq=22

TGAGGAATTTTGGACAATGGGGGCAACCCTGATCCAGCCATTCCGCGTGAATGAAGAAGG  
CCTTCGGGTTGTAAAGCTCTTTCAGCAGGAACGAAACGGCGGGCTTAACAGGGCCTGCT  
AATGACGGTACCTGCAGAAGAAGCACCGGCTAACTACGTG

>1130 len=160 tot-seq=22

TGGGGAATTTTGGACAATGGGCGCAAGCCTGATCCAGCCATGCCGCGTGCAGGATGAAGG  
CCTTCGGGTTGTAAACTGCTTTTGTACGGAACGAAAAGGTTTGGCCTAATAAGCTGAGCT  
CATGACGGTACCGTAAGAATAAGCACCGGCTAACTACGTG

>1131 len=161 tot-seq=22

TAGGGAATCTTCCGCAATGGACGAAAGTCTGACGGAGCAACGCCGCGTGAGTGATGAAGG  
TTTTCGGATCGTAAACTCTGTTGTTAGGGAAGAACAAGTACCGTTTGAATAGGGCGGCA  
CCTTGACGGTACCTAACCAGAAAGCCACGGCTAACTACGTG

>1132 len=170 tot-seq=22

AAGACAAGCCTTGGTTGGAGAGGGAAGAATACTGACTGGGTTCAAGTGTAGCCAAAACCTT  
GATATCTGGAGGAAGAAGCCACGGCAGCTGCTCTGCCATGTTCCATGAGCACCTTGCTTC  
TCTGAAAAGCAGTGGAGAAGCATTAGATGTTTCAACACCAGGGGTGAGTG

>1133 len=190 tot-seq=22

AATAACACTAACCACTGGAGAAATGTGAATCAGAACCCTACACCCATTATGATGGCAAGA



TCCCCTCTCCCAAAAAAAGTGTTGAAGAAAATGTGAGCAATTTGAGCCCTTGTCTGCT  
GCTAAGGGAAATATAAGCATTGTAACCACTAAGGAAAACATTGTTGAGATACGAGTGACA  
TACGAGTGAC

>1134 len=214 tot-seq=22

TGGGGAATATTGCGCAATGGGCGAAAGCCTGACGCAGCGACGCCGCGTGAGGGATGAAGG  
TCTTCGGATCGTAAACCTCTGTCAGAAGGGAAAAATGTACAGTGCCCCAATCAACTGT  
ATTGATGGTACCTTCAGAGGAAGCACCGGCTAACTCCGTGCCAATCAACTGTATTGAT  
GGTACCTTCAGAGGAAGCACCGGCTAACTCCGTG

>1135 len=160 tot-seq=22

TAGGGAATCTTCGGCAATGGACGGAAGTCTGACCGAGCAACGCCGCGTGAGTGAAGAAGG  
TTTTCGGCTCGTAAAGCTCTGTTGGTAGTGAAGAAAGATAGAGGTAGTAACTGGCCTTTA  
TTTGACGGTAATTACTTAGAAAAGTCACGGCTAACTACGTG

>1136 len=161 tot-seq=22

TGGGGAATCTTCGCAATGGGCGAAAGCCTGACGGAGCAACGCCGCGTGAGTGAAGAAGG  
CCTTCGGGTCGTAAAGCTCTGTCTTTAGGGAAGAACATCTTATGTGTGAACAATGCATAA  
GACTGACGGTACCTGAGGAGGAAGCTCCGGCTAACTACGTG

>1137 len=137 tot-seq=22

TGGGGAATATTGCACAATGGGGGAAACCCTGATGCAGCGACGCCGCGTGGGCGAGGAAGT  
ATTCGGTATGTAAAGCCCTGTCAGCGGGGAAGAAGAATGACGGTACCCGACCAAGAAGC  
ACCGGCTAAATACGTGG

>1138 len=135 tot-seq=22

TGGGGAATATTGCGCAATGGGGGAAACCCTGACGCAGCAACGCCGCGTGCGGGATGAAGG  
CTTCGGGTTGTAAACCGCTTTCAGCAGGGAAGATAATGACGGTACCTGCAGAAGAAGCC  
CCGGCTAACTACGTG

>1139 len=209 tot-seq=22

TGGCTCTGGGGTTACCTTCGGCCTGTGCTGAAGATTCTTCTCAATCTCTGGCCCTGACCT  
CTTCCTGAAGGTCAGACTCAACGTTTGCTTCTCTCAAGTTTGACATCAAGAGCCTGGT  
TCAAAACACTCTTGACACTTCACCCCAAACCAGTCCCCACCCCAAGTTCCTTCTTCCAGT  
CAAAGAACTCTGTTTCCCAAGTTATTCAA

>1140 len=160 tot-seq=22

TGGGGAATATTGGACAATGGGCGCAAGCCTGATCCAGCAATGCCGCGTGTGTGAAGAAGG  
CCTGCGGGTTGTAAAGCACTTTCAGTGGGGAGAAAGAACTATCACTAATATTGATAGTG  
GATGATGTTACCCACAGAAGAAGCACCGGCTAATTCTGTG

>1141 len=160 tot-seq=22

TAGGGAATCTTCGGCAATGGACGGAAGTCTGACCGAGCAACGCCGCGTGAGTGAAGAAGG  
TTTTCGGATCGTAAACTCTGTTGTTAGAGAAGAACAGCGCATAGAGTAACTGTTATGCG  
TGTGACGGTATCTAACCAGAAAGCCACGGCTAACTACGTG

>1142 len=217 tot-seq=22

GTCTGGGAAATGGGGCTTTTTGAAATGGGAACATGAAGTTAGAGAGGTCCTGGCAAGAT  
GGTAGTCTTATTTAATGATTCCGTTTGAAGCATTGGAGACACTCACATCCTTGGGCAAT  
AGGAGTGTCTTACAAAGATAGGGAAGGGGCCCTGGGGCCCAGGACAGCTGCCAGGAGTGG  
CCTCTCAAGGAGCTGCTGTCCCAGATGCAGGTGAGAC

>1143 len=140 tot-seq=22

TAGGGAATCTTCGGCAATGGGCGCAAGCCTGATGCAGCGACGCCGCGTGAGGGATGGAGG  
CCTTCGGGTTGTAAACCTCTTTTATCGGGGAGCAAGCGAGAGTGAGTTTACCCGTTGAAT  
AAGCACCGGCTAACTACGTG

>1144 len=133 tot-seq=22

CAGGAGCAGAATCAGGAGTGGGAGAGGGAAAGGGAATGGCAGGAGAAGGGAGAGGGGGAG  
AGGTAGGGTAAGGGGCCAGAGCAGAAACAGGAGGAAGAGGAGGAGGAGGAAGAGGAGGAG  
GAGGAGGAGGAGG

>1145 len=161 tot-seq=22

TGGGGAATATTGCGCAATGGGGGAAACCCTGACGCAGCGACGCCGCGTGCGGGATGAAGG  
CCTTCGGGTTGTAAACTCTGTGATTCGGGACGAAAGATAAGTAGACGAATAATCTGCAT  
AAGTGACGGTACCGAAAAAGCAAGCCACGGCTAACTACGTG

>1146 len=135 tot-seq=21

TCGGGAATATTGCGCAATGGAGGAAACTCTGACGCAGTGACGCCGCGTATAGGAAGAAGG  
TTTTCGGATTGTAAACTATTGTCGTGAGGGAAGAAGATGACAGTACCTCAGGAGGAAGCT  
CCGGCTAACTATGTG

>1147 len=135 tot-seq=21

TGGGGAATATTGGACAATGGGCGCAAGCCTGATCCAGCCATGCCGCGTGAGTGATGAAGG  
CCTTAGGGTTGTAAAGCTCTTTTGTCCGGGAAGATAATGACTGTACCGGAAGAATAAGCC  
CCGGCTAACTTCGTG

>1148 len=135 tot-seq=21

TGGGGAATATTGGACAATGGGCGCAAGCCTGATCCAGCCATGCCGCGTGAGTGATGAAGG  
TCTTAGGATTGTAAAGCTCTTTCACCGGAGAAGATAATGACGGTATCCGGAGAAGAAGCC  
CCGGCTAACTTCGTG

>1149 len=138 tot-seq=21

TGGGGAATATTGGGCAATGGAGGCAACTCTGACCCAGCAATGCCGCGTGAATGAAGAAGG  
TCTTCGGATTGTAAAGTTCTTTAATTAGGGACGAAAAAATGACGGTACCTAAGGAATAA  
GCCACGGCAAACCTATGTG

>1150 len=140 tot-seq=21

TGGGGAATATTGCACAATGGGCGGAAGCCTGATGCAGCGACGCCGCGTGAGGGATGAAGG  
CCTTCGGGTTGTAAACCTCTTTCAGCAGGGACGAAGCGTGAGTGACGGTACCTGCAGAAG  
AAGCACCGGCTAACTACGTG

>1151 len=149 tot-seq=21

TATTGGTCAATGGGCGGAAGCCTGAACCAGCCATGCCGCGTGAAGGAATGAGGCCCTACG  
GGTCGTGAACTTCTTTTGTGGCGGAGCAATAAGGGCCACGTGTGGTCCGACGAGAGTACG  
TCACGAATAAGCACCGGCTAACTCCGTGG

>1152 len=149 tot-seq=21

TAGGGAATCTCCACAATGGGCGAAAGCCTGATGGAGCAATACCATGTGAACGATGAAGG  
CCTTTTGGTTGTAAAGTTCTTTTATGAGGGATAACAATGATAGTACCTCATGAATAAGT  
GACAGCAAACCTATGTGGCCAGCAGTAGGG

>1153 len=155 tot-seq=21

TGAGGAATATTGGTCAATGGGCGCGAGCCTGAACCAGCCAAGTAGCGTGAAGGATGACGG  
CCCTATGGGTTGTAAACTTCTTTTATATGGGAATAAAGTTTGGTATGCATACCATTTTGT  
ATGTACCATATGAATAAGGATCGGCTAACTCCGTG

>1154 len=160 tot-seq=21

TAGGGAATCTTCCGCAATGGACGAAAGTCTGACGGAGCGACGCCGCGTGAATGATGAAGG  
TCTTAGGATCGTAAAATTCTGTTGTTAGGGATGAACAAGTGTGAGAGTAACTGCTCACAC  
CTTGACAGTACTTAACCAGAAAGCCCCGGCTAACTACGTG

>1155 len=160 tot-seq=21

TGGGGAATATTGCACAATGGGCGAAAGTCTGACGGAGCAACGCCGCGTGAGTGAAGACGG  
CCTTCGGGTTGTAAAGCTCTGTGATTCGGGACGAAAGGCCATATGTGAATAATATATGGA  
AATGACGGTACCGAAAAAGCAAGCCACGGCTAACTACGTG

>1156 len=160 tot-seq=21

TAGGGAATCTTCCGCAATGGACGAAAGTCTGACGGAGCAACGCCGCGTGTGTGAAGAAGG  
TCTTCGGATCGTAAAGCACTGTTATTAGAGAAGAACAACCGGTAGAGTAACTGTTACCGG  
CTTGACGGTATCTAACCAGAAAGCCACGGCTAACTACGTG

>1157 len=207 tot-seq=21

CCAGGGTGA CTGGAGTTCAGACGTGTGCTCTTCCGTCTCCTACGGAAGGCAGCTTTGGGG  
AATATTGCACAATGGGGGAAACCCTGATGCAGCGACGCCGCGTGAGTGAAGAAGTATTTCC  
GGTATGTAAAGCTCTATCAGCAGGGAAGAAATAAAGTCCTTCGGACTTTGGACGGTACCT  
GACTAAGAAGCCCCGGCTAACTACGTG

>1158 len=236 tot-seq=21

ATCACCATGCCCCCTAGAAGGGTTCTGATCACCGGAGGGCAGCCCCAAAGGCCACAGT  
CCCCTCCTGTGCTGGCAGCTTTGCCACACATACCCAGCAGCTCCCCAGGCTGAAAGCAG  
CCCTGGCCCAGGGTCTCCATGGTTCTAGGCAGACCCTCTTCTCCTTCGGGACAGAAAGA  
CAATGTGAGTTCATTTCTCCATCCTCAGACCGTGACATCTCCCCTAGGCTCCCC

>1159 len=135 tot-seq=21

TGGGGAATATTGCACAATGGGCGCAAGCCTGATGCAGCAACGCCGCGTGAACGAAGAAGG  
TATTCGTATCGTAAAGTTCTGTCCTATGGGAAGATAATGACAGTACCATAGAAGAAAGCT  
CCGGCTAAATACGTG

>1160 len=135 tot-seq=21

TGGGGAATATTGCACAATGGGCGAAAGCCTGATGCAGCAACGCCGCGTGAAGGAAGAAGT  
ATTCGGTATGTAACTTCTATCAGCAGGGAAGACAGTGACGGTACCTGACTAAGAAGCC  
CCGGCTAACTACGTG

>1161 len=160 tot-seq=21

TGGGGAATATTGGACAATGGGGGCAACCCTGATCCAGCAATGCCGCGTGTGTGAAGAAGG  
CCTGCGGGTTGTAAAGCACTTTCAGTAGAGAAGAAAAGCCTAAGGTTAATAACCTTGAGT  
CTTGACGTAACCTACAGAAGAAGCACCGGCTAACTCCGTG

>1162 len=135 tot-seq=21

TGGGGAATATTGGACAATGGGCGAAAGCCTGATCCAGCGACGCCGCGTGAGTGAAGAAGT  
ATTTCCGGTATGTAAAGCTCTATCAGCAGGGAAGAAAATGACGGTACCTGACTAAGAAGCC  
CCGGCTAACTACGTG

>1163 len=161 tot-seq=21

TGGGGAATTGTTTCGCAATGGGCGCAAGCCTGACGACGCAACGCCGCGTGGAGGACGAAGA  
TCTTCGGGTCGTAAACTCCTGTGCGAGCGGGAAGAATGGGTGCGGGGTGAATACCCTCGCA  
TCGTGACGGTACCGCTAAAGGAAGCCCCGGCTAACTCCGTG

>1164 len=156 tot-seq=21

TGGGGAATATTGGACAATGGGGGCAACCCTGATCCAGCCATGCCGCGTGTGTGAAGAAGG  
TCTTCGGATTGTAAAGCACTTTAAGTTGTGAGGAAGGGGTAGAGTAATGACCTACTTTTG  
ACGTTAGCAACAGAATAAGCACCGGCTAACTTCGTG

>1165 len=113 tot-seq=21

GGGCAGAGGCACGGATAACCACATTTGGTTCATTGCAGGCGCCGGGGACATCACTCAGGC  
CCGGCAAGGAGCCAGTCATCCAGACTGCATGTGCCCTGCAGGGAACCGTCTC

>1166 len=138 tot-seq=21

TGGGGAATATTGGGCAATGGGCGAAAGCCTGACCCAGCAACGCCGCGTGAGGGAGGAAGG  
TTTTCGGATTGTAAACCTCTGTCCTTGGGGAAGAAGAAAGTGACGGTACCCAAGGAGGAA  
GCCCCGGCTAACTACGTG

>1167 len=160 tot-seq=21

TGGGGAATATTGGACAATGGAGGCAACTCTGATCCAGCAATTCTGTGTGTGTGAAGAAGG  
TCTTCGGATTGTAAAGCTCTGTTATACGGGACGAAAAAGACGGATGCCAACAGTATCCGT  
CCGTGACGGTACCGTAAGAGAAAGCCACGGCTAACTACGT

>1168 len=159 tot-seq=21

TCGAGAATTTTTACAATGGGGGAAACCCTGATGGAGCGACGCCGCGTGGGGGATGAATG

GCTTCGGCCCGTAAACCCCTGTCATTTGCGAACAAATGCTTTGGTATGAACAATATCAAAG  
TTGATAGTAGCAGAAGAGGAAGAGACGGCTAACTCTGTG

>1169 len=213 tot-seq=21

CCTTTGGGGGGTTGGTAGGGGAACCCAGGGGACCCGGGGAAGGGCTGCTGACTATGGGCC  
TCGGGCAGGGTGTGATCCTCTCTGAGCCTGCAAAATCCACCTCTCGTCTCAGATTGTGG  
GAGGTGAGAACATCAACATCAGGAAGAAAGGAAGCCAGAAGCTGCTGGTTGTAGAAAAAT  
AACTAAAACAAATGGCAGGACTCACAAGCACAT

>1170 len=155 tot-seq=21

TGAGGAATATTGGTCAATGGACGGAAGTCTGAACCAGCCAAGTAGCGTGCAGGATGACGG  
CCCTATGGGTTGTAAACTGCTTTTATGTGGGAATAAAGTGGCGCACGCGTGCGCCATTGC  
ATGTACCTCATGAATAAGGACCGGCTAATTCCGTG

>1171 len=138 tot-seq=21

TGAGGAATATTGGTCAATGGGCGAGAGCCTGATCCAGCAATTCTGTGTGTGTGAAGAAGG  
TTTTAGGACTGTAAACACTTTTAGTAGGGAAGAAAAAATGACGGTACCTACAGAAGAA  
GCAACGGCTAAATACGTG

>1172 len=153 tot-seq=21

TGGGGAATATTGCACAATGGGGGAAACCCCTGATGCAGCGACGCCGCGTGAGTGAAGAAGT  
AATTCGTTACGTAAAGCTCTATCAGCAGGGAAGAAATACTGACCTTACGGTCAGCAGACG  
GTACCTGAGTAAGAAGCCCCGGCTAACTACGTG

>1173 len=160 tot-seq=21

TGGGGAATCTCCGCAATGGACGAAAGTCTGACGGAGCAACGCCGCGTGAGTGAAGAAGG  
TCTTCGGATTGTAAAGCTCTGTTGTTGGTGAAGAAGGACAGGGGTAGTAACTGACCTTTG  
TTTGACGGTAATCAATTAGAAAGTCACGGCTAACTACGTG

>1174 len=161 tot-seq=21

TGGGGAATATTGCACAATGGGCGCAAGCCTGATGCAGCAACGCCGCGTGAGCGAAGAAGG  
TCTTCGGATTGTAAAGCTCTGTTATACGGGACGAAAAAGACGGATGCCAACAGTATCCGT  
CCGTGACGGTACCGTAAGAGAAAGCCACGGCTAACTACGTG

>1175 len=101 tot-seq=20

GGAAGCCCGGTCGATTGAGGAGAGGAAGGTGCCCGCTTCCACTTCCACCGTGGTATCGGA

CGTTGTCGGAATCAACTGGCTGGTTTCTGGGTAATCCCCT

>1176 len=115 tot-seq=20

GAAGAGAAGCTGCAGTGCTGCAAGACTCCTGGTAGCTCCAGGCCACAGGGACTGGTCCTG  
TCCTGAAGCCCCAGTCTCAGCCTGAGAGACCTTGCTCTGCCAAGTGAAGTGGCTGG

>1177 len=135 tot-seq=20

TGGGGAATCTTGACAATGGGGGAAACCCTGATGCAGCGACGCCGCGTGAGCGATGAAGC  
CCTTCGGGGTGTAAAGCTCTTTCGACAGGAACGATAATGACGGTACCTGGAGAAGAAGCT  
GCGGCTAACTACGTG

>1178 len=135 tot-seq=20

TGGGGGATATTGCACAATGGAGGGAACCTGATGCAGCAACGCCGCGTGAGGGAAGAAGG  
TCTTCGGATTGTAAACCTTTGTCCTCAGGGAAGATAATGACGGTACCTGAGGAGGAAGCT  
CCGGCTAACTACGTG

>1179 len=135 tot-seq=20

TGGGGAATATTGGACAATGGGCGAAAGCCTGATCCAGCCATGCCGCGTGAGTGATGAAGG  
CCCTAGGGTTGTAAAGCTCTTTTACCTGGGAAGATAATGACGGTACCAGGAGAATAAGCC  
CCGGCTAACTTCGTG

>1180 len=138 tot-seq=20

TGGGGAATATTGGGCAATGGGCGCAAGCCTGACCCAGCAACGCCGCGTGAATGAAGAAGG  
TCTTCGGATTGTAAAGTTCTGTGACTGGGGACGAAAAAATGACGGTACCCAGAGAGGAA  
GCTCCGGCAAACACTACGTG

>1181 len=139 tot-seq=20

TGGGGAATATTGGACAATGGACCAAAGTCTGATCCAGCAATTCTGTGTGCACGATGACG  
TTTTTCGGAATGTAAAGTGCTTTCAGTCGGGAAGAAGCAAGTACGGTACCGACAGAAGA  
AGCGACGGCTAAATACGTG

>1182 len=145 tot-seq=20

GAAGACTCGGTGTGTTTTGAGCCTGGAGAAGCCACATGCCTCCTCTCGTGTGCTGGAGA  
CACAGGGACAGCTAGGCATGTGCCTGGCCCTGGAGTCCCGAGCAGCACAGTCTAGAAGG  
CTCACAGCCGCGTCCCCACTACAG

>1183 len=160 tot-seq=20

TAGGGAATCTCCACAATGGGTGCAAACCTGATGGAGCAATGCCGCGTGAATGAAGAAGG  
TCTTCGGATCGTAAAGTTCTGTTATTAGTGAAGAACAAATCGAGGAGTAACTGTCTCGAT  
TTTGACGGTAACTAACCAGAAAGTCACGGCTAACTACGTG

>1184 len=160 tot-seq=20

TGGGGAATATTGCACAATGGGCGCAAGCCTGATGCAGCCATGCCGCGTGTGTGAAGAAGG  
CTTTCGGGTTGTAAAGCACTTTCAGCGAGGAGGAAAGGGTATTGCTTAATAGGCAATATC  
TGTGACGTTACTCGCAGAAGAAGCACCGGCTAACTCCGTG

>1185 len=196 tot-seq=20

ACTCTAATGCCTCACATCTCCAGGAGGTCTGAACCCCTCTGTGGGGCAGTGCAAGTTCCC  
TGGAGGCTGCGATCTGATTCAGCCCCTAGTCCTTCAACCGAGCAACACAGGGGACACCA  
CCATCCCCATAGGAAGCCTCCAGGACCGAGCTTTCCTGACTTTCCTGCGCCTCCATGA  
GAATCTGTTACGTTAC

>1186 len=201 tot-seq=20

TAGGGAATATTGGGCAATGGGCGGAGCCTGACCCAGCCATGCCGCGTGCCGGATGAAGG  
CCTTCTGGGTTGTAAACGGCTTTTCTCAGGGAAGAAAAGGGTCTGCGGACCAAGCTGAC  
GGTACCTGAGGAATAAGCACCGGCTAACTCCGTGCCAGCAGCCGCGGTATATTCAGATCG  
GAAGAGCGTCGTGTAGGGAAA

>1187 len=203 tot-seq=20

GCTAGGGAGGAATGGAGGCTATGGAGTGTGTGTGTGTGGCATGGACTCACCTAGGGGT  
GGGCCACGGAGGCTGCTGCTCCTATCCTATTGACGTTTCTGCGTGGGTGCCACCGGCTTG  
AAGTGGCAGGCCCCGCCCCCTCCGCAATCTGCAGAGCCTGTGGCCCCTTACCTGGTATTT  
CTCCATCTGAGAGAGGGTGTGT

>1188 len=204 tot-seq=20

TTTCCTCTGTGCGGGGGTGGTATTTTTAGTTGGGTGGGTTAGATGTCACACACACACC  
TGTCTGACCCTTCATACCCCTTAGGTCTGGGTCCCTCTACCCTTCTGTTGCCACCTT  
CCTGCTCACTCCCCCAGACATGACTTATTGCTGGGAATGTGATGGAGGAAACAGAGTAA  
CCTGTTCTCCCACCATCTGGAAG

>1189 len=209 tot-seq=20

GTAGAAGAGAATTGGTCATGGGAAGGCTTTATGTTTTGTAACCTCCTGGCAAGGAAAGGA



GACTACACAATTCTAATGCCTTTTCTACTTCCAATCTTCTTTGCCTCCTTCTGTGGGTC  
TCAGATTGTTGAGGCAGGTAAGACTGAAGACCAGATTCCAGAGATTAGATACCAGGCAGGTAC  
TGAAGACCAGATTCCAGAGATTAGATACC

>1190 len=141 tot-seq=20

TGGGGAATATTGCACAATGGGCGCAAGCCTGATGCAGCGACGCCGCGTGGGGGATGACGG  
CCTTCGGGTTGTAAACTCCTTTGCTAGGGACGAAGCTTTTTGTGACGGTACCTAGATAA  
GAAGCACCGGCTAACTACGTG

>1191 len=132 tot-seq=20

GGAATATTGGACAATGGGGGCAACCCTGATCCAGCAATGCCGCGTGAGTGATGAAGGCCT  
TCGGGTTGTAAAGCTCTTTTCTTGGGGACGATAATGACGGTACCCGAGGAATAAGCCCCG  
GCTAACTTCGTG

>1192 len=161 tot-seq=20

TAGGGAATCTCCGCAATGGACGAAAGTCTGACGGAGCAACGCCGCGTGAGTGAAGAAGG  
TTTTCGGATCGTAAACTCTGTTGTCAGAGAAGAACAAGTTGGAGAGTAACTGCTCCAGC  
CTTGACGGTATCTGACCAGAAAGCCACGGCTAACTACGTGG

>1193 len=180 tot-seq=20

GAAAGGGCCGGGAGGAGCGAGCGGAAAAGGCTGGAAGGGATCGAGAGTCAGTTACCTTGG  
TCCACAGACCCCATGATGCGGAGGGGATGGCAGTGCCCCAGTCTGAACGCAGCCTCTCTC  
TGCATCTGGAGGGCACGGGGACTTGGCGCGTGTGGAAAGGGGGATCTGTTTGTATCGA

>1194 len=154 tot-seq=20

TGGGGAATATTGCACAATGGGCGGAAGCCTGATGCAGCGACGCCGCGTGGGGGATGACGG  
CCTTCGGGTTGTAAACTCCTTTGACCGCGAGGAAGCCGCTGGTTGGAAGGGTGGTGAC  
GGTAGTGGTAGAAGAAGCACCGGCTAACTACGTG

>1195 len=160 tot-seq=20

TAGGGAATCTCCACAATGGACGCAAGCCTGATGCAGCCATGCCGCGTGTGTGAAGAAGG  
CCTTCGGGTTGTAAAGCACTTTGACGGGGAGGAAGGCGATAAGGTTAATAACCTTGTCG  
ATTGACGTTACCCGAGAAAGAACCGGCTAACTCCGTG

>1196 len=138 tot-seq=20

TAGGGAATCTCCACAATGGGCGCAAGCCTGATGCAGCCATGCCGCGTGTGTGAAGAAGG

CCTTCGGGTTGTAAAGCACTTTCGGAGGGGAGGAAAAAATGACGTTACCCTCAGAAGAA  
GCACCGGCTAACTCCGTG

>1197 len=216 tot-seq=20

GGACGGCATAACGAGATTCACGAGTACTGGAGTTCAGACGTGTGCTACGGGAGGCAGCAG  
TGAGGAATATTGGTCAATGGGCGAGAGCCTGAACCAGCCAAGTCGCGTGAAGGAAGACTG  
CCCGCAAGGGTTGTAAACTTCTTTGTATGGGATTAAGTCACCTACGTGTAGGTGTTTG  
CAGTTACCATAACGAATAAGCATCGGCTAACTCCGTG

>1198 len=160 tot-seq=20

TAGGGAATCTCCACAATGGACGCAAGTCTGATGGAGCAACGCCGCGTGAGTGAAGACGG  
CCTTCGGGTTGTAAAGCTCTGTGATTCGGGACGAAAGGCCATATGTGAATAATATATGGA  
AATGACGGTACCGAAAAAGCAAGCCACGGCTAACTACGTG

>1199 len=114 tot-seq=19

CTCAGACCCACAGCTTTGGGTGTGACAAGCAATAACCTAGTTACTGACTCAGCAAGGGA  
CCCAGGCAAGGCCCTGGGCCTCTGCACTTCTGGATTCTCATGTGTAAACCGCCA

>1200 len=116 tot-seq=19

AACCACAAGGTAGCAGTCCCTGAATCGCCATGTGGCACATCTGCCTTAGACTGTTATCTG  
AGCAGGTAATAAACTTCTGTGATGTTAAGCCACAGAGATTTCCGGGGCTTATCTGTT

>1201 len=135 tot-seq=19

TGGGGGATATTGCACAATGGGGGAAACCCTGATGCAGCAACGCCGCGTGAAGGATGAAGG  
TTTTCGGATTGTAAACTTCTGTTCTTAGTGACGATAATGACGGTAGCTAAGAAGAAAGCT  
CCGGCTAACTACGTG

>1202 len=135 tot-seq=19

TGGGGAATTTTTCGCAATGGGGGAAACCCTGACGCAGCAACGCCGCGTGCGGGATGACGG  
CCTTCGGGTTGTAAACCGCTTTCAGTGGGAAAGATTATGACGGTACCCACAGAAGAAGCT  
CCGGCTAACTACGTG

>1203 len=135 tot-seq=19

TAGGGAATCTTCGGCAATGGGGGAAACCCTGACCGAGCAACGCCGCGTGAACGATGAAGG  
TCTTCGGATCGTAAAGTTCTGTTGCAGGGGAAGATAATGACGGTACCCTGTGAGGAAGCC  
CCGGCTAACTACGTG

>1204 len=135 tot-seq=19

TCGGGAATATTGCACAATGGAGGAACTCTGATGCGGTGACGCCGCGTATAGGAAGAAGG  
CTTAGGATTGTAAGCTATTGTTATGTGGGATGAAGAAGACAGTACCACATGAGAAAGCC  
CTGGCTAAATATGTG

>1205 len=135 tot-seq=19

TGGGGAATTTTGCACAATGGAGGAACTCTGATGCAGCGACGCCGCGTGAGTGATGAAGA  
TCTTCGGATTGTAAACTCTGTCCTTAGTGAAGATAATGACAGTAACTAAGAAGCAAGCC  
CTGGCTAAATACGTG

>1206 len=135 tot-seq=19

TGGGGAATATTGGACAATGGGCGCAAGCCTGATCCAGCCATGCCGCGTGGGTGAAGAAGG  
CCTTAGGGTTGTAAACCCCTTTCAGCGGGGAAGATAATGACGGTACCCGCAGAAGAAGTC  
CCGGCTAACTCCGTG

>1207 len=136 tot-seq=19

TTTGAATCTTGCCCAATGGGGGAAACCCTGAGGCAGCGACGCCGCGTGGAGGATGAAGG  
ATTTAGGTTTCGTAAACTCCTTTTGCCAGGAAAGACTTAGGACGGTACCTGGCGAATAAGC  
CCCGGCTAACTCCGTG

>1208 len=136 tot-seq=19

TGGGGAATATTGGGCAATGGGCGAAAGCCTGACCCAGCGACGCCGCGTGCGGGAAGACGG  
TCTTCGGATTGTAAACCGCTTTTATAAGGGACGAAAGATGACGGTACCTTATGAATAAGC  
CACGGCTAACTACGTG

>1209 len=137 tot-seq=19

TGGGGAATATTGGGCAATGGGCGCAAGCCTGACCCAGCAACGCCGCGTGAAGGAAGAAGG  
CTTTCGGGTTGTAAACTTCTTTTGACAGGGAAGAGCAGAAGACGGTACCTGTGAATAAG  
CCACGGCTAACTACGTG

>1210 len=138 tot-seq=19

TGGGGAATATTGGGCAATGGGCGCAAGCCTGACCCAGCAACGCCGCGTGAAGGAAGAAGG  
CTTTCGGGTTGTAAACTTCTTTATTAAGGACGAAACAAATGACGGTACTTAATGAATAA  
GCTCCGGCTAACTACGTG

>1211 len=142 tot-seq=19

TGGGGAATCTTCGCAATGGACGAAAGTCTGACGGAGCAACGCCGCGTGCGGGATGAAGG  
CCTTCGGGTTGTAAACCGCTTTCAGCAGGGACGAGGCCGCAAGGTGACGGTACCTGCAGA  
AGAAGCCCCGGCTAACTACGTG

>1212 len=151 tot-seq=19

TGGGGGATATTGCACAATGGAGGAACTCTGATGCAGCGACGCCGCGTGAGTGAAGAAGT  
ATTTCCGGTATGTAAAGCTCTATCAGCAGGGAAGAAAGACCTCGAAAGAGGGGATGACGGT  
ACCTGAGTAAGAAGCCCCGGCTAACTACGTG

>1213 len=154 tot-seq=19

TGAGGAATATTGGTCAATGGCCGGAAGGCTGAACCAGCCATGCCGCGTGAAGGTCAGTGC  
CCTATGGGCGTTAAACTTCTTTTGTGCGGGAGCAATAAGGTCCACGTGTGGACCGACGAG  
AGTACCGTACGAATAAGCATCGGCTAACTCCGTG

>1214 len=155 tot-seq=19

TAAGGAATATTGGTCAATGGACGCAAGTCTGAACCAGCCATGCCGCGTGGAGGATGAAGG  
CTCTCTGGGTTGTAAACTTCTTTTATCTGGGAAGAAACCCATCTTTTCTAAGGTGGTTGA  
CGGTACCAGATGAATAAGCACCGGCTAACTCCGTG

>1215 len=160 tot-seq=19

TGGGGAATCTTGACAATGCGCGAAAGCGTGATGCAGCAACGCCGCGTGCGGGAAGAAGG  
CCTTAGGGTTGTAAACCGCTTTCAGTTGGGACGAAGCTTCTGGGTTAATAGCCTGTTGA  
AGTGACGGTACCTTCAGAAGAAGCACCGGCTAACTACGTG

>1216 len=160 tot-seq=19

TAGGGAATCTTCCACAATGGACGCAAGTCTGATGGAGCAACGCCGCGTGAGTGAAGAAGG  
CCTTCGGGTTGTAAACTCTGTCTCATCCAAGAGAAGGGAAGGTAGTAACTGACCTTTC  
TAGGACGGTAGATGAGGAGGAAGCCCCGGCTAACTATGTG

>1217 len=160 tot-seq=19

TGGGGAATTTTGGACAATGGGGGGAACCCTGATCCAGCCATGCCGCGTGATGAAGAAGG  
CCTTAGGGTTGTAAAGTACTTTTGTAGGGAAGAAAAGGCATTTGCTAATATCAGATGCT  
GATGACGGTACCTAAAGAATAAGCACCGGCTAACTACGTG

>1218 len=160 tot-seq=19

TAGGGAATCTTCGCAATGGACGCAAGTCTGACGGAGCAACGCCGCGTGTGTGAAGAAGG

TTTTCGGATCGTAAAGCACTGTTATTAGAGAAGAACAGCCGATAGAGTAACTGTTATCGG  
TTTGACGGTATCTAACCAGAAAGTGACGGCTAACTACGTG

>1219 len=160 tot-seq=19

TAGGGAATCTTCCGCAATGGACGCAAGTCTGACGGAGCAACGCCGCGTGTGTGAAGAAGG  
TTTTCGGATCGTAAAGCACTGTTGTTAGAGAAGAACGGCTACTAGAGGAAATGTTAGTAG  
ATTGACGGTATCTAACCAGAAAGCCACGGCTAACTACGTG

>1220 len=161 tot-seq=19

TAGGGAATCTTCCACAATGGACGCAAGTCTGATGGAGCAACGCCGCGTGAGTGAAGACGG  
CCTTCGGGTTGTAAACTCTGTGATTCGGGACGAAAGATAAGTAGACGAATAATCTGCAT  
AAGTGACGGTACCGAAAAAGCAAGCCACGGCTAACTACGTG

>1221 len=177 tot-seq=19

GCAGGATTGGAGCCTTATCCAGGGGCTCCAAAGCCAACATGGGACTGGGCAAGAAAGAAA  
CAGAGCAGAGTGGAGGACTGGTGTCTGCCTCAATGGACACAGCTGCTGGACGCGAGGACG  
TGAGGCCCTCCATGAGCTTCTTGCTCAGGTAGCCTTATCTTCCTTCCACCTCCCTC

>1222 len=203 tot-seq=19

TCACAGCTATACTGTGACCAGAATCTGGGAGCACTTAGATGCTGGGTGGTCCTGGCTCGG  
GCCTTGTCTAAAGACTTGACAAGCACTGACTGTTGGACTTCCTCTCTGTGACTAGCCAA  
CTGCCTGAAGACTCTCCTGTGCTCTCTTCTGGGCTGGTTGAACTTCCTCTAAGGAGTGT  
GGGTGGCTCCCCTCAGTCTGACC

>1223 len=212 tot-seq=19

GATGTGGCGTCTTCCCAGGTTTCATGGCGCTCTGCTGTTTTACCAGAAGCAGACACAGAGA  
TGGGAGTGGCACCTTCCCCGAGACCGTGGGTGGGAGCTGTGTCCACCACCAGCAGTGC  
GCAAGGGCTTTGGGCCAGGGCCCTCCTGAGAATCCCCTCTGCCTCACTGAGAAAATTGA  
CTCCTGTTTCGGTCCCTCTCCTGTTTCGGTCCCT

>1224 len=230 tot-seq=19

CCCAGGCCTCAGGCGGGCTCCCTGCCACACTGTGTCCAGCTCGGAGGACTCGAAGTCTC  
AGCTGGGCGTGCCCTGTGGGATAGGTGCTGCCCCAAAGACTGCAGGAGATAAGAGGAG  
ACCCTCAATTCTCCAGATGCCTTCCCTTCCGAACCCTGCCATGTGTCCTATCCTTGTGGG  
TCTGTCCATCTCATCTCCCAGGCCAGACCATCTCTCCACCAGCAGCAGC

>1225 len=136 tot-seq=19

TGGGGAATATTGCGCAATGGGGGAAACCCTGACGCAGCAACGCCGCGTGATTGAAGAAGG  
CCTTCGGGTTGTAAAGATCTTTAATTGGGGACGAATTTTGACGGTACCCAAAGAATAAGC  
TCCGGCTAACTACGTG

>1226 len=198 tot-seq=19

TGAGGAATATTGGTCAATGGACGAGAGTCTGAACCAGCCAAGTAGCGTGAAGGATGACTG  
CCCTATGGGTTGTAACTTCTTTTATATGGGAATAAAGTGGTCCACGTGTGGATTTTTGT  
ATGTACCATATGAATAAGGATCGGCTAACTCCGTGGGGGGGCCGCGTAATTAGAAGATC  
GGAAGAGCGTCGTGTAGG

>1227 len=156 tot-seq=19

TGAGGAATATTGGTCAATGGGCGAGAGCCTGAACCAGCCAAGTCGCGTGAAGGAAGACTG  
CCCGCAAGGTTGTAACTGCTTTTGTGGGAATAATCGACATTACGTGTAATGTTTTG  
CATGTACCATTGAATAAGGACCGGCTAATCCGTG

>1228 len=140 tot-seq=19

TGGGGAATATTGCACAATGGGCGAAAGCCTGATGCAGCGACGCCGCGTGCGGGATGACGG  
CCTTCGGGTTGTAAACCGCTTTCAGTAGGGACGAAGCTTTTGTGACGGTACCTACAGAAG  
AAGCACCGGCTAACTACGTG

>1229 len=140 tot-seq=19

TGGGGAATATTGCGCAATGGGGGAAACCCTGACGCAGCGACGCCGCGTGCGGGATGAAGG  
CCTTCGGGTTGTAAACCTCTTTCAGCAGGGACGAAGCGCAAGTGACGGTACCTGCAGAAG  
AAGCACCGGCTAACTACGTG

>1230 len=161 tot-seq=19

TGGGGAATATTGCACAATGGGCGGAAGTCTGACCGAGCAACGCCGCGTGAGTGAAGAAGG  
TTTTCGGATCGTAAAGCTCTGTTGTTAGAGAAGAACGTTGGTAGGAGTGAAAAATCTACC  
AAGTGACGGTAACTAACCAGAAAGGGACGGCTAACTACGTG

>1231 len=160 tot-seq=19

TGGGGAATATTGCGCAATGGGGGCAACCCTGACGCAGCCATGCCGCGTGAATGAAGAAGG  
CCTTCGGGTTGTAAAGTTCTTTCGGTGACGAGGAAGGTTGTTGTGTTAATAGCGCAACAA  
ATTGACGTTAATCACAGAAGAAGCACCGGCTAACTCCGTG

>1232 len=160 tot-seq=19

TAGGGAATCTTCCACAATGGACGCAAGTCTGATGGAGCAACGCCGCGTGAGTGAAGAAGG  
GTTTCGGCTCGTAAAGCTCTGTTGTTGGAGAAGAACGTGCGTGAGAGTAACTGTTACGCG  
AGTGACGGTATCCAACCAGAAAGTCACGGCTAACTACGTG

>1233 len=122 tot-seq=19

GGCAGAGATTGGACTGAGAGAGATAGAGAGAGGGAGGGAGAAGGGGAGGGATAAAGAGGG  
ATGGAGAGAAAGAGGGAGAGACAGCAAGTGAAGCCAGACCATGAGGGGCACCCACCGACCT  
CA

>1234 len=160 tot-seq=19

TGGGGAATATTGCGCAATGGGGGAAACCCTGACGCAGCGACGCCGCGTGCGGGATGAAGG  
CCTTCGGGTTGTAAAGCTCTGTGATTCGGGACGAAAGGCCATATGTGAATAATATATGGA  
AATGACGGTACCGAAAAAGCAAGCCACGGCTAACTACGTG

>1235 len=160 tot-seq=19

TAGGGAATCTTCCGCAATGGACGAAAGTCTGACGGAGCAACGCCGCGTGAGTGAAGAAGG  
TTTTCGGATCGTAAACTCTGTTGTTAGAGAAGAACAAGGATGAGAGTAACTGCTCGTCC  
CTTGACGGTATCTAACCAGAAAGCCATGGCTAACTACGTG

>1236 len=115 tot-seq=19

TGATATGAGACCCTGTCTGTGAGTCAACCCTAATGCCAGCTGGGTGATGTAAGCATCTG  
TCGGGGGCACCATTACCTGCTGGCTCCTGGCCTTTCTTTGGCCATGATCCACAC

>1237 len=155 tot-seq=19

TGAGGAATATTGGTCAATGGGCGAGAGCCTGAACCAGCCAAGTAGCGTGCAGGATGACGG  
CCCTATGGGTTGTAAACTGCTTTTGTATGGGGATAAAGTTAGGGACGTGTCCCTATTTGC  
AGGTACCATAACGAATAAGGACCGGCTAATTCCGTG

>1238 len=107 tot-seq=18

AAGGGCTTTAAACTCAATTCTCTGAGCTGTAGCCAAACCCCAAGGCCTCCTGGACACCGA  
GAGCTGGACAGTGCCTGGCTGACCACCCAGGCTGCATGCAGCGTTAC

>1239 len=110 tot-seq=18

TGAGTTTTTACTGTAGAAAAATTTAAAGCTGTATAGATTACATAACCAAATATAGCTGT  
TATGATTCCTTTGAAATCAATCCAAGATATCACCTTCTCCAAAAAATG

>1240 len=135 tot-seq=18

TGGGGAATATTGCACAATGGGCGAAAGCCTGATGCAGCGACGCCGCGTGAAGGATGAAGT  
ATTTCCGGTATGTAACTTCTATCAGCAGGGAAAGAAAATGACGGTACCTGACTAAGAAGCC  
CCGGCTAACTACGTG

>1241 len=135 tot-seq=18

TGGGGAATATTGCACAATGGGGGGAACCCTGATGCAGCGATGCCGCGTGGAGGAAGAAGG  
TTTTCCGATTGTAACTCCTGTCGTAAGGGACGATAATGACGGTACCTTACAAGAAAGCT  
CCGGCTAACTACGTG

>1242 len=140 tot-seq=18

TGGGGAATATTGCACAATGGGCGAAAGCCTGATGCAGCGACGCCGCGTGCGGGATGACGG  
CCTTCGGGTTGTAAACCGCTTTCAGCAGGGAAAGAAGCGCAAGTACGGTACCTGCAGAAG  
AAGCGCCGGCTAACTACGTG

>1243 len=147 tot-seq=18

ACCCCTATGCCACGCGTCCACCTGGGGCTGTCCATCACTTCTGCAAGATCTTGCTGGTA  
GCCAGATTCTCAGAGACCCCAAGTACGCCCCGCTCCTGGTTTTACACCCTGTGTAGTT  
TCCTTTCCCAGGGATGGTCCAAGTGA

>1244 len=155 tot-seq=18

TGAGGAATATTGGTCAATGGACGAAAGTCTGAACCAGCCAAGTAGCGTGCAGGACGACGG  
CCCTCTGGGTTGTAACTGCTTTTAGTTGGGAATAAAACGCGGTACGTGTACCGCCTTGT  
ATGTACCATCAGAAAAAGGACCGGCTAATTCCGTG

>1245 len=155 tot-seq=18

TGAGGAATATTGGTCAATGGACGCAAGTCTGAACCAGCCAAGTAGCGTGCAGGACGACGG  
CCCTCCGGGTTGTAACTGCTTTTATAAGGGAATAAAGTACGCTCGTGAGGCTTTTTGC  
ATGTACCTTATGAATAAGGACCGGCTAATTCCGTG

>1246 len=159 tot-seq=18

TCGAGAATCTTTCACAATGGGGGCAACCCTGATGGAGCGACGCCGCGTGGAGGATAAGGT  
CTTCGGATTGTAACTCCTGTCATGTGTGAACAAGGTTGTCGTGTTAATAGCATGGCAA  
TTGATGGTAACACAAGAGGAAGAGACGGCTAACTCTGTG

>1247 len=160 tot-seq=18



TGGGAATATTGCGCAATGGGGGAAACCCTGACGCAGCGACGCCGCGTGCGGGATGAAGG  
CCTTCGGGTTGTAAAGCACTTTCAGCGGGGAGGAAGGCGATAAGGTTAATAACCTTGTCG  
ATTGACGTTACCCGCAGAAGAAGCACCGGCTAACTCCGTG

>1248 len=161 tot-seq=18

TAGGGAATTTTTACAATGGGCGAAAGCCTGATGGAGCAATGCCGCGTGAATGATGAAGG  
TCTTATAGATTGTAAAATTCTTTATTTGGGAAGAAAACTAAAGTAGGAAATGACTTTA  
GTCTGACTGTACCATTTGAATAAGTATCGGCTAACTATGTG

>1249 len=179 tot-seq=18

AGACGGTGCTAACAGGAAAGTTCATGGCCCTAAACACCTACATCAAAAAGACTGAAAGAG  
CACAACTGACATGCTAAGGTCACACTTCAAGGAACTAGAGAAATAAGAACAAACCAAAC  
CTAATAAACCCCCAGCCCGTAATCACAAGATCGGAAGAGCGTCGTGTAGGGAAAGA

>1250 len=184 tot-seq=18

GAGAAGGGAAAAGAAGCAGAGGCTTATAGCAACCAACACATGATTCTTCAGAGCTAGATG  
TGGAGTCTCCTAACTGGCTTGCAGACTCCACCATAGGCTCACCCATGAGCCCTACAGGAC  
ACTTCACCTGCAGAACCCTCAACTGACAAGCACACCCAGCACTCCATGCACCCACCCAC  
TAGG

>1251 len=196 tot-seq=18

AAGAGGGGAGAAGGAGAAAAATAGAGGTGAGAGTGGAATGAGAGGTGAGAGTGGGATGA  
GATTCTTTAACATCTGCTGCCTGTTTCATAGTTCTCAGTCCCGAGAGACGGAATATATTAG  
CATGAAAAGTACTCTCTTCATTTTATCTGGGCACTAGGTCATCTTTTAGCTCTCACTCTG  
TGACTGAACTGTATG

>1252 len=198 tot-seq=18

CAAGAGCAATAAGAGTTCTTAACCGCTGAGCCATCTCACTAGGCCATTTTGGTTTTTTTA  
GGCAGCAGGATTGGGACTGGCCTGGCTCTCTCAGACTGGATGCATCCAGCAGATACTGAC  
AGGCCTTCAAGTATGATTGAGAGGAGTACCCTGGAGATGCAGGAAAACCCACAATGGGG  
GATGGAAGAAGTGGGTGG

>1253 len=203 tot-seq=18

TGAGGAATATTGGTCAATGGCCGGAAGGCTGAACCAGCCAAGCCGCGTGAAGGACGAAGG  
TGCCAAGCATTGTAACTTCTTTGTCAAGGGACAAAATCAGGCTCGAGAGCCTGACCGA

GGGTA CTTGAAGAAAAAGCATCGGCTAACTCCGTGAGAGCCTGACCGAGGGTACTTGAAG  
AAAAAGCATCGGCTAACTCCGCG

>1254 len=209 tot-seq=18

TGGGGAATATTGCACAATGGGCGAAAGCCTGATGGAGCAACGCCGCGTGGGTGAAGAAGG  
TCTTCGGATCGTAAAACCTGTTGTTAGAGAAGAAAGTGC GTGAGAGTAACTGTTACAGT  
TTCGACGGTATCTAAC CAGAAAGCCACGGCTAACTACGTGCCAGCAGTCGCGGAATGACA  
AGATCGGAAGAGCGTCGTGTTGGGGAATA

>1255 len=230 tot-seq=18

GTTTGGGCAAAGGAAGGAGTAAAGCTTGAGTGCAGGCTTGATAAAGCCTTTGCCAGCCC  
CGGGAGCTCTGGAGCATGCATGGCCCAAGTTGTCCCCTGTTGGACAGAAATAGCCAGGCA  
TCTGTGATGAGTCACGGGATGTAGGCTTCCCTGGGAAGGGCATGCTCATGACTGAGCAGC  
TTTCAGGAGCTGAAAGATCTGACAGCTGGAGCTATCAGCCCACGGCACCC

>1256 len=160 tot-seq=18

TGGGGAATATTGCGCAATGGGGGCAACCCTGACGCAGCCATGCCGCGTGAATGAAGAAGG  
CCTTCGGGTTGTAAAGTTCTTTCGGTAGCGAGGAAGGTGGTTAGTTTAATAGGCTAGCCA  
ATTGACGTTAACTACAGAAGAAGCACCGGCTAACTCCGTG

>1257 len=135 tot-seq=18

TGGGGAATCTTGACAATGGGCGAAAGCCTGATCCAGCGACGCCGCGTGGGTGATGAAGG  
CCTTCGGGTTGTAAAGCCCTTTCGCCGGGACGATGATGACGGTACCCGGAGAAGAAGCA  
CCGGCTAACTCCGTG

>1258 len=148 tot-seq=18

TGGGGAATATTGCACAATGGACGGAAGTCTGATGCAGCGACGCCGCGTGGGGGATGAAGG  
CTTTCGGGTTGTAAACTCCTTTTGATGCTGAACAAGGCTCTTTTTAGGGTTGAGGGTAGG  
TGTTGAATAAGCGCCGGCTAACTACGTG

>1259 len=130 tot-seq=18

AACCAACCCTTCCCCTTAGGTAGCCATTGTGTCCAGAGGGTGGGCAACACATATCCAAAA  
GCAGTCTCCTGGAGGGGAGAGAGGGCGTCTCACGCATCCCTTCTGGGTCTCTGAAGGCA  
GAGTGCTGAG

>1260 len=169 tot-seq=18

AGGTGGGGAGGGGATAACTATCCTAGCTCTGCCACTCACTAGCCTTGAATAAACTGGGGT  
TAACATTTCCAGCCTCAGGTTTTTTTTAAATCTTAAAGTGGGGACAATAATAATAGACCT  
TGATGCATGCATTGTTTTGAGGATTAAGTGAGATAAACTTGTAGACCAC

>1261 len=160 tot-seq=18

TAGGGAATCTTCCGCAATGGACGAAAGTCTGACGGAGCAACGCCGCGTGAGTGAAGAAGG  
TTTTCGGATCGTAAACTCTGTTGTAAGGGAAGAACAAGTACGTTAGTAACTGAACGTAC  
CTTGACGGTACCTTACCAGAAAGCCACGGCTAACTACGTG

>1262 len=155 tot-seq=18

TGAGGAATATTGGTCAATGGGCGAGAGCCTGAACCAGCCAAGTCGCGTGAAGGAAGACGG  
TTCTATGGATTGTAAACTTCTTTGCAGGGGAGTAAAACAAGGGATGTATCCCTTCTTGC  
AAGTACCCTGCGAATAAGCATCGGCTAACTCCGTG

>1263 len=135 tot-seq=18

TGGGGGATATTGCACAATGGAGGAAACTCTGATGCAGCGACGCCGCGTGAGTGAAGAAGT  
ATTTCCGGTATGTAAAGCTCTATCAGCAGGGAAGAAAATGACGGTACCTGACTAAGAAGCC  
CCGGCTAACTACGTG

>1264 len=236 tot-seq=18

AGGGGAGTAGGCCCTAGAGTTCAGGCTTCACACGCAGGCACTCAAGCTCATCAGGCCAG  
TGGGAGCAGTGGCCTGAGGAAGTAGGCAGAAGGCTCGGCAGAGTCAGCTTGAGGAGCAGA  
GGGCTAGAAGCCCAGGCCAGGGCCCAGAGTAGCACAACAGCAGAAACCCACGCCAGCGAG  
AGTAAGCAGCGAGAGCCCAGGAGCCGGGCAGCAATCTGCACACTGGGCAAGGACCA

>1265 len=136 tot-seq=18

TGGGGAATATTGCACAATGGGGGAAACCCTGATGCAGCAACGCCGCGTGAGTGAAGAAGT  
ATTTCCGGTATGTAAAGCTCTATCAGCAGGGAAGAAGAGACGGTACCTGACTAAGAAGC  
CCCGGCTAACTACGTG

>1266 len=138 tot-seq=18

TGGGGAATATTGCACAATGGGCGAAAGCCTGATGCAGCAATTCTGTGTGTGTGAAGAAGG  
TTTTAGGACTGTAAACACTTTTAGTAGGGAAGAAAAAATGACGGTACCTACAGAAGAA  
GCAACGGCTAAATACGTG

>1267 len=135 tot-seq=18

TGGGGAATATTGGACAATGGAGGAACTCTGATCCAGCAATTCTGTGTGTGTGAAGAAGG  
TTTTAGGACTGTAAAACACTTTTTAGTAGGGAAGAAAATGACGGTACCTTACTAAGAAGCT  
CCGGCTAAATACGTG

>1268 len=160 tot-seq=18

TAGGGAATCTTCGGCAATGGGGGCAACCCTGACCGAGCAACGCCGCGTGAGTGAAGAAGG  
TTTTCGGATCGTAAAACCTCTGTTGTTAGAGAAGAACACGAGTGAGAGTAACTGTTTCATTC  
GATGACGGTATCTAACCAAGTACGGCTAACTACGTG

>1269 len=136 tot-seq=18

TGGGGGATATTGCACAATGGGGGAAACCCTGATGCAGCGACGCCGCGTGAGGGAAGACGG  
TTTTCGGATTGTAAACCTCTGTCTTTGGGGACGAATTGAGACGGTACCCAAGGAGGAAGC  
TCCGGCTAACTACGTG

>1270 len=104 tot-seq=17

TGAAGAGAACCCAGAGAGTCAGCGCCCAAGCACACGGCACTCAGGAGACTGATGGGCGGG  
AACACATAGGAAAAAGCCTCTATCAGCCACTGGGCATCTCGAGG

>1271 len=136 tot-seq=17

TCGGGAATATTGCACAATGGAGGAACTCTGATGCAGTGACGCCGCGTGCAGGAAGAAGG  
TTTTCGGATTGTAAACTGCTTTAGATAGGGAAGATAAAAGACTGTACCTATAGAATAAGC  
TCCGGCTAACTACGTG

>1272 len=138 tot-seq=17

TGGGGGATATTGCACAATGGGGGGAACCCTGATGCAGCAACGCCGCGTGAGTGAAGAAGG  
CCCTAGGGTCGTAAAGCTCTGTCGTATGGGAAGAAACAAATGACTGTACCATAACAAGAAA  
GCCCCGGCTAACTACGTG

>1273 len=142 tot-seq=17

TGGGGAATATTGCACAATGGGCGCAAGCCTGATGCAGCGACGCCGCGTGAGGGATGGAGG  
CCTTCGGGTTGTAAACCTCTTTTAGCAGGGAGCAAGGCTTCGGTTGAGTGTACCTGTTGA  
ATAAGCACCGGCTAACTACGTG

>1274 len=148 tot-seq=17

TGGGGAATCTTGCACAATGGGCGGAAGCCTGATGCAGCGACGCCGCGTGAGGGATGACGG  
CCTTCGGGTTGTAAACCTCTTTGCTAGGGAAGAAGCCGCTTTGTGGTGGTGACGGTACC

TGGATAAGAAGCACCGGCTAACTACGTG

>1275 len=155 tot-seq=17

TGAGGAATATTGGTCAATGGGCGAGAGCCTGAACCAGCCAAGTCGCGTGAAGGAAGACTG  
TCCTAAGGATTGTAACTTCTTTTATACGGGAATAACGGGCGATACGAGTATTGCATTGA  
ATGTACCGTAAGAATAAGCATCGGCTAACTCCGTG

>1276 len=155 tot-seq=17

TGAGGAATATTGGGCAATGGGCGCAAGCCTGACCCAGCCATGCCGCGTGCAGGATGACGG  
CGCTATGCGTTGTAACTGCTTTTGTAGGAAGAAACCCATCTACGTGTAGGTGGTTGA  
CGGTAATGAATAAGCATCGGCTAACTCCGTG

>1277 len=160 tot-seq=17

TGGGGAATATTGCACAATGGGCGCAAGCCTGATGCAGCAACGCCGCGTGAACGATGAAGG  
TCTTCGGGTTGTAAAGTACTTTCAGCGGGGAGGAAGGGAGTAAAGTTAATACCTTTGCTC  
ATTGACGTTACCCGCAGAAGAAGCACCGGCTAACTCCGTG

>1278 len=160 tot-seq=17

TGGGGAATATTGCGCAATGGGCGAAAGCCTGACGCAGCGACGCCGCGTGAAGGATGAAGG  
TTCTCGGATCGTAAACCTCTGTGAGAAGGGAAGAAATTATATCATGCTAATCAGTGGTGT  
ATTGACGGTACCTTCAAAGGAAGCACCGGCTAACTCCGTG

>1279 len=161 tot-seq=17

TGGGGAATATTGCGCAATGGGGGAAACCCTGACGCAGCGACGCCGCGTGAACGATGACGG  
CCTTCGGGTTGTAAAGTTCTGTTATACGGGACGAATGGTACGACGGTCAATACCCGTCGT  
AAGTGACGGTACCCTAAGAGAAAGCCACGGCTAACTACGTG

>1280 len=161 tot-seq=17

TGGGGAATATTGCGCAATGGGGGAAACCCTGACGCAGCGACGCCGCGTGAACGATGAAGG  
TCTTATAGATTGTAAAGTTCTTTTATATGGGAAGAAACGCTAAGATAGGAAATGATTTTA  
GTTTACTGTACCATTTGAATAAGTATCGGCTAACTATGTG

>1281 len=176 tot-seq=17

TGGGGAATATTGCACAATGGGGGAAACCCTGATGCAGCGACGCCGCGTGAAGGAAGAAGG  
CTTTCGAGTCGTAAAGCTCTGCTCTATGAGAAGATAATGACGGTACCCTGTGAGGAAGCC  
CCGGCTAACTACGTGCCAGCAGCCGCGGTATATAGAGATCGGAAGAGCGTCGTGTA

>1282 len=179 tot-seq=17

TGGGGAATTTTGGACAATGGGGGCAACCCTGATCCAGCAATGCCGCGTGCAGGAAGAAGG  
CCTTCGGGTTGTAAACTGCTTTTGTACGGAACGAAAAGGCTCTGGTTAATACCTGGGGCA  
CATGACGGTACCGTAAGAATAAGCACCGGCTAACTACGTGCCAGAGCCGCGGTAATATA

>1283 len=183 tot-seq=17

TGGGGAATTTTGGACAATGGGGGAAACCCTGATCCAGCAATGCCGCGTGCAGGATGAAGG  
CCTTCGGGTTGTAAACTGCTTTTGTACGGAACGAAAAGTCTTGGGTTAATACCCTGGGAT  
CATGACGGTACCGTAAGAATAAGCACCGGCTAACTACGTGCCAGCAGCCGCGGTATGCC  
AGA

>1284 len=185 tot-seq=17

CAACCTTCCATCTACCCCCCTTTTCTACTCCAGCTCCACCTGCCAGCTGCTTCTGCCACC  
TTCCCACAACCTCCAAGGCTGGATAGGTAAGGAGGATCCGGGCCAAAGGGGCCTCCTTT  
CAGTAAGAGGCGGAATCACTACCTCAGCTTTCTCTCAATCCCCTTTACTACGCAAAGATC  
AGCCC

>1285 len=199 tot-seq=17

GCAGGGGGGCACAGAGGGAGGCCCTGCCTGAGCCAAAGCCACTGAGAGTTTCCAGAGCC  
ACATGGGAGGGACACTCCAGGGACGTGCCTAGGGCTCAGGACAGAAGGTGTCTCCAGCGC  
GGGCAGGATTTCCGAGTGTGAGCTTCCACCTAAGAAAGCCGCTCCCTGTGGCCAGGAGA  
CAATGCCCCAAACCCCGC

>1286 len=204 tot-seq=17

TGAGGAATATTGGTCAATGGGCGAGAGCCTGAACCAGCCAAGTAGCGTGCGGGAAGACGG  
CCCTATGGGTTGTAAACCGCTTTTATTGGGAACAAAGAGCGCCACGTGTGGTGC GTTGC  
GTGTACCTTTTGAATAAGCATCGGCTAATTCCGTGGTGTGGTGC GTTGC GTTGC GTTGC  
GAATAAGCATCGGCTAATCCGTG

>1287 len=206 tot-seq=17

TGTAAATGGAGCAATCTGGGAAGACCTCACTGAGGAGGTGACTTTTGTAGCAAAGACCTGG  
AGGAGGTAGCAAGGGAGATAGCCATGTGAGGATGCAAGGGAAAGGCATCCAGGAAGAGGG  
AGCAGCATGTGCAAAGATCCTGCGGCACTGAGGCCAGGGGATGGAGCAGAAGAGGAACGG  
GGTTTGATGGTTGATAAAGCATCCCT

>1288 len=220 tot-seq=17

GTCATTGGGGTTGCTCCCAGCTGATGGCTCTTTCCTCAGTGAAGTGAAGGTGAGGACCT  
CTGCTGGGCATGAAGGTGGCAGGGAATGTCTGAGCAGAGTGAAGGAAGTCTGAAATAGGT  
CCCATAAAGCAAGGCAGATTTCTGAAGGGGCCGAGGAGCATCATGGGCAGGCTGAGGCC  
TCTGAAGGCTGCGGCCCTTCTCGAGAGCCAGCACCTTGC

>1289 len=161 tot-seq=17

TAGGGAATTTTCGTCAATGGGGGAACCTGAACGAGCAATGCCGCGTGAGCGAGGAAGG  
TCTTCGGATCGTAAAGCTCTGTTGCCGGGACAAAAGGCAGAAAGAGTGGAAAGCTTTCT  
GAGTGATGGTACCCGCGAGGAAGTCACGGCTAACTACGTG

>1290 len=160 tot-seq=17

TGGGGAATATTGGACAATGGGGGAACCTGATCCAGCCATGCCGCGTGTGTGAAGAAGG  
CCTTTTGGTTGTAAAGCACTTTAAGTAGGGAGGAAGACCTAATAATTAACACCTATTAGG  
AATGACGTTACCTACAGAATAAGCACCGGCTAACTCTGTG

>1291 len=107 tot-seq=17

GACAGTATTTACCATCTTGCTGTTTCCTAGCCTTGAGTTGGGCACATGTGTTGAGAACT  
GGGGAAAGTTGGGGAGTCACCATCATAGACACATGAACACCTGTACT

>1292 len=160 tot-seq=17

TGGGGAATCTCCGCAATGGACGAAAGTCTGACGGAGCAACGCCGCGTGAGTGATGAAGG  
TCTTCGGATTGTAAACTCTGTTGTTAGAGAAGAACACGAGTGAGAGTAACTGTTTCATTC  
GATGACGGTATCTAACCAGCAAGTCACGGCTAACTACGTG

>1293 len=138 tot-seq=17

TGGGGAATATTGCACAATGGGCGCAAGCCTGATGCAGCAACGCCGCGTGAACGAAGAAGG  
TCTTCGGATTGTAAAGTTCTGTCCTTGGGGAAGAAGGAAGTGACGGTACCCAAGGAGGAA  
GCCCCGGCTAACTACGTG

>1294 len=210 tot-seq=17

TAGGGAATTTTTCACAATGGGCGCAAGCCTTATGAAGCAATGCCGCGTGAACGATGAAGG  
TCTTATAGATTGTAAAGTTCTTTTATATGGGAAGAAACGCTAAGATAGGAAATGATTTTA  
GTTTGACTGTACCATTGAATAAGTATCGGCTAACTATGTGCCAGCAGCCGCGGATCGGA  
AGAGCGTCGTGTAGGGAAAGAGTGTGGGGG

>1295 len=160 tot-seq=17

TAGGGAATCTTCCACAATGGACGCAAGCCTGATGGAGCAACGCCGCGTGAGTGAAGAAGG  
GTTTCGGCTCGTAAAGCTCTGTTGTTGGAGAAGAACGTGAGTGAGAGTAACTGTTACCGG  
AGTGACGGTAACCAACCAGAAAGTCACGGCTAACTACGTG

>1296 len=109 tot-seq=16

ATTGATAAGCAAAAGGTAGCAGCTATGACAGGAAGTTTCTTTACCACTTGGTGAGTGTT  
TCTATAAACAGCACTGACCCTTCCCTTTGGGGCATTCTTTGTCACC

>1297 len=135 tot-seq=16

TAGGGAATCTTCCACAATGGGGGAAACCCTGATGCAGCAACGCCGCGTGAGTGATGAAGG  
TTTTCGGATCGTAAAGCTCTGTCTTTGGGGAAGATAATGACGGTACCCAAGGAGGAAGCC  
ACGGCTAACTACGTG

>1298 len=135 tot-seq=16

TGGGGAATATTGCACAATGGGCGAAAGCCTGATGCAGCAACGCCGCGTGAGCGATGAAGG  
TCTTCGGATCGTAAAGCTCTGTCTTTGGGGAAGATAATGACGGTACCCTTGGAGGAAGCC  
CCGGCTAACTACGTG

>1299 len=135 tot-seq=16

TGGGGAATATTGCACAATGGGGGAAACCCTGATGCAGCGACGCCGCGTGAGTGAAGAAGT  
ATCTCGGTACGTAAAGCTCTATCAGCAGGGAAGAAAATGACGGTACCTGATTAAGAAGCC  
CCGGCTAACTACGTG

>1300 len=135 tot-seq=16

TGGGGAATATTGCACAATGGGCGAAAGCCTGATGCAGCGACGCCGCGTGAACGAAGAAGG  
CTTTCGAGTCGTAAAGTTCTTTTATATGGGAAGATAATGACGGTACCATAAGAAAAAGCC  
CCGGCTAACTACGTG

>1301 len=135 tot-seq=16

TGGGGAATATTGCACAATGGAGGGAACCTGATGCAGCGACGCCGCGTGAGTGAAGAAGT  
AATTCGTTATGTAAAGCTCTATCAGCAGGGAAGAAAGTGACGGTACCTGAAAAAGAAGCT  
CCGGCTAAATACGTG

>1302 len=135 tot-seq=16

TCGGGAATTTTGCACAATGGACGAAAGTCTGACGCAGCAACGCCGCGTGAGGGATGAAGG



CCTTCGGGTTGTAAACCTCTTTTCTCAGGGACGATAATGACGGTACCTGAGGAAGAAGCC  
ACGGCTAACTACGTG

>1303 len=136 tot-seq=16

TGGGGAATTTTGCACAATGGGGGCAACCCTGACGCAGCGACGCCGCGTGCGGGACGAAGT  
CATTCTGTGACGTAAACCGCTTTCAGCGAGGAAGAACCATGACGGTACTCGCAGAAGAAGC  
CCCGGCTAACTACGTG

>1304 len=136 tot-seq=16

TGGGGAATATTGCACAATGGGGGAAACCCTGATGCAGCGACGCCGCGTGAGTGAAGAAGT  
ATTTCTGGTATGTAAAGCTCTATCAGCAAGGAAGAAGAATGACGGTACTTGACTAAGAAGC  
CCCGGCTAACTACGTG

>1305 len=137 tot-seq=16

TGGGGAATATTGCACAATGGGGGGAACCCTGACGCAGCAACGCCGCGTGAAGGAAGAAGG  
CTTTCGGGTCGTAAACTTCAGACGCTAGTGAAGAAATAAATGACGGTAACTAGGCCGAAG  
CTCCGGCTAACTACGTG

>1306 len=138 tot-seq=16

TGGGGAATTTTGGACAATGGGCGAAAAGCCTGATCCAGCAACGATGCGTGGAGGATGAAGG  
TTCTCGGATTGTAAACTCCTTTTGAGAGGGAAGAAAAAATGACGGTACCTCTCGAATAA  
GCCACGGCTAACTACGTG

>1307 len=138 tot-seq=16

TAAGGAATCTTGCACAATGGGGGAAACCCTGATGCAGCAACGCCGCGTGAACGATGAAGG  
CCTTCGGGTTGTAAAGTTCTGATCTTGGGGAAGAAGAAGTGACGGTACCCAAGGAGAAAAG  
CCCCGGCTAACTACGTGG

>1308 len=138 tot-seq=16

TGGGGGATATTGCACAATGGAGGAAACTCTGATGCAGCAATGCCGCGTGAGGGAAGAAGA  
TTTTCGGATTGTAAACCTCTGTCCCAGCCGAAGAAACGAATGACGGTAGGCTGGGAGGAA  
GCTCCGGCTAACTACGTG

>1309 len=155 tot-seq=16

TGAGGAATATTGGTCAATGGCCGGAAGGCTGAACCAGCCAAGTAGCGTGAAGGACGACGG  
CCCTACGGGTTGTAAACTCTTTTATAAGGGAATAAAGTTGCGTACGCGTACGCATTTGC

ATGTACCTTATGAATAAGCATCGGCTAACTCCGTG

>1310 len=155 tot-seq=16

TGAGGAATATTGGTCAATGGGCGGAAGCCTGAACCAGCCAAGTAGCGTGAAGGATGACTG

CCCTATGGGTTGTAAACTTCTTTTATAAGGGAATAATTGTGGGTACGCGTACCCATTGTC

ATGTACCTTATGAATAAGGATCGGCTAACTCCGTG

>1311 len=155 tot-seq=16

TGAGGAATATTGGACAATGGGTGGGAGCCTGATCCAGCCATTCCGCGTGCAGGAAGAAGG

TCTTATGGATTGTAAACTGCTTTTATATAGGGATAAACCTACTCTCGAGAGGGTAGCTGA

AGGTACTATATGAATAAGCACCGGCTAACTCCGTG

>1312 len=160 tot-seq=16

TGGGGAATATTGCACAATGGGGGAAACCCTGATGCAGCCATGCCGCGTGTGTGAAGAAGG

CCTTCGGGTTGTAAAGCACTTTCAGTAGGGAGGAAAGGTAGCAGCTTAATACGCTGTTGC

TGTGACGTTACCTACAGAAGAAGGACCGGCTAACTCCGTG

>1313 len=160 tot-seq=16

TGGGGAATATTGCACAATGGGCGCAAGCCTGATGCAGCCATGCCGCGTGTGTGAAGAAGG

CCTTAGGGTTGTAAAGCACTTTCAGCGAGGAGGAAGGCGTTGTAGTTAATAGCTGCAACG

ATTGACGTTACTCGAGAAGAAGCACCGGCTAACTCCGTG

>1314 len=160 tot-seq=16

TGGGGAATTTTGGACAATGGGCGCAAGCCTGATCCAGCCATGCCGCGTGTATGAAGAAGG

CCTTCGGGTTGTAAAGTACTTTTGTTCAGGGAAGAAAAGCCTGAGGATAACACCCTCAGGT

CATGACGGTACCTGAAGAATAAGCACCGGCTAACTACGTG

>1315 len=160 tot-seq=16

TGGGGAATTTTGGACAATGGGGGAAACCCTGATCCAGCCATTCCGCGTGAGTGAAGAAGG

CCTTCGGGTTGTAAAGCTCTTTTGTCCGGAACGAAACGGTGGACGTGAATATCGTCCATT

ACTGACGGTACCGGGAGAATAAGCACCGGCTAACTACGTG

>1316 len=160 tot-seq=16

TGGGGAATATTGCACAATGGGCGCAAGCCTGATGCAGCCATGCCGCGTGTATGAAGAAGG

CCTTCGGGTTGTAAAGTACTTTCAGTGGTGAGGAAGGGAGTGTGGTTAATAGCCATATTC

TTTGACGTTAGCCACAGAAGAAGCACCGGCTAACTCCGTG

>1317 len=161 tot-seq=16

TGGGGAATCTCCGCAATGGGCGCAAGCCTGACGGAGCAACGCCGCGTGAGTGAAGAAGG  
CCTTCGGGTCGTAAAGCTCTGTTGTCGGGGACGAATGTTGTTGCTTAGAATATAGGTGAC  
AAATGACGGTACCTGACGAGGAAGCCACGGCTAACTACGTG

>1318 len=161 tot-seq=16

TGGGGAATATTGCACAATGGGCGCAAGCCTGATGCAGCAACGCCGCGTGAACGATGAAGG  
TCTTCGGATCGTAAAGCTCTGTTGTTAGAGAAGAACGTTGGTAGGAGTGAAAATCTACC  
AAGTGACGGTAACTAACCAGAAAGGGACGGCTAACTACGTG

>1319 len=214 tot-seq=16

AGAAGGCAGGGTGAAGAGGGAGGCAGGGATAGGACTGGCTGCAAGCCCAGGATCACGGGG  
GCCACCAGAGGCTGGAAGAGGCAAGAAAGGGCCCTTTCTGGAGCCTTTGGAAGGAGGCC  
AACCCAGTGGACACCTTGGCTCTGGACTTTCAGCCTGCAGAAGTGCGAGGGGATGCACTT  
CTGTTGTTTTGTCCGCCAGAGCGTGGTTAGTT

>1320 len=217 tot-seq=16

TAGGGAATCTCCACAATGGACGCAAGTCTGATGGAGCAACGCCGCGTGAGTGAAGAAGG  
TTTTCGGATCGTAAAGCTCTGTTGTAAGTCAAGAACGAGTGTGAGAGTGAAAGTTCACA  
CTGTGACGGTAGCTTACCAGAAAGGGACGGCTAACTACGTGAGTGGAAAGTTCACACTGT  
GACGGTAGCTTACCAGAAAGGGACGGCTAACTACGTG

>1321 len=160 tot-seq=16

TAGGGAATCTTCGGCAATGGGCGAAAGCCTGACCGAGCAACGCCGCGTGAGTGAAGAAGG  
TTTTCGGATTGTAAACTCTGTTGTTAGGGAAGAACACGTACCGTTTGAATAAGGCGGTA  
CCTTGACGGTACCTAACGAGAAAGCCCCGGCTAACTACGT

>1322 len=161 tot-seq=16

TAGGGAATCTTCGGCAATGGACGCAAGTCTGACCGAGCAACGCCGCGTGAGTGAAGAAGG  
TTTTCGGATCGTAAACTCTGTTGTTAGAGAAGAACAAGGATGAGAGTGGAAAGTTCATC  
CCTTGACGGTATCTAACGAGAAAGCCACGGCTAACTACGTG

>1323 len=150 tot-seq=16

TGGGGGATATTGCACAATGGGCGAAAGCCTGATGCAGCGACGCCGCGTGGGGGATGAAGG  
CCTTCGGGTTGTAAACTTCTTTTGCTCTGAACAAGGCATGCCAATGGGTGTGTTGAGTGT

AGGGGTTGATTAGCGCCGGCTAACTACGTG

>1324 len=155 tot-seq=16

TGAGGAATATTGGTCAATGGGCGAGAGCCTGAACCAGCCAAGTAGCGTGCAGGATGACGG  
CCCTATGGGTTGTAACTGCTTTTATAAGGGAATAAAGTGGGGCTCGTGAGCTCCTTTGC  
ATGTACCTTATGAATAAGGACCGGCTAATTCCGTG

>1325 len=155 tot-seq=16

TGAGGAATATTGGTCAATGGTCGGGAGACTGAACCAGCCAAGCCGCGTGAGGGATGAAGG  
CGCTAAGCGTCGTAAACCTCTTTTGCCGGGGAACAAGAGCGGGGACGTGTCCCCGTGTGA  
GTGTACCCGGAGAAAAAGCATCGGCTAACTCCGTG

>1326 len=186 tot-seq=16

AAGGCTGGGCCAGGGGAGGAAGGGAGCTGGGGAAAGGTGTCTCTGGAGACTGAAGCAGAG  
GAAGGAGAAGGGGGAACATTGGAGAGTTTCTGTAAGGGCATATCCTGTGTCTAAAGGGGG  
TTGGAGAAAAGTCTGTGAGACCCAGGAGCCTGAATGTTCATGTCAGACCTCATCATATGC  
TGAATC

>1327 len=155 tot-seq=16

TGAGGAATATTGGTCAATGGGCGAGAGCCTGAACCAGCCAAGTAGCGTGCAGGAAGACGG  
CCCTATGGGTTGTAACTGCTTTTATGTGGGGATAAAGTGCCTGACGTGTCCCTTATTGC  
ATGTACCATACGAATAAGGACCGGCTAATTCCGTG

>1328 len=134 tot-seq=16

CTTGTGTAACAGCTTTTTTGGGGGTATCCCTCTGCCTCATCCAGTTCCTCAGGTCCCACA  
CACCTACATCACTCTCCCCAGAAGAGGATGCTCCTGCCAGCTTCTGCAGTATTTTCAA  
TCCTCCCAGTGATC

>1329 len=155 tot-seq=16

TGGGGAATATTGCACAATGGGGGAGACCCTGAACCAGCCAAGCCGCGTGAGGGAAGACGG  
CCCTATGGGTTGTAAACCTCTTTTGTGCGGAGAACAAAACCCGGGACGTGTCCCGGACTGC  
GTGTATCCGAAGAAAAAGCATCGGCTAACTCCGTG

>1330 len=135 tot-seq=16

TGGGGAATATTGCACAATGGACGGAAGTCTGATGCAGCAACGCCGCGTGAACGATGAAGG  
TCTTCGGATCGTAAAGTTCTGTTGCAGGGGAAGATAATGACGGTACCCTGTGAGGAAGCC

CCGGCTAACTACGTG

>1331 len=136 tot-seq=16

TGGGGAATATTGGGCAATGGGCGCAAGCCTGACCCAGCAACGCCGCGTGAGCGATGAAGG  
TCTTCGGATTGTAAAGCTCTGTCGCAGGGGACGAAGTATGACGGTACCCTGTAAGAAAGC  
CCCGGCTAACTACGTG

>1332 len=148 tot-seq=16

GAACACCGGTGGGCTGGGGGAAGGGGAAGGGACTTAAGTGTGGCAGTGGGAAATGAGTTT  
TGGACAAGAACATGTGTTTCATTGAATGGCAAAAAAATTAATCATCTTCCCTCTGCCCA  
GTAACATGAGCTGGACGTCTTCTGGGAC

>1333 len=155 tot-seq=16

TGAGGAATATTGGTCAATGGGCGAGAGCCTGAACCAGCCAAGTCGCGTGAGGGATGACTG  
CCCTATGGGTTGTAAACCTCTTTTGTATGGGGGAATAAGCTTACGAGTAGAGTGATGA  
CAGTACCATACGAATAAGCATCGGCTAACTCCGTG

>1334 len=161 tot-seq=16

TAGGGAATCTTCGGCAATGGACGGAAGTCTGACCGAGCAACGCCGCGTGAGTGAAGAAGG  
TTTTCGGATCGTAAAGCTCTGTTGTTAGAGAAGAATGATGGTGGGAGTGGAAAATCCACC  
ATGTGACGGTAACTAACCAGAAAGGGACGGCTAACTACGTG

>1335 len=135 tot-seq=15

TGGGGAATATTGCACAATGGGGGAAACCCTGATGCAGCGACGCCGCGTGAGCGAAGAAGT  
ATTCGGTATGTAAAGCTCTATCAGCAGGGAAGAAATTGACGGTACCTGAGTAAGAAGCT  
CCGGCTAAATACGTG

>1336 len=135 tot-seq=15

TGGGGAATTTTGCACAATGGGGGAAACCCTGATGCAGCGACGCCGCGTGACGATGAAGA  
TCTTCGGATTGTAAAGTACTGTCCTTGGTGAAGATAATGACTGTAACCAAGAAGCAAGCC  
CTGGCTAAATACGTG

>1337 len=135 tot-seq=15

TGGGGAATTTTGGGCAATGGGGGAAACCCTGACCCAGCGACGCCGCGTGAGGATGAAGG  
CCTTCGGATTGTAAACTTCTTTGGCCAGGGACGATAATGACTGTACCTGGAGAACAAGCC  
ACGGCTAACTACGTG

>1338 len=136 tot-seq=15

TCGGGAATTTTGCCAATGGACGAAAGTCTGAGGCAGCAACTCCGCGTGAGGGATGAAGG  
CTTTCGGGTCGTAAACCTCTTTTCCCAGGGAAGATCCAAGACGGTACCTGGGGAATAAGC  
CACGGCTAACTACGTG

>1339 len=136 tot-seq=15

TGGGGAATATTGCACAATGGGGGAAACCCTGATGCAGCAACGCCGCGTGAGTGAGGAAGT  
ATTTCCGGTATGTAAAGCTCTATCAGCAGGGAATAGAAAAGAAGGTACCTGAAAAAGAAGC  
CCCGGCTAACTACGTG

>1340 len=137 tot-seq=15

TGGGGAATATTGGGCAATGGAGGAACTTTACCCAGCAATGCCGCGTGAGTGAAGAAGG  
TCTTCGGATTGTAAAGCTCTTTGATTGGGGATGAAAAAATGACGGTACCCAAAGAACAAG  
CCCCGGCTAACTACGTG

>1341 len=155 tot-seq=15

TGAGGAATATTGGTCAATGGGCGAGAGCCTGAACCAGCCAAGTAGCGTGAAGGAAGACTG  
CCCTATGGGTTGTAAACTTCTTTTATAAGGGAATAAAGAGCGCCACGTGTGGTGTGTTGT  
ATGTACCTTATGAATAAGCATCGGCTAATTCCGTG

>1342 len=155 tot-seq=15

TAGGGAATATTGGGCAATGGATGCAAGTCTGACCCAGCCATGCCGCGTGCCGGATGAAGG  
CCCTCAGGGTTGTAAACGGCTTTTATTCGGGAAGAAGAGCAGGGATGCGTCCTTGTGTGA  
CGGTACCGAATGAATAAGCACCGGCTAACTCCGTG

>1343 len=160 tot-seq=15

TAGGGAATCTTCGGCAATGGGGGAAACCCTGACCGAGCAACGCCGCGTGGGTGAAGAAGG  
TCTTCGGATCGTAAACCTGTTGTTAGAGAAGAAAGTGCCTGAGAGTAACTGTTACAGT  
TTCGACGGTATCTAACCAGAAAGCCACGGCTAACTACGTG

>1344 len=160 tot-seq=15

TGGGGAATTTTGACAATGGGCGCAAGCCTGATCCAGCCATGCCGCGTGCCAGGATGAAGG  
CCTTCGGGTTGTAAACTGCTTTTGTACGGAACGAAACGGCCTTTTCTAATAAAGAGGGCT  
AATGACGGTACCGTAAGAATAAGCACCGGTTAACTACGTG

>1345 len=161 tot-seq=15

TAGGGAATCTTCCACAATGGGCGCAAGCCTGATGGAGCAACACCGCGTGAGTGAAGAAGG  
CCTTCGGGTCGTAAAATTCTGTTGTCAGAGAAGAACGTGCGTGAGAGTAACTGTTACGT  
ATTGACGGTATCTGACCAGAAAGCCACGGCTAACTACGTGG

>1346 len=161 tot-seq=15

TAGGGAATTTTCGGCAATGGGGGGAACCCTGACCGAGCAATGCCGCGTGAAGGATGAAGG  
TTTTCGGATTGTAACTTCTGTTGTATAGGAAGAAAGGTAAGTGGAGTGGAAAGCCACTT  
AATTGACGGTACTATACTAGAAAGCCACGGCTAACTACGTG

>1347 len=175 tot-seq=15

TGGGCGAAAACAGAGCGTGGTCCGAGCAATCCGTATCTGCGGTAGATGTCGGTATAGTTC  
GCCGCTTCGGGATATAGCGATAATGCCATTCGATTCATCGTCCGCTTCGTCGAGATGT  
GTATGCATATACACACCCTGTCGATGTTTCTTTGATAAAGGTCTCCTGCGAGTT

>1348 len=180 tot-seq=15

CCCCTAGACATCCACAAGCACAATTTTTCAGTTAAAAGCAAAAGATATGGGGCTGAGAGA  
GGGCTCAGTGGCTAAGAGCACTGTCTGCTATTCCAGAGGTCTTGAGTTCAATTCGGGGCT  
GAGAGAGGGCTCAGTGGCTAAGAGCACTGTCTGCTATTCCAGAGGTCTTGAGTTCAATTC

>1349 len=183 tot-seq=15

TGGGGAATTTTGACAATGGGGGGAACCTTGATGCAGCGACGCCGCGTGAGGGATGGAGG  
CCTTCGGGTTGTGAACCTCTTTCGCTCGTGTGCAAGCCGCTATTTGGGTAGTGGTGAGTG  
TAGCGGGTAAAGAAGCGCCGGCTAACTACGTGAGCGGGTAAAGAAGCGCCGGCTAACTAC  
GTG

>1350 len=199 tot-seq=15

GGCCTGAAATTAAGTGGTTTTCCCTCCTGCCTGGGAAAGCAGCCTATAGCCTTGTACATGG  
TGTGTGATCAACAAGTGGGGTAGCACTGCTGGTGTGCAAGGGCGCTCCCCCAAGGGCGG  
GGCACGTCATCACTTACCATGATGCAGTTAGGCTTGTATGGACCACAGGTTGACTCGG  
CAGTCATCCCCACCAAGTGG

>1351 len=201 tot-seq=15

TAGGGAATATTGCACAATGGAGGAAACTCTGATGCAGCCATGCCGCGTGTGTGAAGAAGG  
TTTTCGGATCGTAAAGCTCTGTTGTTGGTGAAGAAGGATAGAGGCAGTAACTGGCCTTTA  
TTTGACGGTAATCAACCAGAAAGTCACGGCTAACTACGTGCCAGCAGCCGCTGACAGATC

GGAAGAGCGTCGTGTTAGGGA

>1352 len=203 tot-seq=15

CCCGGCTCCCCAGAGCTGAAAGGAAAGGCGGGAGGAGAGGAGGCGCCTCTCAGCTGA  
GGGGATCCCAAGAGCACCGGTTGGCTGATTGCACGTAATTAGGAAGAAGAAAAAAAAGC  
TCTTGAAAATTAGCTTCCCAAATGCAGATATAATTGCAAGTGCCTTGCAGAGTGATTAC  
AGCGTCGGCCCAATAAATGTTTC

>1353 len=203 tot-seq=15

TGGGAATTTTGGACAATGGGCGCAAGCCTGATCCAGCCATGCCGCGTGTCTGAAGAAGG  
CCTTCGGGTTGTAAAGGACTTTTGTAGGGAAGAAAAGGATAGTGTTAATACCATTATCT  
GCTGACGGTACCTAAAGAATAAGCACCGGCTAACTACGTGCCAGCAGCCGCGGTAAATAG  
ATCGGAAGAGCGTCGTGTAGGGA

>1354 len=205 tot-seq=15

CAGGAGGAACAGAAAGGTTATTTCTTTACTGACTCTTCAAGGACATCAGCAGAATGGT  
TGGGAATGTCATCATGAGCAGCCTCAGCCTCAGAATTACCAGGAGAAGCTGGTCTTCCAG  
GATCAGGTTCTAATGTATATGAGTCACAGGATTTAGGGAAGCAGGCACTTCCCTTCAGT  
CGAAGCAGGCACTTCCCTTCAGTC

>1355 len=212 tot-seq=15

GAGGCATTGACCCCTCAGTTTATTATGGGGATTGAATGAGCTGACACATCTGGGGTACT  
TAAACTGTGCCTGGCGTGTGAGTTGTGATTATTGTTAGTCTGTGCCATAATGGTATCA  
TAAATTATCAACCACCTTTGCCTGGATCCTTGCTTCTGAGAGCTTATCTTTCGAAGTCT  
TTGTCTTTTGGATCCAGTGTGTCCCAACTACA

>1356 len=217 tot-seq=15

CATTGTTCTGAATCCTTTTTGATGGACAAACATTAGATCCCCCTGCAGTTTTCTGGAA  
TCCTATGTAAGGGACAAACACTCAGAACCAGCAGCAGTGTCTGGAATCGTATGTGAGG  
GACAAACTCTCAGAACCTGCAGTTTTCTGGAATCCTATGTGAGGGACAAACACTCAGAAC  
CCAGCAGCAGTGTCTGGAATCGTATGTGAGGGACAA

>1357 len=234 tot-seq=15

CCTTCAGGGGGGAAATCCTGGGTCTCCAGGTGGCCCAACCTTGCCTGGAGTCCCCATGA  
AGCCAGGCTCACCTCTCATGCCTGACAAAGCCCAAAGGAAGCAAGTCAGGTCCCGGCATG



GTAGGGGTGGTAGGGGTGGAGGATAGGCAGGGGTGAGGTAGGGAAGAACATCAGCCACCG  
GCCTCTTTCACAGGACTGCAGGAAGGAGTCCTGGCCGTGGAGTGGGGAAGGGC

>1358 len=235 tot-seq=15

CTAGGGGGGTAAAGGGCACGCAGGCGGTTTTTTAAGTGAGGTGTGAAAGCCCCGGGCTTA  
ACCTGGGAATTGCATTTACAGACTGGGTAAGTACTTTAGGGAGGGGTAGAATTCCA  
CGTGTAGCGGTGAAATGCGTAGAGATGTGGAGGAATACCGAAGGCGAAGGCAGCCCCTTG  
GGAATGACTGACGCTCATGTGCGAAAGCGTGGGGAGCAAACAGGATTAGAAACC

>1359 len=210 tot-seq=15

AGGGAATAGGTTAAAATGAGCAGCGGCAGGGAGGTGAGAAGGGGCTCGTGGGGTGGACCA  
CATGAGCTTGATTAGGATGAAGTAAGGGAGACATGAAGAAAAGGAGGTGAGGTTGAGAGA  
GCTGAATGTGGAGAGGTAATGGAGGACGATGGGGACTAGGCTGAGGGATTTAGTTCCCA  
GTCAGGGGAGCTATACCTGAATCAAAGTGA

>1360 len=142 tot-seq=15

TGGGGAATATTGCACAATGGGCGCAAGCCTGATGCAGCGACGCCGCGTGGGGGATGAAGG  
CCTTCGGGTTGTAAACTCCTTCGCTATCGACGAAGCCTTCGGGTGACGGTAGGTAGATA  
AGAAGCACCGGCTAACTACGTG

>1361 len=156 tot-seq=15

TGAGGAATATTGGTCAATGGACGAGAGTCTGAACCAGCCAAGTCGCGTGAAGGATGACTG  
CCCTATGGGTTGTAAACTTCTTTTATTGGGGAATAAAAAAGAGGACGTGTCCTTTATTGT  
ATGTACCTAAATGAATAAGCATCGGCTAACTCCGTG

>1362 len=154 tot-seq=15

TGAGGAATATTGGTCAATGGGCGAGAGCCTGAACCAGCCAAGTAGCGTGCAGGAAGACGG  
CCCTATGGGTTGTAAACTGCTTTTATAGGGGAATAAAGTGGACTACGTGTAGTTTATTGT  
ATGTACCCTATGAATAAGGACCGGCTAATCCGT

>1363 len=160 tot-seq=15

CTAAGAATATTCCGCAATGGGGGAACCCTGACGGAGCGACGCCGCGTGGGCGAGGAAGG  
CCGGAAGGTTGTAAAGCCCTTTTGCAGCGAGGAATAAGGGGAGGAGGGAATGCCTTCCC  
GGTACTGTAGCGCGCAATAAGCGCCGGCTAATTACGTG

>1364 len=179 tot-seq=15

GGGACACAGAGAGCAGAGAGGAGTAAACTGGGCACCAGCCCATCTGGGCTCAGCATGAA  
GCCAGGAGACTCTCTCAATGTGGGAAAGGGTGAGTAAGTGAAAGCCACCAGGGGGATTT  
ACGGTCTCTACCTGTGCAAACTGGGAATGGGAGAATCCCCCTGGCTAGAGCTTCTGGC

>1365 len=157 tot-seq=15

TGAGGAATATTGGTCAATGGACGCAAGTCTGAACCAGCCAAGTAGCGTGCAGGATGACGG  
CCCTCCGGGTTGTAACTGCTTTTAGTTGGGAATAAAAGGGGGCTCGTGAGCCCCGTATT  
GTATGTACCATCAGAAAAAGGACCGGCTAATTCCGTG

>1366 len=215 tot-seq=15

TAGGGAATTTTCGTCAATGGGCGCAAGCCTGAACGAGCGATGCCGCGTGAGTGAAGAAGG  
CCTTCGGGTCGTAAAGCTCTGTTGCGGGGGAAAAAAGGCAGCATCAGGAAATGGGTGCTG  
ACTGATGGTGCCCCGCCAGAAAGTCACGGCTAACTACGTGCCAGCAGCCGCGGTAATTGG  
AGATCGGAAGAGCGTCGTGTAGGGGAAGAGAGTG

>1367 len=136 tot-seq=15

TAGGGAATTTTTCGCAATGGGGGAAACCTGACGCAGCGACGCCGCGTGAGCGAAGAAGT  
ATTCGGTATGTAAAGCTCTATCAGCAGGGAAGAAGAATGACGGTACCTGACTAAGAAGC  
ACCGGCTAAATACGTG

>1368 len=160 tot-seq=15

TAGGGAATCTTCGGCAATGGGGGAAACCTGACCGAGCAACGCCGCGTGAGTGAAGAAGG  
CCTTCGGGTTGTAAAGTACTTTTCAGCGGGGAGGAAGGGAGTAAAGTTAATACCTTTGCTC  
ATTGACGTTACCCGCAGAAGAAGCACCGGCTAACTCCGTG

>1369 len=229 tot-seq=15

AGAGCTGAGTGCAACGTCCAAGCCCCTGGGGTAGTGGCTCCCACTTACCTGCACCAC  
AGCCTCAAGTCTCTGATGCTTATCCTGCGTGACAGGGCAGCAGACAGGGCATGGGGAA  
CACAGCCACCAGGTCACACACCAGCAAGGGGACAGCCAAGGCTCAACCCTGGGGGGCTGC  
AGGCTCTGCCAGCTCACTCCAGGGCCACTGTACAGTGTGGGGACAGA

>1370 len=161 tot-seq=15

TGGGGAATATTGCGCAATGGGGGAAACCTGACGCAGCGACGCCGCGTGCGGGATGAAGG  
CCTTCGGGTTGTAAACTCTGTTATACGGGACGAAAAAGACGGATGCCAACAGTATCCGT  
CCGTGACGGTACCGTAAGAGAAAGCCACGGCTAACTACGTG

>1371 len=155 tot-seq=15

TGAGGAATATTGGTCAATGGGCGAGAGCCTGAACCAGCCAAGTAGCGTGCAGGATGACGG  
CCCTATGGGTTGTAAACTGCTTTTATATGGGAATAAAGTGAGGGACGTGTCCCTTATTGC  
ATGTACCATATGAATAAGGACCGGCTAATTCCGTG

>1372 len=102 tot-seq=14

CATTATTTCCCCTTGTTTTGCCTCTCCTTATCCTCAGTAACGTCATCCTGTTCCCCTG  
GGAACAACAGCAGGCCTTCATCTCCTGGCTCAGGACTCCACG

>1373 len=132 tot-seq=14

TCAAGAAAACTTTCTGAGGATAAACAGCCTCTTTTCTGTATTTAACAAACAGAAAATAC  
GAACCAAAATAAAGCAAAGGAAACATCCTCCAATAAGCAACCCTACATTTGAAATC  
AATTCACCACCA

>1374 len=135 tot-seq=14

TGGGGAATATTGCACAATGGGGGAAACCCTGATGCAGCGACGCCGCGTGAGTGAAGAAGC  
GCCTCGGCGCGTAAAGCTCTGTCAGCAGGAACGACGATGACGGTACCTGAAGAAGAAGCC  
CCGGCTAACTACGTG

>1375 len=135 tot-seq=14

TGGGGAATCTTCGCAATGGACGAAAGTCTGACGGAGCAACGCCGCGTGAGCGAAGAAGG  
CTTTGAGTCGTAAAGCTCTGTCCTATGAGAAGATAATGACGGTATCATAGGAGGAAGCC  
CTGGCTAAATACGTG

>1376 len=136 tot-seq=14

TGGGGAATATTGGGCAATGGAGGAACTCTGACCCAGCAATGCCGCGTGAACGATGAAGG  
TCTTTGATTGTAAAGTTCTTTAGTTTGCTAGGAAATAAATGACCAGCAAAGAATAAGC  
CCCGGCTAACTACGTG

>1377 len=136 tot-seq=14

TGGGGAATATTGCACAATGGGCGCAAGCCTGATGCAGCAACGCCGCGTGGAGGAAGACGG  
TTTTCGGATTGTAACTCCTGTTCTTAGTGAAGAAAATGACGGTAGCTAAGGAGCAAGC  
CACGGCTAACTACGTG

>1378 len=136 tot-seq=14

TGGGGGATATTGCACAATGGGGGAAACCCTGATGCAGCGATGCCGCGTGGAGGAAGAAGG

TTTTCGGATTGTAACTCCTGTCGTAAGGGAAGAGGAAGGACTGTACCTTACAAGAAAGC  
TCCGGCTAACTACGTG

>1379 len=138 tot-seq=14

TGGGGAATATTGGGCAATGGGCGCAAGCCTGACCCAGCAACGCCGCGTGAAGGAAGAAGG  
CTTTCGGGTTGTAACTTCTTTTCTCAGGGACGAAGGAAGTGACGGTACCTGAGGAACAA  
GCCACGGCTAACTACGTG

>1380 len=138 tot-seq=14

TGGGGAATATTGGGCAATGGGCGCAAGCCTGACCCAGCAACGCCGCGTGAAGGAAGACGG  
TCTTCGGATTGTAACTTCTTTAGACAGGGACGAAACAAATGACGGTACCTGTAGAATAA  
GCCACGGCTAACTACGTG

>1381 len=138 tot-seq=14

TGGGGGATATTGCACAATGGGGGGAACCCTGATGCAGCGACGCCGCGTGAGTGAAGAAGT  
ATCTCGGTATGTAAAGCTCTATCGGCAGGGAAGAAAAAATGACAGTACCTGACTAAGAA  
GCCCCGGCTAACTACGTG

>1382 len=138 tot-seq=14

TGGGGAATATTGCACAATGGGGGAAACCCTGATGCAGCAACGCCGCGTGAAGGAAGAAGG  
CCTTTGGGTCGTAACTTCTGTTCTGAGGGAAGAAGAAAGTGACGGTACCTCAGGAGAAA  
GCCCCGGCTAACTACGTG

>1383 len=140 tot-seq=14

TGGGGAATATTGCACAATGGGCGAAAAGCCTGATGCAGCGACGCCGCGTGAGGGATGACGG  
CCTTCGGGTTGTAAACCTCTTTCAGCTCCGAAGAAGCGAAAGTGACGGTAGGAGCAGAAG  
AAGCACCGGCTAACTACGTG

>1384 len=143 tot-seq=14

TGGGGAATATTGCACAATGGGCGCAAGCCTGATGCAGCGACGCCGCGTGGGGGATGACGG  
CCTTCGGGTTGTAACTCCTTTCAGCCATGACGAAGCCTTTGTGGTGACGGTAGTGGTAG  
AAGAAGCACCGGCTAACTACGTG

>1385 len=154 tot-seq=14

TAGGGAATATTGGGCAATGGCCGAGAGGCTGACCCAGCCATGCCGCGTGACAGGAAGAAGG  
CCTTCTGGGTTGTAACTGCTTTTACCAGGGAAGAAAACGCGCCTGCGGGCGTAACTGAC

GGTACCTGGTGAATAAGCACCGGCTAACTCCGTG

>1386 len=155 tot-seq=14

TGAGGAATATTGGTCAATGGACGCAAGTCTGAACCAGCCATGCCGCGTGCAGGAAGACGG  
CTCTATGAGTTGTAACTGCTTTTGTACAAGGGTAAACCCTGGGACGCGTCCCAGGCTGA  
AAGTACTGTACGAATAAGGATCGGCTAACTCCGTG

>1387 len=155 tot-seq=14

TAAGGAATATTGGTCAATGGAGGCAACTCTGAACCAGCCATGCCGCGTGCAGGAAGACAG  
CCCTCTGGGTCGTAACTGCTTTTATTCGGGAATAAACCTCATTACGTGTAATGAGCTGA  
ATGTACCGAAGGAATAAGGATCGGCTAACTCCGTG

>1388 len=155 tot-seq=14

TGAGGAATATTGGTCAATGGGCGCAAGCCTGAACCAGCCATGCCGCGTGCAGGAAGACGG  
CTCTATGAGTTGTAACTGCTTTTGTACTAGGGTAATTTGCGGTACGTGTACCGTATTGA  
AAGTATAGTACGAATAAGGATCGGCTAACTCCGTG

>1389 len=160 tot-seq=14

TGGGGAATATTGCACAATGGGGGAAACCCTGATGCAGCGACGCCGCGTGAGTGAAGAAGG  
TTTTCGGATCGTAAACTCTGTTGTAAGAGAAGAACAATTGTAGAGTAACTGCTACAGT  
CTTGACGGTATCTTACCAGAAAGCCACGGCTAACTACGTG

>1390 len=160 tot-seq=14

TAGGGAATCTTCCGCAATGGACGCAAGTCTGACGGAGCAACGCCGCGTGTGTGAAGAAGG  
TTTTCGGATCGTAAAGCACTGTTATTAGCCAAGAACACCCCTAGTAGTAACTGGCTAGGG  
ATTGACGGTAACTAATCAGAAAGCCACGGCTAACTACGTG

>1391 len=160 tot-seq=14

TTAGGAATATTCGTCAATGGGGGAAACCCTGAACGAGCAATGCCGCGTGCAGTGAAGAAGG  
TCTTTGGATTGTAAACTCTGTTGTATGGAAAAACGGCTAGGTTAGGAAATGAACTTAG  
TGTGATGGTACCATAACCAGAAAGCCCCGGCTAACTACGTG

>1392 len=160 tot-seq=14

TGGGGAATTTTGGACAATGGGGGCAACCCTGATCCAGCCATTCCGCGTGCAGTGAAGAAGG  
CCTTCGGGTTGTAAAGCTCTTTCAGCTGGAACGAAACGGTCCGCTCTAACATAGCGGGCT  
AATGACGGTACCAGCAGAAGAAGCACCGGCTAACTACGTG

>1393 len=160 tot-seq=14

TGGGGAATATTGGACAATGGGCGCAAGCCTGATCCAGCCATACCGCGTGGGTGAAGAAGG  
TCTTCGGATTGTAAAGCACTTTAAGTTGGGAGGAAGGGCATTAACTAATACGTTGGTGT  
CTTGACGTTACCGACAGAATAAGCACCGGCTAACTCTGTG

>1394 len=173 tot-seq=14

GAGCAGAGATTGAGGAAATGGCTGACCAATGACTGGCCCACTTGGGACTTATCCCAATT  
AGAGAGAGACATCTCCTGACATTATTAATAAGACTCTGCTATGCTTGCAGACAGGAGCCT  
AGCATAACTGTCTTCTACGAGGCTTACATAACTGTCTTCTACGAGGCTTAC

>1395 len=176 tot-seq=14

GAGGACCCCAGGCTTCTGGACCAAGATGACTTAGCTTTAAATCCTAGCAAGAAATCTTAC  
TAGGTCCATGACTACGGTGGTGTAAAATGTGTCCATGCATTCTTAACTTCTTCAA  
AAGTTAAACTTAGTTCTCCTTCTTTGGGTGTCTGCTGGATTTAGTGATCCACTT

>1396 len=183 tot-seq=14

GAAAATGAAGTGGACAATGTGGGGTCTTAGTTGTATTTTGTAGTGTGCTAGTTTT  
GTGCTGGTTTGCCTCCAGCCTGGAGGTGGTACTTTCAATAGAGGGTCTTAGTTGTATT  
TTTGTAGTGTGCTCGTTTTGTGCTGGTTTGCCTCCAGCCTGGAGGTGGTACTTTCAAT  
AGA

>1397 len=198 tot-seq=14

TGAGGAATATTGGTCAATGGGCGGAAGCCTGAACCAGCCATGCCGCGTGAAGGACTAAGG  
CCCTACGGGTCGTAACTTCTTTAGACGCAGAGCAATAAGGTCCACGTGTGGACCGATGA  
GAGTATGCGTAGAATAAGCATCGGCTAACTCCGTGCCAGCAGCCGGGTAATACCAAGATC  
GGAAGAGCGTCGTGTATG

>1398 len=199 tot-seq=14

TGAGGAATATTGGTCAATGGTTCGAGAGACTGAACCAGCCAAGTCGCGTGAAGGAAGACGG  
CTCTATGAGTTGTAACTTCTTTGTACAGGAGTAAAGTGAGACACGCGTGTATTATTGC  
AAGTACTGTACGAATAAGCATCGGCTAACTCCGTGGGGGAGCCGGGTAATACCGAGATC  
GGAAGAGCGTCGTGTAGGG

>1399 len=206 tot-seq=14

CACAAGCACAGAGTTGTGGGAAAGATGGAAGCAAGGTCAGGAGAGGAACCAAGAGAAACA

GCAACATTTTCAGGTGAGGGTGGAAAAGGATCATCAAAAAGACAGAGTGAGAGAGCGTGGT  
CAGAGAGGTGGCAGATGACCCCGAGAGAGTGACATCATGAAGCCAAGGGAAGTAAGGAC  
TGTGGTTGTCGCAGGAGAGATGGTGC

>1400 len=208 tot-seq=14

TGGGGGATATTGCACAATGGGCGAAAGCCTGATGCAGCGACGCCCGTGAGGGATGAAGG  
CTTTCGGGTTGTAAACCTCTTTCAGTACGGAAGAAGGCCATTGTTGAGATGGTGGACGGT  
ACGTGCAGAAGAAGCGCCGGCTAACTACGTGCCAGCACCCGCGTAATAGTGAGATCGGAA  
GAGCGTCGTGTAGGGACAGAGTGTGCCA

>1401 len=214 tot-seq=14

ATGCTGAAGAGAACTGAATCTGATGATCAGGGTCTCAGAATGGAGGGCAGACAAGCTCGA  
GAGCCATGGCTAGAGGAGAGAGTATCTAGAGAGAAATAGAAACTGACAAGAGAATCAAAG  
AGCCTGCTTCTCCTGCTAATGCATGGCTGCCCTTGGGTTTCTCCCTCTAGCCGGTGGTGT  
TGGGAATGAGCCCTACCTAAGCCTTCATGCACAG

>1402 len=217 tot-seq=14

TGGGGAATATTGCGCAATGGGGGAAACCCTGACGCAGCGACGCCCGTGAGTGAAGAAGG  
ATTTTCGGTTCGTAAACTCTGTTGTTAGAGAAGAACAGCGCATAGAGTAACTGTTATGCG  
TGTGACGGTATCTAACCAGAAAGCCACGGCTAACTACGTGGGGGGAGCCGCGGTATACGT  
AGATCGGAAGAGCGTCGTGTAGGGAAAGAGTGGGGAA

>1403 len=228 tot-seq=14

GCATACGAGATTTGACGGTGACTGGAGTTAAGACGTGTGATATTAAGATATAATAAGGGA  
GGAAGAAGTAGGGAATATTAATAAATGGAAGAAAGTATGATGGAGAAAAGAAGAGTGAGT  
GAAGAAGGGTTTAGGATAGTAAAGATATGTTGTTGGTGAAGAAGGACAGGGGTAGTAACT  
GACCTTTGTTTGACGGTAATCAATTAGAAAGTCACGGCTAACTACGTG

>1404 len=230 tot-seq=14

TAAAGGGGACGCAGCCTATCTGTGAGGAGCGGCGCGAGTCGGCTCAGCCACTGCGCAT  
GCGCGAGGTGAGAGCGGTTTCTCCCGTCACAGTGGTCCACGGTTGTCTTAGAAACCAG  
TCCCCGAGGCTTGGCAGAGCAGGAGCCCTCTGTGGCAGTGCTTGGGTGTCGACGCTCTGC  
GGCTCCGGCCTCACCTCTCCATGGGGTTCGAAGGGAACGTCTCCGGATGTG

>1405 len=236 tot-seq=14

ACCATTTGGAGTTCAGACGTGTGCTCTTCCGATCTCTACGGGAGGCGGGGGGATTA  
AATGAGGATCCAAATGGGAAAGGTGCCACCCATTGATCGCAGCATAAGAGATTAAGGCT  
TCAATGAGCAGCAAGAAGATTCTGTAACAGAAAATGGTTGCAGAGCATGAGCTTAGGCC  
TGAAGATATCTATAATCAGTGACAGCCAGGCATAGACAGACAGGGCACCATTTGCC  
>1406 len=161 tot-seq=14

TGGGGAATCTCCGCAATGGACGCAAGTCTGACGGAGCAACGCCGCGTGAGGGAGGAAGT  
TTTTCGGAACGTAAACCTCTGTTGTTTCATGACGAACGAGCTTTTTATCAACAACGAAGAG  
CAGTGACGGTAGTGAACGAGGAAGCCACGGCTAACTACGTG  
>1407 len=159 tot-seq=14

TGGGGAATATTGGACAATGGGGGAAACCCTGATCCAGCAATGCCGCGTGTGTGAAGAAGG  
CCTTCGGGTTGTAAAGCACTTTCAGTAGGGAGGAAAGGTGCGTAGTTAATACCTGCGCAA  
TTGACGTTACCTACAGAAGAAGCACCGGCTAACTCCGTG  
>1408 len=155 tot-seq=14

TGAGGAATATTGGTCAATGGCCGAGAGGCTGAACCAGCCAAGTCGCGTGAGGGAAGAATG  
TCCTAAGGATTGTAAACCTCTTTTGTCTGGGGAGCAAAAAGGCTCTGCGGAGTCGTATTGA  
GAGTACCCGAAGAAAAGCATCGGCTAACTCCGTG  
>1409 len=155 tot-seq=14

TGGGGAATATTGCGCAATGGGGGAAACCCTGACGCAGCGACGCCGCGTGCGGGATGACGG  
CCCTATGGGTTGTAAACTGCTTTTATATGGGGATAAAGTGGGGAACGTGTTCCCTTTTGC  
AGGTACCATATGAATAAGGACCGGCTAATTCCGTG  
>1410 len=137 tot-seq=14

TGGGGGATATTGGACAATGGGGGAAACCCTGATCCAGCGACGCCGCGTGAGTGAAGAAGT  
ATCTCGGTATGTAAAGCTCTGTCAGCAGGGAAGAATTTATGACGGTACCTGACCAAGAAG  
CCCCGGCTAACTACGTG  
>1411 len=160 tot-seq=14

TGGGGAATTTTTCGCAATGGGCGCAAGCCTGACGAAGCAACGCCGCGTGGAGGATGAAGG  
TCTTCGGATTGTAAACTCCTGTCGACCGGGACGAATGCACTCGGCCTAATACGTCGGAAT  
GTTGACGGTACCGGTGGAGGAAGCCACGGCTAACTCTGTG  
>1412 len=198 tot-seq=14



TCTTTCTCTTTCTCTCTCTCTTTTTCTTTTTTTTTTAAGGTGGGGAAAGAGACAACCAAG  
AGACAGGAAGCTGATCTGCAAGGATTCGGAGTTGTGCTAAAAGGACTTTGATTTTTTTTC  
CCCCTTTACGAACGCTGGCAATTGACATCACTACAGACAGCCTGGTTAGAGAACAACCTG  
CCTCATCCCAAGTGGACC

>1413 len=135 tot-seq=14

TGGGGGATATTGCACAATGGAGGAAACTCTGATGCAGCGACGCCGCGTGAGGGAAGACGG  
TCTTCGGATTGTAAACCTCTGTCTTTGGGGAAGAAAATGACGGTACCCAAGAGGAAGCT  
CCGGCTAACTACGTG

>1414 len=155 tot-seq=14

TGAGGAATATTGGTCAATGGACGGAAGTCTGAACCAGCCAAGTAGCGTGCAGGAAGACGG  
CCCTATGGGTTGTAAACTGCTTTTATGTGGGGATAAAGTGAGGGACGTGTCCCTTATTGC  
AGGTACCACATGAATAAGGACCGGCTAATTCCGTG

>1415 len=128 tot-seq=14

CAGTTCAGCAGTAGCGGGGAGCACAGTGGTGGCAGTGATCATGAGGCTGGGGAACCAAGT  
CAGGGGGAACCAACCAGTACCTTTTGTACTGATAGCAAGGAGGGAGGGGACCCAGAAGA  
CCCCATGT

>1416 len=217 tot-seq=14

GTTTGTGGGGGGTGAACAATTGGAGATCACTTTTGAACAGGCTGATTTTTAGATCATT  
GACATCAAGGAGAAAGTTAGACATATGAGCCTAGAGCTCAAGAAAGAGACCTGGGCTGGA  
AATGTAAATTTGAAGTTGTCAGAGTAGAGATTATTTAAAACCATGACGCTGAATGCA  
ATCACGAAATGAGCTAAATAGAGACAGAAGAGAGGAA

>1417 len=155 tot-seq=14

TGGGGAATCTTGCACAATGGGCGAAAGCCTGATGCAGCGACGCCGCGTGCGGGATGACGG  
CCCTATGGGTTGTAAACTGCTTTTGTGGGAATAATCGACATTACGTGTAATGTTTTGC  
ATGTACCATTGAATAAGGACCGGCTAATTCCGTG

>1418 len=136 tot-seq=14

TGGGGGATATTGCACAATGGGGGGAACCCTGATGCAGCGACGCCGCGTGGGCGAGGGAGC  
GCCTCGGCGCGTAAAGCCCTTCGGCGGGGGAGAACGATGACGGTACCCGACGAAGAAGC  
ACCGGCTAAATACGTG

>1419 len=225 tot-seq=14

TGGTCACGGTGTAGTGGACAGAGGCTGGGAGTAAAGAGACCAGTCAGGGGGCTGCTGTAA  
TATTTCCGGTGAAAGCTGCTGAGGGGTGAATGAATAGTGGCAGAGGTAGGAAAAATAAT  
GAAAACATTGGCATGGAGGTGACATTGGCAAGATGAGGGTGGGAACTAGCAAAGAGGTGA  
GAAGGAAGGCCAGTGGGACCCCCGGGAGACCAATGTTTCTAAAG

>1420 len=155 tot-seq=14

TGAGGAATATTGGTCAATGGGCGAGAGCCTGAACCAGCCAAGTAGCGTGCAGGAAGACGG  
CCCTATGGGTTGTAAACTGCTTTTGTGGGAATAATCGACATTACGTGTAATGTTTTGC  
ATGTACCATTGAATAAGGACCGGCTAATCCGTG

>1421 len=161 tot-seq=14

TGGGGAATATTGCGCAATGGGGGAAACCCTGACGCAGCAACGCCCGTGAGTGAAGAAGG  
TTTTCGGATCGTAAACTCTGTTGGTAGAGAAGAACGTTGGTGAGAGTGGAAAGCTCATC  
AAGTGACGGTAACTACCCAGAAAGGGACGGCTAACTACGTG

>1422 len=156 tot-seq=14

CAGTCTCTCCCTGAAGCCTGGGTCAGGGAGAGGAAGCAGGGAGGAGGCTGTGAGCAAGG  
GACGCCCAAGGTGTGGGAGGCAGGGGGAGGCTCTTTGTGTAAGGGTGCCCAAGTTCAAGG  
ACAAGTGTGAGCATGCAGGAGAGGGGGACAGGAGTG

>1423 len=153 tot-seq=14

TGGGGGATTTTGCACAATGGGCGCAAGCCTGATGCAGCGACGCCCGTGAGGGATGAAGG  
CCTTCGGGTTGTAAACCTCTTTCGCTGGGTTGAAAGGCCATGCTTTGGGTGTGGTTGATT  
TGAAGTGGTAAAGAAGTACCGGCTAACTACGTG

>1424 len=138 tot-seq=14

TGGGGAATATTGGGCAATGGGCGCAAGCCTGACCCAGCAACGCCCGTGAAAGGAAGAAGG  
TTTTCGGATTGTAAACTTCTGTCCTCAGGGAAGAAACAAATGACGGTACCTGAGGAGGAA  
GCCCCGGCTAACTACGTG

>1425 len=205 tot-seq=14

TGGGGAATATTGCGCAATGGGGGCAACCCTGACCGAGCAACGCCCGTGAGTGAAGAAGG  
TTTTCGGATCGTAAAGCTCTGTTGTAAGAGAAGAACGTGTGTGAGAGTGGAAAGTTCACA  
CAGTGACGGTAACTTACCAGAAAGGGACGGCTAACTACGTGGGGGGAGCCGGGTAATGCG

GAGATCGGAAGAGCGTCGTGTTGGG

>1426 len=104 tot-seq=13

CTCTTGTGGGAGCTCTCTTGCACGCAGGAGTGGGCAGCCAGTGGGTCTGAGGGTGCCACA  
GGTCAGGCTCTCAGGTCTGTGCCACTGGAGGGTGGGACTTCCTA

>1427 len=107 tot-seq=13

ATATCTTGGCTTGGCTGTCATACTGGAGATGGGTCTGAGTGGGCTCAGGGGTCCGCCTC  
TACCTCAGAGCTTGGCAGGCACTGAGGAAGAAGGGTCTGGGGGAAAT

>1428 len=110 tot-seq=13

CATCTGAGGGTTTTGACTATGAATTTGAAGTAGGAGAGCCACCTGGCAGGTCTGGAGCAT  
CTGTGATGCCATTTTCTGCCCCAGCTTTGTAGGAGTGAGGGGAGGAGC

>1429 len=133 tot-seq=13

ACAGAGCAGATATAACAATGTATATTTACTTGTGTGTGAGTTGGCAGTAAAGTACAACAAA  
GGCTGCCAGTGGCTAACAGTGCAAACTAGAACCACTAACCTGCATTTTACTGTAGTG  
GGCCATGTCCCTT

>1430 len=135 tot-seq=13

TGGGGAATATTGGACAATGGGCGAAAGCCTGATCCAGCAATGCCGCGTGAGTGATGAAGG  
CCTTAGGGTTGTAAAGCTCTTTTACCAGGGAAGATGATGACTGTACCTGGAGAATAAGCC  
CCGGCTAACTCCGTG

>1431 len=135 tot-seq=13

CGACGAATATTCCGCAATGGGCGCAAGCCTGACGGAGCGACGCCGCGTGACAGGATGAAGC  
GGCTCTGCCGTGTAAACTGCTGTCAGGGTACAGAAACATTGATCATAACCAAAGGAAGGG  
CCTGCTAATCTCGTG

>1432 len=135 tot-seq=13

TGGGGAATATTGCACAATGGGGGAAACCCTGATGCAGCGACGCCGCGTGAACGAAGAAGT  
ATTTCCGGTATGTAAAGTTCTATCAGCAGGGAAGATAATGACGGTACCTGACTAAGAAGCA  
CCGGCTAAATACGTG

>1433 len=135 tot-seq=13

TGGGGAATATTGCACAATGGGCGAAAGCCTGATGCAGCAACGCCGCGTGAAGGAAGAAGG  
CCTTCGGGTCGTAAACTTCTGTCCTTGGGGAAAGATAATGACGGTACCCTTGGAGGAAGCC

CCGGCTAACTACGTG

>1434 len=135 tot-seq=13

CGGGGAATATTGCACAATGTGGGAAACCCTGATGCAGCGACGCCGCGTGAGTGAAGAAGT  
ATCTCGGTACGTAAAGCTCTATCAGCAGGGAAGAAAATGACGGTACCTGACTAAGAAGCC  
CCGGCTAACTACGTG

>1435 len=137 tot-seq=13

TGGGGGATATTGCACAATGGGGGAAACCCTGATGCAGCGACGCCGCGTGGGTGAAGGAGT  
ACTCCGGTATGTAAAGCCCTATCGGCAGGGAAGAAAAAAGGACGGTACCTGACTAAGAAG  
CCCCGGCTAACTACGTG

>1436 len=138 tot-seq=13

TGGGGAATATTGGGCAATGGAGGCAACTCTGACCCAGCAACGCCGCGTGAATGAAGAAGG  
TCTTCGGATTGTAAAGTTCTTTAGCGAGGGACGAAAAGAATGACGGTACCTCGAGAATAA  
GCCACGACTAACTACGTG

>1437 len=138 tot-seq=13

TGGGGAATATTGGGCAATGGGGGAAACCCTGACCCAGCAACGCCGCGTGAAGGAAGAAGG  
CCTTCGGGTTGTAAACTTCTTTTAGTAGGGACGAAGAATGTGACGGTACCTACAGAAAAA  
GCAACGGCTAACTACGTG

>1438 len=140 tot-seq=13

TGGGGAATATTGCACAATGGGGGAAACCCTGATGCAGCAACGCCGCGTGCGGGATGACGG  
CCTTCGGGTTGTAAACCGCTTTCAGCCATGACGAAGCTTTTGTGACGGTAGTGGCAGAAG  
AAGCACCGGCTAACTACGTG

>1439 len=140 tot-seq=13

TGGGGAATATTGGACAATGGGCGAAAGCCTGATCCAGCAACGCCGCGTGAGGGATGACGG  
CCTTCGGGTTGTAAACCTCTTTCAGCAGGGACGAAGCGCAAGTGACGGTACCTGCAGAAG  
AAGCACCGGCCAACTACGTG

>1440 len=140 tot-seq=13

TGGGGAATATTGGACAATGGGCGAAAGCCTGATCCAGCAACGCCGCGTGAGGGATGACGG  
CCTTCGGGTTGTAAACCTCTTTCACCTGTGACGAAGCGAAAGTGACGGTAGCAGGAGAAG  
AAGCACCGGCCAACTACGTG

>1441 len=143 tot-seq=13

TAGGGAATCTTCGGCAATGGACGGAAGTCTGACCGAGCAACGCCGCGTGAGTGAAGAAGG  
TTTTCGGGTTGTAAACCGCTTTTATTGGGAGCAAGCCTTCGGGTGAGTGTACCTTTTGA  
ATAAGCGCCGGCTAACTACGTGG

>1442 len=150 tot-seq=13

CTCTGCCAGAGCCAAGGGTGGAAACAGCACAAGACGACATCAGCAAACCTGGTGACCTA  
ACTGTGGGCTGCTATGGAGTCTGGGATGGACTGGAGTTCCTCCTGCTCCAGGCCTCGGGA  
GACAAAATCCACAAAGAGAGACCCAGTGGC

>1443 len=155 tot-seq=13

TGAGGAATATTGGTCAATGGGCGAAAGCCTGAACCAGCCAAGTAGCGTGAAGGATGACTG  
CCCTATGGGTTGTAAACTTCTTTTATATGGGAATAAAACCACTTACGTGTAAGTGTCTGT  
ATGTACCATATGAATAAGCATCGGCTAACTCCGTG

>1444 len=155 tot-seq=13

TGAGGAATATTGGACAATGGGTGCAAGCCTGATCCAGCCATCCCGCGTGAAGGATTAAGG  
TCCTATGGATTGTAAACTTCTTTTATACAGGGATAAACCTCTCCACGTGTGGAGAGCTGA  
AGGTACTGTATGAATAAGCACCGGCTAACTCCGTG

>1445 len=155 tot-seq=13

TGAGGAATATTGGTCAATGGGCGAGAGCCTGAACCAGCCAAGTAGCGTGCAGGATGACGG  
CCCTCCGGGTTGTAAACTGCTTTTAGTTGGGAATAAAAAAAGGGACTTGTCCCTTCTGT  
ATGTACCTCAGAAAAAGGACCGGCTAATTCCGTG

>1446 len=156 tot-seq=13

TGGGGGATTTTGCACAATGGGCGCAAGCCTGATGCAGCGACGCCGCGTGAGGGATGGAGG  
CCTTCGGGTTGTGAACCTCTGTGCGCCGGTGTAGGCTCTGCTTTGTGGGTGGGGTTGA  
CGGTAGCCGGGGTATGAAGTGCCGGCTAACTACGTG

>1447 len=159 tot-seq=13

TGGGGAATATTGGACAATGGGCGAAAGCCTGATCCAGCCATGCCGCGTGAGTGATGAAGG  
CCCTCGGGTCGTAAAGCTCTGTGGAGAGGGAAGAACCCGTTTCAGCATCAGATCCTGAACG  
TTGACGGTACCTCTTTAGCAAGCACCGGCTAACTCCGTG

>1448 len=160 tot-seq=13

TAGGGAATCTTCGGCAATGGACGGAAGTCTGACCGAGCAACGCCGCGTGAGTGAAGAAGG  
ATTCGGTTCGTAAAGCTCTGTTGTTAGGGAAGAATGATTATGTAGTAACTATACATAGT  
AGAGACGGTACCTAACCCAGAAAGCCACGGCTAACTACGTG

>1449 len=160 tot-seq=13

CTAAGAATATTCCGCAATGGAGGAACTCTGACGGAGCGACGCCGCGTGGATGATGAAGG  
TCGGAAGATTGTAAAATCCTTTTAAGTATGATGAATAACCTGATCAGGAAATGGGACAGG  
GATGACCGTAATACTTGAATAAGCAACGGCTAATTACGTG

>1450 len=160 tot-seq=13

TGGGGAATTTTGGACAATGGGCGCAAGCCTGATCCAGCAATGCCGCGTGAGTGAAGAAGG  
CCTTCGGGTTGTAAAGCTCTTTTGTGTCAGGGAAGAAACGGCCTGGGTTAATACCCCGGGCT  
AATGACGGTACCTGAAGAATAAGCACCGGCTAACTACGTG

>1451 len=160 tot-seq=13

TAGGGAATCTTCGCAATGGGCGAAAGCCTGACGGAGCAACGCCGCGTGAGTGAAGAAGG  
TTTTCGGATCGTAAAGCTCTGTTGCCAAGGAAGAACGTCTTCTAGAGTAACTGCTAGGAG  
AGTGACGGTACTTGAGAAGAAAGCCCCGGCTAACTACGTG

>1452 len=161 tot-seq=13

TGGGGAATATTGGACAATGGGCGAAAGCCTGATCCAGCCATGCCGCGTGTGTGAAGAAGG  
CCTTTTGGTTGTAAAGCACTTTAAGCGAGGAGGAGGCTACCGAGATTAATACTCTTGGAT  
AGTGGACGTTACTCGCAGAATAAGCACCGGCTAACTCTGTG

>1453 len=161 tot-seq=13

TGGGGAATATTGGACAATGGGGGGAACCCTGATCCAGCCATGCCGCGTGTGTGAAGAAGG  
CCTTATGGTTGTAAAGCACTTTAAGCGAGGAGGAGGGTACTGGTATTAATACTACCAGCT  
ACTGGACGTTACTCGCAGAATAAGCACCGGCTAACTCTGTG

>1454 len=164 tot-seq=13

AACTAAAAGAAGAGAAGAAAGGATTTGAACAGGGGTCAGATCATTGGTGAAGGGCATT  
TGGTTTCTGTGGCCTGGTCTGAATGTCTCTTATTAAAAATGGAGCAGTACAGATCATT  
GCCCAAAAAGCAAGGAAGAACAGAAGGAGGAGGACAACATGAC

>1455 len=170 tot-seq=13

GGCTGTGAGAGTCTGCTGGCGGCCAGGGAGTCAGGTAAGGTCAGGAAGCGGTAGATGAT

GTTTTGAGGTA CTCCAGATTGGCTCCCTCCCTGCTCTGGTCCCTGATGTTCTTTTCGAT  
GTGGCTCTGCAGGGCTGCAACCTCCTCACGATGCCGTTCCGCCCTCCTCGT

>1456 len=172 tot-seq=13

GGGGTGCCCCCAGGAGTGTGGTGGGCCTGGTGTGGCCCTGTCTGCAGGAAGTGCAGCA  
TGGCCCAGAGGCTCCCAAGCATGGCCTTTCATGGGGACCTTCATGGGGATCGTGGTTCT  
GCGGTTGAGAGGAAGGGGTGAGGAAGGGAGTAAGGATAACATCGTGGTGTGG

>1457 len=183 tot-seq=13

TGGGGAATATTGGACAATGGGCGCAAGCCTGATCCAGCCATACCGCGTGGGTGAAGAAGG  
CCTTCGGGTTGTAAAGCCCTTTTGTGGAAAGAAATCCTATCGGTTAATAACCGGTGGG  
GATGACGGTACCCAAAGAATAAGCACCGGCTAACTTCGTGAATAAGCACCGGCTAACTTC  
GTG

>1458 len=186 tot-seq=13

TGGGGAATATTGCGCAATGGGGGGAACCCTGACGCAGCAACGCCGCGTGATTGAAGAAGG  
CCTTCGGATTGTAAAGATCTTTAATCGGGGACGAAACATGACGGTACCCGAGGAATAAGC  
TCCGGCTAACTACGTGCCAGCACCGCGTAATGAGTAGATCGGAAGAGCGTCGTGTAGGG  
AAAGAG

>1459 len=191 tot-seq=13

CAGGGTTTGAGAGAAATGACTAATTCTGAAAGATGCTCTGCTAAGGGTAAAGTGGTACAA  
AATAGAATTACATGGTACAGAAAAGCCTTTCATGAAAGAAAGAGTCTATTGATTTGACAA  
GCTTCACTGTTGTTTTATTTTACGAAATTGCCACAGCCACTCCAAGTCAACA ACTACC  
ACCCTGAGCAG

>1460 len=193 tot-seq=13

TGAGGAATATTGGTCAATGGGCGAGAGCCTGAACCAGCCAAGTCGCGTGAAGGATGACTG  
CCCTATGGGTTGTAAACTTCTTTTATAGGGGAATAAAAAGGAGAACGTGTTCTCTATTGC  
ATGTACCCTATGAATAAGCATCGGCTAACTCCGTGTGCATGTACCCTATGAATAAGCATC  
GGCTAACTCCGTG

>1461 len=196 tot-seq=13

TGGGGAATATTGGGCAATGGGCGAAAGCCTGACCCAGCAACGCCGCGTGAAGGAAGAAGG  
CCTTCGGGTTGTAAACTTCTTTTACCAGGGACGAAGGACGTGACGGTACCTGGAGAAAAA

GCAACGGCTAACTACGTGTTTACCAGGGACGAAGGACGTGACGGTACCTGGAGAAAAAGC

AACGGCTAACTACGTG

>1462 len=197 tot-seq=13

GGCTTGGACAGAGCCCACGGTCCTCTCCACACCCACGAGTGCTTTCAGTCCATCTCCCCA

AACACACGACCCCTTTAGCAGCACTTTTTCCCTCTGTGGGCAGCCGGGATGGAGCCAATG

GCTCCGAACTTCCACTTGACACTCAACTGGGTGGCAACAGGCAAGAGGCTGTGTGCTTTG

GGAGGAAGAGTTTAAAC

>1463 len=199 tot-seq=13

TGAGGAATATTGGACAATGGGTGGAAGCCTGATCCAGCCATCCCGCGTGCAGGACGACTG

CCCTATGGGTTGTAAACTGCTTTTATATAGGGATAAACCTACTCTCGTGAGAGTAGCTGA

AGGTACTATATGAATAAGCACCGGCTAACTCCGTGAGTAGCTGAAGGTACTATATGAATA

AGCACCGGCTAACTCCGTG

>1464 len=204 tot-seq=13

AAAGGAAGAAGCCGGGATGACAGCGGCGGGGAGCGGGCGACACAGCAATGCCGAGGATTT

CTAGCCACCGCCAGAAGTGAGGAAGATTGAGGAAGAACGAGGAAGGCTTCCCCCGGAGCT

CTCAGAGGGCTCTCCCCGAGGTCCACGGAGGAACGGGCAAGTCCCTGCCAGCCCCGGCCT

GGCCAAGGATACGTCACGATGCCC

>1465 len=222 tot-seq=13

ATGGGCCCAAGTCACAGACAGAAGCCACAGCAGAAAATGGGAAGCATTCTTTATTTTTT

CAGGCTTTTTTTCTTATTTTATTTTAAAGAGAAAAAATGTGACAAAATGGTGAGGATGCT

GGCAGCGCCAGCGTCCCCGGCCTGCACTCTCTCCTGGCCTCCCCTCGGACGTCTTCTGCA

GCCCAAATCTGAACAGCAGTGAAACCGTAAACATGCCCCCA

>1466 len=209 tot-seq=13

TGCAATCCGGCTTTGTTGGGTCCGCATTTTTGCTTTAGTCTGGGGATAGGAATCAAATGT

TACCCAGAGATGTTTGTGTTTTGTTGGGAGTTTTATTCCCTAACTCATTCCCCAAAGCA

CGTGTAAGTCTTATACATATAATCGTGGTACAACAAGGTATATACAGAGAACCCACTTG

GAAATTCAGGCAAAGCTGCATGCACGCTA

>1467 len=143 tot-seq=13

TGGGGAATATTGCACAATGGGCGAAAGCCTGATGCAGCGACGCCGCGTGCGGGATGAAGG



CCTTCGGGTTGTAAACCGCTTTTGATTGGGAGCAAGCCTTTGGGTGAGTGTACCTTTCG  
AATAAGCGCCGGCTAACTACGTG

>1468 len=157 tot-seq=13

TGGGGAATATTGCACAATGGGCGCAAGCCTGATGCAGCGACGCCGCGTGGGGGATGACGG  
CCTTCGGGTTGTAACTCCTTTGTTAGGGACGAAGCCACACCTTTTTTTGGGTGTGGTG  
ACGGTACCTTTGTTAAGAAGCACCGGCTAACTACGTG

>1469 len=156 tot-seq=13

TGAGGAATATTGGTCAATGGGAGAGATCCTGAACCAGCCAAGCCGCGTGAGGGAAGACGG  
CCCTATGGGTTGTAAACCTCTTTTGCCGGGGAGCAAGCTGTGTACGTGTGACACAGCTG  
AGAGTACCCGGAGAAAAAGCATCGGCTAACTCCGTG

>1470 len=160 tot-seq=13

TAGGGAATCTTCCGCAATGGGCGAAAGCCTGACGGAGCAACGCCGCGTGAGTGATGAAGG  
TCTTCGGATCGTAAAGCTCTGTTGTTGGTGAAGAAGGATAGAGGTAGTAACTGGCCTTTA  
TTTGACGGTAATCAACCAGAAAGTCACGGCTAACTACGTG

>1471 len=136 tot-seq=13

TGAGGAATATTGGGCAATGGAGGAACTCTGACCCAGCAACGCCGCGTGAGCGATGAAGG  
TCTTCGGATTGTAAAGCTCTGTGCGAGGGGACGAAGTATGACGGTACCCTGTAAGAAAGC  
CCCGCAAACCTACGTG

>1472 len=145 tot-seq=13

TGGGGAATATTGCACAATGGACGCAAGTCTGATGCAGCGACGCCGCGTGGGGGATGAAGG  
CTTTCGGGTTGTAACTCCTTTCAGTACAGAACAAGGCCTTTTTGGTTGAGGGTATGTGC  
AGAAGAAGCGCCGGCTAACTACGTG

>1473 len=229 tot-seq=13

AGGTGGGGGGCCCCAGTCAGGGCTTGGGCAACGAGGAGCCCCGACCCGCATCACAGATGC  
ACCAAGCCTGCTCGAGGGCAGTGGGAGAAGTGCGGCCCTCAGGATGCCACGTGCTCCAGG  
CCCGAAACCTCTGGCTGGAGGGGCCCTCTGGAAGTGCAGGGAGGACTCTGTAGCCAGGG  
TGGGGCTGGGGGCCGTGGGTGACCCTGGCTCCTCCTTATTCTCTGAGC

>1474 len=160 tot-seq=13

TGGGGAATATTGCACAATGGGGGAAAGCCTGATGGAGCGACACAGCGTGACGATGAAGG

TCTTCGGATTGTAAAGTGCTGTTATAAGGGAAGAACATTTGCAATAGGAAATGATTGCAG  
ACTGACGGTACCTTGTGAGAAAGCGATGGCTAACTATGTG

>1475 len=161 tot-seq=13

TGGGGAATCTCCGCAATGGACGAAAGTCTGACGGAGCAACGCCGCGTGAGTGATGACGG  
TCTTCGGATCGTAAAGCTCTGTTGTTAAGGAAGAACGAGTGTGAGAATGGAAAGTTCATG  
CTGTGACGGTACTTAACCAGAAAGGGACGGCTAACTACGTG

>1476 len=161 tot-seq=13

TGGGGAATATTGCGCAATGGGGGAAACCCTGACGCAGCGACGCCGCGTGCGGGATGAAGG  
CCTTCGGGTTGTAAAGCTCTGTTAATCGGGACGAATGGTTTGTGTGCAAATAGTGCATAG  
ACATGACGGTACCGGAATAGAAAGCCACGGCTAACTACGTG

>1477 len=110 tot-seq=12

CATCCTGATACTAAATCCAGCAGAGAACAATGGTAAAAGAAAACATCAAGCCTGTATCC  
TTGATGAACCTTGATGCAAAAATCTTCAATAAAATACTAGCAAACCTGAAT

>1478 len=125 tot-seq=12

GCAGGACAGTGCCTCACCTTTATCCTGTCAAGCCGTCGCTTTATGGCTCGACTGTTTTTA  
TCTAGCTCCTCTAACATCTTATAGGGGTTGAAGGAAAGCGGTTTCTCGTGGTCCACAAAG  
TTTTC

>1479 len=131 tot-seq=12

TTGGAAACAGTATCACCTTTGGTTCATCACACACTGAACTTAACTTACTCATTGGTCCAT  
GACGGGCCCTTTAAAAGTCTTTATTATTCTGTTGAACATTTTAAAATAATATCATGGAC  
ACCCATGAACC

>1480 len=135 tot-seq=12

TGGGGAATATTGCACAATGGGGGAAACCCTGATGCAGCGACGCCGCGTGAAGGAAGAAGT  
ATTCGGTATGTAACTTCTATCAGCAGGGAAGAAGATGACGGTACCTGAGTAAGAAGCA  
CCGGCTAAATACGTG

>1481 len=135 tot-seq=12

TGGGGGATATTGCACAATGGAGGAAACTCTGATGCAGCAATGCCGCGTGAGGGAAGACGG  
TCTTCGGATTGTAAACCTCTGTCCTTGGTGAAGATGATGACGGTAGCCAAGGAGGAAGCT  
CCGGCTAACTACGTG

>1482 len=135 tot-seq=12

GGGAATATTGGACAATGGGCGCAAGCCTGATCCAGCCATGCCGCGTGAGTGATGAAGGCC  
TTAGGGTTGTAAAGCTCTTTGCCCCGCGAGGATAATGACGGTAGCGGGATAAGAAGCCCC  
GGCTAACTTCGTGTG

>1483 len=135 tot-seq=12

TAGGGAATATTGGACAATGGGGGCAACCCTGATCCAGCAATGCCGCGTGAGTGATGAAGG  
CCTTAGGGTTGTAAAGCTCTTTTACCCGAGATGATAATGACAGTATCGGGAGAATAAGCT  
CCGGCTAACTCCGTG

>1484 len=135 tot-seq=12

TGGGGAATATTGCACAATGGGGGAAACCCTGATGCAGCAACGCCGCGTGAAGGATGAAGG  
CCTTTGGGTCGTAAACTTCTGTCCTTGAGGAAGATAATGACGGTACTCTTGAGGAAGCC  
CCGGCTAACTACGTG

>1485 len=135 tot-seq=12

TGGGGAATATTGCACAATGGAGGAAACTCTGATGCAGCGACGCCGCGTGAACGATGAAGG  
CCTTCGGGTCGTAAAGTTCTGTCCTAGGGGACGATAATGACGGTACCCTAGGAGGAAGCC  
CCGGCTAACTACGTG

>1486 len=135 tot-seq=12

TTCCTGGTACTCACTCCCTCATGCTACCTTAGCCTAGATCAACCCCTCACCTTCTCT  
GTCAGGAGTCAGAGGGAGAGGCCAACCTCCCATGGCAGCTGCCATACTGGCCCCCTTG  
ACCCTGCCTCCTTGA

>1487 len=135 tot-seq=12

TGGGGAATTTTGCACAATGGGGGAAACCCTGACGCAGCAACGCCGCGTGCGGGACGAAGG  
CCCTCGGGTCGTAAACCGCTTTCAGCAGGGAAGACCACGACGGTACCTGCAGAAGAAGCT  
CCGGCTAACTACGTG

>1488 len=135 tot-seq=12

TGGGGAATATTGCACAATGGGGGAAACCCTGATGCAGCGACGCCGCGTGGACGATGAAGC  
ATTCGGTGCGTAAAGTCCTGTCAGCAGGGAAGAAAATGACAGTACCTGACCAAGAAGCC  
CCGGCTAACTACGTG

>1489 len=137 tot-seq=12

GCAGGTCACTGAGTTCAAGGCCAGCCTGGTGTACAGATGGGGTTCAGGACAGCCAAGCT  
TAGGCAGTGAAGGAAACCACTGAAAACAGAAAGCTGGTGAAGATGGATTTGAATGAAGAG  
GCACATTCCAGGCAGGC

>1490 len=137 tot-seq=12

TGGGGAATATTGGGCAATGGGCGCAAGCCTGACCCAGCGACGCCGCGTGAGGGAAGACGG  
TCTTCGGATTGTAAACCTCTTTCAGCAGGGAAGACAAAAGGACGGTACCTGCAGAAGAAG  
CCACGGCTAACTACGTG

>1491 len=140 tot-seq=12

TGGGGAATATTGCGCAATGGGGGAAACCCTGACGCAGCGACGCCGCGTGCGGGATGACGG  
CCTTCGGGTTGTAAACCGCTTTCGCTGTGACGAAGCGTGAGTGACGGTAATGGGTAAAG  
AAGCACCGGCTAACTACGTG

>1492 len=140 tot-seq=12

TAGGGAATCTCCACAATGGACGCAAGTCTGATGGAGCAACGCCGCGTGAGGGATGGAGG  
CCTTCGGGTTGTAAACCTCTTTTATCGGGGAGCAAGCGAGAGTGAGTTTACCCGTTGAAT  
AAGCACCGGCTAACTACGTG

>1493 len=140 tot-seq=12

TGGGGAATATTGCACAATGGGCGGAAGCCTGATGCAGCAACGCCGCGTGAGGGATGACGG  
CCTTCGGGTTGTAAACCTCTTTTAGCAGGGAAGAAGCGAGAGTGACGGTACCTGCAGAAA  
AAGCGCCGGCTAACTACGTG

>1494 len=141 tot-seq=12

GTTATGAAAGAGCTGGTTCTTGTCTCAGCCTGATGGGTCCCTCAGGGGCGGCGCATGT  
GTAGCAGCTTTTCAGGAGTATGGGGGGTGACGGGAGCCAGGGGCCACGTGGTGCAGATGG  
GAGAGAGGCCAGCAGATGGGT

>1495 len=143 tot-seq=12

TGAGGAATATTGGTCAATGGACGAGAGTCTGAACCAGCCAAGTAGCGTGCGGGATGAAGG  
CCTTCGGGTTGTAAACCGCTTTTGATTGGGAGCAAGCCTTCGGGTGAGTGTACCTTTCGA  
ATAAGCGCCGGCTAACTACGTGG

>1496 len=143 tot-seq=12

TAGGGAATCTCCACAATGGGCGCAAGCCTGATGGAGCAACACCPCGCGTGCGGGATGAAGG

CCTTCGGGTTGTAAACCGCTTTTGATTGGGAGCAAGCCTTTTGGGTGAGTGTACCTTTTCG  
AATAAGCGCCGGCTAACTACGTG

>1497 len=145 tot-seq=12

TTAAATACATGGAGCAGGAACCAGCCTGCGGTGTCACAGCAGCCGCCTCAGCACCGGCCA  
ACGAGCTCAACCAGGTGCACGTGGAACCAAAGACAAGCCCCTGACCACCAGAGCATGCC  
GGCCAGGACAAGGGAAGTGGTGTGA

>1498 len=148 tot-seq=12

GAAAGTTGGCCTATTGTGATTGTCACCATGCCCTCAGGGCCCAAACAGCTGGGAAAAAGG  
AGGCAGCAGGCAAGAGACCTGGAGGAGGCCCGCCAGGTGTCAGCCAGCAAACCTCAAACA  
GAGCAGCAGCCTAAGCACTCAGAAGCAG

>1499 len=151 tot-seq=12

CCAGCACAGGGTAGAAGGGCAGTGGCAGTCCAGCTCCCTGTCAGGTGTGTCTGCCGTGTA  
AAATAATAATATGCCCCACCCATGGCTGTGTGGCCTGCACACTCCCACATGCATGCCCA  
CACACAGACTGAAGGAATTGTACCCCTTCC

>1500 len=153 tot-seq=12

AAGCTGGGAGAGGCCACAGAGCAGACTCATCGTCGTCTTCAGCGGCCACAGGAGGGGCC  
ACACAGCTCATACTTGACCCTGGATTTCCAGCCTCCCTGGTGTACAGACTACTCTCT  
GGTGCTCACACTATTCAGTCTATGCTACCTGTT

>1501 len=154 tot-seq=12

TGAGGAATATTGGTCAATGGACGAGAGTCTGAACCAGCCAAGTCGCGTGAAGGAAGACGG  
ATCTATGGTTTGTAACTTCTTTAGTGCGGGAACAAAGCGGCGTCGTGACGCCTGATGAG  
TGTACCGCAAGAATAAGCATCGGCTAACTCCGTG

>1502 len=155 tot-seq=12

TGAGGAATATTGGTCAATGGTCGCAAGACTGAACCAGCCATGCCGCGTGCAGGAAGACGG  
TCCTATGGATTGTAACTGCTTTTATACAGGAAGAAACCCCTCCACGTGTGGGAGCTTGA  
CGGTACTIONTAGGAATAAGGATCGGCTAACTCCGTG

>1503 len=155 tot-seq=12

TGGGGAATCTTGACAATGGGCGAAAGCCTGATGCAGCGACGCCGCGTGCGGGATGACGG  
CCCTATGGGTTGTAACTGCTTTTATATGGGAATAAAGTGAGGGACGTGTCCCTTATTGC

ATGTACCATACGAATAAGGACCGGCTAATTCCGTG

>1504 len=155 tot-seq=12

TAAGGAATATTGGTCAATGGACGCAAGTCTGAACCAGCCATGCCGCGTGAAGGATTAAGG  
TCCTCTGGATTGTAACTTCTTTATTTGGGACGAAAAGGGACTTTTTAGTTCAACTGA  
CGGTACCAGATGAATAAGCACCGGCTAACTCCGTG

>1505 len=155 tot-seq=12

TGAGGAATATTGGTCAATGGGCGGGAGCCTGAACCAGCCAAGTAGCGTGAAGGATGACTG  
CCCTACGGGTTGTAACTTCTTTGTTTGGGAATAAAAGACGCTACGTGTAGCGTTCTGC  
ATGTACCTTACGAATAAGCATCGGCTAATTCCGTG

>1506 len=155 tot-seq=12

TAAGGAATATTGGTCAATGGGCGGAAGCCTGAACCAGCCATGCCGCGTGCAGGATGACTG  
CCCTATGGGTTGTAACTGCTTTTGTCCAGGAATAAACCTAGATACGTGTATCTAGCTGA  
ATGTACTGGAAGAATAAGGATCGGCTAACTCCGTG

>1507 len=159 tot-seq=12

TAGGGAATCTTCCGCAATGGACGCAAGTCTGACGGAGCAACGCCGCGTGTGTGAAGAAGG  
TTTTCGGACCGTAAAGCACTGTTGTTAGAGAAGAACACCCTGTAAGTAACTACTACAGGA  
TTGACGGTATCTAACCAGAAAGCCACGGCTAACTACGTG

>1508 len=160 tot-seq=12

TGGGGAATATTGCGCAATGGGGGCAACCCTGACGCAGCCATGCCGCGTGAATGAAGAAGG  
CCTTCGGGTTGTAAAGTTCTTTCGGTATTGAGGAAGGTTGATGTGTTAATAGTACATCAA  
ATTGACGTAAATACAGAAGAAGCACCGGCTAACTCCGTG

>1509 len=160 tot-seq=12

TGGGGAATATTGCGCAATGGGGGAAACCCTGACGCAGCGACGCCGCGTGCGGGATGAAGG  
CCTTCGGATCGTAAACTCTGTTGTTAGAGAAGAACACGAGTGAGAGTAACTGTTTCATTC  
GATGACGGTATCTAACCAGCAAGTCACGGCTAACTACGTG

>1510 len=160 tot-seq=12

TAGGGAATCTTCCACAATGGGCGCAAGCCTGATGGAGCAACACCPCGCGTGAGTGAAGAAGG  
GTTTCGGCTCGTAAAGCTCTGTTGTTGGAGAAGAACGTGCGTGAGAGTAACTGGCCTTTA  
TTTGACGGTAATCAACCAGAAAGTCACGGCTAACTACGTG

>1511 len=160 tot-seq=12

TGGGGAATTTTGGACAATGGGGGCAACCCTGATCCAGCCATGCCGCGTGAGTGAAGAAGG  
CCTTCGGGTTGTAAAGCTCTTTCGGACGGAACGAAATGGGCGGGACTAATACTCCTGTCC  
GATGACGGTACCGTAAGAAGAAGCACCGGCTAACTACGTG

>1512 len=160 tot-seq=12

TGGGGAATATTGCACAATGGGCGAAAGTCTGACGGAGCAACGCCGCGTGAGTGAAGAAGG  
ATTCGGTTCGTAAACTCTGTTGTTAGGGAAGAAAAATGTATAGTAACTATATACAAA  
AGAGACGGTACCTAACAGAAAGCCACGGCTAACTACGTG

>1513 len=160 tot-seq=12

TGGGGAATATTGGACAATGGGCGAAAGCCTGATCCAGCCATGCCGCGTGGGTGAAGAAGG  
CCTTCGGGTTGTAAAGCCCTTTTGTGGGAAAGAAAACCTTCCGGCTAATACCCGGAGAG  
AATGACGGTACCCAAAGAATAAGCACCGGCTAACTTCGTG

>1514 len=160 tot-seq=12

TAGGGAATTTTCGGCAATGGGCGAAAGCCTGACCGAGCAACGCCGCGTGAGTGAAGAAGG  
CCTTCGGGTTGTAAAGCTCTGTTGTGAAGGAAGAACGGCTCATAACAGGGAATGGTATGGG  
AGTGACGGTACTTTACCAGAAAGCCACGGCTAACTACGTG

>1515 len=161 tot-seq=12

TGGGGAATATTGGACAATGGAGGAAACTCTGATCCAGCAATTCTGTGTGTGTGAAGAAGG  
TTTTCGGATCGTAAAGCTCTGTTGTAAGAGAAGAACGAGTGTGAGAGTGGAAAGTTCACA  
CTGTGACGGTATCTTACCAGAAAGGGACGGCTAACTACGTG

>1516 len=161 tot-seq=12

TGGGGAATCTCCGCAATGGGCGAAAGCCTGACGGAGCAACGCCGCGTGAACGATGAAGG  
TCTTAGGATCGTAAAGTTCTGTTGTTAGGGACGAAGGGTAAGAATCATAATAAGGTTTTT  
ATTTGACGGTACCTAACGAGGAAGCCACGGCTAACTACGTG

>1517 len=175 tot-seq=12

TGGGGAATATTGCGCAATGGGGGGAACCCTGACGCAGCGACGCCGTGTAAAGGAAGAAGG  
TCTTCGGATCGTAAACTTATATCGATTGTGAAAAGTAAGGATGGTAGCAAAGTAAGAAGC  
CCCGGCTAACTACGTGCCAGCAGCCGCGTAATCAGGAGATCGGAAGAGCGTCGTG

>1518 len=178 tot-seq=12

TGAGGAATATTGGTCAATGGACGCAAGTCTGAACCAGCCATGCCGCGTGCAGGAAGACGG  
CTCTACGAGTTGTAAACTGCTTTTGTACTAGGGTAAACCTATCTACGTGTAGATAGCTGA  
AAGTATAGTACGAATAAGGATCGGCTAACTCCGTGAATAAGGATCGGCTAACTCCGTG  
>1519 len=179 tot-seq=12

TGTCTACCTGGAGGGGGCTGTGCGTATGATCGATGAGAACCAGGCCTCCTACACGACTGT  
GATCCCCGAATCCCTGATCTCTGAATACGGGTGCGCGGACTTTACCGGCAGTGAGGACCG  
GGCCGTGCTGATTCGGGATCTGGAGATGGTGAATCATGACGTCTATTATACGGTCGAAA  
>1520 len=203 tot-seq=12

TGGGGAATATTGGACAATGGGCGCAAGCCTGATCCAGCCATGCCGCGTGTGTGAAGAAGG  
CCTTCGGGTTGTAAAGCACTTTCAGCGAGGAGGAAGGGAGTAGTGTTAATAGTACTATTT  
CTTGACGTTACTCGCAGAAGAAGCACCGGCTAACTCCGTGCCAGCAGCGCGGTAATGTTT  
AGATCGGAAGAGCGTCGTGTTGG  
>1521 len=203 tot-seq=12

TGAGGAATATTGGTCAATGGACGCAAGTCTGACGGAGCAACGCCGCGTGAGTGAAGAAGG  
TTTTCGGATCGTAAACTCTGTTGTAAGAGAAGAACAATTGTAGAGTAACTGCTACAGT  
CTTGACGGTATCTTACCAGAAAGCCACGGCTAACTACGTGCCAGCAGCCGCGGTATCCGA  
AGATCGGAAGAGCGTCGTGTATG  
>1522 len=204 tot-seq=12

TGGGGAATATTGGACAATGGGGGGAACCCTGATCCAGCCATGCCGCGTGTGTGAAGAAGG  
CCTTTTGGTTGTAAAGCACTTTAAGCAGTGAAGAAGACCATATGGTTAATACCCATATGC  
GATGACATTAGCTGCAGAATAAGCACCGGCTAACTCTGTGCCAGCAGCGCGGTAATGCTC  
AGATCGGAAGAGCGTCGTGTATGG  
>1523 len=208 tot-seq=12

AGGTTTTGCTCTCACTGCCAAGATGATCGTCTATACAGGAGCAACGTTTGCCTCTCAG  
ATGGGGCCTGAGGAAGAGCTGACTCTGGACTTAAGGGCAAGGGTTAAATTTAAGGCAGGG  
AGATTCTGTACCCGGGCAGCATCTCCACCTGCTAATGCCTTTCTCTGGGCATGGAGAAT  
GTAGCATTCAAAAAGTTAGCCAATCCAA  
>1524 len=208 tot-seq=12

ACGATTGCCCCATCGAATCGGCCTAGGACCTTGAGTGTGTTGCCAGGTTCCCACTAGCC



TTGGCCTCCCCATGCGGTCACCAATGGTCCTGGAGGGCAGGAAGGAGTGAGGAGTCAGT  
TGGGTCTAGTTGGGCCCTGAGATGAGCAAGAAGCCTCAGAGGGGAAAGACAGACAGTGAA  
AAGTTAGCTCTACACATGCATTGGTGAT

>1525 len=210 tot-seq=12

CCTGTCAGGAGTGGAGGGTGAGTCGGCTCAGCCAATGCGCATGCGCGAGGCCCCAGCGGT  
TTCTCGGGTCACAGTGGTCCCACGGTTGTCTTAGAAACCAGTCCCCGAGGCTTTGCAGA  
GCAGGAGCCCTCCGTGGCAGTGCTTGGGTATCGAGGCTCTGAGGCTCCGGTCTCACCTCT  
CCACGGGCTCGAAGGGAAACTCTCCTGATG

>1526 len=212 tot-seq=12

ATGACCATTTACTGCCAGGGTGTGTGAACCAGGGAACATCCCCACATTACTACTAA  
GTAATGAGGAGGGGACTTAGATATGTTCCACAATTCAGATGGGCCTGCCAGTTGGCCCCCT  
GAGCTTCATTCTGTGTGATCCATACACAGCAGAGACTCAGGAGGCAATGCAAATGAAT  
CAACAGACAGCACTGAGGTCAGCACTGAGGTC

>1527 len=215 tot-seq=12

TAGTCCGGAAGGTAGAGGATGTTAATGGACCCATTGCGAGGACAGTGTTTTAGTAACAGA  
AGAGGAGTATTTTGTGTTCTTTAAATGACAAATCGTCTGCAATTTCTTTCTCCTTTAG  
TAGGTCAATGACGGGAAAAGATAGCATACATGTTCCATGATGAATTTTTTTGAACTTGG  
GCTCCTGCCTTTGTTTTTTGTGCAGGAAGCCACCT

>1528 len=216 tot-seq=12

TCTTGATAGAAAAGTTCTCTTCTTCTTGACAAGTCCTGTCTCCAGCTCCTTGGGTCTCA  
GGCATGGCTTTTCTTGCAGGATAACCATCCTTAATCTCAGCTGCTCCTGATTGGCCAAG  
GAATCCTGGGCTGATAGTGTACCCAGCAGCCCCATCCAGCTGCTCCTGATTGGCCAAG  
GAATCCTGAGCTGATAGTGTACCCCCAGCCCCCA

>1529 len=223 tot-seq=12

TAGGGAATCTTCGGCAATGGACGAAAGTCTGACCGAGCAACGCCGCGTGAGTGAAGAAGG  
TTTTCGGATCGTAAAACCTCTGTTGTTAGAGAAGAATAAGTAGGAGAGTAACTGCTCTTAC  
CTTGACGGTATCTAACCAGAAAGCCACGGCTAACTACGTGAGTAGGAGAGTAACTGCTCT  
TACCTTGACGGTATCTAACCAGAAAGCCACGGCTAACTACGTG

>1530 len=230 tot-seq=12

CAATGACCCTCTTCACCCTCCAGCCCCGGAGCATGATGATGAGGCTGATGGCGTCCCAGG  
GGCTCCTGGGTCCATTGGCCACAGTGGATGCCACCATCGGAGCCAAAGATAGGATGATCA  
CAGCCCCGTCAAACACCTGTGAGAGGAGGCCCATTTTCAGTGCCCTGGGCCCTGCCGTGTG  
TCCGGGACCAGGGGTCAAGTCAGGCAAAGCAGCTGGTGCTGCCCAACTTTT

>1531 len=138 tot-seq=12

TGGGGAATTTTGGACAATGGGCGCAAGCCTGATCCAGCAACGATGCGTGGAGGATGAAGG  
TTTTCGGATTGTAAACTCCTTTAAGGGGGACGAAACAAATGACGGTACCCCTTGAATAA  
GCCACGGCTAACTACGTG

>1532 len=157 tot-seq=12

TAGGGAATCTTCCACAATGGACGAAAGTCTGATGGAGCAACGCCGCGTGAGTGAAGAAGG  
TTTTCGGATCGTAAAGCTCTGTTGGTGAAGAAGGATAGAGGTAGTAACTGGCCTTTATTT  
GACGGTAATCAACCAGAAAGTCACGGCTAACTACGTG

>1533 len=138 tot-seq=12

TAGGGAATCTTGCACAATGGGCGAAAGCCTGATGCAGCAACGCCGCGTGAAGGAAGAAGG  
CCTTCGGGCTGTAAACTTCTGTTCTTGGGGAAGAAGTAAGTGACGGTACCCAAGGAGGAA  
GCCCCGGCTAACTACGTG

>1534 len=137 tot-seq=12

TGGGGAATATTGCACAATGGGCGGAAGCCTGATGCAGCGACGCCGCGTGGGGGATGACGG  
CCTTCGGGTTGTAAACTCCTTCGCCAAAGACGAATTTTTGACGGTATTTGGAGAAGAAG  
CACCGGCTAACTACGTG

>1535 len=161 tot-seq=12

TGGGGAATCTCCGCAATGGACGAAAGTCTGACGGAGCAACGCCGCGTGAGTGAAGAAGG  
TCTTCGGATTGTAAAGCTCTGTTGTAAGAGAAGAACGAGTGTGAGAGTGGAAGTTCACA  
CTGTGACGGTATCTTACCAGAAAGGGACGGCTAACTACGTG

>1536 len=161 tot-seq=12

TGGGGAATTGTTGCAATGGGCGCAAGCCTGACGACGCAACGCCGCGTGGAGGACGAAGA  
TCTTCGGGTCGTAAACTCCTTCGATCGAGAAGAATGCCTATAGGGTGAATAGCCCTGTA  
GGGTGACGGTATCGAGAGAAGAAGCCCCGGCTAACTCTGTG

>1537 len=160 tot-seq=12

TAGGGAATCTTCGGCAATGGGGGAAACCCTGACCGAGCAACGCCGCGTGAGTGAAGAAGG  
TCTTCGGATTGTAAAGCACTTTAAGTTGGGAGGAAGGGCAGTTACCTAATACGTGATTGT  
TTTGACGTTACCGACAGAATAAGCACCGGCTAACTCTGTG

>1538 len=135 tot-seq=12

TCGAGAATCATTACAATGGGGGAAACCCTGATGCAGCGACGCCGCGTGAGTGAAGAAGT  
ATTTCCGGTATGTAAAGCTCTATCAGCAGGGAAGAAAATGACGGTACCTGACTAAGAAGCC  
CCGGCTAACTACGTG

>1539 len=138 tot-seq=12

TGGGGAATCTTCGGCAATGGACGAAAGTCTGACGGAGCAACGCCGCGTGAGTGAAGAAGG  
TTTTAGGACTGTAAAACACTTTTAGTAGGGAAGAAAAAATGACGGTACCTACAGAAGAA  
GCAACGGCTAAATACGTG

>1540 len=155 tot-seq=12

TGGGGAATATTGCGCAATGGGGGAAACCCTGAACCAGCCAAGTAGCGTGCAGGATGACGG  
CCCTATGGGTTGTAAACTGCTTTTATATGGGGATAAAGTGGGGAACGTGTTCCCTTTTGC  
AGGTACCATATGAATAAGGACCGGCTAATTCCGTG

>1541 len=161 tot-seq=12

TGGGGAATATTGCGCAATGGGGGAAACCCTGACGGAGCAACGCCGCGTGAGTGAAGACGG  
TCTTCGGATTGTAAAGCTCTGTTATACGGGACGAACGGCAAGGTGGTAAATAGCCATCAT  
GAGTGACGGTACCGTAAGAGAAAGCCACGGCTAACTACGTG

>1542 len=192 tot-seq=12

GGGGCGGGAGAGATGGCTCGGTGGCTGAGAGCACTGACTGCTCTTCTGAAGGTTCTGAGT  
TCAATTTCCGGGGCCACATGGTGGCTCACAAACATCCGTAACAGGATCTGGCACCCCTCTT  
CTGGAGTGTCTGGGGACAGCTGCAGTGTACTTACGTATAGTAAATAAATAAATCTTTAAA  
AAAAGAGTGGAG

>1543 len=102 tot-seq=11

AGACAGAAGGGGCCCTTCAAGAGCAGCGTGGGGGACAGAGTACCAGGGCAGTGAAGGA  
GAGCGACACCCAGTGACACCCAGAGGCCTGCACGCTTGTCAT

>1544 len=105 tot-seq=11

GACCCAGCACTGACCTTAGAGAACTCACAGCCCACAGGGGACAGACCACCCCACTGAAGG

ATAAAACCTCAGTGGAGATGAGGCTGTGGATCTGCAGTCGGGGGG

>1545 len=123 tot-seq=11

AAACTCAGCCAGGTCCATGGTGAAGGTAAGGAGAAGTTAGGCTTGGCTGAAGCATAGG  
CATCAAGCAACCAGCCTGGATGAAGCTGAGACAGCAGTGGGTCAGTTCCTAGAGCTGTGA  
TGG

>1546 len=129 tot-seq=11

GCCCAGTGGTTCACCCAGGCAGCTCACACTAGGAATGGGCAAGATGGGCAGGGCTTGGG  
AGGAGCCATAAGGTGAGGGGAGCGTGGCACCTCACGGAGACAAGAGCAAGACCAGCAGAC  
ACAGGCATG

>1547 len=135 tot-seq=11

TGGGGAATCTTAGACAATGGGCGCAAGCCTGATCTAGCCATGCCGCGTGAGTGATGAAGG  
CCTTAGGGTCGTAAAGCTCTTCGCTGGGGAAGATAATGACGGTACCCAGTAAAGAAACC  
CCGGCTAACTCCGTG

>1548 len=135 tot-seq=11

TAGGGAATCTTCCACAATGGACGCAAGTCTGATGGAGCAACGCCGCGTGAACGAAGAAGG  
TATTCGTATCGTAAAGTTCTGTCCTATGGGAAGATAATGACAGTACCATAGAAGAAAGCT  
CCGGCTAAATACGTG

>1549 len=135 tot-seq=11

AGGGAATCTTCCACAATGGACGCAAGTCTGATGGAGCGACGCCGCGTGAGTGAAGAAGTA  
TCTCGGTATGTAAAGCTCTATCAGCAGGGAAGAAAATGACGGTACCTGACTAAGAAGCCC  
CGGCTAACTACGTGG

>1550 len=136 tot-seq=11

TGGGGAATATTGGGCAATGGAGGAACTCTGACCCAGCAACGCCGCGTGAAGGATGAAGG  
TTTTCGGATTGTAAACTTCTGTCGCGAGGGACGAAGAATGACGGTACCTCGTAAGAAAGC  
CCCGCAAACACTACGTG

>1551 len=138 tot-seq=11

TGGGGAATATTGCACAATGGAGGAACTCTGATGCAGCAACGCCGCGTGAAGGAAGAAGG  
TTTTCGGATCGTAAACTTCTATCAATAGGGACGAAACAAATGACGGTACCTAAATAAGAA  
GCCCCGGCTAACTACGTG

>1552 len=138 tot-seq=11

TGGGGAATATTGCACAATGGGCGAAAGCCTGATGCAGCGACGCCGCGTGAAGTATGAAGG  
CCTTCGGGTTGTAACTTCTTTGATCAGGGAAGAAACAAATGACGGTACCTGAAAAACAA  
GCCACGGCTAACTACGTG

>1553 len=138 tot-seq=11

TGGGGAATATTGCGCAATGGGGGCAACCCTGACGCAGCAACGCCGCGTGAAGGATGAAGG  
TTTTCGGATTGTAACTTCTTTTGTGCGAGGACGAAGCAAGTACGGTACTCGACGAATAA  
GCCACGGCTAACTACGTG

>1554 len=140 tot-seq=11

TGGAGAATCTTGCGCAATGGGCGAAAGCCTGACGCAGCCACGCCGCGTGCGGGAAGAAGG  
CCTTCGGGTCGTAAACCGCTTTCAGGAGGGAAGAAGCGAAAGTACGGTACCTCCAGAAG  
AAGCCCCGGCCAACTATGTG

>1555 len=141 tot-seq=11

TGAAGATGATCAGCATATCCCAACTCCCAAGAACAACCATAACAACAACCATACATTTT  
CTTAAGTCTGCACCTTATTGAAAGTAATTATTCCTTCTGCTTACCTTTACCATTGACTTC  
TTGAAAGAGAAATCCATGCAC

>1556 len=144 tot-seq=11

TGGGGAATTTCCACAATGGGTGAAAGCCTGACGGAGCAATGCCGCGTGGAGGTGGAAGG  
CCTACGGGTCGTCAACTTCTTTTCTCGAAGAAGAAACAATGACGGTATCTGAGGAATAAG  
CATCGGCTAACTCTGTGCCAGCAG

>1557 len=145 tot-seq=11

AATGGAACAAGAAAATAAAACCCATTCTTGCAGAAAACACCCAAGCATATTCAGACTG  
ACTGGAGTAGAGAAGTTTGCCAAGAATGAGGGTCATTCCGGGCATCCATCAGCAACAGCC  
CTGGCTTTCTAGGCTAGCATCAGAG

>1558 len=150 tot-seq=11

CAAGGCAAGGTGAGGGGGATCTGTTTAGCAAATCTCGTGGCAGTGTCTGGGCATTGGGAA  
TGAACATCTGGCAGATCTGAGAATTGGGGCTACAAAAGATTGAGCCACTCCCTGAAACAG  
TCATACAAGGGTTCCCTGAAGGCAGCCCCC

>1559 len=154 tot-seq=11

TAGGGAATATTGGACAATGGGCGGGAGCCTGATCCAGCCATGCCGCGTGCAGGAAGAAGG  
CCTTCTGGGTTGTAACTGCTTTTGCCGGGGGATAAAATGCCCTGCGGGGAAATTGAA  
GGTACCCGGTGAATAAGCCACGGCTAACTACGTG

>1560 len=154 tot-seq=11

TAGGGAATATTGGGCAATGGACGGAAGTCTGACCCAGCCATGCCGCGTGCAGGAAGAAGG  
CCTTCTGGGTTGTAACTGCTTTTATATAGGAAGAAAACACCCATGCGTGGGAACCTGAC  
GGTACTATATGAATAAGCACCGGCTAACTCCGTG

>1561 len=155 tot-seq=11

TGAGGAATATTGGTCAATGGACGCAAGTCTGAACCAGCCATGCCGCGTGCAGGATGACGG  
TCCTATGGATTGTAACTGCTTTTGTACGAGAAGAAACACTAGTTCGTGAACTAGCTTGA  
CGGTATCGTAAGAATAAGGATCGGCTAACTCCGTG

>1562 len=155 tot-seq=11

TGAGGAATATTGGTCAATGGACGCAAGTCTGAACCAGCCAAGTAGCGTGCAGGAAGACGG  
CCCTCTGGGTTGTAACTGCTTTTAGTTGGGAATAAAGTGCACCACGAGTGGTGTTTTGT  
ATGTACCATCAGAAAAGGACCGGCTAATTCCGTG

>1563 len=155 tot-seq=11

TGAGGAATATTGGTCAATGGGCGGGAGCCTGAACCAGCCAAGTCGCGTGAAGGAAGAAGG  
ATCTATGGTTCGTAACTTCTTTTGCAGGGGAATAAAGTGCAGGACGTGTCCTGTTTTGT  
ATGTACCCTGAGAATAAGGATCGGCTAACTCCGTG

>1564 len=155 tot-seq=11

TGAGGAATATTGGTCAATGGACGGAAGTCTGAACCAGCCAAGTAGCGTGCAGGATGACGG  
CCTTATGGGTTGTAACTGCTTTTGTATGGGGATAAAGTCAATCACGTGTGATTGTTTGC  
AGGTACCATACGAATAAGGACCGGCTAATTCCGTG

>1565 len=155 tot-seq=11

TAAGGAATATTGGTCAATGGAGGGAAGTCTGAACCAGCCATGCCGCGTGCAGGATGACTG  
CCCTATGGGTTGTAACTGCTTTTGTACAGGGAATAAACCTTCCACGTGTGGGAAGCTGA  
ATGTACCTGAAGAATAAGGATCGGCTAACTCCGTG

>1566 len=155 tot-seq=11

AGGGCTAGTTGAGACACTGTGTAACATGAAGACACAGGATGACAACATAGACAATGGAGA

GAGGCACCCTGAAGATGCCACCCGATCTCCCTAGTCAAGATCAGCTTAGAACCTGAAGGG  
ACCTTCCTGTGCAAGGAGAAAGTAGCAGGAGGCC

>1567 len=155 tot-seq=11

TAAGGAATATTGGTCAATGGACGCAAGTCTGAACCAGCCATGCCGCGTGGAGGATGACGG  
CCCTCTGGGTTGTAAACTCCTTTTATCTGGGAAGAAATGCACTTTTTCTAAAGTGTTTGA  
CGGTACCAGAGGAATAAGCACCGGCTAACTCCGTG

>1568 len=155 tot-seq=11

TGAGGAATATTGGTCAATGGACGTAAGTCTGAACCAGCCAAGTCGCGTGAGGGAAGACTG  
CCCTATGGGTTGTAAACCTCCTTTTATAAGGGAAGAATAAGTTCTACGTGTAGAATGATGC  
CTGTACCTTATGAATAAGCATCGGCTAACTCCGTG

>1569 len=155 tot-seq=11

TGAGGAATATTGGTCAATGGCCGAAGGGCTGAACCAGCCAAGCCGCGTGAAGGAATAAGG  
CCCTACGGGTCGTAAACTTCTTTAGTCAGGGAACAAAGGGTGCCACGTGTGGCGCTGTGA  
GTGTACCTGAAGAATAAGCATCGGCTAACTCCGTG

>1570 len=157 tot-seq=11

CTCAAGGGACATGGGGTCTCAGCCCGCAAGAACTTCAAACATCCTCGGAGGGCCTCC  
CTGGTGGCGCAGTGGATCAGAGTCCACCTGTCAACGCAGGGGACACAGTTCAATTCCCG  
GTCTGGAAGAGCCCACATGCTGCGGAACCACTAAGC

>1571 len=159 tot-seq=11

AACATCCTTTGAGAAACCAGCAGAAAGAGCCAGGAAAGTAGACAGCTACTTGGCATCTGA  
GGAGGCATCGATGAGTGAACGAAGGGCAAGCAACAAATGTAGCCAAGAGGCTAGCTGTG  
TAGGTTGCTGCAATACAAGTGACACAGCAAGACCAGTGG

>1572 len=160 tot-seq=11

TAGGGAATCTCCACAATGGGCGAAAGCCTGATGGAGCAACGCCGCGTGGGTGAAGAAGG  
TCTTCGGATCGTAAACCCTGTTGTTAGAGAAGAACGTATCTGAGAGTAACTGTTTCAGGT  
AGTGACGGTATCCAACCAGAAAGTCACGGCTAACTACGTG

>1573 len=160 tot-seq=11

TGGGAATATTGGACAATGGGCGAAAGCCTGATCCAGCCATGCCGCGTGTGTGAAGAAGG  
TCTTCGGATTGTAAAGCACTTTAAGTTGGGAGGAAGGGTAGTAACTTAATACGTTGCTAC

TTTGACGTTACCGACAGAATAAGCACCGGCTAACTTCGTG

>1574 len=160 tot-seq=11

TCGAGGATCTTTTCGCAATGGGCGAAAGCCTGACGGAGCGACGCTGTGTGAGTGATGAAGG

CCTTCGGGTTGTAAACTCTTTTGCCTGTGAACAAGAACGATTCGTGAATAACGAGTCAA

TTTGAGGGTAGCAGGAGAAAAAGCACCGGCTAACTACGTG

>1575 len=160 tot-seq=11

TGGGGAATTTTGGACAATGGGCGCAAGTCTGATCCAGCAATGCCGCGTGAGTGAAGAAGG

CCTTTGGGTTGTAAAGCTCTTTTGTGAGGGAAGAAACGGTTGGGGCTAATATCCCCGGCT

AATGACGGTACTTGAAGAATAAGCACCGGCTAACTACGTG

>1576 len=160 tot-seq=11

TAGGGAATCTTCCGCAATGGACGCAAGTCTGACGGAGCAACGCCGCGTGAGTGAAGAAGG

ATTTTCGGTTCGTAAAGCACTGTTGTTAAGGAAGAATAGTAGTAAGAGTAACTGTTTACTA

ATTGACGGTACTTAACCAGAAAGCCACGGCTAACTACGTG

>1577 len=160 tot-seq=11

TAGGGAATTTTTCGGCAATGGGGGAAACCCTGACCGAGCAACGCCGCGTGAAGGAAGAAGT

AATTCGTTATGTAAACTTCTGTCATAGAGGAAGAACGGTGCGTGTAGGGAATGACATGCA

AGTGACGGCACTCTATAAGAAAGCCACGGCTAACTACGTG

>1578 len=160 tot-seq=11

TGGGGAATTTTGGACAATGGGCGCAAGCCTGATCCAGCCATGCCGCGTGAGTGAAGAAGG

CCTTCGGGTTGTAAAGCTCTTTCAGTCGGGAAGAAACGGGGCTCTCTAACATAGGGTCTT

AATGACGGTACCGACAGAAGAAGCACCGGCTAACTACGTG

>1579 len=160 tot-seq=11

TGGGGAATATTGGACAATGGGGGCAACCCTGATCCAGCCATGCCGCGTGAGTGAAGAAGG

CCTTTTGGTTGTAAAGCACTTTAAGCAGTGAAGAAGACTCCATGGTTAATACCCATGGAC

GATGACATTAGCTGCAGAATAAGCACCGGCTAACTCTGTG

>1580 len=160 tot-seq=11

TGGGGAATTTTGGACAATGGGCGCAAGCCTGATCCAGCCATGCCGCGTGAGGGAAGAAGG

CCTTCGGGTTGTAAACCACTTTTGTGAGGGAAGAAACGGCCTTTTCTAATACAGGGGGCT

AATGACGGTACCTGAAGAATAAGCACCGGCTAACTACGTG



>1581 len=161 tot-seq=11

TTAGGAATATTCGTCAATGGGGGCAACCCTGAACGAGCAATGCCGCGTGAACGATGACGG  
TCCTCTGGATTGTAAAGTTCTGTTGTTTGGAAAGAATTGACTGATAGGAAATGATCAGT  
GCTTGACGGTACCATTCAAGAAAGCCACGGCTAACTACGTG

>1582 len=161 tot-seq=11

TTAGGAATATTCGTCAATGGGGGAAACCCTGAACGAGCAATGCCGCGTGAACGATGACGG  
TCCTCTGGATTGTAAAGTTCTGTTGTTTGGGAAGAACGGCTCTAATAGGAAATGATTAGA  
GATTGACTGTACCATTCAAGAAAGCCACGGCTAACTACGTG

>1583 len=161 tot-seq=11

TGGGGAATATTGCACAATGGGCGAAAGCCTGATGCAGCGACGCCGCGTGAGCGAAGAAGT  
ATTCGGTATGTAAAGCTCTGTTATACGGGACGAAAAGACGGATGCCAACAGTATCCGT  
CCGTGACGGTACCGTAAGAGAAAGCCACGGCTAACTACGTG

>1584 len=161 tot-seq=11

TTAGGGATATTCGTCAATGGGGGGAACCCTGAACGAGCAATGCCGCGTGAGTGAAGACGA  
TTCTATGGATTGTAAACTCTGTTGACAGGGACGAACGACCATTATAGGAAATGATAGTG  
GAGTGACGGTACCTGTGAGGAAGCTCCGGCTAACTACGTG

>1585 len=161 tot-seq=11

TGGGGAATATTGCGCAATGGGCGAAAGCCTGACGCAGCGACGCCGCGTGAGGGATGAAGG  
TCTTCGGATCGTAAACCTCTGTCAGGAGGGAAGAAGTGGTTATATGCGAATAGTGTATGA  
CTTTGACGGTACCTCAAAGGAAGCACCGGCTAACTCCGTG

>1586 len=174 tot-seq=11

GGACTGTGGGCAAGGGAGTCCCCCTTGAAGCAAAGGTATGCTTGCACTCACCATCTCAA  
GTACACCTGTACAGGGAATAGAATTAAGTTACATTTAAGCCAATTGACCAAGAAATTTGA  
GTTGTATTCAGTAGGCACATTCCTTCATGACCTCAGATTCTACCAGGCCACTGG

>1587 len=178 tot-seq=11

AAGTTACAAAACCAGCAAAGTGATTTTTTAAAAATGAAATCCTTATTTTCCTTCAAAAAG  
TGCTATCATTTCTGAAAATTTTTAAATTTCTTATTTTTTACAGTAGCTGTATTCTATGCT  
TTTGTTGTGAAGGCTTCACTCCAGCTCGCTATGCGTCTATGCTGAGTGTGAATATAA

>1588 len=184 tot-seq=11

TGATAGTGTCAAGTGTTTTAACTCATTTGATCCCATAGTAACCTATAGGGAAGGTGACAT  
TTCATCCCCATTTTACAGATGAGGAAACAGAGACCCAGATAGTTTAAGTACCTTGCCCA  
AAGTCCCAGAGCGAGGAAGAAGTGGACTGTTTCAGCACAGAGACTCACACATAGTGAGCAC  
TTCA

>1589 len=200 tot-seq=11

GGCGGGGGGGTGTCTCTGGATCGAGCCTTGAGTGGAGGGGGCTGCTCGGCATCTGTGCT  
GTGTGCCCAGACTCCCCTCAGTGCACCCCTCTGTGCTCCCCATGGGAAGACACACCCCT  
CCCTCCTCCTTTATCAGGCCTCCTGAGGGTCAGGCCCTGCAGGGTATCAGGCCTCCTG  
AGGGTCAGGCCCTGCAGGG

>1590 len=202 tot-seq=11

GCAGAATGTGTGGGCAGTGAGACTTCCCGTGGGGAGATAGAGGCCCTGGTATCCGAGACG  
ATTCTGTCACTGATGTCAACCAGAAAGTGACATCACAGTGGTCACAACCTTCTCTGTGCTC  
TGTGGAAACTTATGAAACCTGGTGGTGTACTCAGGAGCCAGGATGAAAAAAAAAAGCGTG  
GACCCAAGAAGTGTGGCCAGAG

>1591 len=204 tot-seq=11

TAGGGAATCTTCGGCAATGGGGGGAACCCCTGACCGAGCAACGCCGCGTGAGTGAAGAAGG  
TTTTCGGATCGTAAAGCTCTGTTGTTGGTGAAGAAGGATAGAGGTAGTAACTGGCCTTTA  
TTTGACGGTAATCAACCAGAAAGTCACGGCTAACTACGTGCCAGCAGCCGCGTAATCCTC  
AGATCGGAAGAGCGTCGTGTATAG

>1592 len=208 tot-seq=11

TGGGGAATATTGCACAATGGGCGCAAGCCTGATGCAGCAACGCCGCGTGAACGATGAAGG  
TCTTCGGATCGTAAAGCTCTGTTGTTGGTGAAGAAGGACAGGGGTAGTAACTGACCTTTG  
TTTGACGGTAATCAATTAGAAAGTCACGGCTAACTACGTGGACCTTTGTTTGACGGTAAT  
CAATTAGAAAGTCACGGCTAACTACGTG

>1593 len=214 tot-seq=11

GGAGCTGATTGAGCTCATCAGCTGTGCAACAGCGAAGCCCAGAACGGAAGGGCGGGGAAG  
CTTCCGGGGCTGTGCCTGTATTAAGGTCACAGGGTGTGAAGTGATCCCACAGGCTTTCCT  
GCGGGGGTTGTGGATTGGCTGGTTTAAAGAAAACATGCACGAGGAGGAAACTGATTTACA  
TGACTCTGGTGTGAGCATTAGGTCTTATCGTGG

>1594 len=215 tot-seq=11

CCCCATGACCAAGGGAAGGGAAGAGGCATGAGCACCTGGGAAGGCCGGAGGGATGGAGGT  
CCCTGACTGTTGCCCTTGCTCAAATGCCACCTCTTTGTTCTGCCATGGGAGCTGTGAT  
GAGAGGAAGGTGCAGAGAGTGCTGGGCAGAGAGTCAGAGGAAGGCCTGACTTTGGGGTGC  
ACGATACAATCACCCAACCTCTCAGAGGTCGCACA

>1595 len=216 tot-seq=11

TAGGGAATCTTCCACAATGGACGAAAGTCTGATGGAGCAACGCCGCGTGAGTGAAGAAGG  
GTTTCGGCTCGTAAACTCTGTTGTTAAAGAAGAACATATCTGAGAGTAACTGTTCAAGT  
ATTGACGGTATTTAACCAGAAAGCCACGGCTAACTACGTGGAGTAACTGTTCAAGTATTG  
ACGGTATTTAACCAGAAAGCCACGGCTAACTACGTG

>1596 len=217 tot-seq=11

ACTATAAGCCAGTCATAAAGTACTTGTCTGGTATGAAAACGACCCCGAGTTTTATCTCCC  
CTGTGAAAATAAAAAGAAAAACTGCACAAGCTGATTACTTCTGGACAAGGAGCAAAAGAT  
GTCTTTAGGAAAATGTTTTCTCTGCAGGCAAACTGTCAGAGGTGTCTTACCTGGCACAG  
CGTGTAAGCCGGAAGATCGGTCCTCTGCCTCAATAAG

>1597 len=161 tot-seq=11

TGGGGAATTTTTCGCAATGGGGGAAACCCTGACGAAGCAACGCCGCGTGAGGATGAAGG  
CCTTCGGGTCGTAAACTCCTGTGACCGGGACGAATGTGGTCTGGGTCAATACCCCGGGC  
CATTGACTGTACCGGTGGAGGAAGCCACGGCTAACTCTGTG

>1598 len=150 tot-seq=11

TGAGGAATATTGCGCAATGGGCGACAGCCTGACGCAGCGACGCCGCGTGGGGGATGAAGG  
TCTTCGGATTGTAAACCCCTTTCGGGAGGGAAGATGGGACGGGCAACCGTTCGGACGGTA  
CCTCCAGAAGCAGCCACGGCTAACTTCGTG

>1599 len=140 tot-seq=11

TGGGGAATATTGCACAATGGGCGCAAGCCTGATGCAGCGACGCCGCGTGAGGGATGACGG  
CCTTCGGGTTGTAAACCTCTTTCAGCAGGGGAGAAGCGAAAGTGACGGTACCTGCAGAAG  
AAGCGCCGGCTAACTACGTG

>1600 len=143 tot-seq=11

TAGGGAATCTTCCACAATGGACGCAAGTCTGACGCAGCGACGCCGCGTGCGGGATGAAGG

CCTTCGGGTTGTAAACCGCTTTTGATTGGGAGCAAGCCTTTGGGTGAGTGTACCTTTCG  
AATAAGCGCCGGCTAACTACGTG

>1601 len=160 tot-seq=11

TAGGGAATTTTCGTCAATGGGGGGAACCCTGAACGAGCAATGCCGCGTGTGTGAAGACGG  
TCTTCGGATTGTAAAGCACTGTTGTAAGAGAAAAACGGCCATGATAGGAAATGATCATGG  
AGTGATGGTATCTTACCAGAAAGTCACGGCTAACTACGTG

>1602 len=160 tot-seq=11

TAGGGAATCTTCGGCAATGGGGGCAACCCTGACCGAGCAACGCCGCGTGAGTGAAGAAGG  
TTTTCGGATCGTAAAGCTCTGTTGTTAAGAAGAACGTGGGTAAGAGTAACTGTTTACCC  
AGTGACGGTATTTAACAGAAAGCCACGGCTAACTACGTG

>1603 len=135 tot-seq=11

TGGGGAATTTCCGCAATGGGCGAAAGCCTGACGGAGCAATACCGCGTGAGGGACGAAGG  
CTCTGGGTCGTAAACCTCTTTTCTCAAGGAAGATGATGACGGTACTTGAGGAATAAGCA  
TCGGCTAACTCTGTG

>1604 len=160 tot-seq=11

TGGGGAATTTTGGACAATGGGCGAAAGCCTGATCCAGCAATGCCGCGTGTGTGAAGAAGG  
CCTTCGGGTTGTAAAGCACTTTGTCCGAAAGAAATCCTTTGGGTTAATACCTCGGGGG  
GATGACGGTACCGGAAGAATAAGCACCGGCTAACTACGTG

>1605 len=155 tot-seq=11

TGGGGAATATTGCGCAATGGGGGAAACCCTGAAGCAGCCAAGTAGCGTGCAGGATGACGG  
CCCTATGGGTTGTAACTGCTTTTGTGGGAATAATCGACATTACGTGTAATGTTTTGC  
ATGTACCATTGAATAAGGACCGGCTAATTCCGTG

>1606 len=105 tot-seq=10

TGATCTATATTCACACCACTGCACTTCAGCCTGGGTAACAGAATGAGACCTTGTGTCTTA  
AAAAATAAAAAATAAAATTTTAAAAAAGAAAAGATTTCTTACTTCA

>1607 len=119 tot-seq=10

GACACGGAAAAAAACTTAAGAGATTTAATACATTTCTGTAAGTCAACCTTGTGATAA  
CAAGAAGATGGCCTTCAAGAATTGGCCTCAGCCAAAGGAGTATTGGTTGGCAATGACAG

>1608 len=125 tot-seq=10

TTGGAAGTGGAGCTGGGGATTGTGGTGGCCAGCAAATGGTCTGAGGACAGCTCTGAAGG  
GGCACCTGCAGCTGAGATAGGAGGTGGCAGCAGCCATCATCAGGCACTCATGGGGAAGGG  
AGATG

>1609 len=129 tot-seq=10

ACAGCTTACCGAAGCCCAGATCGATATTTTCCAGACCGGCACCTGGGCCAGAGATATCCC  
AGTAGTAGAAGTCAATCATGTGAACATCATGACGCTGATAGAAGCGCTTACCGGCCACA  
TGGTGGAAAC

>1610 len=134 tot-seq=10

GCAGCAGGTCTGAGACCCTGCAGTGTCTGAGTCTGCCCTCAGAAGGTTCTTTCCACAG  
ACTCTGGTCAAGGTCCGTGACACCCAGGTGCTGTAGGGTGGAGCAGAGGTCGAGCTGTTT  
TTCCACGTCCTTCT

>1611 len=135 tot-seq=10

TGGGGAATATTGGACAATGGGGGCAACCCTGATCCAGCCATGCCGCGTGAGTGATGACGG  
CCTTAGGGTTGTAAAGCTCTTTTCTCCGGGACGATAATGACGGTACCGGAGGAATAAGCC  
CCGGCTAACTTCGTG

>1612 len=135 tot-seq=10

CTGGAGCAGAAGTGAGCGGAGAGCAGCCTTGGCTTCTGGGCCCTGGCTGGGAGAGCGGG  
GCTGCCTGGGAAAAGGAGCCCCCTCCTCCAACCTCAGAGGCCCTGGACCCTGACCTTGGC  
CGCCAGCGGCCTGA

>1613 len=135 tot-seq=10

TGAGGAATATTGGTCAATGGGCGAGAGCCTGATGCAGCAACGCCGCGTGAACGATGAAGG  
TCTTCGGATCGTAAAGTTCTGTTGCAGGGGAAGATAATGACGGTACCCTGTGAGGAAGCC  
CCGGCTAACTACGTG

>1614 len=141 tot-seq=10

TGGGGAATATTGCACAATGGGCGCAAGCCTGATGCAGCGACGCCGCGTGTGGGATGACGG  
CCTTCGGGTTGTAAACCACTTTTCCAGCAGGGAAGAAGCTTTTTGTGACGGTACCTGCAGAA  
GAAGCGCCGGCTAACTACGTG

>1615 len=142 tot-seq=10

TGGGGAATCTTCGCAATGGGCGAAAGCCTGACGGAGCAACGCCGCGTGAGTGAAGACGG

CCTTCGGGTTGTAAACCGCTTTCAGCAGGGACGAGGCCGCAAGGTGACGGTACCTGCAGA  
AGAAGCCCCGGCTAACTACGTG

>1616 len=143 tot-seq=10

CCATGTGAGGTTGCAGGAGGAGCACAGCTGAGCGTCAGGTATGAACTCCCTCCTGTAGAA  
CAATCAGAACTATCATATCCAATCAGAACTATCATGCTACCAGAGGATGCATCTTGTT  
AAGTCCATTGGTGGTTTTCTCTC

>1617 len=144 tot-seq=10

TGGGGAATATTGCACAATGGGCGCAAGCCTGATGCAGCGACGCCGCGTGGGGGATGACGG  
CCTTCGGGTTGTAAACTCCTTCGCAATCGACGAAGCCTTTTTTGGTGACGGTAGGTTGA  
GAAGAAGCACCGGCTAACTACGTG

>1618 len=153 tot-seq=10

TGGGGAATATTGCACAATGGGGGAAACCCTGATGCAGCGACGCCGCGTGAGTGAAGAAGC  
GTTTCGGCGCGTAAAGCTCTGTCAGCGGGGAAGAAACACGGTTCGCGAGAGCCGCGGACG  
GTACCCGACCAAGAAGCCCCGGCTAACTACGTG

>1619 len=155 tot-seq=10

TGAGGAATATTGGTCAATGGGCGGAAGCCTGAACCAGCCATGCCGCGTGAAGGAATAAGG  
CCCTATGGGTCGTAAACTTCTTTAGACGCAGAGCAATAAGGGTCTCGTGAGGCCCGATGA  
GAGTATGCGTAGAATAAGCATCGGCTAACTCCGTG

>1620 len=155 tot-seq=10

TGAGGAATATTGGTCAATGGTCGGAAGACTGAACCAGCCAAGCCGCGTGGAGGAAGAAGG  
CGCTAAGCGTCGTAAACTTCTTTGTCGGGGAACAAAATCCGGTACGCGTACCGGACCGA  
GCGTACCCGAAGAAAAAGCATCGGCTAACTCCGTG

>1621 len=155 tot-seq=10

TGAGGAATATTGGTCAATGGACGTAAGTCTGAACCAGCCAAGTAGCGTGCAGGATGACGG  
CCCTATGGGTTGTAAACTGCTTTTATGTGAGAATAAAGTTAACTACGTGTAGTTATTTGC  
ATGTATCACATGAATAAGGACCGGCTAATTCCGTG

>1622 len=155 tot-seq=10

TGAGGAATATTGGTCAATGGGCGGAAGCCTGAACCAGCCAAGTAGCGTGCAGGACGACGG  
CCCTACGGGTTGTAAACTGCTTTTATGCGGGGATAAAGTGAGGGACGTGTCCCTTTTTGC

AGGTACCGCATGAATAAGGACCGGCTAATTCCGTG

>1623 len=155 tot-seq=10

TGAGGAATATTGGTCAATGGAGGCAACTCTGAACCAGCCAAGTCGCGTGAAGGATGACTG  
CCCTACGGGTTGTAAACTTCTTTTTTAAGGGAATAAAGTGAGCCACGTGTGGCTTTTTGC  
ATGTACCTTACGAATAAGGATCGGCTAACTCCGTG

>1624 len=155 tot-seq=10

TGAGGAATATTGGACAATGGGTGCAAGCCTGATCCAGCCATCCCGCGTGAAGGATTAAGG  
TCCTATGGATTGTAAACTTCTTTTGTACAGGGATAAACCATTCTACGTGTAGGATGCTGA  
AGGTACTGTACGAATAAGCACCGGCTAACTCCGTG

>1625 len=156 tot-seq=10

TGAGGAATATTGGTCAATGGGCGAGAGCCTGAACCAGCCAAGTCGCGTGAGGGAAGGCGG  
TCCTATGGATTGTAAACCTCTTTTGTCTGGGGAGCAAAAAGGCCTCGTGAGGCCACAAGCG  
AGAGTACCCGAAGAAAAAGCATCGGCTAACTCCGTG

>1626 len=157 tot-seq=10

CTCCGATCTCTACGGGAGGCAGCGGGAAGAGAGGGAGACAGAGAAGAGCATTGTGTTGA  
GAGACACCTACTGTTAAAAGTAGTAAGAAAGAACAACCAAGTAAAATACAAATTTTAAGAA  
GGAAGACAGTCAGACATGGTGTCTCATGCCTGTAATC

>1627 len=159 tot-seq=10

TAGGGAATCTCCGCAATGGACGAAAGTCTGACGGAGCAATGCCGCGTGAATGAAGAAGG  
TCTTCGGATCGTAAAATTCTGTTGTTAGAGAAGAACAAGGAGTAGGTAATACTACTACTCCC  
TTGACGGTATCTAACCAGAAAGCCACGGCTAACTACGTG

>1628 len=160 tot-seq=10

TGGGGAATATTGCGCAATGGGGGAAACCCTGACGCAGCGACGCCGCGTGAGTGAAGAAGG  
ATTTGCGTTCGTAAACTCTGTTGTTAGGGAAGAAAAAATGTATAGTAACTATATACAAA  
AGAGACGGTACCTAACCAGAAAGCCACGGCTAACTACGTG

>1629 len=160 tot-seq=10

TGGGGAATATTGCACAATGGGCGCAAGCCTGATGCAGCAACGCCGCGTGAACGATGAAGG  
TCTTCGGATCGTAAAGCTCTGTTGTTGGTGAAGAAGGATAGAGGCAGTAACTGGCCTTTA  
TTTGACGGTAATCAACCAGAAAGTCACGGCTAACTACGTG

>1630 len=160 tot-seq=10

TAGGGAATCTCCGCAATGGACGAAAGTCTGACGGAGCAACGCCGCGTGAGTGAGGAAGG  
CCTTCGGGTCGTAAAGCTCTGTTGTGAGGGAAGAACAAGTGCCGGCGTAACTACCGGCAC  
CTTGACGGTACCTCACCAGAAAGCCACGGCTAACTACGTG

>1631 len=160 tot-seq=10

TGGGGAATATTGGACAATGGGCGCAAGCCTGATCCAGCCATGCCGCGTGTGTGAAGAAGG  
CCTTCGGGTTGTAAAGCACTTTTGTCCGGAAAGAAAAGTTCCCGGTTAATACCCGGGGAT  
CATGACGGTACCGGAAGAATAAGCACCGGCTAACTTCGTG

>1632 len=160 tot-seq=10

TGGGGAATATTGGACAATGGGCGAAAGCCTGATCCAGCCATGCCGCGTGTGTGAAGAAGG  
CCCTCGGGTTGTAAAGCACTTTCAGCGAGGAAGAACGCCTAGTGGTTAATACCCATTAGG  
AAAGACATCACTCGCAGAAGAAGCACCGGCTAACTCCGTG

>1633 len=160 tot-seq=10

TGGGGAATTTTGGACAATGGGGGCAACCCTGATCCAGCCATGCCGCGTGTATGAAGAAGG  
CCTTCGGGTTGTAAAGTACTTTTGTAGGGAAGAAAAGGGAAGTGCTAATACCACTTTTT  
GCTGACGGTACCTAAAGAATAAGCACCGGCTAACTACGTG

>1634 len=160 tot-seq=10

TGGGGAATCTCCGCAATGGACGAAAGTCTGACGGAGCAACGCCGCGTGAGTGATGAAGG  
TCTTCGGATTGTAAAGTGCTGTTATAAGGGAAGAACATTTGCAATAGGAAATGATTGCAG  
ACTGACGGTACCTTGTGAGAAAGCGATGGCTAACTATGTG

>1635 len=160 tot-seq=10

TGGGGAATATTGGACAATGGGGGAAACCCTGATCCAGCGACGCCGCGTGTGTGAAGAAGG  
CCTGCGGGTTGTAAAGCACTTTTAGTGGGGATGAAATGTGCAGGGCTAACACCTCTGCAT  
TTTGACCTAACCCACAGAAAAAGCACCGGCTAACTCTGTG

>1636 len=160 tot-seq=10

TGGGGAATTTTGGACAATGGGGGCAACCCTGATCCAGCAATGCCGCGTGTGTGAAGAAGG  
CCTTCGGGTTGTAAAGCACTTTTGTCCGGAAAGAAATCCCTTGCCCTAATACGGCGGGGG  
GATGACGGTACTGGAAGAATAAGCACCGGCTAACTACGTG

>1637 len=161 tot-seq=10



TAGGGAATTTTGCGCAATGGACGAAAGTCTGACGCAGCAATACCGTGTGAGGGATGAAGC  
ATTCGGTGTGTAAACCTCTGTGATGATGAATAAAGCATTGAGAGTGAAAGCTCGGG  
TGTTGAAGGTAATCATGAAGGAAGCACCGGCTAACTCTGTG

>1638 len=161 tot-seq=10

TAGGGAATCTTCGGCAATGGACGCAAGTCTGACCGAGCAACGCCGCGTGAGTGAAGACGG  
TTTTCGGATCGTAAAGCTCTGTTGTAGGGGAAGAACGTGTGTAAGAGTGAAAGCTTACA  
CAGTGACGGTACCCTACCAGAAAGGGACGGCTAACTACGTG

>1639 len=161 tot-seq=10

TGGGGAATATTGCACAATGGGCGCAAGCCTGATGCAGCGACGCCGCGTGAGGGATGGAGG  
CCTTCGGGTTGTAAAGCTCTGTTGTTAAGGAAGAACGAGTGTGAGAATGGAAAGTTCATG  
CTGTGACGGTACTTAACCAGAAAGGGACGGCTAACTACGTG

>1640 len=161 tot-seq=10

TAGGGAATCTCCACAATGGACGCAAGTCTGATGGAGCAACGCCGCGTGAGTGAAGAAGG  
GTTTCGGATTGTAAAGCTCTGTTAATCGGGACGAATGGTTTGTGTGCAAATAGTGCATAG  
ACATGACGGTACCGGAATAGAAAGCCACGGCTAACTACGTG

>1641 len=161 tot-seq=10

TTAGGAATATTCGTCAATGGGGGAAACCCTGAACGAGCAATGCCGCGTGAACGATGACGG  
CCCTATGGGTTGTAAAGTTCTGTTGTTTGGAAAGAACGATAGATAGAGGAAATGCTATAT  
ATGTGACGGTACCATTCAAGAAAGCCACGGCTAACTACGTG

>1642 len=162 tot-seq=10

TGAGGAATATTGGTCAATGGACGAGAGTCTGAACCAGCCAAGTAGCGTGCAGGATGACGG  
CCCTATGGGTTGTAAAGCTCTGTTATACGGGACGAACGGCAAGGTGGTAAATAGCCATCA  
TGAGTGACGGTACCGTAAGAGAAAGCCACGGCTAACTACGTG

>1643 len=168 tot-seq=10

GTATTTATTCTGAAAGGCTGTGTGTTCCAACAAGCATATATTAGCAGCTTCCAACCTCGGC  
CCCTAGGAATGATTCTCAGTTCTGAGCCGTGCTTCAGGAAAACATTCCCTACACAAACAA  
ACAAAAACATGAAGTCAGGTGTCTAAAGAGGAAAAATAACACTGTAC

>1644 len=173 tot-seq=10

TGGGCGTTACAATGCCTTTACCTATCTGAAGGACGTCTAGTGTAAACGAATGAGCCTCAGA

TATCAGAATGGCTGCAGCACTGACCCTGGGATCCGGAGAGAGGTTATAGAGGGACAGTCA  
GCAAAGCTGAGAAGGGGAGAGGGATCCTGCCTGAAGGGCAGATTCCAACCAGC

>1645 len=184 tot-seq=10

TGGGGAATATTGGGCAATGGAGGGAAGTCTGACCCAGCAACGCCGCGTGAGTGAAGAAGG  
TTTTCGGATTGTAAACTCTTTAAGCGGGGACGAAGAAAGTACTGTACCCGCAGAATAA  
GCATCGGCTAACTACGTGCCAGCAGCCGCGTAATAAACAGATCGGAAGAGCGTCGTGTAG  
GGAA

>1646 len=188 tot-seq=10

TCCATGGGTTTCGCACAGAGTCGGACATGACTAAGCAACTTCATTTTCACTTTTCACTTTG  
ATGCATTGGAGAAGGAAATGGCAACCCATTCCAGTGTCTTGCCTGGAGAATCCCAGAGA  
TGGGGAACCCTGGTGGGCTGCTGTCTATCGGGTCGCACAGAGTCGGAAACGACTAAAGTG  
ACTTAGCA

>1647 len=192 tot-seq=10

CCAGAGAGGCAGGAAGGGAATCAGTAGAGAAAGGAGACATGAGGCCACACAGGACAGGGG  
ACCCGGAAGTAAGACAAGCTCAGCAGGGTCAGGTCCCCAAGGTCGCTGCCTTGGATAGG  
GGAAGAAAAGTGTCTGCTGGTCTTAGCAAGGATAATGTCCTGCACAGTGAGGGTTATTCC  
AGCAATGCAGTG

>1648 len=213 tot-seq=10

GAGGAAAGCTGTCAGAGGGTGAGCCTGGCCCCGTGGCCGCTGGGGAGCAGCTATCTGAGC  
ACCCTGTGGAAGACCCTGAGAGCCTGGGTGTGGAGGCTGAAACCTGGATGAACAAGTCCC  
CAGACGGCATGTCACCTAAGAAGGAGACACCCAGCCCAGAGATGGAGACCGCAGCCCAA  
AGACAGTGCCAGCTGAAAGTCATGAGAAAGTCT

>1649 len=213 tot-seq=10

GCTAAGGGTAGGAACAGAGAACCGGGTATCTGGGAGCCTAGAACACCTGGGCATAAGGAG  
AGCCACCAATCCATGTCTCAGTCAGGGACCAGGCTAGGGGCAGATATAGAGAACCGGGTA  
CCTAGGAACCTGAAACACCTGAACCCAGGAGGCTAAAACCTGAGCAGACTCTGCAGAGTC  
ACCAGACAGAAGCTTAAGCATCCTTCAGAGACA

>1650 len=215 tot-seq=10

GAGAGTCAGCAGGAGGGACAGGGCACTGGGGACCAGCAGAAGACTCTTCGACAGAGGTGC

CTTATCTAGGAAGAAAACCCACATTCAGAATGACTGGGATTTTTCAAACAAAACAAACCA  
CTCACAAGATGAAAAGTGGGAGAGCTAATTTGTTTAGAATGAGGAGGAAGCTTAAGTCCT  
GCCACTCAGGCATTTAGCTCTTCTGAAACATCTA

>1651 len=215 tot-seq=10

GTTCCGGCCACCCCTGCCCAGCCCTGCAGCTGTACTGTGGGCTCGCCACCAGCCAGCAG  
GCAGACTGGGCCCTTCCCATGCCATGGTCTCCAGAGCCTCCTCCAGCTGCAGGTCTGG  
GATCTGAAGCTCAGCTGCCAGCTCATGGAGCTGTGCATCTTCTCCACAGAAGCCCCAGC  
CATGGATGGGGTGAGGCGGGTCTAGCCACATGGG

>1652 len=217 tot-seq=10

TGGGGTGAGCGCCAGCTGGTTTGGGTCTGTCCAAGAAGGTGAGACTAGCAATGCAGAGG  
GACCAAGATCAGGGTGCTTCTAAGGCCTTACCCTGGCTTGCTGCTCTGATGGACATTGT  
CTTAGGCATCATTTACGTCTAGCAAAGAGATATGCTGGTGATTTGAAATGTCTGGACGTC  
TAGCAAAGAGATATGCTGGTGATTTGAAATGTCTGGT

>1653 len=225 tot-seq=10

TGAGGAATATTGGTCAATGGGCGAGAGCCTGAACCAGCCAAGTAGCGTGAGGGATGACTG  
CCCTATGGGTTGTAAACCTCTTTTATTTGGGAATAACAGAAAGTATGTATACTTTTTTGC  
ATGTACCATAATGAATAAGCATCGGCTAACTCCGTGTGGGAATAACAGAAAGTATGTATA  
CTTTTTGCATGTACCATAATGAATAAGCATCGGCTAACTCCGTG

>1654 len=227 tot-seq=10

GATGCGAACAGATGTCAGTGGTGGCAGATCATTGCAATTCCTGTCTGCGTTCTGCATGCA  
TCCAAAAAGAGAACATGAACGTCTTCGAACTGAAATGAAGAAAATAATTTTGGAAATAC  
TCTTGGATGCCTGAGCTGGATGAGCACTCCTCAGAAACAATGAGGATCCAGTGAGGTGCA  
TGTGAGGACAGGAGGCTTGTGTTGGGGGTAGCATCCCCTTTCTCCTC

>1655 len=229 tot-seq=10

AGCTGGGACAGTTATGGATCACGACCAAGTCTAGGGCGCGACGCTGGGAGTGTGAAAAG  
CTGAGGGAAGAGCCCAGCAGAGCAAGGGAGCAGGGAGCTGAGGGAAGAGCCCAGCAGAGC  
GAGGGGGCAGGGAAGTGGTGCCTGCCCTGAGGCGAGCAAGGGAGCAGGGAGCTGAGGGA  
AGAGCCCAGCAGAGCGAGGGGGCAGGGAAGTGGTGCCTGCCCTGAGGC

>1656 len=230 tot-seq=10

GTGCTTGTTGATGCTGTGGAAATAAAAAGGTTTCCCGTTGATGAAGAACTGGCTCTCAGT  
GACAGCCACAGTGCGGATCCCCACAGGGAGTGTGTAGAAGTCAGACAAAGGCCCCAGTGA  
CGTCTGTGCAGTCAGCCGCACCTAAGATAGCCAAAGCGCCAGGTGTGAGCACCCCGACAG  
CTGAGCCCCATCCGGCCCTCCCTCTGGCAGGAAGGCCCTCGTGCACCC

>1657 len=230 tot-seq=10

TATGTGGCATCATAACGAGGAACGTATCATACTGGTACATATGATACCTAAGGTGGAGTG  
GTCGGCGTTCTGGAGGCGGCCGATAGCTTGCGCCTGATCCAGATGCCTAAAGGGCCAGT  
TGAGGGATATGAGGAGAATGAAGAGTTTCTGAGGACCATGCACCACCTGCTGCTGGAGGT  
GGAAGTGATAGAGGGCACCTGCAGTGCCCGGAATCTGGACGTATGTTCC

>1658 len=181 tot-seq=10

GCAGGTATATATTGTTTTACTACAACATAAAAATTAGATAAAAAGGTATATGGGGGAAAC  
AGATTCAGCAATGCTGTTTTCTTCTTCTTTAAGTGTATAACATTTTTACCCTCTTCC  
AGATGCAGCAGCCCCCAGCCCCAGCCCCCAGCCTCCCCAGCCCCAGCAGTCCTCGC

A

>1659 len=104 tot-seq=9

CATTAGTAAATGTAACAACACTAGTAACCTATCTATATCAACAGGATTTTCACCCTCTGTTA  
TCATTTTTATAATTCTTTCAACTAATACAGCAGTTTTTCCTGAG

>1660 len=106 tot-seq=9

TAAATGACTCAGACAAGGGAGGGAAAGGACCTCCAGCAGGGGACATAGGCAACAAAGAAA  
ATTAAAAATAGGTAAATTCTATAAAAATACAGCCAAGGAAGGGGGA

>1661 len=106 tot-seq=9

TGGGGAATATTGCGCAATGGGGGAAACCCTGACGCAGCGACGCCGCGTGCGGGATGAAGG  
CCTTCAGGTGAGTGTACCTTTCGAATAAGCGCCGGCTAACTACGTG

>1662 len=108 tot-seq=9

CACAGTCGGGATGAACTGGCAGGTGGGCTTCTGCTCCAGAAGAGATGCGGGAGCCCTGCA  
GGTTTGAGTGAAGAGTGCATGGTCCAACACGGTCTTCAGAGCATCGTT

>1663 len=110 tot-seq=9

GAGGAGGAGGATCAGGAGGACCAGCAGGAGCAGGAGGAGGAGAAGGAGGAGCAGGAGCAG  
GAGGACCAGCAGGAGCAGGAGGAGGAGCAGGAGCAGGAGGATCAGGAGGA

>1664 len=111 tot-seq=9

CAGAGCAGGTCAGGCAAGCCCACCTAGGAAGTCGGGGAGACGGGGCTTCCCACAGGTCCT  
GGGCCTAGCGCCTGTGTCCACTCATGAGCCCCACTGAGGAAAGGGGTTTGC

>1665 len=111 tot-seq=9

CAGGTTATTTTATTTTTTGCTTTAGACTTCTCATTAAAATATATGATATATACACAAGAG  
TGCATTATCAGCACATTTGACTTATCAATAACTGTACCCACCCACTGGAA

>1666 len=123 tot-seq=9

TAGGGAATCTTCCACAATGGGCGCAAGCCTGATGGAGCAACACCGCGTGAGTGAAGAAGG  
ACAGGGGTAGTAACTGACCTTTGTTTGACGGTAATCAATTAGAAAGTCACGGCTAACTAC  
GTG

>1667 len=124 tot-seq=9

GGGGACTCTGGGGCCTACTTGGAGGGGGCATGGGTGCTTACACCACAGCTTCTCAGGGA  
GCAATCACTATGAGGGTCTGGTAGAATCTAACTGAAGAGTGGGCAGCTGCAGGTATGGCT  
GAAG

>1668 len=129 tot-seq=9

CAGGAACTCAAACTGCAGCAGCAGCAGCAGCAGCAGCAGCAGGAGCCAGAGGAGCA  
GAAGCACCAGAAGCAGCAACAGCAGAAGCAGCAGCAACAGCAGCAGAAGCAGGGACAGAA  
TCACCAGCA

>1669 len=134 tot-seq=9

TGGGGAATATTGCGCAATGGGGGAAACCCTGACGCAGCGACGCCGCGTGATTTAGAAGGC  
CTTCGGGTTGTAAAATCTTTTTTATGGGATGAAAATGACAGTACCATAAGAATAAGGTC  
CGGCTAAATACGTG

>1670 len=135 tot-seq=9

TGGGGAATTTTTCGCAATGGGGGAGACCCTGACGCAGCAACGCCGCGTGCGGGACGAAGG  
CCTTCGGGTTGTAAACCGCTTTCAGCAGGGAATATAGTGAAGGTACCTGCAGAAGAAGCT  
CCGGCTAACTACGTG

>1671 len=135 tot-seq=9

TGGGGGATATTGCACAATGGGGGAAACCCTGATGCAGCGACGCCGCGTGAGTGAAGAAGT  
ATTCGGTATGTAACTTCTATCAGCAGGGAAGAAAATGACGGTACCTGAGTAAGAAGCA

CCGGCTAAATACGTG

>1672 len=135 tot-seq=9

TGGGGAATATTGCACAATGGGCGCAAGCCTGATGCAGCAACGCCGCGTGAACGATGAAGG

TCTTCGGATCGTAAAGTTCTGTTGCAGGGGAAGATAATGACGGTACCTTACTAAGAAGCT

CCGGCTAAATACGTG

>1673 len=135 tot-seq=9

TGGGGGATATTGCACAATGGGGGGAACCCTGATGCAGCGATGCCGCGTGAGTGAAGACGG

CCTTCGGGTTGTAAAGCTCTGTCGCAGGGGACGAAAATGACGGTACCCTGCAAGAAAGCT

CCGGCTAACTACGTG

>1674 len=135 tot-seq=9

TAGGGAATCTTCCACAATGGGCGAAAGCCTGATGGAGCAACGCCGCGTGGGTGAAGAAGG

TCTTCGGATCGTAAAGTTCTGTTGCAGGGGAAGATAATGACGGTACCCTGTGAGGAAGCC

CCGGCTAACTACGTG

>1675 len=136 tot-seq=9

TGGGGAATATTGCACAATGGGGGGAACCCTGATGCAGCGACGCCGCGTGAAGGAAGAAGT

ATCTCGGTATGTAAACTTCTATCAGCAGGGAAGAAAGAGGACGGTACCTGACTAGGAAGC

CCCGGCTAACTATGTG

>1676 len=136 tot-seq=9

TCGGGAATATTGCGCAATGGAGGAAACTCTGACGCAGTGACGCCGCGTATAGGAAGAAGG

TCTTCGGATTGTAAACTATTGTCGGTAGGGAAGAGAAAGGACAGTACCTAAGGAGGAAGC

TCCGGCTAACTACGTG

>1677 len=136 tot-seq=9

TCGAGAATCTTGGGCAATGCGCGAAAGCGTGACCCAGCAATGCCGCGTGTGTGATGAAGG

CCTTCGGGTCGTAAAGCACTGTCTCCCGTGACGAAATTTGACGGTAGCGGGGAAGGAAGC

CACGGCTAACTACGTG

>1678 len=137 tot-seq=9

CAAGGAATTTTCCGCAATGGGCGAAAGCCTGACGGAGCAACGCCGCGTGTGGGATGACGC

TTTTCGGAGTGTAAACCACTGTTTCATGGGGACGAAGCATTGACGGTACCCATGGAGGAAG

GCCCGGCTAACTACGTG

>1679 len=137 tot-seq=9

ACAGATAGAGGCAGCCGATGCCAGTGCAAGGGTTGCTGCCTGACAGGCATTGAACTGGAT  
ACTTCTCCATGCAGGGGCAGAAGGGCTGCTGTTGAGGTCTTGGGAAGACAACCTCGGTCAA  
GTACATGTGCTTCCGGC

>1680 len=137 tot-seq=9

TGGGGAATATTGCGCAATGGGGGCAACCCTGACGCAGCAATACCGCGTGAGTGAAGAAGG  
TTTTCGGATCGTAAAGCTCTGTTATTGGGGAAGAAAACATGACGGTACCCAATGAGGAAG  
TCCCGGCTAACTACGTG

>1681 len=137 tot-seq=9

TGGGGAATATTGGGCAATGGGCCAAGCCTGACCCAGCAACGCCGCGTGAAGGAAGAAGG  
CTTTCGGGTTGTAACTTCTTTTGTGTCAGGGAAGATGAACAGACTGTACCTGACGAATAAG  
CCACGGCTAACTACGTG

>1682 len=137 tot-seq=9

TGTCAGTGGACTTCCGGGTTCCAGGCTGGGAGAGGAGGGAGAGAAGTGGGAGCTGGAAG  
GCTCAAAGGTAACAGGAAGTATTTGCATTTTTAAGAGAGAGAGACCAAAGTGTGTTTCT  
AGGTTCCGGGAGAGAGAT

>1683 len=138 tot-seq=9

TGGGGAACATTGGGCAATGGGCGAAAGCCTGACCCAGCAACGCCGCGTGAAGGAAGAAGG  
CCCTCGGGTTGTAACTTCTTTTGTGTCAGGGACGAAGCAAGTGACGGTACCTGGCGAATAA  
GCCACGGCTAACTACGTG

>1684 len=138 tot-seq=9

TAGGGAATCTCCACAATGGACGCAAGTCTGATCCAGCAATTCTGTGTGTGTGAAGAAGG  
TTTTAGGACTGTAAACACTTTTAGTAGGGAAGAAAAAATGACGGTACCTACAGAAGAA  
GCAACGGCTAAATACGTG

>1685 len=138 tot-seq=9

TGCGGAATATTGGGCAATGGGCGAAAGCCTGACCCAGCAACGCCGCGTGAAGGAAGAAGG  
TCTTCGGATTGTAACTTCTTTTATGAGGGACGAAGGACGTGACGGTACCTCATGAATAA  
GCCACGGCTAACTACGTG

>1686 len=138 tot-seq=9

TGGGGAATTTTGTGCAATGGGGGAAACCCTGACACAGCGACACCCGCGTGAACGAAGAAGC  
CCTTTGGGGTGTAAAGTTCTGTGCGCTGGAACGAAAACAATGACGGTACCAGCAAAGGAA  
GCATCGGCTAACTACGTG

>1687 len=138 tot-seq=9

TAGGGAATCTTGACAATGGGCGAAAGCCTGATGCAGCAACGCCGCGTGAAGGATGAAGG  
CCTTCGGGTTGTAAACTTCTGTTCTAAGGGAAGAAACAATGACGGTACCTTAGGAGCAA  
GCCCCGGCTAACTACGTG

>1688 len=140 tot-seq=9

TGGGGAATATTGCACAATGGGCGCAAGCCTGATGCAGCGACGCCGCGTGAGGGATGACGG  
CCTTCGGGTTGTAAACCTCTTTCACCAGGGACGAAGCGTGAGTGACGGTACCTGGAGAAG  
AAGCACCGGCCAACTACGTG

>1689 len=143 tot-seq=9

TGGGGAATCTCCGCAATGGACGAAAGTCTGACGGAGCAACGCCGCGTGAGTGAAGAAGG  
TTTTCGGATCGTAAACCGCTTTTGATTGGGAGCAAGCCTTTTGGGTGAGTGTACCTTTCG  
AATAAGCGCCGGCTAACTACGTG

>1690 len=143 tot-seq=9

TGGGGAATATTGGGCAATGGGCGAAAGCCTGACCCAGCAACGCCGCGTGAAGTATGAAGG  
CCTTCGGGTTGTAAACCGCTTTTGATTGGGAGCAAGCCTTTTGGGTGAGTGTACCTTTCG  
AATAAGCGCCGGCTAACTACGTG

>1691 len=143 tot-seq=9

TGGGGAATATTGCACAATGGGCGCAAGCCTGATGCAGCGACGCCGCGTGGGGGATGACGG  
CCTTCGGGTTGTAAACCTCTTTCGACTATGACGAAGCCTTTTGGTGACGGTAGTGGTAG  
AAGAAGCACCGGCTAACTACGTG

>1692 len=143 tot-seq=9

TGGGGAATCTCCGCAATGGACGAAAGTCCGACGGAGCAACGCCGCGTGAGTGTGAAGG  
CCTTCGGGTTGTAAACCGCTTTTGATTGGGAGCAAGCCTTTTGGGTGAGTGTACCTTTCG  
AATAAGCGCCGGCTAACTACGTG

>1693 len=144 tot-seq=9

AGAACCTAAGTAAGGGAGGGCGAGCAAGGAAGCCGCTGCTCAGGAAGGAGGGGAGGAAAT



TAGAATGTCCAGAACATCTGGATGTATATGTCGGTCCAGAGGTTGCAGATCAAGTCACAG  
TTCCCACTTCAGCCAAGAGGAGTA

>1694 len=144 tot-seq=9

ACACCATAAACTTGGCCGAGGTAGCCTAGCCAAAGAGCTGACTGAAGACTATGAGCACAA  
CCAGACGTTTTTGGAGGAAGATTTACCATGCATTGCTTGAGGTTGATGTATTGGATGGCAC  
CCTGCAATGCCCAGAATCTTTTTTC

>1695 len=145 tot-seq=9

TAGGGAATCTTCCACAATGGACGCAAGTCTGATGCAGCGACGCCGCGTGAGGGATGGAGG  
CCTTCGGGTTGTAAACCTCTTTTGTAGGGAGCAAGGCATTTTGTGTTGAGTGTACCTTT  
CGAATAAGCACCGGCTAACTACGTG

>1696 len=145 tot-seq=9

GGAGAAATCGGAATGCAAATACGTGTTACATATATTAAGTTCTTTTTATGTGCTTGCCA  
CTATATCAAACACCTTACCTATGTAATTATTTATCCTCATGAGTTAGATATTTTTATTC  
CTGATGAGAAAACCTGGGTCATTTGC

>1697 len=151 tot-seq=9

TAGGGAATGGACGCAAGTCTGATGGAGCAACGCCGCGTGAGTGAAGAAGGGTTTCGGCT  
CGTAAAGCTCTGTTGTTGGTGAAGAAGGACAGGGGTAGTAACTGACCTTTGTTGACGGT  
AATCAATTAGAAAGGCACGGCTAACTACGTG

>1698 len=152 tot-seq=9

CAGGGAGCTCAGGTCCTTTGGAGAGCTGGCTCTACACAGCACCCCTGGAACCTCCTTTGGT  
CTGAGTCTAAGTGTGTTTCATGTTTGCCTCCTCTAGCGAGAAGCTTGCACTCCGTGGGAC  
AGGGGCCTCATCCCTTGCTCAGCACTGTACCT

>1699 len=155 tot-seq=9

TGAGGAATATTGGTCAATGGACGGAAGTCTGAACCAGCCATGCCGCGTGCAGGATGAATG  
TGCTATGCATTGTAACTGCTTTTGTACGAGGGTAAACACAGATACGCGTATCTGCTTGA  
AAGTATCGTACGAATAAGGATCGGCTAACTCCGTG

>1700 len=155 tot-seq=9

TAAGGAATATTGGTCAATGGAGGCAACTCTGAACCAGCCATGCCGCGTGCAGGAAGACGG  
CCCTACGGGTTGTAACTGCTTTTGTACCGGAATAAACCCCTTTACGTGTAAAGGGTTGA

ATGTACGGTAAGAATAAGGATCGGCTAACTCCGTG

>1701 len=155 tot-seq=9

TGAGGAATATTGGTCAATGGGCGTAAGCCTGAACCAGCCAAGTAGCGTGAGGGATGACTG

CCCTACGGGTTGTAAACCTCTTTTGTGGGAATAAAGTGCGGGACGCGTCCCGCATTGC

ATGTACCATTGAATAAGGACCGGCTAATTCCGTG

>1702 len=155 tot-seq=9

TGAGGAATATTGGACAATGGGCGCAAGCCTGATCCAGCCATGCCGCGTGAAGGATGAATG

TCCTCTGGATTGTAACTTCTTTATTTGGGACGAAAAAGAGCATTCTTGCTCACTTGA

CGGTACCAAGTGAATAAGCACCGGCTAACTCCGTG

>1703 len=155 tot-seq=9

TGAGGAATATTGGACAATGGATGGAAATCTGATCCAGCCATGCCGCGTGGAGGAAGAATG

TCCTATGGATTGTAACTTCTTTGTACGGGAGCAATAAGGGTCATGAATGGCCTGATGA

GAGTACCGTACGAATAAGCACCGGCTAACTCCGTG

>1704 len=155 tot-seq=9

TGAGGAATATTGGTCAATGGACGCAAGTCTGAACCAGCCAAGTAGCGTGCAGGATGACGG

CCCTATGGGTTGTAACTGCTTTTATATGGGGATAAAGTGGGGAACGTGTCATGCATTGC

AGGTACCACATGAATAAGGACCGGCTAATTCCGTG

>1705 len=155 tot-seq=9

TGAGGAATATTGGTCAATGGACGAGAGTCTGAACCGGCCAAGTAGCGTGAAGGAAGACTG

CCCTATGGGTTGTAACTTCTTTATAAGGGAATAAAGTCAGGTACGTGTACCTGTTTGT

ATGTACCTTATGAATAAGCATCGGCTAACTCCGTG

>1706 len=156 tot-seq=9

TGAGGAATATTGGTCAATGGGCGAGAGCCTGAACCAGCCAAGTCGCGTGAGGGAAGACGG

TCCTATGGATTGTAAAGCTCTTTTGTCTGGGGAGCAAAGGGGCCACGTGTGGTCAAAGGTG

AGAGTACCCGAAGAAAAGCATCGGCTAACTCCGTG

>1707 len=160 tot-seq=9

TAGGGAATCTCCGCAATGGGCGAAAGCCTGACGGAGCAACGCCGCGTGAGTGATGAAGG

TTTTCGGATCGTAAAGCTCTGTTGCCAGGGAAGAACGCTTGGGAGAGTAACTGCTCTTGA

GGTGACGGTACCTGAGAAGAAAGCCCCGGCTAACTACGTG

>1708 len=160 tot-seq=9

TGGGGAATATTGGACAATGGGCGCAAGCCTGATCCAGCCATGCCGCGTGTGTGAAGAAGG  
CCCTCGGGTTGTAAATCACTTTAGTGGGGAAGAAAGCCTGGTGGTTAATACCCGTCAGG  
AAGGACATCACCCACAGAAGAAGCACCGGCTAACTCCGTG

>1709 len=160 tot-seq=9

TGGGGAATATTGCACAATGGGGGAAACCCTGATGCAGCCATGCCGCGTGTGTGAAGAAGG  
CCTTCGGGTTGTAAAGCACTTTAGCGAGGAGGAAAGGTTGGTAGCTAATAACTGCCAAC  
TGTGACGTTACTCGCAGAAGAAGCACCGGCTAACTCCGTG

>1710 len=160 tot-seq=9

CTAAGAATATTCCGCAATGGGGGAAACCCTGACGGAGCGACGCCGCGTGGACGATGAAGG  
CCGGAAGGTTGTAAAGTCTTTTGCGGGTGAGGAATAAGGACCGGAGGGAATGCCGGTAC  
GATGACTGTAACCTGCGAATAAGCAACGGCTAATTACGTG

>1711 len=160 tot-seq=9

TAGGGAATCTTCGGCAATGGACGAAAGTCTGACCGAGCAACGCCGCGTGAGTGAAGAAGG  
TCTTCGGATCGTAAACTCTGTTGTTAGAGAAGAACACGAGTGAGAGTAACTGTCCATTC  
GATGACGGTATCTAACCAGCAAGTCACGGCTAACTACGTG

>1712 len=160 tot-seq=9

TAGGGAATATTGGACAATGGAGGGAACCTGATCCAGCAATTCTGTGTGTGTGAAGAAGG  
GTTTCGGCTCGTAAAGCTCTGTTGTTGGTGAAGAAGGACAGGGGTAGTAACTGACCTTTG  
TTTGACGGTAATCAATTAGAAAAGTCACGGCTAACTACGTG

>1713 len=160 tot-seq=9

TAGGGAATCTTCACAATGGACGCAAGTCTGATGGAGCAACGCCGCGTGAGTGAAGAAGG  
CCTTCGGGTTGTAAAGCACTTTAGCGGGGAGGAAGGCGTTAAGGTTAATAACCTTAGCG  
ATTGACGTTACCCGAGAAGAAGCACCGGCTAACTCCGTG

>1714 len=160 tot-seq=9

TAGGGAATCTTCGGCAATGGACGAAAGTCTGACCGAGCAACGCCGCGTGAGTGAAGAAGG  
TTTTCGGATCGTAAACTCTGTTATTAGGGAAGAACAATGTGTAAGTAACTATGCACGT  
CTTGACGGTACCTAATCAGAAAAGCCACGGCTAACTACGTG

>1715 len=160 tot-seq=9

TAGGGAATCTCCGCAATGGGCGAAAGCCTGACGGAGCAACGCCGCGTGAGTGATGAAGG  
TCTTCGGATCGTAAAACCTCTGTTATTAGGGAAGAACAAGGATGTAAGTAACTGTGCATCC  
CTTGACGGTACCTAATCAGAAAGCCACGGCTAACTACGTG

>1716 len=161 tot-seq=9

TAGGGAATATTGCACAATGGAGGAAACTCTGATGCAGCCATGCCGCGTGTGTGAAGAAGG  
TTTTCGGATCGTAAAGCTCTGTTGTTAGAGAAGAACGTTGGTAGGAGTGAAAATCTACC  
AAGTGACGGTAACTAACCAGAAAGGGACGGCTAACTACGTG

>1717 len=161 tot-seq=9

TGGGGAATATTGCACAATGGGCGCAAGCCTGATGCAGCAACGCCGCGTGAACGATGACGG  
CCTTCGGGTTGTAAAGTTCTGTTATACGGGACGAATGGTACGACGGTCAATACCCGTCGT  
AAGTGACGGTACCCTAAGAGAAAGCCACGGCTAACTACGTG

>1718 len=161 tot-seq=9

TAGGGAATCTCCGCAATGGACGAAAGTCTGACGGAGCAACGCCGCGTGAGTGAGGAAGG  
TTTTCGGATTGTAAAACCTCTGTTGTTAGGGAAGAACAAGTACCGTTTGAATAAGGCAGTA  
CCTTGACGGTACCTAACGAGAAAGCCCCGGCTAACTACGTG

>1719 len=161 tot-seq=9

TGGGGAATCTTGCGCAATGGGCGAAAGCCTGACGCAGCGACGCCGCGTGGGTGATGAAGG  
CCTTCGGGTTGTAAAGCCCTGTGGGGAGGAACGAACCGTGTCCGGGTGAATATCCCGGGC  
ACCTGACGGTACCTCTTTAGCAAGCATCGGCTAACTCTGTG

>1720 len=161 tot-seq=9

TGGGGAATCTCCGCAATGGACGAAAGTCTGACGGAGCAACGCCGCGTGAGTGAAGAAGG  
TTTTAGGATCGTAAAGCTCTGTTGTTTAGGACGAATGTGCCTTATGCGAATAGTATGAGG  
TAATGACGGTACTAACGAGAAAGCCACGGCTAACTACGTG

>1721 len=161 tot-seq=9

TGGGGAATCTTGCGCAATGGACGAAAGTCTGACGCAGCCACGCCGCGTGAGTGAAGAAGG  
CCCTCGGGTTGTAAAGCTCTGTCGCCCGGGACGAAAATTTATTGGGTTAATAGCCCAGTG  
AACTGACGGTACCGGGAGAGGAAGCACCGGCTAACTCCGTG

>1722 len=165 tot-seq=9

CTGGAGTTCAGACGTGTGCTCTTCGATCTCCTACGGAGGCAGCAGGTGCTGGGGACAAGC

TCACTGCTGAGAGTCGGTCTGGAGGATCTCATGGTGGTGCAGACCCTGGACCACATTGTC  
ACAGATGGTGTTACGCTGGTGCAAAGGTGAGAGGTGACAATGTG

>1723 len=167 tot-seq=9

ATCATAGGAGGATTTGGTGGGAGGTAAGCTTGGGGCTCAATGGGGGGTTCAGTATAGGATT  
CAAAGGGGGATCCATGGCAGAGTGGTTGGATGGCCAGAGTTGATGAGAGATCAGTGGAAG  
TTCAATGAGGGGCAATAAGAGAATGGATAAGAGTCAGTGAAGAGGGG

>1724 len=173 tot-seq=9

GATGAGCTATAAACAAGAAAACAGGTGAACGTCTCTTTAAGAAGCATTCTTAACAAATTC  
TATTCTTACTTGCCACTAGAGAAATTGATCCTCCTGACTCTGTAGTTAATTCTCTGGAG  
AGGGCAAAGAGCCTACAGGTGAGAGAACGAATCTTAACTCTGAAGATTGGAC

>1725 len=175 tot-seq=9

CCCCTTTCTCTTCTGACCAGGCGCCCATGCTTGCAAAGCCCATCTAAAACACTGGACAA  
AGTCAGCTCCCAGTTCAGATTCAAAGTAACCGCTGGACCTAAAGACCCACCTACAGGG  
CCCTAAACTTACCAAATGAATAACCATCACTTCACGACTCCCCTCCCCACTCCC

>1726 len=178 tot-seq=9

ACGGGAGGCAGCAGGCGCATAATCAGGAGGGGCCCTGAGTACCAGGGTCAGGACTTGGA  
GCTCATCTGCAAGGTAGTGGGGAGTTATAGAAGGAGATAGAGCTGGAGGGTGGGGCGCAG  
TAGCTTATGCCTGTACTCCAGCACTTTGGGAAGGTGAGGCAGGAGAATCTCTGAAGC

>1727 len=179 tot-seq=9

TAGGGAATCTTCCACAATGGACGCAAGTCTGACGGAGCAACGCCGCGTGAACGATGACGG  
CCTTCGGGTTGTAAAGTTCTGTTATATGGGACGAACAGGACATCGGCTAATACCCGGTGT  
CTTTGACGGTACCGTAAGAGAAAGCCACGGCTAACTACGTGACAGCAGCCGCGGTAATT

>1728 len=185 tot-seq=9

CATCACAAGACGGAGAATCCCCTTATGGCTGTTTTTTGTTTTTCTTTTTTTACCATT  
TGTAGGCAATAGCTGGCAACAGTGAAAAGGGAAAGGACTGCATAAAGAAGTTGAAGAATG  
GGGCTGGAGAGCCATCTCAGAGGTTAAGGGCACAGGCTTCTCTTGCAGAGGAGCTGGTTC  
TGTTCC

>1729 len=192 tot-seq=9

GAGGAGGGGGCTCTGCAGCCTGTGGAATGGCAATGTTTGTGCGTGCGTGCGTGCGTGCGTGCAT

GTGTGTGTGTATCCAAGTGAAGATTAAGCCCTGAAAGCAGGACTCAACCTTGCTCCCCCT  
CCCCATGCAATCACATCCTGCCTGTGACTGTGTACCTCCATCCCTCCAGCAGCCGCGA  
TAATCTCCAGAT

>1730 len=199 tot-seq=9

CGTGTGCTCTTCCGATCTCCACGGGAGGCAGCAGCAGGCTAGATGACCTTCCAGTGAGT  
GTGAGGGCAAGCAGGCAAAAACCCAAAACCTCCTTCTTCCCTTCTGTTATCTGGGCAC  
CAGAAGGTGCCACTCACATTTAGGGTGATTCTTCTTGCTTCAGATAATCCGAGGTCAAGA  
AAACCCACACAGAAGTGC

>1731 len=203 tot-seq=9

TGTCTTGACTCTGCCTATCGGTCCTATCTACCTGTTATGTCAGGACTGTTGGGATTCTG  
ACGCCTGAGGCTCTAGTTCAGTCAGTCAGGCTCTTAGGGTCATCAGCTCTGTAAAGTCTT  
CCCTAGAGGGAGGTTGTTGGAGGACGCACGGTTTACACTGCTCTTTTGCCTGTCTTGT  
TCTTTTGCCAGTACCATTAGGT

>1732 len=208 tot-seq=9

GGGTCCTTCTTTTATGTCCCCTCACTGCACAGGGAGCTAGCTCAGTATTCTTTTCTG  
ACCTGACATCTTTAGGGACAGGAACAGGAACCTTCTGCTGCCTGAACCACTGAGGCCTTTG  
GGAAGGTCTGGGACGCTGACCTCTCCTGTAGAAATGTGTGGGTCTTGCCTTCCCTGCC  
CCTGGTGGAGACCCTTCCACCCCTTGG

>1733 len=209 tot-seq=9

CTGAGGTAACGTGCAGCCCTGAGGCTGGTCCGAACGGGAGGAGACTTCTCCAGCAGCCCA  
GGTGCCAGTCCACACAGACAGGACTGGAAGCCCCTGGGCAGCAGGTCAGGTGACCCGGGG  
AGTGCAGCCTGAGCCCCAACGGCAGCAAACGTGAAGGTCTCAGGTGGTTACAGAATCAC  
TCAGCCCTCAGGCCCCCACCCTCTCCTC

>1734 len=210 tot-seq=9

TGGGGAATATTGCACAATGGGGGAAACCCTGATGCAGCGACGCCGCGTGAGCGAAGAAGG  
TATTCGTATCGTAAAGCTCTGTTGTAAGAGAAGAACGTGTGTGAGAGTGGAAGTTTACA  
CAGTGACGGTAACTTACCAGAAAGGGACGGCTAACTACGTGCCAGCAGCCCGCGGTAATG  
GCAAGATCGGAAGAGCGTCGTGTTGGGGAA

>1735 len=211 tot-seq=9

ATGGAGGACAGAGGGAATTGGGAGGAGATATCAACTGCAGTCCCCACAGACAGGCAGCC  
AACTTCACCACCCTCTAAGGCAGAACTCAACACTCTGACCAAGTCTCTAAAACAAAACAT  
TTACAAAGCCCATAGTAAAATAAAATATTGGTAGACATGTGAAGAAATAGAAAAATGGGA  
CTCAAAAAAAGAAAAGCAGTCATTAGAAACC

>1736 len=212 tot-seq=9

GAGGATGTGGGTCCCCAATGGAGTGGAGGCCTGGAAAGAGGGGACATGGGTGACGAGTCT  
TCGATACTGGAAGGGCAGCCTACCTGAGAGGAGCTGTTGAGGCCCCAGCCATGCCGCCCA  
CAGTCGAGGGTGCCCTGCAGGCCTCTGGCCCCAGGAAGGCAGGGCAGGAGTCCTGCATC  
CTTGCCAGCATGGCGGCCAGAAAGGTGAGAG

>1737 len=213 tot-seq=9

TGACTGGAGTTCAGACGTGTGCTCTTCCGATCTCCTATGGGAGGCAGCAGCTTGTCTCTG  
ACTACCCGGAGGACATGGAGCACCCCAAATAGGAACTTTAGAGGGATTGAAATCTGTTGC  
CTGTTCCACTAGGAATATTGTTTGCAAGGCACAAGGTGTCTTTTGGTAGTGAGCGCGCTC  
TGCGCATGCGCAGGTCCATTCGGAATTACTGC

>1738 len=223 tot-seq=9

GCTTTGTATGACCTGTAAATTACAACACTGACACCCCAAATAAGTCCAAGTGCATTTCGTCTT  
TCTAGGATTATTTATCAAATTCCTACATTTTTTCAAGCTGTTTAAGATACAAAGATTAAA  
AAAGAACGATTTTTTAACCTATCGCATCTCCAGTTTGGTGTAATAGAAAGTAAAATAAAA  
GGATGACAGTAATACAGAGTAAAAAGTGATATGAATGTAAG

>1739 len=223 tot-seq=9

GATAGATGGACACACAGATGGTTGGACAGAGAGATGCATGGATATAGGCCTAGTGCATAA  
CAGGCAGTCAATAATGATGGGCAGATGGAAGGGTGGATGGATATCTAGGGAGCAAAGCAC  
CTGGGATGAAATGTGCACAAAGCACAACCTCAAAGTGCAAAGATACGAGAGCCTCCTTA  
AGTGGCACCTCTAAAACCTCCACTTCATTTTCATCTCAGACCAA

>1740 len=230 tot-seq=9

TGGGTTTTTTTTTCAAGCAGAAGACGGCAGACGAGAGCGACAAGGGACGGGAGGGCAGA  
CGGGGGCGCGCCGAGCGCCGACGGGAGGCAGCAGGGGGGAAGAGGGCACAAGGGGCGAA  
AGCCTGATGCAGCGACGCCGCGTGAGCGAAGAAGTATTTCCGGTAGGTAAAGCTCTATCAG  
AAGGGAAGAAAATGACGGTACCTTACTAAGAAGCTCCGGCTAAATACGTG

>1741 len=239 tot-seq=9

ACTGGTCGAAAGGAGAGGAACATGGTAGGCAGGAGGAAGATGCATAGTGCCAGGGCCAGA  
AATATGAAGCCCTTGCCCATGTGAATGTAAACTGGGGAAGAAATTTAGAAAGATAACTAC  
AGGACTTAGTCATTCTAACCTCGCTCTCTCCCTCTCTCCCTCTCTCTCTCTCCCTAGA  
TCTCTCCCTAATTCTCTCTCTCTTTCCTCTCACAGCATGAGGAGTTCAACCTCAGTACT

>1742 len=240 tot-seq=9

CTGGGGCCCTCTGCTTGTCTAGCACCTACAGCGTTGAGACTTTTGCACCCACCCAAGTG  
TGGACGTGGAGGCTGGGGGCCAAGGTCTCTGGTGACTGGACATCAGGGGGCAGGGGACAG  
ACCTCCCCCTCACTCCAGGGAGTTCCTTTCTCCAATTCTTTGCCCTCGGCACACCTCCCC  
GGGCAGCCAGGAACCTCCCCGGGCAATGCCGGGCAAGGCCTCCCCTCCACAGAGAAAC

>1743 len=161 tot-seq=9

TGGGGAATATTGCGCAATGGGGGAAACCCTGACGCAGCGACGCCGCGTGCGGGATGAAGG  
CCTTCGGGTTGTAAAGCTCTGTTATACGGGACGAACGGCAAGGTGGTAAATAGCCATCAT  
GAGTGACGGTACCGTAAGAGAAAGCCACGGCTAACTACGTG

>1744 len=135 tot-seq=9

TGGGGAATATTGCACAATGGGGGAAACCCTGATGCAGCGACGCCGCGTGAGTGAAGAAGT  
ATTTCGGTATGTAAAGCTCTATCAGCAGGGAAGAAAAGACGGTACCTGACTAAGAAGCC  
CCGGCTAACTACGTG

>1745 len=155 tot-seq=9

TGAGGAATATTGGTCAATGGACGGAAGTCTGAACCAGCCAAGTAGCGTGCAGGATGACGG  
CCCTATGGGTTGTAAACTGCTTTTATATGGGAATAAAGTGAGGCACGTGTGGCTTTTTGC  
AGGTACCGTATGAATAAGGACCGGCTAATTCCGTG

>1746 len=160 tot-seq=9

TGGGGAATATTGGACAATGGGCGAAAGCCTGATCCAGCCATGCCGCGTGTGTGAAGAAGG  
TCTTCGGATTGTAAAGCACTTTAAGTTGGGAGGAAGGGCAGTAACCTAATACGTTGCTGT  
TTTGACGTTACCGACAGAATAAGCACCGGCTAACTCTGTG

>1747 len=106 tot-seq=8

ATCACTGGAGGTCAGGAGTTTGATACCAGCCTCGCCAATGTGGTGAAACCCCATCTATAC  
TATAAATACAAAATTAGCCGGGCATGGTGGCGCACGCCTATAATC



>1748 len=107 tot-seq=8

AGGCAGCAGCAGCAGAGGCAGCAGAGGCAGCACCAGCAGCAGCAGAGGCAGCAGAGGCAG  
CAGCAGCAGAGGCAGCAGAGGCAGCAGCAGCAGAGGCAGCACCAGCA

>1749 len=109 tot-seq=8

ACACGGGCAGAAATGGGTTAGGGCTATGCATCTCATGGTCCACCCTCAATGACTAGCTTC  
CTACCAACAGGCTCTACTTCCTAAAGGTTTCATATGTCCCAGTACATTG

>1750 len=110 tot-seq=8

TGGTGTCTGGGAGAACATCTTGGCTCCAGAAGGCTGCGTGCTGGAAACGTACCTCTCTACA  
CCCATGCTTGATCTCTGCTGCTGCCTGGGCCAGCAGCTAATCCCGCCTGG

>1751 len=112 tot-seq=8

CAAAGTCTGTGGCAAGGCTGCATCCTCAAGGGGGAGGGCAGGTAGTGGGCAGGTAGAAGA  
AGCACATCATCAGATATGCTCCTGAGCACAGGTGAGATACTTTTTGGGACTC

>1752 len=117 tot-seq=8

AGTGAGTGAGAGGGGAGGTCAGGGGAGTCACAGCTTACCAGATGGACTGGAAATTCCTT  
ACTCTCTCCCTTCACTGCGATCGAAGGCGCCCTGGCAAATCCAGGAGACAGCTCCGC

>1753 len=119 tot-seq=8

TACCAAGGACAAACATCTCAGCATCCAATAAACTTGAGAATGTTTCTCTTTTTGTTGCA  
AGGCTGGTTGCTATTTCTGCGCGCCCATGTTTATGGACGCGCCGGCTCCTCCGGTGT

>1754 len=135 tot-seq=8

TGGGGAATATTGGACAATGGGGGAAACCCTGATCCAGCAATGCCGCGTGAATGAAGAAGG  
CCTTAGGGTTGTAAAGTTCTTTCACCTGTGAAGATAATGACGGTAGCAGGAGAAGAAGCC  
CCGGCTAACTCCGTG

>1755 len=135 tot-seq=8

TGGGGAATATTGGGCAATGGGGGAAACCCTGACCCAGCGACGCCGCGTGAGGGAAGAAGG  
TTTTCGGATTGTAAACCTCTGTCCTTGGTGACGATAATGACGGTAGCCAAGGAGGAAGCC  
ACGGCTAACTACGTG

>1756 len=135 tot-seq=8

TGGGGAATATTGCACAATGGGGGAAACCCTGATGCAGCGACGCCGCGTGAGTGAAGACGG  
CCCTCGGGTTGTAAAGCTCTGTGATAGGGGACGATAATGACGGTACCCTGTCAGAAAGCC

ACGGCTAACTACGTG

>1757 len=135 tot-seq=8

TGGGGAATTTTGCACAATGGAGGCAACTCTGATGCAGCGACGCCGCGTGAAGGATGAAGG  
TTTTCGGATTGTAACTTCTGTCCTTGGAGATGATAATGACAGTATCCGAGGAGGAAGCC  
CCGGCTAACTACGTG

>1758 len=135 tot-seq=8

TAGGGAATCTTCGGCAATGGACGGAAGTCTGACCGAGCAACGCCGCGTGAGTGAAGAAGG  
TCTTCGGATCGTAAAGTTCTGTTGCAGGGGAAGATAATGACGGTACCCTGTGAGGAAGCC  
CCGGCTAACTACGTG

>1759 len=135 tot-seq=8

TGAGGAATATTGGTCAATGGGCGAGAGCCTGAACCAGCCAAGTCGCGTGAACGATGAAGG  
TCTTCGGATCGTAAAGTTCTGTTGCAGGGGAAGATAATGACGGTACCCTGTGAGGAAGCC  
CCGGCTAACTACGTG

>1760 len=135 tot-seq=8

TAGGGAATATTGCACAATGGGGGGAACCCTGATGCAGCGACGCCGCGTGAGTGAAGAAGT  
ATATCGGTATGTAAAGCTCTATCAGCAGGGGAAGAAGATGACGGTACCCTGAGTAAGAAGCC  
CCGGCTAACTACGTG

>1761 len=135 tot-seq=8

TGGGGGATATTGCACAATGGGCGAAAGCCTGATGCAGCGACGCCGCGTGAGGGAAGACGG  
TCTTCGGATTGTAAACCACTGTCTTCGGGGACGATAATGACGGTACCCGAGGAGGAAGCT  
CCGGCTAACTACGTG

>1762 len=135 tot-seq=8

TGGGGAATATTGCACAATGGGGGGAACCCTGATGCAGCGACGCCGCGTGAATGAAGAAGG  
TCTTCGGATCGTAAAGTTCTGTCGCGAGGGACGATAGTGACGGTACCCTCGTGAGGAAGCC  
ACGGCTAACTACGTG

>1763 len=135 tot-seq=8

TGGGGAATATTGACAATGGGCGCAAGCCTGATCCAGCCATGCCGCGTGGATGATGAAGG  
CCTTAGGGTTGTAAAGTCCTTTAACGGGGAAGATAATGACGGTACCCGTAGAATAAGCC  
CCGGCTAACTTCGTG

>1764 len=135 tot-seq=8

TGGGGAATCTCCGCAATGGACGAAAGTCTGACGGAGCAACGCCGCGTGAGTGAAGACGG  
TCTTCGGATTGTAAAGCTCTGTTGCAGGGGAAGATAATGACGGTACCCTGTGAGGAAGCC  
CCGGCTAACTACGTG

>1765 len=136 tot-seq=8

TGGGGAATATTGGGCAATGGAGGAAACTCTGACCCAGCAACGCCGCGTGAAGGATGAAGG  
TCTTCGGATTGTAAACTTCTGTTGTTAGGGACGAAGAATGACGGTACCTAACGAGAAAGC  
CCCGGCTAACTACGTG

>1766 len=136 tot-seq=8

TCGGGAATTTTGCGCAATGGAGGAAACTCTGACGCAGTGACGCCGCGTATAGGAAGAAGG  
TTTTCGGATTGTAAACTATTTTAGTCAGGGAAGAAAAATGACAGTACCTGAAGAATAAGC  
TCCGGCTAACTACGTG

>1767 len=136 tot-seq=8

TGGGGAATCTTGCGCAATGGGCGAAAGCCTGACGCAGCAACGCCGCGTGGGGGATGAAGG  
CTTTCGGGTTGTAAACCCCTTTCAGCAGGGACGAATCAAGACGGTACCTGCAGAAGAAGC  
CCCGGCTAACTACGTG

>1768 len=136 tot-seq=8

TGGGGAATATTGGGCAATGGGCGCAAGCCTGACCCAGCAACGCCGCGTGAAGGATGAAGG  
TTTTCGGATTGTAAACTTCTGTCGCGAGGGACGAAGAATGACGGTACCTCGTAAGAAAGC  
CCCGGCTAACTACGTG

>1769 len=138 tot-seq=8

TAGGGAATCTCCACAATGGACGCAAGTCTGATGGAGCAACGCCGCGTGAGTGAAGAAGG  
GTTTCGGGTTGTAAAGCACTTTCGGAGGGGAGGAAAAAATGACGTTACCCTCAGAAGAA  
GCACCGGCTAACTCCGTG

>1770 len=138 tot-seq=8

TAGGGAATCTTGACAATGGGCGAAAGCCTGATGCAGCAACGCCGCGTGAAGGATGAAGG  
CCTTCGGGTCGTAAACTTCCGTTCTTAGGGAAGAAAAAATGACGGTACCTAAGGAGGAA  
GCCCCGGCTAACTACGTG

>1771 len=138 tot-seq=8

TGGGGAATATTGGGCAATGGGCGAAAGCCTTACCCAGCAATGCCGCGTGAGTGAAGAAGG  
TCTTCGGATTGTAAAGCTCTTTGATCAGGGACGAACACAATGACGGTACCTGAAGAACAA  
GCCCCGGCTAACTACGTG

>1772 len=139 tot-seq=8

TGGGGAATATTGGGCAATGGAGGCAACTCTTACCCAGCAATGCCGCGTGAATGAAGAAGG  
TCTTCGGATTGTAAAGTTCTTTAATTGGGGACGAAAAAAATGACGGTACCCAAGGAATA  
AGCCCCGGCTAACTACGTG

>1773 len=139 tot-seq=8

TAGAAATGTATGCAAAATGGGTGGATTGGGAAGCTGGGAGAATGGTACCTATATAATGAAT  
TAATATAAGGGGAACAAAAATGAGAACTGTGAAGTTACTAATTTATATACAGCCAAATA  
ATCTGTATTATGCAATAAC

>1774 len=142 tot-seq=8

TGAGGAATATTGCACAATGGGCGCAAGCCTGATGCAGCGACGCCGCGTGAGGGATGGAGG  
CCTTCGGGTTGTAAACCGCTTTCAGCAGGGACGAGGCCGCAAGGTGACGGTACCTGCAGA  
AGAAGCCCCGGCTAACTACGTG

>1775 len=142 tot-seq=8

GGATCCACGGCCAAATCCTGGGAAAAGAGCCCATGAATGGGCATCTCAGAGTGGCCACCT  
TCTGACTGCCCTCCCTCTTCCCTTTCCTACATTCTGCCTGAAGGGAAGGAGGGGCAGCT  
CCAGGGGAGGTAACTGCAGTC

>1776 len=143 tot-seq=8

TGGGGAATATTGCACAATGGGCGCAAGCCTGATGCAGCAACGCCGCGTGAACGATGAAGG  
TCTTCGGGTTGTAAACCGCTTTTGATTGGGAGCAAGCCTTTTGGGTGAGTGTACCTTTCG  
AATAAGCGTCGGCTAACTACGTG

>1777 len=143 tot-seq=8

TGACGGAGCAGGAAGGAGAGGACAGAAGCAAGGGCCCCTTGGAGGGGAGAACTGGAGGGG  
CTGGGAAGCTCCTGGAATATTGGTGGCTGGGAGGTGGGAGAGATCAGACGGCTTGAATTT  
CATAGCTGAGATATGATGGTGCT

>1778 len=143 tot-seq=8

CAGTGGGGAATATTGGACAATGGGCGGAAGCCTGATCCAGCAACGCCGCGTGAGGGATGA

CTGCCTTCGGGTTGTAAACCTCTTTCAGTACCGACGAAGCGAGAGTGACGGTAGGTACAG  
AAGAAGCACCGGCCAACTACGTG

>1779 len=144 tot-seq=8

TGGGGAATATTGCACAATGGGCGCAAGCCTGATGCAGCGACGCCGCGTGAGGGATGACGG  
CCTTCGGGTTGTAAACCTCTTTCAGTAGGGAAGAAGGCCTTCGGGTTGACGGTACCTGCA  
GAAGAAGCGCCGGCTAACTACGTG

>1780 len=144 tot-seq=8

CAACAGAGGCCCTGAGAAGGAACCCAGACCCAGCACCAGCGGAGATGCACATATTCCGCC  
TCACATGGAATCAGAAGCAACGCCCTACTTTACAGCTGAGAACACTGAGGCTCCAAGAG  
GTTCTGGGATGTGCTCTACGTAC

>1781 len=146 tot-seq=8

TGGGGAATATTGCACAATGGGCGCAAGCCTGATGCAGCGACGCCGCGTGGGGGATGAAGG  
CCTTCGGGTTGTAAACTCCTTCGCTAGGGACGAAGCCTTTTTTAAGGTGACGGTACCTG  
GATAAGAAGCACCGGCTAACTACGTG

>1782 len=150 tot-seq=8

GGGAGGCAGCGGTGGGGAATATTGCACAATGGGCGCAAGCCTGATGCAGCAACGCCGCGT  
GAGCGAGGAAGGCCTTTGGGTCGTAAAGCTCTGTCCTTGGGGAAGAAACAAATGACGGTA  
CCCTTGGAGGAAGCCCCGGCTAACTACGTG

>1783 len=151 tot-seq=8

TTTATCCGTGACTGGAGTTCAGACGTGTGCTCTCCCGACCCGGGGAGGTAGTGACGAAAA  
ATAACAATACAGGACTCTTCGAGGCCCTGTAATTGGAATGAGTCCACTTTAAATCCTTT  
AACGAGGATCCATTGGAGGGCAAGTCTGGTG

>1784 len=153 tot-seq=8

GCCCAGTGCTTCAGGGCAGCTCTCCTTGTGGCCGCTGACGCCAGGACGGACTTGGGCCA  
CCAGTGCCAGAGGAGAGAGAAGCGGCACCAGAGACAAGGCGATGCTTCAAATCATCTGT  
TCTCAGTTGCTGACTCAGACGCCTCCTTCTGTG

>1785 len=153 tot-seq=8

TGGGGAATATTGCGCAATGGGGGAAACCCTGATGCAGCGACGCCGCGTGAGTGAAGAAGT  
ATTCGGTATGTAAAGCTCTATCAGCAGGGAAGAAATACTGACCATAGGGTCAGCAGACG

GTACTTGACTAAGAAGCCCCGGCTAACTACGTG

>1786 len=153 tot-seq=8

GGGAGGGCAGCAGTGGGGAATATTGCACAATGGGCGCAAGCCTGATGCAGCGACGCCGCG

TGGGGGATGACGGCCTTCGGGTTGTAAACCTCTTTCGACAGGGACGAAGCTTTGGTGACG

GTACCTGTATAAGAAGCACCGGCTAACTACGTG

>1787 len=153 tot-seq=8

GGTCAGGACCACCACTCAGTGGTATAGGACTGTGTGAATTTCAAAAAGATTCCCCTTC

CTGAGACCCTCTGACCCAGCTGGATGTTTTGTGCAGTGAACAGCCTGCCCGCCATCT

AAGGCAGCCAAAGCAAGCTCTGTGTTGGTATCT

>1788 len=155 tot-seq=8

TGAGGAATATTGGTCAATGGGCGGAAGCCTGAACCAGCCAAGTAGCGTGAGGGATGACTG

CCCTATGGGTTGTAAACCTCTTTTATAAGGGAATAAAAACGCGGACGTGTCCTGTTTTGC

ATGTACCTTATGAATAAGGACCGGCTAATTCCGTG

>1789 len=155 tot-seq=8

TGAGGAATATTGGTCAATGGGCGAGAGCCTGAACCAGCCAAGTAGCGTGAGGGACGACTG

CCCTATGGGTTGTAAACCTCTTTTGTGGGAATAAAGTGCGGGACGTGTCCCGCATTGC

ATGTACCATTTGAATAAGGACCGGCTAATTCCATG

>1790 len=155 tot-seq=8

TGGGGAATATTGCGCAATGGGGGAAACCCTGACGCAGCGACGCCCGTGCAGGATGACGG

CCCTATGGGTTGTAAACTGCTTTTGTATGGGGATAAAGTTAGGGACGTGTCCCTATTTGC

AGGTACCATACGAATAAGGACCGGCTAATTCCGTG

>1791 len=155 tot-seq=8

TGAGGAATATTGGTCAATGGGCGAGAGCCTGAACCAGCCAAGTCGCGTGAAGGAAGACGG

TCCTACGGATTGTAAACTTCTTTTGTACAGGAATAACAGGTTTTACGTGTAGAATTATGC

ATGTACTGTACGAATAAGCATCGGCTAACTCCGTG

>1792 len=155 tot-seq=8

TGAGGAATATTGGTCAATGGGCGAGAGCCTGAACCAGCCAAGTCGCGTGAAGGAAGACGG

CCCTATGGGTTGTAAACTTCTTTTGCAGGGGAATAAAGATATCCACGAGTGGATAGTTGT

ATGTACCCTGCGAATAAGCATCGGCTAACTCCGTG

>1793 len=155 tot-seq=8

TGAGGAATATTGGTCAATGGAGGCAACTCTGAACCAGCCAAGTCGCGTGAAGGACGACGG  
TCCTAAGGATTGTAACTTCTTTAGTAGGTGAGTAGAGACAGGTACGTGTACCTGTAGGC  
AAGTAACCTAAGAATAAGTATCGGCTAACTCCGTG

>1794 len=155 tot-seq=8

TGAGGAATATTGGTCAATGGGCGGAAGCCTGAACCAGCCAAGTAGCGTGAAGGAAGACTG  
CCCTATGGGTTGTAACTTCTTTTATGCGGGGATAAAGTTCGCCACGTGTGGCGTTTTGC  
AGGTACCGCATGAATAAGGACCGGCTAATTCCGTG

>1795 len=155 tot-seq=8

TAAGGAATATTGGACAATGGAGGCAACTCTGATCCAGCCATGCCGCGTGAAGGATGAAGG  
TCTTCTGGATTGTAACTTCTTTTATGGGGGGCGAAAAGTGTTTTTTTAAGACAATTGA  
CGGTACCTTATGAATAAACACCGGCTAACTCCGTG

>1796 len=155 tot-seq=8

TGGGGAATATTGGTCAATGGACGCAAGTCTGAACCAGCCAAGTAGCGTGCAGGATGACGG  
CCCTATGGGTTGTAACTGCTTTTATGTGGGGATAAAGTGCATGACGTGTCATGCATTGC  
AGGTACCACATGAATAAGGACCGGCTAATTCCGTG

>1797 len=155 tot-seq=8

TGAGGAATATTGGTCAATGGACGAGAGTCTGAACCAGCCAAGTAGCGTGAAGGATGACTG  
CCCTATGGGTTGTAACTTCTTTTATATGGGAATAAAGTGCAGTATGTATACTGTTTTGT  
ATGTACCATACGAATAAGGATCGGCTAACTCCGTG

>1798 len=155 tot-seq=8

TAAGGAATATTGGTCAATGGAGGGAAGTCTGAACCAGCCATGCCGCGTGCAGGAAGACAG  
CCCTCTGGGTCGTAACTGCTTTTATTCGGGAATAAACCTTTCTACGTGTAGGAAGCTGA  
ATGTACCGAAGGAATAAGGATCGGCTAACTCCGTG

>1799 len=155 tot-seq=8

TGAGGAGTATTGGTCAATGGACGCAAGTCTGAACCAGCCATGCCGCGTGCAGGAAGACGG  
CTCTATGAGTTGTAACTGCTTTTGTACGAGGGTAAGCTCACCTACGTGTAGGTGACTGA  
AAGTATCGTACGAATAAGGATCGGCTAACTCCGTG

>1800 len=156 tot-seq=8

TGAGGAATATTGGTCAATGGGCGGGAGCCTGAACCAGCCAAGTCGCGTGAGGGAAGACGG  
TCCTATGGATTGTAAACCTCTTTTGTGAGGGAGCAATCCCGCCACGCGTGCGGGGAGGG  
AGAGTACCTGAAGAAAAAGCATCGGCTAACTCCGTG

>1801 len=156 tot-seq=8

TGAGGAATATTGGTCAATGGGCGGAAGCCTGAACCAGCCAAGTCGCGTGAGGGAAGACGG  
CCCTACGGGTTGTAAACCTCTTTTGCCGGGGAGCAATGCCAGCTCGCGAGCTGGGAAGG  
AGAGTACCCGAGAAAAAGCATCGGCTAACTCCGTG

>1802 len=156 tot-seq=8

TGAGGAATATTGGTCAATGGGCGCAAGCCTGAACCAGCCAAGTCGCGTGAGGGAAGACGG  
TCCTATGGATTGTAAACCTCTTTTGCCGGGGAGCAAGGCATCTCTCGTGAGGGATGTCGG  
AGAGTACCCGAGAAAAAGCATCGGCTAACTCCGTG

>1803 len=158 tot-seq=8

TTCTCAAAGCCTCAGTCATGTGGCCCCGTAGATTATTGGCTATCCTAGCTCGGCTAGAT  
TGGCCAAATATGGTGATGTTTGCCTGGGAAAAGCACAGGTAGATATTGCCCTTACGCAGC  
AGCTAAGCCTAATCAACAGTGTAGGTGAGCAGGTAGTA

>1804 len=159 tot-seq=8

TGGGGAATATTGGACAATGGGCGAAAGCCTGATCCAGCAATACCGCGTGTGTGAAGAAGG  
CCTTCGGGTTGTAAAGCACTTTAAGTTAGGAAGAAAAAGCTTCACCTAATACGTGAAGCC  
TTGACGGTACCAACAGAATAAGCACCGGCTAACTCTGTG

>1805 len=159 tot-seq=8

TAGGGAATCTCCGCAATGGACGCAAGTCTGACGGAGCAACGCCGCGTGAGTGACGAAGG  
TTTTCGGATCGTAAACTCTGTTGTGAGGGAAGAACAAGTACCAAGTAACTACTGGTACC  
TTGACGGTACCTCACCAGAAAGCCACGGCTAACTACGTG

>1806 len=159 tot-seq=8

CGGGGAATTGTTACAATGGGCGCAAGCCTGATGACGCAACGCCGCGTGAGGATGAAGG  
TCTTCGGATTGTAAACTCCTGTTGCTCGGGACGAAAAGCCTCGACCCAATACGTGAGGT  
CTGACGGTACCGAGTGAGGAAGCCCCGGCTAACTCTGTG

>1807 len=159 tot-seq=8

TGGGGAATTGTTGCAATGGGCGCAAGCCTGACGACGCAACGCCGCGTGAGGATGAAGG



TCTTCGGATTGTAACTCCTGTTGCTCGGGACGAAAAGCTTCGACCTGACACGTCAAGT  
CTGACGGTACCGAGTGAGGAAGCCCCGGCTAACTCTGTG

>1808 len=160 tot-seq=8

TAGGGAATCTTCGGCAATGGACGGAAGTCTGACCGAGCAACGCCGCGTGAGTGAAGAAGG  
GTTTCGGCTCGTAAACTCTGTTGTTGAAGAAGAACGTGCGTGAGAGTAACTGTTACGT  
TTCGACGGTATCTAACCAGAAAGCCACGGCTAACTACGTG

>1809 len=160 tot-seq=8

TGGGGAATATTGCACAATGGGGGAAACCCTGATGCAGCGACGCCGCGTGAACGAAGAAGG  
TATTCGTATCGTAAAGTACTTTTCAGCGGGGAGGAAGGGAGTAAAGTTAATACCTTTGCTC  
ATTGACGTTACCCGCAGAAGAAGCACCGGCTAACTCCGTG

>1810 len=160 tot-seq=8

CGAGGAATATTGGTCAATGGGCGCAAGCCTGATGCAGCCATGCCGCGTGATGAAGAAGG  
CCTTCGGGTTGTAAAGTACTTTTCAGCGGGGAGGAAGGGAGTAAAGTTAATACCTTTACTC  
ATTGACGTTACCCGCAGAAGAAGCACCGGCTAACTCCGTG

>1811 len=160 tot-seq=8

TGGGGAATTTTGCACAATGGGGGAAACCCTGATGCAGCGACGCCGCGTGATTTAGAAGGC  
CTTCGGGTTGTAAAGCTCTGTTGTTAAGGAAGAACGAGTGTGAGAATGGAAAGTTCATGC  
TGTGACGGTACTTAACCAGAAAGGGACGGCTAACTACGTG

>1812 len=160 tot-seq=8

TGGGGAATCTTCCGCAATGGGCGAAAGCCTGACGGAGCAATGCCGCGTGAACGAAGAAGG  
CCTTCGGGTTGTAAAGTTCTGTCCTAGCCGAAGAGAGAGGAAGGGAGTAACTGCCCTGCC  
TAGGACGGTAGGCTAGGAGGAAGCCCCGGCTAACTACGTG

>1813 len=160 tot-seq=8

TGGGGAATTTTGGACAATGGGCGCAAGCCCGATCCAGCAATGTCGCGTGAGTGAAGAAGG  
CCTTCGGGTTGTAAAGCTCTTTTGTGAGGAAGAACGGTTGGGGCTAATATCCTCGGCT  
AATGACGGTACCTGAAGAATAAGCACCGGCTAACTACGTG

>1814 len=160 tot-seq=8

TGGGGAATTTTGGACAATGGGGGCAACCCTGATCCAGCCATGCCGCGTGACGATGAAGG  
TCTTCGGATTGTAAAGTGCTGTTATAAGGGAAGAACATTTGCAATAGGAAATGATTGCAG

ACTGACGGTACCTTGTTCAGAAAGCGATGGCTAACTATGTG

>1815 len=160 tot-seq=8

TGGGGAATATTGCGCAATGGGCGAAAGCCTGACGCAGCGACGCCGCGTGAGGGATGAAGG

TCTTCGGATCGTAAACCTCTGTTCAGCAGGGAAGAACGGTCACTGTGCTAATCAGCAGTGA

ATTGACGGTACCTGCAAAGGAAGCACCGGCTAACTCCGTG

>1816 len=160 tot-seq=8

TGGGGAATTTTGGACAATGGGCGAAAGCCTGATCCAGCAATGCCGCGTGCAGGATGAAGG

CCCTCGGGTTGTAAACTGCTTTTGTACGGAACGAAAAGCCTGGGGCTAATATCCCCGGGT

CATGACGGTACCGTAAGAATAAGCACCGGCTAACTACGTG

>1817 len=160 tot-seq=8

TGGGGAATCTTGGACAATGGGGGCAACCCTGATCCAGCGATGCCGCGTGTGTGAAGAAGG

CCTTCGGGTGTAAAGCACTTTAGGTGGGGAAGAAAGGCAGTTGTTGAATACGCGACTGT

TATGACGGTACCCGCAGAATAAGCACCGGCTAACTCTGTG

>1818 len=161 tot-seq=8

TGGGGAATATTGCACAATGGGCGCAAGCCTGATGCAGCAACGCCGCGTGAACGATGAAGG

TCTTCGGATCGTAAAGTTCTGTTATACGGGACGAATGGCGTAGCGGTCAATACCCGTTAC

GAGTGACGGTACCGTAAGAGAAAGCCACGGCTAACTACGTG

>1819 len=161 tot-seq=8

TGAGGAATATTGGTCAATGGACGAAAGTCTGACCGAGCAACGCCGCGTGAGTGAAGAAGG

TTTTCGGATCGTAAACTCTGTTGGTAGAGAAGAACGTTGGTGAGAGTGGAAAGCTCATC

AAGTGACGGTAACTACCCAGAAAGGGACGGCTAACTACGTG

>1820 len=161 tot-seq=8

TAGGGAATCTTCCGCAATGGGCGAAAGCCTGACGGAGCAACGCCGCGTGAGTGATGAAGG

TCTTCGGATCGTAAACTCTGTTATTAGGGAGGAACGAGTGTGAGAATGGAAAGTTCATA

CTGTGACGGTACTTAACCAGAAAGGGACGGCTAACTACGTG

>1821 len=161 tot-seq=8

TAGGGAATCTTCCACAATGGACGCAAGTCTGATGGAGCAACGCCGCGTGAATGAAGAAGG

GTTTCGGCTCGTAAAGCTCTGTTGTAAGAGAAGAACGAGTGTGAGAGTGGAAAGTTCACA

CTGTGACGGTATCTTACCAGAAAGGGACGGCTAACTACGTG

>1822 len=161 tot-seq=8

TGGGGAATATTGCACAATGGGCGCAAGCCTGATGCAGCAACGCCGCGTGAACGATGAAGG  
TCTTCGGGTCGTAAAGTTCTGTTGTAAGAGAAGAACGAGTGTGAGAGTGGAAAGTTCACA  
CTGTGACGGTATCTTACCAGAAAGGGACGGCTAACTACGTG

>1823 len=161 tot-seq=8

TGGGGAATCTCCGCAATAGACGAAAGTCTGACGGAGCAACGCCGCGTGAGTGATGAAGG  
TCTTCGGATTGTAAACTCTGTCGTCAGGGACGAATGTACTGATTTACAATACACTTCGG  
TATTGACGGTACCTGACGAGGAAGCCACGGCTAACTACGTG

>1824 len=161 tot-seq=8

TGGGGAATATTGCGCAATGGGGGAAACCCTGACGCAGCGACGCCGCGTGCGGGATGAAGG  
TTTTCGGATCGTAAAGCTCTGTTGTTAGAGAAGAACGTTGGTAGGAGTGGAAAATCTACC  
AAGTGACGGTAACTAACCAGAAAGGGACGGCTAACTACGTG

>1825 len=163 tot-seq=8

GGGTGGACTAGCAAATCTGTGGGCACCAGCAGGAAGAACGCCAATTTGCTGGTCCCTGGA  
CCTTCCACTGCCTATCTCTACTTAGAGCTTTAGAAACCTCTGTTTAGCAGGCCTCAGCAC  
CACAGCAGACTACTCAAGAGACTCAAGGCCTCAACCTCAGACT

>1826 len=164 tot-seq=8

TAGTTCAGAATCAAAAACCTCCCTGGCTCTCCAATCCTTCCAGTATGACACTCTGGTCTC  
CTTCTCTATCCAGTGCACCAGCAGCAGTGGTGGAGAGCCAGAAACCTTCTGGCTCACCA  
AGCCTCCAGCGTGACCCTGTGGCCTCCCGCTCCACCCAGAGCA

>1827 len=173 tot-seq=8

AGGTAGAGGTAGCAGGTGTGTTTCAGGTACGGACGCTCGTTGAAGTGACGCTCGAAGCTC  
CGTGAGAGGAAACTCATGTCGTCCTTCTGAAGCTCCGGCTTGTAGCGTTCCTTGATAAAC  
CAGTCCTGCTTGTGAACGACGGAGTAGTCCGGCAGCACCTTGATTGCCTTGCA

>1828 len=179 tot-seq=8

TCTTCTGGGTCAACTGTACCTTGTTAGAGGTGTGGATAAAGCACTTATGGTCTTTACTC  
TTTCATTAGTTTGAGGGTGGCAAGGGCAGTCTACTACAGAGGCAGTGGCAGAGAGGCTT  
TCAGTTGCCATAGGGTCTCTGTCCAGGAAGTTGCAAAGCTTCCACTGGTTTGATAGCC

>1829 len=183 tot-seq=8

ATGGAGAACTCTGTGGTCAGGGGCCAAGGCCTCCTGGACAACGTCAAAGACGGCAGCTAC  
CGGCTGGCCAATGCAAGATCTACCCTTTGCCGAAAAACGTCCCGTGAAGAAGCTCACGG  
GGACGTCGGTGCCTCAGCCCTCCTGCATGATCAACAGCATGCTGGCTGAGATCTGCCGCC  
AGA

>1830 len=185 tot-seq=8

TAAGATATAATAAGGGAGGAAGCAGTAGGGAATATTACACAATGGACGCAAGTCTGATGG  
AGCAACGCCGCGTGAGTGAAGAAGTTTTTCGGATAGTAAAGATATGTTGTTGGTGAAGAA  
GGATAGAGGTAGTAAATGGAATTTATTTGAAGGTAATCAACCAGAAAGTCACGGCTAACT  
ACGTG

>1831 len=196 tot-seq=8

TCCCAGTGCCATTTGGAGTTCAGTCACAGGAAGAAGTTCGCAATGACAGCACAGCACTGG  
GCACTTGACCAGGTGGGGGACCCTGTATCCCTGAGGTGGCTCAGGGGACAGGACAGAGGC  
ATGACCTTGATCCGGGAATGGGGAGCAGAGCACAGCAGGACAAACCCAAACCCATCTCC  
ATCGTTAAGAAAATCC

>1832 len=203 tot-seq=8

CGAAAGGCCGAAGAACATGGTGGGCAGGAGGATGAGGTATAGTTCCAGGGCCAGAAATATA  
AAGCACTTGTTTTATGTGAAGGTAACTGGGGAGGAGAATCAGAAAGATTACTGCAGTTAC  
CCACCACCCACCCCTTACCCCTCTCGCTCTCTAGCTCTCTCTCTCCTTTCACTCATACC  
AAGAGGAGCCCAACCTAGGTACT

>1833 len=204 tot-seq=8

GAGAAGACGCCAGAGGATAACAAGAGAAGATAGGCTGAGTGCTGCTCACTCACACTCA  
CTCAGGTGGCCGCCAGGCCTCTCAACAAGCCACATGGTCAGTTCGAGCATCTTCTCC  
CAATTGATAGATGACGCAGAGGAGAGGGTTGCTAGGACCTGCCACGTCACACAGCCAGT  
CATTGGCAAAGCTGGAGTTTGAAG

>1834 len=209 tot-seq=8

TCCGATCTCTACGGGAAGCAGCAGGCATAAAATAAACACCCGAACCAATGGCCTTCTGT  
CCTCTAATGGCTTTCTGTCCTCTCTGCCAAGAGAGGTAACATTAGGCACTGGCCTAATC  
ACGACTTCTAATGTGCACAACCTTAGAAGCAGTGGGACCCATTTCTGAGGACTCTCGT  
CTTTCTTTCAATCCTTCTTGATCACC

>1835 len=215 tot-seq=8

ATGTGAACAGCTTTTCCCAGCAGGAAAATTGCCTTCTGAAGGAAATGCACAGATGCAAAC  
TCACAAGGCTCCAAACCCAAAGGCTCTGCAAGGAGAACCCTTGGTCCCCAAGCAGTCCAC  
AATAGACACGCGAGGGTGAGCACACTGTCCCTTTTATGCCAGCCTTCTCCTTAGGAAGT  
GGCAGCAAGGGCGCCCGCAGGAGCTAACCCAGAGA

>1836 len=218 tot-seq=8

GAGTGTAACCTAATCTGGTTGTTACTTTGGTCCTGTGATGAGCAGATGCCAGGGGAAAA  
AGTCAGAATCTCAGAGCTTATGTGTCTTCTGTGGTCTTCTCTGCCTCTCTAGTTTTG  
GGTCGTTACCCATCTGGGCCTTCTCACTAGATCTTCTAGCAGAAGATCTCCTGGTGCAT  
AGATTTAAATGTTCTCTCTCTACACACAGCAACCACCA

>1837 len=221 tot-seq=8

AGATTACAAGGTGAATGGAGTTAAGAAGTGTGATATTAAGAGAGAAGAAGGGAGGAAGAA  
GTAGGGAATATTA AAAAAGGGAAGAAAGGAGGATGGAGAAAAGAAGAGTGAGTGAAGAAG  
GTTTTAGGATAGTAAAGATATGTTGTTGGTGAAGAAGGATAGAGGTAGTAACTGGCCTTT  
ATTTGACGGTAATCAACCAGAAAGTCACGGCTAACTACGTG

>1838 len=223 tot-seq=8

TAGAGCATGAGTGGAAGTGCCTGTGAAACCCAACGCCTGGAATCCGCTCCTGTGATGCC  
CACATCCCTGTTCTGGTTTGCCGACTGTCCAGCGGTGAAAGGTGAGACGTGAGCATCGGG  
GAAGCTGCCTGAGGGCTGCGGGGACTCTGCAAACCTTCTGTAAATCTAAAATTATTCAA  
GAGAAAAAGCCTATTTAAAAA AAAAAAATCACCCACACTGAC

>1839 len=224 tot-seq=8

GGTGCGGGCCAGGGCCAGGGCTGGTGCCCGGGGCCGCTGTGAGGTGGCAGGCGAGGA  
GCGGGAAGACCATCTCTGCAAGTGCAGCATAGCCTCGGCCTAGGACAGCGGGAGTGCCTG  
GCCAAAGCTGTGAGCAGAGGCACAGGTGGTGGCAGACAGTAGAGGCGCCCATGGGGAAC  
ATACTGACCTGTCGTGTGCACCCTAGCGTCAGCCTCGAGTTTGA

>1840 len=230 tot-seq=8

GCTTCCATTTCTGGTGTGTTGTGCTGCATCAGCTTTGCTCCTTTGGGACTGGGTTTCCCAA  
ACGCTCTTCCCGCCTTGTCTGAGTGGTGGGAGCCACACAAGACGTCTGACGTTTGAGGA  
GATTGGGAAGCAGAAGTGTGGCAGCCCCACACACCCAAAGCAAGCAGCTACCACAAACG

CACTCGCCCTCTGGGGTGGGCAGCAGGACGGTCCCCACAGGACCCTCAT

>1841 len=201 tot-seq=8

TGAGGAATATTGGTCAATGGACGAGAGTCTGAACCAGCCAAGTAGCGTGAAGGATGACTG  
CCCTATGGGTTGTAAACTTCTTTTATATGGGAATAAAGTGTTCCACGTGTGGGATTTTGT  
ATGTACCATATGAATAAGGATCGGCTAACTCCGTGCCAGCAGCCGCGGTAATTGGAAGAT  
CGGAAGAGCGTCGTGTAGGGG

>1842 len=135 tot-seq=8

TAGGGAATCTTCCGCAATGGGGGAAACCCTGATGCAGCGACGCCGCGTGAGTGAAGAAGT  
ATTCGGTATGTAAAGCTCTATCAGCAGGGAAGAAAATGACGGTACCTGACTAAGAAGCC  
CCGGCTAACTACGTG

>1843 len=103 tot-seq=7

GGGTGGCAGAGGCAGATGAGGCTGGGTGTCTGGGAGAAAGCTGAGCATGCAGGAGACATC  
CTTCAGCATCAGGATAAAGACTGAATTAGATTCATTTTAGATC

>1844 len=104 tot-seq=7

CCCCCGCCTGTCAGCAGCGAGTCCAGAGGGTGTCCGAGGCCAGAATCCACATGGCCAA  
GGCCCCAGCAGCTCCAGCCGCCACTGCCCTCCCCATTTGTG

>1845 len=107 tot-seq=7

CGGGTGCGGCATCAATTTCCAGTGCTTTCCTGCCATGTGGGCCCATCCGTGCTCATG  
GTACCGCCCTCCAGCGGAGCGATGGCAGCCAGCTGCCCGTGGAGAGC

>1846 len=110 tot-seq=7

CGTTCAGGAAGCGAGACGGAGCACAGTACGTTTTAGAAACGATGAGGCTCATCGTGGCT  
GGCACAGAGAGACACAGGCAGGGCCTGGCCATGCCTAGTCTGTAGCTTTT

>1847 len=112 tot-seq=7

GAGTGAAGAAGTTTTTCGGATCGTAAAGCTCTGTTGTTGGGGAAGAAGGATAGAGGTAGG  
AACTGGCCGTTATGTGACGGTAATCAACCAGAAAGTCACGGCTAACTACGTG

>1848 len=117 tot-seq=7

CACATACAGGCAGGTGTCACACGTAAGGCTGCACAGGAGGCACGGGGTCTGGAGTAACTG  
CTTCTGAGACAGAGCATTCTCTGCACACAGAAAGTCAGCTCTGATGGAGAAAGGTAG

>1849 len=122 tot-seq=7

GTGAGAAGACAAAGGGATGTTTTCTTCATGAGCTAAGCCAGCAGCAACTGTAAGTGCAT  
TTTGTTTCAGCAATTCCCATTCTACAGTTCTATCAGGATATTTATTTGTGAAAGGAACCA  
AG

>1850 len=124 tot-seq=7

GTGGGAGGAGGGGCTGTCCAGTGGGGAGAGGGGATAAAGGGAGGATGGTGCCAAGATGCT  
GTGCTCTTTGATGCTGGGGACCAGGCTGGGTCTCAGCATTGCAACAACCTCCAGCAAC  
ATTC

>1851 len=126 tot-seq=7

CGACTGCAGGAAGACAGTAGGGAGAAGCCTTGAGCAGGGCCACAGGCGGAAGGTCACAGC  
TGCCTTCAGGTGACCAGCAGTTTGCCCGCAGGATAAAAAGTGACTGTAAAGGGGACTGT  
GGAGTC

>1852 len=128 tot-seq=7

TCAGGTGGTCCAGGGGCTGGAGGTGAGGGCTTGCCCGCAGGCGCATGCTGCTCTGTGAGA  
ACTCCGAGGAATAACTCACTGGAGGGCTATAAATGCTGAAGGTAACCAGGCCAAGGACTC  
CAGTGCCC

>1853 len=128 tot-seq=7

TCACAGAGATGGGAGGCAAAGCAGAACTTCAACTGGGAGAGGGTGGCGAGTGGGCTAAG  
TGCTGCAGAGTGGTCTAGGAGGAGCCAGAGGAGTAGCTGCGGAGTCTGGGCGCCTGTGGA  
GGGCAGCT

>1854 len=129 tot-seq=7

ACTCTGTAGGAGGGGCTACAGGGGAAGACCAGCGGCCAGCAGAGCTTATGGACAGGGAAC  
TCCAAGGAGGTAAAGACTGGATATCCAGGAGACATCATCTACGAATGCCAACTGTCCCT  
CCCGTGGGG

>1855 len=129 tot-seq=7

GCCACGTTTTGGAGCTAGTAAGGGTTAGATGCGTCTGAGCCTCAGGATAAATGGAGAGAT  
TAGTAGGAGACAAAGTTGGAATGGCCGCAAGTCCTCAGAATCTTAATAAAACAGTAGTG  
TTCTCGTCC

>1856 len=131 tot-seq=7

GATCCATCCTTGTTACATGTGCTAACAGCAACAGTAGCAGCAGTGCAGGGGGCTGGAGG

GGTGAAAGGTTGCATGCTCACTGGCTGCAGTGCTAGCAGGTAAGGGTGCCTGCCTCTG  
CACAGGCATTC

>1857 len=134 tot-seq=7

TGGGGAATTTTGCACAATGGGGGCAACCCTGATGCAGCGACGCCGCGTGATTTAGAAGGC  
CTTCGAGTTGTAAAATCTTTTGTATAGGAAGAAAATGACAGTACTATACGAATAAGGTC  
CGGCTAATTACGTG

>1858 len=135 tot-seq=7

TGGGGAATTTTGCACAATGGGGGAAACCCTGATGCAGCGACGCCGCGTGAGTGATGAAGG  
AATTCGTTTCGTAAAATCTGTTCTACGGGAAGAAAAGGACTGTACCATAGGAGAAAGCT  
CCGGCTAAATACGTG

>1859 len=135 tot-seq=7

TGGGGGATATTGCACAATGGAGGGAACCTGATGCAGCAATGCCGCGTGAAGGAAGAAGG  
TTTTCGGATTGTAAACTTCTATCAGCAGGGAAGAAAATGACGGTACCTGACTAAGAAGCC  
CCGGCTAACTATGTG

>1860 len=135 tot-seq=7

TGGGGAATTTTGCACAATGGGCGCAAGCCTGATGCAGCGACGCCGCGTGAGGGATGAAGT  
ATTCGGTATGTAAAGCTCTATCAGAAGGGAAGAAAATGACGGTACCTACTAAGAAGCT  
CCGGCTAAATACGTG

>1861 len=135 tot-seq=7

TGGGGAATCTTAGACAATGGGGGCAACCCTGATCTAGCCATGCCGCGTGATCGATGAAGG  
CCTTAGGGTTGTAAAGATCTTCGCTGGGGAAGATAATGACGGTACCCAGTAAAGAAGCC  
CCGGCTAACTCCGTG

>1862 len=135 tot-seq=7

TAGGGAATCTTCGGCAATGGGGGAAACCCTGATGCAGCGACGCCGCGTGAGCGAAGAAGT  
ATTCGGTATGTAAAGCTCTATCAGCAGGGAAGAAAATGACGGTACCTGACTAGGAAGCA  
CCGGCTAAATACGTG

>1863 len=135 tot-seq=7

CAGGGAATTTTGCACAATGGGCGAAAGCCTGACGCAGCAACGCCGCGTGGGGGATGAAGG  
CTCTTGGGTCGTAAACCCTTTTGCCGGGGAAGATCATGACGGTACCCGGCGAATAAGCC



ACGGCTAACTACGTG

>1864 len=135 tot-seq=7

TGGGGAATACTGCACAATGGACGAAAGTCTGATGCAGCAACGCCGCGTGGAGGATGACAC  
ATTCGGTGCGTAAACTCCTTTTATATGAGAAGATAATGACGGTATTATATGAATAAGCA  
CCGGCTAACTCCGTG

>1865 len=136 tot-seq=7

TGGGGAATATTGCACAATGGGGGGAAACCCTGATGCAGCGACGCCGCGTGAGCGATGAAG  
TATTCGGTATGTAAAGCTCTAACAGCAGGGAAGAAGATGACGGTACCTGACTAAGAAGC  
CCCGGCTAACTACGTG

>1866 len=136 tot-seq=7

GCGCGCAAATTACCCACTCCCGGCACGGGGAGGTAGTGACGAAAATAACGATACGGGAC  
TCATCCGAGGCCCCGTAATCGGAATGAGAACATTTTAAATCTCTTAACGATTACCCATTA  
GAGGGCCAGTCTGGTG

>1867 len=136 tot-seq=7

TGGGGAATATTGCACAATGGAGGAAACTCTGACGCAGTGACGCCGCGTATAGGAAGAAGG  
TTTTCGGATTGTAAACTATTGTCATTAGGGAAGATAAAAGACTGTACCTAAGGAGGAAGC  
CCCGGCTAACTATGTG

>1868 len=136 tot-seq=7

TGGGGAATATTGCACAATGGGGAAAACCCTGATGCAGCGACGCCGCGTGAAGGAAGAAGT  
ATCTCGGTATGTAAACTTCTATCAGCAGGGAAGAATTAGGACGGTACCTGACTAAGAAGC  
CCCGGCTAACTACGTG

>1869 len=136 tot-seq=7

GCGCGCAAATTACCCACTGTCAAATCTGTGAGGTAGTAACGAAAATAACAATACAGAAC  
TCTTCGAGGCTCTGTAATTGGAATGAGTACACTTTAAAACGGTCAATAAGGACCGATTG  
GAGGGCAAGTCTGGTG

>1870 len=136 tot-seq=7

TGGGGAATCTTGCGCAATGGGCGAAAGCCTGACGCAGCAACGCCGCGTGCGGGATGAAGG  
CCTTCGGGTTGTAAACCGCTTTCAGCAGGGACGAAAACAGACTGTACCTGCAGAAGAAGC  
CCCGGCTAACTACGTG

>1871 len=136 tot-seq=7

TGAGGGATCTTGACAATGGGCGCAAGCCTGATGCAGCGACGCCGCGTGAGCGAAGAAGG  
CCTTCGGGTCGTAAAGCTCTTTTCTGCGTGACGAGAACGGACGGTAGCGCAGGAAGAAGT  
CTCGGCTAACTACGTG

>1872 len=137 tot-seq=7

TCACACTACTATCACGCGAAGCAGTATCATCGGCAGAAGTATGCTCAACGGAAGCACCTT  
CTGCAGAAACATGCTCACCTACGCGCAAACCAGTCAAATCTGAACCGCTAAAACCAGCTC  
CAAGCAAAGCAGACATG

>1873 len=137 tot-seq=7

TGGGGAATATTGCACAATGGGGGGAACCCTGATGCAGCAACGCCGCGTGAAGGAAGAAGG  
GTTTCGGCTCGTAAACTTCTATCGACAGGGAAGAAAGAAATGACGGTACCTGAATAAGAA  
GCCCCGGCTAACTACGT

>1874 len=137 tot-seq=7

TGGGGAATATTGCACAATGGGGGGAACCCTGATGCAGCGACGCCGCGTGGGCGAGGAAGT  
ATTTCCGGTATGTAAAGCCCTATCGGCAGGGAAGAAGAAATGACGGTACCTGAATAAGAAG  
CACCGGCTAAATACGTG

>1875 len=138 tot-seq=7

TGGGGAATATTGGGCAATGGAGGCAACTCTGACCCAGCAACGCCGCGTGAATGATGAAGG  
TCTTCGGATTGTAAAGTTCTGTGATGGGGGACGAAGAAAGTACGGTACCCCAATAGCAA  
GCTACGGCTAACTACGTG

>1876 len=138 tot-seq=7

TGGGGAATATTGGGCAATGGGCGCAAGCCTGACCCAGCAACGCCGCGTGAAGGAAGAAGG  
CTTTCGGGTTGTAAACTTCTTTTATTCGGGACGAAGAAAGTACGGTATCGAATGAATAA  
GCCACGGCTAACTACGTG

>1877 len=138 tot-seq=7

TTAGGAATATTGGGCAATGGAGGAAACTCTGACCCAGCAACGCCGCGTGAAGGAAGAAGG  
TTTTTCGGATTGTAAACTTCTGATCTTGGGGAAAAAGAAAGTATGGTACCCAAGGAGAAA  
GCCACGGCTAACTACGTG

>1878 len=138 tot-seq=7

TGGGGAATATTGGGCAATGGGCGCAAGCCTGACCCAGCAACGCCGCGTGAGGGAAGAAGG  
TTTTCGGATTGTAAACCTCTGTCTGCAGGGGACGAAGGAAGTGACGGTACCCTGTAAGAAA  
GCCCCGGCTAACTACGTG

>1879 len=138 tot-seq=7

TGGGGAATATTGCACAATGGGGGAAACCCTGATGCAGCAACGCCGCGTGAAGGAAGAAGT  
ATTTCCGGTATGTAACTTCTATCGACAGGGGAGAAACAAATGACGGTACCTGAATAAGAA  
GCACCGGCTAAATACGTG

>1880 len=138 tot-seq=7

TGGGGAATATTGGGCAATGGGGGAAACCCTGACCCAGCAACGCCGCGTGAAGGAAGAAGG  
TTTTCGGATTGTAACTTCTGTCTAAGGGAAGAAAGAAATGACGGTACCTTAGGAGGAA  
GCCCCGGCTAACTACGTG

>1881 len=138 tot-seq=7

TGAGGAATATTGGTCAATGGGGGGAACCCTGATCCAGCGACGCCGCGTAAGTGAAGAAGT  
ATTTCCGGTATGTAAAGCTCTATCAGCAGGGAAGAAAGAAATGACGGTACCTGACTAAGAA  
GCCCCGGCTAACTACGTG

>1882 len=138 tot-seq=7

TGGGGAATATTGGGCAATGGAGGCAACTCTGACCCAGCAACGCCGCGTGAATGAAGAAGG  
CCTTCGGGTTGTAAAGTTCTTTAATTGGGGACGAAGGAAATGACGGTACCCAAAGAATAA  
GCCACGGCTAACTACGTG

>1883 len=138 tot-seq=7

TGGGGAATATTGCACAATGGGCGAAAGCCTGATGCAGCAACGCCGCGTGAGCGATGAAGG  
CCTTTGGGTCGTAAAGCTCTGTCTGGAAGGGAAGAAACAAATGACGGTACCTCCGAGGAA  
GCCCCGGCTAACTACGTG

>1884 len=139 tot-seq=7

TGTATGTAACACAGTTTGAAAACATTCCACTACTATCCATTATTAATTGTGACATCACCA  
GTAGTCCCTTTCCGGGACAATCTCTTGTATTCCGGGAGAATCCTAGAATCACCTGTGATGT  
CACCAAGTGTGTGGTGACA

>1885 len=140 tot-seq=7

TGGGGAATATTGCACAATGGGCGCAGGCCTGATGCAGCGACGCCGCGTGAGGGATGACGG

CCTTCGGGTTGTAAACCTCTTTTGTAGGGAGCAAGCGTAAGTGAGTGTACCTTTTGAAT  
AAGCACCGGCTAACTACGTG

>1886 len=141 tot-seq=7

TCCTACGGAGGCAGCAGGTTCCACTACGAGGGTCATTTTAATTTCAAATATATTGTA  
ACTTACGTCCTTTTTTCTTCTATTAAGAATAAAAGGTGTTATAACAAACAGTACCATTGCTAAG  
GCAGGGTGAGTAAGCCCGATT

>1887 len=142 tot-seq=7

TGGGGAATATTGCACAATGGGCGCAAGCCTGATGCAGCAACGCCGCGTGAACGATGAAGG  
TCTTCGGATTGTAAACCGCTTTTCAGCAGGGACGAGGCCGCAAGGTGACGGTACCTGCAGA  
AGAAGCCCCGGCTAACTACGTG

>1888 len=142 tot-seq=7

TGGGGAATATTGCACAATGGGCGAAAGCCTGATGCAGCGACGCCGCGTGAGGGATGACGG  
CCTTCGGGTTGTAAACCTCTTTTCAGCTCTGACGAAGCCTTCGGGTGACGGTAGGAGCAGA  
AGAAGCACCGGCTAACTACGTG

>1889 len=143 tot-seq=7

TGGGGAATTTTTGGCAATGGGCGAAAGCCTGACCAAGCAACGCCGCGTGGATGATGAAGT  
ATCTCGGTACGTAAATCCTTTTCGACGGGGACGAAGCCGCAAGGTTGACGGTACCCGTAG  
AAGAAGCCCCGGCTAACTCCGTG

>1890 len=147 tot-seq=7

GTGGGACCTGCCGGAGACCAGGATGGGAGATACCTGGGAGACGCCAGGAAATGCCCCGGG  
GCAGTCAGGAGGGCTCCTGCGCACCTGGTGGCCCCAGGTCACACATGGAACATCATGAGG  
AAGTCCCCGCCAGGTACCCGACCTC

>1891 len=152 tot-seq=7

GGAAGGGAGGGTCCAGGGAGGCTGCTGGAAAGACTACGATTCTGGGGGCTGGAACCTGAGC  
TCTGAGGAGCAACAGGAGGGTCCCCAAAGATTCCACTGGGAATTGTTTCAGATCTCCACCT  
TCCTGGGATGGAGAACATCCACTCACCCAGAA

>1892 len=154 tot-seq=7

TATTAATTTTTTCATGACAGGCCTCTGCTACCATGCACTGTAATAGACAAAGGAATTTTTGG  
ACCCAGAGCCTCTGGAGAACAGGAAATAGATGAGACATTTTGATTGAAGAGTAAATGGCC

CACTAAAATAGCAGTTAATCCTTTTATTATCTTT

>1893 len=154 tot-seq=7

TGGGGAATATTGGACAATGGAGGGAAGCTCTGATCCAGCAATTCTGTGTGTGTGAAGAAGG  
TTTTAGGACTGTAACTGCTTTTATATGGGAATAAAGTGAGGGACGTGTCCCTTATTGCA  
TGTACCATACGAATAAGGACCGGCTAATTCCGTG

>1894 len=155 tot-seq=7

TGAGGAATATTGGTCAATGGGCGGAAGCCTGAACCAGCCAAGTAGCGTGCAGGATGACGG  
CCCTATGGGTTGTAACTGCTTTTGCAGGGGGATAAAGTGAGTCACGTGTGACTTATTGC  
AGGTACCCTGCGAATAAGGACCGGCTAATTCCGTG

>1895 len=155 tot-seq=7

TAAGGAATATTGGTCAATGGGGGCAACCCTGAACCAGCCATGCCGCGTGCAGGATGACTG  
CCCTATGGGTTGTAACTGCTTTTGTGCGGGGAATAAACCCACTACGTGTAGTGGGCTGA  
ATGTACCCGAAGAATAAGGATCGGCTAACTCCGTG

>1896 len=155 tot-seq=7

TGAGGAATATTGGTCAATGGGCGGAGCCTGAACCAGCCAAGTCGCGTGAGGGAAGACGG  
TCCTATGGATTGTAAACCTCTTTTGTGCGGAGAGCAAAAGATCCCACGTGTGGGATTTCGA  
GAGTATCCGAAGAAAAAGCATCGGCTAACTCCGTG

>1897 len=155 tot-seq=7

TGAGGAATATTGGTCAATGGACGAGAGTCTGAACCAGCCAAGTAGCGTGCAGGATGACGG  
CCCTATGGGTTGTAACTTCTTTTATAAAGGAATAAAGTCGGGTATGCATACCCGTTTGC  
ATGTACTTTATGAATAAGGATCGGCTAACTCCGTG

>1898 len=155 tot-seq=7

TGAGGAATATTGGTCAATGGGCGAGAGCCTGAACCAGCCAAGTCGCGTGAGGGAAGACGG  
CCCTACGGGTTGTAAACCTCTTTTGTGAGGGAGCAAGAACGGATACGTGTATCCGAGCGA  
GAGTACCTGAAGAAAAAGCATCGGCTAACTCCGTG

>1899 len=155 tot-seq=7

TGAGGAATATTGGTCAATGGGCGGAAGCCTGAACCAGCCAAGTAGCGTGCAGGATGACGG  
CCCTATGGGTTGTAACTGCTTTTATACAGGAATAAAGTTAGCCACGTGTGGTTATTTGT  
AGGTACTGTATGAATAAGGACCGGCTAATTCCGTG

>1900 len=155 tot-seq=7

TGAGGAATATTGGACAATGGGTGAGAGCCTGATCCAGCCATCCC GCGTGCAGGAAGACGG  
CCCTATGGGTTGTAAACTGCTTTTGTACGAGAATAAACCACTTTCGTGAAGGGTGTGA  
AGGTACCGTACGAATAAGCACCGGCTAACTCCGTG

>1901 len=156 tot-seq=7

TGAGGAATATTGGTCAATGGGCGCGAGCCTGAACCAGCCAAGTCGCGTGAGGGAAGACGG  
CCCTACGGGTTGTAAACCTCTTTTGTGAGGGAGCAACGGCCGCCACGTGTGGCGGAAAAG  
AGAGTACCTGAAGAAAAGCATCGGCTAACTCCGTG

>1902 len=156 tot-seq=7

TGAGGAATATTGGTCAATGGGCGAGAGCCTGAACCAGCCAAGTAGCGTGAAGGATGACGG  
CCCTACGGGTTGTAAACTTCTTTTGTGCGGGAATAAAGGAGCCTACGTGTAGGCTTTTGC  
ATGTACCGTAACGAATAAGCATCGGCTAACTCCGTA

>1903 len=158 tot-seq=7

TGGGGAATATTGCACAATGGGCGCAAGCCTGATGCAGCGACGCCGCGTGAGGGATGGAGG  
CCTTCGGGTTGTGAACCTCTTTCGCCAGTGAAGAAGGTCCTGCTCTTTGTGGTGGGGTTG  
ACGGTAGCTGGGTTAATGAAGCGCCGGCTAACTACGTG

>1904 len=159 tot-seq=7

GAACAGATCGGAAGAGCGTCGTGTTGGGGGATATTGCACAATGGGGGGAACCCTGATGCA  
GCGACGCCGCGTGAGGGAAGAAGGTTTTCGGATTGTAAACCTCTGTCTTTGGTGACGAGA  
GTGACGGTAGCCAAGGAGGAAGCCACGGCTAACTACGTG

>1905 len=160 tot-seq=7

TGGGGAATATTGCGCAATGGGCGAAAGCCTGACGCAGCGACGCCGCGTGAGGGATGAAGG  
TCTTCGGATCGTAAACCTCTGTGAGAAGGGAAGAACTAGGGTGCTCTAATCATCATCCT  
ACTGACGGTACCTTCAAAGGAAGCACCGGCTAACTCCGTG

>1906 len=160 tot-seq=7

TAGGGAATCTTCGGCAATGGACGAAAGTCTGACCGAGCAACGCCGCGTGAGCGAAGAAGG  
CCTTCGGGTCGTAAAGCTCTGTTGTTAGAGAAGAACATGGGTGAGAGTAACTGTTACCC  
CTTGACGGTATCTAACAGAAAGCCACGGCTAACTACGTG

>1907 len=160 tot-seq=7

TAGGGAATCTCCGCAATGGACGAAAGTCTGACGGAGCAACGCCGCGTGAGTGAAGAAGG  
TTTTCGGATCGTAAAGCTCTGTTGTTAAGGAAGAACACCATGGATAGGAAATGATCGATG  
GATGACGGTACTTAACCAGAAAGCCACGGCTAACTACGTG

>1908 len=160 tot-seq=7

TGGGGAATATTGGACAATGGAGGGAAGTCTGATCCAGCAATTCTGTGTGTGTGAAGAAGG  
ATTTTCGGTTCGTAAAAGTCTGTTGTTAGGGAAGAAAAATGTGTAGTAACTATATACAAA  
AGAGACGGTACCTAACCAGAAAGCCACGGCTAACTACGTG

>1909 len=160 tot-seq=7

TGAGGAATATTGGTCAATGGGCGCTAGCCTGAACCAGCCAAGTAGCGTGAAGGATGAAGG  
TCTTCGGATTGTAAAGTACTTTTCAGCGGGGAGGAAGGGAGTAAAGTTAATACCTTTGCTC  
ATTGACGTTACCCGCAGAAGAAGCACCGGCTAACTCCGTG

>1910 len=160 tot-seq=7

TAGGGAATTTTCGGCAATGGGGGGAACCCTGACCGAGCAACGCCGCGTGAGGGAGGAAGT  
ATTTTCGGTATGTAAACCTCTGTTATAAAGGAAGAACGATGCATGTAGGGAATGACATGCA  
AGTGACGGTACTTTATGAGGAAGCCACGGCTAACTACGTG

>1911 len=160 tot-seq=7

TGGGGAATATTGGGCAATGGGCGCAAGCCTGACCCAGCAACGCCGCGTGAGTGATGAAGG  
TCTTCGGATCGTAAAAGTCTGTTATTAGGGAAGAACAATGTGTAAGTAACTATGCACGT  
CTTGACGGTACCTAATCAGAAAGCCACGGCTAACTACGTG

>1912 len=160 tot-seq=7

TGGGGAATCTTGGACAATGGGCGCAAGCCTGATCCAGCAATGCCGCGTGGGTGAAGAAGG  
CCTTCGGGTTGTAAAGCCCTTTTCGGCGGGGAAGAAATCGGTCAGGCGAATAGTCTGGCTG  
GATGACGGTACCCGCAGAAGAAGCACCGGCTAACTACGTG

>1913 len=160 tot-seq=7

TGGGGAATATTGCACAATGGGGGGAGCCCTGATGCAGCCATGCCGCGTGAATGAAGAAGG  
CCTTCGGGTTGTAAAGTCTTTTCGGTATTGAGGAAGGTTGATGTGTTAGTAGCACATCAA  
ATTGACGTTAAATACAGAAGAAGCACCGGCTAACTCCGTG

>1914 len=160 tot-seq=7

TGGGGAATATTGCACAATGGGCGCAAGCCTGATGCAGCCATGCCGCGTGTATGAAGAAGG

CCTTAGGGTTGTAAAGTACTTCCAGCGGGGAGGAAGGTGATAAGGTTAATACCCTTATCA  
ATTGACGTTACCCGCAGAAGAAGCACCGGCTAACTCCGTG

>1915 len=160 tot-seq=7

TGGGGAATATTGCACAATGGGCGCAAGCCTGACGGAGCAACGCCGCGTGAGTGATGAAGG  
TCTTCGGATCGTAAACTCTGTTATTAGGGAAGAACATATGTGTAAGTAACTGTGCACAT  
CTTGACGGTACCTAATCAGAAAGCCACGGCTAACTACGTG

>1916 len=160 tot-seq=7

TAGGGAATCTTCCACAATGGGCGAAAGCCTGATGGAGCAACGCCGCGTGTGTGATGAAGG  
CTTTCGGGTCGTAAAGCACTGTTGTATGGGAAGAAATGCTAGGTTAGGGAATGAGCTTAG  
TTTGACGGTACCATAACCAGAAAGGGACGGCTAAATACGTG

>1917 len=160 tot-seq=7

TAGGGAATCTTCCACAATGGACGAAAGTCTGATGGAGCAACGCCGCGTGAGTGAAGAAGG  
ATTTTCGGTTCGTAAACTCTGTTGCAAGGGAAGAACAAGTAGCGTAGTAACTGGCGCTAC  
CTTGACGGTACCTTGTAGAAAGCCACGGCTAACTACGTG

>1918 len=160 tot-seq=7

AATCGCTTGAACCCAGGAGGCGGAGGTTGCAGTGAGCTGAGATTGTACCACTGCATTCCA  
GCCTGGGCGACAGAGTGAGACTGTCTCACAAAAAGACAAAAAGAAAGTCACCCTCTTAGG  
TTGGTGGACATTAAACAAGACCTCCTTTCTCCATGGGTGG

>1919 len=160 tot-seq=7

TGGGGAATATTGGACAATGGGCGCAGGCCTGATCCAGCCATACCGCGTGGGTGAAGAAGG  
CCTTCGGGTTGTAAAGCCCTTTTGTGGGAAAGAAATCCAGCTGGTTAATACCCGTTGG  
GATGACGGTACCCAAGGAATAAGCACCGGCTAACTTCGTG

>1920 len=160 tot-seq=7

TAGGGAATTTTCGGCAATGGGCGAAAGCCTGACCGAGCAATGCCGCGTGAGTGAAGAAGG  
CCTTCGGGTTGTAAAGCTCTGTTGTAAAGGAAGAACGGATGGCATAGGGAATGATGCCAT  
TGTGACGGTACTTTACGAGGAAGTCACGGCTAACTACGTG

>1921 len=161 tot-seq=7

TAGGGAATTTTCGTCAATGGGGGGAACCCTGAACGAGCAATGCCGCGTGAGTGAAGAAGG  
TTTTTCGGATCGTAAAGCTCTGTTGTTAGAGAAGAACGTTGGTAGGAGTGGAAAATCTACC



AAGTGACGGTAACTAACCAGAAAGGGACGGCTAACTACGTG

>1922 len=161 tot-seq=7

TGGGGAATATTGGACAATGGGCGAAAGCCTGATCCAGCCATGCCGCGTGTGTGAAGAAGG  
TTTTCGGATCGTAAAGCTCTGTTGTTAAGGAAGAACGAGTGTGAGAATGGAAAGTTCATG  
CTGTGACGGTACTTAACCAGAAAGGGACGGCTAACTACGTG

>1923 len=161 tot-seq=7

TAGGGAATATTGCGCAATGGAGGAACTCTGACGCAGCGACGCCGCGTGGGTGACGAAGG  
TCTTCGGATCGTAAAGCCCTGTCGGAAGGGGAAGAAAACGTTATGGCTAACATCCATGAC  
GCTTGACGGTACCTTTAAAGGAAGCACCGGCTAACTTCGTG

>1924 len=161 tot-seq=7

TTAGGAATATTCGTCAATGGGGGAAACCCTGAACGAGCAATGCCGCGTGAAGGAAGAAGG  
TCCTCTGGATTGTAACTTCTGTTGTAAGGGAAAAACGACTAAATTAGGAAATGAGTTTA  
GAGTGATGGTACCTTACGAGAAAGCTCCGGCTAACTACGTG

>1925 len=161 tot-seq=7

CTAAGAATCTTCCGCAATGGACGAAAGTCTGACGGAGCGACGCCGTGTGAATGAAGAAGG  
CCGAAAGGTTGTAAAATTCTTTTGCAGATGAGGAATAAGGGGAAGAGGGAATGCTTCTCT  
GATGACGGTAGTCATGCGAATAAGCCCCGGCTAATTACGTG

>1926 len=161 tot-seq=7

TGGGGAATATTGCACAATGGGCGAAAGTCTGACGGAGCAACGCCGCGTGAGTGATGACGG  
CCTTCGGGTTGTAAAGCTCTGTTAATCGGGACGAATGGTCTTTGTGTGAATAATGCAAAG  
ATTTGACGGTACCGGAATAGAAAGCCACGGCTAACTACGTG

>1927 len=161 tot-seq=7

TGGGGAATATTGCACAATGGGCGCAAGCCTGATGCAGCGACGCCGCGTGAGTGATGACGG  
CCTTCGGGTTGTAAAGCTCTGTTAATCGGGACGAATGGTCTTTGTGTAAATAATGCAAAG  
ATTTGACGGTACCGGAATAGAAAGCCACGGCTAACTACGTG

>1928 len=161 tot-seq=7

TAGGGAATCTTCGGCAATGGGGGAAACCCTGACCGAGCAACGCCGCGTGAGTGATGACGG  
TCTTCGGATTGTAAAGCTCTGTTAATCGGGACGAATGGTTTGTGTGCAAATAGTGCATAG  
ACATGACGGTACCGGAATAGAAAGCCACGGCTAACTACGTG

>1929 len=161 tot-seq=7

CATGGGGAAAGGACGCGCGGGCCGAGTTGGCACCACAGGTAAACAGGCTGGCGAGGCGCA  
GGACGCTGTCGCCGCCGCGGCCACCCAGCGATTTCCGGGCACGCAACTCCGCCTCCAGGG  
CTCTCTCCCTCGCGCTCTCTCCAGCCGCTTGCTCGCAGCC

>1930 len=161 tot-seq=7

TGGGGAATTGTCGCAATGGGCGCAAGCCTGACGACGCAACGCCGCGTGGAGGATGAAGA  
CCTTCGGGTCGTAAACTCCTTCGACCGAGATGAATTCTCGCCGACCTAACACGTCGGCG  
GGGTGACAGTATCGAGGGAAGCAGCCCCGGCTAACTCCGTG

>1931 len=161 tot-seq=7

TGGGGAATATTGCACAATGGGCGAAAGCCTGATGCAGCAACGCCGCGTGAGCGATGAAGG  
CCTTCGGGTCGTAAAGCTCTGTCTTCAGGGAAGAACCGGCATAATGTAAACAATGTTATG  
TCCTGACGGTACCTGAGGAGGAAGCTCCGGCTAACTACGTG

>1932 len=161 tot-seq=7

TGGGGAATATTGGACAATGGGCGAAAGCCTGATCCAGCCATGCCGCGTGTGTGAAGAAGG  
CCTTCGGATCGTAAAGCTCTGTTGTAAGAGAAGAACGTGTGTGAGAGTGGAAGTTCACA  
CAGTGACGGTAACTTACCAGAAAGGGACGGCTAACTACGTG

>1933 len=162 tot-seq=7

TGAGGAATATTGGTCAATGGACGGAAGTCTGAACCAGCCAAGTAGCGTGCAGGATGACGG  
CCCTATGGGTTGTAAAGCTCTGTTAATCGGGACGAATGGTCGGTGTGCAAATAGTGCCTG  
GACATGACGGTACCGGGATAGAAAGCCACGGCTAACTACGTG

>1934 len=164 tot-seq=7

AGCCAGCGTTCTGCATGGGGGTTTTAATGTAGTGCCAGGCAATAATGTGAGATCCATTCT  
CGTTCTGGATTAGAGGTTGGCCTTGAAAGCCTCCAAGGGTTCAGGACTCCCTGTTGACT  
CTTCTTTACGTTTCTAGCTGTCTGCCAGTCAGCCCAGTATTC

>1935 len=165 tot-seq=7

AACTAAGGTACACCCCTAGGATTGCACCATAAAATAAGGAGACAACTGAGAGGTGAGATG  
CACAGGTGAAAATGCCTTGTACTTCCCCTGAGCTGATGAGATTGCATGTATGGAAGAAA  
TTATCTTAGAGTAAGAGTAAAGCATCCCAGTCAGGGGACCTCCAC

>1936 len=166 tot-seq=7

TGAGCGTTGATCACACAACGTATTCCAGCCTGGGTAGCAAAGTGAGATCCCTGTCTCAC  
AAAAAAGAAGAAATTCGGACACAGACACACACAGGGAGTCTGTCACATGAAGACGAAG  
GCAGAGATCAGAGTGATGCTTCTACAAGCCAAGGACTACCAAGATG

>1937 len=166 tot-seq=7

TGGGGAAGTGCTCAAGGCCAAAGGCTCTGCGGCCAACTGGGCCCAACGGCCAAGAGCCA  
TGGGGGATGGGGAAGTGCTCAAGGCCAAAGGCTCAAAGGCCAACACGCCAGGCCACAAT  
GCAGTGCCTGGGGGCTACAGTGCCACGGCCACCTCACAAAGGCCCT

>1938 len=169 tot-seq=7

TTTGAGTAAACTTTTGTACCATGACTGTTATGTAAAGAGATTCAATTATGGTGCGCAGT  
GTTTTGTGAGTAACTACCGCCATAAAAAGTTAATTAATCAGGGCTGTGTCAATTCCTG  
GTGCCGTGTCAATTTGCTGCAAGGTAATTAATCACTAATCACCCACCAG

>1939 len=169 tot-seq=7

CTCTGTGGAATCAGGGAACAGTAGCAACAGCTTCAGTTCCCAACAGGTGCACAACATTT  
CACAGGCCACACAGCTCTGTGGACAGGAGCGTTCTAGGAAGGACAGGCAGAGCATCCCAG  
CCTGCCCCAGAAGAACACAGGCCAGATGCCTCAGGATATTCCTTTGGGC

>1940 len=170 tot-seq=7

GTTTCATGGTGCTCTCTGGAATCTTCTCAAGGGAGGAGCCTGAAAGCTCTTTACAGATCA  
TTGCCTGGCTTTCCCACTTCTCAGCTCTGTTGTCTGATGACCAACAGCTATGGCCATCAA  
GATGGCTCAGGAGAAAGGCACTTGCTGCCAAGCATCTGTCCTCCAACCT

>1941 len=170 tot-seq=7

TCCATGGGCCAGATATAGTCCTGGAGCGGCCAGTTTGAACCAGAGAGTGTGTGTATGTT  
AGAGGGGTGGAGTCAGGGAAGGGAGAGAATGCCAAGGTCACTGAGATTTCAAGCCCAGG  
CCACCAGGAAAGTGATATGTCCTTGCACTGGAATAGGGAAGTCGGGAGGA

>1942 len=171 tot-seq=7

CTTGCAAGCTGCCATAGTACTGAACAGATAAACCTCAAACACCTGCCATACCCACAAC  
CCCTCCTAAGTGGTCTTCTGGATAATTGTCATGCTGGTCCCATGTGACCTCCACCTAAG  
CCTCAGCTGCGTGGACTGGAGCTCATCCCATGACCCAAGTGCAGCCAACCT

>1943 len=173 tot-seq=7

AACTTAGGAAATTAGTCTGAACAGGTTAGAGGGTACACCAGAGAACCGGACAGCTTCTGG

GACGGGCAGAAGCACAGACCCGCTGAGGCAGCACCCCTTGGTGGGCCGCAGACAGCCGGCC  
ACCGTCCGGACCAGAGGACAGGTGTCCGCCTGGCTTGGGAGGCGGCCTCAGTC

>1944 len=173 tot-seq=7

GAAGACTTTTGAGCTGAGCCTTAAGGGGTGGTCAAGAGTTTGTGACGGAGATTCAGGGG  
TTGGTGTGAGAGAGAGCATCCTCCTTCTCATGGGCAGGCAGGAAAGAGAGGCCTTTGT  
CCCTTCCGTGAGGGTTGCCTCCAGTCCCCGAGTCGGCCCCGCACAGAGCCCA

>1945 len=173 tot-seq=7

CACTGAGAAGACAAAGCTAGCAGGATGGTTGGGAGATAGATTATGACCACACAGTCCCAC  
AGACACCAAGCCTGAGGCTGCCAGGGCTGTATGTGGAGGTGGAGGTGGCTTCCAGCCAG  
GACACCTGAGAGGAGTCTGAAGAGCACCCAGAACATGTGGTGGTAATGGCAGC

>1946 len=175 tot-seq=7

GGTTGGATCTTACAGAGTCTTGGGTTTCACTTGGAGGGAGATGAGAAACCATTATAGAAA  
TATGAGTAATGGGATGAGTGACACAAGTGGACTTGTGTTCTGAACAGCTGTCCTAGCTGA  
CATGTGACAACCTAGACCATAAGGAAGGCGAGGCTTTAGAAGACTGTTGCAATAAT

>1947 len=176 tot-seq=7

CACCATGTCCTCGTTTGAGGGGTAGTCTGGCAACCTGACCACCCTTACTCTATCTACAGA  
AATTCCAAGAGCAAGTCAAACATGTGCTCTCTGCCTGCGATGGGCACTATGCTACTTCTC  
TTTCTCTTGCTGGAAGAAGTCAAACCCTACTCTCCAACCCATGCAGCCCTCCACC

>1948 len=176 tot-seq=7

TGGGAATTTTGCGCAATGGGGGAAACCCTGACGCAGCAACGCCTCGTGAGTGATGGAGG  
CTTTCGGGTCGTAAAGCTCTGTCAGAGGGGAAGAAATGAGACTGGCTAATATCCGGTTTT  
CTTGACGGTACCCTCAAAGGAAGCACCGGCTAACTCCGTCCCAGCAGCTGGGGAAT

>1949 len=177 tot-seq=7

TAGAAAAGCTCTGTTATGTGGGAGCAAACGGCAGCAGAAATGGGCATTTTCCAAGTCCC  
TGAGGGCAGGGCCTAACGTCCAAGCCTGCTTTGTTTGGTGATAAGATTTGGCTTTGTTCT  
TTTCCCAGCCCCAAGGATACATGCTGCGGGGAGTCCTGATCTGAGTTCTCCGTTGA

>1950 len=178 tot-seq=7

GTAGCTGAGCAGGGGCCGGAGCCAGCGGAGGATGGCGGGCACCTGGCATCGGAGCCTGAG  
GTGCAGCCAAGTGACAGGTCCCCCTAGAGCACTCCTCACCTGAGAAGGAGGCCCAAGC

CCAGAGAAGACTCTCCCACCCAGAAAACCGTGGCGGCTGAAAGTCACGAGAAAGTCC

>1951 len=179 tot-seq=7

TGAGGTGCTGGCTAAGAGGGCGTGTGGTGGGAGTTGGACCCTCTCGCATGGCTGCAGTGT  
GCAGAACGTGCTGGGAGACCCAGGACTACAGACGGTGGCTCCTGTGCCCTGAGAAGGAC  
CCGGCTTCTTCACGAGGAGATGCCAAGGCTCTGCAGGGTAACCCAGAGCCCTTGGTCT

>1952 len=181 tot-seq=7

CACTATCAGGGGACGAGAAAAGCAGACTGACAGACAGGCCCTTTCCCGGCTCACATGCAG  
GCAGCACAGAACATCGTGGGGCTCCGCTAGGGAGAGAAACAGCCTCGGTTTACCTTAAAT  
GTCATCTTTGTTTCTTCTAAGTCTCAAACATCCTGCCCTTCCCCACTGCTTACCCCGC

C

>1953 len=183 tot-seq=7

TGGGGAATATTGCACAATGGGGGAAACCCTGATGCAGCGACGCCGCGTGGAGGAAGAAGG  
TCCTCGGATTGTAAACTCCTGTTGTTGAGGAAGATAATGACGGTACTCAACAAGGAAGTG  
ACGGCTAACTACGTGCCAGCAGGCGGTAATAGGCAGATCGGAAGAGCGTCGTGTTGGGGA  
ATA

>1954 len=184 tot-seq=7

TGGGGAATATTGCACAATGGGGGAAACCCTGATGCAGCGACGCCGCGTGGAGGAAGAAGG  
TCTTCGGATTGTAAACTCCTGTTGTTGAGGAAGATAATGACGGTACGCAACAAGGAAGTG  
ACGGCTAACTACGTGCCAGCAGGCGGTAATCATCAGATCGGAAGAGCGTCGTGTAGGGA  
AAGA

>1955 len=190 tot-seq=7

TAGGGAATCTTCCACAATGGGCGAAAGCCTGATGGAGCAACGCCGCGTGGGTGAAGAAGG  
TCTTCGGATCGTAAAACCCTGTTGTTAGAGAAGAAAGTGCCTGAGAGTGGAAGTTCACA  
CAGTGACGGTAACTTACCAGAAAGGGACGGCTAACTACGTGCCAGCAGCCGCGGTATGAG  
CAGATAGGGA

>1956 len=192 tot-seq=7

TCCAATTTCCCTTGGTAACCAGGACTGATTACCCCATCCTACACAGTAGCTCCCTTCCT  
TGCCTGTTAATTAAGAGGCAGGAGGAGCCCAAGGTGACTAGTTAAGATGATCGTCTTAAC  
TTCTGTTTCAGTGAAATTATTGTTGTGTTTCTAGTAAAAATTTTCTCCATTGGAGCT

AATACATCTATA

>1957 len=193 tot-seq=7

AGGGGTGGAGGCACAGGGTAGGGGGCAGGGCCAGGCTGGGACCGCCCTTGGTGGCCTCGG  
GTGGAAGCCTGGGCTCCCCACCACCTAGATCCTTGCAGGCAACGGCTGCCACCAGCTGGG  
TCCGAAAGGCACCTCAGCAGCTTGGGATCACCTAGAATGGCCCCATTTCAAATATTCTGT  
TCCATGCCCAGCC

>1958 len=198 tot-seq=7

CTCAAACCTCTCTTGACGGATGGGAACTGATGCTCCGACGACAGGGTAGAGACTCCTCAG  
CGTCAACCCGCTTTCGCGGCAGGACAGAACTGGGCCTGGGCCTGAGATGGTTCCTTCC  
TACACCCTTCTCCAGGGTACCGTGTCCACCTCTAAGCCTCTGGACCCTCTGACATGTAAC  
CTGTGTCCCCTCCCCAAG

>1959 len=204 tot-seq=7

GGCAGCTCCTAAATGGCTGAGTGACCCTCTGCTCACACTGTCATCCGATCCCTCCGGGTC  
AGAGTCAGACTGTGGGATGAGGGACAAGGGAGCTGACCTCCTGCCATTTTGCTTCTGCT  
GTTCTTGTAATAATAAACTGTCTAAATCCACGTGGGCTCATTGTCTCATCCCTGGCTGG  
ATGCATGGAAGTGCGCCAAATCCA

>1960 len=206 tot-seq=7

GACACAGAGCCCTATCGGGTCAGCTTGTGAGGAACCTTCCCCAGGGTGTCCAGTCACG  
GCTATGCCAGCACCACTCCCAAAATCAGAAAGAAAAGCCTCTGCTGAAGCAGAGAGTGT  
ATCTCAGTTTCCAGTGCAGCTGTACTGTTCCGGCAGCCTCAGGCAAGCCACTGCAGCTGGC  
TGCTCCAGGCCATGTTACTCTCCCCA

>1961 len=208 tot-seq=7

TTCCCTTCTATGGCAGGGCTGCTCCCACCAGCCAGTGAAGGTCAGTGTGTCCAGAGTCAC  
TGTCTGGGCAGGGCTCTGGGACCTCCTGCCGCATATTCTTGGCTGATGGTGCTGATTTG  
GCCCCAAATCTCTTTAGAGACCACCCAAGGCCTGCCACAGCACAGTCTATTTTTTCATAA  
GGGAGCTTGAGCACGGGGGCAGTTGGGG

>1962 len=210 tot-seq=7

TAGGGAATCTTCCACAATGGGCGCAAGCCTGACCGAGCAACGCCGCGTGAGTGAAGAAGG  
TTTTCGGATCGTAAACTCTGTTGTTAGAGAAGAACAAGGATGAGAGTAACTGTTTCATCC

CTTGACGGTATCTAACCAGAAAGCCACGGCTAACTACGTGCCAGCAGCGCGGTAATTACA  
AGATCGGAAGAGCGTCGTGTAGGGAAAAAG

>1963 len=210 tot-seq=7

GGCCACTGGAGTGGAATGGAGACCTGGGGGCTGTGGGAGCTGTCCAGGCGTGGACGGTG  
GTGTGGGGCTGGGTGTGGGGTGCTGCTTCTGTTGACAGAATCCCCACGCTCTGCTCTTCC  
CCCAGTTCTGGCTGACCATGTTCTACTTGTCTGAAGATGACAGAGGAGCAGACTTTGGTCA  
TGTACAGTGGGCACCCACTTGGCCTCTTTC

>1964 len=217 tot-seq=7

TCTCTGTGACTGGAGTTCAGACGTGTGCCCTTCCGATCTCCTATGGGAGGCAGCAGTGGG  
GAATTTTCCGCAATGGGCGAAAGCCTGACGGAGCAATACCGCGTGAGTGAAGAAGGTTTT  
CGGATCGTAAAGCTCTTTTGTAGGGACGAATGTAGCTTTTGTAAATAATGAGAGCTAAT  
GACGGTACCTAAAGAAAAAGCCACGGCTAACTACGTG

>1965 len=221 tot-seq=7

CAAGCAGAAGACGGCATAACGAGATCTAAGAGTGAATGGATGAAGAAGTGTGAGATTAAGA  
TATAATAAGGGAGGAAGAAGTGGGGAATATTGAGAAATGGGGAAAAAATGAAGAAGAGAA  
GAAGAGTGAGGGATGAAGGCCTTCGGGTTGTAAACCGCTTTTGATTGGGAGCAAGCCTTC  
GGGTGAGTGTACCTTTCGAATAAGCGCCGGCTAACTACGTG

>1966 len=229 tot-seq=7

GGCCCTGATGGAGACTGTGCACAATAAATGTTCAATAAGTACTTGTGAATATTGAAAAAA  
TGCACAGGTGCTCCCAGCAGCTCACCCCTCCAGTGGCTGTTCTTTCTACCTGTCAAAGCT  
TGTGCTGACACATATACTGGGAGGTGACCCCCAGCTGCGGCTGCCCCACCAGGCACATCA  
AGCCAGGCCCCGGCCCTGCTTTCACCTGGCTCGCCTATGGCTAGTCTGT

>1967 len=230 tot-seq=7

CACACATCCCAGCAACCATGGACCCCCCACACTCACCCGAAAAGTACACTGTACAT  
GGGCAGAGCTGAGAGCACCCCTGCCACCCCCACACCAGAAGCCCAGGGGCACAGCACAGA  
GGACTGCGCAGAGCTGAGGGTGCCAGGCAGCTGGGGTTCCTGCAGCCACCCCTCCCCACC  
AGGCCCTCCGGAGGCGTCCACAGAGGGCACATGCACCTGGCTGTGAGGA

>1968 len=234 tot-seq=7

GTGTGGAGAGAGTGAGACTGGAGGCCACCAGGCCAGGCACAGTGGCTCATGTCTGTAATC

CCAGCACTTTGGGAGGCCAGGGTGGGTGGATCACCTGAGGTTGGGAGTTGGAGACCAGCC  
TGACCAACATGGAGAAACCCCGTCTCTACTAAAAATACAACTTAGCTGGGCATGGTGGT  
GAGCAGCTATAATCCCAGCTACTCGGGAGGCTGAGGCAGGAGAATTGCTTGAAC

>1969 len=234 tot-seq=7

CAGCTGGCCCAGGAGGAGGAGAGCGAGGCCAGGCGCCTGGCCACTATGATGATGAAGAAG  
CCGGAGAAGTACCTGTACCAGAAGATCATGTTTGACAAAAGGCGAAAAAGCCAAGAGGCC  
AAAAAGCTACCAGAGTAGCAGAAAGCCCATGATGAGGCAGTGAGATCTGAGAAGGCCGAA  
AAATCAAGGCCGATTTGAGTGCCAGTGGCCCCTCAGAGGGCCGAGGCCAGCTCC

>1970 len=161 tot-seq=7

TGGGGAATATTGCGCAATGGGGGAAACCTGACGCAGCGACGCCGCGTGCGGGATGAAGG  
CCTTCGGGTTGTAAAGCTCTTTTATTAGGGAAGAACGTTGGTAGGAGTGAAAAATCTACC  
AAGTGACGGTAACTAACCAGAAAGGGACGGCTAACTACGTG

>1971 len=161 tot-seq=7

TGGGGAATATTGCACAATGGGCGCAAGCCTGATGCAGCAACGCCGCGTGAAGGATGAAGG  
TCTTCGGATTGTAAAGCTCTGTTATACGGGACGAACGGCAAGGTGGTAAATAGCCATCAT  
GAGTGACGGTACCGTAAGAGAAAGCCACGGCTAACTACGTG

>1972 len=102 tot-seq=6

AAGAGATTGCAAAAAAGAATTAACACAGGCTGTTACAGTAACCCAGGTGGAAACTGA  
TGAGAATAGAATGTTTGCTTTTAATTCATAGGTGTCATTTGG

>1973 len=104 tot-seq=6

CAGGCACAACAGCAGGCAGGCGCAGACGGTAAAGATGAATTCGCTTTCTTCGATACGGT  
GGGGTAGTCAATTTCAACTCCATGCCACGGTATTTTTTCGGCA

>1974 len=105 tot-seq=6

CCCAGTGCCTACAGTCTCCATCAGAGAAGCCACATCTGAGGATGCTGTAGGAGTCACTGG  
GATGATACAGAACCGCATCACCCTGAACCGGAAACCTCACAACA

>1975 len=106 tot-seq=6

CCAATCACATCCAGGACAGCCCAAGGCATCTGTACCTGGTGTAAACCAATCCCCTCTGAAT  
AAACAGCTCACTCAGCTTAGGTTCCCTCCTCCTCCTCCTGCTCTGC

>1976 len=107 tot-seq=6



AAGTCACGGTCACTGGATAGCTTCACTAAGTCATAAACTACACGGGCCAGCCGAGAGGC  
TGCCTGTGGCCACTGGTGGGCTATGCGTGAAGGCTGAGGCGTGCGTT

>1977 len=110 tot-seq=6

TGGGGAATATTGCGCAATGGGCGCAACTCTGATGCAGCGACGCCGCGTGCGGGATGAAGG  
CCTTCGGGTGCGTAAACCGCTTTTGTGGGAGCAAGCCTTTTGGGTGAGT

>1978 len=110 tot-seq=6

CCTGAAGCCAGGAGGAGGGTCAAAGCAAAGCCAGAGAGGCAGCTCTTCTGGAACACATGG  
GGCATGTGCGAGTGGACAGGAAGTTGGTGTAGCACCAGGCAGTGTCTAGAC

>1979 len=112 tot-seq=6

GACAGGGAGCACACAGGCTGGGAGTGCAGGCCTTTTGTAAAGTGTGGAAAGGGTGATTC  
TAGTGGCCCTGAGAGCTGCAGCCCTTGTCTGGCTGATCAGGAAGCTACTG

>1980 len=114 tot-seq=6

TGGGGAATCTTGCAGCAATGGGCGCAACCCTGATGCAGCGACGCCGCGTGCGGGATGAAGG  
CCTTCGGGTGCGTAAACCGCTTTTGATTGGGAGCAAGCATTTCGGGTGAGTGTACC

>1981 len=117 tot-seq=6

CCCTGACGCAGCGACGCCGCGTGCGGGATGAAGGCCTTCGGGTTGTAAACCGCTTTTGAT  
TGGGAGCAAGCCTTTTGGTGTAGTGTACCATACGAATAAGGACCGGCTAATTACGTG

>1982 len=117 tot-seq=6

AAAGCAAAACAGAAAGTCTCTGTTCTTGTGGAGTTTCTAGTGGGCATGTGTGGTGGTCAG  
AGACTCCTGAGATAAGCAGTCCTACTATTTTACTATCTCAAATCCTCCAAAAGAGG

>1983 len=118 tot-seq=6

GAAGGGCTTGAGAGAGCACCCACAGTGGGAGGGAAGCCTGACGGAGTCTTCCATCTTATA  
TATAAAAATATAAGTAACTTACATTTTATATGACCTTGCCCTAGCTCTTTGAGGTCC

>1984 len=122 tot-seq=6

TAAGGAAGCCAGCAGTGGGTAAGGAAGCCAGCAGTGGGTAAGGAAGCCAGCAGTGGGTAA  
GGAAGCCAGCTATGGGTAAGGAAGCCAGCTGTGGGTAAGGAAGCCAGCTATGGGTAAAGA

AG

>1985 len=123 tot-seq=6

TAGGGAATCTTCCACAATGGACGCAAGTCTGATGGAGCAACGCCGCGTGAGTGAAGAAGG

GTTTCGGCTCGTAAAGCTCTGTTGTTGGTGAAGAAGGATTAGAAAGTCACGGCTAACTAC  
GTG

>1986 len=124 tot-seq=6

AAGCATCGGCAGTCAGGGGTGACTTTTTTTTTGGAGCAAAGGCATTAGACAAGATGACAC  
GCTGACAGGTTTCAGAAAACAGTGAATGCCGTGCCAATCAGCAGATAATTTGTGTGTTTGC  
AGCG

>1987 len=124 tot-seq=6

GGAACATGTCCAGGCAACTCTTGGGCTGACGGGGCCAAGAGGTGGCTGATGTGGCCCTTT  
TGCCACCCTTGATCCTCCCCTAAATCTTCATCCCCAGCCCTGTAGCCATCTCCCCTGGG  
CCCC

>1988 len=125 tot-seq=6

TATGCTTTAAAGATATAATTCATCATGCCAAAGAAGTCAAGACAGGAGTTTAAAGCAATT  
GAGCATATTACATCCACAACCTGAGAAGCAGAGAACAGCTGATCATGGTGGCGCATGCTTC  
TAATC

>1989 len=126 tot-seq=6

GCCGACTAAGTGTGAGGATTTGGGGCCTACCCTATAAGTAGCCACAGTAGGAACAACCT  
CCAAAGACTCGGAAAACTCAAGTAGATTACTTTTAATAGGGCAGCTTCTTGTTCTCGGG  
ATCACC

>1990 len=129 tot-seq=6

GCTGCTCCTTCAGCTCTCGGTTCTGTGACAGTGCTCTGCTGATGGTGGTGGCGTCACTCT  
GCATGCTCTCCAGGATCTGCTTGCGCTCCTCGGCCTGCTCGCTCCAGCGCTGGGCCTCCC  
GCTCCAGCT

>1991 len=129 tot-seq=6

CAAGGTGAGAGGCAGCAGCAAGGTGAGAGGCAGCAGCAAGGTGAGAGGCAGCAGCAAGGT  
GAGAGGCAGCAGCAAGGTGAGAGGCAGCAGCAAGGAACAGAGCCGGTTCCTCAGGGCTAG  
GGACATGGA

>1992 len=134 tot-seq=6

TAGGGAATCTCCACAATGGACGCAAGTCTGATGGAGCAACGCCGCGTGATTTAGAAGGC  
CTTCGGGTTGTAAAAATCTTTTGTATAGGAAGAAAATGACAGTACTATACGAATAAGGTC

CGGCTAAATACGTG

>1993 len=135 tot-seq=6

TGGGGAATATTGCACAATGGGGGGAACCCTGATGCAGCAACGCCGCGTGAGTGAAAAAGT  
ATTCGGTATGTAAAGCTCTATCAGCAGGGAAGAAGATGACGGTACCTGATTAAGAAGCC  
CCGGCTAACTACGTG

>1994 len=135 tot-seq=6

TGGGGAATATTGGACAATGGGCGCAAGCCTGATCCAGCAATGCCGCGTGAGTGATGAAGG  
CCTTCGGGTTGTAAAGCTCTTCGCACGCGACGATGATGACGGTAGCGTGAGGAGAAGCC  
CCGGCTAACTTCGTG

>1995 len=135 tot-seq=6

TCGGGAATTTTGGGCAATGGGCGAAAGCCTGACCCAGCAACGCCGCGTGAGGGATGAAGT  
ATTCGGTATGTAAACCTCGAAAGAATGGGAAGAATAAATGACGGTACCATTATAAGCT  
CCGGCTAACTACGTG

>1996 len=135 tot-seq=6

TGGGGAATATTGGACAATGGGGGAAACCCTGATCCAGCAATGCCGCGTGAGTGACGAAGG  
CCTTAGGGTTGTAAACTCTTTTCTAAGTGAAGATGATGACGGTAACTTAGGAATAAGCT  
CCGGCTAACTTCGTG

>1997 len=135 tot-seq=6

TAGGGAATCTTCGGCAATGGGGGAAACCCTGACGCAGCAACGCCGCGTGCGGGATGAAGG  
CCTTCGGGTTGTAAACCGCTTTCAGCAGGGAAGACATCGACGGTACCTGCAGAAGAAGCC  
CCGGCTAACTACGTG

>1998 len=135 tot-seq=6

TGGGGAATATTGCACAATGGAGGGAACCTCTGATGCAGCGATGCCGCGTGAGGGAAGAAGG  
TTTTCGGATTGTAAACCTCTGTCAACGGGGACGAAAATGACGGTACCCGAGAAGGAAGCT  
CCGGCTAACTACGTG

>1999 len=135 tot-seq=6

TAGGGAATCTTCGGCAATGGACGGAAGTCTGACCGAGCAACGCCGCGTGAACGATGAAGG  
TCTTCGGGTCGTAAAGTTCTGTTGCAGGGGAAGATAATGACGGTACCTTGTGAGGAAGCC  
CCGGCTAACTACGTG

>2000 len=135 tot-seq=6

TGCTCTAAGATGAAGACGCAAAAGGAGAAAAAGAACAAAACCTTAAAGAGCTTCCTCCCAA  
CCTACTTGCTGCTTGCCAAAGCCCACCAATCCACTGCTCCAAGGCACAGCCAACCACTCT  
CCCCGAGAACCACAC

>2001 len=135 tot-seq=6

TAGGGAATCTTCCACAATGGACGCAAGTCTGATGGAGCAACGCCGCGTGAGTGAAGAAGG  
CCTTCGGGTCGTAAAGCTCTTTTATATGGGAAGATAATGACGGTACCATAAGAAAAAGCC  
CCGGCTAACTACGTG

>2002 len=135 tot-seq=6

TGGGGAATATTGGGCAATGGGCGAAAGCCTGACCCAGCGACGCCGCGTGAGCGAAGAAGG  
TCTTCGGATTGTAAAGCTCTGTTGATAGGGACGATAATGACGGTACCTATCGAGGAAGCC  
ACGGCTAACTACGTG

>2003 len=135 tot-seq=6

ATTTGCTATGGATCACTAGTGGGTAAACAAGAAGGCATGTGTGCACATGATAGTCATTAA  
ATGACAGGCAAGAGTTACATGTACAAGCGAAATGATAAAGTGGCCCCCTCTAGTAGATGA  
TGTCTGTGTCCATTC

>2004 len=135 tot-seq=6

TGGGGAATATTGCACAATGGGGGAAACCCTGATGCAGCGACGCCGCGTGAGGAAGAAGG  
TCTTCGGATTGTAAACTCCTGTTGTTGGGGAAAGGAAGGATGGTACCCAACAAGGAAGTG  
ACGGCTAACTACGTG

>2005 len=135 tot-seq=6

TGGGGAATATTGCACAATGGGGGCAACCCTGATGCAGCGACGCCGCGTGAGCGATGAAGG  
AATTCGTTTCGTAAAGCTCTGTCCTTGGAGAAGATAATGACGGTAACCAAGGAGGAAGCA  
CCGGCTAAATACGTG

>2006 len=135 tot-seq=6

TGAGGAATATTGGTCAATGGGGGAAACCCTGATGCAGCGACGCCGCGTGAGCGAAGAAGG  
CTTTCGAGTCGTAAAGCTCTGTCCTATGAGAGGATAATGACGGTATCATAGGAGGAAGCC  
CTGGCTAAATACGTG

>2007 len=135 tot-seq=6

TGGGGAATCTTGACAATGGGCGAAAGCCTGATGCAGCGACGCCGCGTGCGGGATGAAGG  
TCTTCGGATCGTAAAGTTCTGTTGCAGGGGAAGATAATGACGGTACCCTGTGAGGAAGCC  
CCGGCTAACTACGTG

>2008 len=135 tot-seq=6

TGGGGAATATTGCACAATGGGCGCAAGCCTGATGCAGCAACGCCGCGTGAACGATGAAGG  
TCTTCGGATCGTAAAGTTCTGTTGCAGGGGAAGATAATGACGGTACCATAAGAAAAAGCC  
CCGGCTAACTACGTG

>2009 len=135 tot-seq=6

TGAGGAATATTGGACAATGGGCGGAAGCCTGATCCAGCCATGCCGCGTGAGCGAAGAAGT  
ATTCGGTATGTAAAGCTCTATCAGAAGGGAAGAAAATGACGGTACCTTACTAAGAAGCT  
CCGGCTAAATACGTG

>2010 len=135 tot-seq=6

TGGGGAATATTGGACAATGGGCGAAAGCCTGATCCAGCAATGCCGCGTGTGTGAAGAAGG  
TCTTCGGATTGTAAAGCACTTTCGACGGGGACGATGATGACGGTACCCGTAGAAGAAGCC  
CCGGCTAACTTCGTG

>2011 len=135 tot-seq=6

TGAGGAATATTGCGCAATGGGGGAAACCCTGACGCAGCAACGCCGCGTGCGGGATGAAGG  
CCTTCGGGTTGTAAACCGCTTTCAGCAGGGAAGACATCGACGGTACCTTACTAAGAAGCT  
CCGGCTAAATACGTG

>2012 len=135 tot-seq=6

TGGGGGATATTGCGCAATGGGGGCAACCCTGACGCAGCAACGCCGCGTGAAGGAAGAAGG  
TTTTCGGATCGTAACTTCTTTAAGTGGGGAAGATAGTGACGGTACCCACAGAATAAGCC  
ACGGCTAACTACGTG

>2013 len=135 tot-seq=6

TGGGGAATATTGCACAATGGGCGAAAGCCTGATGCAGCAACGCCGCGTGAGTGAAGAAGA  
CCTTCGGGTTGTAAAGCTCTGTCTCCAGGGACGATAATGACGGTACCTGAGGAGGAAGCC  
ACGGCTAACTACGTG

>2014 len=135 tot-seq=6

TGGGGAATCTTCGCAATGGACGAAACCCTGATGCAGCGACGCCGCGTGAGCGAAGAAGG

CTTTCGAGTCGTAAAGCTCTGTCCTATGAGAAGATAATGACGGTATCATAGGAGGAAGCC  
CTGGCTAAATACGTG

>2015 len=136 tot-seq=6

CACAATTGACCCATTGTTTTGATTATATAAACTAAATACTGTGGACTTACCACGTAAGA  
ATGATTTAACTACAACCTATGAAACGTTCAAGGTATCAATTCAGAAACCATTGTATTCTA  
TTGGACATCAGTAGGA

>2016 len=136 tot-seq=6

TGGGGAATATTGCACAATGGGGGAAACCCTGATGCAGCAACGCCGCGTGAAGGAAGACGG  
TCTTCGATTGTAAACTTTTTGTTCTTGGTGAAGAAGAATGACGGTAGCCAAGGAGGAAGC  
CACGGCTAACTACGTG

>2017 len=136 tot-seq=6

TGGGGAATATTGCGCAATGGAGGAAACTCTGACGCAGTGACGCCGCGTATAGGAAGAAGG  
TTTTAGGATTGTAAACTATTTTAGACAGGGAAGAAAAAAGACAGTACCTGTAGAATAAGC  
TCCGGCTAACTACGTG

>2018 len=136 tot-seq=6

TGGGGGATATTGCGCAATGGGGGAAACCCTGACGCAGCAATGCCGCGTGAAGGAAGAAGG  
TTTTCGGATTGTAAACTTCTTTTGTAAAGGACGAAGAATGACGGTACTTAACGAATAAGC  
TCCGGCTAACTATGTG

>2019 len=136 tot-seq=6

TGGGGAATATTGCGCAATGGAGGAAACTCTGACGCAGTGACGCCGCGTATAGGAAGAAGG  
TTTTCGGATTGTAAACTATTGTCGATAGGGAAGAAAAAAGACTGTACCTATCAAGAAAGC  
TCCGGCTAACTACGTG

>2020 len=136 tot-seq=6

TGGGGAATATTGCGCAATGGGGGAAACCCTGACGCAGCAACGCCGCGTGATTGAAGAAGG  
CCCTCGGGTTGTAAAGATCTTTAATCGGGGACGAAGAATGACGGTACCCGAAGAATAAGC  
TCCGGCTAACTACGTG

>2021 len=136 tot-seq=6

ATGAGTGTCCCAGGTACCATGGGCCTTCCCTATGTTCCCTGAGCCTCTGAGAGGGTGGAGA  
CCACAGCAGGCATGTGGTACCAGATGAAGGAGTGAGGGAGTAAACCAACGACCGCCATGG

CCTCCAATGGATGTCT

>2022 len=136 tot-seq=6

AGAGGGGCTGTGGTGTGGCCTTCACACACTGCAACTCCTGGAGGTCGGGCAGGGGCAGGA  
TGTCAGACAGTGGACGCATGAGTGGGGAAGCCTTCAGCCACCCTGACTCCACCTAGGAG  
GTGCCCCAAGGCAGAA

>2023 len=136 tot-seq=6

TTGGGAATCTTGACAATGGGGGAAACCCTGATGCAGCGACGCCGCGTGGAGGATGAAGG  
ATCTAGGTCTGTAACTCCTTTTTTCAGGGAAAGACTTAGGACGGTACCCTGAGAATAAGC  
TCCGGCTAACTACGTG

>2024 len=136 tot-seq=6

TGGGAATATTGCACAATGGGGGAAACCCTGATGCAGCGACGCCGCGTGAGGGAAGAAGG  
TTTTTGGATTGTAACTCTGTCCTTGGTAAAGAAGCAAGACGGTAGCCAAGGAGGAAGC  
CACGGCTAACTACGTG

>2025 len=136 tot-seq=6

TCGGGAATATTGCGCAATGGAGGAAACTCTGACGCAGTGACGCCGCGTATAGGAAGAAGG  
TTTTCGGATTGTAACTATTGTCCACAGGGAAGAAACAAGACTGTACCTGTGAAGAAAGC  
TCCGGCTAACTACGTG

>2026 len=136 tot-seq=6

TAGGGAATTTTTCGCAATGGGGGAAACCCTGACGCAGCAACGCCGCGTGAACGAGACGCC  
CTTCGGGGTGTAAAGTTTTGTGTCAGTGGGGACGAACAAATGACGGTACCCACAGAGGAAGC  
ACCGGCTAACTCCGTG

>2027 len=137 tot-seq=6

TGGGAATATTGGGCAATGGGGGAAACCCTGACCCAGCAACGCCGCGTGGAGGGAGAAGG  
TTTTCGGATCGTAACTCCTGTCCTCAGGGAAGAGCAGAAGACGGTACCTGAGGAGGAAG  
CCCCGGCTAACTACGTG

>2028 len=137 tot-seq=6

TGGGGATATTGCACAATGGGGGAAACCCTGATGCAGCGACGCCGCGTGGACGAAGAAGT  
ATTCGGTATGTAAAGTCCTATCAGCAGGGAAGAAGAAATGACGGTACCTGACTAAGAAG  
CCCCGGCTAACTACGTG

>2029 len=137 tot-seq=6

TGGGGGATATTGCACAATGGGGGAAACCCTGATGCAGCGACGCCGCGTGAGGGAAGACGG  
CCTTCGGGTTGTAAACCTCTGTCTTCGGGGACGAATAAATGACGGTACCCGAGGAGGAAG  
CCACGGCTAACTACGTG

>2030 len=137 tot-seq=6

TGGGGAATATTGGGCAATGGGGGAAACCCTGACCCAGCAACGCCGCGTGAAGGAAGAAGG  
TCTTCGGATTGTAAACTTCTTTGATCAGGGACGAAGAAATGACTGTACCTGAAGAACAAG  
TCACGGCTAACTACGTG

>2031 len=137 tot-seq=6

CCCGCCAGCCCACAGCAGCTTCTGTCTTCACCTCCCTCAGCCCCTGTGTTGCTGGGAGTT  
ACAGATCCTAAAATGTGTCAAGTGTGTCAAGCACAATGCCACCTCCCCTCTGGCCCCCTCCA  
GGTCACCTCACGGTCCC

>2032 len=138 tot-seq=6

TAGGGAATATTGCACAATGGACGAAAGTCTGATGCAGCGACGCCGCGTGAGTGATGAAGG  
CCTTCGGGTTGTAAAGCTCTGTTCTTAGGGAATAAAAAAATGAAGGTACCTAAGAAGAAA  
GGACCGGCTAACTTCGTG

>2033 len=138 tot-seq=6

TGGGGAATATTGCACAATGGGCGAAAGCCTGATGCAGCAACGCCGCGTGAAGGATGAAGG  
TCTTCGGATCGTAAACTTCTGTCCAAAGGGAAGAAACAAATGACGGTACCTTTGGAGGAA  
GCCCCGGCTAACTACGTG

>2034 len=138 tot-seq=6

TGGGGAATATTGGGCAATGGGCGAAAGCCTGACCCAGCGACGCCGCGTGAAGGAAGACGG  
TCTTCGGATTGTAAACTTCTTTTATATGGGACGAAACAAATGACGGTACCATATGAATAA  
GCCACGGCTAACTACGTG

>2035 len=138 tot-seq=6

TGGGGGATATTGCACAATGGGCGAAAGCCTGATGCAGCGATGCCGCGTGAGGGAAGACGG  
TCTTCGGATTGTAAACCTCTGTCTTTGGGGACGAAACAAATGACGGTACCCAAGGAGGAA  
GCACCGGCTAACTACGTG

>2036 len=138 tot-seq=6



CAGCAGGAAAGAAGTTATACCAAAAACGACTTGTACACCACAGACATTATAACCCTTTCC  
TCAAAGAAACAGTCATGTTCTGTTGGGTATTATGGACAGGTCTCTGGAAATTTATCTAAT  
AAAGACCAACAACTTCC

>2037 len=138 tot-seq=6

TGGGGGATATTGCACAATGGGGGAAACCCTGATGCAGCAACGCCGCGTGAAGGAAGAAGG  
TCTTCGGATTGTAACTTCTGTTTTTAGTGAAGAAACAAATGACGGTAGCTAAAGAGGAA  
GCCACGGCTAACTACGTG

>2038 len=138 tot-seq=6

CCCGCACAGCCTGTATCCCCACTGACTCAAACCCTAACACAGAATGCATCCCCAGTAAA  
TAAACTGTAGGGGCTACCCAGGGATAAGGCAGGGATTTCTCTAGGACATCACCCACCCAG  
CTTCCTTAAGCTAGAACA

>2039 len=138 tot-seq=6

TGGGGAATATTGCACAATGGGCGAAAGCCTGATGCAGCGACGCCGCGTGAGCGAAGAAGT  
ATTTCCGGTATGTAAAGCTCTATCAGTAGGGAAGAAAGAAATGACGGTACCTACAGAAGAA  
GCGACGGCTAAATACGTG

>2040 len=138 tot-seq=6

TGAGGAATATTGGTCAATGGCCGGGAGCCTGACCCAGCAACGCCGCGTGAAGGAAGAAGG  
CTTTCGGGTTGTAACTTCTTTTCTGAGGGACGAAGCAAGTGACGGTACCTTAGGAATAA  
GCCACGGCTAACTACGTG

>2041 len=139 tot-seq=6

TGAGGAATATTGGTCAATGGGCGAGAGCCTGAACCAGCCAAGTAGCGTGCAGGATGACGG  
CCCTATGGGTTGTAACTGCTTTTATATGGGAATAAAGAAATGACGGTACCTACAGAAGA  
AGCGACGGCTAAATACGTG

>2042 len=140 tot-seq=6

TGGGGAATATTGGACAATGGGCGGAAGCCTGATCCAGCAACGCCGCGTGAGGGATGACGG  
CCTTCGGGTTGTAACTTCTTTTCGGTAGGGACGAAGCGCAAGTGACGGTACCTACTAAAG  
AAGCACCGGCCAACTACGTG

>2043 len=140 tot-seq=6

TGGGGAATATTGCACAATGGGCGCAAGCCTGATGCAGCAACGCCGCGTGCGGGATGACGG

CCTTCGGGTTGTAAACCGCTTTCAGTTCCGACGAAGCGCAAGTGACGGTAGGAACAGAAG  
AAGGACCGGCCAACTACGTG

>2044 len=140 tot-seq=6

TAGGGAATCTTCCACAATGGACGCAAGTCTGATGGAGCAACGCCGCGTGCGGGATGACGG  
CCTTCGGGTTGTAAACCGCTTTCGCCTGTGACGAAGCGTGAGTGACGGTAATGGGTAAAG  
AAGCACCGGCTAACTACGTG

>2045 len=140 tot-seq=6

AGATTGTTCTTGACTAGCTGCCCTGCCTATCAACGGCAGGTGGCCAGGAGAAATCTGGTC  
GTGTGAGGACCAGGACCAAGCCCAGAGGGGCTCCTGTCTCCTGTCGTGTGCCTAGGGCAT  
AGCAGACAGCCCACACCCCT

>2046 len=140 tot-seq=6

TGGGGAATCTTGACAATGGGCGGAAGCCTGATGCAGCGACACCGCGTGCGGGACGAAGG  
CCTTCGGGCTGCAGACCGCTTTCAGCAGGGACGAGGCGCAAGTGACGGTACCTGCAGAAG  
AAGCCCCGGCTAACTACGTG

>2047 len=140 tot-seq=6

CGGTACTTGATTTGTAAGTCTGAGGATGAGTCCGTTGGGGTCTGGTGGCTCGAGCCAGCGC  
AGAAGGACACTGTTCTTGCTGGAGGCCTCCCAGGCCACCTTTCCTGGAATACCATCAGCC  
TTCCTGCGGGAAGGGGCAT

>2048 len=141 tot-seq=6

GAAGTGGGTGGGTGCCCATGTGGAGAGTTGGCATCCATGGGCTCCTCCCTGGTAGGAGGA  
GGGAGAGCAGACTAGGGGAGATGGGATAGTGGGAGCATGTGGACGTTGGCTTTTTTTTTT  
CTTGGTGAAATGGAAGAGTTC

>2049 len=142 tot-seq=6

TGGGGAATCTTCCGCAATGGGCGAAAGCCTGACGGAGCAACGCCGCGTGAGTGAAGACGG  
CCTTCGGGTTGTAAACCGCTTTTGATTGGGAGCAAGCCTTCGGGTGAGTGTACCTTTTGA  
ATAAGCGCCGGCTAACTACGTG

>2050 len=143 tot-seq=6

TAGGGAATTTTCGGCAATGGGGGCAACCCTGACCGAGCAACGCCGCGTGCGGGATGAAGG  
CCTTCGGGTTGTAAACCGCTTTTGATTGGGAGCAAGCCTTTGGGTGAGTGTACCTTTTCG

AATAAGCGCCGGCTAACTACGTG

>2051 len=143 tot-seq=6

GGGAAGGAGTGGATAGGGCACTCTCACGGCTTGAGGATGCAGAGCGGAGCTTGCCCTTGG  
ATGGCACAGCCGTCCTTAGGAGGAGTTGTGGCCCTCAGTCCACACCCGGCCTCGGCCTC  
CAGGTCAGAGTTTGGGATGTTGA

>2052 len=143 tot-seq=6

TGAGGAGTATTCCACAATGGGCGAAAGCCTGATGGAGCAATGCCGCGTGCAGGATGAAGG  
CCTTCGGGTTGTAAACCGCTTTTGATTGGGAGCAAGCCTTTTGGGTGAGTGTACCTTTCG  
AATAAGCGCCGGCTAACTACGTG

>2053 len=147 tot-seq=6

GGATTTTGTAGTTTTCTGAAGGGATGGGATTTACCCAAACCCCGGTTTACTCCGG  
GATAGGTTACCTCTTGATGGTAAGGCTTCGGAAAAGTGGGTACCACGCGGAGAAGTACA  
GTGACTAACATGCTCCTTCTTATTCT

>2054 len=147 tot-seq=6

TGGGAATATTGCACAATGGGCGCAAGCCTGATGCAGCGACGCCGCGTGAGGGATGACGG  
CCTTCGGGTTGTAAACCTCTTTCAGTAGGGAAGCAGCCTTTTTTGGGGTGACGGTACCT  
GCAGAAGAAGCGCCGGCTAACTACGTG

>2055 len=147 tot-seq=6

TTAGGAATCTTCCACAATGGGCGCAAGCCTGATGGAGCGACGCCGCGTGAGGGATGAAGG  
TTCTCGGATCGTAAACCTCTGAACTAGGGACGAAAGAGCCGTATGGCAGATGACGGTACC  
TAGGTAATAGCACCGGCTAACTCCGTG

>2056 len=148 tot-seq=6

TTAGGAATCTTCCGCAATGGACGGAAGTCTGACGGAGCGACGCCGCTTGGAGGAGGAAGC  
CCTTCGGGGTGTAAACCTCTGAACTGGGGACGAAAGCCCTGATGAGGGGGATGACGGTAC  
CCAGGTAATAGCGCCGGCCAAGTCCGTG

>2057 len=148 tot-seq=6

GGAGGCCGGGGAGGCACGCTGCTCCCCCTCTCAGCCTTGCCAGTGTCCAGACCTTCAA  
AAGAAGCCAGAAAATTCACGTTTGTGGGAATCCACAATTCATAGCTTTTCAAACA  
GTGCGGGAAGAAAAGTGGGTTTGGCCCA

>2058 len=149 tot-seq=6

CCTCGAGGCAGCAGTGGGGATATTGCACAATGGGGGAAACCCTGATGCAGCGACGCCGC  
GTGGGTGAAGACGGCCTTCGGGTTGTAAAGCCCTGTTGAGGGGGACGATAATGACGGTAC  
CCCTTTAGAAAGCCACGGCTAACTACGTG

>2059 len=149 tot-seq=6

CCCATTGGCCATAGCACACAATCCGAAGCCCTCGGGACCAGGAGCTGCCTCCAGCAGGCA  
GTAGGACTGGAAATGTTTATCCTCTAGCAGCTGCTCCCAGCACTTGACCTCGACGTCATA  
GAGATACAGGGCCCCTGTATCAGTCACTG

>2060 len=149 tot-seq=6

TGGGGGATATTGCACAATGGAGGAAACTCTGATGCAGCGACGCCGCGTGAGTGAAGAAGT  
ATTCGGTATGTAAAGCTCTATCAGCAGGGGAGAAAGGCTCGCAAGAGAGATGACGGTAC  
CTGAGTAAGAAGCACCGGCTAACTCCGTG

>2061 len=154 tot-seq=6

TGAGGAATATTGGTCAATGGTCTGACGACTGAACCAGCCATGCCGCGTGAAGGTCACGGC  
CCTATGGGTCTTAAACTTCTTTTGTAAAGGGAGCAATAAGTCTCACGTGTGGGATGATGAG  
AGTACCTTACGAATAAGCATCGGCTAACTCCGTG

>2062 len=154 tot-seq=6

CAAAAGTACCTTGAAAAAATTCTAAACCAAATGAGCTAGAATCTGTATACTCAGGAGAT  
CGAGCATTCAATTGAAAAAGAACCGTTAGCTCACTTAATGACGTATCTGGAAGATACCTCA  
CTTTGTCAGTTCCACAAAGCTGGAGGTAAACCTG

>2063 len=154 tot-seq=6

TGAGGAATATTGGTCAATGGGCGAGAGCCTGAACCAGCCAAGTCGCGTGAGGGAAGACGG  
TACTAAGTATTGTAAACCTCTTTTGTACAGGGAACAAAGAGACCACGTGTGGTAAGATGAG  
TGTACCTGAAGAAAAAGCATCGGCTAACTCCGTG

>2064 len=155 tot-seq=6

TGAGGAATATTGGTCAATGGGCGTTAGCCTGAACCAGCCAAGTCGCGTGAGGGAAGTAGG  
TCCTCAGGATCGTGAACCTCTTTAGCCGGGGAGCAACGCGGCCACGCGTGGGCCGGTGA  
GCGTACCCGGAGAATAAGCATCGGCTAACTCCATG

>2065 len=155 tot-seq=6

TGAGGAATATTGGTCAATGGGCGTAAGCCTGAACCAGCCAAGTAGCGTGCAGGATGACGG  
CCCTATGGGTTGTAACTGCTTTTATGCGGGGATAAAGTGGCCACGTGTGGGTTTTTGC  
AGGTACCGCATGAATAAGGACCGGCTAATTCCGTG

>2066 len=155 tot-seq=6

TAGGGAATCTTCGGCAATGGACGGAAGTCTGAACCAGCCAAGTAGCGTGCAGGATGACGG  
CCCTATGGGTTGTAACTGCTTTTGTATGGGGATAAAGTTAGGGACGTGTCCCTATTTGC  
AGGTACCATAACGAATAAGGACCGGCTAATTCCGTG

>2067 len=155 tot-seq=6

TAAGGAATATTGGTCAATGGACGCAAGTCTGAACCAGCCATGCCGCGTGGAGGATGAAGG  
CCCTCTGGGTTGTAACTTCTTTTATGGGGGACGAGACCCCGGATTTTATCCGGCCTGA  
CGGTACCCAGGAATAAGCACCGGCTAACTCCGTG

>2068 len=155 tot-seq=6

TGAGGAATATTGGTCAATGGGCGTAAGCCTGAACCAGCCAAGTAGCGTGAAGGATGACTG  
CCCTACGGGTTGTAACTTCTTTTGTATGGGAATAAAGTTCAGTACGTGTACTGTTTTGT  
ATGTACCATAACGAATAAGCATCGGCTAATTCCGTG

>2069 len=155 tot-seq=6

TGAGGAATATTGGTCAATGGGCGAGAGCCTGAACCAGCCAAGTCGCGTGAAGGATGAAGG  
ATCTATGGTTTGTAACTTCTTTTATAAGGGAATAAAGTGTAGGACGTGTCCTATTTTGT  
ATGTACCTTATGAATAAGCATCGGCTAACTCCGTG

>2070 len=155 tot-seq=6

TGAGGAATATTGGTCAATGGGCGAGAGCCTGAACCAGCCAAGTCGCGTGAGGGAAGACAG  
TCCTATGGATTGTAACTTCTTTTGCCGGGGAGCAAAGAGCGGCACGTGTGCCGCGCCGA  
GAGTACCCGGAGAAAAGCATCGGCTAACTCCGTG

>2071 len=155 tot-seq=6

TGAGGAATATTGGACAATGGGCGCAAGCCTGACCCAGCCATGTCGCGTGCAGGATGACGG  
TCCTATGGATTGTAACTGCTTTTATACGAGAAGAAACACTCCGACGTGTCCGAGCTTGA  
CGGTATCGTAAGAATAAGGATCGGCTAACTCCGTG

>2072 len=155 tot-seq=6

TGAGGAATATTGGTCAATGGGCGAGAGCCTGAACCAGCCAAGTAGCGTGCAGGATGACGG

CCCTATGGGTTGTAACTGCTTTTATATGGGAATAAAGTGAGGGACGTGTCTCGCATTGC  
AGGTACCGCGTGAATAAGGACCGGCTAATTCCGTG

>2073 len=155 tot-seq=6

TGAGGAATATTGGTCAATGGACGCAAGTCTGAACCAGCCAAGTAGCGTGCAGGATGACGG  
CCCTATGGGTTGTAACTGCTTTTATATGGGGATAAAGGAGTCCACGTGTGGATTTTGC  
AGGTACCGCATGAATAAGGACCGGCTAATTCCGTG

>2074 len=155 tot-seq=6

GAGGATAGCCCCGCCAGGAACCAGTGCCCAAGTCTATAAGGTTAAAACAGTCCCAAAGGG  
CTGGGACTGGGGGCTTCTGCTGCAGGGGCTGGGGTACAGGCTGGGGCAAGCCTCTATCT  
CTCTGACTTGACCCGGTAACGCAGCACAAGGTAGG

>2075 len=155 tot-seq=6

TGTGGAATATTGGTCAATGGACGAGAGTCTGAACCAGCCAAGTAGCGTGAAGGATGACTG  
CCCTATGGGTTGTAACTTCTTTTATACGGGAATAAAGTTAGCCACGTGTGGTTTTTGC  
ATGTACCGTATAAATAAGGATCGGCTAACTCCGTG

>2076 len=155 tot-seq=6

TGAGGAATATTGGACAATGGGTGAGAGCCTGATCCAGCCATCCCGCGTGAAGGACTAAGG  
CCCTATGGGTTGTAACTTCTTTTGTATAGGGATAAACCTACTCACGTGTGAGTAGCTGA  
AGGTACTATACGAATAAGCACCGGCTAACTCCGTG

>2077 len=155 tot-seq=6

TGAGGAATATTGGACAATGGGCGAGAGCCTGATCCAGCCATGCCGCGTGCAGGAAGACGG  
CCCTATGGGTTGTAACTGCTTTTATACGGGAAGAAACACTCTGACGTGTCAGAGCTTGA  
CGGTACCGTAAGAATAAGGATCGGCTAACTCCGTG

>2078 len=155 tot-seq=6

TGAGGAATATTGGTCAATGGACGAGAGTCTGAACCAGCCAAGTAGCGTGCAGGATGACGG  
CCCTCTGGGTTGTAACTGCTTTTAGTTGGGAACAAAAAGGCGACGTGTGCCTCTGGA  
GTGTACCATCAGAAAAAGGACCGGCTAATTCCGTG

>2079 len=155 tot-seq=6

TGAAGAATATTGGTCAATGGACGCAAGTCTGAACCAGCCATGCCGCGTGCAGGAAGACGG  
CTCTATGAGTTGTAACTGCTTTTGTACGAGGGTAAGTGCAGGTACGTGTATCTGTTTGA

AAGTATCGTACGAATAAGGATCGGCTAACTCCGTG

>2080 len=155 tot-seq=6

TAGGGAATCTTCCACAATGGACGAAAGTCTGATGGAGCAACGCCGCGTGAGTGATGAAGG

TTTTCGGATCGTAAACTCTGTTGTCAGGGAAGAACACCCGGGAGAGGATCCCGGATTGA

CGGTACCTGACGAGAAAGCCCCGGCTAACTACGTG

>2081 len=155 tot-seq=6

TGAGGAATATTGGTCAATGGCCGAGAGGCTGAACCAGCCAAGTCGCGTGAAGGATGAAGG

ATCTATGGTTTGTAACCTCTTTTATAGGGGAATAAAGTGTGGAACGTGTTCCATTTTGT

ATGTACCCTATGAATAAGCATCGGCTAACTCCGTG

>2082 len=155 tot-seq=6

TGAGGAATATTGGTCAATGGACGAGAGTCTGAACCAGCCAAGTAGCGTGCAGGATGACGG

CCCTATGGGTTGTAAACTGCTTTTGTGGGAATAATCGACATTACGTGTCATGCATTGC

AGGTACCACATGAATAAGGACCGGCTAATTCCGTG

>2083 len=156 tot-seq=6

TGAGGAATATTGGTCAATGGACGAGAGTCTGAACCAGCCAAGTCGCGTGAAGGAAGACGG

CCCTACGGGTTGTAAACTCTTTTGTAAAGGAATAAATAGTCTTACGCGCTAAGACGTTG

CAGGTACCTTACGAATAAGGATCGGCTAACTCCGTG

>2084 len=156 tot-seq=6

TGAGGAATATTGGTCAATGGGCGGGAGCCTGAACCAGCCAAGTCGCGTGAGGGATGACGG

CCCTATGGGTTGTAAACCTCTTTTGCCGGGGAGCAACGGGGTCCTTGCGAGGGCCTTATG

AGAGTACCCGGAGAAAAAGCATCGGCTAACTCCGTG

>2085 len=159 tot-seq=6

TCACTCTGGATTTTTCTTTGATGGTGTGTAATAACCTCCCTGAAGGAGCTCCTCC

AAAAGCTTGCCATCCACAGTGGTAAAATGGTCCTAACGGGAGTGTCTCCATTTCTTCCA

TTAGGAAGAGAAAGAAATCAAACCTACCCCCCTTCCCTCA

>2086 len=159 tot-seq=6

TGGACCTGCAAGCTATCCAGAACATTGTCCTTAGCAGTGGTGAGATGGTCAGGTCAGCGC

CTGGGTCCTTCCCAGCTCAGGCATGCTTTTTGCCAGGATAGGAGCTTCTCAGGCCAGGGC

CTCTCTTGCCAGTGCAGGCAGTCAGGCCTGGCACCCAGT

>2087 len=159 tot-seq=6

TAGGGAATCTCCGCAATGGGCGAAAGCCTGACGGAGCAATACCACGTGAACGATGAAGG  
TCTTCTGATTGTAAAGTTCTTTATTTAGGAAAAAAGCGTGCTAGGAAATGAGTGCGCC  
TTGATGGTACTAATTGAATAAGTGACAGCTAACTATGTG

>2088 len=160 tot-seq=6

TGGGGAATATTGCACAATGGGGGAAACCCTGATGCAGCGACGCCGCGTGTGTGAAGAAGG  
TCTTCGGATTGTAAAGCACTTTAAGTTGGGAGGAAGGGCAGTTGCCTAATACGTAAGTGT  
TTTGACGTTACCGACAGAATAAGCACCGGCTAACTCTGTG

>2089 len=160 tot-seq=6

TAGGGAATCTCCACAATGGGTGCAAGCCTGATGGAGCAATGCCGCGTGAGTGAAGAAGG  
ACTTCGGTTCGTAAAGCTCTGTTGTTGGGGAAGAACACGGATAGGAGTCACTGCCTATCC  
CTTGACGGTACCCAACCAGAAAGTCACGGCTAACTACGTG

>2090 len=160 tot-seq=6

TAGGGAATCTCCACAATGGACGCAAGTCTGATGGAGCAACGCCGCGTGAGTGAAGAAGG  
TCTTCGGATCGTAAACTCTGTTGTTAGAGAAGAGAGATAGAGGTAGTAACTGGCCTTTA  
TTTGACGGTAATTACTTAGAAAGTCACGGCTAACTACGTG

>2091 len=160 tot-seq=6

TGGGGAATCTCCGCAATGGACGAAAGTCTGACGGAGCAACGCCGCGTGAGTGATGACGG  
TCTTCGGATCGTAAACCCTGTTGTTAGAGAAGAAAGTGCGTGAGAGTAACTGTTACGT  
TTCGACGGTATCTAACCAGAAAGCCACGGCTAACTACGTG

>2092 len=160 tot-seq=6

TAGGGAATCTCCACAATGGACGCAAGTCTGATGGAGCAACGCCGCGTGAGTGAAGAAGG  
TCTTCGGATTGTAAAGCACTTTAAGTTGGGAGGAAGGGCAGTAAGTTAATACCTTGCTGT  
TTTGACGTTACCAACAGAATAAGCACCGGCTAACTTCGTG

>2093 len=160 tot-seq=6

TGGGGAATATTGCGCAATGGGGGAAACCCTGACGCAGCCATGCCGCGTGTGTGAAGAAGG  
CCTTCGGGTTGTAAAGCACTTTAGCGGGGAGGAAGGCGGTGAGGTTAATAACCTCATCG  
ATTGACGTTACCCGACAGAAGAAGCACCGGCTAACTCCGTG

>2094 len=160 tot-seq=6



TGGGGAATATTGCGCAATGGGGGAAACCCTGACGCAGCGACGCCGCGTGCGGGATGAAGG  
CCTTCGGGTTGTAAAGCACTTTAAGTTGGGAGGAAGGGCAGTTACCTAATACGTGATTGT  
TTTGACGTTACCGACAGAATAAGCACCGGCTAACTCTGTG

>2095 len=160 tot-seq=6

TGGGGAATTTTGGACAATGGGGGCAACCCTGATCCAGCCATTCCGCGTGAGTGAAGAAGG  
CCTTCGGGTTGTAAAGCTCTTCGCAAGGGAAGAAACGATACGAGCGAATAACTCGTGTT  
AATGACGGTACCTTGATAAGAAGCACCGGCTAACTACGTG

>2096 len=160 tot-seq=6

TAGGGAATCTTCGGCAATGGGGGAAACCCTGACCGAGCAACGCCGCGTGAGTGAAGACGG  
CCTTCGGGTTGTAAAGCTCTGTGATTCTGGGACGAAAGGCCATATGTGAATAATATATGGA  
AATGACGGTACCGAAAAAGCAAGCCACGGCTAACTACGTG

>2097 len=160 tot-seq=6

TAGGGAGTTTTCGGCAATGGGGGAAACCCTGACCGAGCAACGCCGCGTGAATGATGAAGG  
CCTTCGGGTCGTAAAATTCTGTTGTAAGAGACGAACTGTGAGGGTAGGAAATGCCCTCA  
CTTGACTGTATCTTACGAGAAAGGACGGCTAACTACGTG

>2098 len=160 tot-seq=6

TGGGGAATATTGGACAATGGGGGCAACCCTGATCCAGCCATGCCGCGTGTGTGAAGAAGG  
CCTTCGGGTTGTAAAGCACTTTAGCGAGGAGGAAAGCATCAAGGTTAATACCCTTGGTG  
TGTGACGTTACTCGCAGAAGAAGCACCGGCAAACCTCCGTG

>2099 len=160 tot-seq=6

TGGGGAATCTTCGCAATGGACGAAAGTCTGACGGAGCAACGCCGCGTGTGTGAAGAAGG  
TCTTCGGATTGTAAAGCACTTTAAGTTGGGAGGAAGGGCAGTAAATTAATACTTTGCTGT  
TTTGACGTTACCGACAGAATAAGCACCGGCTAACTCTGTG

>2100 len=160 tot-seq=6

TGGGGAATATTGCACAATGGGCGCAAGCCTGATGCAGCCATGCCGCGTGTATGAAGAAGG  
CCTTCGGGTTGTAAAGCTCTGTTGTTGGTGAAGAAGGACAGGGGTAGTAACTGACCTTTG  
TTTGACGGTAATCAATTAGAAAGTCACGGCTAACTACGTG

>2101 len=160 tot-seq=6

TGGGGAATATTGGACAATGGGCGCAAGCCTGATCCAGCAACGCCGCGTGGAGGACGAAGG

TCTTCGGATCGTAAACTCCTGTCAGACGGGACGAAGGTTTCCGGGCGAGCAGTCCGGAAG  
CTTGACGGTACTGTCAGAGGAAGCCCCGGCTAACTCCGTG

>2102 len=160 tot-seq=6

TAGGGAATTTTCGGCAATGGGGGGAACCCTGACCGAGCAACGCCGCGTGAACGATGAAGG  
CCTTCGGGTCGTAAAGTTTTGTTGTTAGGGAAGAATGGCGCCTACAGGGAATGGTAGGCG  
AGTGACGGTACCTTTCGAGGAAGTCACGGCTAACTACGTG

>2103 len=160 tot-seq=6

TAGGGAATCTTCCACAATGGGCGCAAGCCTGATGGAGCAACACCGCGTGAGTGAAGAAGG  
GTTTCGGGTTGTAAAGTACTTTCAGCGGGGAGGAAGGGAGTAAAGTTAATACCTTTACTC  
ATTGACGTTACCCGCAGAAGAAGCACCGGCTAACTCCGTG

>2104 len=160 tot-seq=6

TGGGGAATATTGCGCAATGGGGGAAACCCTGACGCAGCGACGCCGCGTGAGTGAAGAAGG  
GTTTCGGCTCGTAAAGCTCTGTTGTTGGAGAAGAACGTGCGTGAGAGTAACTGTTACACGC  
AGTGACGGTATCCAACCAGAAAAGTCACGGCTAACTACGTG

>2105 len=160 tot-seq=6

TGGGGAATATTGCACAATGGGGGAAACCCTGATGCAGCGACGCCGCGTGAACGAAGAAGG  
TATTCGTATCGTAAAGCTCTGTTGTTGGTGAAGAAGGACAGGGGTAGTAACTGACCTTTG  
TTTGACGGTAATCAATTAGAAAAGTCACGGCTAACTACGTG

>2106 len=160 tot-seq=6

CTAAGAATCTTCCACAATGGACGAAAGTCTGATGGAGCGACGCCGCGTGAATGATGAAGG  
CCGTGAGGTTGTAAAGTTCTTTTCGGGAGGAGGAATGAAGTTATCAGGGAATGGATGACA  
GATGACGAGAATCCCGGAATAAGCCCCGGCTAACTACGTG

>2107 len=160 tot-seq=6

TCGAGAATCTTTCGCAATGGACGGAAGTCTGACGAAGCGACGCCGCGTGTGTGATGAAGG  
CTCTAGGGTTGTAAAGCACTTTCGCTTGGGAATAAGAGAAGACGGTTAATACCCGCTGGA  
TTTGAGCGTACCAGGTAAAGAAGCACCGGCTAACTCCGTG

>2108 len=160 tot-seq=6

TGGGGAATCTTGCACAATGGGCGAAAAGCCTGATGCAGCGACGCCGCGTGCGGGATGAAGG  
CCTTCGGGTTGTAAACTGCTTTTGTGAGGGAAGAAAAGGTCTGTGTTAATACCATAGACT

GCTGACGGTACCTGAAGAATAAGCACCGGCTAACTACGTG

>2109 len=160 tot-seq=6

TAGGGAATCTTCGGCAATGGGGGCAACCCTGATGCAGCCATGCCGCGTGAATGAAGAAGG  
CCTTCGGGTTGTAAAGTTCTTCGGTGACGAGGAAGGTTGATAGGTTAATAGCCTATCAA  
ATTGACGTTAATCACAGAAGAAGCACCGGCTAACTCCGTG

>2110 len=160 tot-seq=6

TGGGGAATATTGGACAATGGGCGCAAGCCTGATCCAGCCATGCCGCGTGTGTGAAGAAGG  
CCTTCGGGTTGTAAAGCACTTCAGCGAGGAGGAAGGGTGGTGTGTTAATAGCACATCAT  
TTTGACGTTACTCGCAGAAGAAGCACCGGCTAACTCTGTG

>2111 len=160 tot-seq=6

TGGGGAATATTGCACAATGGGGGAAACCCTGACCGAGCAACGCCGCGTGAATGAAGAAGG  
CCTTCGGGTTGTAAAATTCTGTTATAAGGGAAGAAAGGTGATAGGAGGAAATGACTATCA  
ATTGACGGTACCTTATGAGAAAGCCACGGCTAACTACGTG

>2112 len=160 tot-seq=6

TGGGGAATATTGCGCAATGGGGGAAACCCTGACGCAGCGACGCCGCGTGCGGGATGAAGG  
GTTTCGGCTCGTAAACTCTGTTGTTGAAGAAGAACGTGCGTGAGAGTAACTATTCACGC  
AGTGACGGTATTCAACCAGAAAGTCACGGCTAACTACGTG

>2113 len=161 tot-seq=6

TGGGGAATCTTCCGCAATGGGCGCAAGCCTGACGGAGCAACGCCGCGTGAGTGAAGAAGG  
TCTTCGGATCGTAAAGCTCTGTTGACGGGGACGAACGTGCGTGATGCGAACAGTGTCATG  
CAATGACGGTACCTGTGAGGAAGCCACGGCTAACTACGTG

>2114 len=161 tot-seq=6

TAGGGAATCTTCCGCAATGGACGCAAGTCTGACGGAGCAACGCCGCGTGAGTGAAGAAGG  
ATTCGGTTCGTAAACTCTGTTGTTAGAGAAGAACGTTTGTAGGAGTGGAAAATCTACC  
AAGTGACGGTAACTAACCAGAAAGGGACGGCTAACTACGTG

>2115 len=161 tot-seq=6

TGGGGAATCTTCCGCAATGGACGAAAGTCTGACGGAGCAACGCCGCGTGAACGATGACGG  
CCTTCGGGTTGTAAAGTTCTGTTATATGGGACGAACAGGATGACGGTTAATACCCGTTGT  
CCCTGACGGTACCGTAAGAGAAAGCCACGGCTAACTACGTG

>2116 len=161 tot-seq=6

TGGGGAATATTGCACAATGGGCGCAAGCCTGATGCAGCCATGCCGCGTGTATGAAGAAGG  
TTTTCGGATCGTAAAGCTCTGTTGTTAGAGAAGAACGTTGGTAGGAGTGAAAAATCTACC  
AAGTGACGGTAACTAACCAGAAAGGGACAGCTAACTACGTG

>2117 len=161 tot-seq=6

TAGGGAATTTTCGTCAATGGGGGGAACCCTGAACGAGCAATGCCGCGTGAGTGAGGAAGG  
TTTTCGGATCGTAAAGCTCTGTTGTAAGAGAAGAACGAGTGTGAGAGTGGAAGTTCACA  
CTGTGACGGTATCTTACCAGAAAGGGACGGCTAACTACGTG

>2118 len=161 tot-seq=6

TGGGGAATATTGCGCAATGGGGGTAACCCTGACCGAGCAACGCCGCGTGAGTGAAGAAGG  
TTTTCGGATCGTAAAGCTCTGTTGTAAGTCAAGAACGAGTGTGAGAGTGGAAGTTCACA  
CTGTGACGGTAGCTTACCAGAAAGGGACGGCTAACTACGTG

>2119 len=161 tot-seq=6

TGGGGAATATTGGACAATGGGGGGAACCCTGATCCAGCCATGCCGCGTGTGTGAAGAAGG  
CCTTTGGTTGTAAAGCACTTTAAGCGAGGAGGAGGCTACTCTAGTTAATACCTAGGGAT  
AGTGGACGTTACTCGCAGAATAAGCGCCGGCTAACTCTGTG

>2120 len=161 tot-seq=6

TAGGGATGAGGAATATTGGTCAATGGTCCGGGAGACTGAACCAGCCAAGCCGCGTGAGGGA  
GGAAGGTACAGAGAGTCGTAAACCTCTTTTGTGAGGGAACAAAGACTGGGACGCGTCCCC  
GGATGAGTGTACCTGAAGAAAAAGCATCGGCTAACTCCGTG

>2121 len=161 tot-seq=6

TAGGGAATCTCCGCAATGGACGAAAGTCTGACGGAGCAACGCCGCGTGAGTGATGAAGG  
TTTTCGGATCGTAAACTCTGTTGTCAGGGAAGAACAAGTGCCATTCAAACAGGGTGGCG  
CCTTGACGGTACCTGACGAGAAAGCCACGGCTAACTACGTG

>2122 len=161 tot-seq=6

TGGGGAATTGTTGCAATGGGCGCAAGCCTGACGACGCAACGCCGCGTGGAGGACGAAGA  
TCTTCGGGTCGTAAACTCCTGTCGAGCGGGAAGAACACCTTCTGGTGAACAATCGGGAG  
GGCTGACGGTACCGCTAAAGGAAGCCCCGGCTAACTCCGTG

>2123 len=161 tot-seq=6

TGGGGAATTGTTTCGCAATGGGCGAAAGCCTGACGACGCAACGCCGCGTGGAGGACGAAGA  
TTTTCGGATCGTAAACTCCTTCGATCGGGACGAACGACTGGTGACCTAACACGTCATCA  
GAGTGACGGTACCGAGAGAAGAAGCCCCGGCTAACTCCGTG

>2124 len=162 tot-seq=6

TAGGGAATTTTTACAATGAGCGAAAGCTTGATGGAGCAATGCCGCGTGAACGATGAAGG  
TCTTTTTGATTGTAAAGTTCTTTATTTGGGAAGAATGACTCTAGCAGGCAATGGCTGGA  
GTTTGACTGTACCACTTTGAATAAGTGACGACTAACTATGTG

>2125 len=162 tot-seq=6

AGCTGGAAGTGGGTTCCGCCCCACTCAAAGGGTAGACTGTTGCCCTGGGTCTTACTCACT  
GAGCTTGTGATGCAGAGTGAAATTCCTATCACGGTGAGCACCATGCCAGCAACTGCTCCT  
GGGATAATAGGCAGAAATCAGGAGGGTCTGAGCTCAGCCATG

>2126 len=162 tot-seq=6

AGCTTGTGGTCCCAGCTTCTTCCCTGCACCCCGCATCAAGAGCCCTTATCCCAGGCAGCA  
CAGCTCTTGGCAGTGCTTTCTATTTCTTAAACATCCAGGACCTTCTCCCTCTCTCTCTC  
TCCCTCCTCCTGCTTGAGCAAGGCCACCCTCGCAAATTTAG

>2127 len=164 tot-seq=6

CCTGGTGTAGCAGTATCTCCACCATGGCTGGGCCACCTTTTCATGGCCGCTCATTCAAGT  
TCTGGAGCACCAGGTCCAAACTTGAAGTCCAGCCCTGCAAAGACGGGGGAGTAACATGCA  
AGTGTAACCCACTTTTCAAGAGTCCATTATATTGTTCAATCATG

>2128 len=165 tot-seq=6

AAAAGGTACATGGGCTCAGGGGCATCCTTCATTAGGTGGGACGTTGGGTCTGGCCCGGG  
CCAGTTCTGCCTGCCTGACATCAGCCTGTCTGTCTGTCTGTCTCTGTCTGCAGCACCA  
TCATCACCACCATCAGCAGATGCAGCAGGCCCGGCTCCTGTGCC

>2129 len=165 tot-seq=6

GTAACCATATGCATCGGTAGGGGCTGTTCTGCTGGAGCCCTCTGATGGCCAGGCATGG  
TCTGTCAGTGCAGGAGCTCTGATGAGGTGCCCTAGGAAGCACTCTGGTTGGGCATCTGAA  
GCTGCTCTGCAAGAGGCCATGGTCAGGCTGGAGCTCCAGGAAAGG

>2130 len=167 tot-seq=6

CACAGCCCTTATTTTGGTAGTGTGTGTGATTAGTCAGGATGCATTGACTGTTGTTGTA

AACAATGTTTGGCTCTTTGTGAAAGGCCAGTGTTTCATGTGCAGTTCAGCGTGGCTCTGCT  
CCATGCAGTCTCTCAGGATCCAGGCCTCCCCACCTTGTGGCTGTGCC

>2131 len=168 tot-seq=6

AGGGATGTATGCTGTGTGCCAGCAGCCATGGTCAGGGACAGAGGCAGAGGAGGGGTGTA  
TGCTGGTGCCAGCAACATGGTCAGGGACAGAGGCAGAGGAGGGTGTATGCTGGTGCCCA  
GCATCCATGGTCAGGGACAGAGGCAGAGGAGGGAGGCATGCTGTGTGC

>2132 len=168 tot-seq=6

TCTGATCTCTGAGTAGCCATTTTCGACCCTTCTACCCACAGAATGCATCTGGCCTGTCT  
GGGACATCACAATCCACACACACAGCCTGCAGACTCCTCTCCATCCCCAGTGTGTCTGC  
AGTTTTCTGACATGACAAGGTTTCTGCTTACAACCTGCACTCACCGTT

>2133 len=175 tot-seq=6

CCCCTCCACCCTGAGCACCAGCAGCAGCAGTGGTGTCCGTAACAAGGCTCCAGCATGAC  
CCTGTGGCTTACCCTCTACCCAGAGCACCAGCAGCAGTTGTGCAGACCCAGAAACATCT  
CTGGCTAAACAAGCCCCCAGCATGACCCTGTGGCCTCCCCCTCACCCAGAGCA

>2134 len=180 tot-seq=6

CATGCAAGTAACATGCCCGCCACCCCTGCCTAACCTGCCGGTGGGGCCTGGAGACACC  
ATTTCCATTGCCAGTATCCAGAACTGGATTGCCAATGTCGTCAATGAAACCTCGCCAG  
AAGCAAAACGAAATGCTCTTGTGTCCCGCCACCTCTGTTGCAAGCATGAAGGCAGCT

>2135 len=182 tot-seq=6

ATTGTGAAATGGAGAAATTAATCACAATCTACTCGGAACCTTGACGAAGAGGGGGACCAGA  
GTCCTTCAAGTCAGGGCTTTGTCTCCACACTTAATGAGAGGAGACTTGTATTTTAGAAC  
TCTGCTCTTAATAATTGTGTAAGCAAAGTGTGGAAATGTAATCTATATCCAATCCATCA  
AC

>2136 len=182 tot-seq=6

GGGAACCCAGTAGGGTTTACTTTAATCTATATTTCTGAAATCCCTTGAAATGTTTGA  
GAAGACCACATAATCTCTGAGTCTCACTTTTCTCCTCTGTGAAGTGCAGGTTTTGGACAA  
GGGTGGAGATAGAGGCTTTTTAGAAAGGAACTGCGTGGTATCAGCAGCAGTGGAAATGAG  
TG

>2137 len=185 tot-seq=6

TAGGGAATCTTCCACAATGGGCGCAAGCCTGATGGAGCAACACCGCGTGAGTGAAGAAGG  
GTTTCGGCTCGTAAAACCTCTGTTGTTGAAGAAGGACAGGGGTAGTAACTGACCTTTGTTT  
GACGGTAATCAATTAGAAAAGTCACGGCTAACTACGTGCCAGCAGCCGCGGTATGTCCAGA  
TCGGA

>2138 len=186 tot-seq=6

CGAGGATGCTTCTTGGAGCTGCTCTCGTTCCTCCATCCTGAAATTGATTTCTCCTGCTC  
TTGTCTCTGTGTCCCCTCAGGGTCGTGAGGGGAAGCCGGGCAAGCAGGGTGAGAAAGGCC  
AGAGGGGAGCTAAGGTAGGTCCCCTGCCTTCAAGGGTCACATCCCTCCCTAGCTCATCTC  
CCTGGG

>2139 len=186 tot-seq=6

TGGGGAATATTGCGCAATGGGGGAAACCCTGACGCAGCCAAGTAGCGTGCAGGATGACGG  
CCCTATGGGTTGTAAACTGCTTTTATGTGGGGATAAAGTGCCTGACGTGTCATGCATTGC  
AGGTACCACATGAATAAGGACCGGCTAATCCGTGCCAGCAGCCGCGGAATCAGAAGATC  
GGAAGA

>2140 len=187 tot-seq=6

CAGTAGTCACAAGTCCATGAGGTGGAGCTTGAGATTAATACAATGCCTGGCTTCTTCTCT  
TCTCCTTAAGATACTAAGGAGTAGAAGGAAAACCTAGAAATGTAACCATAATACAGGTAA  
GAGCAGTATGTGTGCAGAAATGCTTTTATGTTATATGCAATAAAAGTAAACAGGTGACTC  
TGGGGAA

>2141 len=188 tot-seq=6

CATCTGGGGTGTCCAAAGCCTGAGAATCTGTCATCCTCGGCCTTCGTGCCCTGAGCCAAC  
TCCAGCAGCTCCTTGGGACAACAGACTGTGCTTCCCCACCCCTGGAGTGGCGTCCTGCG  
GCTTCACATAGCCTGATGCCTGCCTGACATGAGGAAGGAGCACTCAAAACTTCTCGAATC  
CCACCTAC

>2142 len=189 tot-seq=6

CCTTACCTGTCACAGATACTTGACAGTGACCCACATTTTCAGAAACAGTAATTCTGCAGC  
TGGTGGAAAACAGTATGCTTTGTGGTCCCATAAGACCTAAGTATAATACCACTGATCTC  
TTTGAAGTGCCTGAGGAACCTAAAGAGGTCATCCCTGAAAAGAAAGTGTCCCTGGTGCCT  
CCTAAAAG

>2143 len=189 tot-seq=6

CAGAGACGTGGGTTCCACAGTGGGGTCTGTGGCTGCAGCGGAACACCCAGACCAGGA  
GATGGAGAACACAGCTGGAGCGGCAGCGGGAGGTGCTAATCGGGGAAGGAAAATCGGTGC  
TAATTGGGAAGGAAAAGAGAAAACAAGGGGAAAGAGAGCGGGTGCAAGACAGCTGGGAGG  
AGTGGAATT

>2144 len=190 tot-seq=6

CCCCCGCCCCACCTACACTTCCCTGCCTGGAGTCAGAACAGGGCCCGGGACCTCCAGG  
GGCCTCTGCACAAGACCCACAGGCCTCGCTGGCCTCCCTGGGCATCGGTTCTGACTTCC  
AGACCTCAGGCTCTGTCCGTGGATGCCCTTGGAGGCTGAGGGACCCTCCGTGCATGGGGT  
CTCCATCTTC

>2145 len=191 tot-seq=6

TGGGAATTTTCCGCAATGGGCGAAAGCCTGACGGAGCAATGCCGCGTGAAGGTAGAAGG  
CCTACGGGTCATGAACTTCTTTCCCGGAGAAGAAGCAATGACGGTATCCGGGGAATAAG  
CATCGGCTAACTCTGTGCCAGCAGCCGCGTAATCCTTAGATCGGAAGAGCGTCGTGTAGG  
GAAAGAGTTTG

>2146 len=199 tot-seq=6

TGATCTGGTACTGGAGTTCAGACGTGTGCTTCCGATCTCCTACGGGGCAGCAGTGGGG  
GATATTGCACAATGGGGGAACCCTGATGCAGCGACGCCACGTGAGGGATGACGGCCTTC  
GGTTGTAAACCTCTTTCAGTTGGGAAGAAGCCCTTGGGGTGACGGTACCTTCAGAAGA  
AGCACCGGCTAACTACGTG

>2147 len=199 tot-seq=6

CAAGAGATGTGAGGCATGTAGCTTTTAAGTCATGATGCCCTCACACCAGCTGGATGTGAG  
CCTGTAGCTCCTGACAGTGGGTGAACTACTGAAAACCTCCCCAGAAAGCAGAGCACTT  
AATGCCCTTCTGCTGGCAAGCTGCCTCTCTTGTCTATAGCTTCTTAGCCAATGGTTCT  
CAAAGTGTGGTTCCCCAGT

>2148 len=200 tot-seq=6

GCATAAATAATGCAGGTGCCAGAATAAAATGTAGTTATGTTGGTTTTTGTCTCTTTAGC  
TAAGCAGCTACCAAAAAAAGGAAAGAGACTGAATTGATAGATACATTTTACTGTCCAGC  
TGCCAAGAAGGCATTGCCGACAATGAGGATTTTCAATAATAACCCTAAAGAGAGGAGTT



CAGAGCATCCCATTCACTGC

>2149 len=201 tot-seq=6

CTGGAGTTCAGACGTTGCTCTTCCGATCTTCTACGGGAGGCAGCAGTAGGGAATATTGGT  
CAATGGGCGAGAGCCTGAACCAGCCAAGTCGCGTGAAGGATGACTGTCTTATGGATTGTA  
AACTTCTTTTGTAGGGGAATAAAGAACAGCACGTGTGCTGTAGTGAATGTACCCTACGAA  
TAAGCATCGGCTAACTCCGTG

>2150 len=201 tot-seq=6

TGAGGAATATTGGTCAATGGGCGAGAGCCTGAACCAGCCAAGTCGCGTGAAGGATGACTG  
TCCTATGGATTGTAAACTTCTTTTATGTGGGAATAAAAAACACTACGTGTAGTGTATTGT  
ATGTACCATATGAATAAGCATCGGCTAACTCCGTGCCAGCAGCCGCGGTATGTCAAGATC  
GGAAGAGCGTCGTGTTGAGGA

>2151 len=202 tot-seq=6

CAGTCCAAAACATTGCCCAAATCTGCCTGCTTCTCTCCCACTGCATTGCCACCACTGA  
CTCTCGCCTGGAAGACCATGAGGCCTCCCGGTGGGTGCGCTGACTCCACTCTACACACC  
AGAGCATGGGCCACCAGCCAGCATCTCATCTCTCTCCTCCTGCCCTCCGAGGTGGCCTG  
ATGTGCCACGGCCCTGCCTACC

>2152 len=202 tot-seq=6

CAGGATTTGAGAGAACTGGCCCAATTATGAAAGAAGTTCTACTTGTGGGTAAATGCTAT  
CAAACAGCATTGCCTACTACAGAGAAATCTTTCATGAAAGGAAGAGTCAATTGATGCAGC  
AAACTCTATTGTTGTCTTTTTTTATTTTTTTTTAGAAATTGACACGACCGTCCCAGTCTT  
CAGCAACCGCCACCCTGATTAG

>2153 len=203 tot-seq=6

TCTCCAGCTGGAAATGGTCTGGGGGCTATTGATGGGGCACAATGGGAGTGAGACCGGCC  
TTCAGATTGCGTGGGAACTGGGTGAGGCCTGTGACTGCCGACTTTCCTCAACTTTCCTGA  
CAACCTGCATGACTCAGCAGAGGCAGCAATCATCCTCCTAGATACACAACTCCAATGACC  
TGGGAATCTCACCCCATCCCTC

>2154 len=203 tot-seq=6

TTGGAGTGTAAGTTCCACTTTAGGATCTTCCAAAACGAGGGAGCTGGGCCTATCAGCTC  
AGAGCTCACCTGGAGGAAGGTACACTTCTAGCCCTTTGGCCCTCCTTGGGTGTGCACA

CTCTCACTCTAGTAGCCCAAGGCAGTCCTGGGAAGAAGAGTTAAAGGTACCAATTACAGG  
TAGCAAAAGCACCTGAAACACA

>2155 len=205 tot-seq=6

TCTGATAAGGACACCAGTCATTGGACTTAAGGCCTCTGCTAATCCAGTCTGGCCTCGTCT  
CAAATTGAAGAACATCTGCACACACCCCATTTC AAGTAAGATCCTATTACAGGCACCA  
GGGGTGCCTTCAATGCATCTTTTGGGGGAACACAATTCAACCCACAGCATCTTCTGTGT  
TGTTCTGCCCAAGGACAGCCACCCC

>2156 len=207 tot-seq=6

GAAGATATCAGGGGAAACGAAGAGAAAATGTCACATGGTACTGAAGCTGACTCTGCTGCC  
TAATAGCTAAAAGGCCCCAAAAGATGAGTCAAAGCTACTAGGCTCTCAGGCTAACCACA  
TATAACAATGTGACCTTGGCTACATCCCTTCATCTGCAAACTGAGCAGGCTGGATAATG  
GGTCTTCATCATCTGTTATAACAAGAC

>2157 len=207 tot-seq=6

TGGGGAATATTGCACAATGGGCGCAAGCCTGATGCAGCAACGCCGCGTGAACGATGAAGG  
TCTTCGGATCGTAAACTCTGTTGTTAGAGAAGAACACGAGTGAGAGTAACTGTTCAATC  
GATGACGGTATCTAACCAGCAAGTCACGGCTAACTACGTGCCAGCAGCCCGTAATTATG  
AGATCGGAAGAGCGTCGTGTTGGGGAA

>2158 len=207 tot-seq=6

ATTCTTACATATTCTGGTTGGACTCATGGTTAAAGAAGACAAATAGAAAACTCACACAT  
CAGCCTGGTGTGGGGATAAAACCAAAAACAGTGATGCTCACAGGCATGCCTGAGAGTGGA  
ATGGTGGTGTGGTGGGGGAGTGCCTGTTTACTGGTAGTAGGAGTAACTCTCGTCATCAT  
ATTCCAGCTCATCTATGTCATCGTCAT

>2159 len=209 tot-seq=6

TAGGGAATATTGCGCAATGGGGGAAACCCTGACGCAGCGACGCCGCGTGTGTGAAGAAGG  
TCTTCGGATTGTAAAGCACTTTAAGTTGGGAGGAAGGGCAGCTACCTAATACGTGATTGT  
TTTGACGTTACCGACAGAATAAGCACCGGCTAACTCTGTGCCAGCAGCCCGGTAATAT  
CTAGATCGGAAGAGCGTCGTGTTAGGGAA

>2160 len=212 tot-seq=6

TGGGGAATATTGGACAATGGGGGGAACCCTGATCCAGCCATGCCGCGTGTGTGAAGAAGG

CCTTATGGTTGTAAAGCACTTTAAGCGAGGAGGAGGCTCTTTTGGTTAACACCCAAGATG  
AGTGGACGTTACTCGCAGAATAAGCACCGGCTAACTCTGTGCCAGCAGCCGGTAATGGGA  
AGATCGGAAGAGCGTCGTGTAGGGAAAGAGTG

>2161 len=213 tot-seq=6

CAGACCCAGCCATGGCCAACCTCTGGAAGTCAATGCTAGCCTAGCCCACTGTCCCCA  
GAGAGCTTTCCTCCTGACCTCTCTCCACCACTTTCTGAGGCCAGGGTCCCCTAAGTTTG  
ACTTGGTGAGCGTGGTGCACACATTGGTGCTGATCTGTATCATGGCCATGAGTATAATAC  
AGGGACTACAATGCAGAGAGCAGACATAGGCAC

>2162 len=214 tot-seq=6

TAGGGAATTTTTACAATGGGCGCAAGCCTTATGAAGCAATGCCGCGTGAACGATGAAGG  
TCTTATAGATTGTAAAGTTCTTTTATATGGGAAGAAACGCTAAGATAGGAAATGATTTTA  
GTTTGACTGTACCATTGAATAAGTATCGGCTAACTATGTGCCAGCAGCCGCGTAAGAT  
CGGAAGAGCGTCGTGTAGGGAAATAGGGAATTTT

>2163 len=224 tot-seq=6

CACATCACCAACTCTATCATGGAAGCTCTCCTTATCATTCCGCTCCAGTCCTGTGATTAT  
GAGGAGGGAGTCAAAACGTCCACTAATCAGGGCAGTGTGGTGTGCTATTCACAAGCTCAT  
AACTGGCAGTAAACAGAAAGGCCCATGTCTGCTCTGCTGAGTAATTTCCACACTGAGGC  
CCTGAGCAGAGATGTCGTGTCATTTGTAACATCTGCCTTGCCAT

>2164 len=226 tot-seq=6

CCAGGGCGCTTTCCTGCCGCTCTCCTTCCCATCCTTGCTTGAAGGCAGGTTTAGTGAGGA  
GCTGAGGAGCGGGGAGGTGCTGGGGGAGGGGGACCGGGGATGCCACAGAGGAAGCCGGCT  
TTCCCGCCCGACAAGATAGGAGGAAAGGGAGATGTCACACCCCAAAGTGCTTGTGATA  
CTCCCCACAACCACCCTAGGTAGATACAGATCAATACCCTCATT

>2165 len=226 tot-seq=6

GACCCAAGGCAGCTGTGGGATTCTGGTGTCTGACTCTTGGAACAGGCTACTCCTAGGG  
GAAGGAAGACTGCAGCCACCAAAGCAGCACCTTGGGACAAAGAAAATGGAAGTGTGTGC  
TCTCCTGTGCCTCAGAGGCCCTGCCTGTGAAAAGAAGGTGACTGTGACCCTTTCAGTGG  
AGACACAGATGCTGTACTGGGCTCTGTGGAGAAGTATGGTTTGTCC

>2166 len=226 tot-seq=6

TGTGAGCATCCCCTCTGAGCATCTCTCACCACCTGCCCTGCATCTCTGCTTGGACATCTC  
AAAGGCACTCAGCCCCAGCTGGCACCTTCGGGTGCCACTTCCGTGAGCTGGAAACCTGTG  
GGTCCCTACCGACTCCTTCTAGTCACCTTTCCTTCCCCTGCCTGGTCCATGGCCCCA  
TTGTGCAGATTACACCTAAGCATAACCCAAGCCCTCTTCTGTCTG

>2167 len=227 tot-seq=6

GCTGAACTGTTTGTGGTGCATCAACTGGTTGCTTAGGTTCTTCAGCCTTAGGAGCTTCTT  
CTTTTTCTTTAACTGGTTGAGCCTTAATTTGTTGGCTACGACCTGGTAATTGCTTAGAAG  
CAGCTTCTTCAGCCTTAGAATCAATTCCAGTAGCGATTACAGTTACTACCACCTCATCGC  
CCAAGTTAGGATTAATTGAAGTACCGAAAATAATGTTTACATCGTCA

>2168 len=229 tot-seq=6

GATTTGTGTGACAACCTGGATGAGTGTAGATGACTCAGGGAAGTCAGTGGAGTTATAGTTT  
GCATGCATCAGTTAAAAAGGAAAGCCAGGTGTGGTGGTGTGAAGGGGGTGGTTCCAATGC  
TAAGGTCTGTTCTCCAGTTGATTCTTGATCTATCAGTAAAGAAAGTCAGGAACTAATTG  
CTGGGTGGAGAGGAGGAGTTTATTTGTCATGCTTTGGAGGGAGAAGAAG

>2169 len=241 tot-seq=6

GTCAGAGTCAGAGGACGAGATGTGGCCATGGAGGTCCGGATGGATGGGAGTGAGGCCGCT  
GCAGGAAAGGGCCGTGAGCAAAGGAGTTCTGGCACCTCTGGAGGCTGGCACAGGCAGGAA  
GTGGTTCTGGAAATGAAACACAGCCTCTGCCAACTCCTCGATCTTAGGATCTGTGCCCT  
CCAGAACCGTTAGACAACCAAGTGTGTGTTGTTTTACACCACCACGTTTGTGGTGATTAGT

T

>2170 len=160 tot-seq=6

TAGGGAATTTTTACAATGGGCGAAAGCCTGATGGAGCAATGCCGCGTGAGTGAAGAAGG  
TTTTCGGATCGTAAAGCTCTGTTGTTGGTGAAGAAGGATAGAGGTAGTAACTGGCCTTTA  
TTTGACGGTAATCAACCAGAAAGTCACGGCTAACTACGTG

>2171 len=160 tot-seq=6

TAGGGAATCTTCCACAATGGACGCAAGTCTGATGGAGCAACGCCGCGTGAGTGAAGAAGG  
GTTTCGGCTCGTAAAGCTCTGTTGTTGGTGAAGAAGGACAGGGGTAGTAACTGACCTTTG  
TTTGACGGTAACTAATTAGAAAGGGACGGCTAACTACGTG

>2172 len=141 tot-seq=6

TGGGGGATATTGCACAATGGGGGAAACCCTGATGGTGCGACGCCGCGTGGGGGAATGAAG  
GTCTTCGGATTGTAAACCCCTGTCATGTGGGAGCAAATTA AAAAGATAGTACCACAAGAG  
GAAGAGACGGCTAACTCTGTG

>2173 len=101 tot-seq=5

TATCTGTGGACAGAAGAGTAGGCAGGGGGATGTGGCAGTGGGCGCTTTTGAGAAGTTCTC  
TCCTGGCGGCTTGAATTTTCTCAGGGAAATGGGAAGTAAAG

>2174 len=104 tot-seq=5

TGTTCACTCCTGGGACCTCCAGAGTGA CTTGAGCCAAGGACATGCTGGCGGTTCCCCA  
CACGTAGAAGAGGGTCCCACTATTTGAAAGGTGAGGCAGCCTGC

>2175 len=106 tot-seq=5

GCAAGGAGGGGGAAGACTAGCATAGCCAAGGCTCACCTGATCCCACGGGTCTCTGGAACA  
AGTAGTGGGTGTAGGTCCAACATGTAACAGAGTCCTGGATGAGCCC

>2176 len=110 tot-seq=5

CAGGCGTTGCAGGCCGATGGGCTCGCCGTTTCGCGACACCAGCCGTATTCGCCGCGGGC  
CAGCAGTTCGAGGGCATCGTCGATCTTGTCCAAGAGCTTTTTTTCAGCT

>2177 len=110 tot-seq=5

GTGACAGATGTACTCTCTGACAGCTCTCAGTATCAGCCCAGTGGCTCCCAGCCATTGGC  
TCAGTGCAATGGACCGGCAACGCCGCTCACTATAATAACACTCATGCCTG

>2178 len=111 tot-seq=5

CCTCCTTCATCTGGAGACCCTGCAGGTGCCTGAAAAGATAATGCTTGTTCTCTTTAAGAT  
CAGTTCCTGCCTTCTCTCACTACCTCCAAACCAATAATGAGGATCATGTTC

>2179 len=112 tot-seq=5

GCCAAAGCGAGTGCGCAGGTCATCTTTTGCTGAGCTCCCCCTTAGGGGGAGCTGGCC  
GCTTCGCGGGCTGAGGGGGCAGCCTCGCCGACCGCCAGGAATCCATCCTCC

>2180 len=112 tot-seq=5

AGAAAAAGAGAAAAGGGAGTACTTATGTGGATGGGAATATAAACCTAGTTCAGCCACTGT  
GGAACGCCATTGGAGGTTTCTCAAGGAGCTTAAAGCAGA ACTACCATT CGAT

>2181 len=114 tot-seq=5

TGGGGAATCTTGCGCAATGGGGGCAACCCTGACGCAGCGACGCCGCGTGCGGGATGAAGG

CCTTCGGGTCGTAAACCGCTTTTGATTGGGAGCAAGCTTTCGGGTGAGTGCACC

>2182 len=114 tot-seq=5

AAGAGGCGAGAAGTCTCCAGGCCAGGCAGGAGAGGGAGACAGGAAAATTACTTCCCATGG

GGCAGTTCCTTCTGCTCCCCAACCCCACTCCCAGGCAGGAGAACAGGCAGGTTA

>2183 len=115 tot-seq=5

GATCTGGAGGAAGAGAGGATCTCCAGATTGAGCAGCTGTGCCACCCCTTCACTTCTG

AGTTAATGAGGCCAGAGCATCCAAGCCAGGGCCCGGTCTCCGTGAGCCCATCGCT

>2184 len=115 tot-seq=5

AGGCCTAAGGACTGTGTCCTGTGATATTAAGAGTTTAGCGAAAACGGGATCAACCAGCAA

ACAGTATTAAGAAGGATGAACTTGTGAGTTAGGACAATCCGAAAAGGGCAGTGTC

>2185 len=115 tot-seq=5

AAGAGGAGCATCCATCCGCAGAAGAAGAGCCAGTTTACATCGTAGAAGAGATACTGGAAG

AGGTTTGATGTGTTGCCGCCGGAATTACGTCAGCATTGCTGTAGTAGATCTTGG

>2186 len=116 tot-seq=5

GCCTTAAGTCCCCCTCAGAGTGTAGCCCCAGGAGATCAACACCTTCTTCGGGCTGTACAG

GCTCCTGTGGGGCAGCCAGCATGCCACATCAAATATTAAGTCTTGCTGTTTGGTC

>2187 len=116 tot-seq=5

GCCCAGCACTCCACAGCCTTCTAGGCTAAGCTCAGCCACTGCCTTTTTTGTGATTCTGCA

GCCACCAAGCTTAGGCCTCAGGCGCTGATGGAGAGATAAAGCATCGTGTGACAGGG

>2188 len=117 tot-seq=5

GAGGAGCCGGCAGGAGGAGAGAAGGGCTGGGGTCTGAGCGTGATCCCAGAAGTGCCACA

GAGAAGGGACCTCGGGTGGAGGCCACCAGGGCCTGGACTCCCTCCTCCTCCCTGGAG

>2189 len=117 tot-seq=5

TCTAAAATATCAGGTTTCAGGGGTGTTTTGATGCCACGATGCGTGGCTCTGTGGCCCT

CCTGCCCTGGTCCTCAGAAACTCTGAGTGGTGTCTGGGCTGTGGCCCTGTCATG

>2190 len=118 tot-seq=5

TTCTGTTTTTGAAGGCTCAAGTTACCTGGAAGCCAGAAATTATCTTCTGAACCTTTG

GAGTGGAGCCCAGCAGGTGTTAATGGCTTTCCTGGAGTCCTCTGTTGCCTCCCTGC

>2191 len=119 tot-seq=5

CTGGACCACATAGAGCCTCACAAGCCATAAGTCTTTCGGGTTTTCTGTAATGCACAATGG  
GCAGGCTTTGGAAGGGTCAATCCAAGTAGCATCCTGATTTAAGTTTCAAACAGATATCC

>2192 len=119 tot-seq=5

GTAATGCGCGTACGCTTGGTGGTCGTGCACGAGCGCGTAGAGCAGCGCCTCAGAGGGCGA  
GTAGGCGGCGGCGCGCCCGCTCGTCCCAGTGGAAGGCCTCGCTGGCGCGCATATCCT

>2193 len=122 tot-seq=5

GATAACCCCAACCTCCCTCTGTCTAAACAGGAAGCTCCCACGACTCTCTCCTACTCACCA  
CCTCGCAAAGGCACTTAACCCCTGGCCCGCACAGGTGCAGATGTATCTGCCCATCTACT  
CT

>2194 len=122 tot-seq=5

GACAGACAGTGCTGTAGGCCCTCCCTGCATCTAATCGATCAGCTTCCATGTAGGATTC  
CATTTATAAAGCTCTCTGCTGCTAAATAAACTCACAGCGCCAGCCCATCCCCTCCTAG  
AA

>2195 len=124 tot-seq=5

CTGTTGGGGAGCAGTCATGGGCAGCAGAGCACCTAATCCCCTGCAGTGATTCTCTTCAA  
ACTCCAGCTACAAAACCCCAAGTCAGCAGCCCAGTTCCTGGGGAAAAGAAAAGAATTTCA  
CCTG

>2196 len=124 tot-seq=5

CCTGTGCCTTCTGTTCCAGGGCACTCTGCCCCCTTCAACCTCCGGTAAAGTTCTTCACA  
GGGTAGCCCATGCATTCCAAATGCCTCATACTTGTGGGTCTCATCGTCTACCTTCTGGGT  
TTGT

>2197 len=128 tot-seq=5

AGACTGAATGTTTCATGAGCCACCCCTTGTGCCTCAGCCTTTTCTGAGCCCTTTAGGGATT  
CTTGTTGGATCCATGGAAGGTCTAACTCCTGTCTAAGTCATGCTCCTGTCTAACAATGAG  
GACCAGCA

>2198 len=130 tot-seq=5

CAGTGCTAGTGGCAAAGGGACAGACAGCCAAGAAGAAAGGGTACCTCCACTCCCGCTGGT  
CCCTCCCCTAGAGGAAGAGGAAGGAGAGAGGAGAACAGCAGCATAAGCAGCTGGCAAAGG  
CAAGGAAAGA

>2199 len=132 tot-seq=5

TCCACATCATCTGGGAAGTGGCTTCAAGGACCGGGGTGTGGTTCGAGGCCATCTGCCAG  
GATCCTGGCCCTCCCTGTCTGCCAGCTCCAGACCCTGTGGAGGCACGCGGGTCCGGCCAG  
CCCACAGCTCGC

>2200 len=132 tot-seq=5

GCTGGAGAGTGCCTAAGACGAACTGAGGGAAAGGGACAGCCTCCATCACTGCAGCATCAG  
TCGGCCGCTTTCCCTACCAGTGCTAGGGATACTGAGTAGTTTGGACCTGGAGGAATTCC  
CTACAGTGCAGT

>2201 len=133 tot-seq=5

GAGAAGGTGTGCCTGGTGTCTGTCTTTCTTATTATAAGAGGAAATTCCTCGTCCCTCCA  
TCACATTGGCCAAACTGGGTCACATGACAACCCGTAGTGGCAACAGAGTCTAGGAAAAT  
GTTCTCTAAATTT

>2202 len=134 tot-seq=5

TAGGGAATCTTCGGCAATGGACGGAAGTCTGACCGAGCAACGCCGCGTGATTTAGAAGGC  
CTTCGGGTTGTAAAATCTTTTGTATGGGAAGAAAATGACAGTACCATAACGAATAAGGAC  
CGGCTAATTACGTG

>2203 len=134 tot-seq=5

TGGGGAATTTGCACAATGGGGGAAACCCTGATGCAGCGACGCCGCGTGATTTAGAAGGC  
CTTCGGGTCGTAAAGCTCTTTTATATGGGAAGATAATGACGGTACCATAAGAAAAAGCCC  
CGGCTAACTACGTG

>2204 len=135 tot-seq=5

TGAGGAATATTGGTCAATGGGGGAAACCCTGATGCAGCGACGCCGCGTGAGCGAAGAAGT  
ATTCGGTATGTAAAGCTCTATCAGCAGGGAAGAAAATGACGGTACCTGACTAAGAAGCA  
CCGGCTAAATACGTG

>2205 len=135 tot-seq=5

TAGGGAATCTTCGCAATGGACGCAAGTCTGACGGAGCAACGCCGCGTGAGTGAAGAAGG  
ATTCGGTTCGTAAAGTTCTGTTGCAGGGGAAGATAATGACGGTACCCTGTGAGGAAGCC  
CCGGCTAACTACGTG

>2206 len=135 tot-seq=5



TGGGGAATCTTCCGCAATGGACGAAAGTCTGACGGAGCAACGCCGCGTGGAGGAAGAAGG  
TCTTCGGATTGTAAACTCCTGTTGTTGAGGAAGATAATGACGGTACTCAACAAGGAAGTG  
ACGGCTAACTACGTG

>2207 len=135 tot-seq=5

TGGGGAATATTGGGCAATGGACGCAAGTCTGACCCAGCGACGCCGCGTGAAGGACGAAGG  
CATTCTGTTGTAAACTTCTTTGGAGAGGGACGAAATTGACGGTACCTCTCGAACAAGCC  
ACGGCTAACTACGTG

>2208 len=135 tot-seq=5

CTAAGAATATTGGGCAATGGAGGAAACTCTGACCCAGCCATGCCGCGTGAATGAAGAAGG  
CCTTCGGGTTGTAAAGTTCTTTTAGTCGTGAAGATGATGACAGTAGCGACAGAAAAAGCA  
CCGGCTAACTTCGTG

>2209 len=135 tot-seq=5

TGGGGGATATTGGACAATGGGGGAAACCCTGATGCAGCAACGCCGCGTGAGTGAAGAAGT  
ATTTCCGGTATGTAAAGCTCTATCAGCAGGGAAGAAGATGACGGTACCTGAGTAAGAAGCC  
CCGGCTAACTACGTG

>2210 len=135 tot-seq=5

TGGGGAATATTGCACAATGGGGGAAACCCTGATGCAGCGACGCCGCGTGAGTGAAGACGG  
TCTTCGGATTGTAAAGCTCTGTTGCAGAGGACGATAATGACGGTACTCTGTGAGGAAGCC  
ACGGCTAACTACGTG

>2211 len=135 tot-seq=5

TGAGGAATATTGGTCAATGGGCGAGAGCCTGATCCAGCCATGCCGCGTGAGTGATGAAGG  
CCTTAGGGTTGTAAAGCTCTTTCACCGATGAAGATAATGACGGTAGTCGGAGAAGAAGCC  
CCGGCTAACTTCGTG

>2212 len=135 tot-seq=5

TGGGGAATATTGGGCAATGGGGGCAACCCTGACCCAGCGACGCCGCGTGAAGGACGAAGG  
CCTTCGGGTTGTAAACTTCTTTGATCGAGGACGATAATGACGGTACTCGAGGAACAAGCC  
ACGGCTAACTACGTG

>2213 len=135 tot-seq=5

TGGGGAATATTGGACAATGGGCGCAAGCCTGATCCAGCCATGCCGCGTGAGTGACGAAGG

CCTTAGGGTTGTAAAGCTCTTTTGGCGGGGAAGATAATGACGGTACCCGCAGAATAAGCT  
CCGGTAACTTCGTG

>2214 len=135 tot-seq=5

TGGGGAATATTGCACAATGGGGGAAGCCCTGATGCAGCAACGCCGCGTGAGTGAAGAAGT  
ATTCGGTATGTAACTTCTATCAGCAGGGGAAGATAGTGACGGTACCTGACTAAGAAGCC  
CCGGCTAACTACGTG

>2215 len=135 tot-seq=5

ATAACTGGGAAATCCAAATCTTCTCCCAAAGTACCTGTGGTGATTCAGGACAACAGTCTT  
CCCACGGGGCCCACTCCACAGATCCACATACTCCAGAGGCCCGCCAGAGTGGTGGGGTCA  
ATAGCCTCTGCTCCA

>2216 len=135 tot-seq=5

TGGGGAATATTGCGCAATGGGGGAAACCCTGACGCAGCGACGCCGCGTGCGGGATGAAGG  
CCTTCGGGTTGTAAAGCTCTTTTATATGGGAAGATAATGACGGTACCATAAGAAAAAGCC  
CCGGCTAACTACGTG

>2217 len=135 tot-seq=5

TGGGGAATATTGCACAATGGGGGAAACCCTGATGCAGCGACGCCGCGTGAGCGAAGAAGG  
CCTTCGGGTCGTAAAGCTCTTTTATATGGGAAGATAATGACGGTACCCTGTGAGGAAGCC  
CCGGCTAACTACGTG

>2218 len=135 tot-seq=5

TGGGGAATCTCCGCAATGGGCGCAAGCCTGATGCAGCGACGCCGCGTGAGCGAAGAAGT  
ATTCGGTATGTAAAGCTCTATCAGAAGGGAAGAAAATGACGGTACCTTACTAAGAAGCT  
CCGGCTAAATACGTG

>2219 len=135 tot-seq=5

TGGGGAATTTTGCACAATGGGGGAAACCCTGACGCAGCAACGCCGCGTGCGGGATGAAGG  
CCTTCGGGTTGTAAACCGCTTTCAGTAGGGAAGAAAATGACGGTACCTACAGAAGAAGCT  
CCGGCTAACTACGTG

>2220 len=135 tot-seq=5

TGGGGGATTTTGCACAATGGAGGAAACTCTGATGCAGCGACGTCGCGTGAACGATGAAGG  
CCTTCGGGTTGTAAAGTTCTGTCCTAGAGGAAGATAATGACAGTACTCTAGGAGGAAGCC

CCGGCTAAATACGTG

>2221 len=135 tot-seq=5

TGGGGGATATTGCACAATGGGGGGAACCCTGATGCAGCAACGCCGCGTGAGTGAAGAAGT  
ATTCGGTATGTAAAGCTCTATCAGCAGGGAAGATGATGACGGTACCTGCATAAGAAGCC  
CCGGCTAACTACGTG

>2222 len=135 tot-seq=5

TGGGGAATCTTGCACAATGGGCGAAAGCCTGATGCAGCAACGCCGCGTGCGGGAAGAAGG  
CCCTAGGGTTGTAAACCGCTTTCAGTAGGGAAGAAAATGACGGTACCTACAGAAGAAGGT  
GCGGCCAACTACGTG

>2223 len=135 tot-seq=5

GCGCGCAAATTACCCAATCTTGACACAAGGAGGTAGTGACAATAAATAACAATACCGGGG  
TTTTTCAACTCTGGTAATTGGAATGAGTACAATCTAAACCCCTTAACGAGGATCAATTGG  
AGGGCAAATCTGGTG

>2224 len=136 tot-seq=5

TCGGGAATATTGCACAATGGAGGAAACTCTGATGCAGTGACGCCGCGTACAGGAAGAAGG  
TCTTTGGATTGTAAACTGTTGTCGAAAGGGAAGAAAAAAGACAGTACCTTTGGAGGAAGC  
TCCGGCAAACACTACGTG

>2225 len=136 tot-seq=5

TAGGGAATTTTTCGCAATGGGGGAAACCCTGACGCAGCAACGCCGCGTGATTGATGAAGC  
CCTTCGGGGTGTAAAGATCTGTTCAGTAGGGACGAATAATGACTGTACCTACAGAGGAAGC  
ACCGGCTAACTCCGTG

>2226 len=136 tot-seq=5

TGGGGAATATTGCACAATGGGGGAAACCCTGATGCAGCAACGCCGCGTGAGTGAAGGAGT  
GCTTCGGCATGTAAAGCTCTATCAGCAGGGAAGAAGAAGGACGGTACCTGACTAAGAAGC  
CCCGGCTAACTACGTG

>2227 len=136 tot-seq=5

AAGTCTGACGGAGCAACGCCGCGTGAGTGAAGAAGGGTTTTCGGCTCGTAAAGCTCTGTTG  
TTAGTGAAGAAGGACAGAGGTAGTAACTGGCCTTTGTTTGACGGTAATTAATTAGAAAGT  
CACGGCTAACTACGTG

>2228 len=136 tot-seq=5

TGGGGAATATTGCACAATGGGCGAAAGCCTGATGCAGCGACGCCGCGTGAGGGAAGACGG  
TCTTCGGATTGTAAACCTCTGTCTTTGGGGAAGAAATCAGACGGTACCCAAAGAGGAAGC  
TCCGGCTAACTACGTG

>2229 len=136 tot-seq=5

TGGGGAATCTTGCACAATGGGGGAAACCCTGATGCAGCAACGCCGCGTGAGCAAAGAAGT  
ATTTCCGGTATGTAAAGCTCTATCAGCAGGGAATAGAAAAGAAGGTACCTGACTAAGAAGC  
CCCGGCTAACTACGTG

>2230 len=136 tot-seq=5

TGGGGGATATTGCACAATGGGGGAAACCCTGATGCAGCGACACCCGCGTGGGTGAAGAAGC  
GCTTCGGCGTGTAAAGCCCTATCAGTGGGGAAGAAAAAGGACGGTACCCAAAGAAGAAGC  
ACCGGCTAAATACGTG

>2231 len=136 tot-seq=5

CAGGAGGATGCAGGGAGAGACCACGTGATTATGCAGGGGAGAGGCCATGTGAGCACACAG  
GGAGAGGCTACAGGAGCGTGCAGGGAAAGGGTGCCATCTGCAAGCCACAGAGAGGCATGA  
GGAGGAACACACCCTG

>2232 len=136 tot-seq=5

TCGGGAATATTGCGCAATGGAGGAAACTCTGACGCAGTGACGCCGCGTATAGGAAGAAGT  
TTTTCGGAATGTAAACTATTGTCGTTAGGGAAGAGAAAGGACGGTACCTAAGGAGGAAGC  
CCCGGCTAACTATGTG

>2233 len=136 tot-seq=5

TGGGGAATATTGCGCAATGGGGGAAACCCTGACGCAGCAACGCCGCGTGAGTGAAGAAGG  
CCTTCGGGTTGTAAAGCTCTTTAATCAGGGACGAAGAATGACGGTACCTGAAGAATAAGC  
TCCGGCTAACTACGTG

>2234 len=137 tot-seq=5

TGGGGAATTTCCACAATGGGCGAAAGCCTGATGGAGCAATACCGCGTGAGGGATGAAGC  
ATCGTGGTGTGTAAACCTCTTTTCTTAAGGAAGAATCAATGACGGTACTTAAGGAATAAG  
CACCGGCTAACTCTGTG

>2235 len=137 tot-seq=5

TGGGGGATATTGCACAATGGAGGAACTCTGATGCAGCAACGCCGCGTGAGGGAAGAAGG  
TCTTCGGATTGTAAACCTTTGTTTTTGGTGACGAACAAATGACGGTAGCCAAAGAGGAAG  
CCACGGCTAACTACGTG

>2236 len=137 tot-seq=5

TGGGGAATATTGCACAATGGGCGAAAGCCTGATGCAGCGACGCCGCGTGAACGAAGAAGT  
ATTTCCGGTATGTAAAGTTCTATCAGCAGGGAAGAAAAAATGACGGTACCTGACTAAGAAG  
CTCCGGCTAAATACGTG

>2237 len=137 tot-seq=5

TGGGGGATATTGCACAATGGGCGAAAGCCTGATGCAGCAACGCCGCGTGAGGGAAGACGG  
TTTTCCGGATTGTAAACCTCTGTTCTAAGTGACGAACAAATGACGGTAGCTTAGGAGAAAG  
CCCCGGCTAACTACGTG

>2238 len=138 tot-seq=5

TGGGGAATATTGGGCAATGGGCGAAAGCCTGACCCAGCGACGCCGCGTGAAGGAAGAAGG  
CCTTCGGGTTGTAAACTTTAGTAAGCAGGGAAGAAGAAGGTGACGGTACCTGCAGAGTAA  
GCCACGGCTAACTACGTG

>2239 len=138 tot-seq=5

TGGGGGATATTGCACAATGGGCGAAAGCCTGATGCAGCAACGCCGCGTGAGGGAAGACGG  
TTTTCCGGATTGTAAACCTCTTTTCTTAGTGAAGAAGAAAATGACGGTAGCTAAGGAATAA  
GCATCGGCTAACTACGTG

>2240 len=138 tot-seq=5

TGGGGAATATTGCACAATGGGGGAAACCCTGATGCAGCAACGCCGCGTGAAGGAAGACGG  
TTTTCCGGATTGTAAACTTCTTTCTTTGTGAAGAAACAAATGACGGTAGCAAAGGAATAA  
GCATCGGCTAACTACGTG

>2241 len=138 tot-seq=5

TGGGGAATATTGGGCAATGGGCGCAAGCCTGACCCAGCGACGCCGCGTGAGGGAAGAAGG  
TCTTCGGATTGTAAACCTTTGTAGACAGGGAAGAAGCAAGTGACGGTACCTGTAAAGTAA  
GCCACGGCTAACTACGTG

>2242 len=138 tot-seq=5

TGGGGAATATTGCACAATGGGCGAAAGCCTGATGCAGCAACGCCGCGTGAGTGAAGAAGG

CTTTCGAGTCGTAAACTCTGTCGTATGGGAAGAAAAAATGACGGTACCATACAAGAAA  
GCCCCGGCTAACTACGTG

>2243 len=138 tot-seq=5

TGGGGAATATTGGGCAATGGGCGAAAGCCTGACCCAGCAACGCCGCGTGAAGGAAGAAGG  
CCTTCGGGTTGTAAACTTCTTTTGTGGGGAACGAAGGATGTGACGGTACCTCACGAATAA  
GCCACGGCTAACTACGTG

>2244 len=138 tot-seq=5

TGGGGAATATTGCGCAATGGGGGCAACCCTGACGCAGCAACTCCGCGTGCAGGAAGAAGG  
TCTTCGGATTGTAGACTGTTGTCGCAAGGGAAGAAGACAGTGACGGTACCTTGTGAGAAA  
GTCACGGCTAACTACGTG

>2245 len=138 tot-seq=5

TGGGGAATATTGCACAATGGGCGAAAGCCTGATGCAGCAACGCCGCGTGAAGGAAGAAGG  
CCTTCGGGTCGTAAACTTCTGTCCTATGGGAAGAAAAAATGACGGTACCATAGGAGGAA  
GCCCCGGCTAACTACGTG

>2246 len=138 tot-seq=5

TGGGGAATATTGCACAATGGGGGAAACCCTGATGCAGCAACGCCGCGTGAAGAAGAAGG  
CTTTCGGGTCGTAAACTTCTATCAATAGGGACGAAGAAAGTGACGGTACCTAAATAAGAA  
GCCCCGGCTAACTACGTG

>2247 len=138 tot-seq=5

TGGGGAATATTGGGCAATGGGCGCAAGCCTGACCCAGCGACGCCGCGTGAAGGATGAAGG  
CTTTCGGGTTGTAAACTTCTTTTCTCAGGGACGAAAGAAATGACGGTACCTGAGGAATAA  
GCCACGGCTAACTACGTG

>2248 len=138 tot-seq=5

TGGGGAATTTTCCGCAATGGGCGAAAGCCTGACGGAGCAATCTCGCGTGAGGGATGACTG  
CCTATGGGTTGTAAACCTCTTTTTTCAGGGAGGAATCAATGACGTGTACCTGAAGAATAA  
GCATCGGCTAACTCCGTG

>2249 len=140 tot-seq=5

TGGGGAATATTGCACAATGGACGCAAGTCTGATGCAGCGACGCCGCGTGGGGGATGAAGG  
CTTTCGGGTTGTAAACTCCTTTCAGTACAGAAGAAGCGAAAGTGACGGTATGTGCAGAAG

AAGCACCGGCTAACTACGTG

>2250 len=140 tot-seq=5

TGGGGAATATTGCACAATGGGCGCAAGCCTGATGCAGCAACGCCGCGTGCGGGAAGACGG

CCTTCGGGTTGTAAACCGCTTTCATCTATGACGAAGCTAACGTGACGGTAATAGAAGAAG

AAGCACCGGCTAACTACGTG

>2251 len=141 tot-seq=5

GAAATATTCTCAGAAGAAGTGATATCTAAGCTGGTGAAGAGTACGTAGGAGTTAGCCAGA

AAAAGAGTAGGGGGAAGAATATTCCAAGCAGAGAAAACAGCATATACAAAAGCTCAAAGG

AGAAAGAAAAGATGGTATTCT

>2252 len=142 tot-seq=5

TAGGGAATCTTCGGCAATGGGGGAAACCCTGACCGAGCGACGCCGCGTGCGGGATGACGG

CCTTCGGGTTGTAAACCGCTTTTGATCGGGAGCAAGCCTTCGGGTGAGTGTACCTTTCGA

ATAAGCACCGGCTAACTACGTG

>2253 len=142 tot-seq=5

TGGGGAATATTGGACAATGGAGGGAECTCTGATCCAGCAATTCTGTGTGTGAAGAAGG

CCTTCGGGTTGTAAACCGCTTTCAGCAGGGACGAGGCCGCAAGGTGACGGTACCTGCAGA

AGAAGCCCCGGCTAATTACGTG

>2254 len=142 tot-seq=5

TGGGGAATATTGCACAATGGGGGAAACCCTGATGCAGCGACGCAGCGTGCGGGATGACGG

CCTTCGGGTTGTAAACCGCTTTCAGCAGGGAAGAAGCCTCACGGTGACGGTACCTGCAGA

AGAAGGACCGGCTAACTACGTG

>2255 len=143 tot-seq=5

TGGGGAATATTGGACAATGGGCGCAAGCCTGATTCAGCCATGCCGCGTGAGTGATGAAGG

CCTTAGGGTTGTAAACCGCTTTTGATTGGGAGCAAGCCTTTTGGGTGAGTGTACCTTTCG

AATAAGCGCCGGCTAACTACGTG

>2256 len=144 tot-seq=5

TGGGGAATATTGCACAATGGGCGCAAGCCTGATGCAGCGACGCCGCGTGGGGGATGAAGG

CCTTCGGGTTGTAAACTCCTTCGCTACCGACGAAGCCTTGGGGTGACGGTAGGTGGA

GAAGAAGCACCGGCTAACTACGTG

>2257 len=146 tot-seq=5

AATGGACGAAAGTCTGACGGAGCAACGCCGCTGAGTGATGAAGGGTTTCGGCTCGTAAA  
GCTCTGTTGTTAGGGAAGAACAAGTATCGTTCTGAATAGGGCGGTACCTTGACGGTACCTA  
ACCAGAAAGCCACGGCTAACTACGTG

>2258 len=147 tot-seq=5

GGGAAGAGGGAGAGGCACCAGCAGGAACTCAAACTGCAGCAGCAGCAGCAGCAGCAGCA  
GCAGCAGCAAGAAGAGCAGAAGCACCAGAAGCAGCAACGGCAGAAGCAGCAGCAACAGCA  
GCAGAAGCAGGGACAGAATCACCAGCA

>2259 len=147 tot-seq=5

CAGTGTGGGAAATGAGTCGGCCATCTCACAAGTCATAGAAGGAGAGATTTGGTGGCTGAA  
CCCTCCATGTGATCGGAGCCCCAGGGGCTAAGTTACTGTAGAGAGCAGACTTCATAGATC  
CCATTGCTGGAACCAAGCATATGATAA

>2260 len=148 tot-seq=5

TCCCCAGCCGGCACTCACTCGGTCTGCAGCAGCTCAGGGTTGGGCACGCACTGGAGCCGG  
TGCGAGAGCAGCTGGAAGGCGCTGCTCTGAGGCAGGAGCATGAGCAGGCCGTAGAGGGCC  
TTGATCAGGTAGGGGTTGTTCTTCACGT

>2261 len=152 tot-seq=5

TGGGGAATCTTGCACAATGGGCGGAAGCCTGACGCAGCAACGCCGCTGGGGGATGACGG  
CCTTCGGGTTGTAAACCTCTTTCGCGATCGACGAAGCCTACGTTTCTGCGTGGGTGACGG  
TAGGTCGAGAAGAAGCACCGGCCAACTACGTG

>2262 len=152 tot-seq=5

TGGGGAATATTGCACAATGGGGGAAACCCTGATGCAGCGACGCCGCTGGAGGGTGTAGG  
CCTTCGGGTTGTGAACTCCTTTTTCTCGCGAAAAGGCACAGTTTTGGCTGTGTTGATGG  
TAGTGGGGGAAGAAGCGCCGGCTAACTACGTG

>2263 len=154 tot-seq=5

TGGGGAATCTTGCACAATGGGCGAAAGCCTGATGCAGCGACGCCGCTGCGGGATGAAGG  
CCTTCGGGTTGTAAACTGCTTTTATATGGGGATAAAGTGGGGAACGTGTTCCCTTTTGA  
GGTACCATATGAATAAGGACCGGCTAATTACGTG

>2264 len=154 tot-seq=5



TGAGGAATATTGGTCAATGGTCGAGAGACTGAACCAGCCATGCCGCGTGAAGGTGACGGC  
CCTATGGGTCTTAACTTCTTTTGTAAAGGGAGCAATAAGGTTACGTGTGGACCGATGAG  
AGTACCTTACGAATAAGCATCGGCTAACTCCGTG

>2265 len=155 tot-seq=5

TGAGGAATATTGGTCAATGGACGCAAGTCTGAACCAGCCACGTCGCGTGAAGGAAGACGG  
CCCTACGGGTTGTAACTTCTTTTGTAAAGGAATAAAGTGAGCCACGTGTGGCTTTTTGC  
ATGTACCTTACGAATAAGGATCGGCTAACTCCGTG

>2266 len=155 tot-seq=5

TGGGGAATCTTGACAATGGGCGAAAGCCTGATGCAGCGACGCCGCGTGCAGGATGACGG  
CCCTATGGGTTGTAACTGCTTTTATATGGGGATAAAGTGGGGAACGTGTTCCCTTTTGC  
AGGTACCATATGAATAAGGACCGGCTAATTCCGTG

>2267 len=155 tot-seq=5

TAAGGAATATTGGTCAATGGACGCAAGTCTGAACCAGCCATGCCGCGTGGAGGATGAAGG  
TCCTCTGGATTGTAACTTCTTTTATCTGGGAAGAAACCCATGGATTCTTCTGTGGTTGA  
CGGTACCAGATGAATAAGCACCGGCTAACTCCGTG

>2268 len=155 tot-seq=5

TGGGGAATATTGCACAATGGGCGCAAGCCTGATGCAGCCATGCCGCGTGTATGAAGAAGG  
CTCTATGGGTCGTAACTTCTTTTATATAAGAATAAAGTGCAGTATGTATACTGTTTTGT  
ATGTATTATATGAATAAGGATCGGCTAACTCCGTG

>2269 len=155 tot-seq=5

TGAGGAATATTGGTCAATGGGCGAGAGCCTGAACCAGCCAAGTCGCGTGAAGGATGAAGG  
TTCTATGGATTGTAACTTCTTTTGTCCGAGGGTAAAGTGTGCCACGTGTGGTATATTGC  
AAGTATCGGACGAATAAGCATCGGCTAACTCCGTG

>2270 len=155 tot-seq=5

TGAGGAATATTGGTCAATGGGCGAGAGCCTGAACCAGCCAAGTCGCGTGAGGGATGACGG  
CCCTACGGGTTGTAAACCTCTTTTATAAGGGAATAAAGGACATCACGTGTGGTGTTTTGC  
ATGTACCTTATGAATAAGCATCGGCTAACTCCGTG

>2271 len=155 tot-seq=5

TGAGGAATATTGGTCAATGGTCGAAGGACTGAACCAGCCAAGTCGCGTGAGGGAAGACAG

CCCTATGGGTTTTAAACCTCTTTTGTAAATGGAAGAATAAGTCTTACGTGTAAGATGATGC  
CAGTACATTACGAATAAGCATCGGCTAACTCCGTG

>2272 len=155 tot-seq=5

TGAGGAATATTGGACAATGGGCGGAAGCCTGATCCAGCCATGCCGCGTGAAGGATTACGG  
TCCTATGGATTTTAAACTTCTTTTGTACGTGAGCAATAAGGGTCACGCGTGGCCCCGATGA  
GAGTAGCGTACGAATAAGCATCGGCTAACTCCGTG

>2273 len=155 tot-seq=5

TGAGGAATATTGGTCAATGGGCGCAAGCCTGAACCAGCCAAGTAGCGTGCAGGACGACGG  
CCCTATGGGTTGTAACTGCTTTTGTACGGGGATAAAACGGCGGACGCGTCCGTCCTTGC  
AGGTACCGTACGAATAAGGACCGGCTAATTCCGTG

>2274 len=155 tot-seq=5

TGAGGAATATTGGTCAATGGTCGGGAGACTGAACCAGCCAAGCCGCGTGAGGGATGAAGG  
TGCCAAGCATTGTAAACCTCTTTTGTACAGGGAACAAAGGCATCCACGAGTGGGTGTGTGA  
GTGTACCTGAAGAAAAAGCATCGGCTAACTCCGTG

>2275 len=155 tot-seq=5

TGGGGAATCTTCGCAATGGACGAAAGTCTGACGGAGCAACGCCGCGTGAGTGAAGACGG  
CCTTCGGGTTGTAAAGCTCTGTTGTAAGGGAAGAACGGTAGATAGAGAATATCTAAGTGA  
CGGTACCTTACCAGAAAGCCACGGCTAACTACGTG

>2276 len=155 tot-seq=5

TGAGGAATATTGGTCAATGGGCGAAAGCCTGAACCAGCCAAGTAGCGTGCAGGATGACGG  
CCCTCTGGGTTGTAACTGCTTTTGTACGGGAATAAAATGCGGCACGTGTGCCGCTTTGC  
ATGTACCGTCAGAAAAAGGACCGGCTAATTCCGTG

>2277 len=155 tot-seq=5

TGGGGAATATTGGACAATGGAGGGAACCTGATCCAGCCAAGTAGCGTGCAGGATGACGG  
CCCTATGGGTTGTAACTGCTTTTATATGGGAATAAAGTGAGGGACGTGTCCCTTATTGC  
ATGTACCATACGAATAAGGACCGGCTAATTCCGTG

>2278 len=155 tot-seq=5

CAGGTGGATCACCTGAGATCAGGAGTTCGAGACCAGCCTGACCAACATGGAGAAACCCTG  
TCTCTACTAAAAATACAAAATTAGTACCAGGTGCAGTGGGGGGTGAAGTGTAGTCCCAGC

TACTCGGGAGGCTGAGGCAGGAGAATCGCTTGAAC

>2279 len=155 tot-seq=5

TGAGGAATATTGGACAATGGGTGAGAGCCTGATCCAGCCATCCC GCGTGAAGGACGACGG  
CCCTATGGGTTGTAAACTTCTTTTGTATAGGGATAAACCTAGATACGTGTATCTAGCTGA  
AGGTACTATACGAATAAGCACCGGCTAACTCCGTG

>2280 len=155 tot-seq=5

TGAGGAATATTGGTCAATGGGCGAGAGCCTGAACCAGCCAAGTAGCGTGAAGGATGACTG  
CCCTATGGGTTGTAAACTTCTTTTACAAAGGAATAAAGTCGGGTATGGATACCCGTTTGC  
ATGTACTTTATGGATAAGGATCGGCTAACTCCGTG

>2281 len=155 tot-seq=5

TGGGAATATTGCACAATGGGCGAAAGCCTGATGCAGCGACGCCGCGTGAAGGAAGGAGG  
TCCTATGGATCGTAAACTTCTTTTGACGCAGAGCAATAAAGTGTACGAGTACACTGATGA  
GAGTATGCGTCGAATAAGCATCGGCTAACTCCGTG

>2282 len=155 tot-seq=5

TGAGGAATATTGGACAATGGGTGCAAGCCTGATCCAGCCATCCC GCGTGAAGGATTAAGG  
TCCTATGGATTGTAAACTTCTTTTATACAGGGATAAACCTACTTACGTGTAAGTAGCTGA  
AGGTACTGTATGAATAAGCACCGGCTAACTCCGTG

>2283 len=155 tot-seq=5

TAAGGAATATTGGTCAATGGACGGAAGTCTGAACCAGCCATGCCGCGTGAAGGATGAAGG  
TCCTCTGGATTGTAAACTTCTTTTATGTGGGAAGAAACCACTCCTTTCTAGGGGTGTTGA  
CGGTACCATAGGAATAAGCACCGGCTAACTCCGTG

>2284 len=155 tot-seq=5

TGAGGAATATTGGACAATGGGCGCAAGCCTGATCCAGCCATGCCGCGTGCAGGATGACGG  
TCCTATGGATTGTAAACTGCTTTTGTACGGGAAGAAGCACCTCTTCGTGAAGAGGCTTGA  
CGGTACCGTAAGAATAAGGATCGGCTAACTCCGTG

>2285 len=155 tot-seq=5

TGAGGAATATTGGTCAATGGGCGAGAGCCTGAACCAGCCAAGTCGCGTGAGGGATGACGG  
TCCTACGGATTGTAAACCTCTTTTGTCTGGGGAACAACAGGGGGCACGCGTGCCTTTGTGA  
GTGTACCCGAAGAAAAAGCATCGGCTAACTCCGTG

>2286 len=155 tot-seq=5

TGAGGAATATTGGTCAATGGGCGCGAGCCTGAACCAGCCAAGTAGCGTGAAGGATGAAGG  
TCCTACGGATTGTAAACTTCTTTTACACGGGAATAAAGTGGCCTACGTGTAGGCTTTTGC  
ATGTACCGTATGAATAAGCATCGGCTAACTCCGTG

>2287 len=156 tot-seq=5

TGAGGAATATTGGTCAATGGCCGGGAGGCTGAACCAGCCAAGTCGCGTGAGGGATGACGG  
CCCTACGGGTTGTAAACCTCTTTTGCCGGGGAGCAAGAACCGCCTCGCGCAGGCGGACTG  
AGAGTACCCGGAGAAAAAGCATCGGCTAACTCCGTG

>2288 len=156 tot-seq=5

TGAGGAATATTGGTCAATGGACGAGAGCCTGAACCAGCCAAGTCGCGTGAAGGAAGACTG  
CCCGCAAGGTTGTAAACTTCTTTTGTATGGGATTAAGTCACCTACGTGTAGGTGTTTG  
CAGTTACCACATGAATAAGGACCGGCTAATTCCGTG

>2289 len=156 tot-seq=5

TGAGGAATATTGGTCAATGGGCGCAAGCCTGAACCAGCCAAGTCGCGTGAGGGATGACGG  
TCCTATGGATTGTAAACCTCTTTTGTGCGGGGAGCAAGGCCCGCCACGTGTGGCGGGAAGG  
AGAGTACCCGAAGAAAAAGCATCGGCTAACTCCGTG

>2290 len=158 tot-seq=5

TGAGGAATTTTCCGCAATGGGCGCAAGCCTGACGGAGCGACGCCGCGTGAGGGATGAAGG  
TTTTCGGATCGTAAACCTCTTTTATTAAGGAAAAAGGTCCGTATGCCAACCATGCGGGCT  
TGATGGTACTTATTGAATAAGCCCCGGCTAACTACGTG

>2291 len=159 tot-seq=5

TGGGGAATCTTGCGCAATGGACGAAAGTCTGACGCAGCGACGCCGCGTGGGTGATGAAGG  
CCTTCGGGTTGTAAAGCCCTGTGGGGAGAGACGAATAAGTGCGGGCTAATACTCCGCATG  
ATGACGGTATCTCCTTAGCAAGCACCGGCTAACTCTGTG

>2292 len=159 tot-seq=5

TGGGGAATATTGCGCAATGGGGGAAAGCCTGATCCAGCAATTCCGCATGTGTGAAGAAGG  
CCTTCGGGTTGTAAAGCACTTTAGGTTGGGAAGAAAAAGCTTCGGCGAATATCCGGAGTG  
TTGACGGTACCAACAGAATAAGCACCGGCTAACTCTGTG

>2293 len=159 tot-seq=5

TGGGGAATATTGGACAATGGGCGAAAGTCTGATGGAGCAATACCACGTGAACGATGAAGG  
TCTTCTGATTGTAAAGTTCTTTATTTAGGAAAAAAGCGCGCTAGGAAATGAGCGCGCC  
TTGATGGTACTAATTGAATAAGTGACAGCTAACTATGTG

>2294 len=159 tot-seq=5

TAGGGAATCTTGCGCAATGGGCGAAAGCCTGACGCAGCGACGCCGCGTGAGTGATGAAGG  
CCCTCGGGTTGTAAAGCTCTGTGGGGAGAGAAGAATAAGCACGAGTTAATACCTCGCGTG  
ATGACGGTATCTCCTTAGCAAGCACCGGCTAACTCTGTG

>2295 len=160 tot-seq=5

ATGGGGACAGTCACAATTGTCCTTCAAGCTGAGACTCTCAGATTCCCACACAGAAGGAG  
AGGAAGAAAAGTCTTCTCAGGATGAACAGATGTTCTGTCCACATGAGGAGGAGGTGGTA  
GACGGTGCCAGAACCCTTCCCAGGCTCTTCCCAGGTCAC

>2296 len=160 tot-seq=5

TGGGGAATTTTGGACAATGGGGGGAACCCTGGTCCAGCCATCCCGCGTGTGCGATGAAGG  
CCTTCGGGTCGTAAAGCACTTTTGGCAGGAAAGAAACGTCATGGGCTAATACCCCGTGAA  
ACTGACGGTACCTGCAGAATAAGCACCGGCTAACTACGTG

>2297 len=160 tot-seq=5

TAGGGAATCTCCACAATGGGCGAAAGCCTGATGGAGCAACGCCGCGTGTGTGATGAAGG  
CTTTCGGGTCGTAAAGCACTGTTGTATGGGAAGAAAAGTTAAGGTAGGGAATGACCTTAG  
CCTGACGGTACCATAACCAGAAAGGGACGGCTAAATACGTG

>2298 len=160 tot-seq=5

TAGGGAGTTTTCGGCAATGGGCGAAAGCCTGACCGAGCAACGCCGCGTGAGTGATGAAGG  
TCTTCGGATTGTAAAGCTCTGTTACGAGGGACGAATTACTGGGTCAGGAAATGGGCCCGG  
CTTGACGGTACCTCGCCAGAAAGTGACGGCTAACTACGTG

>2299 len=160 tot-seq=5

TGGGGAATATTGGACAATGGGCGAAAGCCTGATCCAGCCATGTCGCGTGTGTGAAGAAGG  
TCTTCGGATTGTAAAGCACTTTAAGTTGGGAGGAAGGGTTGTACGCTAATACCGTGCAAT  
TTGACGTTACCAACAGAATAAGCACCGGCTAACTCTGTG

>2300 len=160 tot-seq=5

TCGGGAATTTTGCACAATGGCCGAAAGGCTGATGCAGCAACGCCGCGTGGGGGAAGAAGG

CCTTCGGGTTGTAAACCCCTGTTGACCGGGAAGAACGGCCTTATCAGGAAATGGGTAGGG  
TTTGACGGTACCGGTAGAGGAAGCCCCGGCTAACTACGTG

>2301 len=160 tot-seq=5

TGGGGAATATTGCACAATGGGGGAAACCCTGATGCAGCCATGCCGCGTGTATGAAGAAGG  
CCTTCGGGTTGTAAAGTACTTTTCAGTTGTGAGGAAGGCGTTGAAGTTAATAGCTTCAGCG  
TTTGACGTTAGCAACAGAAGAAGCACCGGCTAACTCCGTG

>2302 len=160 tot-seq=5

TAGGGAATCTTCCACAATGGATGAAAGTCTGATGGAGCAACGCCGCGTGAGTGAGGAAGG  
TTTTCGGATCGTAAAGCTCTGTTGTTGGTGAAGAAGGATAGAGGTAGTAACTGACCTTTG  
TTTGACGGTAATCAATTAGAAAAGTCACGGCTAACTACGTG

>2303 len=160 tot-seq=5

TGGGGAATATTGCACAATGGGGGAAACCCTGATGCAGCCATGCCGCGTGTGTGAAGAAGG  
CCTTCGGGTTGTAAAGCACTTTTCAGTAGGGAGGAAAGGTTGTAAGTTAATACCTTGCAGC  
TGTGACGTTACCTACAGAAGAAGGACCGGCTAACTCCGTG

>2304 len=160 tot-seq=5

TGGGGAATTTTGGACAATGGGCGAAAGCCTGATCCAGCCATTCCGCGTGAGTGAAGAAGG  
CCTTCGGGTTGTAAAGCTCTTTCGCAAGGGAAGAAAATTATATTCTAATAAAGTATGAG  
GATGACGGTACCTTGATAAGAAGCACCGGCTAACTACGTG

>2305 len=160 tot-seq=5

TAGGGAATCTTCGGCAATGGACGGAAGTCTGACCGAGCAACGCCGCGTGAGTGAAGAAGG  
TTTTCGGGTTGTAAAGTACTTTTCAGCGGGGAGGAAGGGAGTAAAGTTAATACCTTTGCTC  
ATTGACGTTACCCGCAGAAGAAGCACCGGCTAACTCCGTG

>2306 len=160 tot-seq=5

TAGGGAATATTCCACAATGAGCGAAAGCTTGATGGAGCGACACAGCGTGACGATGAAGG  
TCTTCGGGTTGTAAAGTACTTTTCAGCGGGGAGGAAGGGAGTAAAGTTAATACCTTTACTC  
ATTGACGTTACCCGCAGAAGAAGCACCGGCTAACTCCGTG

>2307 len=160 tot-seq=5

TAGGGAATCTTCCACAATGGGCGCGAGCCTGATGGAGCAACACCACGTGAGTGAAGAAGG  
GTTTCGGCTCGTAAAGCTCTGTTGGTAGTGAAGAAAGATAGAGGTAGTAACTGGCCTTTA

TTTGACGGTAATTACTIONTAGAAAGTCACGGCTAACTACGTG

>2308 len=160 tot-seq=5

TAGGGAATCTTCCACAATGGACGCAAGTCTGATGGAGCAACGCCGCGTGTGTGAAGAAGG

TCTTCGGATTGTAAAGCACTTTAAGTTGGGAGGAAGGGCAGTTACCTAATACGTGATTGT

TTTGACGTTACCGACAGAATAAGCACCGGCTAACTCTGTG

>2309 len=160 tot-seq=5

TGGGGAATATTGCACAATGGGCGCAACCCTGATCCAGCCATGCCGCGTGCGGGATGAAGG

CCTTCGGGTTGTAAACCGCTTTTGTGACAGACGAAAAGGGATGTACGAATAATACGTTC

GCTGACGGTATCTGAAGAACAAGCACCGGCTAACTACGTG

>2310 len=160 tot-seq=5

TGGGGAATATTGCACAATGGGCGCAAGCCTGATGCAGCGACGCCGCGTGTGTGAAGAAGG

TCTTCGGATTGTAAAGCACTTTAAGTTGGGAGGAAGGGCAGTTACCTAATACGTGATTGT

TTTGACGTTACCGACAGAATAAGCACCGGCTAACTCTGTG

>2311 len=160 tot-seq=5

TAGGGAATTTTCGGCAATGGGGGGAACCCTGACCGAGCAACGCCGCGTGAAGGAAGAAGG

TATTCGTATCGTAACTTCTGTCATAGAGGAAGAACGGCAATAGTAGGGAATGACTATTG

AGTGACGGTACTCTAAGAGGAAGCCACGGCTAACTACGTG

>2312 len=160 tot-seq=5

TAGGGAATTTTCGGCAATGGGGGAAACCCTGACCGAGCAACGCCGCGTGAGTGATGAAGG

CCCTAGGGTCGTAAAGCTCTGTTGTAAGGGAAGAATACTTAGGAGAGGGAATGCTCTTAA

GCTGACGGTACCTTACCAGAAAGTGACGGCTAACTACGTG

>2313 len=160 tot-seq=5

TGGGGAATATTGCACAATAGGCGCAAGCCTGATCCAGCCATGCCGCGTGTGTGAAGAAGG

TCTTCGGATTGTAAAGCACTTTAAGTTGGGAGGAAGGGCTCTTGGCTAATACCCGAGGGT

TTTGACGTTACCAACAGAATAAGCACCGGCTAACTACGTG

>2314 len=160 tot-seq=5

TGGGGAATATTGCACAATGGGCGCAAGCCTGATGCAGCGACGCCGCGTGAATGAAGAAGG

CCTTCGGGTCGTAAAATTCTGTTGTCAGAGAAGAACGTGCGTGAGAGTAACTGTTACGT

ATTGACGGTATCTGACCAGAAAGCCACGGCTAACTACGTG

>2315 len=160 tot-seq=5

TGGGGAATATTGCGCAATGGGGGAAACCCTGACGCAGCGACGCCGCGTGCGGGATGAAGG  
CCTTCGGGTTGTAAAATTCTGTTGTCAGAGAAGAACGTGCGTGAGAGTAACTGTTACGT  
ATTGACGGTATCTGACCAGAAAGCCACGGCTAACTACGTG

>2316 len=160 tot-seq=5

TGGGGAATTTTGGACAATGGGCGAAAGCCTGATCCAGCAATGCCGCGTGTGTGAAGAAGG  
TTTTCGGATCGTAAAGCTCTGTTGTTGGTGAAGAAGGATAGAGGTAGTAACTGGCCTTTA  
TTTGACGGTAATCAACCAGAAAGTCACGGCTAACTACGTG

>2317 len=160 tot-seq=5

CTAAGAATATTCCGCAATGGACGGAAGTCTGACGGAGCGACGCCGCGTGGATGAAGAAGG  
CTGAAAAGTTGTAAAATCCTTTTGTGATGAAGAATAAGGGTGAGAGGGAATGCTCATCT  
GATGACGGTAATCGACGAATAAGCCCCGGCTAATTACGTG

>2318 len=160 tot-seq=5

TAGGGAATCTTCCACAATGGGCGAAAGCCTGATGGAGCAATACCGCGTGAGTGAAGAAGG  
TCTTCGGATCGTAAAGCTCTGTTGTTAGAGAAGAACAAGAGGTGTAGTAACTGGCACCTC  
CTTGACGGTATCTAACCAGAAAGTCACGGCTAACTACGTG

>2319 len=160 tot-seq=5

TAGGGAATCTTCGGGAATGGGGGCAACCCTGACGCAGCCATGCCGCGTGAATGAAGAAGG  
CCTTCGGGTTGTAAAGTTCTTTTCGGTAGCGAGGAAGGCATCTAGTTTAATAGACTAGGTG  
ATTGACGTTAACTACAGAAGAAGCACCGGCTAACTCCGTG

>2320 len=160 tot-seq=5

TAGGGAATTTTCGGCAATGGGGGAAACCCTGACCGAGCAATGCCGCGTGAATGATGAAAT  
TCTTCGGAATGTAAAATTCTGTTGTGAGGGAAGAAAGGTAGTATCAGGAAATGGGTATTA  
CTTGACGGTACCTTACTAGAAAGCCCCGGCTAACTATGTG

>2321 len=160 tot-seq=5

TGGGGAATCTTCCGCAATGGGCGCAAGCCTGACGGAGCAACGCCGCGTGAGTGAAGAAGG  
TTTTCGGATCGTAAAGCTCTGTTGAGAGGGACGAGAGATATAATCAGGAAATGGGTTATA  
GAGGACGGTACCTTTGAGGAAGCCACGGCTAACTACGTG

>2322 len=160 tot-seq=5



TCGAGGATCTTTGCAATGGGCGCAAGCCTGACGGAGCGACGCTGTGTGAGTGATGAAGG  
CCTTCGGGTTGTAAAGCTCTTTTGTGGGAACAAGAAAGATTCGTGAATAACGAGTCAA  
TTTGAGGGTACCAGAAGAAAAGTACCGGCTAACTACGTG

>2323 len=160 tot-seq=5

TGGGGAATATTGCGCAATGGGGGAAACCCTGACCGAGCAACGCCGCGTGAGTGAAGAAGG  
TTTTCGGATCGTAAACTCTGTTGTTAGAGAAGAACAAGGACGTTAGTAACTGAACGTCC  
CCTGACGGTATCTAACCAGAAAGCCACGGCTAACTACGTG

>2324 len=160 tot-seq=5

TCGAGAATCTTTTGAATGGGCGCAAGCCTGACGAAGCGACTCTGTGTGAGCGATGAAGG  
CCTTTGGGTTGTAAAGCTCTTTTCGGTTAGGAACAAGAGAGGTGAGTGAATAACTGCCAA  
TTTGAGCGTACTAGCTAAAGAAGCACCGGCTAACTCCGTG

>2325 len=160 tot-seq=5

TGGGGAATTTTGGACAATGGGCGCAAGCCTGATCCAGCCATGCCGCGTGCGGGAAGAAGG  
CCTTCGGGTTGTAAACCGCTTTTGTGAGGGAAGAAACGCTCTGGGCTAATACCCTGGGGT  
AATGACGGTACCTGAAGAATAAGCACCGGCTAACTACGTG

>2326 len=160 tot-seq=5

TAGGGAATCTCCGCAATGGACGCAAGTCTGACGGAGCAACGCCGCGTGAGTGATGAAGG  
TTCTCGGATCGTAAAGCTCTGTTGCCCTAGACGAAAAGCAAGGAGAGTAACTGCTCTTTG  
TGTGACGGTATAGGAGAAGAAAGCCCCGGCTAACTACGTG

>2327 len=161 tot-seq=5

TGGGGAATCCTCCGCAATGGGCGCAAGCCTGACGGAGCAACGCCGCGTGAGTGAAGAAGG  
GTTTCGACTCGTAAAGCTCTGTTGTGCGGGACGAATGTGGAGTTGTGAATAACAGCTTC  
CAATGACGGTACCTGACGAGGAAGCCACGGCTAACTACGTG

>2328 len=161 tot-seq=5

TTAGGAATATTCGTCAATGGGGGAAACCCTGAACGAGCAATGCCGCGTGAGTGATGAAGG  
TCTTATAGATCGTAAACTCTGTTGTAGAGAGAGAACAATTATTATAGGAAATGATAATA  
AGCTGACGGTACTCTACCAGAAAGCCCCGGCTAACTACGTG

>2329 len=161 tot-seq=5

TGGGGAATATTGCACAATGGGCGCAAGCCTGATGCAGCAACGCCGCGTGAACGATGAAGG

TCTTCGGATCGTAAAGTTCTGTTGTTAAGGAAGAACGAGTGTGAGAATGGAAAGTTCATG  
CTGTGACGGTACTTAACCAGAAAGGGACGGCTAACTACGTG

>2330 len=161 tot-seq=5

TGGGGAATATTGCACAATGGGCGAAAGCCTGATGCAGCGACGCCGCGTGAGCGAAGAAGT  
ATTCGGTATGTAAAGCTCTGTTATACGGGACGAACGGCAAGGTGGTAAATAGCCATCAT  
GAGTGACGGTACCGTAAGAGAAAGCCACGGCTAACTACGTG

>2331 len=161 tot-seq=5

TGGGGAATTTTGCACAATGGGGGAAACCCTGATGCAGCGACGCCGCGTGAGTGAAGACGG  
CCTTCGGGTTGTAAACTCTGTTATACGGGACGAATGTAGGCATGGTTAATACCCATGCG  
TAGTGACGGTACCGTAAGAGAAAGCCACGGCTAACTACGTG

>2332 len=161 tot-seq=5

TGGGGAATATTGCGCAATGGGGGAAACCCTGACGCAGCGACGCCGCGTGCGGGATGAAGG  
CCTTCGGGTTGTAAACTCTGTTGGTAGAGAAGAACGTTGGTGAGAGTGGAAAGCTCATC  
AAGTGACGGTAACTACCCAGAAAGGGACGGCTAACTACGTG

>2333 len=161 tot-seq=5

TGGGGGATATTGCGCAATGGGGGAAACCCTGACGGAGCAACGCCGCGTGAACGATGACGG  
CCTTCGGGTTGTAAAGTTCTGTTATACGGGACGAATGGCGTAGCGGTCAATACCCGTTAC  
GAGTGACGGTACCGTAAGAGAAAGCCACGGCTAACTACGTG

>2334 len=161 tot-seq=5

TGGGGAATCTTCCGCAATGGACGAAAGTCTGACGGAGCAACGCCGCGTGAGTGAAGAAGG  
GTTTCGACTCGTAAAGCTCTGTTGTCGGGGACGAACGTGGAGACGGCAAATAGTCGTTTC  
CAATGACGGTACCTGACGAGGAAGCCACGGCTAACTACGTG

>2335 len=161 tot-seq=5

TGGGGAATCTTCCGCAATGGGCGAAAGCCTGACGGAGCAATGCCGCGTGAATGAAGAAGG  
CCTTCGGGTCGTAAATTCTGTCCTTATTGAAGAGAGGTTTCATGTGTAACAATGCATGA  
ATAGGACGGTAGATAAGGAGGAAGCCCCGGCTAACTACGTG

>2336 len=161 tot-seq=5

CAAGTGATGCAGAGACAGACAGAAAAGTGAGGTTGAGGTATTCTTTGCCCTGGTTCCTCC  
TTTTTCTCTGGCTGAAGGTCACAGTTCCTGTCAGGTCTCACAGGTGTCCTCTCCATACAA

CATGACTCTCTGTGGCCACTCCCTCCATTGCCCTACAGGC

>2337 len=161 tot-seq=5

TGGGGAATATTGCGCAATGGGGGAAACCCTGACGCAGCGACGCCGCGTGCGGGATGAAGG  
TTTTCGGATCGTAAAGCTCTGTTGTTAAGGAAGAACGAGTGTGAGAGTGGAAAGTTCATG  
CTGTGACGGTACTTAACCAGAAAGGGGCGGCTAACTACGTG

>2338 len=161 tot-seq=5

TAGGGAATTTTCCACAATGGGCGAAAGCCTGATGGAGCAACGCCGCGTGAACGATGAAGG  
CCTTCGGGTTGTAAAGTTCTGTTGTTAGGGACGAACAAGTGCCGTTCAATAGGGCGGCA  
CCCTGACGGTACCTAACGAGGAAGCCACGGCTAACTACGTG

>2339 len=161 tot-seq=5

TAGGGAATCTTCCGCAATGGGCGAAAGCCTGACGGAGCAACGCCGCGTGAGTGATGAAGG  
TCTTCGGATCGTAAACTCTGTTGTAAGAGAAGAACGTGTGTGAGAGTGGAAAGTTCACA  
CAGTGACGGTAACTTACCAGAAAGGGACGGCTAACTACGTG

>2340 len=161 tot-seq=5

TAGGGAATCTTCCGCAATGGACGCAAGTCTGACGGAGCAACGCCGCGTGAACGAAGAAGG  
TCTTCGGATCGTAAAGTTCTGTTGTTAGGGAAGAACACGTGCCATTCAATAGGATGGCA  
CCTTGACGGTACCTAACTAGAAAGCCCCGGCTAACTACGTG

>2341 len=161 tot-seq=5

TGGGGAATTGTTGCAATGGGCGCAGGCCTGACGACGCAACGCCGCGTGGAGGATGAAGG  
TCTTCGGATTGTAAACTCCTGTTGACCGGGAAGAATGGACCTCGCATTAAACACCGTGAGG  
TAATGACGGTACCGGTTGAGGAAGCCACGGCTAACTCTGTG

>2342 len=166 tot-seq=5

GGGCTAGCACAGGCCAGCCTGCTCAGCTGTGGGTGTTCTGCAGCGAACCTGCTGTGCCTG  
TGTCACATACCAAGGGCATGACTAAGGGCTACTGATGCAGAGTCAGAAGTGGCCCAGCCC  
TGGCCCCTATCTCTCCAGGCTCCTCTGAGCCTCAGCAGAGACTG

>2343 len=166 tot-seq=5

CTAAGAATATTCCGCAATGGGGGAAACCCTGACGGAGCGACGCCGCGTGGATGATGAAGG  
CCGGAAGGTTGTAAAGTCCTTTTGGGCGCAAAGAATAAGTACGCGAGGAAATGCGCGTGC  
GGTGACGGTAGCGCCTGAATAAGCAACGGCTAATTACGTGACAGCA

>2344 len=167 tot-seq=5

GCAGGCTGACAGGAAGTAAATTTTATTATCAAGACATGCATTCTACCCTCTGGCCTCACC  
TGTCTCCTCTGTCTCCACCTTGCCCCATCCTCACCCCCAGGGGAAAGAAAAGAAGTCAA  
CAAAGCAGGCTTTTCCTGCTAGCTCTCCATGGCATGTGGCCAAGACA

>2345 len=169 tot-seq=5

AGAGAAGGGTTTGGGAGCCAGTGCTGTGTATGCGCCCCTAGTCCTGCCACCTCCCTAAAG  
CTTGTGCACTCAGGTGTGAAGGCAGGTGCTGTAGGGTGGGGAGGAGCCCACCTGTCTACA  
CAGGCTCACCTGTGCTTCTCCAACCGGTGGAGGCATTTATCCCTGTTTC

>2346 len=169 tot-seq=5

AAAGAAAGGGCAGGGCTTCCCTGGGCAGCACTTGGTGGGGGCCAGGGCACCAGGGCCCCC  
TCTGACCAGCGAAGCCCCGAGGACCCCAGCTTGGTGCAGGAAGAGGACCCAGTGCTTCAG  
TTTGCCGGTATAAAAAACTCACACCCATGCTTCTCACCTGAATACATA

>2347 len=171 tot-seq=5

ACAATGTCAAATACAGACTCAGGAGAGACTCTCTGAGAAGGGGACACAGGAGCAAAGGTC  
TAAGCCAGGGAATGGAGGGGCCCTGAGGGTGTCTGGGGCAGAGACAAGCTTAGGGGTTGA  
GATTTAGGTTTAGCCAGGAGTGGGAGCCTTGGGGGAGGACCAGGTAGTGC

>2348 len=171 tot-seq=5

AGGGGCTCAGCAGGGAGCTCTGGCAGGGTAGTTGGGAGCCCTGAGTCTCATCCAGGCTCT  
GTTGCTTGGCTGTGTGATCTGGGCTAATTGCTTGCCCTTTCTGGGTCTGACCTTCTCCAT  
CTACAAAATGAGGTGTATTCAATTGGATCATTTCTGGGGTTCTTTCCAGCT

>2349 len=173 tot-seq=5

AACTTAGGAAATTAGTCTGAACAGGTGAGAGGGTGCGCCAGAGAACCGGACAGCTTCTGG  
GACGGGCGGAAGCACAGAGCCGCTGAGGCAGCAGCCTGGGCGGGCCGCAGATAACCGGCC  
ACCATCCGGACCAGAGGACAGGTGTCCGCTGGCTTGGGAGGCGACCTCAGCC

>2350 len=173 tot-seq=5

ACAACCCTCTCATAAGATGGGGTGTCTGGAGTAAATGATAGTTCATCCATGTTGTTT  
ATGTTTCTAACAATTAGAAATTTTCAACTTAGAACTCAGCATACAAAGCCAACCTTAATC  
AGATCAGTGACAGCCAGTGAAGACAGCAAGCTGTATGTTTTTCAGACAAGTAGG

>2351 len=176 tot-seq=5

CGACTTGGCTGCAGACTCAGAGAATGGCTTTGCTATTCGGCAGCCATAATCTGCCTCACA  
CTGCAAAGCAGCCATTGCCCTCATTCTCTGAATTCAGGGGTAGCCTAAAGTCTTCTTAA  
ATTGTAAACACATCCTGGTTGGCAACCTTCGGAAACTCTGAGCCTTCTGCCCTTC

>2352 len=179 tot-seq=5

TCTCTACGGGAGGCAGCAGTGGGGAATCTCCGCAATGGGCGAAAGCCTGACGGAGCAAT  
GCCGCGTGAGTGAAGAAGGGTTTCGGCTCGTAAACTCTGTTGTTGAAGAAGAACGTGCG  
TGAGAGTAACTGTTACGCAGTGACGGTATTCAACCAGAAAGTCACGGCTAACTACGTG

>2353 len=179 tot-seq=5

GAACTAGTTACTCTAGATTAACCTGAATGGCTTCTCAATACAAGAGCAACCAATGTCCT  
GGGCATCCTCCCAAGTTTTTGTGAGTCTTCCCACTGAATAGAACTGGTCACAAGGTGAG  
CATTTGCTGTCTCTCCTTGACATTCTAGTCTGATTCCTTGAATGTGCTACCTCAGTC

>2354 len=179 tot-seq=5

TGGGGAATATTGCGCAATGGGGGAAACCCTGACGCAGCGACGCCGCGTGCAGGATGAAGG  
CCCTCGGGTCGTAAACTGCTTTTATTAGAGAAGAATATGACGGTAACTAATGAATAAGGG  
ACGGCTAACTACGTGCCAGCAGCGCGTAATGCACAGATCGGAAGAGCGTCGTGTAGGG

>2355 len=180 tot-seq=5

TGAGGAATATTGGTCAATGGGCGGAAGCCTGAACCAGCCAAGTAGCGTGCAGGAAGACGG  
CCCTCCGGTTGTAAACTGCTTTTAGTTGGGAATAAAACGGGGCTCGTGAGCCCCCTTGC  
ATGTACCATCAGAAAAAGGACCGGCTAATTCGTGCCAGAGCCGCGTAATCTACAGATC

>2356 len=182 tot-seq=5

GAGGCCAGGGAAGGAGGCAGGGAGACTTCAGGAAAGGTCTGCGGTGCTGTGTGAGGATTT  
TCTCTGGACCACCAACTTTTCAAGGTGTTGATAGTGATGGCGGGTAGTAGCTGCTGGCTT  
GGCAGGGCAATGCTGTA ACTCCAGGCACTGTGGGGAGGGGGCCTCCATGCAGGAGGATGA  
CA

>2357 len=182 tot-seq=5

AGGCAGTGATTTAAAAATGGCTTTCCAGAGACCCAGCCGCGCTCCCTGCCCTTGAGGCGG  
AGGCTGGAGGTCGCGAGTCGGTGGAGCCCCGCTCGGTGCTGCGGAGACTGCAGTGCGGC  
TGGGACCCGGAGCCGTGGGCGAGGCCGCGCGAAGA ACTAAGGGAGGACTCAGGCGACAA

CT

>2358 len=183 tot-seq=5

TCGGGAATTTTGCTCAATGGGCGCAAGCCTGAAGCAGCAACGCCGCGTGAGGGATGAAGG  
CCTTCGGGTTGTAAACCTCTTTTATCAGGGACGATTATGACGGTACCTGATGAATAAGCC  
ACGGCTAACTACGTGCCAGCCAGCCGCGGTAATTACAAGATCGGAAGAGCGTCGTGTCGG  
GAA

>2359 len=183 tot-seq=5

CAAGCAGAAGACGGCATAACGAGATAAGCTAGTGCGGGAGGCAGCAGCAGTGTCTAGAAT  
ACTATGTGTGTTATAAACACTCAGAACCCAGCAGCAGTGTCTGGAATCCTATATGAGGG  
ACACACCCTCAGAACCCAGCAGCAGTATTCTAGAATCCTTTGTGAGGGACAAGCACTCAG  
AAC

>2360 len=183 tot-seq=5

GCAGAGACAAGATGGAGTAGAAAAGAGCAGGAGAGAGAGGGGGCAGGGAGAGAGACAGAG  
AGAAGCCTAGGAGTCAGATACAGTCAGGGACAAAAGCGGAGAGAACAGAATCAACTGCAC  
ACAGGTAGACACGGGGGTGGGGATACATAGATTGGAATGTGGGGGTGGGGAGCACCAGGG  
AGC

>2361 len=184 tot-seq=5

ACTGATTTTGTCTTGATAGTCTGGGTCAATCACCTAGCCAACACTGTAACTCCCTTCTT  
AGCCCACTGACTTAACTTAGGAGGAGCCCGAGGTGTCCAGGTGGCAATCTTAACTTCTA  
GTTTAAATGGAATCATTGTGTCCCCTGGTGGCAGCGTTTCTCCCTCTGGAACCTAAGACTTC  
TAGA

>2362 len=189 tot-seq=5

CTTGGTCATTGGGCAAGGCTTGCAACTGTGTGGGTGGTGGCCTCACCGCCCCACTGCCC  
TGGAAAGGAGAGCAGACTCCTTGCCGTCCCCCTCAGGGAACCTGGAGAGATCAGCTTGGC  
TCTTGGCTTTAGCCATGAGAGAGAAACAGGGTATGGGGTTCACACGATTCCTGAGCATC  
TCTGGTGGG

>2363 len=190 tot-seq=5

TGGCAGCAGAGGACTGGCTGGGCGAGGAGTTCTCAGGCCCTAAGCAGCATATGTGAGGT  
CCACAATGGTAGAGTAGCAGTGGCAGGCCAGTATTTAGGCTGTCAAAGTCAAGTGAGGG  
TGCCAATGGTGGTGGCAGCGGGCTGAGAAGGTTAGTCCCCATGTCTCCATGTGGCATATG

TGAGTATATG

>2364 len=190 tot-seq=5

CCAACCGTGACTGGAGTTCAGACGTGTGCTCTCCGATCTCCTACGGGAGGAGCAGTGGGG  
AATATTGCACAATGGGCGCAAGCCGGATGCAGCGACGCCGCGTGAGCGAAGAAGTATTC  
GGTAGGTAAAGCTCTATCAGCAGGGAAGAAAATGACGGTACCTGACTAAGAAGCTCCGGC  
TAAATACGTG

>2365 len=190 tot-seq=5

CAAGCAGAAGACGGCATAACGAGATCCGTAGGTGACTGGAGTTCAGACGTCTGCTCTTCCG  
ATCTCTACGGGAGGCAACAGCAGCGCCAGGCCTGGGGGGAAGAGAGAACAGCTGTTGAG  
TTTGGCTGCCTCTCCTGCTGTCAGGGTCACTGTCAAAAATATTTAACAACCAAGTGAACT  
GGGAACTGGC

>2366 len=191 tot-seq=5

AGAAGTGGAAGGGGACAGTGACCATATCCCAATGTCACAGAGTACATGCAAGAAACAATG  
TACAGCCATTTTTTATGCCATTCTTATTTCTCCTGATAATACAGCCTGCTCCAGGCAC  
AGCAGGGATGCTCAACCAAGTCCCTCCAGAATTTTCAAGTGAGAGACAGGGAGGACGC  
TTCCTCTTTGG

>2367 len=191 tot-seq=5

AGCGGGAGATATGAAGCTGGAGCGAAAGAATCAGCTGGAATCAGATGAACGCATGGGAAG  
CAGTCGCCATGCACAGCAATCCCGTGACGCTCCCGTCAGTGGAAGCAGAAAGAAAAAGCA  
GACTGCAAAGTTCCGTACACAGGAACAAAGCGCCGGAGAGGGAAAGCTTCTTGAGAAGGA  
ACGGCACCTCT

>2368 len=191 tot-seq=5

GTGGATAGAAGCGTAAACCTTGAGGTGAGGTAGAGCTGGCTTTGAGCCCCAGATCTGGCA  
CATTCTAGCTGTGACTCCCTGCTGTGCTGGGGCCTCAGTGTTCCCATCTGTAAGATGGG  
CTGTTACTGGTACCTGTTTCTGAGTTATGTGAGCAGGAGCCTACATGTAAAGAGCCTGC  
CACATGATCAG

>2369 len=192 tot-seq=5

GTGGGAGGTCCCCTCCAGAACAGTATGTGGTTCCAAACTCCTGAGGGAGGCGGGACAGAC  
CCCAAGGAAGTAGATGAGAACCTGAGTGAGGCTCTGTGGGGAGAGAGGATGTTCTCAGC

CCTCATGAGGACGTGTCAGTTTTACTTGAGATTAGGCCCTGGCCTGGCTGGGCAGCCTG  
CCAGGTAGGTTC

>2370 len=193 tot-seq=5

GAAACTGGGGGCGCGCACAAAACAACCTCCCTAGTCTGTATTTCTCTCCTCCTTTGGA  
CCCATGCCTTCTTATTCTCCTGAGACAAGCGGATCTTTCTGTGTTTCAGAGTTTTATTAC  
AAGGGAACGTTGATGTAATTAGCAGTGTGTTTAGGGTGATCTTTACTGATCTGTATCACA  
AAGCCTTCTTACC

>2371 len=194 tot-seq=5

G TTCAGACGTGTGCTCTTCCGTCTCTTACGGGAGGCAGCAGGGCAAGCTGCAGCAGAGAG  
CACGCAGACACAGCTAGGTGAACAGTGGGCTCATCTCTGGAGTGCCTGCCTGCCACAAGG  
CAGAGGGCTGGCTGGGAATGGCGGTTGTA CTACCACAACAGGGGAACACAGAACAGGCC  
AGGCAGTGT CAGGG

>2372 len=195 tot-seq=5

TAGGGAATCTTCCACAATGGACGAAAGTCTGATGGAGCAATACCATGTGAACGATGAAGG  
TCTTTTTGATTGTAAAGTTCTTTATGAGGGATAACA ACTGATAGTACCTCATGAATAAG  
TGACAGCAA CTATGTGCCAGCAGCCCGCGTAATAAGCAGATCGGAAGAGCGTCGTGTA  
GGGAAAGAGGGGAGA

>2373 len=195 tot-seq=5

GTAAGAGGCCCTGCCCTGAGCACTTCCCTCCCCGTGTCGCCCTGCCAGCCCCTTG  
ATCAGACGATGGCAATGGAGGGAGGCCTCTGCATCTGGAATCTTCCAGCCCTCCTGCTCC  
CTTGCTGGGTATTTGTCTTGCTGCCTTACCTGGGCTTTTTTAAAACAGATTTTCT  
TTCCTTGCTTCTC

>2374 len=196 tot-seq=5

GACGTTGCTCTTCCGATCTTCTACGGGAGGCAGCAGTAGGGAATCTTCCACAATGGACGC  
AAGTCTGATGGAGCAACGCCGCTGAGTGAAGAAGGGTTTCGGCTCGTAAAGCTCTGTTA  
TAAGGGAAGAACATTTGCAATAGGAAATGATTGCAGACTGACGGTACCTTGT CAGAAAGC  
GATGGCTAACTATGTG

>2375 len=197 tot-seq=5

TAGGGAATCTTCCACAATGGACGAAAGTCTGATGGAGCAACGCCGCTGAGTGAAGAAGT



ATTCGGTATGTAAAGCTCTATCAGCAGGGAAGAAATAGCGACCTTTGGGTCGCCAGACG  
GTACCTGATTAAGAAGCCCCGGCTAACTACGTGCCAGCAGCCGCGTAATGAACAGATCGG  
AAGAGCGTCGTGTATAG

>2376 len=198 tot-seq=5

AGAAGTGTGATATTAAGATATAATAAGGGAGGAAGAAGTAGGGAATATTAATAAATGGAA  
GCAAGTCTGATGGAGCAAAGCCGAGTGAGTGAAGAAGGTTTTAGGATAGTAAAGATATGT  
TGTTGGTGAAGAAGGATAGAGGTAGTAAATGGAATTTATTTGACGGTAATCAACCAGAAA  
GTCACGGCTAACTACGTG

>2377 len=199 tot-seq=5

TGGGGAATATTGCACAATGGGCGCAAGCCTGATGCAGCAACGCCGCGTGAACGATGAAGG  
TCTTCGGATCGTAAACTCTGTTGTTAGAGAAGAACAGCGCATAGAGTAACTGTTATGCG  
TGTGACGGTATCTAACCAGAAAGCCACGGCTAACTACGTGCCAGCAGCCGCGTAAGATC  
GGAAGAGCGTCGTGTATGG

>2378 len=200 tot-seq=5

AATTCTTGTTGAGACAAGGAGATCATCATGTGGCCCTTTAAGAGCTTCACCAGATGGTGG  
GAGCCAGAGAATGAGCAGCATACAGGAAGGCTCAGCCAGCCCTATGGGGATGGAGCAGAG  
TGAACCAGAGTCACAGAGCAGAAAGCAGTCACCAAGGAGAGAAGGGCCACAAGCCCACAG  
CTGCAATAAATTAGCTTCTT

>2379 len=200 tot-seq=5

AATTTTCCATCAAATCTTCTTTATTAATAAAAAAAAAATAGATTCTTTTCAAATAGACAAG  
CTTGAAATTTTAAAAATAACAGTATTCATTAACAACCTCCACACTAACTGTGGTTACCA  
AACCTTGAGAATCTAAGTGCCAAATTCATGTGCTAGCATTACATGCTTTCTACTTTGA  
TTCCACAGTGGCTCCCACT

>2380 len=201 tot-seq=5

TGGTCTAATGGCATTACTCTATAGCCCAGACAGGCCTAACTTATCTAATCCTCCTGCC  
TCATCATTCTAAGTTGCTAGGATTATAGGAAGACGCCACCATGACTAATTTAGCCTTCTT  
GCTTTCTAGTTCATCTGACAGAAAATCCAGTGACTTCTAATGTGTTTACCCTCTGAGA  
AGGGTAGTCAGGTCTCCAATC

>2381 len=203 tot-seq=5

CTGGAGAAGGGAGAGCACACATGGGAAGACTCGGCTACGCTGTTTTGTTTTTGCTAAAAG  
TGCAAATGACTACTGAACAGCCATTGCACTAAGCAAAGTTTATCTGAGAACCATGTACC  
TCTCGTGTTCATTACAAGCGCTATACAGTTGATTGCATATCTCTAAGTAGCAGCATAGC  
ACATGGTGATACATGTGTCTTGT

>2382 len=204 tot-seq=5

AGAGGAGCCAAGCAGGAAGATGGGGCAGAAAAGGCTGCGCTTGCTCCGGGCCGGGGCAAG  
CATGCCAGAGAGCAGGCCTGATCCAGAATGGTCCCAGGATGGCCGCAAGTGGCCTCAGAC  
CCAGGGACACCACCGAGGTGGCAGTGCCTGAGGGCACCGGCTGGGGAGGGGGCTTGTCTT  
TCCGCTCCAGCATCCGCTGAAGGC

>2383 len=207 tot-seq=5

CCTTGCGCTTCAACTGCGACCAACAGGCAGAACAGAAGAAGAAGAGGCACAGCAGCA  
CCGGAGACAGCGCGGATGCAGGGCCGCTGCAGCGGGGAGCGCTCGTGGAGAGAAAGAGA  
TGGAGGGTGTGGCCCTCAAGCATGGTCCATCCCTCCCCAAGAGCGGAAGCAAGCCCCTT  
CCACCCGGAGGGACTCCGCTGAACCTT

>2384 len=207 tot-seq=5

TGAAGAGAATATTATAAAAATATTAAATAACATAAAGTTCTATGTTTCTTATGGAGGAAC  
CCACAAAACCTGATTTTTGTTTTGTTTTGTTTTTTTCTTGAGATGGAGTTTCACTCTTG  
TTGCCAGGCTGGAGTGCAATGGTGTGATCTTGGCTCATTGCAAGCTCTGCCTCCTGGGT  
TCACGCCCTTCTCCTGCCTCAGCCTCC

>2385 len=208 tot-seq=5

CCACATGCTTCGGAACGGGGCTGCCCCCAATGTCCCAGAGCTGAGAGAGAAGAGGATA  
GGGAGAAGGTGGCCTCAGGAGCAGGCAGACAACCTGAAAGCCATTGGGTTCTTAGCTTCCC  
TTCTGCAGTCTCCCCCACCTAAGGTCACAGCTCCTCCCCCTCCTACGTCTACAGTGC  
CTATCTCAGCTCCCTCTCCCCAGTCCT

>2386 len=208 tot-seq=5

TGGGGCATATTGGACAATGGGCGCAAGCCTGATCCAGCCATGCCGCGTGTGTGAAGAAGG  
CCTTATGGTTGTAAAGCACTTTAAGCGAGGAGGAGGCTACTGAAGTTAATACCTTCAGAT  
AGTGGACGTTACTCGCAGAATAAGCACCGGCTAACTCTGTGCCAGCAGCCGCGGTATCCT  
CAGATCGGAAGAGCGTCGTGTTGGGGAA

>2387 len=208 tot-seq=5

TGAATATTAGGGAAGGAACCACGAGTTCAGAGAAAAACAAATCAGTAAATCCACTTCCAC  
TTTTTTTCCCCAAACTGTTCGGTCACTCCAAGAGGTGAGGGGAGGCTTGCTTTTCCCCAC  
TGGTAGCATAATGAGTTTCCTAAGCCATACTCCACTCAGCAAGGCTGCCGGGCAACCGGC  
TCCCCAGCACACTGGAAGCAGCCCTTG

>2388 len=209 tot-seq=5

GGCACCTGAAGCGGCTGAACAGACCTTCTTCCACTGTCCCAGGAACCTCATGGCACTGA  
AGTGGACCCAGCCAGTTGGCACTGGGTTTGTGTGCAAGTGAGATGGAAGGTTACCAAGG  
AAAAAAAAAATGAAGTCAAGGGAATAAGAAAATCCCCAGGACTTCTACCCGACCCAATGC  
AATAAACGCGATAGAAACAAACCCTGGAG

>2389 len=209 tot-seq=5

ATGATGTAGAGGAAAAGTACCGCACAGGAAATGGGGCTCTGACTCCACGACTAACCAGCT  
ATGTGACCTGGGGCAAGGCACTTAAGCCTCAATCTCCTCATCCCTAAAATGAGGGGACTG  
AATTGGACCCTTTTCTAATCCCTTCCAGTTCCTACAATAATTTGTCATCATCCTTCCAC  
ACTTGGGCTCTTGGCCTCTAAGTCCATGT

>2390 len=210 tot-seq=5

TGACTGGAGTTCAGACGTGTGCTCTTCCGAGCGCCGACGGGAGGCAGCAGTAGGGAAGCG  
GCCACAAGGGACGCAAGGAGGATGGAGCAAAGAAGATGGAGTGAAGAAGGGTTTCGGAGA  
GGAAAGATCTGGGGGGGGTGAAGAAGGACAGGGGTAGTAAAGGACATTGGTTTGAAGGGA  
ATCAATTAGAAAGGCACGGCTAACTACGTG

>2391 len=212 tot-seq=5

TGGTACTGGAGTTCAGACGTGTGTCTTCCGATCTCCTACGGGAGGCAGCAATAGGGAAT  
CTTCCGCAATGGACGAAAGTCTGACGGAGCAACGCCGCGTGAGTGAAGAAGGGTTTCGGC  
TCGTAAACTCTGTTGTCAGGGAAGAACGCCGACGGGAGTAACTGCCCGTCGGGTGACGG  
TACCTGACCAGAAAGCCACGGCTAACTACGTG

>2392 len=214 tot-seq=5

AGAGTCTGAGAAACAGCAGAACTTTTGATAGCTCCGTGGACCAAAGGACAAAAGTCA  
TCAAAGTAAGGGTGAATAAGAAATAGTCTGAAAATGTATTTATATGTAGGATATATAAG  
AGCTACAAATCAATAAAGACAGCGAAATAGAAAGCAAAGACTTGAACAGTTACTTCACC

AAAGAGAATGTTCAAATGAGTAATATTACCCAA

>2393 len=217 tot-seq=5

CATCTGTATTTGTTACTCTTCAGTAAAATATTGACAAATAAACATAGCATCACATTTTAC  
AAATCAGAGCATCACTAGCATTCACTTCTGGGGTTTCCCCATCTTGTTCTTCAGCTGGA  
CACTGGACATCTCGAGTCTCCCTAGACAGCACAAGGTGTCCACCTTTTGCCCATCCTTGA  
TGTTCAGAATGGGCAAATGTGATGGTTTGCCAAGTTC

>2394 len=219 tot-seq=5

GGAGCAGGTGTGAGGTGAGGTGCCACGCCTTGAGAAACCCAGGGATCGGCACACTGTTC  
TCACGTAGCAGCCAGAGTATCTGCCACCATCCCCACACTACAGGAATCCAATGAGATCCC  
AGAGGGAGGGTGAGGGACCTTCCAGAGCCCAGCAGGTGGCAGCAGAGCCAGGACTCACCC  
AGACCCACCCTCAGTTTCAGTAGGTGGCCCTCTCCCCAC

>2395 len=223 tot-seq=5

GAAGGACGAGCTGTGCATCTCTGTGGGGCAGCCACATCTTTGCTCTGCTAGGGGGTACAG  
GTGCACGGGACCACATCCCTGTCCTTAGGAGAGGTGCACCCCCAGCGAGGAGGAGATGAG  
TCTTCAGGCTGCACAGCTCCTGGCCAGGCAGGGCAGCACATTCTGCCACCTGCATTTGT  
TACGGGCCCTCTGTGTGCCCGGCTCTGCTCTGAGCCCTGCGGA

>2396 len=225 tot-seq=5

GAACACAAGTTCAAGGTCACCCTCCGTGACACAGCAAGTTCCAAGACAGCTCGGTATATA  
TGAGAACCTGTTTTAAAAAATTGAAAATCCAGGAGAAGTCTTAGCATCCAGTTGTGATGC  
TAACTGGCGTTTCTAAAGATGCCCCCTAAGTTCTGGGTAAAGCAAGGAGAGCTCTGTT  
ATTCCCAACTGGCTACTGAAAGATCAAAAAAAGCCAGGAACTTT

>2397 len=225 tot-seq=5

CAGTCCACAGAAAAGGCTCCCGCTTGGGAGTAAGACACACAGGATGCTAAGTTCTGCCTC  
TGCCACCCTGGCAGCTCCCTGGCAGCGGACAAGTCTCGGGCCTCTCTGGGTTTCAGTTTC  
TTTGTGGGGAAATGAAGATGGCCACGCCACCTCCTCAGGTGCACTGGGTGCAGGGCCAA  
CACCTAGCAAGGGCTCAGGAAAGAGTGTCCCATCAGCCACAGCA

>2398 len=228 tot-seq=5

TTTTTAAAGAAGAAGAAGGAATAAGAGATGAATGAGTGAATGGAGGGAAGAAGGGGGAGA  
GGAAGAGAGAAGAAGGGAGGAAGAAGGGGGGAAGAGGGAGAAATGGGGGAAAAAATGAAG

AAGAGAAGAAGAGTGAGGGATGAAGGAATTAGGGTTGTAAACCGCTTTTGATTGGGAGCA  
AGCCTTCGGGTGAGTGTACCTTTCGAATAAGCGCCGGCTAACTACGTG

>2399 len=228 tot-seq=5

AGTGGCAAGAAGGATCCAGGCAGTGGCACTTACCCCGTGAGAGTCACCTCTCCTCCCACC  
TCTCCCTCTCTCAGGCAGGACTTTGGGGAATTTGGTTCAACGGCCTCAGAGTTTGGGGA  
CTCCTAGATCTCCCTGTGCATGCTCACACCAGACTGAATCGAGGCTTTGTGTCACAGGTG  
AAGTAGTGTCTAAGACTAATCCATTCTTCTCTTCCCAACAAGTTCA

>2400 len=228 tot-seq=5

CATCTCCAGATCTAGCTGTCTGGGGAGGCGCAGGCTCATTTCCACTAGAAAAGCGGGATT  
TGCCTTCCCTTAAATGCACATTCCACTCTGCGTTTTTAAAAGGCAAATAAAGACACTTC  
CCAGAAGCATTAAAAACAAGGAACAGAAATGTCCAAGGATCACAGTGTCCAGCCCCTGGC  
TTAGAAGATGAAGCAGTGTCTGAAGGCACCTGTTCTTCCCAAATTAAC

>2401 len=233 tot-seq=5

GGAGCAGGTGGCTCGTCCAAGGGGGAAGCCAAGAAAGCTTTATGAACAGGTTCTACAGAA  
AAGGGCAGGATTAATGACCCAACAAGCTGCACCCTGGGGCCAGATGCAGGAGGCCAGCA  
TCCCTGAAGGGGCCAGTAGAGGGAAGGTTACCAGAACAGGTGAGAACCAGGGCTGCCAAA  
GAGGCCCAGACAGCAGCTGCAGCCTTGGGTGGAGGAACCTGCCTAACTGTGGC

>2402 len=237 tot-seq=5

GAATAGTGGAGTAAGGAATTTCAAAAATTCACCTTCTGCATTAAGGAATAAAAACATTGGC  
AAAAATGGTCTAAATATCTTTTTAGAACTCTGGAAATTACCTAAAGACTTGCAACAATC  
CAAGACACATCTGTTAAAGAAAAATGGCTGAATCTGGGTAAGAACAGCAAACCTTTGTGGT  
ATTTAATTTGCCTAATTCTACCCCTCTTCTCCAGCTCTGCACTAGCCTTGCGAA

>2403 len=238 tot-seq=5

AGGAGCGCAGAGTGTTGCTTTGTGAGAAGGACCCGCCAGCGTTGCTGGCCTTTAAGATG  
GAGGAAGGGGGCCGTGTGGTAGGAATGTGGGGCCCTCAGGAGGGAAGGAAATTGGCTCTC  
CCAGGAGCTTCCAGAAAGGAATGCACCCCTGCTGACACTTTGATTTTGGCCCCAGTGAGC  
CTCGTGTGGACTCCTGGACTACGGAGCTGTAAGATAATAAATGTGTGCTGTTTTAAG

>2404 len=239 tot-seq=5

TGTAGGCAGGATCTTGCTGCGTCTTGCAGCTGCTGCAAACCTCACTTTCAGTCCC GCGGT

GACAGCTGGAGCTTCCTCCAGGCCGGCCTTGGGGGCTCCTGCTCCTGCTGGCAGCTTCTC  
CGCGTGGTGGCCCTGCAGCTTGCCCGGAGGCTGGCCAGGTCCCCTTGCAGGGCGGCCAC  
CTGGTAGAAAGACACCACCGTGAGGCAGCAAGACAGCAGTGCCAGCAGCAAGGTTGCAG

>2405 len=134 tot-seq=5

GCGCGCAAATTACCCACTCCCGACCCGGGGAGGTAGTGACGAAAATAACAATACAGGAC  
TCTTTCTAGGCCCTGTAATTGGAATGAGTCCACTTTAAATCTTTAATGAGGATCAATTG  
GAGGGCAAGTCTGG

>2406 len=155 tot-seq=5

TGAGGAATATTGGTCAATGGACGGAAGTCTGAACCAGCCAAGTAGCGTGCAGGATGACGG  
CCCTATGGGTTGTAAACTGCTTTTATATGGGAATAAAGTGAGGCACGTGTGCCTTTTTGC  
AGGTACCGTATGAATAAGGACCGGCTAATCCGTG

>2407 len=100 tot-seq=4

TGATGGGTCAGGCACAAATCTTGCCTCAGGAATGTGAATTCTAGTGGGGACACAGAAAC  
AAACCACACGACCACAGAAGAGATGGGAAAAAGAACACAG

>2408 len=103 tot-seq=4

GTTGTGGCCAAATGGGTGTTTCTCATGGAAGATCTTAGAGGTGAAAGAGCAAGTACAGTG  
TGTGCCTTCTGGACTGGTGGCTGAAACAGCAGAGAAAGGAAGG

>2409 len=106 tot-seq=4

CCTGGGTGGGGCCAGATTCCAGTTGACCCACTCAGCCACTAAAGGCTCTAGGGAAAGAG  
CGGTGCTCTGTGCTGGTTGTGGAGTGTTACTTGAGGACTCTGAAAC

>2410 len=106 tot-seq=4

TAGTGGTGGAAGTGAATCTCATCAGGCTGTCCAGGCACAGCAGTGCCCTAGAGAGCAGC  
TCTCAGTGTTCCAGGGCTAGAGAAGCTTCTGATCCCCACCATC

>2411 len=106 tot-seq=4

GCACTTAACAAATGCTTGCCAAGTAAATCGTTGGAATATGTTGGAGATCATCTAATCTCT  
GGGGGTTTGCAGTGTTCTGGCAGCCTCAGAGGCTGTGAACATCTC

>2412 len=108 tot-seq=4

CCACAGTCTGTAAAAATTATGACATGGAATTACACAATGTGGCAGCCCTGGAAACTACCC  
AAACCACTTCTATTTCTAGTCCTGTATTCCCTTCAATACCTACTACAT

>2413 len=109 tot-seq=4

GGCACTAAGCATGTGGACAAGTAGTGTGTGTAGATAATGCACACACGCGCAGACACATTT  
AAAGCAACAACCTGCCACCTTGTCCCTCCACATCCGGGGTCCATCACCTC

>2414 len=109 tot-seq=4

CAAACCTCGAAGGTAGAGAGCCTCGCCTACCAAACCTCCGGAGAAAGCAATGACAGTGTGTG  
CTCTACGCACTCCTCACGCGCCTGAGGACACAGCACAGAAAGGAGGATT

>2415 len=112 tot-seq=4

TAGGGAATCTTCCACAATGGACGCAAGCCTGATGGAGCAACGCCGCGTGAGTGAAGAAGG  
GTTTCGGCTCGTAAAGCTCTGTTGTTGGGAAGAAGGTCAGGGGACGTAAC

>2416 len=113 tot-seq=4

ATTCCAGCCTGCAGCTGAAGAATTAACACTACGCTGTGAATAACTTTGTTACTCTCTTC  
CACATTTTAAAAGAAGATACCAGACTACCACTTCAGAGTTGGAATTTCAAACA

>2417 len=114 tot-seq=4

GTGAGTGAAGAAGGTTTTTCGGCTCGTAAAGCTCTGTTGTTGGTGAAGAAGGACAGAGGTA  
GTAACCTGGCCTTTATTTGACGGTAATCAATTAGAAAGTCACGGCTAACTACGTG

>2418 len=115 tot-seq=4

TGGGTGTGGTGAAGGTGTTTCAGGGTCTGGTTGCATCTTGTAGCTGGAGCTTAGGGAAAC  
TGCAGAGAGGGTGTAGGCTCTGAGAGGGAGCAGCCAGGCTCCAAGGCTTTTTGTC

>2419 len=116 tot-seq=4

GCCAGGCTGGGTGTGGAGGGTTCAGGCCTCTCGGATGCATCTGGAGTGTGCTGGGGCTGG  
GCACCAGGCCTCCTGGGAGGTCTGTCTTGGTTGCTGGAGGGTGGGGTCTGATGTC

>2420 len=116 tot-seq=4

TGACCGCACTTGTGAGGAGTGCCATGCCTGGCTCCGAGGCTCCTAGTTTCAAGTGGTGTA  
ACAGTTCCAGGCTATTGAGTAAGAGTTCTTATTAGGCCATGTGATCCAGCAGCCGC

>2421 len=119 tot-seq=4

GTTGTTTTGCTTTCGTAAGCCATATTATGTAAGTAACATCTTGAACATGGAGCTGAGCCA  
ACCTAGAGGTCACATCAGGAGGGAAAAGGGGAAAGAGGCTATTCAAGGAAGTGGAAAGA

>2422 len=121 tot-seq=4

GACGGTAAGGAGGGCGTCACAGGCCCTGGGCATGTTGGGTGGGGGGCAGCAGGACGGTAA

GGAGGGCGTCACAGGCCCTAGGCATGACGGGCGGGGGAAAGTGAGGACACAGAGCCTGGG  
C

>2423 len=124 tot-seq=4

GGGCAGGAGAAGGCTTCATTCATTTGCTTACTCCTTTTAATTAGTAATGCTTTGTATAACC  
TACCTGTGATGTGCTATCCTCGTAGGCACTTCAGGGCAGCTCTTCTGCAGCATGGAGAGG  
AGAG

>2424 len=126 tot-seq=4

CAGCTCCGGGTACGGGGCCCCGGTCTGGGCTGGTGCACGGGAAGGAGATGCCGAAGGG  
GTATCGGGCGCCCCTGGCACACGCCAAGCCACCGTATTCTATATCTCACTCATCACCAT  
GGCCAT

>2425 len=126 tot-seq=4

GCATTATTCCTTAGGCTTTCCTGTGGGGGTTGCATATTGATTTGTTTTCTTTTTAAAA  
GCACATGCATACGAGAGAACTTATTATTTACATGACTCTGGTGTGATCACTAGGTTGTA  
TCTTGG

>2426 len=126 tot-seq=4

GGGGCAGCGAGCCCCGCCCTCCCAGCTGAGGGGGCGGGAGGCCACGCCCCGGGGGGGGC  
TCCAGCGACCGACGGTTGAGCCCCTGCGTTGTTCTCCTCCTCCCGGCCGTGTCGCACCG  
CCGGGA

>2427 len=127 tot-seq=4

ACTCGTTTTTTGATGAGGAATAGCAGTTGTAGAGAAGTGTGACTGCAGATCACATGACTA  
GAAGTGACAGGTCAAGACTAGATTCCAATCAGTCAGGGTTCTCTGGAGAAACAGCTCC  
CCCCGGG

>2428 len=128 tot-seq=4

CATTTACCCCGGAATTGGAGTTCATCAGGTGGAAGCACATTCCAGGGAAAGGGGCCGGCG  
TGTGCACAGTCCAGAGGTAGGAAGGAGCTGCAGAGCTGGGCTGTGGTTTCTGCCCTGCCT  
GTTACCAC

>2429 len=130 tot-seq=4

GTGATTCTCCTGCCGACGCTCCTGATTAGCTGGGATTACAGGCACACACCATGCCTGGC  
TAATTTTTGTACTTTTAGTAGAGACGAGGTTTCACCATGTTGGCCAGGTTGGTATTGAAG



CACCAGTGTA

>2430 len=131 tot-seq=4

TTGCAGTGAGCCAAGATCTAAGCCTGGGCAACAGAGCAGAACTCCATCTCAAAAAATA  
CAAAATAAAATTTAAAAATAAATTTTTACTACCCAGCCTTGGGCTGGGTGTAGTGGCTCA  
CGCCTGTAATC

>2431 len=131 tot-seq=4

CCCGGTGGGGGACTTGTGCTGAGCTCTGGTTCTGCAGAGGGCAAGTCTCACCTCTCTGT  
GCCTCAGTTTCCTTATCTGCAGAATGGGAGTATGTGAATCACCATCCTCTTAACTGCTCC  
ACCCAGTTCCT

>2432 len=133 tot-seq=4

AAATGAGAACAGGAAGGCATGGCAAGATACTAACATCATGGAAGACATTTTTTCATGAATT  
ATGTCCCCATAGTTGTCCTGGGAGTTGGGTCCCCACTTACTGAAAGAGAAAGCCCAGAG  
GTATGCAAGAGTG

>2433 len=133 tot-seq=4

TGAGCATCCTGAAAAAGAAAATTAAGGATTTCATAAAGGAAATGGCTGAGCCTCACAGC  
TGGCAAGCAATGCCTGCTTCATCCCTAACAGCAGCAATCTTACGCCATTATCAGCGACAT  
GGCATCCTCTCCC

>2434 len=134 tot-seq=4

CTCTAACTTTTAGCCTGCTAGTCTTGAAGTCACAGGAAAAAGAGAAATGTTGAAAAGTG  
AATTTAGCATTTAGTTCTACATTGTTAAAAGTTTATAATGAAAGCTCTCTAAGTGAAAGG  
GGATAGCAGAATAA

>2435 len=134 tot-seq=4

GTTTCTTAGACTGTAAGTCAAATGGAAAATTAATTCACGAGGGAAACACAAAGCGTCT  
CCATTCATCTCTTAATACCCAGGTGCATTATGGGCTTCATCAGCAAGGAGCGAGAACGC  
GCTCTGCTCAAGGA

>2436 len=134 tot-seq=4

TCACAACAGTGGCAATTGTGGTGTGCAGAGGGTGGCAGAGTCACCAGCGTCTATGCATGT  
GTTCATAACCAGCAATGACAGTGCGACTGAGTGCCACACATTAGTGGTGTGGGGGGGCAG  
CATGTTGCTTACA

>2437 len=134 tot-seq=4

TGGGGAATATTGGACAATGGAGGAAACTCTGATCCAGCAACTCTGTGTGTGAAGAAGGTT  
TTAGGACTGTAAAACACTTTTAGTAGGGAAGAAAAAATGACGGTACCTACAGAAGAAGC  
GACGGCTAAATACG

>2438 len=134 tot-seq=4

TGGGGAATTTTGCACAATGGGGGAAACCCTGATGCAACGACGCCGCGTGATTTAGAAGGC  
CCTCGGGTTGTAAAATCTTTGTATAGGAAGAAAATGACAGTACTATACGAATAAGGAC  
CGGCTAATTACGTG

>2439 len=135 tot-seq=4

TGGGGAATATTGGGCAATGGGGGAAACCCTGACCCAGCAACGCCGCGTGAAGGAAGAAGG  
TCTTCGGATCGTAACTTCTATCCTTGGTGAAAATAGTGATGGTAGCCAAGAAGGAAGCC  
CCGGCTAACTACGTG

>2440 len=135 tot-seq=4

TGGGGAATATTGCGCAATGGGGGAAACCCTGACGCAGCGACGCCGCGTGCGGGATGAAGG  
CCTTCGGGTTGTAAAGCTCTTTCACCGGAGAAGATAATGACGGTATCCGGAGAAGAAGCC  
CCGGCTAACTTCGTG

>2441 len=135 tot-seq=4

TGGGGAATCTCCGCAATGGACGAAAGTCTGACGGAGCAACGCCGCGTGAGTGATGAAGG  
CCTTAGGGTTGTAAAGCTCTTTCACCGGAGAAGATAATGACGGTATCCGGAGAAGAAGCC  
CCGGCTAACTTCGTG

>2442 len=135 tot-seq=4

TGGGGAATCTTGCGCAATGGGCGAAAGCCTGACGCAGCCATGCCGCGTGGATGATGAAGG  
TCTTAGGATTGTAAAATCCTTTCACCGGTGAAGATAATGACTGTAGCCGGAGAAGAAGCC  
CCGGCTAACTTCGTG

>2443 len=135 tot-seq=4

TGGGGAATATTGCACAATGGAGGAAACTCTGATGCAGCGACGCCGCGTGAGCGAAGAAGT  
ATTCGGTATGTAAAGCTCTGTCAGCAGGGAAGATAATGACGGTACCTGACCAAGAAGCC  
CCGGCTAACTACGTG

>2444 len=135 tot-seq=4

TGAGGAATATTGGTCAATGGGGGAAACCCTGATGCAGCGACGCCGCGTGAGTGAAGAAGT  
ATCTCGGTATGTAAAGCTCTATCAGCAGGAAAGATAATGACGGTACCTGACTAAGAAGCC  
CCGGCTAACTACGTG

>2445 len=135 tot-seq=4

TGGGGAATATTGGGCAATGGGGGAAACCCTGACCCAGCGACGCCGCGTGAGTGAAGACGG  
CCTTCGGGTTGTAAAGCTCTGTTGCAGAGGACGATAATGACGGTACTCTGTGAGGAAGCC  
ACGGCTAACTACGTG

>2446 len=135 tot-seq=4

TGGGGAATATTGGGCAATGGGCGAAAGCCTGACCCAGCGACGCCGCGTGGAGGAAGAAGG  
TTTTCGGATTGTAAACTCCTGTCTTCGGGGAAGATAATGACGGTACCCGAGGAGGAAGCC  
ACGGCTAACTACGTG

>2447 len=135 tot-seq=4

TAGGGAATTTTGCGCAATGGGCGAAAGCCTGACGCAGCAACGCCGCGTGATCAAGACGCC  
CTTCGGGGTGTAAAGATCTGTCAGTGGGGACGAAACTTGACGGTACCCACAGAGGAAGCA  
CCGGCTAACTCCGTG

>2448 len=135 tot-seq=4

TGGGGAATATTGCACAATGGGCGAAAGCCTGATGCAGCGATGCCGCGTGAGGGAAGAAGG  
TCTTCGGATTGTAAACCTCTGTTTTTCAGGGACGATAATGACGGTACCTGAGGAGGAAGCT  
CCGGCTAACTACGTG

>2449 len=135 tot-seq=4

TGGGGAATATTGCTCAATGGGGGAAACCCTGAAGCAGCAACGCCGCGTGGGTGAAGACGG  
CCTTCGGGTTGTAAAGCCCTGTCTTCGGGGACGATAATGACGGTACCCGAGGAGGAAGCC  
ACGGCTAATTACGTG

>2450 len=135 tot-seq=4

TGGGGAATATTGCACAATGGGCGCAAGCCTGATGCAGCAACGCCGCGTGAACGATGAAGG  
TCTTCGGATCGTAAAGTTCTGTTGCAGGGGAAGATAATGACAGTACCATACGAATAAGGA  
CCGGCTAATTACGTG

>2451 len=135 tot-seq=4

TGGGGAATATTGCACAATGGGCGCAAGCCTGATGCAGCGACGCCGCGTGAGTGAAGAAGT

ATTTGGTATGTAAAGCTCTGTCAGCAGGGAAGAAGATGACGGTACCTGAATAAGAAGCC  
CCGGCTAACTACGTG

>2452 len=135 tot-seq=4

TGGGGAATATTGCACAATGGGCGCAAGCCTGATGCAGCAACGCCGCGTGAGTGATGAAGG  
TTTTCGGATCGTAAAGCTCTGTCTTTGGGGAAGATAATGTCGGTACCCAAGGAGGAAGCC  
ACGGCTAACTACGTG

>2453 len=135 tot-seq=4

TGGGGAATATTGGACAATGGGCGCAAGCCTGATCCAGCCATGCCGCGTGGATGATGAAGG  
CCCTAGGGTTGTAAAGCTCTTTGCGCGGGGAAGATAATGACGGTACCCGCGAGAAGAAGCC  
CCGGCTAACTTCGTG

>2454 len=135 tot-seq=4

TGGGGAATATTGGACAATGGGCGCAAGCCTGATCCAGCAATGCCGCGTGAGTGATGAAGG  
CCCTAGGGTTGTAAAGCTCTTCTACCCGGGAAGATAATGACTGTACCGGGAGAATAAGCC  
CCGGCTAACTCCGTG

>2455 len=135 tot-seq=4

TGGGGAATATTGCACAATGGGCGCAAGCCTGATGCAGCGACGCCGCGTGAAGGAAGAAGT  
ATTTGGTATGTAAACTTCTATCAGCAGGGAAGAAGATGACGGTACCTGAGTAAGAAGCA  
CCGGCTAAACACGTG

>2456 len=135 tot-seq=4

TGGGGAATATTGCACAATGGAGGGAACCCTGATGCAGCGATGCCGCGTGAGGGAAGAAGG  
TTTTAGGATTGTAAACCTCTGTCTTAGGGGACGATAATGACGGTACCCTAGGAGGAAGCT  
CCGGCTAACTACGTG

>2457 len=135 tot-seq=4

TGAGGGATATTGGGCAATGGGGGAAACCCTGACCCAGCAACGCCGCGTGAGGGATAACGG  
TTTTCGGATCGTAAACCTCTGTCCTCTGTGAAGATAGTGACGGTAGCAGAGGAGGAAGCT  
CCGGCTAACTACGTG

>2458 len=135 tot-seq=4

TGGGGAATATTGCACAATGGGCGAAAAGCCTGATGCAGCAACGCCGCGTGAGTGATGAAGG  
CCTTCGGGTCGTAAAGCTCTTTGATCAGGGATGATAATGACAGTACCTGAAAAACAAGCC

ACGGCTAACTACGTG

>2459 len=135 tot-seq=4

TGGGGGATATTGCACAATGGGCGAAAGCCTGATGCAGCGATGCCGCGTGAGGAAGAAGG

TCTTCGGATTGTAACTCCTGTCTTTAGGGACGATAATGACGGTACCTAAGGAGGAAGCT

CCGGCTAACTACGTG

>2460 len=135 tot-seq=4

TGGGGAATCTCCGCAATGGACGAAAGTCTGACGGAGCAACGCCGCGTGAGTGAAGAAGT

ATTCGGTATGTAAAGCTCTATCAGCAGGGAAGAAAATGACGGTACCTGACTAAGAAGCC

CCGGCTAACTACGTG

>2461 len=135 tot-seq=4

TGGGGGATATTGGACAATGGGGGAAACCCTGATCCAGCGATGCCGCGTGAGGGAAGAAGG

TTTTCGGATTGTAAACCTCTGTGGAGGGGGACGATAATGACGGTACCCCTTTAGGAAGCC

ACGGCTAACTACGTG

>2462 len=135 tot-seq=4

TGGGGAATATTGGACAATGGGGGCAACCCTGATCCAGCGACGCCGCGTGAGCGAAGAAGT

ATTCGGTATGTAAAGCTCTATCAGAAGGGAAGAAAATGACGGTACCTTACTAAGAAGCT

CCGGCTAAATACGTG

>2463 len=135 tot-seq=4

TGGGGAATATTGCACAATGGGGGGAACCCTGATGCAGCGACGCCGCGTGAGTGAAGAAGC

GCCTCGGCGCGTAAAGCTCTGTCAGCAGGGAAGAAGATGACGGTACCTGACCAAGAAGCC

CCGGCTAACTACGTG

>2464 len=135 tot-seq=4

TGGGGAATATTGCACAATGGGCGAAAGCCTGATGCAGCGACGCCGCGTGAACGATGAAGT

ATTCGGTATGTAAAGTTCTATCAGCAGGGAAGATAATGACGGTACCTGACTAAGAAGCC

CCGGCTAACTACGTG

>2465 len=135 tot-seq=4

TGGGGAACATTGGACAATGGGCGAAAGCCTGATCCAGCCATGCCGCGTGAGTGATGAAGG

CCTTAGGGTTGTAAAGCTCTTCGGCGGGGACGATAATGACGGTACCCGCAGAAGAAGCC

CCGGCTAACTTCGTG

>2466 len=135 tot-seq=4

TGGGGGATATTGCACAATGGGGGAAACCCTGATGCAGCAACGCCGCGTGAAGGAAGAAGG  
TCTTCGGATTGTAACTTTTGTGCGCAAAGGAAGATAATGACGGTACTTTGTGAGAAAGCC  
ACGGCTAACTACGTG

>2467 len=135 tot-seq=4

TGGGGAATATTGGACAATGGGCGCAAGCCTGATCCAGCCATGCCGCGTGAGTGATGAAGG  
CCCTAGGGTTGTAAAGCTCTTTCAGCGAGGAGGATAATGACGTTACTCGCAGAAGAAGCC  
CCGGCTAACTTCGTG

>2468 len=136 tot-seq=4

GAACAAGCTCAGAGATGACAGTGAACGAAGGTCCTCAATGACCCTATCCAAATCTAGAAG  
GAGAATAGAACGAGACAGGAAGGAGACTTAGGAGCCTGGAGAACCAGAGTCCAACAAGAG  
TAGCCAGACAGCCTGG

>2469 len=136 tot-seq=4

TAGGGAATTTTTCGCAATGGGCGAAAGCCTGACGCAGCAATGCCGCGTGAATGTTAAACC  
CTTCGGGGTGTAAAGTTCTGTTCAGTGGGGACGAACAAATGACGGTACCCACAGAGGAAGC  
ACCGGCTAACTCCGTG

>2470 len=136 tot-seq=4

TGGGGGATATTGCACAATGGGGGAAACCCTGATGCAGCGACGCCGCGTGGGTGAAGAAGC  
GCTCCGGCGCGTAAAGCCCTGTCAGCAGGGAAGAAAAGGACGGTACCTGACTAAGAAGC  
CCCGGCTAACTACGTG

>2471 len=136 tot-seq=4

GCGCGCAAATTACCACTCCCGGCTCGGGGAGGTAGTGACGAAAGATAACGATACGGGAC  
TCATCCGAGGCCCCGTAATCGGAATGACTACACTTTAAATCCTTTAAGGAGTATCAATTG  
GAGGGCAAGTCTGGTG

>2472 len=136 tot-seq=4

TGGGGAATATTGCACAATGGGGGAAACCCTGATGCAGCGACGCCGCGTGAGCGAGGAAGT  
ATTCGGTATGTAAAGCTCTGTTCAGCAGGGGAGAAGAATGACGGTACCTGAAGAAGAAGC  
ACCGGCTAAATACGTG

>2473 len=136 tot-seq=4

TAAGGGATATTGCGCAATGGGCGAAAGCCTGACGCAGCAACGCCGCGTGCCCGAGGAAGG  
CCTTCGGGTCGTAAAGGGCTTTTAGGGCTGAAGAGAACGGACGGTAAGCCCGGAAGAAGT  
GTCGGCTAACTACGTG

>2474 len=137 tot-seq=4

TGGGGAATATTGCACAATGGGGGAAACCCTGATGCAGCGACGCCGCGTGAGTGAGGAAGT  
ATTTCCGGTATGTAAAGCTCTATCAGCAGGGAAGAAGAAATGACGGTACCTGACTAAGAAG  
TCCCGGCTAACTACGCG

>2475 len=137 tot-seq=4

TGGGGAATTTTCCGCAATGGGCAAAGCCTGACGGAGCAATGCCGCGTGGAGGTAAAAGG  
CCTACGGGTCATGAACTTCTTTTCTGGAGAAGAAACAATGACGGTATCTGGGGAATAAG  
CATCGGCTAACTCTGTG

>2476 len=137 tot-seq=4

TGGGGAATATTGGGCAATGGGCGAAAGCCTGACCCAGCGACGCCGCGTGAGGGAAGAAGT  
CCTTCGGGATGTAAACCTTAGTCGACAGGGACGAAGAAATGACGGTACCTGTAGAGGAAG  
CCACGGCTAACTACGTG

>2477 len=137 tot-seq=4

TGGGGAATATTGCACAATGGGCGCAAGCCTGATGCAGCGACGCCGCGTGAAGGATGAAGG  
TCTTCGGATCGTAACTTCTATCAGCAGGGAAGAAACCATGACGGTACCTGACTAAGAAG  
CCCCGGCTAACTACGTG

>2478 len=137 tot-seq=4

CAAGCCTGATGGAGCAGCACCGCGTGAGTGAAGAAGGGTTTCGGCTCGTAAAGCTCTGTT  
GTTGGAGAAGAACGTGCGAGAGAGTAACTGGTCACGAAGTGACGGTAACCAACCAGAAAG  
TCACGGCTAACTACGTG

>2479 len=137 tot-seq=4

TGGGGAATTTTCCGCAATGGGCGAAAGCCTGACGGAGCAATGCCGCGTGAAGGCAGAAGG  
CCCACGGGTCATGAACTTCTTTTCTCGGAGAAGAAAAAATGACGGTATCTGAGGAATAAG  
CATCGGCTAACTCTGTG

>2480 len=137 tot-seq=4

CCGAGGTTGGATGGGCCACGCCAGCTCAGCAGAGCTCCCTGCAACCGGCCAAGCCCTCA

GTCTGCAAACCTTTCTGGTACTGGGTTTGGGAGGGCCATGGGATTGGACAAGACTCCAGTG  
CCACCCAGAGGCTGAAC

>2481 len=138 tot-seq=4

TGGGGAATATTGCACAATGGAGGGAACCTCTGATGCAGCGATGCCGCGTGAGGGAAGAAGG  
TTTTAGGATTGTAAACCTCTGTCTTCGGGGACGAAAAAAAAAGACGGTACCTGAGGAGGAA  
GCTCCGGCTAACTACGTG

>2482 len=138 tot-seq=4

TGGGGAATCTTGCGCAATGAGGGAAACCTGACGCAGCGACGCCGCGTGCGGGATGGAGG  
CCTTCGGGCCGTGAACCGCTTTCAGCAGGGAAGACATTAAGGACGGTACCTGCAGAAGAA  
GCCCCGGCTAACTACGTG

>2483 len=138 tot-seq=4

TGGGGAATATTGGGCAATGGGCGAAAGCCTGACCCAGCAACGCCGCGTGAAGGAAGAAGG  
TTTTCGGACTGTAAACTTCTTTAGACAGGGACGAAGGAAGTGACGGTACCTGTAGAATAA  
GCCACGGCTAACTACGTG

>2484 len=138 tot-seq=4

TGGGGAATATTGCACAATGGGCGCAAGCCTGATGCAGCAACGCCGCGTGAACGATGAAGG  
TCTTCGGATCGTAAAGTTCTGTTGCAGGGGAAGAAAAAATGACGGTACCTACAGAAGAA  
GCAACGGCTAAATACGTG

>2485 len=138 tot-seq=4

TGAGGAATATTGGTCAATGGACGCAAGTCTGAACCAGCAATTCTGTGTGTGTGAAGAAGG  
TTTTAGGACTGTAAAACACTTTTAGTAGGGAAGAAAAAATGACGGTACCTACAGAAGAA  
GCGACGGCTAAATACGTG

>2486 len=138 tot-seq=4

TGGGGGATATTGCACAATGGGGGGAACCCTGATGCAGCAACGCCGCGTGTGGGAAGAAGG  
TTTTCGGATTGTAAACCACTGTTCTTAGTGAAGAAGAAAGTGACGGTAACTAAGAAGAAA  
GCTCCGGCTAACTACGTG

>2487 len=139 tot-seq=4

GGCTCCAGGGGGCTGGCTGCTCTTAATTCCTAAATGGAAGCAGATCCCCTTTCCCCAAA  
CCATCCTTGATGATGATGGTCAGAGATGGATAGGCTGTCATCTGAAGAACTGAGAGGGT



TCCAGGGGGACAAGGTAGA

>2488 len=139 tot-seq=4

TTGGGAATATTGGACAATGGAGGAACTCTGATCCAGTGACGCCCGTGAAGGAAGAAGG  
TCTTCGGATTGTAACTTATTTTGTTCAGGGAAGAAAAAATGACTGTACCTGAAGAAAA  
AGCACCGGCTAACTACGTG

>2489 len=139 tot-seq=4

TGTGGGGAATATTGGGCAATGGGGGAAACCCTGACCCAGCGACGCCCGTGAGGGATGAA  
GGTTTTCGGATTGTAACTCTGTCTTCGGGGACGAAAAAATGACGGTACCCGAGGAGGA  
AGCCACGGCTAACTACGTG

>2490 len=139 tot-seq=4

CTTAGCTTGTCTTTGCTCCTGCATCTGGGTACCTCTGACCCTGACACCCTAGCCCACT  
TTCCCTGGTGCCCACTGACATAGATGCCCTCAGCGAGGCAGAGGAGGCCACTGTGGGT  
GGTGTGGCCAGGGGCTCCT

>2491 len=140 tot-seq=4

TGGGGAATATTGCACAATGGGCGCAAGCCTGATGCAGCGACGCCCGTGAGGGATGACGG  
CCTTCGGGTTGTAACTCTTTTGCCAGGGACGAAGCGCAAGTGACGGTACCTGGAGAAG  
AAGGACCGGCCAACTACGTG

>2492 len=140 tot-seq=4

TAGGGAATCTTCCACAATGGACGCAAGTCTGATGGAGCAACGCCCGTGAGGGATGACGG  
CCTTCGGGTTGTAACTCTTTTCAGCAGGGACGAAGCGCAAGTGACGGTACCTGCAGAAG  
AAGCACCGGCTAACTACGTG

>2493 len=140 tot-seq=4

TGGGGAATATTGCACAATGGGCGAAAGCCTGATGCAGCAACGCCCGTGCGGGATGACGG  
CCTTCGGGTTGTAAACCGCTTTTCAGTAGGGACGAAGCTAACGTGACGGTACCTACAGAAG  
AAGGACCGGCCAACTACGTG

>2494 len=140 tot-seq=4

TGGGGAATATTGCGCAATGGGCGAAAGCCTGACGCAGCGACGCCCGTGGGGGATGACGG  
CCTTCGGGTTGTAACTCTTTTCAGCAGGGACGAAGCGAAAGTGACGGTACCTGCAGAAG  
AAGCACCGGCCAACTACGTG

>2495 len=140 tot-seq=4

TGGGGAATATTGCACAATGGAGGGAACTCTGATGCAGCGACGCCGCGTGAGGGATGGAGG  
CCTTCGGGTTGTAAACCTCTTTTATCGGGGAGCAAGCGAGAGTGAGTTTACCCGTTGAAT  
AAGCACCGGCTAACTACGTG

>2496 len=140 tot-seq=4

ATGTGTCTCAAGCTGTAACCTTCTGATTTGAGCAGCAGGGAAGGAGCAGTTCCTCTCAGCA  
TAAGATGAGGGATTTTGTATCAAATATCTTCCCATCCCACCTTGTACTGTCACACGCCA  
AAGCCAGCTCCACACAGGGC

>2497 len=140 tot-seq=4

TGGGGAATATTGCACAATGGGCGGAAGCCTGATGCAGCGACGCCGCGTGAGGGATGACGG  
CCTTCGGGTTGTAAACCTCTTTCAGCAGGGACGAAGCGTGAGTGACGGTACCTGCAGAAG  
AAGCGCCGGCCAACTACGTA

>2498 len=141 tot-seq=4

CCACGGGTCCCCTCACTGGGAGGGACATGGTCACTAGCCTTGGCCCTTTTTGGCTTAATC  
CCTTCTTCTTGACTGGGATATCCTCTTCTATTCAACCAGTAACTGAGAGAATATTCAAC  
TGGTTCTTCCGAGTCTAAGT

>2499 len=142 tot-seq=4

TGGGGAATCTTGCGAATGGGGGCAACCCTGACGCAGCGACGCCGCGTGCGGGACGAAGG  
CCTTCGGGTCGTAAACCGCTTTCAGCAGGGACGAGGCCGAAAGGTGACGGTACCTGCAGA  
AGAAGCCCCGGCTAACTACGTG

>2500 len=142 tot-seq=4

TGGGGAATATTGCACAATGGGCGCAAGCCTGATGCAGCGACGCCGCGTGAGGGATGAAGG  
CCTTCGGGTTGTAAACCTCTTTCAGCGGGGACGAAGCCGTGAGGTGACGGTACCCGCAGA  
AGAAGCGCCGGCCAACTACGTG

>2501 len=142 tot-seq=4

GGACGAAAGTCTGATGGAGCAACGCCGCGTGAGTGAAGAAGGGTTTCGGCTCGTAAACT  
CTGTTGGTAGTGAAGAAGGATAGGGGTAGTAACTGGCCTTATTTGACGGTAATTAATTA  
GAAAGTCACGGCTAACTACGTG

>2502 len=142 tot-seq=4

TGGGGAATTTTGGACAATGGGGGAAACCCTGATCCAGCCATGCCGCGTGCGGGATGACGG  
CCTTCGGGTTGTAAACCGCTTTTATCGGGAGCAAGCCTTCGGGTGAGTGTACCTTTCGA  
ATAAGCACCGGCTAACTACGTG

>2503 len=142 tot-seq=4

TGAGGAATATTCCACAATGGGCGAAAGCCTGATGGAGCAATGCCGCGTGCGGGATGAAGG  
CCTTCGGGTTGTAAACCGCTTTTACGAGGGACGAGGCCGCAAGGTGACGGTACCTGCAGA  
AGAAGCCCCGGCTAACTACGTG

>2504 len=142 tot-seq=4

TGGGGGATATTGCACAATGGAGGAAACTCTGATGCAGCGACGCCGCGTGCGGGATGACGG  
CCTTCGGGTTGTAAACCGCTTTTATCGGGAGCAAGCCTTCGGGTGAGTGTACCTTTCGA  
ATAAGCACCGGCTAACTACGTG

>2505 len=142 tot-seq=4

TAGGGAATATTCCACAATGAGCGAAAGCTTATGGAGCGACACAGCGTGACGATGAAGG  
TCTTCGGATTGTAAACCGCTTTTATGGAGCAAGCTTCGGGTGAGTGTACCTTTCGA  
ATAAGCGCCGGCTAACTACGTG

>2506 len=142 tot-seq=4

TGGGGAATATTGGACAATGGAGGGAACCCTGATGCAGCGACGCCGCGTGCGGGATGAAGG  
CCTTCGGGTTGTAAACCGCTTTTACGAGGGACGAGGCCGCAAGGTGACGGTACCTGCAGA  
AGAAGCCCCGGCTAACTACGTG

>2507 len=142 tot-seq=4

TGGGGAATATTGGACAATGGGCGCAAGCCTGATCCAGCCATGCCGCGTGCGGGATGAAGG  
CCTTCGGGTTGTAAACCGCTTTTACGAGGGACGAGGCCGCAAGGTGACGGTACCTGCAGA  
AGAAGCCCCGGCTAACTACGTG

>2508 len=142 tot-seq=4

TAGGGAATATTCCACAATGAGCGAAAGCTTATGGAGCGACGCCGCGTGCGGGATGAAGG  
CCTTCGGGTTGTAAACCGCTTTTACGAGGGACGAGGCCGCAAGGTGACGGTACCTGCAGA  
AGAAGCCCCGGCTAACTACGTG

>2509 len=142 tot-seq=4

TGGGGAATATTGGGCAATGGGCGAAAGCCTGACCCAGCAACGCCGCGTGCGGGATGAAGG

CCTTCGGGTTGTAAACCGCTTTCAGCAGGGACGAGGCCGCAAGGTGACGGTACCTGCAGA  
AGAAGCCCCGGCTAACTACGTG

>2510 len=144 tot-seq=4

TGGGAATATTGCACAATGGGCGCAAGCCTGATGCAGCGACGCCGCGTGAGGGATGACGG  
CCTTCGGGTTGTAAACCTCTTTCAGTACAGAACAAGGCCTTCGGGTTGAGGGTATGTGCA  
GAAGAAGCGCCGGCTAACTACGTG

>2511 len=144 tot-seq=4

TGAGGAATATTGGTCAATGGGCGAGAGCCTGAACCAGCCAAGTAGCGTGAAGGAAGACTG  
CCCTTCGGGTTGTAAACCGCTTTTGATTGGGAGCAAGCCTTTGGGTGAGTGTACCTTTC  
GAATAAGCGCCGGCTAACTACGTG

>2512 len=144 tot-seq=4

TTATTCTGTCTGGAAGAGAAACATTTATTCTGTGTTTGACATTGTGCATGGTATCTAATT  
GACCAGTAATAGCATTTTCTGTGTAATTCTGGAGTGATTTCTTAAAGGTAAAAGCAGTAG  
AAAAAGTACATTTTCTGATACTGT

>2513 len=144 tot-seq=4

TGGGAATATTGCACAATGGGCGCAAGCCTGATGCAGCAACGCCGCGTGCGGGATGACGG  
CCTTCGGGTTGTAAACCGCTTTTAGTAGGGAAGAAGGGCTTCGGCTTGACGGTACCTGCA  
GAAAAAGGACCGGCTAACTACGTG

>2514 len=145 tot-seq=4

TAGGAATCTTCGGCAATGGACGAAAGTCTGACCGAGCAACGCCGCGTGAGGGATGGAGG  
CCTTCGGGTTGTAAACCTCTTTTGTTAGGGAGCAAGGCATTTTGTGTTGAGTGTACCTTT  
CGAATAAGCACCGGCTAACTACGTG

>2515 len=146 tot-seq=4

TGGGAATATTGCACAATGGGCGCAAGCCTGATGCAGCGACGCCGCGTGAGGGATGACGG  
CCTTCGGGTTGTAAACCTCTTTCAGTTGGGACGAAGCCAGCTTGCTGGTACGGTACCTT  
CAGAAGAAGCACCGGCTAACTACGTG

>2516 len=146 tot-seq=4

CACAGACCTGGATGTCATTGTGCGGGTTCCAGTCCGAGTCGTAGATGATGACAGTGTCCG  
CCGTGGCCAGGTTGATGCCAGACCACCTGCCCGGGTTGAGAGGAGGAAGCAGAAGTCTGCT

GGGCCCCGGGGGCTGAAAAAGAGAGG

>2517 len=146 tot-seq=4

TGCAGGCCACTCTGGTGATTGGGTGGCTCTGCTCCATGGAGTGACCCAGGGATCCACGTT  
GCTTCCATCTTGATGTTTCCAGCCATCCCCACAGTGTTCCTGCCTGAGTTGCAGTCTAGA  
CTGGCTCACCCACTGAGTTGCCTT

>2518 len=147 tot-seq=4

TAGGGAATCTTCCACAATGGACGCAAGTCTGATGGAGCAACGCCGCGTGAGTGAAGAAGG  
GTTTCGGCTCGTAAAGCTCTGTTGTTGGGGAAGAAGGATAGAGGGAGTAACTGGGCTTTA  
TTTGACGGTAATCAACCAGAAAGTCAC

>2519 len=147 tot-seq=4

TGAGGAATATTGGTCAATGGACGCAAGTCTGAACCAGCCAAGTAGCGTGCAGGATGACGG  
CCCTATGGGTTGTAAACTGCTTTTATATGGGGATAAAGTAGGGAACGTTTGCAGGTACCA  
TATGAATAAGGACCGGCTAATCCGTG

>2520 len=148 tot-seq=4

TGGGGAATATTGCACAATGGGGGAAACCCTGATGCAGCGACGCCGCGTGAGTGAAGAAGT  
ATTTGGTATGTAAAGCTCTATCAGCAGGGAAGAAAAACCGCAAGGTTATGACGGTACC  
TGAATAAGAAGCCCCGGCTAACTACGTG

>2521 len=149 tot-seq=4

ACAAAATGGACGCAAGTCTGATGGAGAAACGAAGCGTGAGTGAAGAAGGGTTTCGGCTCG  
TAAAGCTCTGTTGTTGGTGAAGAAGGACAGGGGTAGTAAATGACCTTTGTTTACGGTAA  
TCAATTAGAAAGTCACGGCTAACTACGTG

>2522 len=149 tot-seq=4

CCGTTTTGGGAGGGGGGATTCTGTACTTTACAGATAATTGAAAGATCCGCCATGATCGT  
TTAAGCATTGCGTCTTGGTGTCTATAAACTCCCATGTAGAATCTGTTTTTTCCATA  
GGTTGTGCATTTCTGGCTCTCAAATAGTC

>2523 len=149 tot-seq=4

AGCAGCCGGAGGGTGGAGATGGGACACGTATGGGTCACCTCCACCGTGACAGAGGACAGCA  
GAGAAGGACAGCAGAGAAGCCCAGCAGCTGGAGGGTGGAGATGGGCCACGTATGGGTAC  
CTCCACCAGGCAAAGGACAGCAGAGAAGC

>2524 len=150 tot-seq=4

TGGGGGATATTGCACAATGGGCGCAAGCCTGATGCAGCGACGCCGCGTGAGTGAAGAAGT  
ATTCGGTATGTAAAGCTCTATCAGCAGGGAAGAAAGGCCCTATTAGGGAGATGACGGTA  
CTGACTAAGAAGCCCCGGCTAACTACGTG

>2525 len=150 tot-seq=4

AAATGTTACAGTTTTCTCTAGCCCAGGACAGCTCTGGTGAGAAATTCTCCCTGAAGAGC  
CAGCCCACCTTGCTGTACCCATAACCCCTCTGCAGCCACTGGCTGCAATAGGTGCAGCT  
CTGCTGTGCACCTCAATCTCCTCTGCAATC

>2526 len=151 tot-seq=4

TGACAACTGGCTCCTGCTTACTTTGTCATAGTCGTA CTGTGACGAACATCTGGTGTCAA  
TCGTAGGTACAGGCAGCGAGCTCCTGGGATATGAACAGTCTCCTTAAACTTATAGTTGTC  
TCTGACAGGGTGTACTGTTTCCACGGTCTTC

>2527 len=151 tot-seq=4

ACAATCTTAACTTCAGGAAATGCAATCACATTTTACTAGCTTTGCAAAAAATGAATAAAA  
TGACATAGCTGAACAGAACTCAAGTAGGATCTGTGAACGGCAGCATGAAGTGGATAATGG  
GATAACGTACCGATGAGGGAAATTTATATAC

>2528 len=152 tot-seq=4

CCAGCCTGGGCCGAGCCAGCCCCTCTCCCTTTGTACCCAGGGACATGCACTGTAACGAG  
ATCACAGTGCCTACTGAATTATTCAGAGCTGCCCTGAGTGTCAGTTTTATTATAAACATG  
CAGATTGCTCCAGGCTCCAAACTTCCAAACCT

>2529 len=153 tot-seq=4

GGGTTGCTTTCTCCAACCCCCACATTTGCCTCCTGATTCCAACCTCACGAAGCACTGTCT  
CCAAAAGCCCCCAACCACATTCTACACCTTGAGCACTCCACTTTGGTGGAGTATGCTTTG  
TAACTGAAGTAGGTGGTAGGTATCATAACAAG

>2530 len=155 tot-seq=4

TGAGGAATATTGGTCAATGGACGGAAGTCTGAACCAGCCAAGTAGCGTGCAGGACGACGG  
CCCTCCGGGTTGTAAACTGCTTTTAGTTGGGAATAAAGTGCGGGACGCGTCCCGTTTTGT  
ATGTACCATCAGAAAAAGGACCGGCTAATTCCGTG

>2531 len=155 tot-seq=4

TGAGGAATATTGGACAATGGGTGAGAGCCTGATCCAGCCATCCCGCGTGAAGGATTAAGG  
ACCTATGGTTTGTAACCTTCTTTTTACAGGGATAAACCTAGATACGTGTATCTAGTTGA  
AGGTACTGTAAGAATAAGCACCGGCTAACTCCGTG

>2532 len=155 tot-seq=4

TGAGGAATATTGGTCAATGGTCGGAAGACTGAACCAGCCATGCCGCGTGCAGGAAGACGG  
CCTTATGGGTTGTAACCTGCTTTTTGTAAGGGAAGAATAAGTCGTATGTATACGGCGATGA  
CGGTACTTTACGAATAAGCATCGGCTAACTCCGTG

>2533 len=155 tot-seq=4

TGAGGAATATTGGTCAATGGACGAGAGTCTGAACCAGCCAAGTAGCGTGAAGGATGACTG  
CCCTATGGGTTGTAACCTTCTTTTATAAGGGAATAAAGTGCGCCACGTGTGGTGTTTTGT  
ATGTACCTTATGAATAAGGATCGGCTAACTCCGTG

>2534 len=155 tot-seq=4

TAAGGAATATTGGTCAATGGACGAAAGTCTGAACCAGCCATGCCGCGTGAAGGATTAAGG  
CCCTCTGGGTTGTAACCTCCTTTTATGTGGGACGAAAAAAGACCTTTTCAGGTCACTTGA  
CGGTACCATAGGAATAAGCACCGGCTAACTCCATG

>2535 len=155 tot-seq=4

TGAGGAATATTGGACAATGGTCGGAAGACTGATCCAGCCATGCCGCGTGCAGGATGACGG  
CCTTATGGGTTGTAACCTGCTTTTTGTAAGGGAAGAATAAGGAGTACGAGTACTTTGATGA  
CGGTACCTTACGAATAAGCATCGGCTAACTCCATG

>2536 len=155 tot-seq=4

TGAGGAATATTGGTCAATGGGCGAAAGCCTGAACCAGCCATGCCGCGTGAAGGAATAAGG  
CCCTATGGGTCGTAACTTCTTTTGTATCGGAGCAATAAGGGCCACGTGTGGTCCGATGA  
GATTACGATACGAATAAGCATCGGCTAACTCCGTG

>2537 len=155 tot-seq=4

TGAGGAATATTGGTCAATGGCCGGGAGGCTGAACCAGCCAAGTCGCGTGGAGGACGAAGG  
TCCTATGGATTGTAACCTTCTTTTGTGCGGGAATAAAGTCGGGGACGCGTCCCCGTTTGC  
ATGTACCGCACGAATAAGCATCGGCTAACTCCGTG

>2538 len=155 tot-seq=4

TGAGGAATATTGGTCAATGGGCGCGAGCCTGAACCAGCCAAGTAGCGTGCAGGATGACGG

CCCTATGGGTTGTAACTGCTTTTATGCGGGGATAAAGTCGGCTACGTGTAGCCGTTTGT  
AGGTACCGCATGAATAAGGACCGGCTAATTCCGTG

>2539 len=155 tot-seq=4

TGGGGAATATTGCGCAATGGGGGAAACCCTGACGCAGCCAAGTAGCGTGAAGGATGAAGG  
CTCTATGGGTCGTAACTTCTTTTATATAAGAATAAAGTGCAGTATGTATACTGTTTTGT  
ATGTATTATATGAATAAGGATCGGCTAACTCCGTG

>2540 len=155 tot-seq=4

TGAGGAATATTGGTCAATGGGCGGGAGCCTGAACCAGCCAAGTCGCGTGAGGGAAGAAGG  
TACTGAGTATTGTAACTTCTTTTCCAGGGGACAAAGGCGGCCACGGGTGGCCGTAAGA  
GGGTACCTGGAGAAAAAGCATCGGCTAACTCCGTG

>2541 len=155 tot-seq=4

TGAGGAATATTGGTCAATGGGCGAGAGCCTGAACCAGCCAAGTAGCGTGAAGGAAGACTG  
CCCTATGGGTTGTAACTTCTTTTATGAGGGAATAAAAAGGGGAACGTGTTCCCTATTGC  
ATGTACCTTATGAATAAGCATCGGCTAACTCCGTG

>2542 len=155 tot-seq=4

TGAGGAATATTGGTCAATGGAGGCAACTCTGAACCAGCCATGCCGCGTGCAGGATGACGG  
TCCTATGGATTGTAACTGCTTTTGTACAGGAAGAACTCTCTACGAGTAGAGACTTGA  
CGGTACTGTAAGAATAAGGATCGGCTAACTCCGTG

>2543 len=155 tot-seq=4

TGAGGAATATTGGTCAATGGGCGAGAGCCTGAACCAGCCAAGTCGCGTGAAGGATGAAGG  
TTCTATGGATTGTAACTTCTTTTATTCGAGGGTAAAGTGTGGTACGTGTACCATATTGC  
AAGTATCGAATGAATAAGCATCGGCTAACTCCGTG

>2544 len=155 tot-seq=4

TGAGGAATATTGGTCAATGGGCGCAGGCCTGGACCAGCCAAGTCGCGTGAGGGAAGACGG  
TCCTACGGATTGTAACTTCTTTTGTGCGGGGAGTAACGTGCGGGACGGGTCCCGTATTGA  
GAGTACCCGAAGAAAAAGCATCGGCTAACTCCGTG

>2545 len=155 tot-seq=4

TGGGGAATATTGCGCAACGGGGGAAACCCTGAACCAGCCAAGTAGCGTGCAGGATGACGG  
CCCTATGGGTTGTAACTGCTTTTACGCGGGGATAAAGTGCGTGACGTGTCTCGCATTGC



AGGTACCGCGTGAATAAGGACCGGCTAATTCCGTG

>2546 len=155 tot-seq=4

TGGGGAATCTTCCGCAATGGGCGAAAGCCTGAACCAGCCAAGTAGCGTGCAGGATGACGG  
CCCTATGGGTTGTAAACTGCTTTTATATGGGAATAAAGTGAGGGACGTGTCCCTTATTGC  
ATGTACCATATGAATAAGGACCGGCTAATTCCGTG

>2547 len=155 tot-seq=4

TGAGGAATATTGGTCAATGGACGCAAGTCTGAACCAGCCAAGTAGCGCGCAGGATGACGG  
CCCTATGGGTTGTAAACTGCTTTTACGCGGGGATAAAGTGCGTGACGTGTCTCGCATTGC  
AGGTACCGCGTGAATAAGGACCGGCTAATTCCGTG

>2548 len=155 tot-seq=4

TGGGGAATATTGCGCAATGGGGGAAACCCTGACGCAGCGACGCCCGTGCGGGATGAAGG  
CTCTATGGGTCGTAAACTTCTTTTATATAAGAATAAAGTGCAGTATGTATACTGTTTTGT  
ATGTATTATATGAATAAGGATCGGCTAACTCCGTG

>2549 len=155 tot-seq=4

TGAGGAATATTGGTCAATGGGCGGGAGCCTGAACCAGCCAAGTCGCGTGAAGGAAGAAGG  
TACTTAGTATTGTAAACTTCTTTTGTGCGGGGAACAAAGGCGGAGACGCGTCTCCGGATGA  
GTGTACCCGAAGAAAAAGCATCGGCTAACTCCGTG

>2550 len=155 tot-seq=4

TGAGGAATATTGGTCAATGGACGGAAGTCTGAACCAGCCATGCCGCGTGCAGGATGACGG  
CTCTATGAGTTGTAAACTGCTTTTGTACGAGGGTAACCCCGGGTACGTGTACCCGGCTGA  
AAGTATCGTACGAATAAGGATCGGCTAACTCCGTG

>2551 len=155 tot-seq=4

TGAGGAATATTGGTCAATGGAGGCAACTCTGAACCAGCCATGCCGCGTGCAGGATGACGG  
TCCTATGGATTGTAAACTGCTTTTATACGGGAAGAAAACAAGCTACGAGTAGCTAATTGA  
CGGTACCGTAAGAATAAGGATCGGCTAACTCCGTG

>2552 len=156 tot-seq=4

TGAGGAATATTGGTCAATGGACGCAAGTCTGAACCAGCCAAGTAGCGTGCAGGAAGACTG  
CCCGCAAGGGTTGTAAACTTCTTTTGTATGGGATTAAGTCACCTACGTGTAGGTGTTTTG  
CAGTTACCATACGAATAAGCATCGGCTAACTCCGTG

>2553 len=156 tot-seq=4

TGAGGAATATTGGTCAATGGCCGGGAGGCTGAACCAGCCAAGTCGCGTGAGGGAAGACGG  
TCCTATGGATTGTAAACCTCTTTTGCCGGGGAGCAAGCTGTGCCACGTGTGGCGCAGCTG  
AGAGTACCCGGAGAAAAAGCATCGACTAACTCCGTG

>2554 len=156 tot-seq=4

TGAGGAATATTGGTCAATGGCCGGGAGGCTGAACCAGCCAAGTCGCGTGAGGGAAGACGG  
TCCTATGGATTGTAAACCTCTTTGTGAGGGAGCAAAAACTGCCACGCGTGGCGCAGCTG  
AGAGTACCCGGAGAAAAAGCATCGGCTAACTCCGTG

>2555 len=156 tot-seq=4

GCACATCATGTGGAGAAAGCAGGACAGAGGAAGGGAGGTGTCATGCACTTTAAACAGCCA  
GATCTTGTCCAAAGTCACTCACTATCAAGAGGACAGAGCCATAGGGATGGCACTAAACCA  
CTCAAGAGAAATCCATCCCCATGATCCAATCACCTC

>2556 len=156 tot-seq=4

ATGGCACACGGGGGCGGGGTGTCGGAGGCGGCCTGTGCAGATCCCCTGACCCCTGCCTT  
CTCAGGGCGACAGAAACAAGGCCGTCATACTTAGAGGTGCTGGGCGGCTGAGGAGTGGAG  
CGGGTGGGAGGTGCGGGGCTGCAGGGGGATTAGCTC

>2557 len=156 tot-seq=4

TGAGGAATATTGGTCAATGGGCGCAAGCCTGAACCAGCCAAGTCGCGTGAGGGAAGACGG  
TCCTATGGATTGTAAACCTCTTTTGCCGGGGAGCAATGCAGGCCTTGCAGGCCTGAGGG  
AGAGTACCCGGAGAAAAAGCATCGGCTAACTCCGTG

>2558 len=156 tot-seq=4

TGAGGAATATTGGTCAATGGGCGAGAGCCTGAACCAGCCAAGTCGCGTGAAGGAAGACTG  
CCCGCAAGGGTTGTAAACTCTTTTGTATGGGATTAAGTCACCTACGTGTAGGTGTTTG  
CATGTACCATTCGAATAAGGACCGGCTAATCCGTG

>2559 len=157 tot-seq=4

ACGGAGACTGAGCCTTTGGATGCAGGAAGACCTGGCCGACTGGAGCAAGACAGATGCACA  
CCTACAGCAGGCAAGAAATCCAGTCCGCCTTAGCTCAGTCAGGCCAGCCTGGGGGGCCT  
GCTTCCACGCACTGCCTGCTGTCCGCCTTCTCCTATT

>2560 len=159 tot-seq=4

TGGGGAATATTGGACAATGGGTGCAAGCCTGATCCAGCAATCCGCGTGGGTGAAGAAGG  
CCTTCGGGTTGTAAAGCCCTTTAAGTTGGGACAAAAAATCGGCGATAACATCGCCGGTC  
TTGATGGTACCGACAGAATAAGCACCGGCTAACTCTGTG

>2561 len=159 tot-seq=4

TGGGGAATTTTGCGCAATGGGCGAAAGCCTGACGCAGCAACGCCGCGTGTGTGATGAAGG  
TCTTTGGATTGTAAAGCACTTTGACCGGGACGAAACCGCATTGGCTAACATCCAATGCT  
CTGACTGTACCGGGAGAAGAAGCACCGGCTAACTCTGTG

>2562 len=159 tot-seq=4

TAGGGAATCTCCACAATGGACGAAAGTCTGATGGAGCAACGCCGCGTGAGTGAAGAAGG  
GTTTCGGCTCGTAAAGTTCTTTTATTTAGGAAAAAAGCGTGCTAGGAAATGAGCGCGCC  
TTGATGGTACTAATTGAATAAGTGACAGCTAACTATGTG

>2563 len=159 tot-seq=4

ATGGTTGGTGAGTTCTTTCTTATCCATTCTGTAGTTCTGTATCTTTTAAGTGGAGAGTTT  
AGGCCATTTGCATTCAATGTTCTATTTTTGTGCTGGTTGGTCTCCGGCTGGAAGGTGGTG  
CTTCCAGAGAGCATCAGCTGTGGTAATATGAAGAGGAA

>2564 len=160 tot-seq=4

TGGGGAATATTGCACAATGGGGGAAACCCTGATGCAGCAACGCCGCGTGAGTGAAGAAGG  
CCCTCGGGTTGTAAAGCACTTTCAGTGAGGAAGAACGCCTGGTGGTTAATACCCATCAGG  
AAAGACATCACTCACAGAAGAAGCACCGGCTAACTCCGTG

>2565 len=160 tot-seq=4

TGGGGAATATTGCACAATGGGGGAAACCCTGATGCAGCGACGCCGCGTGAGTGAAGAGGG  
CCTTCGGGTTGTAAAGCACTTTGTCCGAAAGAAAACGCCGTGGTTAATACCCGTGGCG  
GATGACGGTACCGGAAGAATAAGCACCGGCTAACTACGTG

>2566 len=160 tot-seq=4

TGGGGAATATTGCACAATGGGCGCAAGCCTGATGCAGCCATGCCGCGTGTCTGAAGAAGG  
CCTTCGGGTTGTAAAGGACTTTTGTCCAGGAAGAAAAGGCTGTTGCTAATATCGACAGCT  
GATGACGGTACCTGAAGAATAAGCACCGGCTAACTACGTG

>2567 len=160 tot-seq=4

TGGGGAATATTGCACAATGGGCGCAAGCCTGATGCAGCCATGCCGCGTGTATGAAGAAGG

CCCTCGGGTTGTAAAGCACTTTCAGTGAGGAAGAACGCCTGGTGGTTAATACCCATCAGG  
AAAGACATCACTCACAGAAGAAGCACCGGCTAACTCCGTG

>2568 len=160 tot-seq=4

TAGGGAATTTTCGGCAATGGGGGGAACCCTGACCGAGCAATGCCGCGTGAGTGAAGACGG  
CCTTCGGGTTGTAAAGCTCTGTTGTAAGGGAAGAACGGTAATGATAGGGAATGATCATT  
AGTGACGGTACCTTACCAGAAAGCCACGGCTAACTACGTG

>2569 len=160 tot-seq=4

TGGGGAATCTTGCGCAATGCGCGAAAGCGTGACGCAGCAACGCCGCGTGGGGGAAGAAGG  
CTCTCGGGTTGTAAACCCCTTTCAGGGAGGACGAAGGCATGGCCGTTAATAGCGGATCAT  
GCTGACGGTACTCCACAAGAAGCCCCGGCTAACTACGTG

>2570 len=160 tot-seq=4

TGGGGAATATTGCACAATGGGCGCAAGCCTGATGCAGCAACGCCGCGTGAGTGAAGAAGG  
GTTTCGGCTCGTAAAGCTCTGTTGTTGGAGAAGAACGTATCTGAGAGTAACTGTTACAGG  
AGTGACGGTATCCAACCAGAAAGTCACGGCTAACTACGTG

>2571 len=160 tot-seq=4

TGGGGAATATTGCGCAATGGGGGAAACCCTGACGCAGCGACGCCGCGTGCGGGATGAAGG  
CCTTCGGGTTGTAAACCCCTGTTGTTAGAGAAGAAAGTGCCTGAGAGTAACTGTTACAGT  
TTCGACGGTATCTAACCAGAAAGCCACGGCTAACTACGTG

>2572 len=160 tot-seq=4

TAGGGAATCTTCCACAATGGGCGAAAGCCTGATGGAGCAACGCCGCGTGGGTGAAGAAGG  
TCTTCGGATCGTAAACCCCTGTTGTTAGTGAAGAAGGATAGAGGCAGTAACTGGCCTTA  
TTTGACGGTAATCAACCAGAAAGTCACGGCTAACTACATG

>2573 len=160 tot-seq=4

TAGGGAATCTTCGGCAATGGGGGGAACCCTGACCGAGCAACGCCGCGTGAGTGAAGAAGG  
ATTCGGTTCGTAAACTCTGTTGTTAGAGAAGAACAGCGCATAGAGTAACTGTTATGCG  
TGTGACGGTATCTAACCAGAAAGCCACGGCTAACTACGTG

>2574 len=160 tot-seq=4

TGGGGAATATTGCACAATGGGGGAAACCCTGATGCAGCGACGCCGCGTGAGCGAAGAAGT  
ATTCGGGTTGTAAAGTACTTTCAGCGGGGAGGAAGGGAGTAAAGTTAATACCTTTGCTC

ATTGACGTTACCCGCAGAAGAAGCACCCGGCTAACTCCGTG

>2575 len=160 tot-seq=4

TAGGGAATCTTCCACAATGGACGCAAGTCTGATGGAGCAACGCCGCGTGAGTGAAGAAGG

GTTTCGGCTCGTAAACTCTGTTATTAGGGAAGAACATACGTGTAAGTAACTATGCACGT

CTTGACGGTACTTAATCAGAAAGCCACGGCTAACTACGTG

>2576 len=160 tot-seq=4

TGGGGAATATTGGACAATGGGGGGAAGTCTGATCCAGCAATTCTGTGTGTGTGAAGAAGG

TTTTCGGATCGTAAACTCTGTTGTAAGAGAAGAACAATTGTAGAGTAACTGCTACAGT

CTTGACGGTATCTTACCAGAAAGCCACGGCTAACTACGTG

>2577 len=160 tot-seq=4

TAGGGAATCTTCCACAATGGGCGCAAGCCTGATGGAGCAACGCCGCGTGAGTGAAGAAGG

GTTTCGGCTCGTAAACTCTGTTGTTGAAGAAGAAAGATAGAGGTAGTAACTGGCCTTTA

TTTGACGGTAATTAATTAGAAAGTCACGGCTAACTACGTG

>2578 len=160 tot-seq=4

TGGGGAATATTGGACAATGGGCGCAAGCCTGATCCAGCCATGCCGCGTGTTGAAGAAGG

CCTTCGGGTTGTAAAGCACTTTCAGCGAGGAGGAAGGGATGTATGTTAATAGCATGCATT

TTTGACGTTACTCGCAGAAGAAGCACCCGGCTAACTCTGTG

>2579 len=160 tot-seq=4

TGGGGAATATTGGACAATGGGCGCAAGCCTGATCCAGCCATGCCGCGTGTTGAAGAAGG

CCCTAGGGTTGTAAAGCACTTTCAGTGGGGAGAAAGGCCTTTTACCTAATACGTAAGAGG

ATTGATGTTACCCACAGAAGAAGCACCCGGCTAACTCCGTG

>2580 len=160 tot-seq=4

TGGGGAATTTTGGACAATGGGCGCAAGCCTGATCCAGCAATGCCGCGTGCGGGAAGAAGG

CCTTCGGGTTGTAAACCGCTTTTGGTAGGAACGAAAAGCTCTGGGCTAATACCCTGGGGT

GATGACGGTACCTGCAGAATAAGCACCCGGCTAACTACGTG

>2581 len=160 tot-seq=4

TGGGGAATCTTGCGCAATGCGCGAAAGCGTGACGCAGCAACGCCGCGTGGGGGAAGAAGG

CCTTCGGGTTGTAAACCCCTTTCAGTTGGGACGAAGCTTCGTGCGTGAATAGCCGGCTGG

AGTGACGGTACCTTCACAAGAAGCCCCGGCTAACTACGTG

>2582 len=160 tot-seq=4

TAGGGAATCTCCACAATGGGCGCAAGCCTGATGGAGCAACACCGCGTGAGTGAAGAAGG  
GTTTCGGCTCGTAAAGCTCTGTTGTTGGAGAAGAACGTATCTGAGAGTAACTGACCTTTG  
TTTGACGGTAATCAATTAGAAAAGTCACGGCTAACTACGTG

>2583 len=160 tot-seq=4

TAGGGAATCTCCACAATGGACGAAAGTCTGATGGAGCAACGCCGCGTGAGTGAAGAAGG  
TTTTCGGATCGTAAAGCTCTGTTGTTAAAGAAGAACACGTATGAGAGTAACTGTTTCATAC  
GTTGACGGTATTTAACCAGAAAAGTCACGGCTAACTACGTG

>2584 len=160 tot-seq=4

TAGGGAATTTTCGTC AATGGGGGGAACCTGAACGAGCAATGCCGCGTGAGTGAAGAAGG  
TCTTCGGATCGTAAAGCTCTGTTGTAAGAGAAAAACGGATCATGTAGGGAATGACATGAT  
AGTGATGGTATCTTACCAGAAAGCCACGGCTAACTACGTG

>2585 len=160 tot-seq=4

CTAAGAATCTCCACAATGGACGAAAGTCTGATGGAGCGACGCCGCGTGGACGACGAAGG  
CCGTGAGGTTGTAAAGTCCTTTTCCGGAGGGGGAACAACCCGTGCAGGGAATGGCATGGG  
GATGACGTGAATCCGGGAATAAGCCCCGGCTAACTACGTG

>2586 len=160 tot-seq=4

TAGGGAATCTCCACAATGGACGCAAGTCTGATGGAGCAACGCCGCGTGAGTGAAGAAGG  
GTTTCGGCTCGTAAAGCTCTGTTGGTAGTGAAGAAAGATAGAGGTAGTAACTGTTTCACGC  
AGTGACGGTATCCAACCAGAAAGTCACGGCTAACTACGTG

>2587 len=160 tot-seq=4

TAGGGAATATTCCACAATGGGCGCAAGCCTGATGGAGAAAAAAGAGTGAGTGAAGAAGG  
GTTTAGGATAGTAAAGCTCTGTTGTTGGAGAAGAACGTGCGTGAGAGTAACTGTTTCACGC  
AGTGACGGTACCCAACCAGAAAGTCACGGCTAACTACGTG

>2588 len=160 tot-seq=4

TAGGGAATCTCCACAATGGACGAAAGTCTGATGGAGCAACGCCGCGTGAATGAAGAAGG  
CCTTCGGGTCGTAAAATTCTGTTGTTGGAGAAGAACGTGCGTGAGAGTAACTGTTTCACGC  
AGTGACGGTATCCAACCAGAAAGTCACGGCTAACTACGTG

>2589 len=160 tot-seq=4

TAGGGAATTTTCGGCAATGGGGGAAACCCTGACCGAGCAACGCCGCGTGAAGGAAGAAGG  
AATTCGTTCTGTAACTTCTGTTATAAAGGAAGAAAGAGGCAGTCAGGAAATGGACTGCA  
GGTGACGGTACTTTATGAGAAAGCCACGGCTAACTACGTG

>2590 len=160 tot-seq=4

TGGGGAATATTGCGCAATGGGGGAAACCCTGACGCAGCGACGCCGCGTGTGTGAAGAAGG  
TCTTCGGATTGTAAAGCACTTTAAGTTGGGAGGAAGGGTTGTAGATTAATACCCTGCAAT  
TTTGACGTTACCGACAGAATAAGCACCGGCTAACTCTGTG

>2591 len=160 tot-seq=4

TGGGGAATTTTGGACAATGGGGGCAACCCTGATCCAGCCATACCGCGTGTGCGATGAAGG  
CCTTCGGGTTGTAAAGCACTTTTGGCAGGAAAGAAACGTCGCGGGCTAATACCCCGTGGA  
ACTGACGGTACCTGCAGAATAAGCACCGGCTAACTACGTG

>2592 len=160 tot-seq=4

TGGGGAATATTGGACAATGGGGGCAACCCTGATCCAGCAATGCCGCGTGTGTAAAGAAGG  
CCTGCGGGTTGTAAAACACTATCGTTGGGGAGGAAGGTGTTGAGTCGAATAGGCTTAACA  
ATTGACGTTACCCAAAGAAGAAGCACCGGCTAACTCTGTG

>2593 len=160 tot-seq=4

TAGGGAATATTCCACAATGAGCGAAAGCTTGATGGAGCGACACAGCGTGCACGATGAAGG  
TCTTCGGATTGTAACTGCTTTTGTGAGGGAAGAAAAGGTCTGTGTTAATACCATAGACT  
GCTGACGGTACCTGAAGAATAAGCACCGGCTAACTACGTG

>2594 len=160 tot-seq=4

TGGGGAATATTGCGCAATGGGGGAAACCCTGACGCAGCGACGCCGCGTGCGGGATGAAGG  
CCTTCGGGTTGTAAACCGCTTTTGGCAGGAACGAAACGGTGTCCGCTAATACCGGGCGCT  
AATGACGGTACCTGCAGAATAAGCACCGGCTAACTACGTG

>2595 len=160 tot-seq=4

TAGGGAATCTCCGCAATGGACGCAAGTCTGACGGAGCAACGCCGCGTGTGTGAAGAAGG  
TCTTCGGATCGTAAAGCACTGTTATCAGAGAAGAACACCCCATAGAGTAACTGTTATGGG  
ATTGACGGTAACTGATCAGAAAGCCACGGCTAACTACGTG

>2596 len=160 tot-seq=4

TGGGGAATTTTGGACAATGGGCGCAAGCCTGATCCAGCAATGCCGCGTGCGGGAAGAAGG

CCTTCGGGTTGTAAACCGCTTTTGTACGGAACGAAAAGGCTCTGGCTAATACCTGGGGCT  
GATGACGGTACCGTAAGAATAAGCACCGGCTAACTACGTG

>2597 len=160 tot-seq=4

TGGGGAATATTGCGCAATGAGGGAAACCCTGACGCAGCAACGCCGCGTGAGTGAAGACGG  
CCTTCGGGTTGTAAAGCTCTGTGATTCGGGACGAAAGGCCATATGTGAATAATATATGGA  
AATGACGGTACCGAAAAAGCAAGCCACGGCTAACTACGTG

>2598 len=160 tot-seq=4

TGGGGAATATTGGACAATGGGCGAAAGCCTGATCCAGCCATGCCGCGTGGGTGAAGAAGG  
CCTTCGGGCTGTAAAGCCCTTTTGTGGGAAGAAATCCTGCTGGCTAATATCCGGCGGG  
GATGACGGTACCCAAAGAATAAGCACCGGCTAACTTCGTG

>2599 len=160 tot-seq=4

TGGGGAATATTGCACAATGGGCGAAAGCCTGATGCAGCGACGCCGCGTGAGTGAAGAAGG  
CCTTCGGGTTGTAAACTCTGTCCTCATCCAAGAGAAGGGAAGGTAGTAACTGACCTTTC  
CAGGACGGTAGATGAGGAGGAAGCCCCGGCTAACTATGTG

>2600 len=160 tot-seq=4

TGGGGAATATTGCGCAATGGGGGAAACCCTGACGCAGCCATGCCGCGTGTATGAAGAAGG  
CCTTCGGGTTGTAAAGTACTTTTCAGCGGGGAGGAAGGCGACAGGGTTAATAACCCTGTG  
ATTGACGTTACCCGCAGAAGAAGCACCGGCTAACTCCGTG

>2601 len=160 tot-seq=4

TGGGGAATATTGCACAATGGGCGCAAGCCTGATGCAGCCATGCCGCGTGTATGAAGAAGG  
CCTTCGGGTTGTAAAGTACTTTTCAGCGGGGAGGAAGGGTTAAGGTTAATAACCTTAGCC  
ATTGACGCTACCCGCAGAAGAAGCACCGGCTAACTCCGTG

>2602 len=160 tot-seq=4

TGGGGAATATTGCGCAATGGGGGAAACCCTGACGCAGCCATGCCGCGTGTGTGAAGAAGG  
TCTTCGGATTGTAAAGCACTTTAAGTTGGGAGGAAGGGCAGTAAATTAATACTTTGCTGT  
TTTGACGTTACCGACAGAATAAGCACCGGCTAACTCTGTG

>2603 len=160 tot-seq=4

TGGGGAATATTGGACAATGGGGGCAACCCTGATCCAGCGATGCCGCGTGAGTGAAGAAGG  
CCCTCGGGTCGTAAAGCTCTTAGGTTGGGAAGAAGTATGGTGGAGGATAATGCCATCAT



GTTGACGGTACCAACAGAATAAGCACCCGGCAAACCTCTGTG

>2604 len=161 tot-seq=4

TGGGGAATATTGCGCAATGGGGGAAACCCTGACGCAGCGACGCCGCGTGAACGATGACGG

CCTTCGGGTTGTAAAGTTCTGTTATATGGGACGAACAGGGCATCGGTTAATACCCGGTGT

CTTTGACGGTACCGTAAGAGAAAGCCACGGCTAACTACGTG

>2605 len=161 tot-seq=4

TGGGGAATCTTCCGCAATGGGCGCAAGCCTGACGGAGCAACGCCGCGTGAGTGAAGAAGG

GTTTCGGATCGTAAAGCTCTGTTGTTAGAGAAGAACGTTGGTAGGAGTGGAAAATCTACC

AAGTGACGGTAACTAACCAGAAAGGGACGGCTAACTACGTG

>2606 len=161 tot-seq=4

TGGGGAATATTGCACAATGGGCGCAAGCCTGATGCAGCGACGCCGCGTGAGTGAAGAAGG

TTTTCGGATCGTAAACTCTGTTGGTAGAGAAGAACGTTGGTGAGAGTGGAAAGCTCATC

AAGTGACGGTAACTACCCAGAAAGGGACGGCTAACTACGTG

>2607 len=161 tot-seq=4

TGGGGAATATTGCACAATGGGCGCAAGCCTGATGCAGCCATGCCGCGTGTATGAAGAAGG

CCTTCGGGTTGTAAAGCTCTGTTGTAAGAGAAGAACGAGTGTGAGAGTGGAAAGTTCACA

CTGTGACGGTATCTTACCAGAAAGGGACGGCTAACTACGTG

>2608 len=161 tot-seq=4

TGGGGAATCTTCCGCAATGGGCGAAAGCCTGACGGAGCAATGCCGCGTGAGTGAAGAAGG

CCTTCGGGTTGTAAACTCTGTCCTTATCGAAGAGAGGGGAGCATGTGAATAATGTGTTT

TTAGGACGGTAGATAAGGAGGAAGCCCCGGCTAACTACGTG

>2609 len=161 tot-seq=4

TAGGGAATCTTTCGCAATGGACGAAAGTCTGACGGAGCAACGCCGCGTGAGCGAAGAAGG

TCTTCGGATTGTAAAGCTCTGTTGTTAGGGAAGAACAAGTACCGTTTGAAGAGGGCGGTA

CCGTGACGGTACCTAACGAGAAAGCCACGGCTAACTACGTG

>2610 len=161 tot-seq=4

TGGGGAATATTGCGCAATGGGGGAAACCCTGACGCAGAGACGCCGCGTGAGTGATGAAGG

TCTTCGGATTGTAAACTCTGTTGTCAGGGACGAATGTACTGATCTATAATACATTTTCGG

TATTGACGGTACCTGACGAGGAAGCCACGGCTAACTACGTG

>2611 len=161 tot-seq=4

TGGGGAATCTCCGCAATGGACGAAAGTCTGACGGAGCAACGCCGCGTGAACGATGACGG  
CCTTCGGGTTGTAAAGTTCTGTTAATCGGGACGAATGGTTTGTGTGCAAATAGTGCATAG  
ACATGACGGTACCGGAATAGAAAGCCACGGCTAACTACGTG

>2612 len=161 tot-seq=4

TGGGGAATATTGCGCAATGGGGGAAACCCTGACGCAGCGACGCCGCGTGCGGGATGAAGG  
CCTTCGGATTGTAAACTCTGTTGTCAGGGACGAATGTACTAATCTATAATACATTTCCG  
TATCGACGGTACCTGACGAGGAAGCCACGGCTAACTACGTG

>2613 len=161 tot-seq=4

CAGTGCCTCTCTGAGAGGAGCTGGTGGGACTGAGATGGATGGGACTGAGATGGATGGGG  
CTGGGGCAGGGGAGGAGGAGAAGTCAGTCTGGGTCACAGATACCACACTGGCCCCTAAA  
TGGAGCAAAGAAACAGCCAGAAGCATCCAGACCTCTGCAAA

>2614 len=161 tot-seq=4

TGGGGAATCTTGACAATGGGCGAAAGCCTGATGCAGCGACGCCGCGTGCGGGATGAAGG  
CCTTCGGGTTGTAAAGCTCTGTTAATCGGGACGAATGGTCGGTGTGCAAATAGTGCATGG  
ACATGACGGTACCGGAATAGAAAGCCACGGCTAACTACGTG

>2615 len=161 tot-seq=4

TAGGGAATCTCCACAATGGACGCAAGTCTGATGGAGCAACGCCGCGTGAGTGAAGAAGG  
TTTTCGGATCGTAAACTCTGTTGTTAGAGAAGAACAAGGATGAGAGTAGAATGTTTCATC  
CCTTGACGGTATCTAACCAGAAAGCCACGGCTAACTACGTG

>2616 len=161 tot-seq=4

TGGGGAATCTCCGCAATGGACGAAAGTCTGACGGAGCAACGCCGCGTGAGTGAAGACGG  
CCTTCGGGTTGTAAAGCTCTGTGATCCGGGACGAAAGAGCCTGAGGTAAATAGCCTTGGG  
AAGTGACGGTACCGGAAAAGCAAGCGCCGGCTAACTACGTG

>2617 len=161 tot-seq=4

TGGGGAATATTGCGCAATGGGGGAAACCCTGACGGAGCAACGCCGCGTGAGTGATGACGG  
TCTTCGGATTGTAAAGCCCTGTTAATCGGGACGAATGGTTTGTGTGCAAATAGTGCATAG  
ACATGACGGTACCGGAATAGAAAGCCACGGCTAACTACGTG

>2618 len=161 tot-seq=4

TAGGGAATATTCCACAATGAGCGAAAGCTTGATGGAGCGACACAGCGTGCACGATGAAGG  
TCTTCGGATTGTAAAGCTCTGTTAATCGGGACGAATGGTTTGTGTGCAAATAGTGCATAG  
ACATGACGGTACCGGAATAGAAAGCCACGGCTAACTACGTG

>2619 len=161 tot-seq=4

TGGGGAATATTGGGCAATGGGCGAAAGCCTGACCCAGCAACGCCGCGTGAGTGAAGAAGG  
TCTTCGGATTGTAAACTCTGTTATACGGGACGAAAAGGCGGATGCCAACAGTATCCGT  
CCGTGACGGTACCGTAAGAGAAAGCCACGGCTAACTACGTG

>2620 len=161 tot-seq=4

GAGGGGGTGTGAGGCAGTCAGTGGAGAGAACAGGAGAGATCATGAAGGTGCTAGAAGGGG  
AGAAGGCCTGAGGACAGCGCGCTGGCTTGGCCTTGGAGCTGGAGCCCTTCCGGAATC  
TCCTGGCTTCTGCCCTTCCCAGCAGTCCTGTGGATCAATAT

>2621 len=161 tot-seq=4

TGGGGAATATTGCGCAATGGGCGAAAGCCTGACGCAGCAACGCCGCGTGAGTGATGAAGG  
CCTTCGGGTCGTAAAGCTCTGTCGGAGGGAACGAATGCTCTTGAGGTTAACAGCCTCGGG  
AGGTGACGGTACCCTCAAAGGAAGCACCGGCTAACTCTGTG

>2622 len=161 tot-seq=4

TTAGGAATATTCGTCAATGGGGGAAACCCTGAACGAGCAATGCCGCGTGAAGGATGACGG  
TCCTATGGATTGTAAACTTCTGTTGTTAGGGAAGAACGACTTAAGTAGGAAATGACTTAA  
GAGTGACGGTACCTTTCAAGAAAGCTCCGGCTAACTACGTG

>2623 len=161 tot-seq=4

TGGGGAATATTGGACAATGGGCGCAAGCCTGATCCAGCCATGCCGCGTGTGTGAAGAAGG  
CCTTTTGGTTGTAAAGCACTTTAAGCGAGGAGGAGGCTCCTTTAGTTAATACCTAAAGTG  
AGTGGACGTTACTCGCAGAATAAGCACCGGCTAACTCTGTG

>2624 len=161 tot-seq=4

TGGGGAATTGTTGCAATGGGCGCAAGCCTGACGACGCAACGCCGCGTGGAGGATGAAGA  
TCTTCGGGTCGTAAACTCCTGTCGAGCGGGAAGAAAACCCCTGGCGTTAACAGCGCCGGA  
GGTTGACGGTACCGCGAGAGGAAGCCCCGGCTAACTCCGTG

>2625 len=162 tot-seq=4

AGTCGGAAAGCCTGGGAAAAAAGACTTCTACTTGGAAAGGAGCAACTTTTAAAGTTAGA

AAACACATTTTTCTTTCTGCTTCGGTCACTCATCTTTGCAAAAATAGAAGTAACTATC  
AATTTATCCAAAATATAAAAGAACATAGGAATGAGAGCACTG

>2626 len=162 tot-seq=4

TGAGGAATATTGGTCAATGGGCGGGAGCCTGAACCAGCCAAGTAGCGTGCAGGAAGACGG  
CCCTATGGGTTGTAAACTCTGTTATACGGGACGAAAAGACGGATGCCAACAGTATCCG  
TCCGTGACGGTACCGTAAGAGAAAGCCACGGCTAACTACGTG

>2627 len=166 tot-seq=4

TGGAGGCTCTGAGAGGTGCTCTGGCTTGCTTACAGCAGTTATGGGAGGAGGCCTCAATTT  
CTCTTTCTGTCTCTGGCATTGCTACTGGAGCAAAGTGGCTGGAAATGGGGAATAATCCCA  
CTGGGCCTGCGAAGATCTGTGGATCTGAGAATCCGCTGACCCGGA

>2628 len=169 tot-seq=4

GGCGGGGAGGGTGCCAGTGTACAGGTTACCCCGGTAGAGCTCTGTGTTCTGGAATATTT  
CCACTGTTAATTATTCATCGGGTTTTAATTAGAAGCAGGCACTTCCCCTGAAAAAGTGCC  
ACCAACAGCTAACTTCAAAAACAGCCGACTCCCTAGCTGTGCCACCTAA

>2629 len=170 tot-seq=4

AAGAGGTAAGGGAATGGAAGACATCACATGACTAAGAGGATGGGAAGGGGTGCTATAAAA  
CTGTTTTTTAGATATGCCATGACCATTGCAATCATGAGCATGGCACAGCTGTGCTTACCT  
GCAGATGACCTGCATGAAAAGCTAAGACCTGAATAGGAAGGAGAGGAGAA

>2630 len=171 tot-seq=4

CAGCAGCTTTTCCTTCAAGCCCTGTTTTTGGATGGTGCATTTTTACTGTTGGAGGATTC  
TTGTACCTTCCCATCGTCATCCTAAGTTGAGCGTATACTGTTTTCTACTATCCTGTGAAA  
ACAGAGCGGTTTGCCTCAGGCTTTGGCTTCTTCAACCCCACTCT

>2631 len=171 tot-seq=4

GGAGCCCCATCCTCGATGTGAAGGGCGCTTGCTCAGGTTGCTGCAACAAGCCCTGGCGTT  
TGAGCAGGGCCAAAGTTTCTCATCACCTGAACCTTCCCTTTCATGCTGTTCTTCTAAGG  
CCAGCTGGCGCTGGGCATTCCACAGTCCTCGCAAGGCATTAGGCGGTATT

>2632 len=172 tot-seq=4

TGGAGCCAGGACAGCAGCCCCACCGAGCGGAAGGCATCACACACAAAATGGGAGGAGCCC  
ATGACAGTCTGCCACAGAGCAAGGGGCCCCGCCTTCCGTGCCCTGACCGGAGATCAGGC

AACAGATGGAGGACGCGTCAGTGGACAAAACAGCTAGGTTCTGCCAGTCC

>2633 len=172 tot-seq=4

GGAGGAGGCTGAAGAGGGACATGGACTGGTAGCATGGAGGCTGCTGATAACCAACCCAGG  
GCCTGACCACAGTGGTGGGACATGGGGGAGGTCAAGGAATGGATGCCACCCTTCCAAGAA  
AAGGGTGCACAGAGCAGGCTGCAGGAAAGGCTCTGACGCCCTCACCTGCAC

>2634 len=173 tot-seq=4

CGGGAGGCAGCAGGAGGGAATCTGCCACAAGGGACGAAAGGCGGAGGGAGCAACGCCGCG  
TGAGTGAAGAAGGGTTTCGGCTCGTAAAGCTCTGTTGGTAGTGAAGAAAGATAGAGGTAG  
TAACTGGCCTTTATTTGACGGTAATTACTTAGAAAGTCACGGCTAACTACGTG

>2635 len=174 tot-seq=4

TTCATCCAGCTGACGGTTGATGTCGGTAACATGTTTATCGGAGATCGGATAAACCTGCA  
TGATCACCATCGAAATAGCGGCCAGCGCGATTGGGATCCACACCGCGGTCATAATGATCC  
CATCGATGGCGCTGGCGCTCTGCACGGCGCCGCTTTCATTAATCCATACACCG

>2636 len=176 tot-seq=4

AGACAGGCAGCCCACAGGAGTTGCCTCAGGTCGCTGCCCTCAGCGGGCCTGTGAGCAG  
TTGCGTACCCTCATCTCTGGTTGAGGCCAAGGTGGCCCGTAGCACCTGAGAGCACATT  
CCTACCCAGCTGATGACCCGGCCATGAGAATTCCTGCCACAGGAGAAGCTCTGA

>2637 len=179 tot-seq=4

CCGACGAGCTAGAAACAGAAGCAGCGGAAGCAGCATCATTATTCGCCTTTTCGACTCCCC  
TCTTGTTAACTTATTGTTATGCACGCCGTGAGTGTAAACGAAATCGTTTAGCAACGCAT  
AGCCGGTCCAATTCCAGCAGAATTATTTCCATCGGAATTATTTCCAGCAGAATTATTT

>2638 len=180 tot-seq=4

TGGAGTCAGACGTGTGCTCTCCGATCTCCTATGGGAGGCAGCAGTGGGGAATATTGCAC  
AAGGGGCGAAAGCCGGATGCAGCGACCCGCGTGAGCGAAGAAGTATTTGGTATGTAAA  
GCTCTATAAGAAGGGAAGAGAATGACGGTACCTTACTAAGAAGCTCCGGCTAAATACGTG

>2639 len=181 tot-seq=4

TGGGGATATTGCACAATGGAGGAACTCTGATGCAGCGACGCCGCGTGAGGGAAGAAGG  
CCTTCGGGTTGTAAACCTCTGTCTTTGGGGACGAAGAAAATGACGGTACCCAAGGAGGAA  
GCCACGGCTAACTACGTGCCAGAGCCGCGGTAATTTTTAGATCGGAAGAGCGTCGTGTAG

G

>2640 len=182 tot-seq=4

AAGCTAGCCTGGGCTAAATGAGACCCTGTCTCAAACAAACAAAATTTAAAAAAAATCTA  
TTTTCAATTTAGGTGAAAAACATCTCTGCATACTAGAAAAAGATGACCCAAAGTGGCAGA  
AATCTGAAGATCAAATCTTAAGATTGGGAAAACAGGGACACCTGCCCTCTTCATCGCCCT  
TC

>2641 len=182 tot-seq=4

TGGGAATATTGCACAATGGGGGAAACCCTGATGCAGCGACGCCGCGTGGAGGAAGAAGG  
TCCTCGGATTGTAACTCCTGTTGTTGAGGAAGATAATGACGGTACTCAACAAGGAAGTG  
ACGGCTAACTACGTGCCAGCAGCCGCGTAATCAACAGATCGGAAGAGCGTCGTGTTGGGA  
AA

>2642 len=182 tot-seq=4

AGAAAGAGGGTCTGGCAGGAGGGGCCAGGACGGGGCTCCACTGGAAAGAAGAGGCACAGA  
TCAAAGGGGACAGGTTTCAAGGAAGGGGTGCTGTCCACAGCGTCAAGTGCTGCCAAGAGGTC  
AAGATGGCGGATGAGGAAGGAGGATGCTGGACAGGGCATTGGTAACTGTGGCTGGGTGAG  
CT

>2643 len=184 tot-seq=4

TTTGAATCACTGAGCCATCTCTCCAGCTCTGCCAGTCTTTCTTTACCCTTGCAGGTTCA  
TGGAGTTTGAGGCCGAGGAAGAAACACAGATACAGAATGCACAGTTGATGAATGGCTCCC  
CGGGTCTGTCCCCTATAGCCCCTTTGAACTTGATCCTCCAGGGTCCATGGTACCTGAGG  
CTTG

>2644 len=184 tot-seq=4

CCTCCTCTGTCCCCAGAGGTGAACTGTCGGAGATGGAAAAGCACGAGTGCAGTGAGTGC  
CCAGAGCCCAGTGCAAGGTAGGCAGCAGCTGGCACCCAGCACCCGAGAGCCCAGTGCCAG  
GACAGGAGACGTCCCAACAGCCAGCACCCGAGACAGCCAGCAGCAGCCAGCGCCTGAGA  
TAGC

>2645 len=184 tot-seq=4

ACAGGAGGGGAAACTGAGGCTTGGAAAAGGCACATGGTCCCATGTAGCGTCACTGTGGCT  
CTTCGGACTCTCCAGGTCCCTCTGCCTGTCCTGGGCCTGCCATTGTTCCACCTCCAGGT

CTGCCCACTGCCTGCACCTCTCTCCCCGTCTCACCTTGCCCTGCACTGCAGCTGCCACG  
ACCT

>2646 len=185 tot-seq=4

TGGGGAATATTGCACAATGGGGGAAACCCTGATGCAGCGACGCCGCGTGGAGGAAGAAGG  
TCTTCGGATTGTAAACTCCTGTTGTTGGGGAAGATAATGACGGTACCCAACAAGGAAGTG  
ACGGCTAACTACGTGCCAGCAGCCGGGTAATTTCTAGATCGGAAGAGCGTCGTGTAGGGA  
AGGAG

>2647 len=186 tot-seq=4

TTTTTTTTTTCAAGCAGAAGACGGCATAACGAGATCAAGTGGTGACTGGAGTTCAGACGTG  
TGCTTTTCCGATCTCCTACGGGACGCAGCAGGATTGATTGGGGGTCAGCAGCTAGTTTGA  
GCCAGAGCGGGACTGAGAGGCCGAGCCTCCTGCCCTGCGGCTGCCTGGCCTGGCTCACC  
ACTTCC

>2648 len=187 tot-seq=4

GTAAAGATTCCAGCCATCTCTCAGTTGGACACTCCTGGGAAGCATCCTGTCTCCTTCTCA  
CAAGTTCTAGAAGAACCAACAGCACACCTATTGCTAGAACCCAAGAACACACAGCCCTTC  
CTGCAGCCTTATCTCGCTCTTCTACAACATGTTTCCACCTCCTTGGCCGTTTCATCTGAG  
CCGACAG

>2649 len=187 tot-seq=4

GACCTGGGCTTATGCCCTTGTACATTCTGTATGAAGCCAGGAGGATGGAGCTTGATGAC  
ATCTCCTAACGATACCCACATGCACATCTCTGTATCCTTAAAGCACTGAGTCTTGGACT  
TCAGTTCTCCTTGTGCCGGTCCACAAGGGAACCAACTCACTCCACGTTTTCTGCTTGG  
CTTCCTC

>2650 len=187 tot-seq=4

CAGGGAGAGGCCACGATGGGGCCTGCCACCAGCACTCAGACTACCCATATTTGGGCTTA  
GGCCGAGTTCCAGCCAAGGAAAGGGCAAAAAGCAAATTTAAATCCGACAATGAGAATGAC  
GGGTATGTCCCGATGTGGAATGAGTGACTCAGAGAGTGAGGCATCAGAAAAGAAATGT  
ATACACA

>2651 len=188 tot-seq=4

GGCGAGGGGAGCCCTGGATGGATGGGGGAGGCGCAGATGTGCGGCCACTGTTCCAGGACA

TTGGCCACTGGAGTGCCAGGGCAGAGGAAGAGGAGACACCCGGCAGGACAGTGAAGGGGC  
AGTGAGGAGGGAGGAGCAGTCCTGAGGAAGCAAGGGGGCAAGAGTGCAGTGAGACGACGA  
GACAGTGT

>2652 len=189 tot-seq=4

ATTGTTAATTTCTTTGGCTTACACATGCCTTGGATTTATCCTTGGAGAGAGTCTGTTATG  
GGAAGAGCTGATGTTAATGGTGGATTGACTTTCTGTAACGTAGATAATTCAAAGTAGGTC  
TATGAACGGAAAGCTCATTAAAATTGGAATGGGGAGGTGTCCGCCTGGCTTGGGAGGCG  
GACTCAGCC

>2653 len=190 tot-seq=4

GATTAACATACATCATATACATGCATGAAATTGCTAAAGAATGACATGTTAACTCCGCTC  
TGGGATCCAGAATCTTCTGGGGCGCTCTGGAACCTCAAGCCCATGTCTGCTCCTCTCTGA  
GCCTTAATTTCTCCAAGAGTGAAGTGAGAAGGCTGGGGCCTCCTGGGTCCCCAGGACAGG  
AAAATGCCTG

>2654 len=191 tot-seq=4

AGAAATCTCAACCCTAAGAGAGACTTTGCTTTTCTCAAGTTTCTTGTCATTTGCACCTCA  
AAGGCCACAAAAGTAGCCAAATCCTCCCTGCCAGTCCAGATTCCCTTATCATTACAAA  
CAAATTTGCATGTGGTGGCTCAGCCAGCAGCCGCGGGTAATTTCCAGATCGGAAGAGCGT  
CGGGTAGGGAA

>2655 len=192 tot-seq=4

GGAGTTGTTGTGAGGCAGAGTGAAGGGGATACGATATTTGCGTTCTCCTGTGGATCTGTC  
TTTGAGTGCAGTGTGCTCTACTAACCTCTCCACCCCCACCCAGGTAGGTCCTATTG  
CCCAGGCAAAGCAGTTTCGTGAAGAGTAGTGCCAGAGAGGGACTGACACCTATGGACTGT  
GGGCAAACCTTGT

>2656 len=192 tot-seq=4

GTCAGTGATGGTGGAAAAGAGACCCATGTGCTCTGGGAAATGCTAAAAACACCTACAGTA  
ACCAGGGATCCCAAGCTTTGCCAGCTACCTTTCAAGGAAGAGCTGGGAGAAGGCCTCCT  
GTGGTCCCATGAAGCTCAGCAGAGAGTCGTGGGCATTGACAGGAACAGGGCAAAGCAGAG  
ATGAGCCTAGGG

>2657 len=194 tot-seq=4



AACTGCTCTCCGATCTCCTACGGGAGGCAGCGGGGCTAACGGATCAGTGAATTTCCGC  
TGACAGCAGGCCTTGAGGGCCATGGGATCATTCTGTGCTTCAGCGAGGCCCTGCCTGCCT  
CGGCAGATGTGGTGAGCCCATCCTTTCTCGCCCAGAGTGGTCCAAAATCGCATCTGAAGA  
GGAGTCCTGAGAAC

>2658 len=194 tot-seq=4

AAGCAGTATGGTGTGGTGCTTCAAACGGTGGTATGTCACTAATTCATAGTAAGGAAGTG  
TGCCACAAAGTGAACGGATTGATGCAACTTCAAGCTGCTTGTTCATTTAGGGGACACA  
TAATACTTGGTAAGCGAGAAGCAAGCATAGTTTTTCCAGAGCCAGGAGGGCCAATCATCA  
TCACATGATGTCCT

>2659 len=194 tot-seq=4

CAGAGAGTAGGCGGCTGGGCCACGTCCTTACAGGGCGTCATGTGCCTTTCTATTTTCAT  
CTTAGAAAATTTCTCAGCAAACCGATGAGAGATTGTGGTTGCAAGCTTCAGTATTTGCC  
TCGCTTCCCTTTTCATATTTACAGAATTAACAACCTCAAGTACCTCAGACTCTGCATT  
CCAAACCAAGGCAC

>2660 len=196 tot-seq=4

ACAGTTGAAAATAATCTAGTGCAGACATCCATAAGCTACTGAGGTATTTAGAAAAGATAA  
CAAAAAGCTAACAAATTGCATGTCTTTTCCACTTACCATTACTTAGTGTTCATAAAGT  
AAATGTGGTTTCTCAGCTGAACTGCTCTTTCAAATTATTCTTAGTTAAGTAATATCCCT  
GTGAAATCTGTCATTA

>2661 len=196 tot-seq=4

TGAAGAGAGCAGTGGTTCTCCAGCAAGGTGTTTGAGCTCTGAGAACAGACAGAGTGCCT  
CCTCAAGTGGGTCCCTGACTCCCACGTAGCCTAACTGGGAGACATCTCCAGTAGGGGCC  
AACTGACACCTCACACAGGTGGGTGCCCTCTGGGACAAAGCTTCCAGATATTTGTTGTT  
CTGCAATATTTGCTGT

>2662 len=199 tot-seq=4

TTGTTTGCAGGATTGAGGCTGTGCTGGCAAAGTGTGTACAATAGCGATGTCCTAAGAAA  
GCATCTACAGAAGACCAAAGCACTATGGAGTGATCCAGGCAAACGGGAGAAGTTCGGTGT  
GGAAGGAAGAAAAAGTACACGGGCAACCCACATCTTCAGCTTAGATGCCTGACTTTTCA  
GCTTCCACCCTCTCAGTCA

>2663 len=199 tot-seq=4

CAGACAATGTTTCTTTAAAAGTCTCCATCTGCAAATCCCATTAGATGTGCATATAAGGTT  
TCTGATGATTAATAGTTGCCTGCTAGGGTTTTGGTTGGAGGGGATCTTGTGTGTGTGGGT  
TAACCCCTCCCTCTCCTCTCTCACATTTCACTTCAGAAATTTGTCCTCTCTCCCCACCG  
CAGGATTTAAAAGTGTGTC

>2664 len=199 tot-seq=4

TTCTCTAATCCCAGCTGTCTACCCCCCTCTGGTGGCCACTTCTCAGCTAAGAGAGAAGC  
CCCAGGCAGCAGGCACCATGGGAGGAAGTGGCCTGGGAAGTTGAAACAATTTAGGTGAGC  
CAGGAGGGCGGAATCCTTGAAGCGGGCTGGCCCAATAACAGGAGTTCGTTTTCGCCCT  
CGCCCAAACCTCCCTACCT

>2665 len=199 tot-seq=4

GGAGGACCCAGTTTGAATGTCATCATTAAAAGGCTCTGTAGATGAGCAGCAGGATGTGCG  
GTCTGGAGGACCAGAGTGAAGAAGCGTGGTCAGAACTGATGGCAGATGATCACGGCAAGG  
AAGGGGCAGAGGGCAACAGAGCCAAGTGGCATTGCTGCACCCTAACTGGATATGTCGAG  
AAAGGTGAAAAAGAAATGT

>2666 len=200 tot-seq=4

AGACCTGCAGCTCTCTCTGATGGAGCAGGGCAGGGGCAGGAGAGGGAGAGAAGAGCAGAA  
CACATGTAATGACAACACTCATAAGTGTAACCCACACTAGCGGCGCACAGTGCTCCTCA  
AACAGTGCTACTACACCAGCAGACGACCACACACATCGTGGAACACTAGCAGCACACAGC  
GCTCCTTAAACAGCGCTACA

>2667 len=200 tot-seq=4

CACTTACCGAGTGCCCCGTGAGGACTTGAGTGAGGCACTTCCCTTCTCCAGCTTATTCA  
CCATCTGTGCAATGAAGATGGGGAGAAGGGGGATGCCTACCTTGAAGGATAGTAGTGAGG  
CTTAAATGAGGTAATAAGCAAAGTATCAGTGAGGTGCTGAGCGTTTTATATGGTCTCTGC  
TGTTAGAGTGCCCCATCTG

>2668 len=202 tot-seq=4

CGAGCTGGGTGTGCAGGTCTTCGGGCCCTGAGTAGTGTATGTGAGTGCCAGCAATGGTG  
GGCCTAGGCAGACCAGTCCTTGGGCCTCCAAGCAGCTTGCTTGGGTGCTGGCAGTAGTTG  
GCCAGGTAGGCCTTGTGTTCTGGATGGCATGCATGGCATTGGTGGTGGTACATGAGCTC

TGCTGAGTGGCATGCACAGGTG

>2669 len=203 tot-seq=4

TAGGGAATCTTCCACAATGGACGCAAGTCTGATGGAGCAACGCCGCGTGAGTGAAGAAGG  
CCTTCGGGTTGTAAAGCACTTTCAGATGGGAAAAAGTAGTAATTCGAATAGGGTTGCTA  
TGTGATATTACTATCAGAAGAAGCACCGGCTAACTCCGTGCCAGCAGCGCGGTAATCTAC  
AGATCGGAAGAGCGTCGTGTAGG

>2670 len=203 tot-seq=4

GTGAATCACAGCCAGCAGGGACATACAAATGCCAATGCAGTGCTGTTTAGCCAAGTGAAA  
GTGACTTCAGAGACACACATGCTACAGCAGCAGCAGCAGGCCCCAGCAGCAGCAGCAGCAG  
CACCCGGTTTTACACCTTCAGCCCCAGCAGATAATGCAGCTCCAGCAGCAGCAGCAGCAG  
CAGATCTCTCAGCAACCTTACCC

>2671 len=203 tot-seq=4

GCTGGTGCATTTGGATGGGCAGGACCAAAGGGGCAAGCAAAGAGAGCCACCCTGGCACCA  
CTTAACACTGCGGCCATTTGCCACAGAGCTTCCCAGATATTGCTAACCCCTGGAGGAGG  
CAGGAATCCTCCAGTGTCACCCCGTGACGCTGCACACCCCAAACGCTCAGGCTTGAAG  
CTGCCGTCTAGCTCCTTGATAGC

>2672 len=204 tot-seq=4

TCAGGAGGTGGCTCAGCCCAATGTGCTTTCAGGAAGAAGAGTCCCCATATGGGGAGGTGG  
CACTGAAGCGGGACCGCTCTTTTTCGGAACACGACCTGGCCCAGCTTCGGAGCGAGATGG  
CATCTGGCCTTCAGTCAGCCGCTCAGCCCCAGGAGGGACGGAGCCACCTCGGGCCAGAG  
CAGGTAGCATGCACTCCTGGAGGC

>2673 len=205 tot-seq=4

GGCAATGGTGATCTAAGAGTCTTATTTACCATTTTAGGACCTAGCAGTATTGTATGGGCA  
CCCAGTATTTGTTGAATAAATGAAACCCAACTCTCTGAGACTCTTCAGGCAGATTCTTAC  
ACTCTCCTTGCTCTAGCAAATGGAAAATTACCTTACTGACATCTGCAGCATAACACCA  
GAGGAGCCCAGGAGTGGTGGCCAGA

>2674 len=205 tot-seq=4

TGGGGAATATTGGACAATGGAGGGAECTCTGATCCAGCAATTCTGTGTGTGTGAAGAAGG  
TTTTAGGACTGTAAAGCTCTGTTGTTAAGGAAGAACGAGTGTGAGAATGGAAAGTTCATG

CTGTGACGGTACTTAACCAGAAAGGGACGGCTAACTACGTGCCAGCAGCCGCGGTATCCA  
AAGATCGGAAGAGCGTCGTGTATGG

>2675 len=206 tot-seq=4

GGAACAATACTAACACCTCCCTCGTAGGTAAAAGTCTAATGAGATGAAGCAGGTGAAAGC  
ACTTTATCAACTGGGGTTATAAACTAGGTACTCACAGCCTCCAGCAGCAAGCCACTCAGG  
GAATCCAGGGAGATAAGGGGTAGGAGGCAGAAGGTGTCCAGGAGTCATGGGGTTTGGGAT  
CAGGAACAAGCAGCTGACTCTCAGCT

>2676 len=206 tot-seq=4

TGCGCTCTCCAACGGCGCGGATCCTCTTTGGAAATTAATATTAATAAAAAAAAAAAGCCGA  
GGACGCAGAGGGGAAGGTGGGGGGTAAGAGGGGAAGGCGAGACACACACACACACACAC  
GCACACGCACACACGGACACACACACACGGAGAGAGAGAGAGAGAGAGACAGAGCCCCAC  
AGTGAGAGGAAGAAAGGCAACAGTCG

>2677 len=206 tot-seq=4

CCTGGTCATTTTGTGGAGGCAACTTTTGAGTCCAAGAGGGCCTCTGCAAGCCTTTGGCCC  
CAAAGCAGACCAGCACTGTCACCATAGCTCCAATAGAGGCCACATTTGCAGTGTCTGGGA  
GAAATAAGATTGATCTATCCTCATCTCATTGGACAGGGCTCACTACCAGCTTCCAGCCCA  
GTGGTGCTGCTTCTGCCTGAACTTGG

>2678 len=208 tot-seq=4

GCAGGTCAGATCTCTTTAACCAGAGTTTTGGAGACTGGAAGGAAACCGGAGAAGGAAGCG  
TAGGGAAGACTTGGGGAACACAGGAAGGAGGCTAGTTTTAGACCTGGGTCAGAGGGAAGG  
AACCCCTTCCCCAGAACCCAGATTCCGTCCACACCAGCAAATGAGAACCTTCCAGTCC  
ATGGGACCCACCTTGCATACATCCGAT

>2679 len=208 tot-seq=4

TCTACAATCATACTCACAATTCTTTATGATAAAGAATAATTTAATGGTAATTTTTTAT  
CTAGCTTTGTCTATGTTTCTAACATGTTTATTTACATGGTTTACAATTCAAAGATACAA  
AAGGGTATATGGTAAAAGTTCCCCCTGTTGTTTCTACTTGGGGAGTGAAAGGGAACGGG  
GGAATTGTGACGAAACAACACTAGTCCC

>2680 len=209 tot-seq=4

CCACCGAGGTGGCCAGAGACGAGACGCTGCCAGCCCATTCTCCCGCAAACGAAGACCTT

TCTTCCCCAAGGTCATTTGATCTGTTATTGCTCAGCTGCCATATCTGCCCCAGGGTCGCG  
TCCTCAAGGCGTGCCCTGCAGAGGCGGGCTGTTCTGAGGGGTGTGCCGGCAGCAGAGCC  
TGGCCACAGCCAGGGCCCTGTCTCGCTCC

>2681 len=210 tot-seq=4

GAGGAGTGAAGTGGAGTTCAGAGTGTGCTCTTCCGATCTCCTACGGGAGGCAGTAGTAGGG  
AATCTTCCACAATGGACGCAAGTCTGATGGAGCAACGCCGCGTGAGTGAAGAAGGTTTTTC  
GGGTTGTAAAGCTCTGTTGTAAAGGAAGAACGGTAGATAGAGAATATCTAAGTGACGGTA  
CCTTACCAGAAAGCCACGGCTAACTACGTG

>2682 len=210 tot-seq=4

TAGGGAATCTTCCACAATGGGCGAAAGCCTGATGGAGCAACGCCGCGTGGGTGAAGAAGG  
TTTTCGGATCGTAAAACCTGTTGTTAGAGAAGAAAGTGCCTGAGAGTAACTGTTACGT  
TTCGACGGTATCTAACCAGAAAGGGACGGCTAACTACGTGCCAGCAGCCGCGTAATGTTT  
AGATCGGAAGAGCGTCGTGTAGGGAAAGAG

>2683 len=211 tot-seq=4

TAGTCACACCAGACTCCCAGTGGAGGACTCACCTGCAAAGCTTTTGAACCCAATTTGCTC  
CTGTCTGATAAAATGCAGGGACAAAATGGAGCAGAGACTGAAGAAATGACCAGTGACTG  
GCTCAACAGGCATCAATCTCTGACAGTATTACTGATTCTATGTTGTGCTTGCAGAAAGGA  
GGCTTGCTTGGCTGTCCTCTGAAAGGCTCTA

>2684 len=211 tot-seq=4

GTGACTGGAGTTCAGACGGGGGCGCGGCAGAGCGCCGACGGGAGGCAGCAGGAGGGAAGC  
GGCCACAAGGGACGCAAGGCGGAGGGAGCAACGCCGCGGGAGGGAAGAAGGGGGGCGGCG  
CGGAAAGCTCTGTTGTTGGTGAAGAAGGACAGGGGTAGTAACTGACCTTTGTTTGACGGT  
AATCAATTAGAAAGTCACGGCTAACTACGTG

>2685 len=213 tot-seq=4

CAGTGTGTCAAACCACGAGTGGGGAAAGGTGATGGGTAAGGCCACCATTTCTTGTAACA  
TTGCAGGCAATAGGCTGATGTCATAACAACCTTCAGTGTAGAACTGTGATTTCAAGAGGC  
CTTGGTGGTTGTTTTGTTTTGTTAACAACCTTCTCCTCCCTCCCCCTTCTCTCCCCACT  
CCTCCTCTTTTTCTTCTTCTCTCCCCACCTCC

>2686 len=213 tot-seq=4

GGCATGGGACTGTGCTGGGCTCATGAGCTGTGGGCCCAAACCAACTGCAGTGGACTGAG  
AGCCAAGGACGGGCCCAGTCAGCCAGGATCAGGCACAGACCCCGCCACAGATTGGGGAG  
GCTGGGTCTTTCCAGTTGGTTCGGGGCCCATGGCTCATGAGCCCCACACAGCATTTGAA  
AGCAGGCATCCGGTACTGAGGAAGGACATCGGG

>2687 len=214 tot-seq=4

CCCAGTGGTGTATCTGAGGATACATTTGAAGACACGTTGTTGCCATATTCTGGAGGTT  
CTGGTGTTCGTACCAGCATTAGAGAAAGAGCTCAGAAACCAAAAAGGATATCAGCCAGGC  
TAGCGTGCACAAGTCCCTACAAGGACCTCTAGTGGCTACCCAGTAAGCCCTGGACTTACT  
GTGGAAAGTGTCCACCCTGGCAAGGGATTTAG

>2688 len=214 tot-seq=4

ATACGAGATACGGTAGTACTGGAGTTCAGACGTGTGCTTTCCGATCTCCTATGGGAGGC  
AGCAGTGGGGAATATTGGGCAATGGGCGAAACCCTGATGCAGCGACGCCGCGTGAAGGAA  
GAAGTATCTCGGTATGTAACTTCTATCAGCAGGGAAGAAAGTGGCTTCGGCCACGTGAC  
GGTACCTGACTAAGAAGCCCCGGCTAATTACGTG

>2689 len=214 tot-seq=4

CGAGATCTCCAGGTGACTGGAGTTCAGACGTGTGCTTTCCGACTACGGGAGGCAGCAGT  
AGGGAATCTTCGGCAATGGGCGAAAGCCTGACCGAGCAACGCCGCGTGAGTGAGGAAGGC  
CTTCGGGTTGTAAACTCTGTTGTTTGGGAAGAAGGGAAAGGGTAGGACCCTTTGGTGAC  
GGTACCAAACGAGAAAGCCCCGGCTAACTACGTG

>2690 len=216 tot-seq=4

TGGGGAATTTTGGACAATGGGGGAAACCCTGATCCAGCCATCCCGCGTGTATGATGAAGG  
CCTTCGGGTTGTAAAGTACTTTTGGCAGAGAAGAAAAGGTACCTCCTAATACGAGGTACT  
GCTGACGGTATCTGCAGAATAAGCACCCGGCTAACTACGTGCCAGCAGCCCGCGGTAATGC  
CGAGATCGGAAGAGCGTCGTGTAGGGAAAGAGTGGG

>2691 len=218 tot-seq=4

CTCTCTCCATGTGGAAGAAAACATCAGTAATGGGCAGAAAGCATTTTTCTCCAAAACATA  
GTTGAAAGAGGTTGGAGAAGGGTGTGTGGAATGGTCGTTATCTGAAAGGTGGGGATATG  
AAAAGGGGGAGGGCAGGACTTGACTCCTTTGGCAGGCAAATGGTGAGAGGTAGTGCCAGC  
TTTGAGACCACTGAGAGATTATGGTGTGTTGTCTGTGG

>2692 len=224 tot-seq=4

ACGCGTAGGTGCCCTCACCGGCCCTTGCCTCTGCTTGGGCCTGACCCTCGAGCTAGTAGG  
CAAAGGGAAGGTCAGGAGGCAGAGGACAGCCACAGCCCCTCGCCTCTGTGTGGACAGAGA  
AGGGCTGTGGCCCCTGCACGGCGAGCAGAAGGCACTGGGCTGGGGTCCTACCTTCGGGGG  
ATAGTGGAGGTTGAGCAACTGGTAAAGGCGGAAGTTGACAAAGC

>2693 len=225 tot-seq=4

CCTGAGTCAGGGACTTATAGATAAAACTCCCATCTCCCTCGGACAGAGCACCTGGGGGAA  
AGGGAGGCTATGAGCGCAGCTTCAGCAGACTTAAACATTCCTGCCTTCCAGCTCTGAAGA  
GAGCAGCAGATCCCCAGCACAACATTCAAGCTCTGCTAAGTGACAGACTACCTCCTCAA  
GCAGGTCCTGAACCCCATGCCTCCTGACTGGGAGACACCTCCCA

>2694 len=227 tot-seq=4

AGCAGAAGACGGCATAACGAGATTCAGCGGTGACTGGAGTTCAGACGTGTGCTCTCCGAC  
GGGAGGCAGCAGTGAGGAATATTGGTCAATGGACGAGAGTCTGAACCAGCCAAGTAGCGT  
GAAGGATGAAGGTTCTATGGATTGTAACCTTCTTTTATACGGGAATAAACGAATCCACGT  
GTGGATTTTTGCATGTACCGTATGAATAAGGATCGGCTAACTCCGTG

>2695 len=229 tot-seq=4

AAGATAGAGCTCTCTGAGTTTGATGTCAACCTGGCCTACATACTTAGCTAGGGCTACACA  
GTGAGACCCTGGTTCAAATCAAATGAACAAAATAACAACAATAACAACAGCACACACACA  
TTCACATGTACATCTTGACACTATCACAACCTATGAATCACTCTAACTACTATCATAAAT  
CCAATTTTTAATTTTGGTAAGCTAAAATTAGTGGTTAAAGATATTCAA

>2696 len=229 tot-seq=4

CAAGCAGAAGACGGCATAACGAGATCTGATCGTACTGGAGTTCAGACGTGTGCTCTTCTA  
CGGGAGGCAGCAGTGAGGAATATTGGTCAATGGGCGAGAGCCTGAACCAGCCAAGTCGCG  
TGAAGGAAGACTGCCCGCAAGGGTTGTAACTTCTTTTGTATGGGATTAAGTCACCTAC  
GTGTAGGTGTTTGCAGTTACCATAACGAATAAGCATCGGCTAACTCCGTG

>2697 len=230 tot-seq=4

TAGTGGCAGGGCCAAGGGCCAAGAAGCAGCCCTGCTGGGATCTGAGGAGATGGTGGTGCT  
GGGAAGCTGCAGGGCCAAGGGCTGCTGAGGTGTCCAGCGTGGTCCAGAGATTGGTTACTG  
ACAGGAGGATTAAGCACTTACTGACAGAGAAGGGATTTATACACATAGAAAAAAGAAGA

CAAGAAAGAACCCTCAGGTAGTAAGTTGGAATTGGTAGTATGTATTTTAT

>2698 len=230 tot-seq=4

AAAAGTCAGAAGACTTCAAGTCACTTTTCTCAGCATCTTTTGCTACACAAGTAAAGATAA  
AATTCAAAGAATGTAGCTTTTTGTCTTATAAATTCTTTACGTGCAGATATTTTATTGAGA  
ACATAGGAAAATGAGTGAATGTGATGTGCCAATATGGTGCTAGAAGCCAGCAGTGAACCT  
TGGCAGTTCAGGAAAAAAGCTCCATCCTTCCAGGCAAGCTCTGGTATCTG

>2699 len=230 tot-seq=4

AATGCCTCCTGGAGTGGGTCCCTGACCCCAAGTAGCCTAACTGGAAGGCACCCCCCAGT  
AAGGGGAGATGGACACCTCACACAGCCGGGCACCCCTCTGAGACAAAACCTTCGAGAGGAA  
AAATCAGGCAGCAACATTTGCTGTTCACCAATATTCAGTCTTCTACAGCATCTGCTGCTG  
ATACCCAGGCAAAGAGGGTCTGGAGTGGACCTCCAGCAAACCTCCAACAGA

>2700 len=231 tot-seq=4

ATCCTTGGGCATGTGAAATAGTCCCTAATGCAGAAAGAGATCATATTACTCCTTTCTCA  
AATTCCAGAAATGATTTAGGTCTCTGAATCAAAATATCTTACTTCATAGACTGGATAAGG  
CCAAACCGAGCCAGCAGCAGGTCACAGTACAGCTCCAGGATCTCCATGGCCTCCACGAGG  
TAGTCTTCCCGGATAATGTGCTCCACACGGATCCGAGCTCGTTCATCTTTC

>2701 len=239 tot-seq=4

TGCCACGTTTTTGGGAGAAGGTATATATTGCAGTAAAGGATCGTATGGATAGTTCTAACA  
TCTTACAACGTAGGTTGTTTTATAAGGCTTTGCATATAGGTCGTAGTCGTAATGTCTTTT  
ATAAGTCTAAGGGAAAGAGAGTTCCTTTAGGCTTGGAGCTTAAATATAGGTTCTATAATT  
CCACTGTATTAAGTTTAGTTCGAAAGCAATTAGGACTTCTTAATCAAATATTTTTCCA

>2702 len=242 tot-seq=4

TGAAGATGCTGAGAAGAGCTGCAGGATTTGAGGTATCTTACGAATGTGAGCCAAAAGCAT  
TGCCTGAGGATTTACAAAAGATAAGAAGTGTCAAGGGAGAAGATACCATGTCAAGAATGA  
CTCTGGGGTTCAGTCTGTGGGGCTGCCTGTAATTCTCAATGGCAAGGTGGCCAATGCAG  
TGCAATGAAAGATGCCAACAGAGAATCACAGCCCATCGTAACCCGGCGCCAGCTCGCCT  
CT

>2703 len=100 tot-seq=3

GGACTGCAATTGAGCATTCTCTCACCTTCCCTTCTCAGAGCTCCCCAAGCCTATGCCCA



GGTGGGAAGAGGATTACCTGAGAGCCAGAAGCCCCGGGTC

>2704 len=100 tot-seq=3

CTAAAGTGGCAATGCTTAGACTCTTTTCGTTTTGTTACAAAGGGGCGACCGCGTGGAGTTC

ATCAGTGTAGCTGCGGCAACCAAGATCTGCTTTGCATGAC

>2705 len=100 tot-seq=3

TGTCCTAGCAAAGGCATGAAAGACAAGAAATTAATCCAGGTGAAAAATTAGGAGAGTCAA

AAGCGTTTCATGCCAGGCATGGTGGCGCACACCTGTAATC

>2706 len=101 tot-seq=3

CCTCAGAAATGAAGCATGGTCAGAGCAAGGCCAGCCTCCTGCATCATGGTGGCTTCAAAG

TGCTTCAGTCTCTGAAGGGATCAGTGGGGAGGAGTTCAGCC

>2707 len=101 tot-seq=3

CGTGGATGGAGAGAGAGGAGGGATGCAGAGATGTTTAGGGCATGAGCTGGCCGGTGATGG

ATAGCATGGGGTAGGCTGGTGGTGGTGGAGGGGGTCCAGGGT

>2708 len=102 tot-seq=3

CATTCTGACTGTTCAACCAGCCCAGATTACCCTCTGATAGGCAGGCCACTGGTCAGGG

ATGAGGAGTGCCCCGCCCTATCCTCACAGAGTGAGCTTGTC

>2709 len=102 tot-seq=3

TGAGGGGCACAAGCTGCCTCGACCACCAGAACAACGCCGCCAGCGTCCAGCAGCAACGAG

GGGCACAAGCTGCCTCGACCACCAGAACAACCCGCAAGCGT

>2710 len=102 tot-seq=3

GTGTGGCCCGGCTGGATGGGTCTATTTCTCCCCTGGCCGCCTATACAGGCTTGATGTGCC

TGGGTGCAGAGCCTCAGGAGTGCAGGCCAAGCCACTCCAGTC

>2711 len=104 tot-seq=3

ACTGGGGTTGGGGGTGGAGGAGAAAGACTCTTCGCGCTTTCCAAGCTGGAAGTTGTCAGG

AATCTTATTTTAAGTCTTTGCCAAAGCAGCTCAAACCTAGTGT

>2712 len=104 tot-seq=3

GGAGAAACTCAGCCATAATATCTGCACAACAGCCCCTCCATGCAAACACCATTCCAGTAA

TGGGAAATTTTAATGATGTAAAGCAGCAAGGTCACACGATATGT

>2713 len=104 tot-seq=3

CAATGTTTCAAACGGCCAGGCGGCCAGTACGGCACCACAGCCAGCCAATGTTTCGGTTTC  
CACTACGGTACGGCTGCCGTCAGCCAGTTCGCGTTGAACGTAGT

>2714 len=104 tot-seq=3

GGCTAGGGAAGGTAACAGGCAGGCATGTTTTAAGGCCATTAGCAAAGAACAATGGGAAGC  
TGAAAGGTAATCCCAGTGAATAGAAGACACAAAAGTGGGCTTGTG

>2715 len=105 tot-seq=3

ATTCAGTGTGGAGGGCAGTCCCCCTGGTGGCTGGGTGAGCCTCTGGGCGAGCGGCCCTC  
TCGGGAGGTGGTGCGGCCCCTGGTGGCCTTGAGCTGTGTTTCTCC

>2716 len=105 tot-seq=3

TGGGGAATATTGCGCAATGGGGGCAACCCTGATGCAGCGACGCCGCGTGAGGGATGAAGG  
CCTTCGGGTCGTAAACCGCTTTTGATTGGGAGCAAGCATTTTGGG

>2717 len=105 tot-seq=3

AGGCCCGCCACACATATTTACTGAGTGAACAATTGTTCCCTAAGTGCGTAAAAAAGTACA  
GTCACGATATCTTGTAGTTGTACATTGTTAACAGCAATAGGAAAAG

>2718 len=105 tot-seq=3

ATCACCTGAGGTCAGGAGTTCGAGACTAGCCTGACCAACACGGAGAAACCCCATCTCTAC  
TAAAAATACAAAATTAGTCTGGCATGGTGGCCATTCTCTAATC

>2719 len=106 tot-seq=3

GCACTGTTTGGGGCCACTGCCTTGGTTCCTGCTCAGCACCAGACTTTGAGGGCCATGGTT  
TTATACTGCTAGTGTAGGCCTCAGCATGGTAAGAAACAGCAAGCAG

>2720 len=107 tot-seq=3

TAGGGAATCTCCACAATGGACGCAAGCCTGATGCAGCAACGCCGCGTGAGGGAAGAAGG  
GTTTCGGCTCGTAAAGCTCTGTTGGTGGGGAAGAAGGACAGGGGGAG

>2721 len=108 tot-seq=3

GGGTGGTAAAGAACTTGCAACTCCTCAGGGTCAGCCATGGGGAAGGGTTGGGATGGCAG  
AGCCAACCAGAGCAGCCAAACCAACTAACTCTCTTTCAACTACTTG

>2722 len=108 tot-seq=3

CATGACAGTTTATAAGTGCCATAGCAACATTCAGGTCTAAAAAGGGGAGGCATGAATAAT  
CCACCCCTTGCTTAGCACATAATCAAGAAAAAACATACAAATGGCAA

>2723 len=109 tot-seq=3

GATGTCATAGTCTAGGTCTATACCAGGCATTTTAAGCTGGTGACCTGGGTACAGATGTGT  
AAGAAATGTGCAAGAAGTGCTTTACCAGTTTTCTGAGAATCAAACCTG

>2724 len=109 tot-seq=3

GAGCGGAGACAGCAGGCACTTAGCATGGCCCCAGGGGCAGCCGACGCCAAATCGGAACT  
GCAGACCCCGGGGACTTCGATCAGTTGACTCAGTGCCTCATCCAGGCC

>2725 len=110 tot-seq=3

TCCTCGGAGGCCCTCTCATGGACCTCTCCTGTATTCTCTCCAGGCTTGGGTTCAAGAG  
CGGCTGCCACTGGCCATGCAGACAGAGCGAGGCACTGGCTTGCAGGCTGT

>2726 len=110 tot-seq=3

TAGGGAATCTTCCACAATGGACGCAAGCCTGATGGAGCAACGTCGCGTGAGTGAAGAAGG  
GCTTCGGCTCGTAAAGCTCTGTTGTTGGGGAAGAAGGACAGGGGTAGGAA

>2727 len=110 tot-seq=3

CAGTCATCGCCACTCTGTCCCCGCTGTCATACATCACTCAGGCCGTGGCCTTGAATGCC  
CTGTCTCTGGAGCAGCAGCTACCCTACGCCTTCTTCACCCAGACGGACTC

>2728 len=110 tot-seq=3

CAATGCAAAGCCCCAGGCACTGCCAGAGGAGGCAGCATTAGGTGGGGCAGCAGGGTAGG  
GAGCAGAGGAGCATGAAGAACTTTAGCTGATGTGGGTTAAGAGAGCTAGG

>2729 len=110 tot-seq=3

GTGAAGAAGGTCTTCGGATCGTAAAGCTCTGTTGTTGGTGAAGAAGGATAGAGGGAGTAA  
CTGTCCTTTATTTGACGGTAATCAACCAGAAAGGCACGGCTAGCTACGTG

>2730 len=111 tot-seq=3

ATCAGGATCAAGTTTTAGACATCTTTATACAGCACTGCTGAAGAAAGCCATGCTTGATTC  
GTGATTTTAACCGTCTCTCCAATACTTAAAGGAAGGAGATCACCCCCCCC

>2731 len=111 tot-seq=3

AGCAAGTGCAGGAGGAACAACAAAGGCCTAAGTGAAAATCTGGCTGTGCATGACAGCTCC  
GCATTAACCTTCAGAGAAGCTCTCCTGGGAGGTAACCTTGGCAGACTCCAG

>2732 len=113 tot-seq=3

TGGGGAATATTCCGCAATGGGCGAAACCCTGATGCAGCGACGCCGCGTGCGGGATGAAGG

CCTTCGGGTCGTAAACCGCTTTTGATTGGGAGCAAGCTTTCGGGTGAGTGTAC

>2733 len=113 tot-seq=3

ACACAAGAACCACTTTTCCTATGTTTCCTCATGCCTGCAACCTCATCTGTTCTACATCT

ATCTTTATGGCCCCAAGTCTAGCTTAGACATAGTCTTTTCCACAATAGGGTC

>2734 len=113 tot-seq=3

ACAAGACATGTCTGAGGGTACTGGGGTGGGGGGATACACAATGATGTCACACACAGGAAA

TATCAGAGGGGGACTTGGCACTTACAAGGCTGGCTCCTCTTCCATAGGCTCA

>2735 len=114 tot-seq=3

CCAGCTGTGGGTAAGGAATCCAGCAGTGGGTAAGGAAGCCAGCTGTGGCTAAGGAAGCCA

GCTATGGGTAAGGAAGCCAGCTGTGGGTAAGGAAGTCAGCAGTGGATAAGGAAG

>2736 len=114 tot-seq=3

AGGGCCAGGGGCAGCCTTCATTTACATCCTTGATCTTGGATAATTTAAATAATAGAGCT

GCTTTTCTGTATACTAGTGGTGTGAAAAGGAAGTTATCCACCTAGGACATAT

>2737 len=115 tot-seq=3

TTTACCAGCACAAAGAGACTGAAAGTCCGGCACATTTTCAATATGTGACTAGAATAATC

CACAGCGGCACCCCGGCACAAAAGCAGGGTGACCGTGTACAGCACCCCTGGGCCA

>2738 len=115 tot-seq=3

CGTGAGTGAAGAAGGGTTTCGGCTCGTAAAGCTCTGTTGTTGGTGAAGAAGGTCAGGGGT

AGTAACTGATCTTTGTGTGACGGTAATCAATTAGAAAGTCGCGGCTAACTACGTG

>2739 len=115 tot-seq=3

TAGGGAATCTTCCACAATGGGCGCAACCCTGATGGAGCAACGCCGCGTGCGGGAAGAAGG

TTTTCGGATCGTAAAGCTCTGTTGTTGGGGAAGAAGGATAGAGGTAGTAACTGGC

>2740 len=115 tot-seq=3

CGTGAGTGAAGAAGGGTTTCGGATCGTAAAGCTCTGTTGTTGGTGAAGAAGGATAGAGGG

AGTAACTGGCCTCTAATTGACGGTAACCAACCAGAAAGTCACGGCTAACTACGTG

>2741 len=116 tot-seq=3

GAAGAAGGACAGGGGTAGTAACTGACCTTTGTTGACGGTAATCCATTAGAAAGTCACGG

CTAACTACGTGCCAGCAGCCGCGGTATCCATAGATCGGAAGAGCGTCGTGTAGGGA

>2742 len=116 tot-seq=3

CCCTGACGCAGCGACGCCGCGTGCGGGATGAAGGACTTAGGGTTGTAAGAAGATTTTGAT  
TGGGAGAAAGATTTTCGGGTGAGTGTACCTTTTGAATAAGCGCCGGCTAACTACGTG

>2743 len=117 tot-seq=3

GAGAGAAGTCAGCTCCCTTTTCCCTGCCTGCTCTTTTCCCCACTTGCCAGGGTCCCTGA  
TGGGGGGAAGGGAAGAGGGAGGAAGGAAAGGGAGAGGAGCGAAGGGCAGGCAGCCAC

>2744 len=118 tot-seq=3

AAGGAGGTGAAAGAAAAGCCCAGGATTGCAGGGAGACAATACCCATATTGAGGGTGAAGG  
GCAAGTCTCTGGGATTATCAAAGCAGAAGGTGTTGTTGGCATCCACACAGTGCTGGG

>2745 len=119 tot-seq=3

GAGCCTGTTTCAGGGAGGTTAATTCTAATCTCCACAACCTGGTGAGGAATGGATGGACGT  
GTTCCCACTTATAGATGAGGATTCAGGGGCAAATGAAACCCCCCTGCAATGAGACCCTG

>2746 len=119 tot-seq=3

CGACCACCAGACCCTCAGCCCAGTGATCCCCACATCCCTTTAATACATCAGATCCTAAA  
CATGGCAGTGTTGGGTCCTCCATCAAGGATGAGGCCTCACTCCCTGACTGCTCCAGCCC

>2747 len=119 tot-seq=3

AGCAGGTGCTCGCGCCTGCCGGAAACCGACAGCGCCGTCCAGTACAGGAAACCGCACCG  
CACCGCCAGCAGCCGCAAGGACGGCAGTGCCGTCCAGCGCAGGAAATCGCACCATGCGAG

>2748 len=119 tot-seq=3

GAAGGACAGGGAGCAAAGGCAAAGCCTGTACAACATCTGGCACGCTGTGCCTCCTCAGCC  
AGCAAGGCCGCCACGGTCACGCGGCAGATGCCTGTGGGCTGTCTTCCCATGGACGACCA

>2749 len=120 tot-seq=3

ACCTGTGGGTAAAGAAGCCGTCTCAGACATTCCACTGCAGCTGAGCATCCAGATGACCAG  
TCCCTGACACTGTTTAACCACACAGTGAGAGCTGCCAAATGAGACCAGCAGAAAACTGT

>2750 len=120 tot-seq=3

GGAACGAGCAATATCAACACATATTTGGAAGATAAAAAGCTGACCGAGGAGTTAGACTCT  
TGAGAAAACTGAGTGTCAAGTGCCTAGAGACACAAGTCAATTCAAACCTCCAGAATTACAG

>2751 len=120 tot-seq=3

AATCACTTGAACCCAGAAGGCGGAGGTTGCAGTAAGTCAAGATCGCGCCATTGCACTCCA  
GCCTGGGTGACAGAGTGAGACTGTTTCAAAAAAAAAAAGGAACACCAAGAAAATTCCTCA

>2752 len=122 tot-seq=3

GACTCCGCGAAAGGAACACGACCTCGGAGGAGGACCCGGGTGCAGAGCAAGTGCTCCTG  
CACCTGCCCTTACCATGGTGACCGAGCAGCGGGCGCTGGACGACATCCTGGGGAACCTC  
TC

>2753 len=122 tot-seq=3

CTAGGCAGAGAGGGTGAGGGCCGATGGTGACCTGGAAGGGGCAGCGAGGGAGCGGGACTG  
CATGAGGATTCTGCGCGTGGGTGAGCCCAACTGTCATTTTACATTTTGTAGAAAGAGCT  
CT

>2754 len=122 tot-seq=3

GCAGAGGCTGGGTCAACACCAGCTTCTATTTGCAGAGTGGACTTCTAGGCACCCCCATTG  
GAAGGTGGATGTTCTGGGCCTGGCAGTCTTGCAGTCCAGGATGCAGGAAGCAGGGCCGAC  
AG

>2755 len=124 tot-seq=3

TGGGGAATATTGCACAATGGGCGAAAGCCTGATGCAGCGACGCCGCGTGAGTTCGGTATG  
TAAAGCTCTATCAGAAGGGAAGAAAATGACGGTACCTTACTAAGAAGCTCCGGCTAATA  
CGTG

>2756 len=124 tot-seq=3

AGAACAGAATCCAGGTGCCAGATTCTCATCTGCACATCTGCCAATGGGTGAGGGAGGGC  
CACAGACTGGAGGGAAGGCAGAAGAGAACGTCTCCATGATTTCAACCAGCCGGTCCCAT  
CTCT

>2757 len=125 tot-seq=3

TCCCTTATCGGGTTTGTTCAGCTTTTGTTCAAACTTAAAACCATTTTTTCAGGAACAA  
TTATCTCCCTAAATTCTCTATCTGCCTCTCAGATCAGCTGCAGCCAGGCAGCTGCAACCA  
GATAG

>2758 len=126 tot-seq=3

AGGCAGTGCTAAAAGTAAAGTTTATAGCCCTAAACGCTTGCATCAAAAAGTCTGAAAGAG  
CACAACTGACAATCTAAGGTCATACCTTAAGGAACTAGAGAAACAAAAATAAAACAAAC  
CAAAC

>2759 len=126 tot-seq=3

GCGCGGAACTTACCCACTCGAGACTTTCGGAGGTGGTAATGACCAGTTACATGTCAACCT  
TACGGTTGTTTGTATAGGATCGCACTTTTCCAGTGCGGTGCAATCTAGCAGAGGGCCAGT  
CTGGTG

>2760 len=130 tot-seq=3

CTCTGAAGAGGCCATCACTGGCCTGGCCTCAGGGGATGTAGCCTTCCCCCTGAACCC  
TGCTGGGCAGGCAGCATTCTGCAGCAGCCTCCAAGATGGGCCTCCTGCATTCTCCTAGGC  
CAGACTCCTC

>2761 len=130 tot-seq=3

AAACAGGGCAGAGTCGTGGACCAGATCATAGTCCAAACTCTGGGCCTCAGTTTCTCTG  
ACTTAAAGATGAGGAGGGATTAGGATTCCTGTGGCTTGCCTCTGGAAATCCCAAGGACC  
CACCCCGGCC

>2762 len=130 tot-seq=3

GAGAAGGAGGGCAAACCCAGCTACAGAGCTACTCCCTCGACCGTGAAAGGGAGGGAGAA  
GGAGGACCTCCCTTTGGAAGGAAATCCATTGCAATAGCCCCAGTCGCCGGCTTTGGTCTT  
GGCTCCACAT

>2763 len=131 tot-seq=3

GAAGGAACAGCCAATAATGACTGGCCCACTTGAAAGAGCCATGTGAGAGAGCCCACCC  
AGCACTATTAATGATACTGTGCTATGCGTATAGACAGGGACCTAGCATAAGTGTCTCTTG  
AGAAGCTTCAG

>2764 len=131 tot-seq=3

TGAGGAATATTTACAATGAGCGAAAGCTTGATGGAGCAATGCCGCGTGCAGGATGAAGG  
CCCTCGGGTTGTAACTGCTTTTATAAGAGAAGATTATGACGGTAACTTATGAATAAGGG  
ACGGCTAACTA

>2765 len=131 tot-seq=3

CTTTCATCAGAGGACTGAGTGGTTCCCATTTAGCCTGCTATTCCTGCTGCCCTCAGACTG  
CCCAGGGAGATCCTAACACACCTTCCAGCACATTCCTGTCCTGCCTTCTATTGGA ACTCT  
CCCTATTCT

>2766 len=131 tot-seq=3

TCTTCCATTAGCACCCTGAGATTCTAGGGTAGACTGGGGCAAAGTTGAGCAAGTGCCA

GCTGCCAGCTGTGGCTGAATATAGGACTCAGGGCAGCCTCCACAAAACAAATAATGAAC  
AAGCAAGCTAG

>2767 len=132 tot-seq=3

CAATGGAAGTGGTGAGATGAGATCAAATTCTGTATTTCTGGGAAAGTGGAGTCATGGTT  
TCCTGCCAGATTCAATGGGGAGTAGAGAGAGAAAGAGAGGCACAAAGATGACACCAGGCA  
GGAATGGAGTTG

>2768 len=132 tot-seq=3

ACCCAAAGGTAGGGGCAGGGAAAGGAGGGGCCAAGACTTTTTTCAGATACTCGGTTTTTTC  
TAAGGCCTTGACCTCAGCAGCTGAACTCATGGTCATGGCTGCCTTGGCCTTATTGTCCAC  
TGTAGCCTCCTC

>2769 len=132 tot-seq=3

AATCGCTTGAACCTAGGAGGCAGAGGCTGCAGTGAGCCGAGATTGCACCACTACACTCCA  
GCCTGGATAACAGAGTGAGACTCCACCTAAAACAAAAAAGAAAAAAGAAAAAAGCCT  
TCTCCTGTACCC

>2770 len=133 tot-seq=3

GACAGAGATGATCAGATTTACATTTTAGACAGCACTTTCATCTGCAGCATGCAAATATA  
GGAAAGGCCAATTTAGAGGCAGGAGGACAGTGGGAAGCACGTCATCATGGGCCAGGTGA  
GGGGTGTGATGC

>2771 len=133 tot-seq=3

GGGAAGAATTCACAAAGGTACAATATCTGAGTTGGTACACAATCAGTTCATGGTTACTGA  
TGGATAAATATCTTGCATGGCCTTCTGCAAAACCTGGGCTGACATCTTTTCTCCAGTG  
ACTGCCTTCTCC

>2772 len=133 tot-seq=3

AGTGCCCTGAGTCGGAGGAGCCTGGGGAGGGGGAGAGGGAGCTTTGGCTCCGGATTGGAG  
AGAGTCATGGATGTCCTCCCTTCTGAGGGGACATGGAGAACGGGCAGCTACATGGAGAA  
TGGGCAGCTGAGC

>2773 len=133 tot-seq=3

GTGGACCCAGCTTTGGTAGACTTGACTAATGGACTACCTGTCTACTCTACCCTTGGGGC  
TCTGCCCTGAGAAATGACTTTGGCAGCTGAGCTCAGAGAGGGAGGCCAGACGCAATGGTT



CATGCATGTAATC

>2774 len=133 tot-seq=3

ATTAAGTCATAGTAAGGGACAATATTCAGGTTTAGGTGTCAACGTTATTTGTCTCAACAT  
GTAGATGTCCTAACTGAAGCATGGGAAGGCATAGGCTATGCTTACCCCAAGCAGACCAT  
GCCCAGGGCCAAG

>2775 len=134 tot-seq=3

GTGTACAGATGAAAATAGTCTGTAAGAATATCGTAGGCCAGTTAGCGCCCCATAAGTGTT  
CATTTGTTTGGGGTTATAAAAAGCATCAGCAAGGATTTCCAGGAAAAAGAAATGCAGAT  
CTTTCTGCTTCCTG

>2776 len=134 tot-seq=3

TAGGGAATCTTCGGCAATGGGGGAAACCCTGACCGAGCAACGCCGCGTGATTTAGAAGGC  
CTTCGAGTTGTAAAATCTTTTGTATGGGAAGAAAATGACAGTACCATACGAATAAGGAC  
CGGCTAATTACGTG

>2777 len=134 tot-seq=3

TAGGGAATCTTCCACAATGGGGGAAACCCTGATGCAGCGACGCCGCGTGATTTAGAAGGC  
CTTCGGGTTGTAAAATCTTTTGTATAGGAAGAAAATGACAGTACTATACGAATAAGGAC  
CGGCTAATTACGTG

>2778 len=134 tot-seq=3

TGGGGAAATTTGCACAATGGGGGAAACCCTGATGCAGCGACGCCGCGTGATTTAGAAGGC  
CTTCGGGTTGTAAAATCTTTTGTATAGGAAGAGTTTGACAGTACTATACGAATAAGGTC  
CGGCTAAATACGTG

>2779 len=134 tot-seq=3

TAGGGAATATTGCTCAATGGGGGAAACCCTGAAGCAGCAACGCCGCGTGGAGGATGAAGGT  
TTTCGGATTGTAAACTCCTTTTATTAGAGAAGATAATGACGGTATCTAACGAATAAGCAC  
CGGCTAACTCCGTG

>2780 len=135 tot-seq=3

TAGGGAATCTTCGCAATGGGCGAAAGCCTGACGGAGCAACGCCGCGTGAGTGAAGAAGT  
ATTCGGTATGTAAAGCTCTATCAGCAGGGAAGATAATGACGGTACCTGACTAAGAAGCT  
CCGGCTAAATACGTG

>2781 len=135 tot-seq=3

TGGGGAATTTTGGACAATGGGCGCAAGCCTGATCCAGCAATGCCGCGTGAGTGAAGAAGT  
ATCTCGGTATGTAAAGCTCTATCAGCAGGGAAGAAAATGACGGTACCTGACTAAGAAGCC  
CCGGCTAACTACGTG

>2782 len=135 tot-seq=3

TAGGAAATCTTCCACAATGGACGCAAGTCTGATGGAGCAACGCCGCGTGAGTGAAGAAGG  
CTTTCGAGTCGTAAAGCCCTGTCTATGAGAAGATAATGACGGTATCATAGGAGGAAGCC  
CTGGCTAAATACGTG

>2783 len=135 tot-seq=3

GCGCGCAAATTACCCAATTCGATACGGAGAGGTAGTGACAATAAATACTGATACAGGGC  
TCTTTTGGGTCTTGTAATTGGAATGAGTACAATTTAAACCTCTTAACGAGGAACAATTGG  
AGGGCAAGTCTGGTG

>2784 len=135 tot-seq=3

TGAGGAATATTGGGCAATGGGCGCAAGCCTGACCCAGCAACGCCGCGTGAAGGAAGACGG  
TTTTCGGATTGTAAACTTCTTTTAAGAGGGACGATAATGACGGTACCTCTTGAATAAGCC  
ACGGCTAACTACGTG

>2785 len=135 tot-seq=3

TAGGGAATTTTCCACAATGGGCGAAAGCCTGATGGAGCAACGCCGCGTGCAGGATGAAGG  
CCTTAGGGTTGTAAACTGCTTTTATCTGTGACGAATATGACGGTAGCAGATGAATAAGGA  
TCGGCTAACTCCGTG

>2786 len=135 tot-seq=3

TAGGGAATCTTCCACAATGGGCGCAAGCCTGATGGAGCAACACCGCGTGAGTGAAGAAGG  
ATTTTCGGTATGTAAAGCTCTATCAGCAGGGAAGAAAATGACGGTACCTGACTAAGAAGCC  
CCGGCTAACTACGTG

>2787 len=135 tot-seq=3

TAGGGAATCTTCGGCAATGGGGGCAACCCTGATGCAGCGACGCCGCGTGGAGGAAGAAGG  
TCTTCGGATTGTAAACTCCTGTTGTTGAGGAAGATAATGACGGTACTCAACAAGGAAGTG  
ACGGCTAACTACGTG

>2788 len=135 tot-seq=3

TGGGGGATATTGCACAATGGGGGAAACCCTGATGCAGCGACGCCGCGTGGGTGAAGAAGC  
GCTCCGGCGCGTAAAGCCCTGTCAGCAGGGAAGAAGGTGACGGTACCTGACCAAGAAGCC  
CCGGCTAACTACGTG

>2789 len=135 tot-seq=3

TGGGGAATATTGCACAATGGGGGAAACCCTGATGCAGCGACGCCGCGTGAGCGAAGAAGG  
CTTTCGAGTCGTAAAGCTCTGTCCTATGAGAAGATAATGACGGTACCTACAGAAGAAGCA  
ACGGCTAAATACGTG

>2790 len=135 tot-seq=3

TGGGGAATATTGCACAATGGGGGAAACCCTGATGCAGCGACGCCGCGTGAGTGAAGAAGT  
ATCTCGGTATGTAAAGCTCTATCAGCAGGAAAGATAACGACGGTACCTGACCAAGAAGCC  
CCGGCTAACTACGTG

>2791 len=135 tot-seq=3

TGGGGGATATTGCACAATGGGGGAAACCCTGATGCAGCGACGCCGCGTGAGGGAAGAAGG  
TTTTCGGATTGTAAACCTCTGTCCTCAGTGACGATAATGACGGTAGCTGAGGAGGAAGCC  
ACGGCTAACTACGTG

>2792 len=135 tot-seq=3

TGAGAATATTGCACAATGGGGGAAACCCTGATGCAGCAACGCCGCGTGGGTGAAGAAGT  
ATTTCCGGTATGTAAAGCCCTATCAGCAGGGAAGAGAATGACGGTACCTGACTAAGAAGCC  
CCGGCTAACTACGTG

>2793 len=135 tot-seq=3

TTAGGAATTTCCACAATGGGCGCAAGCCTGATGGAGCAACGCCGCGTGCAGGATGAAGG  
CCTTAGGGTTGTAAACTGCTTTTATACGTGAAGAATATGACGGTAGCGTATGAATAAGGA  
TCGGCTAACTCCGTG

>2794 len=135 tot-seq=3

TGGGGAATATTGCACAATGGGGGAAACCCTGATGCAGCGACGCCGCGTGGGCGATGGAGT  
ATTTCCGGTATGTAAAGCCCTATCGGCAGGGAAGAAAATGACAGTACCTGACTAAGAAGCC  
CCGGCTAACTACGTG

>2795 len=135 tot-seq=3

TGGGGAATATTGCACAATGGGGGAAACCCTGATGCAGCGACGCCGCGTGAACGAAGAAGG

TATTCGTATCGTAAAGTTCTGTCCTACGGGAAGATAATGACAGTACCATAGAAGAAAGCC  
ACGGCTAACTACGTG

>2796 len=135 tot-seq=3

TAGGGAATCTTCGGCAATGGGCGCAAGCCTGATCCAGCCATGCCGCGTGAGTGATGAAGG  
CCTTAGGGTTGTAAAGCTCTTTCACCGGAGAAGATAATGACGGTATCCGGAGAAGAAGCC  
CCGGCTAACTTCGTG

>2797 len=135 tot-seq=3

TGGGGAATATTGCACAGTGGGGGAAACCCTGATGCAGCGACGCCGCGTGGGTGAAGAAAT  
GTTTCGGCATGTAAAGCCCTATCAGCAGGGAAGAAAATGACGGTACCTGACTAAGAAGCC  
CCGGCTAACTACGTG

>2798 len=135 tot-seq=3

TGGGGAATATTGCACAATGGGGGGAACCCTGATGCAGCGACGCCGCGTGGGTGAAGGAGT  
ACTTCGGTACGTAAAGCCCTATCAGCAGGAAAGAAAATGACGGTACCTGACTAAGAAGCC  
CCGGCTAACTACGTG

>2799 len=135 tot-seq=3

TAGGGAATCTTCCACAATGGACGCAACTCTGATGCAGCGACGCCGCGTGAACGAAGAAGG  
CTTTCGAGTCGTAAAGTTCTTTTATATGGGAAGATAATGACGGTACCATAAGAAAAAGCC  
CCGGCTAACTACGTG

>2800 len=135 tot-seq=3

TGGGGAATATTGCACAATGGGCGCAAGCCTGATGCAGCAACGCCGCGTGAACGATGAAGG  
TCTTCGGATCGTAAAGTTCTGTTGCAGGGGAAGATAATGACAGTACCATAGAAGAAAGCT  
CCGGCTAAATACGTG

>2801 len=135 tot-seq=3

TGGGGGATATTGCACAATGGGGGGAACCCTGATGCAGCAACGCCGCGTGAGGGAAGAAGG  
TTTTCGGATTGTAAACCTCTGTCCTTGGTGAAGATAATGACGGTAGCCGAGGAGGAAGCT  
CCGGCTAACTACGTG

>2802 len=135 tot-seq=3

TGGGGAATATTGGACAATGGGGGCAACCCTGATCCAGCAATGCCGCGTGAGTGATGAAGG  
CCTTAGGGTTGTAAAGCTCTTTTACCAGGGACGATGATGACGGTACCTGGAGAATAAGCC

CCGGCTAACTTCGTG

>2803 len=135 tot-seq=3

TGGGGAATATTGCACAATGGGGGAAACCCTGATGCAGCGACGCCGCGTGAGCGAAGAAGG

CTTCGAGTCGTAAAGCTCTGTCCTATGAGAAGATAATGACGGTATCATACGAATAAGGA

CCGGCTAATTCCGTG

>2804 len=135 tot-seq=3

TGGGGAATATTGCACAATGGGCGCAAGCCTGATGCAGCAACGCCGCGTGAACGATGAAGG

TCTTCGGATCGTAAAGTTCTGTTGCAGGGGAAGATAATGACGGTATCATAGGAGGAAGCC

CTGGCTAAATACGTG

>2805 len=135 tot-seq=3

TGGGGAATATTGCGCAATGGGGGAAACCCTGACGCAGCGACGCCGCGTGAGTGAAGAAGT

ATTCGGTATGTAAAGCTCTATCAGTAGGGAAGATAATGACGGTACCTACATAAGAAGCC

CCGGCTAAATACGTG

>2806 len=135 tot-seq=3

CTGGAGCAGAAGTGAGCAGAGAGCAGCTTTGGCTTCTGGGCCCTGGCTGGGAGAGCGGG

GCTGCCTGGGTAAAGGAGCCCCCTCCTCCAAGTCAAGAGGCCCTGGATCCTGACCCTGGC

CGCCAGCGGCCTGA

>2807 len=135 tot-seq=3

TGGGGAATCTTGCACAATGGGGGAAACCCTGATGCAGCAACGCCGCGTGAGCGATGAAGG

CCTTCGGGTCGTAAAGCTCTGTCCTCAAGGAAGATAATGACGGTACTTGAGGAGGAAGCC

CCGGCTAACTACGTG

>2808 len=135 tot-seq=3

TGGGGAATTTTCGACAATGGGCGCAAGCCTGATGCAGCGACGCCGCGTGAGCGATGAAGG

TCTTCGATTGTAAAGCTCTGTCCTGGGTGAAGATAATGACGGTAATCCAGGAGGAAGCC

CCGGCTAACTACGTG

>2809 len=135 tot-seq=3

TGGGGAATTTTTCGACAATGGGGGAAACCCTGACGCAGCAACGCCGCGTGCGGGACGAAGG

CCTTCGGGCTGTAAACCGCTTTCAGCAGGGAAGACTTTGACGGTACCTGCAGAAGAAGCT

CCGGCTAACTACGTG

>2810 len=135 tot-seq=3

TGGGGAATATTGGACAATGGGCGAAAGCCTGATCCAGCGACGCCGCGTGAAGGATGAAGT  
ATTCGGTATGTAACTTCTATCAGCAGGGAAGAAGATGACGGTACCTGACTAAGAAGCC  
CCGGCTAACTACGTG

>2811 len=135 tot-seq=3

AGGCGGAGGGAGCAACGCCGCGGGAGGGAAGAAGGGGGGCGGAGCGGAAAGCTCTGGGGT  
TGGTGAAGAAGGATAGAGGTAGTAACTGGCCTTTATTTGACGGTAATCAACCAGAAAGTC  
ACGGCTAACTACGTG

>2812 len=135 tot-seq=3

TGGGGAATATTGGACAATGGGCGAAAGCCTGATCCAGCAATACCGCGTGAATGATGAAGG  
CCTTAGGGTTGTAAAGTTCTTTTAGTTGGAAAGATAATGACGGTACCAACAGAAAAAGCC  
CCGGCTAACTCCGTG

>2813 len=135 tot-seq=3

TGGGGAATTTTGCGCAATGGGGGGAACCCTGACGCAGCAACGCCGCGTGCGGGATGAAGG  
CCTTCAGGTTGTAAACCGCTTTCAGCAGGGAAGATAGTGACGGTACCTGCAGAAGAAGCC  
CCGGCTAACTACGTG

>2814 len=135 tot-seq=3

TGGGGAATTTTGCACAATGGGGGAAACCCTGATGCAGCGACGCCGCGTGAATGATGAAGG  
TCTTCGGATTGTAAATTCTGTCCTTAGCGAAGGTAATGACAGTAGCTAAGAAGCAAGCC  
CTGGCTAAATACGTG

>2815 len=135 tot-seq=3

TGAGGAATATTGGTCAATGGGGGAAACCCTGATGCAGCGACGCCGCGTGAGCGAAGAAGG  
TTTTCGAATCGTAAAGCTCTGTCCTATGGGAAGATAATGACGGTACCATAGGAGGAAGCC  
CCGGCTAACTACGTG

>2816 len=135 tot-seq=3

TGGGGAATATTGCACAATGGGCGAAAGCCTGATGCAGCGACGCCGCGTGAAGGATGAGGT  
ATTCGGTATGTAACTTCTATCAGCAGGGAAGAAAATGACGGTACCTTACTAAGAAGCT  
CCGGCTAAATACGTG

>2817 len=135 tot-seq=3

TGGGGAATTTTGCACAATGGAGGAACTCTGATGCAGCGACGCCGCGTGAGCGAAGAAGT  
ATTCGGTATGTAAAGCTCTATCAGAAGGGAAGAAAATGACGGTACCTTACTAAGAAGCT  
CCGGCTAAATACGTG

>2818 len=135 tot-seq=3

TGGGGAATACTGCACAATGGGGGAAACCCTGATGCAGCGACGCCGCGTGAGCGAAGAAGT  
ACCTCGGTATGTAAAGCTCTATCAGCAGGGAAGAAAGTGACAGTACCTGACTAAGAAGCC  
CCGGCTAACTACGTG

>2819 len=135 tot-seq=3

TGGGGAATATTGCGCAATGGGGGAAACCCTGACGCAGCCATGCCGCGTGAGTGATGAAGG  
CCTTAGGGTTGTAAAGCTCTTTCACCGGAGAAGATAATGACGGTATCCGGAGAAGAAGCC  
CCGGCTAACTTCGTG

>2820 len=135 tot-seq=3

TGGGGAATATTGCACAATGGGGGAAACCCTGATGCAGCGACGCCGCGTGGGTGAAGAAGT  
ACTTCGGTACGTAAAGCCCTATCAGCAGGGAAGAAGATGACGGTACCTGATTAAGAAGCC  
CCGGCTAACTACGTG

>2821 len=135 tot-seq=3

TGAGGAATATTGGGCAATGGAGGCAACTCTGACCCAGCCATGCCGCGTGAGTGAAGAAGG  
TTTTCGGATTGTAAAGCTCTTTCGCACGGGACGATGATGACGGTACCGTGATAAGAAGCC  
CCGGCTAACTTCGTG

>2822 len=135 tot-seq=3

TGAGGAATATTGGGCAATGGAGGAACTCTGACCCAGCCATGCCGCGTGAGTGAAGAAGG  
TTTTCGAATTGTAAAGCTCTTTCGGATGTGAAGATGATGACGGTAACATCTAAAGAAGCC  
CCGGCAAACCTTCGTG

>2823 len=136 tot-seq=3

CCTTCGTATCCCCAGGTCCTTTCACATTCCTCAGAGAGATGACTAATGCCAAGAGTGTG  
AGACCCTCAGTGGCAAAGGTGAGTTGGTGCGGCTCCTTTCACATGGATCGGAGCCTGGA  
GGAAACCACTTCCTTC

>2824 len=136 tot-seq=3

TGGGGAATCTTGCAGCAATGGGGGCAACCCTGACGCAGCGACGCCGCGTGCGGGATGAAGG

CTCTAGGGTCGTAAACCGCTTTCAGCAGGGAAGAGACAAGACTGTACCTGCAGAAGAAGC  
CCCGGCTAACTACGTG

>2825 len=136 tot-seq=3

TGGGGAATATTGCGCAATGGGCGAAAGCCTGACGCAGCGACGCCGCGTGAGGGATGAAGG  
CCTTCGGGTTGTAAACCTCTTTCAGCAGGAACGAATTCAGACGGTACCTGCAGAAGAAGC  
ACCGGCTAACTACGTG

>2826 len=136 tot-seq=3

GCGCGCAAATTACCCACTCCCGACCCGGGGAGGTAGTGACGAAAATAACAATACAGGAC  
TCTTTCAAACCTATAATTAATAAATCCACTTTAAATCCTTTAACGAGGATCCATTG  
GAGGGCAAGTCTGGTG

>2827 len=136 tot-seq=3

TGGGGAATATTACACAATGGGGGAAACCCTGATGCAGCGACGCCGCGTGAGCGATGAAGT  
ATTTCCGGTATGTAAAGCTCTATCAGCAGGGAAGAATTAGGACGGTACCTGACTAAGAAGC  
ACCGGCTAAATACGTG

>2828 len=136 tot-seq=3

GCGCGCAAATTACCCACTCCCGACCCGGGGAGGTAGTGACGAAAATAACAATACAGGAC  
TCTTTGAGGTCCTGTAATTGGAATGAGTCCACTTTAAGTCCTTTAATGAGGATCCATTG  
GAGGGCAAATCTAGTG

>2829 len=136 tot-seq=3

TGGGGAATATTGCACAATGGGGGAAACCCTGATGCAGCGACGCCGCGTGAGGGAAGAAGG  
TTTTCGGATTGTAAACCTCTGTCTTTGGTGACGAAAGATGACGGTAGCCAAAGAGGAAGC  
TACGGCTAACTACGTG

>2830 len=136 tot-seq=3

TGGGGAATCTTCGCAATGGACGAAAGTCTGACGGAGCAACGCCGCGTGAACGATGACGG  
CCTTCGGGTTGTAAAGTTCTGTTATACGGGGAAGATAATGACGGTACCCTGTGAGGAAGC  
CCCGGCTAACTACGTG

>2831 len=136 tot-seq=3

TGGGGGATATTGCACAATGGGGGAAACCCTGATGCAGCAACGCCGCGTGAGGGAAGACGG  
TCTTCGGATTGTAAACCTAAGTTGTCAGGGACGAATTATGACGGTACCTGAAGAGAAAGC



TCCGGCTAACTACGTG

>2832 len=136 tot-seq=3

TCGGGAATATTGCGCAATGGAGGAACTCTGACGCAGTGACGCCGCGTATAGGAAGAAGG

TTTTCGGATTGTAACTATTGTCTGCAGGGGAGAAAAAAGACTGTACCTGCAAAGAAAGC

TCCGGCTAACTACGTG

>2833 len=136 tot-seq=3

TAAAGAATCTTCCACAATGGACGAAAGTCTGATGGAGCAATACCGCGTGGGTGATGAATG

TCGAAAGATTGTAAACCCTTTTCTGAGGGAAGAATTATGACGGTACCTCAGGAATAAGC

ACCGGCTAACTCCGTG

>2834 len=136 tot-seq=3

TAAGGGATATTGCGCAATGGGCGAAAGCCTGACGCAGCAACGCCGCGTGAAGGATGAAGG

CCTTCGGGTCGTAACTTTTTTTGACGCTGACGAGGAAGGACGGTAGGCGTCAATAAGC

CACGGCTAACTACGTG

>2835 len=137 tot-seq=3

TGGGGAATATTGGACAATGGGGGAAACCCTGATCCAGCGACGCCGCATGAGTGAAGAAGT

ATTTCCGGTATGTAAAGCTCTATCAGCATGGAAGAAGAAATGACGGTACCTGAGTAAGAAG

CCTCGGCTAACTACGTG

>2836 len=137 tot-seq=3

TGGGGAATATTGGGCAATGGGGGAAACCCTGACCCAGCAACGCCGCGTGAAGGAAGAAGG

TCTTCGGATCGTAACTTCTATCCTCGGTGAAGAGGAGAAGACGGTAGCCGAGAAGGAAG

CCCCGGCTAACTACGTG

>2837 len=137 tot-seq=3

TGGGGGATATTGCACAATGGGGGAAACCCTGATGCAGCGACGCCGCGTGGGCGAAGAAGT

ATTTCCGGTATGTAGAGCCCTATCAGCAGGGAAGAAGAAATGACGGTACCTGAGTAAGAAG

CACCGGCTAAATACGTG

>2838 len=137 tot-seq=3

TGGGGAATATTGGGCAATGGGCGCAAGCCTGACCCAGCAACGCCGCGTGAAGGAAGGAGG

CCTTCGGGTTGTAACTTCTTTTGTCTGGGGACGAGTAGAAGACGGTACCTGGCGAATAAG

CCACGGCTAACTACGTG

>2839 len=137 tot-seq=3

TGGGGAATATTGCACAATGGGCGAAAGCCTGATGCAGCAACGCCGCGTGAGTGAAGAAGG  
TCTTCGGATTGTAAACTCTGTCCTTGGGGAAGAACAAATGACGGTACCCTTGGAGGAAG  
CCCCGGCTAACTACGTG

>2840 len=137 tot-seq=3

TGACATTGTTTCATGAGATGAAAAATGAAAAAAAAACAAGACTCAGAAGGCTCAATAACTT  
CCCAAATTCACAGAGCCAGTGTGTGGCAGGGCTGTGAGCAAGACCACATCTGCTGGATCT  
CAAAGCCCAGGTGTCTT

>2841 len=137 tot-seq=3

TGGGGAATATTGGGCAATGGACGCAAGTCTGACCCAGCAACGCCGCGTGAAGGAGGAAGG  
CTTTCGGGTTGTAAACTTCTTTTGTGTCAGGGAACAGTAGAAGAGGGTACCTGACGAATAAG  
CCACGGCTAACTACGTG

>2842 len=137 tot-seq=3

TGGGGAATATTGGGCAATGGGCGAAAGCCTGACCCAGCGACGCCGCGTGAAGGAAGAAGG  
TCTTCGGATTGTAAACTTCTTTTATTAGGGACGAACAGATGACGGTACCTAATGAATAAG  
CCACGGCTAACTACGTG

>2843 len=138 tot-seq=3

TAGGGAATATTGCACAATGGAGGAAACTCTGATGCAGCGACGCCGCGTGAGTGATGAAGG  
CCTTCGGGTCGTAAAGCTCTATCGCATGGGAATAACACAATGAATGTACCATGCAAGAAA  
GGATCGGCTAACTTCGTG

>2844 len=138 tot-seq=3

TAGGGAATATTGCGCAATGGGCGAAAGCCTGACGCAGCGACGCCGCGTGAGTGATGAAGG  
CCTTCGGGTCGTAAAGCTCTGTTGTACGGGAAAAAGAAAGTGATGGTACCGTATAAGAAA  
GGAACGGCTAACTTCGTG

>2845 len=138 tot-seq=3

TGGGGAATTTCCGCAATGGGCGAAAGCCTGACGGAGCAATACCGCGTGAGGGAGGAAGG  
CTCTGGGTTGTAAACCTCTTTTCTCAAGGAATAAGAAAGTGAGGGTACTTGAGGAATAA  
GCATCGGCTAACTCCGTG

>2846 len=138 tot-seq=3

TAGGGAATCTTCGGCAATGGACGGAAGTCTGACCGAGCAACGCCGCGTGAGTGAAGAAGG  
TTTTCGGGTTGTAAAGCACTTTCGGAGGGGAGGAAAAAATGACGTTACCCTCAGAAGAA  
GCACCGGCTAACTCCGTG

>2847 len=138 tot-seq=3

TGGGGAATATTGCACAATGGGGGAAACCCTGATGCAGCAACGCCGCGTGAAGGAAGAAGA  
TCTTCGGATCGTAAACTTCTGTCTTAGGGAAGAAAAAATGACGGTACCTAAGGAGGAA  
GCCCCGGCTAACTACATG

>2848 len=138 tot-seq=3

TGGCTTTGCTTATGGAGGTGGCATTGGAGGGGGCTTTGGTGGCCCTGGCTTCTGTCTG  
TCCCTCTGGAGGCATTCAGGAAGTACTGTCAACCAGAGCCTCCTGACTCCCCTCAACCT  
GCAAATCGACCCCACTAT

>2849 len=138 tot-seq=3

TGGGGAATATTGCGCAATGGGGGAAACCCTGACGCAGCGACGCCGCGTGTGTGAAGAAGG  
TTTTAGGACTGTAAAACACTTTTAGTAGGGAAGAAAAAATGACGGTACCTACAGAAGAA  
GCAACGGCTAAATACATG

>2850 len=138 tot-seq=3

TGGGGAATATTGCACAATGGGGGAAACCCTGATGCAGCAACGCCGCGTGAAGGAAGAAGG  
GTTTCGGCTCGTAAACTTCTATCAACGGGGAAGAAAAAATGACGGTACCCGAATAAGAA  
GCACCGGCTAACTACGTG

>2851 len=138 tot-seq=3

TGGGGGATATTGCACAATGGGGGAAACCCTGATGCAGCGACGCCGCGTGAGTGAAGAAGT  
ATTTCCGGTATGTAAAGCTCTATCAGCAGGGAAGAAAGAAATGACGGTACCTGAATAAGAA  
GCCCCGGCTAACTACGTG

>2852 len=138 tot-seq=3

TAGGGAATCTTGCACAATGGGCGAAAGCCTGATGCAGCAACGCCGCGTGAAGGATGAAGG  
CCTTCGGGTTGTAAACTTCTGTTCTTAGGGAAGAAGAAAGTACGGTACCTAAGGAGAAA  
GCCCCGGCTAACTACGTG

>2853 len=138 tot-seq=3

TCGGGAATATTGGGCAATGGAGGAAACTCTGACCCAGCAACGCCGCGTGAAGGATGAAGG

TCCTCGGATTGTAACTTCTGTCCTATGGGAAGAATAAAATGACGGTACCATAGAAGAAA

TCTCCGGCAAACACTACGTG

>2854 len=138 tot-seq=3

TGGGGAATATTGCACAATGGGGGAAACCCTGATGCAGCGACGCCGCGTGAGTGAAGACGG

CCTTCGGGTTGTAAAGCTCTGTTTCGAGGGACGAAAACAATGACGGTACCTCGGGAGGAA

GCCACGGCTAACTACGTG

>2855 len=138 tot-seq=3

TGGGGAATATTGCACAATGGGGGAAACCCTGATGCAGCAACGCCGCGTGGAGGATGAAGG

ATTTTCGGTTCGTAACTCCTATCAACGGGGAAGAAAAAATGACGGTACCCGAATAAGAA

GCACCGGCTAACTACGTG

>2856 len=138 tot-seq=3

TGGGGGATATTGCACAATGGAGGAAACTCTGATGCAGCAACGCCGCGTGAGGGAAGAAGG

TTTTTCGGATTGTAAACCTCTGTTTTTAGTGAAGAAACAATGACGGTAGCTAAAGAGGAA

GCCACGGCTAACTACGTG

>2857 len=138 tot-seq=3

TGGGGAATATTGGGCAATGGGCGAAAGCCTGACCCAGCAATGCCGCGTGAACGAAGAAGG

TCTTCGGATTGTAAAGTTCTGTCCTATGTGAAGAAAAAATGACGGTAACATAGGAGGAA

GCCCCGGCTAACTACGTG

>2858 len=138 tot-seq=3

TGGGGAATCTTGCACAATGGGCGAAAGCCTGATGCAGCAACGCCGCGTGAGCGAAGAAGG

CCTTTGGGTCGTAAAGCTCTGTCCTAAGGGAAGAAGGAAGTACGGTACCTTAGGAGGAA

GCCCCGGCTAACTACGTG

>2859 len=138 tot-seq=3

TGGGGAATATTGCACAATGGGGGAAACCCTGATGCAGCGACGCCGCGTGAGTGAAGAAGT

AATTCGTTATGTAAAGCTCTATCAGCAGGGAAGAAAGAAATGACGGTACCTGACCAAGAA

GCCCCGGCTAACTACGTG

>2860 len=138 tot-seq=3

TAGGGAATCTTCGGCAATGGACGCAAGCCTGACCCAGCAACGCCGCGTGAAGGAAGAAGG

CTTTCGGGTTGTAACTTCTTTTCTCAGGGACGAAGCAAGTACGGTACCTGAGGAATAA

GCCACGGCTAACTACGTG

>2861 len=138 tot-seq=3

TGGGGAATATTGGGCAATGGACGGAAGTCTGACCCAGCGACGCCGCGTGAGGGAAGAAGG

TCTTCGGATTGTAAACCTTAGTAAGCAGGGAAGAAGGAAGTGACGGTACCTGCAGAGTAA

GCCACGGCTAACTACGTG

>2862 len=138 tot-seq=3

TGGGGAATATTGGGCAATGGGCGCAAGCCTGACCCAGCAATGCCGCGTGATGGATGAAGG

TTTTCGGACTGTAAACATCTTTTATCAGGGACGAAACAAATGACGGTACCTGATGAATAA

GCCACGGCTAACTACGTG

>2863 len=138 tot-seq=3

TGGGGAATATTGGGCAATGGGCGAAAGCCTGACCCAGCAATTCTGTGTGTGTGAAGAAGG

TTTTAGGACTGTAAACACTTTTAGTAGGGAAGAAAGAAATGACGGTACCTACAGAAGAA

GCGACGGCTAAATACGTG

>2864 len=138 tot-seq=3

TGGGGAATATTGCGCAATGGGGGCAACCCTGACGCAGCAACGCCGCGTGATTGATGAAGG

TCTTCGGATTGTAAAAATCTTTAATCAGGGACGAAGAAAATGACGGTACCTGAAGAATAA

GCTCCGGCTAACTACGTG

>2865 len=138 tot-seq=3

TGGGGGATATTGCACAATGGGGGAAACCCTGATGCAGCAACGCCGCGTGAGGTATGAAGG

CCTTTGGGTTGTAAAGCCTCTGTCCTAGGGGAAGAAAAAATGACGGTACCCGAGGAGGAA

GCCCCGGCTAACTACGTG

>2866 len=138 tot-seq=3

TGGGGAATATTGCACAATGGGGGAAACCCTGATGCAGCAACGCCGCGTGAAGGAAGAAGG

CCTTCGGGTTGTAAACTTCTGTCCTAGGGGAAGAAACAAATGACATTACCCTTGGAGGAA

GCCCCGGCTAACTACGTG

>2867 len=138 tot-seq=3

TGGGGGATATTGCACAATGGGCGAAAGCCTGATGCAGCGACGCCGCGTGAGGGAAGACGG

CCTTCGGGTTGTAAACCTCTGTCATTCGGGACGAAGAAAGTGACGGTACCGAAGAAGGAA

GCTCCGGTTAACTACGTG

>2868 len=138 tot-seq=3

TGGGGAATATTGGGCAATGGGCGAAAGCCTGACCCAGCAACGCCGCGTGAAGTATGAAGG  
CCTTCGGGTTGTAACTTCTTTGATCAGGGAAGAAACAAATGACGGTACCTTACTAAGAA  
GCTCCGGCTAAATACGTG

>2869 len=138 tot-seq=3

TGGGGAATTTTGCACAATGGGGGAAACCCTGACCCAGCAACGCCGCGTGAAGTATGAAGG  
CCTTCGGGTTGTAACTTCTTTGATCAGGGAAGAAACAAATGACGGTACCTGAAAAACAA  
GCCACGGCTAACTACGTG

>2870 len=139 tot-seq=3

CGCAAGCCTGATGGAGCAACGCCGCGTGAGTGAAGAAGGGTTTCGGCTCGTAAAGCTCTG  
TTGTTGGAGAAGAACGTGCGAGGTAGTAACTGTTACGAAGTGACGGTAACCAACCAGAA  
AGTCACGGCTAACTACGTG

>2871 len=139 tot-seq=3

TGGGGAATATTGGACAATGGACCGAGAATCTGATCCAGCAATTCTGTGTGCACGATGAAG  
TTCTTCGGAATGTAAAGTGCTTCCAGTTGGGAAGAAAGAAATGACGGTACCAACAGAAGA  
AGTGACGGCTAAATACGTG

>2872 len=139 tot-seq=3

CTATATGCAGGTGGGGAGTGTGTTCTTTGGCCTCAAGTGTTGCTGTACGTGAGGTAGCC  
TATCCTCGGGGTGCTTATGAATGTGTGGTGGCTTTGCTGCTAGGGGAAGCAGCGTGGCTG  
CCAGTGGCTTGCCCTTTGG

>2873 len=140 tot-seq=3

TGGGGAATATTGTGCAATGGGGGAAACCCTGACGCAGCGACGCCGCGTGCGGGATGAAGG  
CCTTCGGGTTGTAACTCCTTTCGTCAGGGACGAAGTTTGTGTTGACGGTACCTGGATAAG  
AAGCACCGGCTAACTACGTG

>2874 len=140 tot-seq=3

TGGGGAATATTGCACAATGGGCGCAAGCCTGATGCAGCGACGCCGCGTGAGGGATGACGG  
CCTTCGGGTTGTAACTCCTTTCACCAGGGACGAAGAGAAATTGACGGTACCTGGGGAAG  
AAGCACCGGCCAACTACGTG

>2875 len=140 tot-seq=3

TGGGGAATATTGCACAATGGGCGGAAGCCTGATGCAGCGACGCCGCGTGGGGGATGACAG  
CCTTCGGGTTGTAAACCTCTTTCAGCAGGGAAGAAGCGAGAGTGACGGTACCTGCAGAAG  
AAGCGCCGGCTAACTACGTG

>2876 len=140 tot-seq=3

ACGCAAGTCTGATGGAGCAACGCCGCGTGAGTGAAGAAGGGTTTCGGCTCGTAAAGCTCT  
GTTGTTGGTGAAGAAGGACAGGGGTAGTGGCGGGGCTTTAAATGACGGTAATCAATTAGA  
AAGTCACGGCTAACTACGTG

>2877 len=140 tot-seq=3

TGGGGAATATTGCACAATGGGCGCAAGCCTGATGCAGCGACGCCGCGTGCGGGATGACGG  
CCTTCGGGTTGTAAACCGCTTTTGATCGGGAGCAAGCGAGAGTGAGTTTACCCGTTGAAT  
AAGCACCGGCTAACTACGTG

>2878 len=140 tot-seq=3

TGGGGAATATTGCGCAATGGGCGGAAGCCTGACGCAGCGACGCCGCGTGGGGGATGACGG  
CCTTCGGGTTGTAAACCTCTTTCGACCGGGACGAAGCGAGAGTGACGGTACCGGTATAAG  
AAGCACCGGCCAACTACGTG

>2879 len=140 tot-seq=3

TGGGGAATATTGCGCAATGGGGGAAACCCTGACGCAGCGACGCCGCGTGGGGGATGACGG  
CCTTCGGGTTGTAAACTCCTTTCACCATCGACGAAGGTTTTCTGACGGTAGATGGAGAAG  
AAGCACCGGCTAACTACGTG

>2880 len=140 tot-seq=3

TGGGGAATATTGCACAATGGGCAGAAGCCTGATGCAGCAACGCCGCGTGCGGGATGACGG  
CCTTCGGGTTGTAAACCGCTTTCAGCAGGGACGAAGCTAACGTGACGGTACCTGCAGAAG  
AAGCACCGGCTAACTACGTG

>2881 len=140 tot-seq=3

TGGGGAATATTGCACAATGGGCGAAAGCCTGATGCAGCAACGCCGCGTGCGGGATGACGG  
CCTTCGGGTTGTAAACCGCTTTCACCCATGACGAAGCTAACGTGACGGTAGTGGGAGAAG  
AAGCACCGGCTAACTACGTG

>2882 len=140 tot-seq=3

TGGGGAATATTGCGCAATGGGCGAAAGCCTGACGCAGCGACGCCGCGTGAGGGATGACGG

CCTTCGGGTTGTAAACCTCTTTCAGCTCTGACGAAGCGAGAGTGACGGTAGGAGCAGAAG  
AAGCACCGGCCAACTACGTG

>2883 len=140 tot-seq=3

TGGGGAATATTGGACAATGGGCGGAAGCCTGATCCAGCAACGCCGCGTGAGGGATGACGG  
CCTTCGGGTTGTAAACCTCTTTCGCTGTGACGAAGCGCAAGTGACGGTAACAGGTAAAG  
AAGCACCGGCCAACTACGTG

>2884 len=140 tot-seq=3

TGGGGAATATTGCGCAATGGGCGGAAGCCTGACGCAGCGACGCCGCGTGGGGGATGACGG  
CCTTCGGGTTGTAAACCTCTTTCGCCAGGGACGAAGAGCAATTGACGGTACCTGGAGAAG  
AAGCACCGGCCAACTACGTG

>2885 len=141 tot-seq=3

TGGGGAATATTGCACAATGGGCGCAAGCCTGATGCAGCGACGCCGCGTGGGGGATGACGG  
CCTTCGGGTTGTAAACTCCTTTCGCCAAGGACGAAGAGAGTATTGACGGTACTTGGAGAA  
GAAGCACCGGCTAACTACGTG

>2886 len=141 tot-seq=3

AGAAAGGCAAAGCCCAAAGCAAACAAATCCAAAAAAGATGCAAGAAGTGAAGAAAGAAA  
TATTCAAGGAAAAAGCATAAAGAAAAAATCCTCAGGAAACATTGGACACACTTATAGAAA  
TGCAAAATGCTCTGGAAAGTC

>2887 len=141 tot-seq=3

TGGGGAATATTGCGCAATGGGGGAAACCCTGACGCAGCGACGCCGCGTGGGGGAATGAAG  
GTCTTCGGATTGTAAACCCCTGTCATGTGGGAGCAAATTA AAAAGATAGTACCACAAGAG  
GAAGAGACGGCTAACTCTGTG

>2888 len=142 tot-seq=3

CAGCCCGAGGAGTTGAATGAAAAGGCACAGTGGAGACTTCCAACCATGCAGCTAGCAGCT  
CATCCCAGCTCTGAGCAGCTGCCATCCATGGCTTCTAACCATGATTTCCACCTCTCTCT  
GCATCCCATCCACACAGCAGGC

>2889 len=142 tot-seq=3

TAGGGAATGGACCACAATGGAAGAAAGTCTGATGGAGAAACGCCGCGAGAGTGAAGAAGG  
TTTTCGGATGGTAAAGCTCTGTTGTTGGTGAAGAAGGATAGAGGTAGTAACTGGCCTTTA



TTTGACGGTAATCAACCAGAAA

>2890 len=142 tot-seq=3

TAGGGAATATTGCACAATGGAGGAACTCTGATGCAGCCATGCCGCGTGTGTGAAGAAGG  
CCTTCGGGTTGTAAACCGCTTTTGATTGGGAGCAAGCTTTCGGGTGAGTGTACCTTTCGA  
ATAAGCGCCGGCTAACTACGTG

>2891 len=142 tot-seq=3

TGGGGAATATTGCGCAATGGGGGAAACCCTGACGCAGCGACGCCGCGTGATTTAGAAGGC  
CCTTCGGGTTGTAAACCGCTTTTGATTGGGAGCAAGCCTTTTGGGTGAGTGTACCTTTCGA  
ATAAGCGCCGGCTAACTACGTG

>2892 len=142 tot-seq=3

TGGGGAATATTGCACAATGGAGGGAACTCTGATGCAGCGACGCCGCGTGAGTGATGAAGG  
CCTTCGGGTTGTAAACCGCTTTTGATTGGGAGCAAGCTTTCGGGTGAGTGTACCTTTCGA  
ATAAGCGCCGGCTAACTACGTG

>2893 len=142 tot-seq=3

TGGGGAATATTGCACAATGGGCGGAAGCCTGATGCAGCAACGCCGCGTGCGGGATGACGG  
CGTTCGGGTTGTAAACCGCTTTTGATTGGGAGCAAGCCTTCGGGTGAGTGTACCTTTCGA  
ATAAGCGCCGGCTAACTACGTG

>2894 len=142 tot-seq=3

TAGGGAATTTTTACAATGGGCGCAAGCCTTATGAAGCAATGCCGCGTGAACGATGAAGG  
TCTTCGGGTTGTAAACCGCTTTTGATTGGGAGCAAGCTTTCGGGTGAGTGTACCTTTCGA  
ATAAGCGCCGGCTAACTACGTG

>2895 len=142 tot-seq=3

TAGGGAATCTTCGGCAATGGGGGAAACCCTGACCGAGCAACGCCGCGTGCGGGATGAAGG  
CCTTCGGGTTGTAAACCGCTTTCAGCAGGGACGAGGCCGCAAGGTGACGGTACCTGCAGA  
AGAAGCCCCGGCTAACTACGTG

>2896 len=142 tot-seq=3

TGGGGAATATTGACAATGGGCGAAAGCCTGATCCAGCCATGCCGCGTGTGTGAAGAAGG  
TCTTCGGGTTGTAAACCGCTTTTGATTGGGAGCAAGCTTTCGGGTGAGTGTACCTTTCGA  
ATAAGCGCCGGCTAACTACGTG

>2897 len=142 tot-seq=3

TGGGGAATATTGCGCAATGGGGGAAACCCTGACGCAGCGACGCCGCGTGAGGGATGGAGG  
CCTTCGGGTTGTAAGCCTCTTTTGTGGGAGCAAGCCTTCGGGTGAGTGTACCTTTCGA  
ATAAGCGCCGGCTAACTACGTG

>2898 len=142 tot-seq=3

TAGGGAATCTTCCACAATGGACGCAAGCCTGATGCAGCGACGCCGCGTGCGGGATGACGG  
CCTCCGGGTTGTAAACCGCTTTTGATCGGGAGCAAGCCTTCGGGTGAGTGTACCTTTCGA  
ATAAGCACCGGCTAACTACGTG

>2899 len=142 tot-seq=3

TAGGGAATCTTCCGCAATGGGCGAAAGCCTGACGGAGCAACGCCGCGTGCGGGATGAAGG  
CCTTCGGGTTGTAAACCGCTTTTGATTGGGAGCAAGCCTTCGGGTGAGTGTACCTTTCGA  
ATAAGCGCCGGCTAACTACGTG

>2900 len=142 tot-seq=3

CCACGTGGAACCTCGTGTCTCGAACACAGTGCGGTCTTCACACCTCAGCGCTGGGCATCGG  
GAGGCAGCCTTCATGTGATGCTACCCTATGAGGCCAGCAAGGGCTCCCGGGAATGAAAA  
CGGCAGCAGCCGGCACCCAGTC

>2901 len=143 tot-seq=3

AGGTAACAGCAGAGAATAAACCCCTATGCACAGATGCCGACCGGTGCCATGTTACCCTCTT  
GTTATTAACGCGTTCTCACGCCCGCCAGGAAGAACAACAACAGACCAGAATCTTCTGCG  
GCAAAACTTTATTGCTTACATCT

>2902 len=143 tot-seq=3

TGGGGAATATTGCGCAATGGGGGAAACCCTGATGCAGCGACGCCGCGTGGGGGATGACGG  
CCTTCGGGTTGTAAACTCCTTCGCAACTGACGAAGCTTTTTTGTGACGGTAGGTTGAG  
AAGAAGCACCGGCTAACTACGTG

>2903 len=143 tot-seq=3

TGAGGAATATTGGTCAATGGACGCAAGTCTGACGCAGCGACGCCGCGTGCGGGATGAAGG  
CCTTCGGGTTGTAAACCGCTTTTGATTGGGAGCAAGCCTTTTGGGTGAGTGTACCTTTCG  
AATAAGCGCCGGCTAACTACGTG

>2904 len=143 tot-seq=3

TGGGGAATATTGCACAATGGGCGCAAGCCTGATGCAGCGACGCCGCGTGGGGGATGACGG  
CCTTCGGGTTATAAACTCCTTCGCTAGGGAAGAAGCCTTTGGGTGACGGTACCTGGAT  
AAGAAGCACCGGCTAACTACGTG

>2905 len=143 tot-seq=3

TAGGGAATCTCCACAATGGACGAAAGTCTGATGGAGCAACGCCGCGTGAGTGAAGAAGG  
CCTTCGGGTTGTAAACCGCTTTTGATTGGGAGCAAGCCTTTGGGTGAGTGTACCTTTCG  
ATAAAGCGCCGGCTAACTACGTG

>2906 len=143 tot-seq=3

TGGGGGATATTGCACAATGGAGGCAACTCTGATGCAACAACGCCGCGTGCGGGATGAAGG  
CCTTCGGGTTGTAAACCGCTTTTGATTGGGAGCAAGCCTTTGGGTGAGTGTACCTTTCG  
ATAAAGCGCCGGCTAACTACGTG

>2907 len=143 tot-seq=3

TGGGGAATTTTGGACAATGGGGGCAACCCTGATCCAGCCATGCCGCGTGCAGGATGAAGG  
TCTTCGGATTGTAAACTGCTTTTGATTGGGAGCAAGCCTTTGGGTGAGTGTACCTTTCG  
ATAAAGCGCCGGCTAACTACGTG

>2908 len=143 tot-seq=3

GACGAGAATACTAGGCGCCATCATAAATTAACCTCTGCTCAGTGGCTAATCTCACGGGC  
GCCTCACAAAGACACAGACGGACTGCCTACAGCTCACTCGCGGCCTTGAGAGCTTACAAG  
CAGAGGCGCCTCCCTCCCAGCTG

>2909 len=143 tot-seq=3

GATGTTCTTCACGTCCTCCGCCGGAACGGCAGACTGTCTGTCCGGATGCCGCTCTCTTC  
CAGCACTTCCAGGGTGTGGGACATATGGTCCAATATATGCAGGTACCGTATTCTCCCCC  
CTGCATCCCCATGCTAATCTGTC

>2910 len=144 tot-seq=3

TGGGGAATATTGCGCAATGGGCGGAAGCCTGACGCAGCGACGCCGCGTGGGGGATGACGG  
CCTTCGGGTTGTAAACCTCCTTCGACCTTGACGAAGCCTTTGGGGTGACGGTAGGGGTA  
GAAGAAGCACCGGCCAACTACGTG

>2911 len=145 tot-seq=3

ATCTTAAGTGTGTCTTACCGAGGTTGGCTTTTGATCTGAGTGCAAAGTCCATATTAGTAG

GTAGGTGGTGCCCTTCTGAGAAGCATGGCACCTGGGACATCATGTTCTGTCAGAAAGAAG  
CTGAAAGGAAGCAGAGTGACTGTGT

>2912 len=145 tot-seq=3

TGGGGAATATTGCACAATGGGCGCAAGCCTGATGCAGCGACGCCGCGTGCGGGATGACGG  
CCTTCGGGTTGTAAACCGCTTTCAGTACAGAAGAAGCCCTTTTTGGGTGACGGTATGTGC  
AGAAGAAGCGCCGGCTAACTACGTG

>2913 len=145 tot-seq=3

GGTTGTTCTCTTGAGAAGGGAGCCTGGAGCTGGGGGCTTAATGAGTAATTCAAAGAGGA  
AGAGGCTTGAAGCTACCCTAGGAGGAGGCATGGGAAGCCTCAAGGTCTTGTGAGGAT  
GGCAGAGTGAGCAGAATTACCAAGA

>2914 len=145 tot-seq=3

TGAGGAATATTGGTCAATGGGCGCGAGCCTGAACCAGCCAAGTCGCGTGAGGGATGACGG  
CCCTACGGGTTGTAAACCTCTTTTGTCTGGGGAGCAAATCCGTTACGTGTAACGGAGTCA  
AGAGTACCCGAAGAAAAAGCATCGG

>2915 len=146 tot-seq=3

TGGGGAATATTGCACAATGGGCGCAAGCCTGATGCAGCGACGCCGCGTGAGGGATGACGG  
CCTTCGGGTTGTAAACCTCTTTTGTCTAGGGAAGAAGCCACTTTTGTGGTGACGGTACCTG  
GATAAGAAGCACCGGCTAACTACGTG

>2916 len=146 tot-seq=3

CTGTGGTCCCAAAGGCTTGGTCAGCCTGCCTTAACCCCTCTCATGCCAGCCCACTCACC  
CCAGCCGATGCCAGGTAGAGGCTGAAGAAGCTCCTCTCGGGGAGGGTGGCCAGGCCAG  
CAGGTTGTGCAGGTACAGGCCCTCCA

>2917 len=146 tot-seq=3

CAATGGGCGCAAGCCTGATGCAGCCATGCCGCGTGTATGAAGAAGGCCTTCGGGTTGTAA  
AGTACTTTCAGCGGGGAGGAAGGGGATGTGGTTAATAACCGCATTATTGACGTTACCCG  
CAGAAGAAGCACCGGCTAACTCCGTG

>2918 len=146 tot-seq=3

AGAGGGCTATGAAAGTGGGTCCCAGAAAGGACCCCTCCACATACACACCGCAAGCATC  
TTTGGGGTTGGCCGGAGGGGCGGGCCCTGGCTGGGCTCAGGCGAGAATCCGCTGGAATGG

GAGGTGAGGATGATGGATGGCGCCTT

>2919 len=147 tot-seq=3

TGGGGAATAGGGCGCAATGGGGGAAACCCTGACGCAGAGATGCCGCGAGCGGGATGAAGG  
CCTTCGGGTGGTAAACCGCTTTTGATTGGGAGCAAGCCTTTGGGTGAGTGTACCTTTTCG  
ATAAGCGCAGGCTAACTACGTGCCAG

>2920 len=147 tot-seq=3

ACAATGGACGAAAGTCTGATGGAGCAACGCCGCTGAGTGAAGAAGGGTTTCGGCTCGTA  
AAGCTCTGTTGTTAGAGAAGAAAGATAGAGGGAGTAACTGGCCTTTATTTGACGGTAACT  
ACTTAGAAAGTCACGGCTAACTACGTG

>2921 len=149 tot-seq=3

AAGCTCTCAAGGTGACTCTGTGTGTGTTGAACTTTGGTGAGCACTGACGTAGGGGAAGAA  
CAGTGTTCCAGAAGAAGGCTGAAGACTCTACCCCAAGGGCATTGAGGAGGCAGAAAGGAGC  
ACTAGATCCAGAACTGAGGTGGAGCAGT

>2922 len=149 tot-seq=3

GAAGGGAGGACAACCTCTCTGGGGAGCAGAGAAGTGGTCAACAGGAGGAGGTCAAAGGCC  
CAGGGCGGGTTTTGCTTACAGCGTGAGAGTTGTCCCATGTTTGGGGCCGATAGAAGTGAT  
CCAGTCCCCAGCAGCCGCGGTATAAGAAG

>2923 len=150 tot-seq=3

ACCCTCCCCACCCCCACACCCCCCTGCAATGATGGCATGCTTAAAGGCATGGAGGCT  
GCCTCCAAGAAGACGTGTGAGATTGTAATGTGCATCACAAGCGCCTCCGGCATCACAGA  
GCTCCCTTCCACTGGGGGTGAAGCACTCTC

>2924 len=150 tot-seq=3

TGGGGAATATTGGACAATGGGCGGAAGCCTGATCCAGCAACGCCGCGTGAGGGATGACTG  
CCTTCGGGTGTAAACCTCTTTAGTATCGATGAAGCGCCCGGATAGGGTGGTGACGGTA  
GGTACAGAAGAAGCACCGGCCAACTACGTG

>2925 len=151 tot-seq=3

AGCGCTTGGGAGTGCAAGGCTTGACCATCAGTGGGTACCTCCGGCCTGCAAGAGCAGAAG  
CAGAACAGAGCGTCACCTGTGCACACTGCAGAAAGGACACAGAGGAGAGTGTCTGTGGGG  
CCACGTTGCTCCTCAGGACCCTTCAGTTTAT

>2926 len=152 tot-seq=3

TGGGGAATATTGCACAATGGGCGAAAGCCTGATGCAGCGACGCCGCGTGAGGGACGACGG  
CCTTCGGGTTGTAAACCTCTTTCAGTAGGGAACAAGGCATCATTTTTGTGGTGTGAGGG  
TACTTGCAGAAGAAGCACCGACTAACTACGTG

>2927 len=152 tot-seq=3

CACTTAGGATGGGGTACAAGTGGATGGAAGGACAACACTGCCTGAACCGAGGGAGAGTGG  
AGGTGCTGCATCCACCCACCTTGCCTGCTGAGGGTCTTCTGAGATCTGTGCTGAGGTTT  
GAAGTCGCAGACGTCTAGAAGGTGCCTGAAG

>2928 len=152 tot-seq=3

CGGGGAGCTGCCAGCACCTAGTGCCTGGGGTCTCTGAGACTAGTGCCAGCCCGGGAAGC  
CCGTCTGTCCGCAGCATGTCAGGGCCAGAATCCTCCCCTCCCATTGGTGGGCCCTGTGAA  
GCTGCTCCTTCATCCTCACTGCCACTCCACC

>2929 len=152 tot-seq=3

TGGGGAATATTGCGCAATGGGGGAAACCCTGACGCAGCGACGCCGCGTGCGGGATGAAGG  
CCTTCGGGTTGTGAACTCCTTTTTCTCGTGAAAAAGGCATGCTTTTGGGTGTGTTGATGG  
TAGCGGGGGAAGAAGCGCCGGCTAACTACGTG

>2930 len=153 tot-seq=3

ATACCATTAGTTCCTTTGTTGGGTCTGCTGTTGTCCTGGACAGGAAGAAGTGTGTGAA  
GTCCCTTTCTTTGTATTCTTTTCCAGGAAAAGTGATCCAAGTTGGAGGCCCCACTCCTGG  
CACGCTACCAAGTACTTTGATGTCCACCCTGAG

>2931 len=153 tot-seq=3

TAGGGAATCTCCACAATGGACGCAAGTCTGATGGAGCAACGCCGCGTGAGGGATGAAGG  
CCTTCGGGTTGTAAACCTTTTTCGCTCATGGTCAAGCCGCAGCTTTGGGTTGTGGTGAGG  
GTAGTGGGTAAAGAAGCGCCGGCTAACTACGTG

>2932 len=154 tot-seq=3

TAGGGAATATTCCACAATGAGCGAAAGCTTGATGGAGCGACACAGCGTGCACGATGAAGG  
TCTTCGGATTGTAACTGCTTTTATAAGGGAATAAAGTGAGTCTCGTGAGACTTTTTGCA  
TGTACCTTATGAATAAGGACCGGCTAATCCGTG

>2933 len=154 tot-seq=3

TGGGGAATATTGGACAATGGGCGGAAGCCTGATCCAGCAACGCCGCGTGAGGGATGACGG  
CCTTCGGGTTGTAAACCTCTTTTCAGTACCGACGAAGTTGTGCTTTTTTGGGTGTGGTGAC  
GGTAGGTACAGAAGAAGCACCGGCCAACTACATG

>2934 len=154 tot-seq=3

TGGGGAATCTTCCGCAATGGACGAAAGTCTGACGGAGCAACGCCGCGTGAGTGAAGAAGG  
TCTTCGGATTGTAAACTGCTTTTATATGGGAATAAAGTGAGGGACGTGTCCCTTATTGCA  
TGTACCATACGAATAAGGACCGGCTAATTCCGTG

>2935 len=154 tot-seq=3

TAGGGAATATTGGGCAATGGAGAAAACCTGACCCAGCCATGCCGCGTGCAGGAAGAAGG  
CCCTCTGGGTTGTAAACTGCTTTTGATAGGGAAGAAAGAGGTTATGCGTAACCAGTTGAC  
GGTACCTATCGAATAAGCACCGGCTAACTACGTG

>2936 len=154 tot-seq=3

TGGGGAATATTGCACAATGGGGGAAACCCTGATGCAGCAACGCCGCGTGAGTGATGAAGG  
TTTTCGGATCGTAAACCTCTTTTATAAGGGAATAAAGTGCGGGACGTGTCCCGTTTTGTA  
TGTACCTTATGAATAAGGATCGGCTAACTCCGTG

>2937 len=154 tot-seq=3

ATATCATTTGGTGTGGTGTCTAGGAAAACCTGGAATGAACTCCAGAATGTTTCAGTTCAGTT  
CCTGACTGAGAGGCCTGGGGAACAGTCAACCAACGCTGACTGAGTCCGTGGATGGAGTCC  
TGTGCTCTGGTGTGAGAGAAAACCACTCTTAG

>2938 len=154 tot-seq=3

CCACCACATGTGATTAGTTTCTTGTGTTCTCTAACTGGGAGCCAGATGGATCAAGTAGC  
TCAGGACCTAAAACCTGACCTACTTAGAGCCATCAGGTCTGATGAGGTGAGCATAGCTTGG  
GAGTCCAAAGACCTGAATGCCAGTCCTAGTCCTT

>2939 len=154 tot-seq=3

TAGGGAATATTGGGCAATGGGCGCAAGCCTGACCCAGCCATGCCGCGTGCCGGAAGAAGG  
CCCTCTGGGTTGTAAACGGCTTTTGACGGGGAAGAAACGACCCTTGCAGGGGCATTGAC  
GGTACCCGCAGAATAAGCACCGGCTAACTCCGTG

>2940 len=154 tot-seq=3

TGAGGAATATTGGTCAATGGTCTGACGACTGAACCAGCCATGCCGCGTGAAGGTCACGGC

CCTATGGGTCTTAACTTCTTTTTCGCGAGGGAGCAATAAGGTCTACGTGTAGTCCGATGAG  
AGTACCTCGCGAATAAGCATCGGCTAACTCCGTG

>2941 len=154 tot-seq=3

TGCTGACCACTGTGACACCGTGCCACCCAAACAAAAACAGAAAATGCTGGAGAACTCAA  
CAGATCTGGCAGCATCTGTGGAGAGGGAATGTTGAAAATGATGCTGTAAGAATGTGTTGA  
GATTTTTTCAGCATCTCCGTTTTTGTTCAGATT

>2942 len=155 tot-seq=3

TGAGGAATATTGGTCAATGGACGAGAGTCTGAACCAGCCAAGTAGCGTGAAGGATGACTG  
CCCTATGGGTTGTAACTTCTTTTATATGGGAATAAAGTGAGGGACGTGTCCCTTATTGC  
ATGTACCATACGAATAAGGGCCGGCTAATTCCGTG

>2943 len=155 tot-seq=3

TGAGGAATATTGGTCAATGGGCGAGAGCCTGAACCAGCCAAGTAGCGTGAAGGATGAAGG  
TTCTATGGATTGTAACTTCTTTTATAAGGGAATAAAGTGCTTTACGTGTAGAGTTTTGT  
ATGTACCTTATGAATAAGCATCGGCTAACTCCGTG

>2944 len=155 tot-seq=3

TGAGGAATATTGGTCAATGGGCGCGAGCCTGAACCAGCCAAGTCGCGTGAAGGAAGACGG  
CCCTACGGGTTGTAACTTCTTTAGTCGGAGAGTAAAGGTCGGTACGTGTACCGATTTGC  
AAGTATCCGAAGAATAAGCATCGGCTAATTCCGTG

>2945 len=155 tot-seq=3

TGGGGAATATTGCGCAATGGGGGGAACCCTGACGCAGCGACGCCGCGTGCAGGATGACGG  
CCCTATGGGTTGTAACTGCTTTTATAAGGGAATAAAGTGAGTCTCGTGAGGCTTTTTGC  
ATGTACCTTATGAATAAGGACCGGCTAATTCCGTG

>2946 len=155 tot-seq=3

TGAGGAATATTGGTCAATGGCCGGAAGGCTGAACCAGCCAAGTCGCGTGAGGGACGACTG  
CCCTATGGGTTGTAACTTCTTTTATAAGGGAAGAATAAATGCTACGTGTAGCATGATGC  
CTGTACCTTATGAATAAGCATCGGCTAACTCCGTG

>2947 len=155 tot-seq=3

TGGGGAATATTGCACAATGGGCGCAAGTCTGAACCAGCCAAGTAGCGTGCAGGATGACGG  
CCCTATGGGTTGTAACTGCTTTTGTATGGGGATAAAGTTAGGGACGTGTCCCTATTTGC



AGGTACCATACGAATAAGGACCGGCTAATTCCGTG

>2948 len=155 tot-seq=3

TGAGGAATATTGGTCAATGGCCGAGAGGCTGAACCAGCCAAGTAGCGTGAAGGATGAAGG

TTCTATGGATTGTAACTTCTTTTATACGAGAATAACACCATCTACGTGTAGATGCCTGC

ATGTACCGTATGAATAAGCATCGGCTAACTCCGTG

>2949 len=155 tot-seq=3

TGAGGAATATTGGTCAATGGACGAGAGTCTGAACCAGCCAGGTAGCGTGCAGGATGACGG

CCCTATGGGTTGTAACTGCTTTTACGCGGGGATAAAGTGCGTGACGTGTCGCGCATCGC

AGGTACCGCGTGAATAAGGACCGGCTAATTCCGTG

>2950 len=155 tot-seq=3

TGAGGAATATTGGTCAATGGGCGCGAGCCTGAACCAGCCAAGTCGCGTGAGGGAAGACGG

TCCTATGGATTGTAACTTCTTTTGCCGGGGAGCAAAAAGTCCACGCGTGACAGGATGA

GAGTACCTGAAGAAAAAGCATCGGCTAACTCCGTG

>2951 len=155 tot-seq=3

TGGGGAATATTGCACAATGGGGGGAACCCTGATGCAGCGACGCCCGTGAAGGAAGACGG

CCCTATGGGTTGTAACTTCTTTTGTGCGGAGAACAAAACCCGGGACGTGTCCCGGACTGC

GTGTATCCGAAGAAAAAGCATCGGCTAACTCCGTG

>2952 len=155 tot-seq=3

TGGGGAATATTGCGCAATGGGGGAAACCCTGACGCAGCGACGCCCGTGCGGGATGACGG

CCCTATGGGTTGTAACTGCTTTTATATGGGAATAAAGTGAGGGACGCGTCCCTTATTGC

ATGTACCATATGAATAAGGACCGGCTAATTCCGTG

>2953 len=155 tot-seq=3

TGAGGAATATTGGTCAATGGTCGGAAGACTGAACCAGCCAAGCCCGTGAAGGAAGAAGG

TGCTCGGCATCGTAACTTCTTTTGTGAGGGAACAAAGGGCGGTACGTGTACCGCTGTGA

GTGTACCTGAAGAAAAAGCATCGGCTAACTCCGTG

>2954 len=155 tot-seq=3

TGAGGAATATTGGTCAATGGACGGAAGTCTGAACCAGCCAAGTAGCGTGCAGGGTACGG

CCCTATGGGTTATAAACTGCTTTTGTATGGGGATAAAGTTAGGGACGTGTCCCTATTTGC

AGGTACCATACGAAGAAGCACCGGCTAACTCCGTG

>2955 len=155 tot-seq=3

TGAGGAATATTGGTCAATGGGCGGGAGCCTGAACCAGCCAAGCCGCGTGAGGGAAGAAGG  
CCCTACGGGTCGTAAACCTCTTTTGCCGGGGAACAAAAGCGGGTATGTATACCCGTATGA  
GTGTACCCGGAGAAAAAGCATCGGCTAACTCCGTG

>2956 len=155 tot-seq=3

TGAGGAATATTCCACAATGGGCGAAAGCCTGATGGAGCAATGCCGCGTGCAGGATGACGG  
CCCTATGGGTTGTAAACTGCTTTTATATGGGAATAAAGTGAGGGACGTGTCCCTTATTGC  
ATGTACCATATGAATAAGGACCGGCTAATTCCGTG

>2957 len=155 tot-seq=3

TAGGGAATTTTCGGCAATGGGGGGAACCCTGACCGAGCAACGCCGCGTGAGTGAAGACGG  
CCTTCGGGTTGTAAAGCTCTGTTGTAAGAAAAGATAAACTAGGAGAGGATCTTAGTCAGA  
CATTATCTTACCAGAAAGCCACGGCTAACTACGTG

>2958 len=155 tot-seq=3

TGAGGAATATTGGTCAATGGGCGAGAGCCTGAACCAGCCAAGTAGCGTGCAGGAAGACGG  
CCCTATGGGTTGTAAACTGCTTTTATGTGGGGATAAAGTGCGTGACGTGTCATGCATTGC  
AGTTACCATACGAATAAGCATCGGCTAACTCCGTG

>2959 len=155 tot-seq=3

TGAGGAATATTGGTCAATGGGCGCAAGCCTGAACCAGCCAAGTAGCGTGAAGGATGACTG  
CCCTATGGGTTGTAAACTTCTTTTATATGAGAACAAATGTAGTTACGTGTAACTATTTGC  
GTGTACCATATGAATAAGCATCGGCTAACTCCGTG

>2960 len=155 tot-seq=3

GGAGGAATATGGGTCAAGGGGCGAGAGCAGGAACCAGCCAAGGAGCGGGCAGGAGGACGG  
CCCGAGGGGTTGTAAACGGCTTTTATATGGGAATAAAGTGAGGGACGTGTCCCTTATTGC  
ATGTACCATATGAATAAGGACCGGCTAATTCCGTG

>2961 len=155 tot-seq=3

TGAGGAATATTGGTCAATGGGCGGGAGCCTGAACCAGCCAAGTAGCGTGCAGGAAGACGG  
CCCTATGGGTTGTAAACTGCTTTTATGCGGGGATAAAGGAGTCTACGTGTAGGTGTTTGC  
AGTTACCATACGAATAAGCATCGGCTAACTCCGTG

>2962 len=155 tot-seq=3

TGGGGAATATCGCACAAATGGGCGAAAGCCTGAACCAGCCAAGTAGCGTGCAGGATGACGG  
CCCTATGGGTTGTAAACTGCTTTTATGCGGGGATAAAAGTGC GCGACGTGTCGTGCATTGC  
AGGTACCGCATGAATAAGGACCGGCTAATCCCGTG

>2963 len=155 tot-seq=3

TGAGGAATATTGGTCAATGGTCGAGAGACTGAACCAGCCAAGTAGCGTGCAGGATGACGG  
CCCTCCGGGTTGTAAACTGCTTTTAGTTGGGAATAAAGTTCGGGACGTGTCCCGTTTTGT  
ATGTACCATCAGAAAAGGACCGGCTAATTCCGTG

>2964 len=155 tot-seq=3

TGAGGAATATTGGTCAATGGGCGGAAGCCTGAACCAGCCAAGTCGCGTGAAGGATGACTG  
CCCTATGGGTTGTAAACTTCTTTTGTAAATGGGAGAATAAGGATTACGTGTAATCCGATGA  
CTGTACTTTACGAATAAGCATCGGCTAACTCCGTG

>2965 len=155 tot-seq=3

TGAGGAATATTGGTCAATGGACGAGAGTCTGAACCAGCCAAGTAGCGTGCAGGACGACGG  
CCCTATGGGTTGTAAACTGCTTTTATGCGGGGATAAAAGTCACCCACGTGTGGGTGTTTGC  
AGGTACCGCATGAATAAGGACCGGCTAATCCCGTG

>2966 len=155 tot-seq=3

TAAGGAATATTGGTCAATGGACGCAAGTCTGAACCAGCCATGCCGCGTGAAGGATTAAGG  
TCCTCTGGATTGTAAACTTCTTTTATCTGGGACGAAAAAAGGCGATTCTTCGTCACTTGA  
CGGTACCAGATGAATAAGCACCGGCTAACTCCGTG

>2967 len=155 tot-seq=3

TGAGGAATATTGGTCAATGGGCGAGAGCCTGAACCAGCCAAGTAGCGTGAGGGATGACCG  
CCCTACGGGTTGTAAACCTCTTTTATAAGGGAATAAAATGAAGTACGCGTACTTCTTTGC  
ATGTACCTTATGAATAAGCATCGGCTAACTCCGTG

>2968 len=155 tot-seq=3

TGGGGAATCTTGACAAATGGGCGAAAGCCTGATGCAGCGACGCCGCGTGCAGGATGACGG  
CCCTATGGGTTGTAAACTGCTTTTATGTGGGGATAAAAGTGC GGTGACGTGTCATGCATTGC  
AGGTACCACATGAATAAGGACCGGCTAATCCCGTG

>2969 len=155 tot-seq=3

TGGGGAATATTGCACAATGGACGGAAGTTTGTATGCAGCCAAGTAGCGTGCAGGATGACGG

CCCTATGGGTTGTAACTGCTTTTGTGGGAATAATCGACATTACGTGTAATGTTTTGC  
ATGTACCATTGAATAAGGACCGGCTAATTCCGTG

>2970 len=155 tot-seq=3

TGAGGAATATTGGTCAATGGGCGAGAGCCTGAACCAGCCAAGTAGCGTGCAGGATGACGG  
CCCTATGGGTTGTAACTGCTTTTATATGGGAATAAAGGAGTCCACGTGTGGGCTTTTGC  
AGGTATCGCATGAATAAGGACCGGCTAATTCCGTG

>2971 len=155 tot-seq=3

TGAGGAATATTGGACAATGGGTTAGCGCCTGATCCAGCCATCCCGCGTGAAGGATTAAGG  
ACCTATGGTTTGTAACTTCTTTTGTACAGGGATAAACCTACTCTCGTGAGAGTAGCTGA  
AGGTACTGTACGAATAAGCACCGGCTAACTCCGTG

>2972 len=155 tot-seq=3

TGAGGAATATTGGTCAATGGACGCAAGTCTGAACCAGCCATGCCGCGTGCAGGATGACGG  
TCCTATGGATTGTAACTGCTTTTGTACGAGAAGAAACCTTCTACGTGTAGAAAGCTGA  
CGGTATCGTAAGAATAAGGATCGGCTAACTCCGTG

>2973 len=155 tot-seq=3

TGAGGAATATTGGTCAATGGGCGGAAGCCTGAACCAGCCAAGTCGCGTGGAGGAAGACGG  
CCCTACGGGTTGTAACTCCTTTTACCTGGGAATAACGGGCGCTACGCGTAGCGCTGTGC  
AAGTACCGGGAGAATAAGCATCGGCTAATTCCGTG

>2974 len=155 tot-seq=3

TGAGGAATATTGGTCAATGGCCGGAAGGCTGAACCAGCCAAGTCGCGTGAGGGAATGAGG  
CCCTACGGGTCGTGAACCTCTTTTGCCGGGGAGCAAAGCCGCCACGTGTGGGCGGAAGG  
AGAGTACCCGGAGAAAAAGCATCGGCTAACTCCGT

>2975 len=155 tot-seq=3

TGAGGAATATTGGTCAATGGGGGGAACCCTGAACCAGCCAAGTAGCGTGCAGGATGACGG  
CCCTATGGGTTGTAACTGCTTTTGTGCGTGGATAAAGTAGGCCACTTGTGGCCTTTTGC  
AGGTACCGCACGAATAAGGACCGGCTAATTCCGTG

>2976 len=155 tot-seq=3

TGAGGAATATTGGTCAATGGGCGAGAGCCTGAACCAGCCATCCCGCGTGCAGGATGACGG  
CCCTATGGGTTGTAACTGCTTTTCTGCTCCAAGAAACCTGATTACGAGTAATCAGTTGA

CGGTAGAGTAGGAATAAGCATCGGCTAACTCCGTG

>2977 len=155 tot-seq=3

TGGGGAATCTCCGCAATGGACGAAAGTCTGACGGAGCAACGCCGCGTGAGTGAAGACGG  
CCCTATGGGTTGTAAACTGCTTTTGTGGGAATAATCGACATTACGTGTAATGTTTTGC  
ATGTACCATTCTGAATAAGGACCGGCTAATCCGTG

>2978 len=156 tot-seq=3

TGAGGAATATTGGTCAATGGGCGCAGGCCTGAACCAGCCAAGTAGCGTGAAGGATGACTG  
TCCTATGGGTTGTAAACTTCTTTTATAAAGGAATAAAGTCGGGTATGGATACCCCGTTTG  
CATGTACTTTATGAATAAGGATCGGCTAACTCCGTG

>2979 len=156 tot-seq=3

TGAGGAATATTGGTCAATGGGCGGAAGCCTGAACCAGCCAAGTCGCGTGAGGGATGACGG  
CCCTACGGGTTGTAAACCTCTTTTGCCGGGGAACAAATGGCGGGACGCGTCCCGCAGTGG  
AGTGTACCCGGAGAAAAAGCATCGGCTAACTCCGTG

>2980 len=156 tot-seq=3

TGGGGAATCTTGACAATGGGCGAAAGCCTGATGCAGCGACGCCGCGTGAAGGAAGACTG  
CCCGCAAGGGTTGTAAACTTCTTTTGTATGGGATTAAGTCACCTACGTGTAGGTGTTTG  
CAGTTACCATACGAATAAGCATCGGCTAACTCCGTG

>2981 len=157 tot-seq=3

CCCGCAACAGACCAAAGGGATTAACAGCCTCCGCCGTCCACACCCACACATGCACCCTC  
CGGTTGCCCCCTGTAAGAACTGAGGTGCCCTCCCACCCGCTCGTTCACACCTACACGAG  
GCCGGAGCAAAGGTCAGTATCCACCGCACCCCTCTTG

>2982 len=157 tot-seq=3

GAAGGCAGCCTACGGGGAGAAGATCATGCTTCCCCAGGACCTTAGGAAAAACAAGGGAAA  
AGCTGGGAGGATGAGTCTACAGAGAGAGGGAGGAAGGGAGCCCCACTTTGGCCACCCAGC  
TGCACCCTAGTGTGGGTCCTTGGCCTCTATAGTGT

>2983 len=158 tot-seq=3

GCTCAGGTTCTGTACTTGTCCCTACATGTCCACTCAGTCTCAGCCTGGGTCTACTCTCTA  
ACCTTAATTGGAGGTCTTCCCTGCCTACCTCTGGGATGTCATTAGAAAAATGATACAAGT  
TGGAAACTCACAGCCCTGGCTGTACAGACAGCGACCGC

>2984 len=158 tot-seq=3

TGGGGAATTTTGCACAATGGGGGAAACCCTGATGCAGCGACGCGTGAGTGAAGAGGGTTT  
TCGGATCGTAAAGCTCTGTTGTTAAGGAAGAACGAGTGTGAGAATGGAAAGTTCATGCTG  
TGACGGTACTTAACCAGAAAGGGACGGCTAACTACGTG

>2985 len=159 tot-seq=3

TTTTTTTTTTCAAGCAGAAGACGGCATAACGAGATAAACTGTGACTGGAGTTCAGACGTG  
TGCTCTCCGATCTCCTACGGGAGGCAGCGGTGATTAACCTTTAGCAATAAACGAAAGTTT  
AACTAAGCTATACTAACCCAGGGTTGGTCAATTTTCGTG

>2986 len=159 tot-seq=3

TGGGGAATATTGCGCAATGGGGGAAACCCTGACGCAGCGACGCCGCGTGCGGGATGAAGG  
CCTTCGGGTTGTAAAGTTCCTTTATTTAGGAAAAAAGCGTGCTAGGAAATGAGCGCGCC  
TTGATGGTACTAATTGAATAAGTGACAGCTAGCTATGTG

>2987 len=159 tot-seq=3

TGGGGAATATTGGACAATGGGCGCAAGCCTGATCCAGCAATGCCGCGTGTGTGAAGAAGG  
CCTTTGGGTTGTAAAGCACTTTAGGCAGGGAAGAAAAATCGGCGATAACATCGCCGGTC  
TTGACGGTACCTGAGGAATAAGCACCGGCTAACTCTGTG

>2988 len=159 tot-seq=3

TGGGGAATTGTTGCAATGGGCGCAAGCCTGACGACGCAACGCCGCGTGGAGGATGAAGG  
TCTTCGGATTGTAAACTCCTGTTGCCCGGGACGAAACGCTCCGACCTAACACGTCTGGAGC  
CTGACGGTACCGGGTGAGGAAGCCCCGGCTAACTCTGTG

>2989 len=160 tot-seq=3

TAGGGAATCTCCACAATGGACGAAAGTCTGATGGAGCAACGCCGCGTGAGTGAAGAAGG  
CCTTCGGGTCGTAAAGCTCTGTTGCGGGGGAAAAAAGGCAGCATCAGGAAATGGGTGCTG  
ACTGATGGTGCCCCGCCAGAAAGTCACGGCTAACTACGTG

>2990 len=160 tot-seq=3

TGGGGAATATTGCACAATGGGGGAAACCCTGATGCAGCGACGCCGCGTGGAGGAAGAAGG  
TCTTCGGATTGTAAAGCACTTTAAGTTGGGAGGAAGGGTTGTAGATTAATACTCTGCAAT  
TTTGACGTTACCGACAGAATAAGCACCGGCTAACTCTGTG

>2991 len=160 tot-seq=3

TGAGGAATATTGGTCAATGGGCGCAGGCCTGAACCAGCCAAGTAGCGTGAGTGATGAAGG  
TCTTCGGATCGTAAAACCTCTGTTATTAGGGAAGAACAATGTGTAAGTAACTATGCACGT  
CTTGACGGTACCTAATCAGAAAGCCACGGCTAACTACGTG

>2992 len=160 tot-seq=3

TGGGGAATATTGCACAATGGGGGAAACCCTGATGCAGCGACGCCGCGTGAGTGAAGAAGG  
CCCTCGGGTTGTAAAGCTCTTTTGTGAGGGAAGAAAAGGTGATCTCTAATACAGGTCCT  
CATGACGGTACCTGAAGAATAAGCACCGGCTAACTACGTG

>2993 len=160 tot-seq=3

TGGGGAATTTTGGACAATGGGCGAAAGCCTGATCCAGCAATGCCGCGTGTGTGAAGAAGG  
CCTTCGGGTTGTAAAGCACTTTCAGTGAGGAAGAACGCCTGGTGGTTAATACCCATCAGG  
AAAGACATCACTCACAGAAGAAGCACCGGCTAACTCCGTG

>2994 len=160 tot-seq=3

CTGCAGAGGGACTCTGTATCTCAGGAACGATGGCTCTGGCTCATTACTTAGCTTCTCCTA  
AGAAATGTCCTTCCCTTGCAGGAGCTGAGGTTCCACTGAGCCAGGCACAGCTCAGAGATT  
GACAGTCACCTCAGCTCCCAGCAGCCTCTGGTCAATCCAG

>2995 len=160 tot-seq=3

TGGGGAATTTTGGACAATGGACGCAAGTCTGATCCAGCCATTCCGCGTGCAGGATGAAGG  
CCCTCGGGTTGTAAACTGCTTTTGTACGGAACGAAAAGCCTTCTTCTAATACAGGAGGGT  
CATGACGGTACCGTAAGAATAAGCACCGGCTAACTACGTG

>2996 len=160 tot-seq=3

TGGGGAATCTTGCACAATGGGCGAAAGCCTGATGCAGCGACGCCGCGTGCGGGATGAAGG  
CCTTCGGACCGTAAAACCTCTGTTATTAGGGAAGAACATATGTGTAAGTAACTGTGCACAT  
CTTGACGGTACCTAATCAGAAAGCCACGGCTAACTACGTG

>2997 len=160 tot-seq=3

TGGGGAATATTGCGCAATGGGGGAAACCCTGACGCAGCGACGCCGCGTGCGGGATGAAGG  
TCTTCGGATCGTAAAACCTCTGTTATTAGGGAAGAACATATGTGTAAGTAACTGTGCGCAT  
CTTGACGGTACCTAATCAGAAAGCCACGGCTAACTACGTG

>2998 len=160 tot-seq=3

TGGGGAATACTGCACAATGGGCGCAAGCCTGATGCAGCCATGCCGCGTGTATGAAGAAGG

CCTTCGGGTTGTAAAGTACTTTTCAGCGGGGAGGAAGGTGTTGCGGTTAATAACCGCAGCA  
ATTGACGCTACCCGCAGAAGAAGCACCGGCTAACTCCGTG

>2999 len=160 tot-seq=3

TGGGGAATATTGGACAATGGGCGCAAGCCTGATCCAGCCATGCCGCGTGAGTGAAGAAGG  
CCTTCGGGTTGTAAAGCTCTTTTGTCCGAAAGAAAAGCCCTGGATTAATACTTTGGGGT  
TATGACGGTACCGGAAGAATAAGCACCGGCTAACTTCGTG

>3000 len=160 tot-seq=3

TGGGGAATATTGGACAATGGGCGCAAGCCTGATCCAGCCATGCCGCGTGGGTGAAGAAGG  
CCTTCGGGTTGTAAAGCCCTTTTGTCCGGGAAGAAATCGTCTGGGCTAATACCCCGGGCG  
GATGACGGTACCGGAAGAATAAGCACCGGCTAACTTCGTG

>3001 len=160 tot-seq=3

TGGGGAATATTGCGCAATGGGGGAAGTCTGACCGAGCAACGCCGCGTGAGTGAAGAAGGT  
TTTCGGATCGTAAAGCTCTGTTGTAAGAGAAGAACGAGTGTGAGAGTGGAAGTTCACAC  
TGTGACGGTATCTTATCAGAAAGGGACGGCTAACTACGTG

>3002 len=160 tot-seq=3

TGGGGAATATTGCACAATGGGCGCAAGCCTGATGCAGCGACGCCGCGTGAGTGAAGAAGG  
GTTTCGGCTCGTAAAGCTCTGTTGTTAAAGAAGAACGTGGGTAAGAGTAACTGTTTACCC  
AGTGACGGTATTTAACCGAAAAGCCACGGCTAACTACGTG

>3003 len=160 tot-seq=3

TGGGGAATATTGCACAATGGGGGAAACCCTGATGCAGCGACGCCGCGTGAGCGATGAAGT  
ATTTCCGGTATGTAAAGCTCTATCAGCGGGGAGGAAGGGAGTAAAGTTAATACCTTTGCTC  
ATTGACGTTACCCGCAGAAGAAGCACCGGCTAACTCCATG

>3004 len=160 tot-seq=3

TGGGGAATATTGCGCAATGGGCGAAAGCCTGACGCAGCGACGCCGCGTGAGGGATGAAGG  
TTCTCGGATCGTAAACCTCTGTTATTAGGGAAGAACAAATGTGTAAGTAACTATGCACGT  
CTTGACGGTACCTAATCAGAAAGCCACGGCTAACTACGTG

>3005 len=160 tot-seq=3

TGGGGAATTTTGGACAATGGGCGCAAGCCTGATCCAGCAATGCCGCGTGCAGGAAGAAGG  
CCTTCGGGTTGTAAACTGCTTTTGTACGGAACGAAACGGTCCTGGTTAATACCCGGGGCT



AATGACGGTACCGTAAGAATAAGCACCGGCTAACTACGTG

>3006 len=160 tot-seq=3

TGGGGAATATTGCACAATGGGGGAAACCCTGATGCAGCCATGCCGCGTGTGTGAAGAAGG

CCTTCGGGTTGTAAAGCACTTTTCAGTCAGGAGGAAAGGTGGCTAGCTAATATCTAGTTGC

TGTGACGTTACTGACAGAAGAAGCACCGGCTAACTCCGTG

>3007 len=160 tot-seq=3

TGGGGAATTTTGGACAATGGGGGAAACCCTGATCCAGCCATCCC GCGTGTGCGATGAAGG

CCTTCGGGTTGTAAAGCACTTTTGGCAGGAAAGAAACGGCGCGTGCTAATACCATGCGCA

ACTGACGGTACCTGCAGAATAAGCACCGGCTAACTACGTG

>3008 len=160 tot-seq=3

TAGGGAATCTTCCACAATGGACGCAAGTCTGATGGAGCAACGCCGCGTGAGTGAAGAAGG

GTTTCGGCTCGTAAAGCTCTGTTGTTGGTGAAGAAGGACAGGGGTAGTAACTATTCACGC

AGTGACGGTATTCAACCAGAAAGTCACGGCTAACTACGTG

>3009 len=160 tot-seq=3

TGGGGAATTTTGGACAATGGGGGAAACCCTGATCCAGCCATCCC GCGTGTGTGATGAAGG

CCTTCGGGTTGTAAAGCACTTTTGACAGGGAAGAAATAGCAGAGGCTAATATCCTTTGTG

AATGACGGTACCTGTAGAATAAGCACCGGCTAACTACGTG

>3010 len=160 tot-seq=3

TAGGGAATCTTCCACAATGGACGCAAGTCTGATGGGGCAACGCCGCGTGAGTGAAGAAGG

GTTTCGGCTCGTAAACTCTGTTGTAAGAGAAGAACAATTGTAGAGTAACTGCTACAGT

CTTGACGGTATCTTACCAGAAAGCCACGGCTAACTACGTG

>3011 len=160 tot-seq=3

TAGGGAATCTTCCACAATGGACGCAAGCCTGATCCAGCCATGCCGCGTGTCTGAAGAAGG

CCTTCGGGTTGTAAAGGACTTTTGTGAGGGAAGAAAAGGCTGTTGCTAATACCGACAGCT

GATGACGGTACCTGAAGAATAAGCACCGGCTAACTACGTG

>3012 len=160 tot-seq=3

TGGGGAATCTTGCACAATGGGCGAAAGCCTGATGCAGCGACGCCGCGTGAGTGAAGAAGG

ATCTCGGTTTCGTAAACTCTGTTGTTAGGGAAGAAAAAATGTATAGTAACTATATACAAA

AGAGACGGTACCTAACCAGAAAGCCACGGCTAACTACGTG

>3013 len=160 tot-seq=3

TGGGGAATCTTGACAATGGGCGAAAGCCTGATGCAGCGACGCCGCGTGCGGGATGAAGG  
CCTTCGGATTGTAAAGTGCTGTTATAAGGGAAGAACATTTGCAATAGGAAATGATTGCAG  
ACTGACGGTACCTTGTCAGAAAGCGATGGCTAACTATGTG

>3014 len=160 tot-seq=3

TGGGGAATATTGCGCAATGGGGGAAACCCTGATGGAGCAACACCCGCGTGAGTGAAGAAGG  
GTTTCGGCTCGTAAACTCTGTTGTTGAAGAAGAACGTGCGTGAGAGTAACTGTTACGCG  
AGTGACGGTATTCAACCAGAAAGTCACGGCTAACTACGTG

>3015 len=160 tot-seq=3

TAGGGAATCTCCGCAATGGACGCAAGTCTGACGGAGCAACGCCGCGTGAGTGAAGAAGG  
TTTTCGGATCGTAAACTCTGTTGTAAGAGAAGAACAATTGTAGAGTAACTGCTACAGT  
CTTGACGGTAATCAATTAGAAAGTCACGGCTAACTACGTG

>3016 len=160 tot-seq=3

TGGGGAATCTTGACAATGGGCGAAAGCCTGATGCAGCGACGCCGCGTGCGGGATGAAGG  
TTTTCGGATCGTAAAGCTCTGTTGTTGGTGAAGAAGGATAGAGGTAGTAACTGGCCTTTA  
TTTGACGGTAATCAACCAGAAAGTCACGGCTAACTACGTG

>3017 len=160 tot-seq=3

TGGGGAATATTGCGCAATGGGGGAAACCCTGACGCAGCGACGCCGCGTGAGTGAAGAAGG  
GTTTCGGCTCGTAAAGCTCTGTTGGTAGTGAAGAAAGATAGAGGTAGTAACTGGCCTTTA  
TTTGACGGTAATCAACCAGAAAGTCACGGCTAACTACGTG

>3018 len=160 tot-seq=3

TAGGGAATCTCCACGATGGACGCAAGTCTGATGGAGCAACGCCGCGTGAGTGAAGAAGG  
TTTTCGGATCGTAAAGCTCTGGTGGTAGTGAAGAAAGATAGAGGTAGTAACCGGCCTTTA  
TTTGACGGTAATTACTIONTAGAAAGTCACGGCTAACTACGTG

>3019 len=160 tot-seq=3

TAGGGAATCTCCACAATGGACGAAAGTCTGATGGAGCAACGCCGCGTGAGTGAAGAAGG  
TTCTCGGATCGTAAACTCTGTTGTGAGGGAAGAACAAGTACCGGAGTAACTGCCGGTAC  
CTTGACGGTACCTCATTAGAAAGCCACGGCTAACTACGTG

>3020 len=160 tot-seq=3

TGAGGAATATTGGTCAATGGGCGAGAGCCTGAACCAGCCAAGTCGCGTGAATGAAGAAGG  
CCTTCGGGTTGTAAAGTTCTTTTCGGTATTGAGGAAGGTTGATGTGTTAATAGTACATCAA  
ATTGACGTAAATACAGAAGAAGCACCGGCTAACTCCGTG

>3021 len=160 tot-seq=3

TGGGGAATTTTGGACAATGGGGGAAACCCTGATCCAGCCATGCCGCGTGCGGGGAAGAAGG  
CCTTCGGGTTGTAAACCGCTTTTGTCTGGGGACGAAAAGTCGTATTTAAATAAAGTACGAT  
GCTGACGGTACCTGAAGAATAAGCACCGGCTAACTACGTG

>3022 len=160 tot-seq=3

TGGGGAATTTTGGACAATGGGCGCAAGCCTGATCCAGCAATGCCGCGTGAGTGAAGAAGG  
CCTTCGGGTTGTAAAGCTCTTTTGTCTAGGGAAGAAACGGGGTTGGCTAATATCCGATCCT  
AATGACGGTACCTGAAGAATAATCACCGGCTAACTACGTG

>3023 len=160 tot-seq=3

TGGGGAATATTGCGCAATGGGGGAAACCCTGACGCAGCGACGCCGCGTGCGGGATGAAGG  
CCTTCGGGTTGTAAACTCTGTTATTAGGGAAGAACAATGTGTAAGTAACTATGCACGT  
CTTGACGGTACCTAATCAGAAAGCCACGGCTAACTACGTG

>3024 len=160 tot-seq=3

TAGGGAGTTTTCGGCAATGGGGGAAACCCTGACCGAGCAACGCCGCGTGAATGATGAAGG  
CCTTCGGGTCGTAAATTCTGTTGTAAGAGACGAACGGCAAGGGTAGGAAATGCCCTTG  
TGTGACTGTATCTTACGAGAAAGGGACGGCTAACCACGTG

>3025 len=160 tot-seq=3

TGAGGAATATTGCGTAATGGGGGAAACCCTGACGCAGCGACGCCGCGTGAAGGATGAAGG  
TCTTCGGATTGTAAACTTCTGTTAAGTGGGAGGAAAGAATTGCTTTTAATAGAAGCAAGA  
GATGACAGTACCACTAGAGAAAGCACCGGCTAAATTTGTG

>3026 len=160 tot-seq=3

TGGGGAATATTGCACAATGGACGCAAGTCTGATGGAGCAACGCCGCGTGAGTGAAAAAGG  
TCTTCGGATTGTAAACTCTGTTGTTAGAGAAGAACACGAGTGAGAGTAACTGTTTCATTC  
GATGACGGTATCTAACCAGCAAGTCACGGCTAACTACGTG

>3027 len=160 tot-seq=3

TGGGGAATATTGCACAATGGGGGAAACCCTGATGCAGCAACGCCGCGTGAGTGATGAAGG

TTTTCGGATCGTAAAGCTCTGTCTTTGGGGAAGAACGTGCGTGAGAGTAACTGTTACGC  
AGTGACGGTATCCAACCAGAAAGTCACGGCTAACTACGTG

>3028 len=160 tot-seq=3

TAGGGAATCTTCCGCAATGGACGAAAGTCTGACGGAGCAACGCCGCGTGAGTGATGAAGG  
TTTTCGGATCGTAAACTCTGTTGTTAGGGAAGAACAAGTACGAGGGTAACTACTCGTAC  
CTTGACGGTACCTAACCAGAAAGCCACGGCTAACTACGTG

>3029 len=160 tot-seq=3

TAGGGAATCTTCCGCAATGGACGAAAGTCTGACGGAGCAACGCCGCGTGAACGATGAAGG  
TTTTCGGATCGTAAAGTTCTGTTATCAGGGAAGAACAAGTATCGGAGTAACTGCCGGCAC  
CTTGACGGTACCTGACCAGAAAGCCACGGCTAACTACGTG

>3030 len=160 tot-seq=3

TGGGGAATATTGCGCAATGGGGGAAACCCTGACGCAGCGACGCCGCGTGCGGGATGAAGG  
CCTTCGGGTTGTAAAGCACTTTCAGTAAGGAGGAAAGGTTAAGTTTTAATAGAGCTTAGC  
TGTGACGTTACTTACAGAAGAAGCACCGGCTAACTCCGTG

>3031 len=160 tot-seq=3

TGGGGAACTTTGGACAATGGGCGAAAGCCTGATCCAGCCATGCCGCGTGAGTGAAGAAGG  
CCTTCGGGTTGTAAAGCTCTTTCGCAAGGAAAGAAAATTATCTATTAATACTAGGTGAG  
GTTGACGGTACCTTGATAAGAAGCACCGGCTAACTACGTG

>3032 len=160 tot-seq=3

TAGGGAATCTTCCACAATGGGCGCAAGCCTGATGGAGCAACACCGCGTGAGTGAAGAAGG  
GTTTCGGCTCGTAAAGCTCTGTTGTTGGAGAAGAACGTGCGTGAGAGTAACTGTTCATA  
GTTGACGGTATTTAACCAGAAAGTCACGGCTAACTACGTG

>3033 len=160 tot-seq=3

TAGGGAATCTTCCACAATGGGCGCAAGCCTGATGGAGCAATGCCGCGTGAATGAAGAAGG  
TCTTCGGATCGTAAAGTTCTGTTATTAGAGAAGAACAAGTTGAGGGATAACTATCTCGAC  
TTTGACGGTACCTAACCAGAAAGTCACGGCTAACTACGTG

>3034 len=160 tot-seq=3

TGGGGAATATTGACAATGGGCGCAAGCCTGATCCAGCCATGCCGCGTGTGTGAAGAAGG  
CCTTCGGGTTGTAAAGCACTTTTGTGGGGAAGAAAAGCCATGGGTTAATACCCTGTGGT

TCTGACGGTACCCAAAGAATAAGCACCGGCTAACTTCGTG

>3035 len=160 tot-seq=3

TGGGGAATATTGCACAATGGGCGCAAGCCTGATGCAGCAACGCCGCGTGAACGATGAAGG

TCTTCGGATTGTAACTGCTTTTGTGAGGGAAGAAAAGGTCTGTGTTAATACCATAGACT

GCTGACGGTACCTGAAGAATAAGCACCGGCTAACTACGTG

>3036 len=160 tot-seq=3

TAGGGAATCTTCCACAATGGACGCAAGTCTGATGGAGCAACGCCGCGTGAGTGAAGAAGG

TCTTCGGATCGTAAACTCTGTTGTTAGAGAAGAACACGAGTGAGAGTAACTGTTTCATTC

GATGACGGTAATTACTTAGAAAAGTCACGGCTAACTACGTG

>3037 len=160 tot-seq=3

TGGGGAATATTGGACAATGGGCGAAAGCCTGATCCAGCCATACCGCGTGTGTGAAGAAGG

TCTTAGGATTGTAAAGCACTTTAAGTTGAGAGGAAGGGTTGTAGCCTAATACGCTGTAAC

TTTGACGTTACCGACAGAATAAGCACCGGCTAACTCTGTG

>3038 len=160 tot-seq=3

TAGGGAATCTTCGGCAATGGACGAAAGTCTGACCGAGCAACGCCGCGTGAGTGATGAAGG

TTTTCGGATCGTAAACTCTGTTGCCAGGGAAGAAGGATGAGGAGAGTAACTGCTCTTCA

TTTGACGGTACCTGAGAAGAAAGCCCCGGCTAACTACGTG

>3039 len=160 tot-seq=3

TGGGGAATATTGGACAATGGAGGAAACTCTGATCCAGCAATTCTGTGTGTGTGAAGAAGG

CCTTCGGGTTGTAAAGTACTTTTCAGCGGGGAGGAAGGGAGTAAAGTTAATACCTTTGCTC

ATTGACGTTACCCGCAGAAGAAGCACCGGCTAACTCCGTG

>3040 len=160 tot-seq=3

TAGGGAATCTTCCGCAATGGACGAAAGTCTGACGGAGCAACGCCGCGTGAGTGATGAAGG

TTTTCGGATCGTAAAGCTCTGTTGCCAGGGAAGAACGTCCGTTAGAGTAACTGCTAACGG

AGTGACGGTACCTGAGAAGAAAGCCCCGGCTAACTACGTG

>3041 len=160 tot-seq=3

TGGGGAATATTGCGCAATGGGGGAAACCCTGACGCAGCAACGCCGCGTGTGTGAAGAAGG

TCTTCGGATTGTAAAGCACTTTAAGTTGGGAGGAAGGGCAGTAAAGTTAATACCTTGCTGT

TTTGACGTTACCAACAGAATAAGCACCGGCTAACTTCGTG

>3042 len=160 tot-seq=3

TGGGGAATCTCCGCAATGGACGAAAGTCTGACGGAGCAACGCCGCGTGAGTGAAGAAGG  
TCTTCGGATTGTAAACTCTGTCCTCATCCAAGAGAAGGGAAGGTAGTAACTGACCTTTC  
CAGGACGGTAGATGAGGAGGAAGCCCCGGCTAACTATGTG

>3043 len=160 tot-seq=3

TGGGGAATATTGGACAATGGGCGCAAGCCTGATCCAGCCATGCCGCGTGTGTGAAGAAGG  
CCTTCGGGTTGTAAAGCACTTTTGTGGGGAAGAAAAGCAGTCGGTTAATACCCGGTTGT  
CATGACGGTACCCAAAGAATAAGCACCGGCTAACTTCGTG

>3044 len=160 tot-seq=3

TAGGGAATCTCCACAATGGGCGAAAGCCTGATGGAGCAATACCGCGTGAGTGAAGAAGG  
TCTTCGGATCGTAAAGCTCTGTTGTTAGAGAAGAACACGCAGAACAGTAACTGGTTCTGC  
GCTGACGGTATCTAACCAGAAAGTCACGGCTAACTACGTG

>3045 len=160 tot-seq=3

TAGGGAATCTTCGGCAATGGGGGCAACCCTGACCGAGCAACGCCGCGTGAGTGAAGAAGG  
TTTTCGGATCGTAAAGCTCTGTTGTTAGAGAAGAACAAGGACGTTAGTAACTGAACGTCC  
CCTGACGGTATCTAACCAGAAAGCCACGGCTAACTACGTG

>3046 len=160 tot-seq=3

TAGGGAATCTTCGGCAATGGGGGCAACCCTGACCCAGCCATGCCGCGTGTGTGAAGAAGG  
TCTTCGGATTGTAAAGCACTTTAAGTTGGGAGGAAGGGCAGTAAATTAATACTTTGCTGT  
TTTGACGTTACCGACAGAATAAGCACCGGCTAACTCTGTG

>3047 len=161 tot-seq=3

TAGGGAATTTTCGTCAATGGGCGAAAGCCTGACGGAGCAACGCCGCGTGAGTGAAGACGG  
CCTTCGGGTTGTAAAGCTCTGTTATACGGGACGAATAGTCTTGTGGTTAATACCATAAG  
AAGTGACGGTACCGTAAGAGAAAGCCACGGCTAACTACGTG

>3048 len=161 tot-seq=3

TAGGGAATCTTCGGCAATGGGGGGAACCCTGACCGAGCAACGCCGCGTGAGTGAAGAAGG  
TTTTCGGATCGTAAAGCTCTGTTGTTAAGGAAGAACGTTGGTAGGAGTGAAAAATCTACC  
AAGTGACGGTAACTAACCAGAAAGGGACGGCTAACTACGTG

>3049 len=161 tot-seq=3

TAGGGAATCTCCACAATGGACGAAAGTCTGATGGAGCGACGCCGCGTGAGTGAAGAAGG  
TTTTCGGATCGTAAAGCTCTGTTGTAAGAGAAGAACGAGTATGAGAGTGGAAAATTCATA  
CTGTGACGGTATCTTACCAGAAAGGGACGGCTAACTACGTG

>3050 len=161 tot-seq=3

TTAGGAATATTCGTCAATGGGGGAAACCCTGAACGAGCAATGTCGCGTGAGTGAAGAAGG  
TCCTTTGGATCGTAAACTCTGTTGTATGGGAAGAACAGCCAAATTAGGAAATGAATTTG  
GTCTGACGGTACCATGCCAGAAAGCTCCGGCAAACCTATGTG

>3051 len=161 tot-seq=3

TAGGGAATCTCCACAATGGGCGCGAGCCTGATGGAGCAACGCCGCGTGAGTGATGACGG  
TCTTCGGATTGTAAAGCTCTGTTAATCGGGACGAATGGTTTGTGTGCAAATAGTGCATAG  
ACATGACGGTACCGGAATAGAAAGCCACGGCTAACTACGTG

>3052 len=161 tot-seq=3

TAGGGAATTTTCGGCAATGGGGGAAACCCTGACCGAGCAACGCCGCGTGAGTGATGACGG  
CCTTCGGGTTGTAAAGCTCTGTTGTTAGAGAAGAACGTTGGTAGGAGTGGAAAATCTACC  
AAGTGACGGTAACTAACCAGAAAGGGACGGCTAACTACGTG

>3053 len=161 tot-seq=3

TAGGGAATTTTCACAATGGGCGAAAGCCTGATGGAGCAACGCCGCGTGAACGATGAAGG  
TCTTCGGATTGTAAAGTTCTGTTGTCAGGGACGAACAAGTGCCGTTTGAACAAGGCGGCA  
CCTTGACGGTACCTGACGAGAAAGCCACGGCTAACTACGTG

>3054 len=161 tot-seq=3

TGAGGAATATTGGTCAATGGACGCAGGTCTGAACCAGCCAAGTAGCGTGAGTGAAGAAGG  
TTTTCGGATCGTAAAGCTCTGTTGTAAGAGAAGAACGAGTGTGAGAGTGGAAAGTTCACA  
CTGTGACGGTATCTTATCAGAAAGGGACGGCTAACTACGTG

>3055 len=161 tot-seq=3

TAGGGAATCTCCGCAATGGACGCAAGTCTGACGGAGCAACGCCGCGTGAGTGAAGAAGG  
ATTCGGTTCGTAAACTCTGTTGTTAGAGAAGAACGAGTGTGAGAATGGAAAGTTCACG  
CTGTGACGGTACTTAACCAGAAAGGGACGGCTAACTACGTG

>3056 len=161 tot-seq=3

TGGGGAATATTGGACAATGGGGGAAACCCTGATCCAGCCATGCCGCGTGTGTGAAGAAGG

CCTTTTGGTTGTAAAGCACTTTAAGCGAGGAGGAGGCTCCTGTAGATAATACCTACAGTG  
AGTGGACGTTACTCGCAGAATAAGCACCGGCTAACTCTGTG

>3057 len=161 tot-seq=3

TAGGGAATCTTCCGCAATGGGCGCAAGCCTGACGGAGCAACGCCGCGTGAGCGAGGACGG  
CCTTCGGGTTGTAAAGCTCTGTTCTTCGGGAAGAAGGGCGGGAGGGTGAACAGCTCTTCC  
GCTTGACGGTACCGAAGGAGAAAGCCCCGGCTAACTACGTG

>3058 len=161 tot-seq=3

TAGGGAATCTTCCGCAATGGACGAAAGTCTGACGGAGCGACGCCGCGTGAGCGAAGAAGG  
TCTTCAGATCGTAAAGCTCTGTTGTTAGGGAAGAAGAAGCGCCGTTTGAAGAGGGCGGCG  
CGGTGACGGTACCTAACGAGAAAGCCCCGGCTAACTACATG

>3059 len=161 tot-seq=3

TGGGGAATATTGCACAATGGGGGAAACCCTGATGCAGCGACGCCGCGTGAGCGAAGAAGG  
CTTTCGAGTCGTAAAGCTCTGTCCTATGAGAAGAACGAGTGTGAGAGTGGAAAGTTCACA  
CTGTGACGGTATCTTACCAGAAAGGGACGGCTAACTACGTG

>3060 len=161 tot-seq=3

TGGGGAATATTGCACAATGGAGGGGACTCTGATGCAGCGACGCCGCGTGAGTGAAGAAGG  
TTTTCGGATCGTAAAGCTCTGTTGTAAGAGAAGAACGAGTGTGAGAGTGGAAAGTTCACA  
CTGTGACGGTATCTTACCAGAAAGGGACGGCTAACTACGTG

>3061 len=161 tot-seq=3

TGGGGAATATTGCACAATGGAGGGAACTCTGATGCAGCGACGCCGCGTGAACGAAGAAGG  
CTTTCGAGTCGTAAAGCTCTGTTGTTAGAGAAGAACGTTGGTAGGAGTGGAAAATCTACC  
AAGTGACGGTAACTAACAGAAAGGGACGGCTAACTACGTG

>3062 len=161 tot-seq=3

TGGGGAATCTTGCACAATGGGCGAAAGCCTGATGCAGCGACGCCGCGTGCGGGATGAAGG  
CCTTCGGGTTGTAAACTCTGTGATTCGGGACGAAAGATAAGCAGACGAATAATCTGCAT  
AAGTGACGGTACCGAAAAAGCATGCCACGGCTAACTACGTG

>3063 len=161 tot-seq=3

TGGGGAATCTTCCGCAATGGACGAAAGTCTGACGGAGCAACGCCGCGTGAACGATGACGG  
CCTTCGGGTTGTAAACTCTGTTGTCAGGGACGAATGTACTAATCTATAATACATTTTCGG



CATCGACGGTACCTGACGAGGAAGCCACGGCTAACTACGTG

>3064 len=161 tot-seq=3

TGAGGAATATTGCGCAATGGGGGAAACCCTGACGGAGCAACGCCGCGTGAGTGAAGACGG  
CCTTCGGGTTGTAAACTCTGTGATTCGGGACGAAAGATAAGCAGACGAATAATCTGCAT  
AAGTGACGGTACCGAAAAAGCAAGCCACGGCTAACTACGTG

>3065 len=161 tot-seq=3

TGGGGAATATTGCACAATGGGCGCAAGCCTGATGCAGCGACGCCGCGTGAGGGATGGAGG  
CCTTCGGGTTGTAAACCTCTGTTGGTAGAGAAGAACGTTGGTGAGAGTGGAAAGCTCATC  
AAGTGACGGTAACTACCCAGAAAGGGACGGCTAACTACGTG

>3066 len=161 tot-seq=3

TAGGGAATCTTCCGCAATGGACGAAAGTCTGACGGAGCAACGCCGCGTGAGTGATGAAGG  
CCTTCGGGTCGTAAAGCTCTGTTGTTAGGGAAGAACAAGTGCCGTTTGAATAAGGCGGCA  
CCTTGACGGTACCTAACCAGGAAGCCACGGCTAACTACGTG

>3067 len=161 tot-seq=3

TGGGGAATATTGCGCAATGGGGGAAACCCTGACGCAGCGACGCCGCGTGCGGGATGAAGG  
CCTTCGGATCGTAAAGCTCTGTTGTAAGTCAAGAACGAGTGTGAGAGTGGAAAGTTCACA  
CTGTGACGGTAGCTTACCAGAAAGGGACGGCTAACTACGTG

>3068 len=161 tot-seq=3

TAGGGAATCTTCCACAATGGACGAAAGTCTGATGGAGCAACGCCGCGTGAGTGAAGAAGG  
GTTTCGGCTCGTAAAGCTCTGTTGGTAGAGAAGAACGTTGGTGAGAGTGGAAAGCTCATC  
AAGTGACGGTAACTACCCAGAAAGGGACGGCTAACTACGTG

>3069 len=161 tot-seq=3

TAAAAAATCTTCCGCAATGGACAAAAGTCTAACGGAGCAACGCCGCGTGAACGATGACGG  
CCTTCGGGTTGTAAAGTTCTGTTATACGGGACGAATGGCGTAGCGGTCAATACCCGTTAC  
GAGTGACGGTACCGTAAGAGAAAGCCACGGCTAACTACGTG

>3070 len=161 tot-seq=3

TGAGGAATATTGGTCAATGGACGCAAGTCTGACGGAGCAACGCCGCGTGAGTGATGACGG  
CCTTCGGGTTGTAAAGCTCTGTTAATCGGGACGAATGGTCTTTATGTGAATAATGTAAAG  
ATTTGACGGTACCGGAATAGAAAGCCACGGCTAACTACGTG

>3071 len=161 tot-seq=3

TGAGGAATATTGGTCAATGGGCGAGAGCCTGAACCAGCCAAGTAGCGTGCAGGATGACGG  
CCCTATGGGTTGTAAACTGCTTTTGTGAGGAAAGAAAAGGTCTGTGTTAATACCATAGAC  
TGCTGACGGTACCTGAAGAATAAGCACCGGCTAACTACGTG

>3072 len=161 tot-seq=3

TGGGGAATATTGGACAATGGGCGGAAGCCTGATCCAGCCATGCCGCGTGTGTGAAGAAGG  
CCTTTGGTTGTAAAGCACTTAAGTGGGAGGAGGCTTACCTGGTTAATACCTGGGATA  
AGTGGACGTTACCCACAGAATAAGCACCGGCTAACTCTGTG

>3073 len=161 tot-seq=3

TGGGGAATATTGCACAATGGGCGAAAGCCTGATGCAGCGACGCCGCGTGAGCGAAGAAGG  
TTTTCGGATCGTAAAGCTCTGTTGTAAGTCAAGAACGAGTGTGAGAGTGAAAGTTCACA  
CTGTGACGGTAGCTTACCAGAAAGGGACGGCTAACTACGTG

>3074 len=161 tot-seq=3

AGGGAAAACCTCTCAGGACCCAGAAGTAGTGTATGAAATCTCTTGTGAGGGACAAACAT  
TCAGAACCTTGTAGCAGTGTCTGGAATCCTTTCTGAAGAGAAACATTCAGACCCTCATA  
GCAGTGTCTGGAATTCTATGTTAGGGACAAACACTCACCC

>3075 len=161 tot-seq=3

TGGGGAATATTGGGCAATGGGCGCAAGCCTGACCCAGCAACGCCGCGTGAGTGAAGAAGG  
TTTTCGGATCGTAAAGCTCTGTTGTAAGTCAAGAACGGGTGTGAGAGTGAAAGTTCACA  
CTGTGACGGTAGCTTACCAGAAAGGGACGGCTAACTACGTG

>3076 len=161 tot-seq=3

TGAGGAATATTGGTCAATGGACGCAAGTCTGACGGAGCAACGCCGCGTGAGTGAAGACGG  
CCTTCGGGTTGTAAACTCTGTGATTCGGGACGAAAGATAAGTAGACGAATAATCTGCAT  
AAGTGACGGTACCGAAAAAGCAAGCCACGGCTAACTACGTG

>3077 len=161 tot-seq=3

TGGGGAATATTGCACAATGGGCGCAAGCCTGATGCAGCCATGCCGCGTGAACGATGAAGG  
TCTTATAGATTGTAAAGTTCTTTTATATGGGAAGAAACGCTAAAATAGGAAATGATTTTA  
GTTTGACTIONTACCATTGAATAAGTATCGGCTAACTATGTG

>3078 len=161 tot-seq=3

TGGGGAATATTGGACAATGGGCGAAAGCCTGATCCAGCCATGCCGCGTGTGTGAAGAAGG  
TCTTCGGATTGTAAAACCTCTGTTATACGGGACGAAAAAGACGGATGCCAACAGTATCCGT  
CCGTGACGGTACCGTAAGAGAAAGCCACGGCTAACTACGTG

>3079 len=161 tot-seq=3

TCGAGGATCTTCCGCAATGGGCGCAAGCCTGACGGAGCGACGCCGCGTGTGGGATGAAGG  
CCTTCGGGTTGTAAACCACTGTCACTCGTTAAGAAAGGGTCCGGCGTTAACAGCGTCGGG  
CACTGACGAAGGCGAGAGAGGAAGCCACGGCTAACTTCGTG

>3080 len=161 tot-seq=3

TAGGGAATCTTCGGCAATGGGGGCAACCCTGACCGAGCAACGCCGCGTGAGTGAAGAAGG  
TTTTCGGATCGTAAAACCTCTGTTGGTAGAGAAGAACGTTGGTGAGAGTGGAAGCTCATC  
AAGTGACGGTAACTACCCAGAAAGGGACGGCTAACTACGTG

>3081 len=161 tot-seq=3

TGAGGAATATTGGTCAATGGACGAGAGTCTGACGGAGCAACGCCGCGTGAGTGAAGAAGG  
TCTTCGGATTGTAAAACCTCTGTTATACGGGACGAAAAAGGCGGATGCCAACAGTATCCGT  
CCGTGACGGTACCGTAAGAGAAAGCCACGGCTAACTACGTG

>3082 len=163 tot-seq=3

CCCAGTGAGCACACACGTGTAGCTCAGAAGATAGCAGTGCTTCCAGGCTTCCAAGTCTGC  
ACTCAATCACTAACAAAAAGGCAGAGGGTCTAGAGAACAGGGCCACAATTCCTAATTAAG  
TCGTTTTATTACAACAATACTTAAAGTATTGTTACTACCCTC

>3083 len=163 tot-seq=3

TCGCTTGCCTGGTTCTGGGATATGAGTGTGTCCAGGATGTGTGGTCTCATCTTCTCCCTG  
CCTCTCCGCAGTTGTGCTGGTACGGGAGTGTCTCTGCAGTGGGCCTGTTAATTGGTGCTT  
CAGCTGGCTGATTGACTCTAATGCGGGTGAACATTTATTTACC

>3084 len=163 tot-seq=3

CACATCAAAAAGTTAATACACCGTGATAAAGCAGGCTTTATTCCTGGGATTCAAGGCTGG  
TTCAACATATGCAAGTCAATAAATGTATTCACCATATAAACGGAATTAATGCAAAAAGC  
TTATGATCATCTCAATAGACATAGAAAAAACTTTGAATAAAAT

>3085 len=164 tot-seq=3

CCACCTGCCATTTGTCCACTGGGTTTCATGCCTACCCCATGACTGCAGGCTTCTTCATCTC

GTCTTATCCGGCACAAGTGAGCAGGAAGCAGACCCAACCGAGAGGATTCCAAGTTACATC  
ACCCTGTGCTCTGCCTATATTGCTGGTCTTTGCTCTCAGAAGTT

>3086 len=164 tot-seq=3

AGGTTAGGAATATTCGTCAATGGGGGAAACCCTGAACGAGCAATGCCGCGTGAATGAAGA  
AGGCCCTATGGGTTGTAAAATTCTGTTGTATGGAAAGAAATGTAAAGTTAGGAAATGAAC  
TTTACTTGACGGTACCATTCAAGAAAGCCACGGCTAACTACGTG

>3087 len=164 tot-seq=3

CGCTGCAATGATGCCAACGAAGAAGGTCATGGACGCAAAGCGCAAGCCACAAGAGGTGCC  
GGAAGGGCTGCAGGCAGGCGTGC GGATGGCGGACGAAAGAATGGAAAAAGCGTGAAACGC  
CCCTCTTATCAGCAGCAAGATACCGGCGACTGGCGACAGTTCTT

>3088 len=165 tot-seq=3

AAAAAAAGTCTACTCAGGAGCTGAATTTAATAAAATGAGCACTTTTGACTGCTTTGTGAA  
GCGTGGCATTTTTTTTTTTGTTTTTTGCTGTGAGTTCATGGTAGTAAAGAACATGAGTG  
ACATGACTGCGCAGTCTGGCCCGAGTTCATGCCATTGTGGTTGCC

>3089 len=166 tot-seq=3

CTATTATAACTGTTCCATTCTTTCAACCTTATCTGTGTGGTTTGAAGTCTGTTCCAAGTA  
AGTG TAGTTGAGGCACCAGCCAAGGATTAGGGAAGAGTTTGTGTGCAGAAATTTAGGACTC  
TCCCTTTCTGAAAATCTCCTTCATGTAATTTCTCCTCTCTCACTTC

>3090 len=166 tot-seq=3

AAGAAGTAGGGAATATTA AAAAATGGAAGAAAGTATGATGGAGAAACGAAGAGTGAGTGA  
AGAAGGGTTTCGGCTCGTAAAGCTCTGTTGTTGGTGAAGAAGGACAGGGGTAGTAACTGA  
CCTTTGTTTGACGGTAATCAATTAGAAAGTCACGGCTAACTACGTG

>3091 len=167 tot-seq=3

TTTCCCGCCAGTCCTGTGTGTTCCAGACTAGACTTTCCCTTCTCACCTCTCTACATAGT  
CATTCA TTGATTAGAGGCAAAGTGTTGACTTCCAAGAAAAGTGAAGTGTACCCAGGATA  
AAGGTGATGAAGTTGATGCAGGGTTCAGAGAGGCTCCTGTGACTGAA

>3092 len=167 tot-seq=3

AAGCCGATAACGTAGATGTCGCTTTCGCCCCGTATCTAAATTACGGATGACGTTCAAGCCA  
TTCAGCATGATCGTCACGGTAATGATGGCGAATACTCCCCAATAACCGGTGCGGGAATC

GCTGCCAGAAACGCTGACAACCTAGTAAAGAAGCCGAGGAGAATAAA

>3093 len=167 tot-seq=3

TGGGGAATTTTGCACAATGGGCGGAAGCCTGATGCAGCGACGCCCGTGAGTGAAGAAGG

GTTTCGGCTCGTAAAGCACTGTTGGTAGTGAAGAAAGATAGAGGTAGTAACTGGCCTTTA

TTTGACGGTAATTAAGTACGAAAGTCACGGCTAACTACGTGCCAGCAG

>3094 len=168 tot-seq=3

GTGGAGGACGACTCGGTGCAGCAGCCACTGTGGAGACGACCTGGTGGCTCCTCAAAGACA

CGCACAGATCTCCATCCGACCCAGCACGACCACTCCAGCTATGTATCCAGGTGGAGTG

GAAGCCCGCAGCCACGCAGAAGCCCGTGCAGACGCCCGCCGTGGACT

>3095 len=168 tot-seq=3

GTGTGCTCTTCCGATCTCCTCCGGGAGGCAGCAGTGGGGAATATTGGACAATGGGCGCAA

GCCTGATCCAGCCATGCCGCGTGAGTGATGGAGGCCTTAGGGTTGTAAAGCTCTTTCAGT

AGGGAAGATAATGACGGTACCTACAGAAGAAGCCCCGGCTAACTTCGT

>3096 len=168 tot-seq=3

GGATGCCTCTCAGGTGCAGCGTAGCCTTGACCTACTATGCAGGGCGAAGCATCCTGGTGG

AGCCACACAGCTCCGGGTTCTGGTGGCCCTGCTCGGGCGAGGCAGCTCCGTGAGCTGAGG

GCCATTCTTCTGAGAAGGGGCAGCTGTGTGCTTTAGCAGCTGACATTC

>3097 len=168 tot-seq=3

TATAGCCCTGTACACTATGGTGACTAACCAGAAATGGGCATTCTGTAAATGCTAGATACA

AAATAAATAAATAAGGAGGCATTTTTTTTTCTAGCTTCAGATAGATTGATAGCCTGTAAC

GGGAGAATATGGGCTTGGCAGAATCCTACCTGCACCAGAAGTGAACAC

>3098 len=168 tot-seq=3

TTGGCTGGACTCACGGGACAGTGACAGGCAGTTGACATGAGGCCCTGACAGTCTGTCTT

GAGCCGCAGCCAGATTAATGTTGCTGAAAACGTACCTTCCCATAGCACAACCCATCACCC

TCACAACCGCCCTGCAAGCTCCCCTGAACAGTGTGACCTCCTGTCCAT

>3099 len=168 tot-seq=3

TCGTGTATGGGGAATTTTGCGCAATGGGCGAAAGCCTGACGCAGCAACGCCCGTGAGG

ATGAAGTTTCTCTGAATCGTAAACTCCTGTGCGCCGGGAAGAATAGACGGAGTGCTAATC

AACTCCGGCTTGACTGTACCGGCAAAGGAAGCCCCGGCTAACTCCGTG

>3100 len=169 tot-seq=3

AAGGCGGGCACCAAAGGATAGGCACCCGGAAGGTGGACTCCGAGGAGGAGAGAGGACAGG  
GGTCTCTACCCCAGCTCCTGGTCACCATGCTGCTGGCTGTGCTGCTGCTGCTACCCCTC  
CCAAGCTCATGGTTTGCCACGGGCACCCACTGTACACGCGCCTGCCCC

>3101 len=170 tot-seq=3

GTGGAGAGTTGGGTAGGGAGATCTGTGAGGGAGGGGCTTGTGCAGGAAGGAGTTAGGTT  
TACTGATTGAAGTGGGAAGCCATTAGAAAGATCGCCCTGGTGCTTTGTGGAGAACAGTT  
CACAGCAAGAAAGCAGGGAGACAGGTTAGGGGCTCTCGCAGCGATTTAGG

>3102 len=171 tot-seq=3

TTTTTTTTTTCAAGCAGAAGACGGCATAACGAGATAAACTGTGACTGGAGTTCAGACGTG  
TGTCTCCGATCTCCTACGGGAGGCAGCGGCCAACGGCTTGACTTCTCTGGCCACTGAGG  
CCACAACCTGGGCACTCCCTGCTTTCTCTCCATCTCTCACATCCACGGTCCC

>3103 len=171 tot-seq=3

TTTCCTTGACCCAGAGAGAGTGTCTGGAGAGGGCAGCCTGCCAGCAGCAGTGGCCAGGG  
GATTCAGTCACCGCTGGCCACAGGGGAGGGGAATGGGGTGATAAATAGCCCATCACTCT  
CTCCCTTCGCCCTCTGATCTCTTGCTAGTGCATCTAATTTGCCACCTCTAA

>3104 len=172 tot-seq=3

GCTGGAAGAAATCTGCTGTTTGAGAAGTGGAGGAAACGGGCTGGAGAGGAGAGATAACAG  
CCCGTTCTCTGTGTATCTGCATGCGTCTGCCGGCGAGGGTGGCTGGAGCCGGGCGGTCTG  
AGGCCATATCTAGCGAGATTTTTGTTCTGGGTTGTGAAAGTGACCTATGGAG

>3105 len=172 tot-seq=3

GATGAGTGTGAGGCAGTGGAGGCACTGGAATCCAGGCAGGAGAAGGGAGAGGCAGAGGAA  
GGCTCAGGTCCAAGTTGGTCTATTTTCTCAATCTACCACCAACCAGCTCTTTCTGCAACT  
ATGGTGAGGTTATTCTAATCCATTTTCTCCATGACCCATTAAAGGTAGCCA

>3106 len=172 tot-seq=3

GGCAGCCGGCTTTGGACAACCTGACTCTCTGGGAGGACTTGGAGTCCCTTCCTATGAGTGG  
GTCCTTCCCTCTCAGGCTGGCAGGGAGTGCCCAACTTCTCCCTTTGTCACTCTTCCCA  
CAGGGTGTGTCTGGGCAGGCAGAGGGTGTGTGGCTCAAGCACTTGGTTGGA

>3107 len=173 tot-seq=3

ATGATTATAAAAGTGTGGTTGTTGTCCAGCTCAAGAAGAGGGAGGATCTAATTCTACACA  
ATAAAATAAACTGGGGAGGAACAGCGAGGAAAGCCCCAGGAAGTAATGGAATTGGAAAA  
AGAGCTGATATACGCACTCGGATTTGCTGAGTAAGAAAAACATCACGAGGTAG

>3108 len=174 tot-seq=3

CTCTCAGTGACCTGTTTGTCCACCACCAGTGTGAGCCACCTGGCAGTCACCTGAAGCCTC  
CCTCACCTCCAGTCTAGTGAAGCTCCCCAGGTTCTCAATCACCTGTTGCCTGGGCTT  
TGTAAGTTTCTTAATCTCCCTCCTTCTAGTTTTGTCCCTACAATCCTGTTCCAC

>3109 len=174 tot-seq=3

CCCCAGGGGGCCGTGCAGAGCCGGGGGTTGCCTCAAGCCTGACTCAGCAGGGGAGCGGAT  
GGGAGACTGGGCAGGGGCCCGTGGGGGGCTCGGTTTGGGGCCCCTGACCCATTCCCTCAG  
GCTAAGCGAGCTACACTCCACCCCGTCACTGACCACATGGCTCTCCTACCAGC

>3110 len=175 tot-seq=3

GGAGGGAGACATGTGTGCGGGCCTGGAGGGCGACAGTTCCTCTGCATCCCATGCCAAAGG  
AAGAGCAGGAAGACCCAGGAGATGATAAGCTTGGAGCCAACTGTGGTCATCACTGGGAGG  
GGCAAAGCGAGCAACTGAGAGCCCCAAAGAGACAGGGGTCTTATTGTCACTACCT

>3111 len=175 tot-seq=3

TGAGGGTGGAGGGGCATGGACTTGGTGTCCAGCCAGGATCCACTGGCCTCAGCCTCTGGA  
AAACGGGGTATCATGAGCTTTAGCACAGGTCATAAATAGGGTGGGGTCCCTGGAAGAGG  
ATCTGAGGACCATCCCTGGGGATTCGTCCAGCCACCATCCAGCTGCCATGACTC

>3112 len=175 tot-seq=3

ACGGACTGAGGGTGGGGCCACCAGGGGACTTGCTCACTTCCAGGGGGCCAGGCGGTGAG  
TGGGCCACTGCAGCATGGTCAGCACTGACGGAGTCCTTGATAGTGGGGAGGGGTCTCCAA  
TCGGCAGGGAGGGCTCTCCAATCAGCAGAGAGGGGCTCCCATGACCTCTGTCCAA

>3113 len=175 tot-seq=3

ACACATTAACAGATCAACAATCGTGATCCTTCATCTGGACGCTTTCCTTCTGCACTCTTC  
CCCAGTCACCCGTCCTGGTTTTCTATCAGCTGCCAAAGGCACAGCTTTGATGTTAAGAT  
TAAGATTGCAGCGAAGGAAGATGGGAAGGAATCTTTGCTGGGAGCTCGCAGTCAG

>3114 len=176 tot-seq=3

AATGGGGGAGGATGGGAAGGGATTCTAACATGTCAACAAATGGCAGTTTTCTCAGAATAC

TGGATGACTTAGCATAAAAGTGGAGTGAAGACTGTGCTTCTGAAATGTTGAACATTGTTT  
AATAATTTGGCACTGTACGTTGAGAGGTTTCTGTCAACACTGTCAACATCCAGACT

>3115 len=176 tot-seq=3

AGATCTGGGAGAGGTGGCAGGGAGGGGATGTCACCCTGTGTCTTAGTCCTCAAAGAAGGC  
TTCGCAGAGGTGGTGTGGAAAGAGGCCGTCAGCTCTGGCCCAGTGGCCGTGGGCATGCGC  
CTTTCCTCCTCTGAGCTCAGTGTCCCTTTTATGATGGGCCACCAGCACCTGCCGT

>3116 len=176 tot-seq=3

GCAACTGGGAAGTGTCTGGTGCTGTACCTCCCTGGTTGTGAAAACAGCAGCATACTCAG  
GTTGTGCATCATCGTGTACTGTCACGGGATAAAAGGGCTCCTACCCTGGGCTTCTCATC  
CACAGCATCCTTAGGAGCAGCCTTCTTCTCCTACCTCCTCTGCATCTGGTGAGTGG

>3117 len=176 tot-seq=3

GTAGTTTGTTTGTTTGTTTGTTTGTAGTTTGTCTGTTACTGTTTTTGGTTTCTAGC  
ATTAGATTACCAGAATTTCCATCTCTGTGCTTACATTATCCATCTGTTTCTTGCATGTTG  
CCTACTTTTCCATTTGAGCCCTTAACAATGATTTTTGAATTCCTGTCTGGTAAA

>3118 len=177 tot-seq=3

AGCCAGCTATAGACACCATCCCCCAGCAGGGCCCAATGTCTCCACTAGGTGGTGTCTC  
CTCACTTCCATGGCCTACAAACCTCCCTGCTAATGCACACAGTGGCTGGGCCATGGG  
TTGGCAGTGGCTGACTGGTCAGCAGGTACGTGCCTGAGTGAGGCTGGCCTGTCAGCC

>3119 len=177 tot-seq=3

TGAAAGGGCGGCCAGGGAGGGCAGGTGCCACATGTACCTGAACCCATGCTCCTCCCTGAA  
GCGCTGTTTATCTGTGCAATGGTAGGTATAAGGGGGCAGGGACCAGGGACCTACCTGCTA  
CACTGTCCTTGGTCACCAAGGCAGGGCCCAGAGGGCAGAAGGTGTGAAGGTTTTTC

>3120 len=177 tot-seq=3

CGGGGGCGCGGCCGAGCGCCGACGGGAGGCAGGGGGGAAGAGGGCGCAAGGGGGGAA  
ACCCGGACGCAGCGACGCCGCGTGCGGGATGAAGGCCTTCGGGTTGTAAACCGCGTTTGA  
TTGGGAGCAATCCTTCGGGTGAGTGTACCTTGCGAATAAGCGCCGGCTAACTACGTG

>3121 len=177 tot-seq=3

TCAAAGGGCAGCCAGGGAGGGCAGGTGCCACATGTACCTGAACCCATGCTCCTCCCTGGA  
GGGCTGTTTATCTGTGCAATGGTAGGTACCAGGGGGCAGGGACCAGGGACCTACCTGCTA



CACTGTCCTTGGTCACCAAGGCAGGGCCCAGAGGGCAGAAGGTGTCTGAAGGTTTTTC

>3122 len=179 tot-seq=3

GGAAGAGATAGTGACATTGAGACTTAGTATAGCAGTTGTTAATACATTATCATTGCAGTG  
CAGGTCATCATTACAGCCTGACTTTCAACTGCTAGAGGGCTTTCCTTGGGAGCTACAGCC  
TGTTCTGCTTCTGTGCCAGGCAGGCCAGCAGTGCTGGAGAATTAGTGCCACTCACATCC

>3123 len=179 tot-seq=3

AGTCCCCTCTTATGTATTTACCTAGAGAAATGAAAGCACATGTTTACACAAAGAGCTGC  
CATAAATGTTACAGCAGCTTTATTTGTAATAGCTCCAAATTGGAAACAATGCTGATGTC  
CAGCAGCAGGTGAATGGGTAACTAACTTGGTAATCCTACAATGGGATACTACACCCAG

>3124 len=180 tot-seq=3

TGGGGAATATTGCACAATGGGCGCAAGCCTGATGCAGCCATGCCGCGTGAGCGATGAAGT  
ATTCGGTATGTAAAGCTCTATCAGCAGGGAAGAAAATGACGGTACCTGACTAAGAAGCA  
CCGGCTAAATACGTGCCAGCAGCCGCGGATTGACAGATCGGAAGAGCGTCGTGTAGGAAA

>3125 len=180 tot-seq=3

GGGACTGTGCAACTGTGCAGCAGGTCTGTGTCCTATCCCCGTCCACATTGGAAGCTCTCA  
TAGGGCAAGGCCTGGGAACTGAGCAGTTCTCTGCATGCTCCTTTTGAGAGCATCCCAACT  
TCTGTAGGGTCTTGATCTTCATCCATAATGATGACTGGGTTCAATTTACCTCACCTTACTC

>3126 len=181 tot-seq=3

TGAGGAATATTGGTCAATGGACGAGAGTCTGACCGAGCAACGCCGCGTGAGTGAAGAAGG  
TTTTCGGATCGTAAACTCTGTTGTTAGAGAAGAACAAGGATGAGAGTAACTGTTTCATCC  
CTTGACGGTATCTAACCAGAAAGCCACGGCTAACTACGTGCCAGCAGCCGCGGAATACGA

A

>3127 len=181 tot-seq=3

GCAGATAACAATTACCTTGTCTCCTTGAAGCCAGGATCTCCTGACACACCTGGCACCCC  
TTGTTACCCTGAGTACACACCAGCAAAGAGATCATAAGGAGAGAGCCAGCAACTTGCAA  
GCTTCCCCCTCACCCCGAACAGAGGACCCCATGGAGCCTCATGGAGGCTGCTCTTGTG

G

>3128 len=181 tot-seq=3

AGCTAACTGCTTTAATTGGGCCTTCGGGGTGTGGAAAGTCAACTTTCTTGCCTGTTTAA

ATAGGATGAATGATGATATTCCAAACATTCATATTAGCGGTGATATTCAGTTTGAAGGAC  
AAAACATTTATGGTTCTAAGGTGGATTTGGTAGAATTACGTAAAGAAGTTGGGATGGTAT  
T

>3129 len=182 tot-seq=3

TGGGGAATATTGCACAATGGGGGAAACCCTGATGCAGCGACGCCCGTGAGCGAAGAAGG  
CCTTCGGGTCGTAAAGCTCTTTTATATGGGAAGATAATGACGGTACCATAAGAAAAAGCC  
CCGGCTAACTACGCGCCAGCAGCCGGGTAATGCCAAGATCGGAAGAGCGTCGTGTTGGGG  
AA

>3130 len=183 tot-seq=3

TGGGAATATTGCACAATGGGGGAAACCCTGATGCAGCGACGCCCGTGAGGAAGAAGGT  
CTTCGGATTGTAAACTCCTGTTGTTGAGGAAGATAATGACGGTACTCAACAAGGAAGTGA  
CGGCTAACTACGTGCCAGCAGCCGCGGTATATCGAGATCGGAAGAGCGTCGTGTATGGGA  
ATA

>3131 len=183 tot-seq=3

GAAACAGCCCTTGGACTCTGACCATGTGTTCTTTGAACAAAAAAGTCGGGATCATAACTC  
TCTGAGTATAACTCGAACAGCTTGTGAAAGGATGGGAAATCCAACATAAGTGGGCTGGTA  
GAACCAGAAGGTGGAACCACAGTCGGGTGGTTCAGGCACAGAGGCTCCCAGGGTGTAC  
AAG

>3132 len=184 tot-seq=3

CCCCAGCTCCTGTGCCCTTCCCCCTCCAGGCTGGCTTCTTCAAGCGGAATCGACCGCCTC  
TGGAGGAAGATGAAGAGGAAGAGTGACAGCAGAGGGGGCGGGGTTCTGGTGGGAAAGCT  
GGGTACCTGCTTCTGTTTCCAGCCAGTTGCCTTTGCTCAGAACTCCATGGGGGTCTTCC  
CTTT

>3133 len=184 tot-seq=3

GGGGAGGCAACGAGTGTGCTTTTCAGTACATTAGGACGTCTATTAGTCATCCAAGTGGAG  
ACGCAGATGCAATGCTTAAGAAATGAGTCAAAGAACTTTAGAAACAGAAGCGGCTTTAGA  
GAGCGCCAACCCAGGAGTCCCTGCCCGGCAGAAAACGAGGGGATGGTGGACCTCGAAGCC  
TCTG

>3134 len=184 tot-seq=3

AGTGAGGCGAGATCATGCCACTGCACTCCAGCCTGGGCAACAAGAGCAAACTCCTTCTC  
AAAAAAAAAAAAAAAAAATCAGATAATGATCATAGTATCTGGTTTTAACATCATATCAAGGA  
AAGTGGCACTGAAGAGGGTAGGAAGGACAGTCTTGCACTGCCCATACCATCCCTCACCCA  
GCCC

>3135 len=185 tot-seq=3

CTGGAGTTCAGACGCGTGCTCTTCCGATCTCCTACGGGAGGCCGAGTGGGGGATATTGC  
ACAATGGGGGAAACCCTGATGCAGCAACGCCGCTGAGGGATGAAGGTTTTCGGATTGTA  
AACCTCTGTCCTTAGGGAAGAAAAAATGACGGTACCTAAGGAGGAAGCTCCGGCTAACT  
ACATG

>3136 len=185 tot-seq=3

CAGTATTCTGGAATCCTATGTGAGGGAGAAACATTCAGAACCCAGTCACTGTGTGCTGGA  
ATCCTATGTGAGGGAGAAACACTCACAACCTCAGTCACTGTGTGCTGGAATCCTATCTGAG  
GGACAAACATTCAGACATGTGTAGAAGTGTCTGGAATCCTATGTGAGGGACAAACACTG  
AGAAC

>3137 len=185 tot-seq=3

GATGCCGATGGTAGCCCAATTGTGTAGCCGATGATCAACTGCTGAATCGTGACCACCAG  
GTGCGGCAAGATCGTGGGGAAGTTCGTTACAAGCGCGCTCGCGATGGCGCTGGGCGCGGG  
AAAGACGTACGAAGGCACCTCGAAGAAACGCACCAGAACTCGAGCCCCAGGATGATGAC  
GACGG

>3138 len=186 tot-seq=3

TCTGTTTTGAGGTAGAGGTGATGTTATGTGGACATGAGAGGAGGAGAGGAGTCAGGGATG  
ACACTGGGGCATTGTCTGAGCAGCTGTGTCCTGGAGGAGCCCAACCGGGGGATGCAGG  
AGCAAGAGGTGGGTTTTGGCCAGTGTGTCGGAGAGGCCCGTGAGCCTCCCAGGGGGAGAT  
GCTGAG

>3139 len=188 tot-seq=3

CACAGGATGGGCCACTTCAATGATCTCAAATGACAAAAGGAACTCACATGCCCTGGGTTC  
AGACTCCGCCCCATCGCTTACGTCAATTCGCCCATCTGACAGCAGTCTGTGAGGTCGG  
GGCTGTTGAGTGACTTTTTCAGGGTGGTGTAAGTAACATCAACCACCCCCCAACTGG  
GATTCACA

>3140 len=188 tot-seq=3

AAGCCACTGTGTCTAAGTGAGGACACAGGAAGCATTACGCGTTCCTGAGAACTTGCAT  
AAAGCGAATGTGTGGCCAGAAAGTTGACTCCCAGAGAAGACCCTCCTAGTTCCACTCTAA  
GCCAGAAATAGCTGCACACATTTGAGAAGACACCACAGCCCCAACACTCTGACCCCCGTG  
TACTTTCC

>3141 len=188 tot-seq=3

GGTGAGAAGGATGGAGAGGAGGTCTGGATTGGCAAATGAAAGATGTACAGTGTAGCTTCT  
CCTGATCTTTGTTACCAGTTCTGCTTCTAACAGCCTTTTCTGTCACTATTTTTAACTCCA  
ACAGCCTCATGAATGGTCTGCTTGCTTGCATGCACTGTTGCCCTTATAGCACAACCCCT  
TTTTTCCC

>3142 len=189 tot-seq=3

GCCAAAGGGGCCTTGATCAAGCTGGTTGCAACCATGGGAATGGAGCTTCACTCCACAGAG  
ACTTCAGTGATCCACAGGGTAGACCATGGGCCTCAGAGCTATCCTACCCAAGTACTCCCA  
AGTACTATCCTACCCTGGTACTCCCAGCAGCCATTGGTTGAGAGCAGTAGATATCCTACC  
CAAGTACTC

>3143 len=190 tot-seq=3

CCCCAACAGCCCAGCAGCCTCTCAGAGGGTCTCTGCATGGGCCTGGGATTAGGGCCCC  
TGCCCAACACCCCAGCAGCCTCTCAGAGGGTCTCTGCATGGGCCTGGGATTAGGGCCCC  
TGCCCAGCACCCCAGCAGCCTCTCAGAGGGTCTCTGGACGGGACTGGGATTAGGGCCCC  
TCCCTGAACT

>3144 len=192 tot-seq=3

CACAGCAGGCATGTTCTGGAATCCTCTGTGAGGAAGAACCATTCAGACCCTCGTAGCAGT  
GTTCTGGAATCCTATATGACAGACGAACATTTAGACCCCAGCAGCAGTGTCTGGAATCC  
TGTGTGAGGGACAAACATTCACACCCTCGGAGCAGTGTCTGGAATCCTATAAAGGGACA  
AACACTCAGAAC

>3145 len=193 tot-seq=3

CAGTGACCGTGGGGCTGGTGGCCTGGGCTGGGGTGTGTTGACTCCAGTCAGCCCATCTGCC  
AGGCGGGCCCAGTCTACCACGCCTATTCGCTCTGATTCTGCCAAGGACCCTGCCTCCC  
TCCTTGCAGGCTCAGGAGCCTCCATGGCCCCTGGATGAATCTCCCACTTGCCTAGCAATC

AGAGTCCTCTTCC

>3146 len=194 tot-seq=3

GGTTGGGGGCCGCATCGTTGTCTCCAGGCCAAACAAGTCAAAGAATCCCTTTCTGCCTCCT  
CATCCCCAGACAGGCTTCTGAGTACCTTTCATCACACACTAATCCTGGGGATGTGTCCC  
GGGAAGATGTGTCCATCTTGTTCATCCTCTGATGACTTGGGGCAGGCCTCTGTAGTGTCCG  
CTCCAGAGAAGCAG

>3147 len=194 tot-seq=3

CATCCAGAGACATATAGCAAATATTATTAAATCTACATGGAGAGATAGAGTCCAATAAAA  
TGATAGTTGAGAACTTCAATATCCTACTCTCAGCATTGGACAGTTCATCTAGACATAAAA  
TCAACAAAGAAACATTAGATTTAAGCTGCACTTTGGACCAAATGGACCTAACAGATATTT  
TCAGAATATTTTCAT

>3148 len=195 tot-seq=3

TGGTGGGTAAGTGTGTTGCTGGTGTATCCTGCTGGGTTCCCTCTACAGCCCAAATATTG  
CTTGAAGTGGGTCAGCTGGAAAACAGTGTTTCAGAGCCAATTCTTAGAGTCTGGCAGAGAT  
TCACAGTAAAGTCAAGCACACCCTCAACACCCTGTTTTTCTGTCCACCCTCTTCAGGT  
GTTCCCAACACCAGC

>3149 len=195 tot-seq=3

CCTACGGGAGGCAGCAAGAAAGGTTCCCTATACGCCCTGTCCGTCCACCGAGGAGATA  
TGAAGGCGGGTGTACAACCCGTACCTCTCCGGCTGCTGAACACAAACCAATGTGAATTG  
CTGCTCCAGTTGTGATAGCTTCCGTATCGTCACTGTTACCTCCTCCAGGTTACGATAG  
GCTCCGGTCTTCAAG

>3150 len=196 tot-seq=3

AAGTGTGATATTAAGATATAATAAGGGAGGAAGAAGTAGGGAATATTAATAAATGGACGC  
AAGTCTGATGGAGCAACGCCGCTGAGTGAAGAAGGGTTTAGGATAGTAAAGATATGTTG  
TGGGGGAAGAAGGAAAGGGGGAGGAAAGGAAATTTGTTTGACGGTAATCAATTAGAAAGT  
CACGGCTAACTACATG

>3151 len=196 tot-seq=3

ATGGCTAAGTTACGGATGGCTATGACTTCCATCCTGCTGTCACTCTCCGCCTTACTGGTC  
CCCTCTCTTTGGCCCTCCTGATTGCGTGCTCTGACAACACAAGCTGCCGTGTTGTGTGA

TGCTCTACGGGGCAGCCTCCATGGCAAGGAACCCAGGGAGGCTTCGGTCCAGCGGCCTGC  
AAGGAACTGAAACCCA

>3152 len=196 tot-seq=3

GGGTCTTGAGGCTGAGTCAGGCTGATGATCTTGATGATGACTCCAAATCAGGATCAGGGT  
CATGATCTTTCTAGGGTTAAGGTCAGTGTCCAAGCTAAGGGGGGAAGACAGTACCAACCA  
AAGCGGCTGACATTCAGGAAAAGGCTCCAGGCTCAAAAAGAGCTCAAGAACAGGTTCTCA  
AAAGGTAGCCCTTGGA

>3153 len=197 tot-seq=3

TAGGGAATCTTCCACAGTGGACGCAAGTCTGATGGAGCAACGCCGCGTGAGTGAAGAAGG  
TTTTCGGATCGTAAAGCTCTGTTGTTGGTGAAGAAGGTTTTCGGATCGTAAAGCTCTGTT  
GTTGGTGAAGAAGGATAGAGGTAGTAACTGGCCTTTATTTGACGGTAATCAACCAGAAAG  
TCACGGCTAACTACGTG

>3154 len=198 tot-seq=3

CCCCCTATGAGATGCTTCCCTGAAGTTTCTCATCTAATTCTTACAATAACCTTTACGAGG  
TAGATGCTGTGTGACCTTGTCCCATATTAAGGGGAACCTGAGCTTGCAGAAGTCAGTGGA  
CTCTCCCAGGGGCCAACTAGTATGAAGCGGAGCCAGGTGTGAAGGACTCACCTACACAT  
GCTGTCTGCACAACTGTG

>3155 len=199 tot-seq=3

TCAGAGGTGAAAGCGCTTAGCTCAACTGAGCAACTGCCTTTGAAACTGTCAGTCTTGAAT  
GATTGTGAAGTAGTTGGAATGTGTAGTGTAGCGGTGAAATGCTTAGATATTACACAGAAC  
ACCGATAGCGAAGGCATATTACTAACAATTTATTGACGCTGATGGACGAAAGCGTGGGGA  
GCGAACAGGATTAGAAACC

>3156 len=200 tot-seq=3

TGGGGAATATTGCACAATGGGGGAAACCCTGATGCAGCGACGCCGCGTGGAGGAAGAAGG  
TCTTCGGATTGTAACTCCTGTTGTTGGGGAAGATAATGACGGTACCCAACAAGGAAGTG  
ACGGCTAACTACGTGCCAGCAGCCGCGGTATAGAAAGATCGGAAGAGCGTCGTGTAGGGA  
AAGAGTGGGCCAATGTGTAG

>3157 len=200 tot-seq=3

CAGCTAGTGGGTGGCCCATCTTTGCAACGAAAACCTGGCATAGCACTGGCCTTTTGAGGC

GTGTTCCCTCTAAGGCAGTGACCTCCAAGGGCGGGGTGAGGACACTTACACACCAGCAGG  
AGCCAAGCGAAATGCTTGCTAAGGGAGAGAATGTGCCCATGGCTTCTCCCCTTCCACCAG  
CACATGTGGCCAAGAATCTG

>3158 len=200 tot-seq=3

GTTGACTGGGAAGGGCAAATGGAGCAGCTCTGCCAAGGCACTCATTTCTGTGGAGGTAG  
TGTGTAGCTTCAGTTCAGTCCCTAGAGGACATGGTACAGTGGGAATAAGAGGGGTAAATG  
GAATAGCTGCATAGCAACTTGGCTCTCAAGGTAAGATGTAGCGGCAGATCAGGGATGGCA  
GGGCACCAGGCAGGAGTAGT

>3159 len=200 tot-seq=3

CCCTTAGTTCATAATAAATGCTCAATTCAGTTTTTCATAAATGGATGAAAAAGAGGATGGA  
TGGAAGAAAGGAAGGATGGATAAAAAAGAAGGAAGGAAGGAAGGAAGGAGGCAAGGAAGG  
AAGCAAGGAAGGAGTGACAGTGATGGACCACATTGCTTCTGACTTTCTGATTTCTAAGAA  
GGAAGAAAAACAAGGTAATT

>3160 len=201 tot-seq=3

GGGAGAGAAGGAGGGGAGGGAGGAGAGAGGAAGGACCTGATGTAGGCTTTGAGGTTTCA  
AAAACCCTAGTGACCTCTTCCAAAAAGGCCTCATCTATTTCCACAAGGCCCCATGCTGTG  
AAACAGTGGACCTTGCCAGGAACTTGTAAGGTAGAGTGTGTCTGAGTCCCAATCCCC  
AGGCATCCCCAATGACTATGC

>3161 len=202 tot-seq=3

ACCAGCTAGCACGGTAAGTACTGGAAAAGGGGTTTTTCTCCGCCCTGCCCTGATCCTGA  
TCCCCAGGAAATAGTAGTAATTCGGGACCAAATTGCCATTCTCACCTTTGCCACGAACT  
TGGACTTTCTCTAGGGACCAGTCTAACAAGCAAGGTGACGAAACGAACAGTGTTGGAGAG  
GAAGGGACCGCTACACAAGACA

>3162 len=202 tot-seq=3

TGAGGGATATTGCACAATGGGGGAAACCCTGATGCAGCGACGCCGCGTGGGTGATGAAGG  
CCTTCGGGTCGTA AACCTTTTCCAGGTGACGAGGAAGGACGGTAGCCTGGGAAGAAGT  
CTCGGCTAACTACGTGCCAGCAGCCGAGTAATCTGTAGATCGGAAGAGCGTCGTGTAGG  
GAAGAGTGTGCCAATGTGTAGA

>3163 len=202 tot-seq=3

TGGAGTTCAGACGGGGGCGAGGCCGAGAGCCGAAGGGAGGCAGCAGGGAGGAAGAGGGGG  
CAAGGGGCGAGAGCCGGAACCAGCCAAGGCGCGGGAAGGAAGACGGCCCGCAAGGGTTGT  
AAACTTCTTTTGTATGGGATTAAGTCACCTACGTGTAGGTGTTTGCAGTTACCATACGA  
ATAAGCATCGGCTAACTCCGTG

>3164 len=203 tot-seq=3

TCCCAGAGCACTGCTGAGCCCATGAGCACTTTCTAGGCAGAAAGCTGCATGGAACCTGGG  
GACACCAGCTGCTTAAATCTCCAAATGGAGTGACCATTGCAGTCATCTCCATCTGCCC  
TCTGCTGCTCTCCTCCACTCCGGTCGGCTCTCTAGCATGCAGAAGACAGTGGGCGTCATG  
CCGGAGGCTTCCCCTTTCTTGTT

>3165 len=203 tot-seq=3

GTCCCACAGCTGTGTCTCATGTCTTGGGTGTGAGTATGGGAAGCAAGGCTGCTCCAGGGG  
CTGTGGGCCCCACTCTCCTCCCCTTCTGCCCGGATGGTGGGGATGGGGGTGGGGACAGAC  
CCAGCAGAGAGGGCCCCCTCCCGATGGGACATGAAGCCAGATGGCAGTCAGGCTCTGTGGG  
CAGCTGCATGTGCCCCCGACGTC

>3166 len=203 tot-seq=3

GAAACCAAGGCACACACTGGTAAAGTGATGCACTCAGGGTAACTTCATAGTTTCTCACGT  
GTTAGAAATACTCTGTCCCTTCACTGCCCTGGGTGCCAGGCTTATAAATTTAGCTCCATT  
CTACGGGAGCTGGAACCTCAGATTGAATGTGTCTATCAATCATCTTTGGGATTCTGAGCCT  
CTGGTAGAACTCTAGAGCCTCTC

>3167 len=203 tot-seq=3

CCCGAGCCTCAAGGCAAGTCCAGGACTCAGACCGGGGAGGCCCGGGCCAGCAGCTCCCAG  
TGTGACCTGACAAAAACACGTAGGGGCAGGGACGGTCCCCACCCCAGGGACACAACCCC  
TGGTCTTGGACCAGTAGAGGACACGGAGGGTTCAGACCCCTCCTCAGACCCTCCCCACAT  
CTGAAACTGCCTCCCCCAACCA

>3168 len=204 tot-seq=3

TGGGAATATTGCGCAATGGGGGAAACCCTGACGCAGCAACGCCGCTGAGTGATGAAGG  
CCTTCGGGTCGTAAAGCTCTGTCCGCAGGAACGAGGGTGTGTTGTCTCTAATAAAGGCAAG  
CATTGACGGTACCTGCAAAGGAAGCACCGGCTAACTCTGTGCCAGCAGCCGCGGTCCAGA  
TCGGAAGAGCGTCGTGTTGGGGAA



>3169 len=204 tot-seq=3

GTAGTGGGTCCTCAATCCAGGTCCTGGAGATGGGCCACCAGGTGGAGGTAGGGAATGAAGT  
AGCCAGTGTGATCAGGGTGAGGGCAACAGTGTAAACGGAGGAAGGGGCCATGATGGAGGA  
GAGAGGTGAGTTGGGCCCTGGGACCACCCACAGCAGGGTCCTCAGCCAGGGAGGGTGGGC  
GGAGGAGAGCACCACAGGCCACTA

>3170 len=204 tot-seq=3

GGGTTGTTGAAGCCACTGTCTCTCAAATGTGCTGGTTAGGGCGCAATAGAAAACCACT  
TCCTCTGCTGTGGGAGGAGAAGAACTCATCCCGAAGCCAGCTGCAGGCTGAAGAGCGGG  
TTCAGGTCACCCCTGTACAGCAGGACAGGGCCACACACACATGTCGCGGCCCGGGTCCCT  
CACTGCGTTGGGAGTCCGGTGTCC

>3171 len=205 tot-seq=3

CAGAAATGGGGGGGTGTCAGTTGTAGGATTATCAGAAAGCCCTCAGTGGTGGGAGGCAGG  
CGTAGATGCCAAAGGTAATATAGATAAACCTGTAACAATACCATGTGCACCTTAAAAGCC  
TTAGTCTAGGGATCGTTTACGGAGCCTCCCTGGAGACCAGACCTAGGGTCAATGGTTCAA  
AATAATTACATTCTTTTCGTTTCTG

>3172 len=205 tot-seq=3

CTTGCAATGCGGTTTGTGTTTTCCACATGTGGGTATGTGAGGAAGCCAGATATAGGATAGG  
CTCAAGCCCCTTCTTCTCCGAGGTTCTCACGTCTCCAGCTAAACTCCACCTCCTAAAA  
GTTTCAAAGCCTTCCCAAACAGCATCACCAGATGGAGACCATGTGTTCAAACACATCCT  
CCTGTGGAGCATGCCTCCCGTCCCA

>3173 len=205 tot-seq=3

CAGGTAGATGTCACCCATGACAACACGCACAATGGGATGAAGGCTGTCTCAAAGCGGTG  
TACAACTGAGAGGCCAATAAGTGGCACATAGAAGGCGAGTACCACACCAATGTGTGACAC  
ACAGGTTCAAAGGCCTTGGCCCGCTCTGACTTGGAAGGCAGTTGCAGAACCGTTCGTAT  
TATCAGAAAATAGGACAAGGAGATG

>3174 len=205 tot-seq=3

AGAGAGCAATGCCCCACTCCAGAGCCTCCCCTCCCGTCTGGGGATGTGGGTCAAGGGCT  
TCCCAGGAATGCAGCTGCCCTCCAGGGCTGGGGGCTGGCCAGCGCCTCCTGTGTTGGGC  
AGCAGCTCTCTGAAGCCAGGGCCCCACGCCACTTCCAGGTGTGGACAACCCCGCTGATC

AATGTCTCTCTGTGTTCTGCCTTCC

>3175 len=206 tot-seq=3

TAGGGAATTTTCGTCAATGGGGGAAACCCTGAACGAGCAATGCCGCGTGAGTGAAGAAGG  
CCTTCGGGTCGTAAAGCTCTGTTGTAAGAGAAAAACGGTAATGATAGGAAATGATCATT  
AGTGATGGTATCTTACGAGGAAGCCACGGCTAACTACGTGCCAGCAGCCGGGTAATATGA  
AGATCGGAAGAGCGTCGTGTAGGGAA

>3176 len=206 tot-seq=3

CTTCCAGACACCGCAGAGAAAGGCTACCATGGGCCTTAATGAGGACTGTACCACACAGA  
ACTTCTCCACAAGGGAAGGGGAGGAGAGTGGTGGGGTGCCTTTTTACCCGGGGGTCTCG  
TGC ACTCTGGCTATGTAGATCATCCTGCCACAGATCATTGACTTCATAGGGATTCCAA  
GTTCCACCAGCGGCCGCGGTAATAAC

>3177 len=207 tot-seq=3

AAAAGAGTGCTTGGGAATCAGAATCTGCAGGACTTGGTGGATGAGATGAGGGCAGAGGAG  
TCAGGGATGATCCTGGTTCTCTGACTTGACCTGCTGGGTTGTTGGAGGAATGCTTGCCTG  
AGTCAGGGAGGGGTCCCACAGGAGGAGCATGCTGGGTTATCAAGCATCCAGAGACTTCCC  
TGACGGCTCCCCCTTCCATTCTCCAG

>3178 len=208 tot-seq=3

AGACAAAAGTGGGAAAACCAAGAAAAGATAAACGGCAGAGATGACAGAGATAAGCTAAAA  
AGTGGAAGGGGAAAACCCAGGCAGAAACAGCAGCTACAAAGGCCAAGCCAGGGAGTGACT  
CAGACAGAGACAGGTAGGCAGAGAAGAAGGCAAAGTAGACCCTGAGGCAGTCGCCCCACTC  
ATTCAAGCCAATCCATGCCCCAGCCCA

>3179 len=208 tot-seq=3

TGGGGAATATTGCGCAATGGGCGCAAGCCTGATGCAGCCATGCCGCGTGATGAAGAAGG  
CCTTCGGGTTGTAAAGTACTTTCAGCGGGGAGGAAGGCGATAAGGTTAATAACCTTGTCG  
ATTGACGTTACCCGAGAAGAAGCACCGGCTAACTCCGTGCCAGCACCGCGGTAATGAGC  
AGATCGGAAGAGCGTCGTGTGGGGAATA

>3180 len=208 tot-seq=3

TGACCACATTTTCCGTGCCATTGACATCCAGAACGGAAAAGTAGTGTGGACCTATAACAA  
CGTAAAAGGATATGTAGAAACAAAGCCCTTGGTTACAAACAATCAAGTTATCTTCGGTGC

ATGGGACAACACACTTTACTCGCTGAATCAAAGAACGGTCATGAGAATTGGCGTTGGAC  
GGGCAATCTCACTCGAATGCACTTCTCA

>3181 len=208 tot-seq=3

GCTCCGCCAGTCCCTGCGGTGTTCCAGCAGCATCTTCAGTGTGTAAGCGTTTCTACCTT  
CATCTTTCTCTGAGGGGGACTCGGGTGATGCATCATTGTCCCTGGTTACAGGTGACAAAA  
TGGGCTCAACTGTGGGAGGGGCCTCTGTTTGTAGGACTCCCTGCACCAGGTTTTCTTCT  
TTACACACACACAGCTCTCTGATTAGTG

>3182 len=209 tot-seq=3

TGTAGTTTTGAATCTCCTCAAATCCTCATGGAGATAGATCAAACCAAACAAAAACCC  
ATAAGTAGCCTTTATCACAAAAGTAGAGGACGGTTTTCCCTATGAACCCCAAACAAGAG  
GGTGGGGCAAACCATCACCAATGGGCACCAGACTTGCCTGGTATGGCACCCACACAAGAG  
GGAGTGGTAGACAGTATGCCTTCAAAGT

>3183 len=209 tot-seq=3

ATCTTAAAGACAGATCCAATCATTCCGCTGTCTCCTCATGGGCATGGAGATGAGTCAAG  
GGAAAGAATAAACATGTTTGTGGAGAGACATCGGTCAGGAATAGGGTCTCTGGTGGTG  
CCAAGGGTGAAGCAGGGGCCACTTTGAGGATCAACTACAATAGATTACTGAGGTGAAAGC  
AGAATCTCACCAATGAGGCCAAGAAGAGC

>3184 len=209 tot-seq=3

CGGTGACTGGGAGTGCAGCTGTGAGGCTGGGACGCCCGGTTTCTGAGCCCCGGGAGAG  
CAGCGCGGGACTCCGTGGCGAAGGGACCGAGAAGTTTCGGGACCTTTACAGAAACAGCCG  
CACACCTTCGAGCAGCCTATATATATTGTATTTGATTTAGCCCAAGCCAGGTCTCCCT  
GAAGTCCCATCTCCTGGAACCTCCGCCCCG

>3185 len=210 tot-seq=3

CGGGCTTTTCTTTCTTTTTTTTTCTTTTGTTTTGTTTTGTTTTGGTATTTTTGTTGTT  
GTTTTGTTTTGTTTTGTTTTGAGACAGGGTTTCTCTGTGTAGCACTGCCTGTCCTGAAAC  
TCACTTTGTAGACCAGGCTGGCCTTGAAGTCAAATAATCTGCCTGCCTCTGCCTCCCAAGT  
GCTGGGATTAAAGGTGTGCACCATCACTGC

>3186 len=210 tot-seq=3

TGGGGAATATTGCGCAATGGGGGAAACCCTGACCGAGCAACGCCGCGTGAGTGAAGAAGG

TTTTCGGATCGTAAAGCTCTGTTGTAAGAGAAGAACGTGTGTGAGAGTGGAAAGTTCACA  
CAGTGACGGTAACTTACCAGAAAGGGACGGCTAACTACGTGCCAGCAGCCGGTAATGCA  
TAGATCGGAAGAGCGTCGTGTTGGGGAATA

>3187 len=210 tot-seq=3

TAGGGAATTTTTCACAATGGGCGAAAGCCTTATGAAGCAATGCCGCGTGAACGATGAAGG  
TCTTATAGATTGTAAGTTCTTTTATATGGGACGAAACGCTAAGATAGGAAATGATTTTA  
GTTTGACGGTAATCAATTAGAAAGTCACGGCTAACTACGTGCCAGCAGCCGCGGTATACA  
AGATCGGAAGAGCGTCGTGTAGGGAAAGAG

>3188 len=210 tot-seq=3

GGGGTGGGTGGGGGAATGGCATGACCCAAGGCCTGGCACGAAGTTGGCATGGAGCACCA  
CATGGTGTGCTGAAGAGGGCCGTGGGGCTGCAGCATGAAGGCCTGGCATGCTAGATGA  
TGGACTTGACTTTCTATAGGTGATGGGGAGCCCTGGAAGACTTCAGAGCAGGGGAGGGAC  
AAGGAGCAAGGTGGCCGTGGGAAGATGGCT

>3189 len=210 tot-seq=3

CAGCAGGGGCCTGGCCTCCCTCAGCCCTGGAACAGCAGGTCCCTGCTAAACCAGAACAGG  
GGCCTGTGAGGTCTCATTGTGAGTGTCCAGCCTTAGTGAGCTCCAGTGGGTCTATATGT  
TGGGGTTCTGGGGAGGGGTAGTGGCATGCAAGGACAGCCTGGGTGTGATATCCTTGGCA  
CCAGTGATAAGCCACAGGGCTTCCTGTCAC

>3190 len=210 tot-seq=3

TGCACTAATTATTGTCAAGGAAAATTTCTCCTTATGCCCTGAGTTGTGGGAATGTGGAAT  
TACCATGAGTAACTGGATACCCTACAACCTTGCATTAGTAAAGCCAACACCACTATTGA  
AAAGGATTTCTACAAAGACAGATACATCAGAAAATGATAGCTCATTTGGTGGAGCAGAGA  
AACAAGGATTGCATGTTTCTGCAAATAATG

>3191 len=211 tot-seq=3

GAATGAGTACTTATGGCCATGCTCCACTGCAGCTGTCCCAGGCCAAGTCCCATGGCCTC  
CATGAAGGCTGGGGTTCTGTCTCTGCCAACTCTCTAGGCAGTTTCCCCTGTCGGCTGAAA  
TTCCATGGAGGTCATAGGGTCTCTCTCCTCTACCTAGGTTACCAGAGGTCTGTGGCAGA  
GTGAACCATATCTATTCCACTCACCCCTTCC

>3192 len=212 tot-seq=3

AGGATGGCAGGATGTGTCAGGCATGGTAGAGAGGGTCAGAGGCCCTCAAGTAATGGGGAC  
AGCTGGAGTCTCCTCTGGAAATCAGCCTGCACTTTGACCTGGGGAGAAGTTCTCAGACAT  
TATTTCCCAAGGGGACAAAGGGCCTGCTGAGACGCAGTCCCTCTGATACTGCTTTATGGT  
GACTTGGCCAGGGGTTGGCCAGCATAGCACAG

>3193 len=213 tot-seq=3

AGGCCAGGTGTGACAGGCCAGAACGGTTTCTACCAATGCCACATTTACAGTTTTATATCT  
TCACGGGTATGCTTTCAGGAGAGGGCACAGGGCATGTCTGGAGACCAGTGGGACACAGCTG  
GCTTGGAAACACAGATGACTCTGAAGCTGGAATCCTTAGGAATCTCTAGGCAACTCCTTCC  
CTGAGGAAGGAAGCACTGGGTGTGGTACCTCTC

>3194 len=213 tot-seq=3

AGTGGTGCCACCAGCTGTTGATCCAAATCTTCTCAATCCCAAGCCCACATTTATGTAGAT  
GCACTTGCCCATGTACACATGAACATTGGGCAATGCGATCCTAGATATGCACGAGTTTC  
CCACCTTACTTAGAGAAAAGGAAAGGAACATTTGCTGGGAGCCTGCAGTGTCCAATACTG  
TGGTTTGCATGTCCGTATTCTCAGTGAATTCTC

>3195 len=213 tot-seq=3

AGATGGTGACTGGAGTTCAGACGTTGCCTCCGATCTCCTACGGGGCAGCAGTGGGGAAT  
CTTCCGCAATGGGCGAAAGCCTGACGGAGCAACGCCGCGTGAGTGAAGAAGGTCTTCGGA  
TCGTAAAGCTCTGTTGTCGGGGACGAATGTTGAGGCCTAGAACATAGGTTTCAAATGACA  
GTACCTGACGAGGAAGCCACGGCTAACTACGTG

>3196 len=213 tot-seq=3

GGGGACATGTGAAGACATGGAGAAGGGGCTGGTGCTGGACCCACAGGGGCTTCTGGAAAC  
TAGGGAGTGAGATGCTTCCGGGCTGGCCTGGGCTTCTCCTGTGCAGCAGAGCTCAGCAGA  
GCTGCAGGGGAGGCACCTGCAGCCCAGAGCTGGGTACAACCCCGTGGGCCTGCCAGAAT  
GGGACATCTGAGCAAGGAGAGAACCAGCAAGAA

>3197 len=214 tot-seq=3

ACTAGTTGGGTCTGGGTGGGTGATAGCCACCAGTAATGGGGACTTATTATTAAGCTGCC  
AGAGTTATCACTCATCACCCAGTCACAGAGCAGCTGGAGACGAGGCCATTCTTCTTTT  
TCCTGGAGTTGCAGCCTGAGGGCTCTGAGTTACTGAGTAAAAGTTGGCGTTCCAAGCACT  
GGTTTCTTGTTCTCACCATGTTGAGTGAGAGTG

>3198 len=214 tot-seq=3

TGAGGAATATTGGTCAATGGGCGTGAGCCTGAACCAGCCAAGTAGCGTGCAGGAAGACGG  
CCCTATGGGTTGTAAACTGCTTTTATGCGGGGATAAAGGAGTCCACGTGTGGATTTTGC  
AGATACCGCATGAATAAGGACCGGCTAATTCGTGCCAGCAGCGCGTAATCTTAAGATC  
GGAAGAGCGGTCGTGTAGGGAAAGAGTGTGCTGA

>3199 len=214 tot-seq=3

TCTAATGGTAATATTCCCAGTTAATCACACCCCAAAGGCACAGTCCCAGCTGGGATGAT  
ACCTCCCGTGCATGGAACATACAAGACGCTCTGAGTGACCAATAACAAGGGAAGTGGAAA  
AAGAACAAGGGTAGTACAGGTTGAAGATTGGCCTTGTCTTTCTCTGGACTGCAAAACGT  
TCCATGGATGGATTCTAGAACTTCGCGAACCTGT

>3200 len=214 tot-seq=3

GCATCAGGGTCCCAGGTGCACCGGAGGGGAGCAGACAGATGCAAGCCAGGCTGCTCTACT  
TGGCAGGGAGAAGGAGGAGGAGGAGCAGGGGCCCTCAGTTGCTGCAGGGCCTCCCTAGG  
AACTTACCGCCTACCTCTACACCGTAGTTCCTGCTTCTCAGAGTCCCTTTGTTAGAACAC  
CTGTGCCTTCTCCGCACCCAACCTCCATCTCTTC

>3201 len=215 tot-seq=3

TGAGGGATATTGGACAATGGGCGGAAGCCTGATCCAGCCATGCCGCGTGAAGGACTAAGG  
CCCTATGGGTCGTAAACTTCTTTTGACGCAGAGCAATAAGGACCACGCGTGGTCCGATGA  
GAGTATGCGTCGAATAAGCATCGGCTAACTCCGTGCCAGCAGCCGCGTAATCAAAGATC  
GGAAGAGCGTCGTGTAGGGGAAGAGTGTGCCAATG

>3202 len=215 tot-seq=3

AGAATGTAGCAGTGGAGATTCAAGCATTAGCCAGTGGAGGGACTAGATGAGTTAAGGGC  
CTTTTACCCATTCTCTTGAGAAATACTGTGAGAACCCAGAGTAGGTGCCAAACTCCCG  
CAAGGAACAGGCACTAGGACAGAGGCCACGGAGACAGGGCCACTCAAGCACACCCACAGC  
AAAGAGCTGGCTCTGCTTGACAAGTGGCAGGTCAG

>3203 len=216 tot-seq=3

AGCTGGACCTTTAGGATGACCTTGAGAAGAGCCACAGGTTCTCAGAACTAACAATTCTAT  
TATTCTTCATTTCTCTCTCGTGATGACAGTTTCTGCTTTGTAAGCTCAGAGTGTTCTACT  
AAGAATGTGACAGAAAACCCATTTGGACCAGCTGTGGATCATCTGTAGATGTGTCTCCCA

CTCAGGCCAACACTGTGAGCTAATGAGCTGACCCTC

>3204 len=217 tot-seq=3

CGAATCGAGCTTGTGCGGGAATCCGGCACACCCTTTCGAAGAATTCGAGAGTGGAACGG  
CACGTCAGTTCCTGGAACAAACATGAATGGAGGCTTGCCGCCATACTCCTTAGCGCGCTT  
AGAAGCGTCTGCCGCCAATGCCTTCAAGCCTTTAATAGTTCAGCAATTGCGTACTGCTG  
ACCTGCCAAGTTGTAGTTTACAATTTGCAAGAATTCG

>3205 len=217 tot-seq=3

TCAAGCAGAAGACGGCATAACGAGATAGTCATGTGACTGGAGTTCAGACGTGTGCTCTTCA  
GATATAATAAGGGAGGAAGAAGTGGGGAATATTGAAAAATGGGAGAAAGAATGATGAAGA  
GAAGAAGAGTGAGAGAAGAAGTATTTAGGTATGTAAAGCTCTATCAGAAGGGAAGAAAAT  
GACGGTACCTTACTAAGAAGCTCCGGCTAAATACGTG

>3206 len=217 tot-seq=3

GAAACCAGAGCAAATTTTGATGCATTGCTTAAAACAGATGAAGAGGACGAGCAAAGGGGA  
GACATGTCTCTTAATTCTATGTGAAAACAAGGATATTTATGTATAGACTTCGCTCTTCAG  
GCATTGTAGAACTGACAGCTAATTATGCAGCCTGGATAGCATCTTGCCGAAGATGAACAA  
CTCTGGTGGACCAAGTGAAGGCCAAACTAGTGATGTC

>3207 len=218 tot-seq=3

ACAGTGGAAGACTAATGGGATTAATACTTGGGATTCATTAGCCAAGGATTCTGGAACTTT  
TCCAGTCTCTCCACCAAATGGCCCAAAGTCCCCCTTAATAGCATTAAAGTGAAATTACA  
AATCAGAGACGGTGGCTGATCAATCTCCTTGGGGCTTCTCTACAGCTTTTGTGCAGTAGG  
GGTGGTGACAGTCCTTCAGTGGGGCGACTGGTCCTCTG

>3208 len=218 tot-seq=3

TCCGTAGGCATTGTTGATGGCACCGCTACCATGTTTGAACGCATGGGCTACGGAATTTAT  
GAACTTGTCACCTTCTGGGCTCCTACTTACAAATGCACGTACAAGCCCCCTTATCAGGGG  
CGCTGCGGCATGAGCGGCCTCAAGGAATAACAATCCCAATGGCGGCCTGAGCGAATTCCT  
GCGGAACTCAGCTTCCAGAGTTACTACAAGTATTCACG

>3209 len=219 tot-seq=3

GCGTCTAGGTGGTTATATAAGTCTGATGTGAAAATGCAGGGCTCAACTCTGTATTGCGTT  
GGAAACTGTATAACTAGAGTACTGGAGAGGTAAGCGGAACTACAAGTGTAGAGGTGAAAT

TCGTAGATATTTGTAGGAATGCCGATGGGGAAGCCAGCTTACTGGACAGATACTGACGCT  
GAAGCGCGAAAGCGTGGGAAGCAAACAGGATTAGATACC

>3210 len=220 tot-seq=3

GATTACAAGGTGACTGGAGTTCAGACGTGTGATCTTAAGATATAATAAGGGAGGAAGAAG  
TAGGGAATATTAATAAATGGAAGAAAGTATGATGGAGAAAAGAAGAGTGAGTGAAGAAGG  
TTTTAGGATAGTAAAGCTCTGTTGTTGGTGAAGAAGGATAGAGGTAGTAACTGGCCTTTA  
TTTGACGGTAATCAACCAGAAAGTCACGGCTAACTACGTG

>3211 len=220 tot-seq=3

GGCTTCCATCCTGCCCGCACCAGACACCGCTGTTGAGTGCGTGGAAGCGTCACGCCGCC  
CACTACGCCGCTCCTCTCCGCCAGGTCTCTTCTGGGGACTTGCCCAAGGCTCTGGGCAGA  
CAGAGCTGACACGCCGCCATCTAGCCGCCGGAAGCAGACTCTTGACCTGTGAAGCTGGCG  
GCGGCACTGCTCTGAGGCCAGTCACACGAGCGACAGGCAC

>3212 len=221 tot-seq=3

CTCTAACATCTCACATTCATGCCAGGCTTTTGGCCCAAGCCAGGCCGGTCGAGCCACATC  
TGAGACTGGCTTGCTGTGGACTGTGCTGGGAGAGGCTGCTAGTCCAGGCCAGAGTGCCAG  
TCTTTCCAGCTCTGATGCTTTCCCTGTTGCTTGACGACAGGCCAAAGCGCCCAATGCACC  
CACCAAGGGTACTTGGGTAAGGCCAGTGCAGTCACGGTGC

>3213 len=222 tot-seq=3

ATGGGACAGGAGGCAGCGGAGGGGGAGTTGAGAGCGGGGAGTCAAGAGGTGGGAGCTGCA  
GAATTTGGCATCTCTCCCATGACTGTGAAGTGTTAGAGACTGGCTTGGGCTAACGTGG  
GAGCTACTAGGACCCACCATCTCTTGCTGCATGTAGATGCTAATTGAGAGTGGGAAGGC  
AGGCAATTGAAACACTTATTTTTATCATATAAGAAAAGAAA

>3214 len=222 tot-seq=3

AATCGCTTGAACCCAAGAGGCAGAGGTTGCAGTGAGCCAAGATCGTGCCACTGCACTCTA  
GCCTGGGTGACAGAGCCAGACTCCGTCTAAAAAAAAAAAAAAAAAGGGCAGAGAGAAAGATAC  
ACACAGACACAGATGGAGAGGAGGGGGCTGAGAATTGTGTGGCCAGTATGTGGGCAGAAA  
GAGAACTGAGGCTGGGGCTTAGAGGAAATCACAGGGGGAGG

>3215 len=223 tot-seq=3

GCTGAGATTGTCGCTCAGTGGTGACGCACTTTCCTGACATAAGCAATACTTTGTGTTGAA



GCCCCAAACCTCAAGGGGAAATAGACACTGGTGAGTGAGCATGCTGATGAGATGCCACGA  
GAGAAACAGCTTCAGCATACTGTCTTCTGGTTTCATCCAGTGCATTCAGGTCCTCACAGA  
AGACCTCTGTGAGCAACTCTCGTTCTACCCAAAATCAGCAGCA

>3216 len=223 tot-seq=3

TAGGGAATTTTTACAATGGGCGCAAGCCTTATGAAGCAATGCCGCGTGAACGATGAAGG  
TCTTATAGATTGTAAGTTCTTTTATATGGGAAGAAACGCTAAAATAGGAAATGATTTTA  
GTTTGACTGTACCATTTGAATAAGTATCGGCTAACTATGTGCCAGCAGCCGCCGGTAATG  
TATAGATCGGAAGAGCGTCGGTAGGGAAAGAGTGTGCCAATGT

>3217 len=223 tot-seq=3

TTTGCATGAGCTGGTGGCCCTTCAACGGATCAGGAGGCAGGCACAGGCCTACCGTTCGGT  
GCCCCCTTGTCCAAAGGTGCTGCGCCGCATGATGCGTGGTGGCCGCCAGTGGCGGTCCA  
GATAGGGAAGGTTGCTGCTCTGGTAGGAGGTGCCGCGCACAATGCAGGGGATGCGGTGCG  
TCTTGAACCAGAGCTGGGTTTGCTCCGAGGAACGGTGAAGTAT

>3218 len=224 tot-seq=3

TTTGACCCCCACACTGTGTTTTTCCCACTGACATCAAATCCTGAGGTTTTAAAATTAATC  
CCATACAAAGACAGTTCTTCATTGTGGTGCCTGTTTGAAATTAGACCAGCAATAAGGACC  
TTTTTAAAATGTCTCGTTGTTAAGATAGGCCCTGTTGGAGCTGAACAGCTGCCTGCCAG  
GGAGGGGGTGGGAACAGGGAGGGACAGTGC GCGGGTGAGACGCC

>3219 len=224 tot-seq=3

CCTCACCGTGTGACCCGGGCAGTGAGTTCACCTCTCTGTGCCTGTTTCCTCTCTATAAA  
ATTGGGTTTTTAGCTGAATTTTCTTACAAGGTGTTAAGAGGATTAAGTGGGCCAATTCT  
TAGTTGCAACTCAGCCCGGAGTGAATGTTTCTGTCTTGTCTCCTCTGTGAGTAGAAAAGG  
GTGAGAAGGAGGCCCTGGTCTGCTGGATAGGGTAAGGGTTAAGG

>3220 len=224 tot-seq=3

CAGGGTGGAGATTCTAGGAAAGAGGAAAGGCCTTCCAGGAATTTGGGCGGGAAGGGCTGA  
CGAAAACGCAGGGCCCAAGGAAGGGGAGGCCACTCACTCATCCAAGGTCACGCGGCTGAG  
CCAGGACCCCCCAGGGGCTCTATACACGTGGGCACTGGCAGAGGAGCACTGCCATGGAG  
GACCCCGCTCCCCACCTGCCACCACCATCCTCGGTGCAGGTCAG

>3221 len=225 tot-seq=3

CAGAGAGCCCCAGAGACAAGGGGCCACTGAGGCTAAAGCAAGCACGACTGCTCACACAGG  
AGTGCAGCGGCACAAAGGAGAGCTCTCGCCGGTCAACACTGCAGAAGCAGTGCTCGGCCGT  
GCGCTCCCTGGTGGGCATTGGTCGGTCAGCGCTGTCCCCAGTGCTGTAGGGTGGCTACCG  
ACTGGGATTCTAGTTTTCTACTGTGCTTGAGGTCATTCCCACA

>3222 len=227 tot-seq=3

AGGCCCGCCTGGGCCAGGGCGTGCACCAGACCAGAATCCTGCGGATTTAGTATTGTGAGG  
GTAGAAGACCAGCAAGCAGCATGCCCTCGTGGTTACTGATCTTATGAAGAACACTTGTCT  
TTCATATTTGGGACTGTGTTAAGGTTTTCTGGAATATTTTTGGTCGTAGTAACGATTCTG  
CTTAGGAGCTTTCTTCTCTGGTGTGCACAGACCTGAGTGATTTGA

>3223 len=228 tot-seq=3

GTTGTGTGCAGAGAGACTTGGGAAGGGAAAATGTTGATGGAGAGGTCCACATGAAGAGGC  
TGGGGCTTCATCCTGGGGTATCCCTTCTCTTGAGATTGACAGTAGGGTTGAGGAGGATT  
GAAGAGTTTAATCAGGGGGCTGAATGTGGTTGGATCTCTGTCAGATATCCAGAGGCTGGA  
GGCAGGGAGGCCGGGGAGGATGCCACCTTATAATCCCCGAGAAAGATG

>3224 len=228 tot-seq=3

CAGGCCTTTGCCTGACAGACAAACAAGGCACAAGGTTACCATGCTCTTCTCAGTGGGCC  
AAACTGGACACTTCTGCACTCTCCTTCCAACAGAGCTCCTGCCACCTGTCCTCACCTCA  
TCTATGGGGATCAGAGTCTGCATGGCCATGATCAGCTTGGGCACCAACATCCGAGCGAGA  
GGCTGAGGGACACATCACAGAGAGCATGATGCAGCCCAATCTCACACC

>3225 len=229 tot-seq=3

CTCCATAAAGTCCTCCAGGCATCCTGAAAAATGCTGAATCCTATGATGCACACAACCTAC  
TCTCAGTCTGGTATCCCTACCTCATATTCAATCCTTCTTCCATATGACACGTTTTCAAAT  
ACTTGATAGCTATCATGCCCCCTTGTCTTCTGTCCCCTAGGCTAAGTTTCCCTTGATCC  
TTCAATCAGAAAATAAGTATGCCTGAGTGAAGCCATTTGAACAAAATTC

>3226 len=230 tot-seq=3

CGGGCAGAGGAGCAGCTATATCTTCATAGCTGAGGGGATGGGACCAGGGAGAGGTAACCTG  
AGATGCCTGAAGCTGACATTTAAAGAGGCACTCACTCTCAGGGTCAGCACCCAAATTTTG  
TTTCTCACCTACTTTTCTGGTCACATCCTAGTCTCAGCCTTGCTACTAGGTACTTTTCTC  
GTGCCAGACTTTGGGCTAAGGGCTTGTGTGCACCATCACATTCCATCCTC

>3227 len=230 tot-seq=3

GTTAGAGAACCTTACACACATATTTATGCTATGCACTGTCCCTGGATAATCTAATTTACT  
CTCTTGACTTTAGCTAACACATGTGAGAAGAAAACCTTTGAACCTACCTCATCAGCCATG  
ACTTTGCTCCCAGGCACAACTCCATGTGGCTTTTCAGTTTAAAGTCTCACCTCTGCACCT  
GAAAGTCCTAACCGCACCTGACACTCATTGTGAAAACACTACCTGCACTA

>3228 len=230 tot-seq=3

GGGCGTAAAGCGAGCGCAGGCGGTTTTGATAAGTCTGAAGTTAAAGGCTGTGGCTCAACCA  
TAGTTCGCTTTGGAACTGTTTAACTTGAGTGCAAGAGGGGAGAGTGGAATTCATGTGT  
AGCGGTGAAATGCGTAGATATATGGAGGAACACCGGTGGCGAAAGCGGCTCTCTGGCTTG  
TAACTGACGCTGAGGCTCGAAAGCGTGGGGAGCAAACAGGATTAGATACC

>3229 len=230 tot-seq=3

ATTTGTTACAGCAGCAAGAGGAAACATGCAAGAAGCAAGGCCAACTCAGAGCAAAAATTC  
AGAAGGCAAAGCTGGTCTCTGGTGTGCCACATGCCAGTACCATGACTGACAAGTTGGC  
TGTCTTAGTCTGTTTGGGCTGCACTAACAATACCATAAACTGAGTGGCTTATAATAAACA  
GAAATGTATTTCTCATAATACTAGAGGCTGGGAAGTCCAAGATCAAGGTG

>3230 len=232 tot-seq=3

TAAATGTCCAAATGGCAGCGCCTATCAAATAGAGGCACTATGACATCTCCTCAGCCC  
AAGGCCATCACAGGAGCTGTCCATGGTGGCAGCACCTTCTGCCTCAGCCTACTTCTGT  
CCTGAGGAGCTGTCCACAGTGGTGTGAGACCTTCTTCAATGCCCCAGCCTACAGCCTTGAT  
GAAGCACCCTACCGGAGTTGTTACAGAGGCAGCACCTCTCTCCAGCCTCC

>3231 len=232 tot-seq=3

TAGGGAATTTTTACAATGGGCGAAAGCCTTATGAAGCAATGCCGCGTGAACGATGAAGG  
TCTTATAGATTGTAAAGTTCTTTTATATGGGAAGAAACGCTAAGATAGGAAATGATTTTA  
GTTTACTGTACCATTTGAATAAGTATCGGCTAACTATGTGCCAGCACCGCGGTAATTGT  
TAGATCGGAGGAGCGTCGTGTAGGAAAGAGTGTGCCAATGTGTAGATCTAG

>3232 len=233 tot-seq=3

CATTGGGCGACAGAGGAGCTGAGCTGTAGTGCAGTCTCAAGGGGAAGCCCCAGTTGACC  
CCATGGTATGCGTTGGACCTGGAATGTCCCTTTAAAAGTGTCCCGAGTTAGGATGCAGGG  
GCTGAACCCCATGTCCATAAGCCCTTGGATGGAGCTGAGCCTGCAAACATCTGACCCTG

AGCACAGCTCTTTAGCAGGAGCACAGGGGAGGAGGGTGTCTGCAGCAGCACTT

>3233 len=235 tot-seq=3

TGGAGCCAAGCTGTCCACGTGCATCAACTGTCCCGTTGGAGCCAGGGTGGGCCCCACG  
GGGGTGTGTACAGGGCCGCGAGTGGGCTCCTACCTGAGAAAGATCCCCTTGAGGTTGGGC  
GTGGAGTCGAAGGCATTGGCGGGCACC GCACTAATCTTGTTGTTCTGCAGGTACAGGTAC  
TCAAGTGA CTGGGGAGCCCCTCGGGGATCTCTGTGAGCTGATTCCCGGCGATGT

>3234 len=240 tot-seq=3

AGAGGGAGGCGTGGCAGCAGGCAGTGGGCACCTGTGGGCTGGGCCTCCTGTTCCAGGCAG  
ACAGCCACCTCCCCTGGAGGCCACAACACCACAGATGAGGAAGAGAAGCACCCACAGATG  
TCTCAAGGATGTTCAAGTCCAGGACGCCCCAAGGCACCTGCACTAAGGTCTAGGCGTCC  
TTCATCTCAGCGAGGGCACAAGTGAGATACAGCACAGTAACAACATTCATGGGAAGGGAC

>3235 len=241 tot-seq=3

GAACAGAACAATCCTGTGTGTGTCGCCAAGCTATGGTGTGACGGAGGTCACATAACCTCT  
TACAGCCTCCATTTCTTGCCTGTGAACTGGAGATATATTGCCCTCATCGAGTTGTGAA  
GATTAATGAAAGAGTGTATATTGAAAATACTTAGCATAGTGCTTGGCTCAGAGTAAGTG  
TCCAAAAAGTGTGTTGCTCCCATCTCTCCTCCCCTTAATTGCATTTTGTTCCCCACCCAA

C

>3236 len=159 tot-seq=3

TGGGGAATATTGCGCAATGGGGGAAACCCTGACGCAGCGACGCCCGTGCGGGATGAAGG  
CCTTCGGGTTGTAAAGCTCTTTTATTAGGGAAGAAAGGTTAAGATAGGAAATGATTTTAG  
TTTGACTGTACCATTTGAATAAGTATCGGCTAACTATGT

>3237 len=100 tot-seq=2

TGAACCCTGAGACTGATTTAGGCATGCAGGAGTTTGGCTGAATAAAGGTAGCTTAAGGTC  
TGTTTTGTTTTGGAGATTGGAGGTGGGGGGATTAGATACC

>3238 len=100 tot-seq=2

GAGCCGCAGGTCGGGCCTGAACTGCCGCTGGGAGAGGAAGCAGCGCCCTTGCCAGGAACG  
TGGGGCTGTGGTAGCAGCAACACCTGCTCCAGCTTACCT

>3239 len=101 tot-seq=2

GAGAGGGAAGTCCCCTTTGTCACCAAGTCCCTGGGGAGCCTGAGAAAGGAAGGATACAAG

TGCAGTGGTCCCTCTAGGGCAGCTTTCAGCGAGGCTGGACA

>3240 len=101 tot-seq=2

GAGGGTAACTTGAGCAAGTGGGAAGAGCCAGGGCAGGAAACAAACAGGACTTAAGCAAAGA

CAGGTGAAAAGTGCTGAGAGAAGACAGAGAGCTCAGATAGC

>3241 len=101 tot-seq=2

GTAGGGTGGACCTCTCATTAGGCCTTCCTATGGTGCACCTGGCTGTAGGCAGCAGGGAGC

AGGGTGAATTAATCCCCGGGCCCTAAAGAATGCACGTGTG

>3242 len=101 tot-seq=2

CGAGGAAGAGAGCCTGGCAGGGCAGACGGGGGATGAGCAAGGGCTGTGGCCGCAGCCAGG

GGAGCCCTGTGCCAGGGAGAGCTGGCACTGTCCTCTTCAC

>3243 len=102 tot-seq=2

GAAGGGCTGCAGGTAGACGTGCGGAGAGCGGACGCAAGAATGGAAAAAGCGTGAAACGCC

CCTCTTATCAGCAGGAAGACACGGGCGACTGGCGACAGTTCT

>3244 len=103 tot-seq=2

TGGGGAATATTGCACAATGGGGGAAACCCTGATGCAGCGACGCCCGTGAGCGAAGAAGG

CTTTCGGGTCGTAAAGCTCTGTTGTTTGAGAAGATAATCACGG

>3245 len=103 tot-seq=2

GCAGGAAAGGGTGAGCACATGCCAAGCAGCAACAAGAGAAGACAAGAAGCCTCCAAGAGA

GTATGTATTTCTCTGCAGAAGAGGAATGGTGAGGGGGCCATTA

>3246 len=103 tot-seq=2

CATCTTCTCTTAAATATTCTCTGCCAGAGCAGAGCATGGCCTCCATCAGTAGGGTGAC

CATAGGATTGGCTGTTCAAAGAGACACTTTACAGTTGCACTTC

>3247 len=103 tot-seq=2

CCCCCTCATCCCTGTGCCACCCTGGCTTTACCCAGCTGTGTGCAAAGTTGTGTTTCAA

GCTGGAGCTCGGAGCATGCTCCCTCCAGGGTCCCACCCAAACC

>3248 len=104 tot-seq=2

GGATCACTGACATCATGGCTATTAGAGACCTAAAATCTTATGGACATACTATGGTAACGG

TTGCCATCATACTGTGATATCAATATAACATAGACCTCCATGA

>3249 len=104 tot-seq=2

TAGGGAATCTTCCACAATGGACGCAAGTCTGATGGAGCAACGCCGCGTGAGTGAAGAAGG  
GCTTCGGCTCGTAAAGTCTGTTGTTGGGAAGAAGGACACGGG

>3250 len=104 tot-seq=2

TAGGGAATCTTCCACAATGGACGCAAGCCTGATGCAGCAACGCCGCGTGAGTGAAGAAGG  
CTTTCGGATCGTAAAGCTCTGTTGTCGGGAAGAAGGATAGAGG

>3251 len=104 tot-seq=2

TATTCAAAGCAATGGCCTGGAGTGAATCTAGACAGAGCCCTGAGCCCTCCACTATTTACA  
GGCAAGGTGAGGAGGAACAAGCAAAGGAGACTAAGAGGGAATCG

>3252 len=104 tot-seq=2

GGACTCCAGCCAGGGAGACAGCAAGGCCGCCAGCCAGTGGCAGCTGCTGACCTTCTGGCC  
ACAGAGAAAGGACAGACACATGGGGAATAATTTACAAACACAGG

>3253 len=104 tot-seq=2

GCAGGCAGGCAGGCAGGCAGGAAGGAAGGAGTTGTAGATCTTTGGCAGCCCAAAGGGTA  
AGAGTCTCTCCAGATTCCCTGGGGATTCAAGCACCTGTCGGTC

>3254 len=104 tot-seq=2

ATGATTTGAAATGAATTTCTAGGAAGGGTATATAAAAGAATTGTTTGTTTCAGAGTTGATC  
CAATCCCTGAAAAAATAAGGATGAAGTCAAGTTATATCCAATAT

>3255 len=104 tot-seq=2

AGCCACAAGAAGACAATTCTCCTTTGAGCCAGCGAATGCCTGTCCCTGAAAAGTCTGGAA  
GCCACCCCTCTGCTGCCACCAAGTGGCCGTGACGAGCCTGAAAA

>3256 len=105 tot-seq=2

AGACCAAATAGGACTAATTAAGCAGTGTGGTTTTTCAACCAACACGATATTTCCACTGG  
GTATCAAATTCACGTTTCAGGTTGAGAAGAGGGTGTGAGTAAGCCA

>3257 len=105 tot-seq=2

TGGGAATATTGCGCAATGGGGGAAACCCTGATGCAGCGACGCCGCGTGAGGGATGAAGG  
CTTTCGGGTCGTAAACCTCTTTTGTGGGAGCAAGCTTTCGGGT

>3258 len=105 tot-seq=2

TAGGGAATCTTCCACAATGGACGCAAGCCTGATGGAGCAACGCCGCGTGAGCGATGAAGG  
TTTTCGGATCGTAAAGCTCTGTTGGTGGGAAGAAGGATAGAGGT

>3259 len=105 tot-seq=2

GGGAGTGAGGTGAACTCTGTGAGGGTCCTTAGTTGTATTTTGTAAAGTGCCTGGTTTT  
GTGTTGGCTGGCCTCCAGCCAGTAGGTGGCATTTC AAGAGCATA

>3260 len=105 tot-seq=2

GAGAGGCAGCAGCAAGGTGAGAGGCAGCAGCAAGGTGAGAGGCAGCAGCAAGGTGAGAGG  
CAGCAGCAAGGAACAGAGCCGGTTCCTCAGGGCTAGGGACATGGA

>3261 len=105 tot-seq=2

GAAGGGTTTCGGCTCGTAAAGCTCTGTTGTTGGAGAAGAACGTGTGTGAGAGTAACTGTT  
CCCGAAGTGACGGTAGCCAACCAGAAAGTCACGGCTAACTACGTG

>3262 len=105 tot-seq=2

GAGGCTCAGAGCCAGGGCCAGGGAGGCAGGTGGAGAGGGTGTCCGTGGAGGGGCTGCACC  
GTCAGCCTGGGCCCCCAGTGGAAGCAAAATAGAAAGGCCCTGTG

>3263 len=105 tot-seq=2

CACTGGAGGCAGCATAGTGGTCGTGCCAGAGTTATGGGAGAAAACACGTGTCAGTTGGAC  
CTAACTGCATCATAGAGACTTCATCGTTAGGGTCCACAAACCAGG

>3264 len=106 tot-seq=2

AGAAGGGTTGCGGCTCGTAAAGCTCTGTTGGTAGTGAAGAAAGATAGAGGGAGTAACTGG  
CCTTTATTTGACGGGAATTACTTAGAAAGGCACGGCTAACTACGTG

>3265 len=106 tot-seq=2

TAGGGAATCTTCCACAATGGACGCAAGTCTGATGGAGCAACGCCGCGTGAGTGAAGAAGG  
GTTTCGGCTCGTAAAGTTCTGTTGTTGGGAAGAAAGAAAGGGGAA

>3266 len=106 tot-seq=2

CTACCTGTGATAACTGTGCTTTTCACTAAAGAAAACCTGGGACACCTGACCTCCTCCTT  
GGTCACAAGCCCTGAGTCAGGCAATTATAGTGCAATGACTTCACAC

>3267 len=106 tot-seq=2

CATGGGACTCTTGTTACATGGTCCATGCACACTGAACTTAAATATTGATTTTCAAGAAT  
AACTTCAGGTTGCTCATCACTTGTCTGCCTGGGTGTTTACTTCCA

>3268 len=107 tot-seq=2

TGGGTAAGGAGGCCAGCTGTGGGTAAGGAAGCCAGCTGTAGGTAAGGAAGCCAGCTATGG

GTAAGGAAGCCAGCAGTGGGTAAGGAAGTCAGCAGTGGATAACGAAG

>3269 len=107 tot-seq=2

TGGGTAAGGAAGCCAGCTGTGGGTAAGGAAGCTAGCTGTGGGTAAGGAAGCCAGCTGTGG

GTAAAGAAGCCAGCTGTGGGTAAGGAAGCCAGCTATGGGTAAAGAAG

>3270 len=107 tot-seq=2

TAGGGAATCTTCCACAATGGACGCAAGTCTGATGCAGCAACGCCGCGTGAGGGAAGAAGG

TTTTCGGATCGTAAAGCTCTGTTGTTGGGGAAGAAGGTTAGAGGCAG

>3271 len=107 tot-seq=2

CTTAECTTTTTCTCTCTGAGCACGAGCAAGCCGAGCTTGTCTGGCTCTCCATTGTCT

GTCTGCAAAGATGGACATCTCTGGCTTTCTCTCTCTTTCTCTGGGTG

>3272 len=107 tot-seq=2

TAGGGAATCTTCCACAATGGACGCAAGTCTGATGGAGCAACGCCGCGTGAGTGAAGAAGG

GTTTCGGATCGTAAAGCTCTGTTGTTGGAGAAGAAGGTTAGGGGGAG

>3273 len=107 tot-seq=2

TGGGGAATATTGCGCAATGGGCGCAACCCTGACGCAGCCACGCCGCGTGCGGGATGACGG

CCTTCGGGTTGTAAACCTTTTTGATTGGGAGCAAGCCTTTTTGGGTG

>3274 len=107 tot-seq=2

TGGGGAATCTTGCAGCAATGGGGGCAACCCTGATGCAGCGACGCCGCGTGCGGGATGAAGG

CCTTCGGGTTGTAAACCGCTTTTGTTGGGAGCAAGCCTTTTTGGGTG

>3275 len=107 tot-seq=2

TGGGGAATCTTCCGCAATGGGCGCAACCCTGATGCAGCGACGCCGCGTGCGGGATGAAGG

CCTTCGGGTCGTAAACCGCTTTTGATTGGGAGCAAGCCTTTTTGGGTG

>3276 len=107 tot-seq=2

TGGGGAATCTTCCGCAATGGGGGCAACCCTGATGCAGCGACGCCGCGTGCGGGATGAAGG

CCTTCGGGTTGTAAACCGCTTTTGATTGGGAGCAAGCTCTCGGGTGA

>3277 len=107 tot-seq=2

TAGGGAATCTTCGGCAATGGACGGAAGCCTGACCGAGCAACGCCGCGTGAGCGAAGAAGG

TTTTCGGATCGTAAAGCTCTGTTGTTAGAGAAGAACGTTGGAAGGAG

>3278 len=107 tot-seq=2



GACAAAGAAACGCTCAACGAACTGAGCGTCAATGAGGTCTTCGAGCGACGGCTGGCACAA

GAGCCTGAAATGGCCGAAGAACGTCGGCAACGCATGAACCAGATGTT

>3279 len=107 tot-seq=2

CAGTGATCTGGGCTTCGGAGGCTTGTGAGAGCCTCCCCTGGCCTCCTTGCCTGCGGTG

GGGTGGGCGTGCTCCCTCTCCTCCATGATGCTGGCACAGTGGGTAAC

>3280 len=107 tot-seq=2

CCAACACCACCCCATGTGTCACTTAGTATCATCTCAGCAAGTTTCTTCAATCTCATGCC

CCCTTATTTTCTTCTCTGCTTACGAAGCCGGAGGAACCTTCTACT

>3281 len=108 tot-seq=2

AGCGACGCCGCGTGCGGGATGAAGGCATTTCGGGTTGTAAAAAGATTTTGATTGGGAGAAA

GAATTTGGGTGAGTGTACCTTTCGAATAAGCGCCGGCTAACTACGTG

>3282 len=108 tot-seq=2

TGCAGGGCCCGGCCGGAGTGGGCATTTGTCACAGTGATTCTGACTACATCTGTACACACG

GTGCCGGGAGTGATGCTGCTATGCTGGCTGCCTTCCTTAGCCCAGAGT

>3283 len=108 tot-seq=2

TCGGGAATCTTCCACAATGGACGAAACCCTGATGGAGCAACGCCGCGTGAGGGAAGAAGG

TTTTCGGATCGTAAAGCTCTGTTGTTGGTGAAGAAGGATAGAGGTAGT

>3284 len=108 tot-seq=2

TAGGGAATCTTCCACAATGGACGCAAGTCTGATGGAGCAACGCCGCGTGAGTGAAGAAGG

GCTTCGGCTCGTAAAGCTCTTTTGGTGGGGAGGAAGGACAGGGGTAGT

>3285 len=108 tot-seq=2

TAGGGAATATTGCACAATGGACGCAAGCCTGATGCAGCAACGCCGCGTGAGTGAAGAAGG

TTTTCGGATTGTAAAGCTCTGTTGTTGGTGAAGAAGGATAGAGGTAGT

>3286 len=108 tot-seq=2

CTGGCGTTGTCCAGCCCAGATTTCCGTTGGGGAGATTGGCTGGTCCAAGCTGCAGAAAG

TGGTAGGACAGCCCAGAGCTTCTTGAAATACGACCTCCATGTCCAGG

>3287 len=108 tot-seq=2

GCGCGCAAATTACCCACTCCCGACCCGGGGAGGTAGTGACGAAAAATAGAGGTAGTAACT

GGCCTTTATTTGACGGTAATTAAGTACGAAAGTACGGCTAACTACGTG

>3288 len=108 tot-seq=2

GAAGAAGGGTTTCGGCTCGTAAATCTCTGTTGTTGGTGAAGAAGGACAGGGGTAGTAACT  
GACCTTTGTTTGCCTGTAATCAATTAGAAAGTCGCGGCTAACTACGTG

>3289 len=108 tot-seq=2

AGACCCTCAAGCAGGGTTGCTCAGGGTGACCCTGTGCTTTCCAGAGCCCGTTTGCTGTCC  
AGGGGATGAGGGCTTAGCTTTGGCGATTATGTGGTCCCTAATAAGTTC

>3290 len=109 tot-seq=2

TAGGGAATCTTCGACAATGGACGCAAGTCTGACCGAGCAACGCCGCGTGAGTGAAGAAGG  
TTTTCGGATCGTAAAGCTCTGTTGTTGGAGAAGAAGGAGTGGGGGAGTG

>3291 len=109 tot-seq=2

TAGGGAATCTTCCACAATGGGCGCAACCCTGATGCAGCAACGCCGCGTGAGTGAAGAAGG  
TTTTCGGATTGTAAAGCTCTGTTGTTGGTGAAGAAGGTTAGGGGTAGTA

>3292 len=109 tot-seq=2

CCCTGATGCAGCGACGCCGCGTGGGTGAAGGAGCGTTTCGGAGCGTAAAGCCCTATCGGC  
AGGGAAGAAGATGACGGTACCTGACCAAGAAGCCCCGGCTAACTACGTG

>3293 len=110 tot-seq=2

TTTACTTGTTGATGGGTGGTGGTGGCTAACCATGTGGTGTACGATCCTTGCATGGTG  
CTTTTGTGGTATAGAAGGGAACTTTAGCTCCAGCCACGCCGGAGAATTGG

>3294 len=110 tot-seq=2

ATACCAGCCTCTGGCCTCCACAGGCACCCAACACACATAAACAACCAACAAATGAACAA  
ATAAATACCTGGGCCTCAATCTAGCAGGTGCCCAAGCATGAGGAGAAAGG

>3295 len=110 tot-seq=2

GAGCAGCAGGAGAGGCAGCAGGAACAGCAACAGCAACAGCAGCAGCAGCAGCAGGTGCAG  
CAGCAGAAGTAGCAGCAGCAGCAGGACCAGGAGCAGCAGGAGCAGCAGGT

>3296 len=110 tot-seq=2

TAGGGAATCTTCCACAATGGACGCAAGCCTGATGCAGCAACGCCGCGTGAGGGAAGAAGG  
CCTTCGGATCGTAAAGCTCTGTTGATGGTGAAGAAGGATAGAGGTAGTAA

>3297 len=110 tot-seq=2

CGGGAAGAACAGCAGCTGGTTGTGAGACAGGTCCAGCGTCTCCAGCTCGAAGGCAGCCTC

TCCCCGGTCGCGAGGAACCACTCCAGGACGTTGTAGCTGACGTTGAGGA

>3298 len=110 tot-seq=2

GATCACTTGAGGTCAGGAGTTCAAGACCAGTCTGGCCAACATTTAGGTGAGATCCTGTCT

CTGCTAAAAGTACAAAAATTGGCTAGGCATGGTAGCAGGCACCTGTAACC

>3299 len=110 tot-seq=2

GTGTAGTAAGAAAAGGATCTAGGCAGGAGTCCTCTTAGGACAAGTCCCTGGGCTTCTACA

TCTTTCATTTTTATCTACAGTAGTGGTTTTTCATTCAAGTGTGGTCTGGGA

>3300 len=110 tot-seq=2

TGGGAATCTTGCGCAATGGGGGAAACTCTGACGCAGCGACGCCGCGTGCGGGATGAAGG

CCTTCGGCTCGTAAACCGCTTTTGATTGGGAGCAAGCCTTCGGGTGAGTG

>3301 len=110 tot-seq=2

CAGGCCACTCCCTGCCTTGATCAGACCACAGCCTCGCCTGCCGGCCACCCCTCTCAG

AGCAGGTTGTAACGTTACCTCCTGCCATCATGAAGCCACCTCCAGCCCTC

>3302 len=110 tot-seq=2

CTCCAGGTCATAGGTGGATTGAAAGATTTTCTGACTGAAATTGGTTGAAAGAGTTATG

TTATCTTTTTATTTATTTATTTTTTTGAGACAGAGCCTCACTTTGTAC

>3303 len=111 tot-seq=2

GTTCTAGTCTCCAGCTCTTTAGAGCCAGAAAACCTCCCTGCTGGAAGGAAGGACACCTAA

GTCTCCTAGCTCTGCTGGCTACTGAGGTACCAGTCCAATCTCAGAGTCAGC

>3304 len=111 tot-seq=2

GGGTTTGTATCGATGTCCTTGCCCATGTTACCACCAAAGGCCCTGAGGCCGGCCCTGGT

CTGGGCGTCTTGCCAGTGCCATGGTAGATGTCTAGGGGCTGTGCTTAGCCA

>3305 len=111 tot-seq=2

TAGGAATCTTCCACAATGGACGAAAGCCTGACGGAGCAACGCCGCGTGAGTGATGAAGG

TTTTCGGATCGTAAAGCTCTGTTGATGGTGAAGAAGGATAGAGGTAGTAAC

>3306 len=111 tot-seq=2

TGTAGGCCACTGCCCCACCTTCAGGGCTATAGTTTCTTTCTTCTGAAACCACACAGGAC

ATGAGAATCCCAGACTGGGCTGCCCTTCCTGGAAGAGGATGTGTGTGTGAG

>3307 len=111 tot-seq=2

TAGGGAATCTCCACAATGGACGAAAGTCTGATGGAGCAACGCCGCGTGAGGGAAGAAGG  
CTTTCGGATTGTAAAGCTCTGTTGTTGGTGAAGAAGGATAGAGGTAGTAAC

>3308 len=111 tot-seq=2

ACTGGCCAGGAGCCTCTCCAGGGGTTGACCACGTCCTGGGCAAGATGGCTCAGGTTGGT  
AGAAAGCCGTTCTCCCATGACAGGGGATGCAAGCCATTTGCACCCTTCACG

>3309 len=111 tot-seq=2

GGTCACGAAAGGAAGGGGCACCCAGGAGCTGGGGGATGCTTGGAGGGAGGGAATGAGTGG  
GCAGACAGAGGGAACAGCTGGGGGTTGAAGGGACCTGGGGAGAGAAGAGAA

>3310 len=111 tot-seq=2

TGAATGAATGAAGTAAAATGGTATTTATCCATTTCTGAAAAGGTCCAGGGTTTGGCTCT  
GCAGGGCCAAGAGAACAGCTTTAGCTGTGCCTTAACCCAGTCCTGGAGAAG

>3311 len=112 tot-seq=2

TAGGGAATCTCCACAATGGACGCAAGTCTGATGGAGCAACGCCGCGTGAGTGAAGAAGG  
GTTTCGGCTCGTAAAGCTCTGTTGTTAGAGAAGAACAGCGCATAGAGTAACT

>3312 len=112 tot-seq=2

TGGGGAATATTGCGCAATGGGGGCAACCCTGACGCAGCGACGCCGCGTGAGGGATGAAGG  
CCTTCGGGTTGTAAACCGCTCTTGATTGGGAGCAAGCCTTTTGGGTGTGTGT

>3313 len=112 tot-seq=2

TGAGGAATATTGGTCAATGGGCGCGAGCCTGAACCAGCCCAGTAGCGTGAAGGAAGACGG  
CCCTATGGGTTGTAAACTGCTTTTATGTGGGGATAAAGTGC GCGACGTGTCA

>3314 len=112 tot-seq=2

TAGGGAATCTCCACAATGGACGCAAGCCTGATGGAGCAACGCCGCGTGAGGGAAGAAGG  
TCTTCGGATTGTAAAGCTCTGTTGTTGGGGAAGAAGGATAGAGGCAGTAACT

>3315 len=112 tot-seq=2

CAGTGAGAGTGAGGAGGAAGACGTGGGAGAGTACCGTCCCCACCACCGAGTGACCGAGGG  
CACCATCAGGGAGGAACAGGAGTATGAAGAAGAGGTGGAGGAAGAACCCCGC

>3316 len=113 tot-seq=2

CTCCAGGCCCTTCCCCGGGTGGGTCCAGAGGACACTCCCCTCCTACCCCGTAGCCTCCA  
CTAGTGGAAGGTGGTGAAGACAGAGGTGTCCTTGAGTCCACAGGGCCTCTGGT

>3317 len=113 tot-seq=2

GGAAGGACTTCTCCTGGGATAATTTCAACGTCCCTTTGATTGATTCAATTCGATAAACCTC  
CATCCAGCTTCTGACTCTCCATACACCTGGGACGCTCTGCTACCTTTTGAAC

>3318 len=113 tot-seq=2

TAGGGAATCTTCGGCAATGGACGCAAGTCTGATCGAGCAACGCCGCGTGAGTGAAGAAGG  
TTTTCGGATCGTAAAGCTCTGTTGTTAGAGAAGAAGGTTGGTAGGAGTGGATA

>3319 len=113 tot-seq=2

TAGGGAATCTTCCACAATGGACGCAAGTCTGATGGAGCAACGCCGCGTGAGTGAAGAAGG  
TAACTGACCTTTGTTTGACGGTAATCAATTAGAAAGTCACGGCTAACTACGTG

>3320 len=113 tot-seq=2

GGAGAGGGGAGCCAGGGAGAACACAGCCTCAGTCCTGGAAGGAGAGGGCCTGCTGGGAAG  
AACAGAACCCAGCTGTCTTGGCCCCAGGTGAGCCCTCACCTGTGCCTCAGGCC

>3321 len=114 tot-seq=2

GTGAGTGAAGAAGGGTTTCGGCTCGTAAAGCTCTGTTGGTAGTGAAGAAGGACAGGGGTA  
GTA ACTGACCTTTATTTGACGGTAATCACTTAGAAAGTCACGGCTAACTACGTG

>3322 len=114 tot-seq=2

GTGAGTGAAGAAGGGTTTCGGATCGTAAAGCTCTGTTGTTGGTGAAGAAGGACAGAGGTA  
GTA ACTGGCCTTTGTTTGACGGTAATCAATTAGAAAGTAACGGCTAACTACGTG

>3323 len=114 tot-seq=2

TGAGTGAAGAAGGTTTTTCGGATCGTAAAGCTCTGTTGTAAGAGAAGAATGGGAGTGAGAG  
TGGAAAGTTCACCTCCGTGACGGTATCTTACCAGAAAGGGACGGCTAACTACGTG

>3324 len=114 tot-seq=2

GTGAGTGAAGAAGGGTTTCGGATCGTAAAGCTCTGTTGTTGGTGAAGAAGGAAAGGGGGA  
GGAAATGAACTTTGTTTGACGGTAATCAATTAGAAAGTCACGGCTAACTACGTG

>3325 len=114 tot-seq=2

GATCACTGTGGTCACTTGCAAACATGTGAGATGCTGGGAGCCCTTTGTATAGAAGCAAGG  
GACTGCGTGGAAGGAGTGGGAGGTAGTGGGGATTCAGAAATGGA ACTTGTGTGC

>3326 len=114 tot-seq=2

ATGGCCTTTCTCAAAGGATGAGCAGGCCTGCTGACAGCTTCCCTTTGAGCTTCATGTCT

CCAGAACTGCCAGGGAGTACATTTCCATTGACACACTGTTGGTGGTGATTTGCT

>3327 len=114 tot-seq=2

ACAACTGTGTTTCATCTGAAAGGAGGAGGCCCACTCCCGTGCAGGCGCTGCCCTGGGGG

TGAAATTCCCAAGCTTGTGGGGATTCTCCCGCTGGCGTTGCCGCTCTGAATG

>3328 len=114 tot-seq=2

TGAGGCCATTGTGCTGAATGAAATCACCTCTACCCAAAAGGGCTCATTCTGCAGGACTCC

ACTCTAGACACCCTGAGCAGTCAAATTCATAGACAGAAAGCAGGATGGTGGTGG

>3329 len=114 tot-seq=2

CAGTTGGAGCCTGTCAAGTGGGCGAGGTGGGGTTTTTCCCTTTGTCCTTCATTCTAACTG

CTCTTTCTCCTTTTCTCAACATGTGTAGGTGGCAGCTGGTCTAAGCACCAAAC

>3330 len=115 tot-seq=2

GAGCTACAAGAAGCAGTCATCTGTGGGAAAGGCCCAAGTGGGGAAAAGTAAGAAATCTGG

AGATGAGAGAAGGGGACAGTAGGTAGGGCCATTAATGATTCTGGATTCAAACCTG

>3331 len=115 tot-seq=2

TGGCCTTTTAAGAGATTTTTTTTTTTTTAAAGAAAAGTGGTTTTTCTGCTTAAACATTAG

TAACTGGAGCCAACAATCACTGTCCCCACCATGCCTGTCACTCTTCACTCCCCAC

>3332 len=115 tot-seq=2

GGAGAAGGTCGAGAATCAAGACCAGCGTCTGACGAGGAGAAAGCTTTGTTTGAAATGCT

AAGGCTACTTCTACAATGCGTGTAACCTACGTAAATGTTGTAGCAATGGTCGTTT

>3333 len=115 tot-seq=2

CGTGAGTGAAGAAGGGTTTCGGATCGTAAAGCTCTGTTGTTGGTGAAGAAGGATAGAGGT

AGCAACTGGCCTTTATTTGACGGTAATCAATTAGAAAAGTCACGGCTAACTACGTG

>3334 len=115 tot-seq=2

GCTGGGTGGCAAACGGGCGGGGGCGGAGGGGCCGGTGTGGGCTTACATCTCCTGCTTC

CCTGAGCGCTGCACGGCAGCTTGCCCTTCTTATAGAGGAAATAGAGGACAGCGC

>3335 len=116 tot-seq=2

AGGGATGCATGCTGTGTGCCAGCAGCCATGGTCAGGGACAGAGGCAGCAGAGGGATGCA

TGCTGTGTGCCAGCAGCCATGGTCAGGGACAGAGGCAGCAGAGGGATGCATGCTG

>3336 len=116 tot-seq=2

TAGGGAATCTTCCACAATGGACGCAAGCCTGATGGAGCAACGCCGCGTGAGTGAAGAAGG  
TTTTCGGCTCGTAAAGCTCTGTTGTTGGTGAAGAACGTGAGGGGGAGTAACTGGCC

>3337 len=116 tot-seq=2

TGGGGAATATTGCACAATGGGCGCAAGCCTGATGCAGCCACGCCGCGTGAGTGATGAAGG  
CCTTCGGGTTGTAAAGCTCTTTCACCGGAGAAGATAATGACGGTATCCGGAGAAGA

>3338 len=116 tot-seq=2

TAGGGAATCTTCCACAATGGGCGCAAGCCTGATGGAGCAACACCGCGTGAGTGAAGAAGG  
GTTTCGGCTCGTAAAGCTCTGTTGTTGGGGAAGAAAGTGAGTGGGAGTAACTGATC

>3339 len=116 tot-seq=2

GCGTGAGTGAAGAAGGGTTTAGGCTCGTAAACTCTGTTGGTGGTGAAGAAGGACAGGGG  
GAGTAACGGACCTTTGTTTGACGGTAATCAATTAGAAAGTCACGGCTAACTACGTG

>3340 len=116 tot-seq=2

TGATTGCAGATACAACCTTCTTCCATCTCCCTACTCCACACACCCTACTGAGCCACCCC  
AACCCCACTGCCCTAACCTATGCTTCACTCTTGTGATTTCTAAGGGGTTTGTGTTT

>3341 len=116 tot-seq=2

GCGTGAGTGAAGAAGGGTTTCGGCTCGTAAAGCCCTGTTGTTGGTGAAGAAGGACAGGGG  
TATTAAGTGGCCTTTGTTTGACGGTAATCAATTAAGGTCACGGCTAACTACGTG

>3342 len=116 tot-seq=2

GTAGTGCTGAGAGGAGCTGCAGGCACTGCCAGCGCTTGGCTCTGCCTCTCAGATCCCCCT  
ACTCTCTGGAAAGCTTGCCGCGGTGAGGAGGGGGCTGATTCATAGCAATTTTCTAC

>3343 len=116 tot-seq=2

ATCCAACAAAGACAAAGAAAAAAGAATTTAAAAAATGAACAAAACCGCACTCAGTGCTCA  
ATGGTGCCAGGCTGGAGTGCAGTGCCGTGATCTCAGCTCGCTACAACCTCCACCT

>3344 len=116 tot-seq=2

TAGGGAATCTTCGGCAATGGGCGCAACCCTGACCGAGCAACGCCGCGTGAGTGAAGAAGG  
CTTTCGGATTGTAAAGCTCTGTTGTAAGAGAAGAACGTGTGTGAGTGTGAAAGTT

>3345 len=117 tot-seq=2

TTTTTTTTTCAAGCAGAAGACGGCATAACGAGATGTAAACTGCTTTTGTACTAGGGTAAAC  
CTATCTACGTGTAGATAGCTGAAAGTATAGTACGAATAAGGATCGGCTAACTCCGTG

>3346 len=117 tot-seq=2

CACTGCTATGTGTTATTTTCACAGAAGTTAATAACCAGCAGCCGCAGTAATCTACAGATC  
GGAAGAGCGTCGTGTAGGGAAGAGTGTGCCAATGTGTAGATCTCGGTGGTCGCCGTA

>3347 len=117 tot-seq=2

GAAGCCGGGAGGGGAGGCCGGCCGGGGAGACCGCAGGAAGCCGGGAGGGGAGGCCGGCCC  
GGGAGACCGCAGGAAGCCGGAAGCCGGGTCTCTAGGAAGCCGAGGGAGTGTGTGAGC

>3348 len=117 tot-seq=2

CGCTGAATCCAGAGCTGCTCCAGCCTCAGCAGCCCTATCTGTGATGGCATGCTGATGTCA  
TCAGACCAAAAAGCCCTTGCAGGTTTCAACTCGGCAATTAACGGCTCCTCTGAAGC

>3349 len=117 tot-seq=2

TGAGCCAAGATCACGCCATTACACTCCAGCCTGGGCAACAGAGCAAGACTCTGTGTCAAA  
AATAAATAAATAAATAAATAAGCAATGATCTCCCCACCCAGATGGGTAAACTGAGG

>3350 len=117 tot-seq=2

TGGGTGGGGGGTGGCAGGCAGGTTACCCAGCAACTCCGGCTTCTTGTGGACAGAATCT  
GGTAGAAGATGTGGTAGTTTCTCTCAGCTTTCAGCTGGAAGATCACCCGGGACTTCT

>3351 len=117 tot-seq=2

GAAGTTTTTGGGAGGAGACAGCAGACTGGGGAGCAAGTCAGTTCTCACGGCCGCTGAATA  
ATTCACAGGGCAGCCGGGATGGCATATGCTTCTCTAAGCCCTTAGCAGCAGGAATG

>3352 len=118 tot-seq=2

TGGGGAATCTTCCGCAATGGGGGCAACCCTGACGCAGCGACGCCGCGTGAGGGATGAAGG  
CCTTCGGGTCGTAAACCGCTTTTGATTGGGAGCAAGCCTTTGGGAGAGTGTACCTTT

>3353 len=118 tot-seq=2

CCGCGTGAGTGAAGAAGGGTTTCGGATCGTAAAGCTCTGTTGTTGGAGAAGAAGGAGTGA  
GAGAGTAACTGGTCACGAAGTGACGGTAGCCAACCAGAAAGTCACGGCTAACTACGTG

>3354 len=118 tot-seq=2

TGGGGAATATTGCGCAATGGGCGCAACCCTGATGCAGCGACGCCGCGTGAGGGATGAAGG  
CCTTCGGGTTGTAAACCGCTTTTGATTGGGAGCAAGCTCTCGGGTGAGAGCACCTTTC

>3355 len=119 tot-seq=2

GCTAAAAGGGAGGCTAAAAGGAAAGAGAAAGTAACCACTGAGATTGAGCAAGTGAGATCT



GCTGCGTGTAATTTTTTTTAAATCACACTTCTGCCTTCCCAAGAGCTCTACCCACACTC

>3356 len=119 tot-seq=2

CTTTGGACTCTGCAAAGGAGACACGAGACAGAGATCAGACGTGGTGTGACCACACAGCCA

CATGAACAACCTGCCAGAATAACTGGCCGGGCAAGAGAGAAACGTGCCCGTCCCGCATC

>3357 len=119 tot-seq=2

GGGGGAAAAGAACACACACACGACCCCAAACTGTAGTCTCCTTCTCCCTCTGCTGC

CCCCTGGACCAGCAAGAGGAAAATACACCTTGTTGTCCACCAGAGATGAAAAAGGATCC

>3358 len=120 tot-seq=2

GGAGGAACTCTGGACCAGCAACGCCGCGTGAATGATGAAGGTCTTCGGATGGTAAAGTT

CGTTTCTAAGGGAAGAAGATAGTGGCGGTACCTTAGGAATAAGCCGCGGCTAACTACGTG

>3359 len=120 tot-seq=2

GAAAGACGGAGGCAGAGAAGCCGCGTGAGGGAGGAAGGCCTGCGGGGGTAAACCGCGGG

AAGCAGGGAAGAGGCAGCAAGGTGAAGGGACCTGCAGAAGAAGACCCGGCTAACTACGTG

>3360 len=120 tot-seq=2

TGGGAATCTTGACAATGGGCGCAAGCCTGACGCAGCGACGCCGCGTGCGGGATGAAGG

CCTTCGGGTTGTAAACCGCTTTTGATTGGGAGCAAGCCTTTTTGGTGAGTGTAACCTTCG

>3361 len=120 tot-seq=2

AATTCAACATGAGATTTGGTGGGGACACAGGTCGAACTATATAAATAGTCCCACAAAC

CCAATCCACAATCCCCGACCTGGAAGAGCTCCAAAAACCCAGAGGCTTTTTGTAACCCAC

>3362 len=120 tot-seq=2

CAAGAGAGTATTGAAAGTCTCCTAGGTGCAGACCTTCCCTTCCCAAGGCTTTTCCTTC

CTAGGCAATCCCCTGAGCTGGATATCACATGGGAGGGAATGCTTCTTATGGTCTCTGTA

>3363 len=120 tot-seq=2

CTTCTTTTCTTTGGGTAGATACTCAGTAGTGGGATTGCTGGATTGAATCATAGATCTAT

TTTTAGTTCTTTGGGAAATTTCCATACTGTTTTCCACAGAGGTTGCACTAATTTACATTC

>3364 len=120 tot-seq=2

TGAAAACCCCAAGGCAAGCGTGGAGAGTAGAACAGCTCCAGGGCAGTGGGAAGATGAG

GTCACCCCGCATGTTGACGGACACCAAGGGTGGGGGTGGAGGATGTGAAGGGGATCAGC

>3365 len=120 tot-seq=2

CAGAAAAGAACCACAGTGAGTTAATCCCGAGCATCGAGGACCAGGAGGGGCACCACTTTA  
AATGGCTTATCGCTATTGATGTGCCAGTCCTGCTCCTTAGTTTTCTAATAAAAGCCCTCA

>3366 len=120 tot-seq=2

TGAGCTGTGATCATGCCTCTGACTCAAGCATGGGCAACAGAGCAAGACCATGTCTCTAAA  
ACAATGAAATATTATAAAAAACAAAACATACGTCATCATATCATTGAGGGCTCAACATTCT

>3367 len=121 tot-seq=2

GAGAAAGAGTGACAATCCAAGTTGAGGAAATAGAGAAGATTGGGAGGAGTAGAATAAGGT  
GCACCTACTGTGTGCTAAATACTGTAATGCTTTACATATGATAGACCAATTGACCT

T

>3368 len=121 tot-seq=2

GACCCTTACTGGGCCTCTGTGTATATCTCCTGGTCTTTATACCCATTCCCTGGGTCCCTC  
ACTTGCTCCCAGACCCTGTAATTGCCACTGGGAAGTCCTTAGCTATTCATCATCCCCACA

G

>3369 len=121 tot-seq=2

AAACCCATGATGCTCTCCAAGGCTGGTTCCTTCTCTGTGCAGAGGGCCTCAGGTAATCAT  
CTGCCTCTACACTGGGGCTCTGAGTGAGAGCTCAGCATTCTGCTTCCCAAAAATACCTA

C

>3370 len=121 tot-seq=2

CTTAATCTTCTCCTTCTTTGAGCAGTGGACTTGAGCAGCTGGCGGGAGAAGATTGCTCG  
GGATGTGGCTGGGGCCACCTGGGGTAATGGCTCTGGGGAGGAGGAGGAAGAGGAGGATGG

C

>3371 len=122 tot-seq=2

TCAGAACGGCAGCTCCATATATTATTCAATCCAATCAAATAAGACACAGTGGTGCCTCAG  
TAACTTGCTTTTCATATCAGAATTGGTCTTATTGAGTAATACACACGGCAGACCCACAGC

TT

>3372 len=122 tot-seq=2

GCTTAGGAGTGTTAAAGGCTTAGGGAGGTTGGAGGGGAAGGTTCCCTGGCCGGGCTGGCTC  
GGACTGTTTATCTCTGAGAAGGGCTGCCTGACTGGGTGGTTTTGGCTGAATTTACCTCT

CC

>3373 len=122 tot-seq=2

GGGCAGCTCTCTGGTGAGGAAGGAAACTCACACCTTGGCCAACCTCTTCGAAACCTGCC  
TTCTGCCCCAGCTTCCATCCAGTGTGATCTACCCACGGACTATTACAGCCAGTCCTCAC  
TC

>3374 len=122 tot-seq=2

CAAAGGCAAACCCAGTCCATCCTCGCTTCCCCGTGCCACAGCCAGCTTGTGCCGGCCC  
CCACCAGGCACAGATGCAACACCCTGCACTCGATGCCACAGAAGCCCCTCTGCAGAGCC  
GG

>3375 len=122 tot-seq=2

GCATCAGGGCATGTGGACGTGGTGAGGACAGAGGCAGCCACGGGCGTGTAGGAAGAAGCT  
TGGCAGAAAAAAGGGGTGAAAGAGGGAGAACAAGGCAGGCGGGAGAAGAGTATGGGA  
GC

>3376 len=123 tot-seq=2

CAATCTCGTGCCTCGGGATGCGCAGGATGAGCTCCTCGTTGTCGCGCCAGGTGAGCAGCA  
GGCAGCGTGCAGGACAGGCTCAGGATGCTGCTCCTGCTCTGGTGTGGTCTTCAGAGGCAACT  
CCT

>3377 len=123 tot-seq=2

GGAGCTGAGGCAGCGGGATGCTCTCATCGACGAGCTGGAGCTGGAGTTGGATCAGAAGGA  
CGAACTGATCCAGAAGCTGCAGAACGAGCTGGACAAGTACCGCTCGGTGATCCGACCAGC  
CAC

>3378 len=123 tot-seq=2

TCAGCCAAGCAGAGCTGTAACATTGAGCTCTAACACTAACCTAAGGCTCTTTTAAGAGCC  
ATCATTTTTCTAGTAGGCAGTAGAGCTGATAAGACAGGCAAGCCTGATACCCCCACTC  
CGA

>3379 len=123 tot-seq=2

TCAGCTCGCACATTTGTTCTTTATTCCCAAGGAGAACATGAGGAAAGGACGTAGATATC  
GCCCAAATGTATAATTTACCAGGTAAGAAAAGCCCAATGGCTTTCTAATTATTGCTGGAT  
GTC

>3380 len=123 tot-seq=2

TGGGGAATATTGCGCAATGGGGGAAACCCTGACGCAGCGACGCCGCTGCGGGATGAAGG  
ACAGGGGTAGTAACTGACCTTTGTTTGACGGTAATCAATTAGAAAGTCACGGCTAACTAC  
GTG

>3381 len=123 tot-seq=2

GGTGGGGGCCTTTCATCCTCACATTAGCACCGAGAGCTCGGGAGCTGCTTCTGTGCACAC  
CCAGACTGTCCCCAGCACCTCTAGCCTGCTCACAGCTGGGCACACGGCCACCTCTCTCC  
CCT

>3382 len=124 tot-seq=2

TGGGGAATATTGGACAATGGGCGAAAGCCTGATCCAGCAATGCCGCTGGGTGAAGAAGG  
TCTTCGGATCGTAAAGCCCTTTCGGCGGGGACGATGATGACGGTACCCGCAGAAGAAGCC  
CCGG

>3383 len=124 tot-seq=2

GGGCCAGCAGAGAGGAGAGGTGACTAGAGGAGGGGTCACAAGACCATATACGCAGGCAGC  
CTCTAGAAGCTGGGAAGGCCAGGAAACCAGGAAAGCTGGGAAGGCCAGGAGCCTGCAGGA  
GGGA

>3384 len=124 tot-seq=2

GCAGCAGGCAGCAGGCAGCAGGCAGGTTCACTCTTGAACCCAGGTGACCTACGATT  
CTCATTTGTCAGCCACACATGTTCTCACTCTCTTTCCCCCAAAGACTTCTCTTTTCT  
CCAG

>3385 len=124 tot-seq=2

CCGTGAAAGGGCCCGCAGGGCCGCTCCTACGCCTCCTGCAGGTCGGAAGCAGTCAGTGCT  
GCCCCGACCCCTCGTGAACCGGACGGCCTCAAAGCACGACCCAGAGGGCCCTGGCA  
GCCC

>3386 len=124 tot-seq=2

GCAACGCCGCTGAGTGAAGAAGGGTTTCGGCGCGGAAAGCTCTGTTGGTAGTGAGGAAA  
GATAGAGGTAGGAACTGGCCTTTATTTGACGGTAATTACTGAGAAAGTCACGGCTAACTA  
CGTG

>3387 len=125 tot-seq=2

CAGCCAGGAATGTTCCCAAGTTCAGGCTACATGGCAAGACCCTCTTCTGTGCCAACAG

TTGGTGGCTATGATAAACATCAACTCCATCCCATGCCACTTCACAGTGACCCATTTTGCA  
GTTGC

>3388 len=125 tot-seq=2

GCACAGGAACAGACCCAGCAAGGCCAGAGATAAGAGATGGAGAAGGCAGCTTAGCCTGGA  
AGAAAAGAACCTGACGAGGTTGAAGGGAGGGAGCACAGTTTGAGTTTGAGCATCGTTGTG  
AGAAC

>3389 len=125 tot-seq=2

ATGAAAGCCATGTGGTTTAAAGGGCCAGATAGTAAATATTTTCAGGCTTCATAGGCCATTT  
GTGGTCTCCATCCCATAACATTTTATCTTTTAAAATATTTCTTCCAACGCTTTAAATGCGT  
AAAAT

>3390 len=125 tot-seq=2

GCAGGCCTAGACTCTTGGGTGAAGAAATACCTAACTCTTCTTTTCGGTGAGAAGGGAGTT  
GACAGCTCTACCACACAGAGGCCTGCCAGGAAACAGCAGGGACACTCATGGTCTCTTAGA  
GACTT

>3391 len=125 tot-seq=2

TAGGGAATCTTCCACAATGGACGCAAGTCTGATGGAGCAACGCCGCGTGAGTGAAGAAGG  
TTTTCGGATCGTAAAGCTCTGTTGTTGGTGAAGAAGGATAGAGGTAAGTCACGGCTAACT  
ACGTG

>3392 len=125 tot-seq=2

AATGCTATGTCACTATATACAGAAACAAGACAACCTGAAGCTAAATGGATGCCCCCTGCA  
GAGTCAACAGGTCCAGCCTCACAGTGCACGCCCTGAGCTACAGCCTCTCCAAAAGGCAT  
CTTCC

>3393 len=125 tot-seq=2

TCACGAGGGCAGCTCAATTCGAACCTTGCGCAAGCCACGGCATGTCGTATCGGATATAAA  
AATGCCACAGTCGTCTCCCTACCCCTCTAGTCTTACGCATGGGACCTGTGGATTCTCTC  
ACGCT

>3394 len=125 tot-seq=2

AGCAACGCCGCGTGAGTGAAGAAGGGTTTCGGCTCGTAAAGCTCTGTTGTTGGTGAAGAA  
GGACAGGGGAAGTAACTGGGCTGAGTTTGACGGTAATCAATTAGAAAGTCACGGCTAACT

ACGTG

>3395 len=125 tot-seq=2

AGCAACGCCGCGTGAGTGAAGAAGGGTTTCGGCTCGTAAAGCTCTGTTGTTGGTGAAGAA

GGATAGAGGTAGTAACTGGTCTTTGTTTGACGGTAATCAATGAGAAAGGCACGGCTAACT

ACGTG

>3396 len=126 tot-seq=2

AGACTGAGGGAAGGGCCAACCAATAGCAGACCTAACGACCAATTTTCATGGGAAAGCACCA

ATCTCTAACTCTATTAATGATGCTATGCTTGTAGACAGGAGCTTCTTATCCTCTGAGAGA

CTTCAC

>3397 len=126 tot-seq=2

TGGGTAAGGAAGCCAGCTGTGGGTAAGGAAGCTAGCTGTGGGTAAGGAAGCTTGCTGCGG

GTAAGGAAGCCAGCAGTGGGTAAGGAAGCCAGCTGTGGGTAAGGAAGCCAGCTATGGGTA

AAGAAG

>3398 len=126 tot-seq=2

GCCCTGGGGTGGGAAGTAAAAGGTGAGAGTGAGAACACCCCTCAAGAGAACTTGAAGAAG

GAGCAGAATGGGACCAGTGAGTTCATTTTAGTGAAGGCTGATGCAGCATAACCCCGGGC

CTTCCT

>3399 len=126 tot-seq=2

AGGACCACCCCAAGGAGGCAGCAAGTCCCGAAGTGCCCGACCTCCTCCAGGAAAGCC

ACAAGGACCACCCCAACAAGAAGGCAACAATCCTCAAGGTCCCCACCTCCAGCAGGAGG

CAATCC

>3400 len=126 tot-seq=2

GGGCGCTGCAATCACAACAGTGAGAGGCTGGGTGGCTCCGGGAACAGAGTTCACACACA

CTCAATCCACCCTCTCTCACAGCTCAAACCTCTACCTTAAACTTCTGGGTGAAGCCCG

TTCTCT

>3401 len=126 tot-seq=2

ATCTGGTGTCTGTTTAGGTATAGAATTAACCCACAAGGTCAAACAAGGAAAGTTCCC

AAGAAAAGAACTTTATAATCCAAAAGATTATTACAGATAGCATTATATTGTATATCATT

AGGTGT

>3402 len=127 tot-seq=2

GGCTAGTGACAAGCTTCTTCTGCCCTATAAAGCAAAAGTTTCTGTACCTTTATCTGTCT  
GCCACTGACTCTTCCTTTAAGCAAAAACCCCTTTTGTTTTAGAAACTGAAATCCCAGAAC  
TACAGTC

>3403 len=127 tot-seq=2

GTCCCCACAGCCAAGCCCGTGCCCTGGCTGCCCCCTCCCACTGGCCCCAGCCTCCGCTTG  
CTCCAATCTTCTCCTCAGATTCCCAGTTTGCAAGTCCCTCTTCTCCATCCATCCTCT  
ACCACAT

>3404 len=127 tot-seq=2

ACACAGGGGTGAAGCCCAAGGGCTCTAGAGCCAGACAGGCCAAGTTCAAATTCCAAGTGT  
ACCACTGAACTAGCTGAGCAACATTGGGCGATGCTTTACTCCAACCACCACTCCTAGCCT  
TTCCTCC

>3405 len=127 tot-seq=2

AGTCTAGGTTGCAGCTCAAAGACAGAGTTGATAGTTTTGTCAGGCAGAGGTGTTGTGGA  
GGAGTGTATCATTGCTGAGGAGGTCTATGATGGATGGTAGAGCAGCAACTAAGCTGGCCT  
CAGAAGT

>3406 len=127 tot-seq=2

CTGAACCAGCCAAGTAGCGTGCCAGGATGACGGCCCTATGGGTTGTAACTGCTTTTATAT  
GGGAATAAACTGCATTACGTGTAATGTTTTGCATGTACCATTGAATAAGGACCGGCTAA  
TTCCGTG

>3407 len=128 tot-seq=2

CTGTGGGCACGTTGGGCAGGTCTGCCAGACAACCTAGAGTTATCTGTGTCCTTGATCTTG  
GTCTTTTGGTGGTATAGGTGGAGATGATAGCGTGTGAACAAGCATGTGAGTGTGCTTTAC  
TCCAGGGG

>3408 len=128 tot-seq=2

CCAGAGACAGAGGTTCTGACCCTCAGCTTCAAGGAACCAGGGCCACCAACAGGCAGGCCT  
TGAGATCCTGTGACCACTCATGCCCCAGTTCTCCACATGACCTCCTGCAGCCACAGAG  
CAGTGTGC

>3409 len=128 tot-seq=2

GAGCGAAAATTGCCAATCCCGACACGGGGAGGCAGTGACGAGAAATAACAACCTTTGGT  
TATTCTAAGAAGTGTAAATGAGGATAATTTAAAGCCCTTACCGAAAGCAATTGGAGGGCAA  
GTCTGGTG

>3410 len=129 tot-seq=2

GGAGCAGGTGAGAGAGCCCAGGGCAGTGAGCGAAGAGAGGCAGGAGATGGTGGCACAGGG  
GATCTATTTTGAAGGTAGGACCCACAGGATTTGCTGATGGATAGGATGCAGCGGACAGAA  
GACAGAAGT

>3411 len=129 tot-seq=2

GACAGGAAGAAAGAGGTGGATGGAGAGCTCCAGTGGGCCCTGGCCCAAGACCTGATCCA  
AGTACAACCCAGCCAAACCACGGGCGTCCGGGCAATCCAAGAGTCTGCCTCCCAATT  
GGGTAAAGC

>3412 len=129 tot-seq=2

GGAAGAAGGCCATGCAGAAGGCAAGGACTGACTAGGCAATTATGTCAGCAGATCCTGGCC  
TAATGGGGCATTTTTAACAGACACTTTTGCCTCAGTGGCCAGAACTCATAATCCAGAG  
GAACTGTGC

>3413 len=130 tot-seq=2

GATAAATTTACTTGAGCTTTTCATGTAGCTGGGGTTTTATGTTTGAATGGGAAACGTTG  
GGGTTGGTTGCCAATCATATTCCTGAGGAGAGGTGTCAATCAGCTGCTGCTGAGACACAA  
GCTGCACACC

>3414 len=130 tot-seq=2

GATGGAGCAACGCCGCGTGAGTGAAGAAGGGCTTCGGCTCGTAAAGCTCTGTTGTTGGTG  
AAGAAGGAAAGGGGTAGTAAATGAAATTTGTTGACGGTAATCAATTAGAAAGTCACGGC  
TAACTACGTG

>3415 len=130 tot-seq=2

GCAGCGTTAGCAGGGGACAGAGCTCCCTCTAGTGGGCCTGGATGGCAAAGATGGTTCAGA  
GTGGATGGTGTGCGGGCACTGGGAGCACAGGTATGCCTAGCAATTGGGGAACAGGCAGA  
GGAAGAGAAG

>3416 len=130 tot-seq=2

CATTCACCCATTTACACAAGGGAAAATGAAAGCTCAGAGAGGGACAGTGGTGTGCCTCA



GGCCACACAGCCAGTGTGTGGCAGAGCTGGGACTTGAACCAGATCTGTGGCTCAGAGTCC  
ACGAATTCCA

>3417 len=130 tot-seq=2

GAGAGAGAGCAAAGGGGGGAGCTGCCAAACACTTTTATAACAATCAGATTTTGTGAAAAC  
CTCCCTCATATCATGAGAACAGTATGGGAGAGCCCACCCCATTAATTCAATCACCTCCCA  
CCAGGTCCCT

>3418 len=131 tot-seq=2

TGATGGAGCAACGCCGCGTGAGTGAAGAAGGGTTTCGGCGCGTAAAGCTCTGTTGTTGGT  
GAAGAAGGACAGGGGGAGTAACTGACCGTGGTTTGACGGTAAGCAAGTAGAAAGTCACGG  
CTAACTACGTG

>3419 len=131 tot-seq=2

CCGCCAGTGTGGAACAGCTTGCTTCTTGAGGAATCAGTATTTGACCGCTCTTAGACA  
TATCCCGCAGCCTGGCTCCGAGGCAGAACTACGCCCGCAGCCTGGCCTGTGGACCCCTC  
CTCCGGCACCC

>3420 len=131 tot-seq=2

TAGTACTAGTGGCAAAGGGACAGACAGCCAAGGAAGAAAGAGTAGCTCCACTCCCGTCGG  
TCCTTCCCTTGGGGAAGAGGAAGGAGAGAGGAGAACAGCAGAATACGCGGCTCACAGAG  
GCAAGGAAAGA

>3421 len=132 tot-seq=2

AGAAATGTATTAGGGGCTTGATCATTCTGTCTGAGTGGGCCACAGCCAGAGACTTTGT  
GACCTCTGACTATTAGGAAGTTTACAAGCCAAGGTACACACGCAAGTGTCTACTCCCCCT  
GGTAAAGAAGCC

>3422 len=132 tot-seq=2

CCTTACTTTTCTCATGAGAAAATGTGATTTTTGACCTTAAAAATATTGGCATGCTGAAAT  
GTTGGAGATTAATTTTAACAAGTGATGACCGTTTGTATGATTGTTTATTTGGTGTCAT  
GTTTTGCATTCC

>3423 len=132 tot-seq=2

CTGATGGAGCAACGCCGCGTGAGTGAAGAAGGGTTTCGGCTCGTAAAGCTCTGTTGTTGG  
AGAAGAACGTGAGTGGGAGTAACTGTTACAGAGTGACGGTATCCAACCAGAAAGGGACG

GCTAACTACGTG

>3424 len=132 tot-seq=2

CTGATGGAGCAACGCCGCGTGAGTGAAGAAGGTTTTCGGGTCGTAAAGCTCTGTTGTTGA  
AGAAGAACGTGAGTGAGAGTAACTGTTACGAAGTGACGGTATTCAACCAGAAAAGTCACG  
GCTAACTACGTG

>3425 len=132 tot-seq=2

CTGATGGAGCAACGCCGCGTGAGTGAAGAAGGGTTTTCGGATCGTAAAGCTCTGTTGTTAG  
AGAAGAACGCGAGTGAGAGTAACTGTTCAATGACGGTATCCAACCAGAAAAGTCACG  
GCTAACTACGTG

>3426 len=132 tot-seq=2

AAAGGGGACTTCACAGAGCGAGAGGAGGCCGCGCAGGCTGTGCGCCCCTATCCAGGGCT  
GTCAATCTTCTCTTTCACAAGCACTAATTTTTCTTGATTTTTCTGCAAGCCCAGATCTAC  
TGCTGAACTACC

>3427 len=132 tot-seq=2

CTGAGGGAGCAACGCCGCGTGAGTGAAGAAGGGTGGCGTCGCGGAAAGCGCGGTTGTTGG  
TGAAGAAGGACAGGGGTAGTAACTGACCTTTGTTTGACGGTAATCAATTAGAAAAGTCACG  
GCTAACTACGTG

>3428 len=132 tot-seq=2

TAGGGAATCTTCCACAATGGACGCAAGTCTGATGGAGCAACGCCGCGTGAGTGAAGAAGG  
GTTTCGGCTCGTAAACTCTGTTGTTGGGAAGAAGGACAGGGGTAGTGAAGTACTGACCTTTG  
TTTGGCGGGAAT

>3429 len=132 tot-seq=2

GCTCTAATGAATGTGCTCCTGACACCCCTGGTTGGGACTCTCAGGCAAGCCGTACCCCTG  
AGTAAGGGCGGGTGCCAGAGTCGGCCTGCAGCGTCGGGAGGGCACAACCCCAACTGGCCT  
ATTCCAGACCTC

>3430 len=132 tot-seq=2

CGAAGTGGAGGGACTCTCCACTCGGTAAGTAGGTTCAATTTAGAGTGCCTTGCTCGTCTCGA  
TCGCTGGGAGCCTCCAGTGGCAAGCCGAGGACTCCAAAGCTGCCTGTGTACTTGTGAGAG  
AGAGTGCTGTGC

>3431 len=132 tot-seq=2

CCCCCTTTGCCTCCAAACCCAGTGCATTCCCAGCTTTTTCTTGGTCTCCACACTCCAG  
TCCAAGCCTCTGTCCTGTCCCCAGAATTCCTGAAGAAGGTCCAGGGAGAGGGCTGTGAG  
TTCTCTATAAGA

>3432 len=132 tot-seq=2

AGGAAAGAGGAAGAAGAAGGAGAGAGAGAGTGTCCAGAGTAGGAAGCCCCAGAGAATTA  
GCCAAGGTGCCACCCGGGCTATGAGGGAAGTGGGGAGCTGGTGGAGAAGAAAGGGGGCGG  
AAAGCCACAGGG

>3433 len=133 tot-seq=2

TGGCTTCTAGAACTTCCGGAGAGGAGTCAGAGGCCAGGTAGAGGGCATCTAAGGAGAA  
TCCTTCCTGCCAGCACCCATAAAACGAGGCAGAGCATGACCTGTGTGATGGTCTGTTA  
ACAGCCTGGAGGC

>3434 len=133 tot-seq=2

AAAGGATGAGTCAGCTGGTTCCTCCCAGGTGACTGTGAAAAGTCACACAAGGTAGTGAA  
TGGTAGATGCGCTCCTTACAAGCTGTGATATCCTATGAAGCTATTAATTTTTATCCCGTG  
GTTTCTCACATTA

>3435 len=133 tot-seq=2

GATGGAGCAACGCCGCTGAGTGAAGAAGGGTTTCGGCTCGTAAAGCTCTGTTGTTGGTG  
AAGAAGAACGTGCGTGAGAGTAACTATTCACGCAGTGACGGTATTCAACCAGAAAGTCAC  
GGCTAACTACGTG

>3436 len=133 tot-seq=2

CCTGGACAATTGGAGCATGTAATGACTATGGATGCAATGGTTCAGATGCGCAGTGGACGA  
CGAGCATTAGCTCCAGCCTCATGGAGGAGACCCACAAGCGCCCCCGCTGCAGAACCTTCT  
GCACGGCCTCTGT

>3437 len=133 tot-seq=2

TGACCCCTGTCACAACCGTGCCGGGGTCTCAGGCCACTCTCCACCGCGGGTCCCCGTG  
TCGCCGCGGCCCGTTTGTATTAGATCAGTCTGTGAGGAAGGGTTCGAGGCGTGTGGTCCA  
CCCGTGGCCCCGCA

>3438 len=133 tot-seq=2

AGAGAGAGTTGTATTTAGCTAGTGTTATGGTTTCACTAGGGCTGCTGAAACAAAGTGCCA  
TAAAGTGGGTGGCTTTCACAATAGACGTCTACTGTCTCACAGTTCTGGAGGCTAGAAGTC  
TGAGAACAAGGTG

>3439 len=133 tot-seq=2

TTAGGAATCTTCCGCAATGGGCGAAAGCCTGACGGAGCGATACCGCTTGAAGGACGAAGC  
CCTTCGGGGTGTAACCTTCTGAACTCGGGACGATAATGACGGTACCGAGGTAATAGCACC  
GGCTAACTCCGTG

>3440 len=134 tot-seq=2

TAGGGAATCTTCCGCAATGGGGAAACCCTGATGCAGCGACGCCGCGTGAAGGAAGAAGTA  
TCTCGGTATGTAACTTCTATCAGCAGGGAAGAAAATGACGGTACCTGACTAAGAAGCCC  
CGGCTAACTACGTG

>3441 len=134 tot-seq=2

AACGGCTGAGGCCACCTTGCTGGTTCTGTCAGCTCCGACCCAAAGCTTTTGGGGCCTCA  
TTCTGTACCATACCCAGTGCCACGAATGCCAGCAGCCATGGCAGCTCTTCTTCACAGT  
CATTCTTTCAGCCA

>3442 len=134 tot-seq=2

TAGGGAATCTTCCACAATGGATGCAAGTCTGATGGAGCAACGCCGCGTGATTTAGAAGGC  
CTTCGGGTTGTAAAAATCTTTTGTATGGGAAGAAAATGACAGTACCATACGAATAAGGAC  
CGGCTAATTACGTG

>3443 len=134 tot-seq=2

TGGGGAATATTGGACAATGGGGGGAACCCTGATCCAGCAATGCCGCGTGAGTGAGAAGGC  
CTTCGGGTTGTAAAGCTCTTTTAGATGGGAAGATAATGACGGTACCATCAGAATAAGCAC  
CGGCTAACTTCGTG

>3444 len=134 tot-seq=2

TGGGGAATATTGCACAATGGGGGAAACCCTGATGCAGCGACGCCGCGTGAACGAAGAAGG  
TATTCGTATCGTAAAGTTCTGTCCTATGGGAAGATAATGACAGTACCATAGAAGAAGCAC  
CGGCTAACTCCGTG

>3445 len=134 tot-seq=2

TGTTCTGGAATCCTTTGTGAGGGACAAATATTCAGACCCTCGTAGCAATGTTATGGAATC

CCATGTGCTATATACACCTTCAGACCCCCGTAGCAGTGTTCTCGAATGCTATGTGAGGGA  
CAAATAATCAGAAC

>3446 len=134 tot-seq=2

TGGGGAATCTCCGCAATGGACGAAAGTCTGACGGAGCAACGCCGCGTGAGTGATGACGG  
TCTTCGGATTGTAAAGCTCTGTTAATCGGGACGAATGGTCGGTGTGCAAATAGAAAGTCA  
CGGCTAACTACGTG

>3447 len=134 tot-seq=2

CAGGCTGGAGGTGACAGGGCGTGCCTGTATGCCAGGGTGTGGACAGAGACCTCGGGAGGC  
TCCTCCACAGCTGACAGAGGTGCAAGTGTGTTACACAGGGTCCAGGGCTTATCCAGCAGG  
AGGCAGAACCCATT

>3448 len=134 tot-seq=2

TAGGGAATCTCCACAATGGGGGAAACCCTGATGCAGCGACGCCGCGTGATTTAGAAGGC  
CTTCGGGTTGTAAAAATCTTTTTTATGGGATGAAAATGACAGTACCATAAGAATAAGGTC  
CGGCTAAATACGTG

>3449 len=134 tot-seq=2

TAGGGAATCTCCACAATGGACGCAAGTCTGATGCAGCGACGCCGCGTGATTTAGAAGGC  
CTTCGGGTTGTAAAAATCTTTTTTATGGGATGAAAATGACAGTACCATAAGAATAAGGTC  
CGGCTAAATACGTG

>3450 len=134 tot-seq=2

TTTTTCAAGCAGAAGACGGCATAACGAGATAAGAGAGTGAAGTGGAGTTCAGACGTGTGTC  
TTCCGATCTCTACGGGAGGCAGCAGCCGCGTAATAAAGAGATCGGAAGAACGTCGTGT  
AGGGAAGAGTGTGC

>3451 len=134 tot-seq=2

GGCCACTGGTCCCTCAGTCACACAGCGGCAGGGTGAGCTCCTGATCTCCAGCAGGCCCCCT  
CCATCTGCACGTCCATCGCTGGAATGTAGCAGGTGCTGGGCTAGGCCCTAATAACATAGG  
TTCATCCCCCACC

>3452 len=134 tot-seq=2

CCCACAGACTCGGGCTCTGGAGGTCTACAGAGCAGCTGGGAGGGTGATGCCTAGGCGGGG  
GCGGAGATGCCAGGCCCTGGGCTGCAGGTGGAGGTAATGGGGAAGGGAGGCCGGGGGT

CTCTGGGCCTTTCG

>3453 len=134 tot-seq=2

GCGCGCAAATTACCCAATCCCGACACGGGGAGGTAGTGACAATAAATAACAATATAGGGC  
CTTACAGGTCTTATAATTGGAATGAGTACAATTTAAATCCCTTAACGAGGAACAATTGGA  
GGGCAAGTCTGGTG

>3454 len=134 tot-seq=2

CCGGACCGAGCAACGCCGCGGGAGGGAAGAAGGGTTGCGGATCGTAAAGCTCTGTTGTAA  
GAGAAGAACGTGTGTGAGAGTGGAAGTTCACACAGTGACGGTAACTTACCAGAAAGGGA  
CGGCTAACTACGGG

>3455 len=135 tot-seq=2

TAGGGAATTTTCGTCAATGGGCGCAAGCCTGAACGAGCGATGCCGCGTGAGTGAAGAAGT  
ATTCGGTATGTAAAGCTCTATCAGCAGGGAAGAAAATGACGGTACCTGACTAAGAAGCC  
CCGGCTAACTACGTG

>3456 len=135 tot-seq=2

TGGGGAATATTGCACAATGGGGGAAACCCTGATGCAGCGACGCCGCGTGAGCGATGAAGT  
ATTCGGTATGTAAAGCTCTATCAGCAGGGAAGAAAATGACGGTGCCTGACTAAGAAGCA  
CCGGCTAACTCCGTG

>3457 len=135 tot-seq=2

TAGGGAATCTTCCGCAATGGGCGAAAGCCTGACGCAGCGACGCCGCGTGAAGGATGAAGT  
ATTCGGTATGTAAACTTCTATCAGCAGGGAAGAAAATGACGGTACCTGACTAAGAAGCC  
CCGGCTAACTACGTG

>3458 len=135 tot-seq=2

TGGGGAATATTGCACAATGGGCGCAAGCCTGATGCAGCCATGCCGCGTGAGTGAAGAAGT  
ATTCGGTATGTAAAGCTCTATCAGCAGGGAAGAAAATGACGGTACCTGATTAAGAAGCC  
CCGGCTAACTACGTG

>3459 len=135 tot-seq=2

TGGGGAATATTGCACAATGGGCGCAAGCCTGATGCAGCCATGCCGCGTGTAGGAAGAAGG  
TTTTCGGATTGTAAACTCCTGTCGTTAGGGACGATAATGACGGTACCTAACAAGAAAGCA  
CCGGCTAACTACGTG

>3460 len=135 tot-seq=2

TGGGGAATATTGCACAATGGGCGCAAGCCTGATGCAGCAACGCCGCGTGAACGATGAAGG  
TCTTCGGATCGTAAAGTTCTGTTGCAGGGGAAGATAATGACGGTAATCAATTAGAAAAGTC  
ACGGCTAACTACGTG

>3461 len=135 tot-seq=2

TGGGGGATATTGCACAATGGGCGAAAGCCTGATGCAGCGACGCCGCGTGAGGGAAGACGG  
TTTTCGGATTGTAAACCTCTGTCTTCGGGGACGAAAATGACGGTACCCGAGGAGGAAGCC  
ACGGCTAACTACGTG

>3462 len=135 tot-seq=2

TGGGGAATATTGCACAATGGGGGAAACCCTGATGCAGCGACGCCGCGTGAGCGAAGAAGT  
ACCTCGGTATGTAAAGCTCTATCAGCAGGGAAGAAGATGACGGTACCTGACCAAGAAGCT  
CCGGCTAAATACGTG

>3463 len=135 tot-seq=2

TGGGGAATATTGCAGAATGGAGGGAACCTGATGCAGCGACGCCGCGTGAGCGAAGAAGT  
ATTTCCGGTATGTAAAGCTCTATCAGCAGGGAAGATAATGACGGTACCTGACTAAGAAGCT  
CCGGCTAAATACGTG

>3464 len=135 tot-seq=2

TAGGGAATCTTCGGCAATGGACGGAAGTCTGACCGAGCAACGCCGCGTGAGTGAAGAAGG  
TTTTCGTATCGTAAAGCTCTGTCCTATGGGAAGATAATGACGGTACCATAGGAGGAAGCT  
CCGGCTAACTACGTG

>3465 len=135 tot-seq=2

TGGGGAATATTGCACAATGGGGGAAACCCTGATGCAGCGACGCCGCGTGAGCGATGAAGG  
AATTCGTTTCGTAAAGCTCTGTCCTAGGGGAAGATAATGACAGTACCCTTGGAGGAAGCC  
CCGGCTAAATACGTG

>3466 len=135 tot-seq=2

TGGGGAATATTGCACAATGGAGGGAACCTGATGCAGCGACGCCGCGTGAACGAAGAAGG  
CTTTCGAGTCGTAAAGTTCTTTTATATGGGAAGATAATGACAGTACCATACGAATAAGGA  
CCGGCTAATTACGTG

>3467 len=135 tot-seq=2

TGGGGAATATTGGGCAATGGGCGCAAGCTTGACCCAGCAACGCCGCGTGAAGGAAGAAGG  
CTTTCGGGTTGTAACTTCTTTGATCAGGGACGAAAATGACGGTACCTGAAGAACAAGCC  
ACGGCTAACTACGTG

>3468 len=135 tot-seq=2

TGGGGGATATTGCACAATGGGGGAAACCCTGATGCAGCGACGCCGCGTGAAGGAAGAAGT  
ATCTCGGTATGTAAAGCTCTATCAGCAGGGAAGATAATGACGGTACCTGACTAAGAAGCT  
CCGGCTAAATACGTG

>3469 len=135 tot-seq=2

TGGGGAATATTGCGCAATGGGGGAAACCCTGACGCAGCGACGCCGCGTGAACGAAGAAGG  
TCTTCGGATTGTAAAGTTCCGTCCTGGGTGAAGATAATGACGGTAACTCAGGAGGAAGCC  
CCGGCTAACTACGTG

>3470 len=135 tot-seq=2

TGGGGAATATTGGACAATGGGCGCAAGCCTGATCCAGCCATGCCGCGTGAGTGATGAAGG  
CCTTCGGGTTGTAAAGCTCTTTCAGATGGGACGATGATGACGGTACCATCAGAAGAAGCC  
CCGGCTAACTTCGTG

>3471 len=135 tot-seq=2

TGGGGAATCTTGACAATGGGCGAAAGCCTGATGCAGCGACGCCGCGTGAGTGAAGAAGT  
ACTTCGGTATGTAAAGCTCTATCAGCAGGGACGATAATGACGGTACCTGACTAAGAAGCC  
CCGGCTAACTACGTG

>3472 len=135 tot-seq=2

TGGGGAATATTGCACAATGGGGGAAACCCTGATGCAGCGACGCCGCGTGGAGGAAGAAGG  
CCCTCGGGTTGTAACTCCTGTCTTTGGGGACGATAATGACGGTACCCAAGGAGGAAGCC  
ACGGCTAACTACGTG

>3473 len=135 tot-seq=2

TGGGGAATATTGGACAATGGGGGAGACCCTGATCCAGCCATGCCGCGTGAGTGACGAAGG  
CCTTCGGGTTGTAAAGCTCTTTTACATGGGAAGATAATGACGGTACCATGAGAATAAGCA  
CCGGCTAACTTCGTG

>3474 len=135 tot-seq=2

TGGCAGGAGAGGGGGTTGAGGGGAATGAGGGATTGATGGGAACTCACTACAGAGCTCA



GTTGGGAAACTCACACCCATTGGAGCTGGGATTGATTGCTGGAACTTTCTCACCCTTCT  
CAGTTTGTCTCAGAG

>3475 len=135 tot-seq=2

TAGGGAATCTTGCACAATGAGGGAAACCTTGACGCAGCGACGCCGCGTGCGGGATGAAGG  
CCTTCGGGTTGTAAACCGCTTTCAGCAGGGACGAAATTGACGGTACCTGCAGAAGAAGGC  
CCGGCCAACACTACGTG

>3476 len=135 tot-seq=2

TGGGGAATCTTGGACAATGGGGGCAACCCTGATCCAGCGACGCCGCGTGGGTGATGAAGG  
CCTTCGGGTTGTAAAGCCCTTTTGTTCGGGGACGATGATGACGGTACCCGGCGAATAAGCA  
CCGGCTAACTCCGTG

>3477 len=135 tot-seq=2

TGGGGAATATTGCACAATGGGCGCAAGCCTGATGCAGCAACGCCGCGTGAACGATGAAGG  
TCTTCGGATCGTAAAGTTCTGTTGCAGGGGAAGATAATGACGGTATCTGAATAAGAAGCC  
CCGGCTAACTACGTG

>3478 len=135 tot-seq=2

TAGGGAATCTTCGGCAATGGACGGAAGTCTGACCGAGCAACGCCGCGTGAGCGATGAAGG  
CTTTCGAGTCGTAAAGCTCTGTCCTATGGGAAGATAATGACGGTACCATAGGAGGAAGCC  
CCGGCTAACTACGTG

>3479 len=135 tot-seq=2

TGGGGGATATTGGACAATGGAGGTAACCTCTGATGCAGCGACGCCGCGTGAGCGAAGAAGG  
CTTTCGAGTCGTAAAGCTCTGTCCTATGAGAAGATAATGACGGTATCATAGGAGGAAGCC  
CTGGCTAAATACGTG

>3480 len=135 tot-seq=2

TGGGGAATATTGCACAATGGGCGCAAGCCTGATGCAGCCATGCCGCGTGTATGAAGAAGG  
CTTTCGAGTCGTAAAGTTCTTTTATATGGGAAGATAATGACGGTACCATAAGAAAAAGCC  
CCGGCTAACTACGTG

>3481 len=135 tot-seq=2

TGGGGGATATTGCACAATGGGGGAAACCCTGATGCAGCGACGCCGCGTGAGGGAAGAAGG  
TTTTCGGATTGTAAACCTCTGTCCCCGGTGAAGATAATGACGGTAACCGGGGAGGAAGCC

ACGGCTAACTACGTG

>3482 len=135 tot-seq=2

TGGGGAATATTGCACAATGGGGGAAACCCTGATGCAGCGACGCCGCGTGAGTGAAGACGG

CCTTCGGGTTGTAAAGCTCTGTTGTGGGGGACGATAATGACGGTACCCCATCAGAAAGCC

ACGGCTAACTACGTG

>3483 len=135 tot-seq=2

GCGCGCAAATTACCCAATCCCGACACGGGGAGGTAGTGACAATAAATAACGATACAGGGC

CCTTATGGGTCTTGTAATTGGAATGAGTACAATGTAAATACCTTAACGAGGAACAATTGG

AGGGCAAGTCTGGTG

>3484 len=135 tot-seq=2

TGAGGAATATTCCACAATGGGCGAACGCCTGATGGAGCAATGCCGCGTGAGCGAAGAAGT

ATTCGGTATGTAGAGCTCTATCAGAAGGGAAGAAAATGACGGTACCTTACTAAGAAGCT

CCGGCTAAATACGTG

>3485 len=135 tot-seq=2

TGAGGAATATTCCACAATGGGCGAAAGCCTGATGGAGCAATGCCGCGTGACAGGATGAAGG

CCCTCGGGTCGTAAACTGCTTTTATTAGAGAAGAATATGACGGTACCTTACTAAGAAGCT

CCGGCTAAATACGTG

>3486 len=135 tot-seq=2

TGGGGAATATTGCACAATGGGGGAAACCCTGATGCAGCGACGCCGCGTGAGTGAAGACGG

CCTTCGGGTTGTAAAGCTCTGTTGCAGAGGACGATAATGACGGTACTCTGCTAGAAAGCC

ACGGCTAACTACGTG

>3487 len=135 tot-seq=2

TGAGGAATATTGGTCAATGGGGGAAACCCTGACGCAGCAACGCCGCGTGCGGGATGAAGG

CCTTCGGGTTGTAAACCGCTTTCAGCAGGAAAGACATCGACGGTACCTGCAGAAGAAGCC

CCGGCTAACTACGTG

>3488 len=135 tot-seq=2

TGGGGAATTTTGCACAATGGAGGAAACTCTGATGCAGCGACGCCGCGTGAGCGATGAAGG

TCTTCGGATTGTAAAGCTCTGTCCTTGGTGAAGATCGTGACGGTAATCAAGGAGGAAGCC

CCGGCTAACTACGTG

>3489 len=135 tot-seq=2

TGGGGAATCTTGACAATGGGCGAAAGCCTGATGCAGCGACGCCGCGTGCGGGATGAAGG  
CCTTCGGGTTGTAAAGTTCTATCAGCAGGGAAGAAAATGACGGTACCTGACTAAGAAGCC  
CCGGCTAACTACGTG

>3490 len=135 tot-seq=2

TAGGGAATCTTCGGCAATGGGGGGAACCCTGACCGAGCAACGCCGCGTGAACGAAGAAGG  
TATTCGTATCGTAAAGTTCTGTCCTATGGGGAGATAATGACAGTACCATAGAAGAAAGCT  
CCGGCTAAATACGTG

>3491 len=135 tot-seq=2

TGGGGGATATTGCACAATGGGGGGAACCCTGATGCAGCGACGCTGCGTGAGTGAAGAAGT  
GCCCCGGCATGTAAAGCTCTGTCAGCAGGGAAGAAGATGACGGTACCTGACCAAGAAGCA  
CCGGCTAACTCCGTG

>3492 len=135 tot-seq=2

TGAGGAATTTTTACAATGGACGAAAGTCTGATGGAGCAATACCACGTGAACGATGAAGG  
TCTTCGGATCGTAAAGTTCTGTTGCAGGGGAAGATAATGACGGTACCCTGTGAGGAAGCC  
CCGGCTAACTACGTG

>3493 len=135 tot-seq=2

TGAGGAATATTGGTCAATGGGAGAGATCCTGAACCAGCAACGCCGCGTGAGGGAAGACGG  
TTTTCGGATTGTAAACCTCTGTCCTCTGTGAAGATGATGACGGTAGCAGGGGAGGAAGCT  
CCGGCTAACTACGTG

>3494 len=135 tot-seq=2

TGGGGAATATTGCACAATGGGCGCAAGCCTGATGCAGCAACGCCGCGTGAACGATGAAGG  
TCTTCGGATCGTAAAGTTCTGTTGCAGGGGAAGATAATGACGGTACCGGAATAGAAAGCC  
ACGGCTAACTACGTG

>3495 len=135 tot-seq=2

TAAGGGATATTGGTCAATGGGGGAAACCCTGATGCAGCGACGCCGCGTGAGTGAAGAAGT  
ATTCGGTACGTAAAGCTCTATCAGCAGGGAAGAAAATGACGGTACCTGAGTAAGAAGCC  
CCGGCTAACTACGTG

>3496 len=135 tot-seq=2

TGGGGAATCTTGCGCAATGGGCGAAAGCCTGACGCAGCAACGCCGCGTGCGGGATGAAGG  
CCTTCGGGTTGTAAACCGCTTTCAGCAGGGAAGAAATTGACGGTACCTGCAGAAGAAGCC  
CCGGCCAACACTACGTG

>3497 len=135 tot-seq=2

TGGGGAATATTGCACAATGGGGGAAACCCTGATGCAGCGACGCCGCGTGAACGAAGAAGG  
TATTCGTATCGTAAAGTTCTGTCTATGGGAAGATAATGACGGTACCTGAATAAGAAGCC  
CCGGCTAACTACGTG

>3498 len=135 tot-seq=2

TGGGGAATATTGCACAATGGGCGCAAGCCTGATGCAGCGACGCCGCGTGAGGGATGGAGG  
CCTTCGGGTTGTAAAGCTCTATCAGCAGGGAAGAAGATGACGGTACCTGAATAAGAAGCC  
CCGGCTAACTACGTG

>3499 len=135 tot-seq=2

TGGGGAATATTGCACAATGGGGGAAACCCTGATGCAGCAACGCCGCGTGAGTGAAGAAGG  
TCTTCGGATTGTAAAGCTCTGTTCTTGGTGAAGATAATGACGGTAGCCAAGGAGAAAGCT  
CCGGCTAACTACGTG

>3500 len=135 tot-seq=2

TGGGGAATATTGCACAATGGGGGAAACCCTGATCCAGCCATGCCGCGTGAGTGATGAAGG  
CCTTAGGGTTGTAAAGCTCTTTCACCGATGAAGATAATGACGGTAGTCGGAGAAGAAGCC  
CCGGCTAACTTCGTG

>3501 len=135 tot-seq=2

TGGGGAATATTGCACAATGGGGGAAACCCTGATGCAGCAACGCCGCGTGAGTGAAGAAGG  
TTTTCGTTTCGTAAAGCTCTATCTGTGGGGAAGAAAATGACGGTACCCAAGGAGGAAGCC  
ACGGCTAACTACGTG

>3502 len=135 tot-seq=2

TGGGGAATATTGCGCAATGGGGGAAACCCTGACGCAGCGACGCCGCGTGCGGGATGAAGG  
CCTTCGGGTTGTAAAGCTCTGTCTTTGGGGAAGATAATGACGGTACCCAAGGAGGAAGCC  
ACGGCTAACTACGTG

>3503 len=135 tot-seq=2

TGGGGAATATCGGACAATGGGCGCAAGCCTGATCCAGCCATGCCGCGTGAGTGATGAAGG

CCTTAGGGTTGTAAAGCTCTTTCACCGATGAAGATAATGACGGTAGTCGGAGAAGAAGCC  
ACGGCTAACTACGTG

>3504 len=135 tot-seq=2

TGGGGAATCTTGACAATGGGGGCAACCCTGATGCAGCGACGCCGCGTGAGCGATGAAGG  
CTTTCGAGTCGTAAAGCTCTGTCCTATAGGAAGATAATGACGGTACTATAGGAGGAAGCC  
CCGGCTAACTACGTG

>3505 len=135 tot-seq=2

TGAGGAATATTGGTCAATGGGCGGGAGCCTGAACCAGCCAAGTCGCGTGAGTGAAGAAGT  
ATTCGGTATGTAAAGCTCTATCAGCAGGGAAGAAAATGACGGTACCTGACTAAGAAGCC  
CCGGCTAACTACGTG

>3506 len=135 tot-seq=2

TGGGGAATCTTCGGCAATGGACGCAAGCCTGATGCAGCAACGCCGCGTGAACGATGAAGG  
TCTTCGGGTCGTAAAGTTCTGTTGCAGGGGAAGATAATGACGGTACCCTGTGAGGAAGCC  
CCGGCTAACTACGTG

>3507 len=135 tot-seq=2

TGGGGAATATTGCGCAATGGGGGAAACCCTGACGCAGCAACGCCGCGTGAACGAAGAAGG  
TATTCGTATCGTAAAGTTCTGTCCTATGGGAAGATAATGACAGTACCACAGAAGAAAGCT  
CCGGCTAAATACGTG

>3508 len=135 tot-seq=2

TGGGGAATATTGGACAATGGGCGCAAGCCTGATCCAGCCATGCCGCGTGAGTGATGAAGG  
CCCTAGGGTTGTAAAGCTCTTTCACCGGAGAAGATAATGACGGTATCCGGAGAAGAAGCC  
ACGGCTAACTACGTG

>3509 len=135 tot-seq=2

TGGGGGATATTGACAATGGGGGAAACCCTGATGCAGCAACGCCGCGTGAATGATGAAGG  
TCTTCGGATTGTAAATTCTGTTCTTGGTGAAGATAATGACGGTAGCCAAGGAGAAAGCT  
CCGGCTAACTACGTG

>3510 len=135 tot-seq=2

TGGGGAATATTGACAATGGGCGCAAGCCTGATGCAGCAACGCCGCGTGAACGATGAAGG  
TCTTCGGATCGTAAAGTTCTGTTGCAGGGGAAGATAATGACGGTATCTAACCAGCAAGTC

ACGGCTAACTACGTG

>3511 len=135 tot-seq=2

TGGGGAATCTCCGCAATGGACGAAAGTCTGATGCAGCGACGCCGCGTGAGTGAAGAAGT  
ATTCGGTATGTAAAGCTCTATCAGTAGGGAAGATAATGACGGTACCTACATAAGAAGCC  
CCGGCTAAATACGTG

>3512 len=135 tot-seq=2

TGGGGAATCTCCGCAATGGACGAAAGTCTGACGGAGCAACGCCGCGTGAGGAAGAAGT  
ATCTCGGTATGTAAACTTCTATCAGCAGGGAAGAAAATGACGGTACCTGACTAAGAAGCC  
CCGGCTAACTACGTG

>3513 len=135 tot-seq=2

TGGGGAATATTGCACAATGGAGGAAACTCTGATGCAGCGACGCCGCGTGAGTGAAGAAGT  
ATTCGGTATGTAAAGCTCTATCAGCAGGGAAGACAGTGACGGTACCTGACTAAGGAGCT  
CCGGCTAGATACGTG

>3514 len=135 tot-seq=2

TAGGGAATCTCCACAATGGGGGAAACCCTGATGCAGCGACGCCGCGTGAACGAAGAAGG  
TGTTTCGTATCGTAAAGTTCTGTCCTATGGGAAGATAATGACAGTACCATAGAAGAAAGCT  
CCGGCTAAATACGTG

>3515 len=135 tot-seq=2

TGGGGAATTTTGCACAATGGGGGAAACCCTGATGCAGCGACGTCGCGTGAACGATGAAGG  
CCTTCGGGTTGTAAAGTTCTGTCCTTGGCGAAGATAATGACAGTAGCCAAGAAGCAAGCT  
CCGGCTAAATACGTG

>3516 len=135 tot-seq=2

TAGGGAGTCTTCGGCAATGGGGGCAACCCTGACCGAGCAACGCCGCGTGAGTGAAGAAGG  
TTTTTCGGATCGTAAAGCTCTGTTGTAAGAGAAGAACGAGCGTGAGAGTGGAAAGTTCACA  
CTGTGGCGGTAACCTT

>3517 len=135 tot-seq=2

TGGGGAATATTGCACAATGGGCGCAAGCCTGATGCAGCAACGCCGCGTGAACGATGAAGG  
TCTTCGGATCGTAAAGTTCTGTTGCAGGGGAAGATAATGACGGTACCGCGTGAATAAGGA  
CCGGCTAATTCCGTG

>3518 len=135 tot-seq=2

TGGGGAATTTTGGACAATGGGGGCAACCCTGATCCAGCAACGCCGCGTGAACGATGAAGG  
TCTTCGGATCGTAAAGTTCTGTTGCAGGGGAAGATAATGACGGTACCCTGTGAGGAAGCC  
CCGGCTAACTACGTG

>3519 len=135 tot-seq=2

GGGGAATATTGCACAATGGGGGAAACCCTGATGCAGCGACGCCGCGTGCGGGATGAAGGC  
CCTCGGGTCGTAAACCGCTTTCAGCAGGGATGAGACAAGACGGTACCTGCAGAAGAAGCC  
CCGGCTAACTACGTG

>3520 len=135 tot-seq=2

TGGGGAATATTGCACAATGGGGGAAACCCTGATGCAGCGACGCCGCGTGAAGGAAGAAGT  
ATCTCGGTATGTAACTTCTATCAGCAGGGAAAGAAAATGACGGTACACAACAAGGAAGTG  
ACGGCTAACTACGTG

>3521 len=135 tot-seq=2

TGAGGAATATTCCACAATGGGCGAAAGCCTGATGGAGCAATGCCGCGTGCAGGATGAAGG  
TCTTCGGATCGTAAAGTTCTGTTGCAGGGGAAGATAATGACGGTACCCTGTGAGGAAGCC  
CCGGCTAACTACGTG

>3522 len=135 tot-seq=2

TGGGGAATATTGCACAATGGGGGAAACCCTGATGCAGCAACGCCGCGTGAGTGAAGAAGT  
ATTTCCGGTATGTAAAGCTCTATCAGCAGGGAAAGATAATGACGGTACCTGACGAATAAGCC  
ACGGCTAACTACGTG

>3523 len=135 tot-seq=2

TAGGGAATCTTCCACAATGGGCGCAAGCCTGATGGAGCGACGCCGCGTGAGTGATGACGG  
CCTTCGGGTTGTAAAGCTCTGTCTTCAGGGACGATAATGACGGTACCTGAGGAGGAAGCC  
ACGGCTAACTACGTG

>3524 len=135 tot-seq=2

TGGGGAATATTGGACAATGGGCGAAAGCCTGATCCAGCGACGCCGCGTGAAGGAAGAAGT  
ATCTCGGTATGTAACTTCTATCAGCAGGGAAAGAAAATGACGGTACCTGACTAAGAAGCT  
CCGGCTAAATACGTG

>3525 len=135 tot-seq=2

TGAGGAATCTTCCACAATGGGCGAAAGCCTGATGGAGCAACGCCGCGTGCAGGATGAAGG  
CCTTCGGGTTGTAAACTGCTTTTATTAGTGAAGAATATGACGGTAACTAATGAATAAGGG  
TCGGCTAACTACGTG

>3526 len=135 tot-seq=2

TGAGGAATCTTCCACAATGGGGGCAACCCTGATGGAGCAACGCCGCGTGCAGGATGAAGG  
CCTTCGGGTTGTAAACTGCTTTTATAAGTGAAGAATATGACGGTAACTTATGAATAAGGA  
TCGGCTAACTACGTG

>3527 len=135 tot-seq=2

TGGGGAATATTGCACAATGGGGGAAACCCTGATGCAGCAACGCCGCGTGAACGAAGACGG  
CCTTCGGGTTGTAAAGTTCTTTGATTGGGGAAGAAAATGACGGTACCCAAAAACAACCC  
ACGGCTAACTACGTG

>3528 len=135 tot-seq=2

TGGGGAATATTGCGCAATGGGGGAAACCCTGACACAGCGACGCCGCGTGAGTGAAGAAGT  
ATTTCCGGTATGTAAAGCTCTATCAGCAGGGAAGAAGATGACGGTACCTGAGTAAGAAGCC  
CCGGCTAACTACGTG

>3529 len=135 tot-seq=2

TGGGGAATCTTGCACAATGGGCGAAAGCCTGACGCAGCCATGCCGCGTGAATGATGAAGG  
TCTTAGGATTGTAAAATTCTTTCAGTAGGGACGATAATGACGGTACCTACAGAAGAAGCC  
CCGGCTAACTTCGTG

>3530 len=135 tot-seq=2

TGGGGAATCTTCCGCAATGGACGAAAGTCTGACGGAGCAACGCCGCGTGAGCGAAGAAGG  
CCTTCGGGTCGTAAAGCTCTTTTATATGGGAAGATAATGACGGTACCATAAGAAAAAGCC  
CCGGCTAACTACGTG

>3531 len=135 tot-seq=2

TGGGGAATATTGCACAATGGGGGAAACCCTGATGCAGCGACGACGCGTGAGCGAAGAAGG  
CTTTCGAGTCGTAAAGCTCTGTCCTATGAGAAGATAATGACGGTACCATAAGAAAAAGCC  
CCGGCTAACTACGTG

>3532 len=135 tot-seq=2

TGGGGAATCTTCCGCAATGGGCGCAAGCCTGACGGAGCAATGCCGCGTGAGTGAAGAAGT



ATTTCCGGTATGTAAAGCTCTATCAGAAGGGAAGAAAATGACGGTACCTTACTAAGAAGCT  
CCGGCTAAATACGTG

>3533 len=135 tot-seq=2

TGGGGAATATTGCACAATGGGGGAAACCCTGATGCAGCGACGCCGCGTGAGCGAAGAAGG  
TATTCGTATCGTAAAGCTCTGTCCTATGGGAAGATAATGACGGTACCTTACTAAGAAGCT  
CCGGCTAAATACGTG

>3534 len=135 tot-seq=2

TGGGGAATATTGCGCAATGGGGGAAACCCTGACGCAGCGACGCCGCGTGAGTGAAGAAGT  
ATCTCGGTATGTAAAGCTCTATCAGCAGGGAAGAAAGTGGCGGTACCTGAGTAAGAAGCC  
CCGGCTAACTACGTG

>3535 len=135 tot-seq=2

TGGGGAATATTGCGCAATGGGGGAAACCCTGACGCAGCGACGCCGCGTGCGGGATGAAGT  
ATCTCGGTATGTAAACTTCTATCAGCAGGGAAGATAGTGACGGTACCTGACTAAGAAGCC  
CCGGCTAACTACGTG

>3536 len=135 tot-seq=2

TGGGGGATATTGCACAATGGGGGAAACCCTGATGCAGCAACGCCGCGTGGGTGAAGGAGT  
ACCCCGGTACGTAAAGCCCTATCGGCAGGGAAGAAGATGACGGTACCTGACTAAGAAGCC  
CCGGCTAACTACGTG

>3537 len=135 tot-seq=2

TGGGGAATATTGCACAATGGGGGAAACCCTGATGCAGCAACGCCGCGTGGGTGAAGAAGT  
ATTTCCGGTATGTAAAGCCCTATCAGCAGGGAAGAAAATGACGGTACCTGACTAAAAAGCC  
CCGGCTAAATACGTG

>3538 len=135 tot-seq=2

TGGGGAATATTGCACAATGGAGGAAACTCTGACGCAGCAACGCCGCGTGAGTGATGAAGG  
TCTTCGGATCGTAAAGCTCTTTGATTGGGGACGATAATGACGGTACCCAAAGAACAAGCC  
ACGGCTAACTACGTG

>3539 len=135 tot-seq=2

CAGGGAATCTTGCAGCAATGGGCGAAAGCCTGACGCAGCAACGCCGCGTGGGGGATGACGG  
CCTTCGGGTTGTAAACCCTTTTCAGGAGGGAAGAAATTGACGGTACCTCCAGAAGAAGCC

CCGGCCAACACTACGTG

>3540 len=135 tot-seq=2

TGGGGAATCTTGACACAATGGGGGAAACCCTGATGCAGCGACGCCGCGTGAGCGATGAAGC  
CCTTCGGGGTGTAAAGCTCTTTCGGCAGGGAAGATGATGACGGTACCTGCAGAAGCAGCT  
GCGGCTAACTACGTG

>3541 len=135 tot-seq=2

TGGGGGATATTGCACAATGGGCGCAAGCCTGATGCAGCGACGCCGCGTGTGGGAAGACGG  
CCCTCGGGTTGTAAACCACTGGCTTTGGGGACGATAATGACGGTACCCAAGGAGGAAGCT  
CCGGCTAACTACGTG

>3542 len=135 tot-seq=2

TGGGGGATATTGCACAATGGAGGAAACTCTGATGCAGCAACGCCGCGTGAGGGAAGAAGG  
TTTTCGGATTGTAAACCTCTGTCTCGGTGAAGATAATGACGGTAGCCGAGGAGGAAGCC  
ACGGCTAACTACGTG

>3543 len=135 tot-seq=2

TGGGGAATATTGCACAATGGGGGAAACCCTGATGCAGCGACGCCGCGTGAGCGAAGAAGG  
CTTTCGAGTCGTAAAGCTCTGTCTATGAGAAAAAATGACGGTACCAACAGAAGAAGTG  
ACGGCTAAATACGTG

>3544 len=136 tot-seq=2

GCACCAAACAAGTGAAGACCGGATAGGCTGACAGACCTCATCAAGTTTCAGTTTCCCCTT  
CCCAAACCCATATCTCATTGGGGGAACTGAGGCACAGTTGTGACCCACATGAGTAGGTCT  
GGATCTATTCCCAAT

>3545 len=136 tot-seq=2

TGGGGAATTTTGGACAATGGGCGCAAGCCTGATCCAGCGACGCCGCGTGAAGGAAGAAGT  
ATCTCGGTATGTAACTTCTATCAGCAGGGAAGAAAGAGGACGGTACCTGACTAAGAAGC  
CCCGGCTAACTACGTG

>3546 len=136 tot-seq=2

TGGGGAATATTGCGCAATGGGCACAAGCCTGATGCAGCAACGCCGCGTGAAGGAAGACGG  
TTTTCGGATTGTAACTTCTGTTCTTAGTGAAGAATAATGACGGTAGCTAAGGAGCAAGC  
CACGGCTAACTACGTG

>3547 len=136 tot-seq=2

ACTGATAAGCAACTTGCATCATACCAACTGGCCATTGAAGATTATTTTTCGAGTAAAATA  
CAGCCTTCCTTTAGAACCTCTACCCAGAAAGCAGTAACATCAATAATCTATAAAGTAGCA  
CTCATTCTTGCCACCA

>3548 len=136 tot-seq=2

TGGGGAATATTGCGCAATGGGGGAAACCCTGACGCAGCGACGCCGCGTGCGGGATGAAGG  
CCTTCGGGTTCGTAAACCGCTTTCAGCAGGGAAGAGAGAAGACTGTACCTGCAGAAGAAGC  
CCCGGCTAACTACGTG

>3549 len=136 tot-seq=2

TGGGGAATATTGCACAATGGAGGGAACTCTGATGCAGCGACGCCGCGTGCGGGACGGAGG  
CCTTCGGGTTCGTAAACCGCTTTCAGCAGGGAAGAGAGAAGACTGTACCTGCAGAAGAAGC  
CCCGGCTAACTACGTG

>3550 len=136 tot-seq=2

GCACGCAAGTTATCCACTCAGGACCTGGGGATGTAGTGATGAAAAATAACAATACAGGAC  
TCTTTCGAGGCCCTGTAATTGGAATGAGTCCACTTTAAATCCTTTAACGAGGATCCATTG  
GAGGGCAAGTCTAGTG

>3551 len=136 tot-seq=2

TGGGGAATATTGCACAATGGGGGAAACCCTGATGCAGCGACGCCGCGTGGGTGAAGAAGT  
ATTTCCGGTATGTAAAGCCCTATCGGTAGGGAAGAAGCAAGACGGTACCTGACTAAGAAGC  
CCCGGCTAACTACGTG

>3552 len=136 tot-seq=2

TGGGGAATATTGCACAATGGGGGAAACCCTGATGCAGCGACGCCGCGTGAGTGAAGAAGT  
AATTCGTTATGTAAAGCTCTATCAGCAAGGAAGAAAAAAGACGGTACTTGACTAAGAAGC  
CCCGGCTAAATACGTG

>3553 len=136 tot-seq=2

TGGGGAATATTACCACTCCCGACCCGGGGAGGTAGTGACGAAAAATAACAATACAGGAC  
TCTTTCGAGGCCCTGTAATTGGAATGAGTCCACTTTAAATCCTTTGACGAGGATCCATTG  
GAGGGCAAGTCTGGTG

>3554 len=136 tot-seq=2

TGGGGGATATTGCACAATGGGGGGAACCCTGATGCAGCGACGCCGCGTGCAGGAAGAAGG  
TTTTCGGATTGTAAACTGCTTTAGACAGGGGAAGAAACAAGACAGTACCTGTAGAATAAGC  
TCCGGCTAACTACGTG

>3555 len=136 tot-seq=2

TGGGGAATATTGCGCAATGGGGGCAACCCTGACGCAGCAACGCCGCGTGATTGAAGAAGG  
CCTTCGGGTTGTAAAGATCTTTAATCAGGGACGAATTTTGACGGTACCTGAAGAATAAGC  
TCCGGCTAACTACGTG

>3556 len=136 tot-seq=2

TGGGGAATTTTGCACAATGGGGGAAACCCTGACGCAGCAACGCCGCGTGGAGGATGACAC  
TTTTCGGAGCGTAAACTCCTTTTATCAGGAAAGAATAATGACGGTACCTGATGAATAAGC  
ACCGGCTAACTCCGTG

>3557 len=136 tot-seq=2

TGGGGGATATTGGACAATGGGGGAAACCCTGATGCAGCGACGCCGCGTGAAGGAAGAAGT  
ATCTCGGTATGTAAACTTCTATCAGCAGGGAAAGAAAGCAGACGGTACCTGACTAAGAAGC  
CCCGGCTAACTACGTG

>3558 len=136 tot-seq=2

TGGGGGATATTGCACAATGGAGGGAACTCTGATGCAGCGACGCCGCGTGAGGGAAGAAGG  
TTTTCGGATTGTAAACCTCTGTCTTCGGTGACGAAACGAGACGGTAGCCGAGGAGGAAGC  
CACGGCTAACTACGTG

>3559 len=136 tot-seq=2

TGGGGAATATTGCACAATGGGCGGAAGCCTGATGCAGCAACGCCGCGTGAGCGATGAAGG  
TCTTCGGATCGTAAAGCTCTGTCCTCAAGGAAGAATTTTGACGGTACTTGAGGAGGAAGC  
CCCGGCTAACTACGTG

>3560 len=136 tot-seq=2

CTGGGGAATATTGCACAATGGGGGGAACCCTGATGCAGCGACGCCGCGTGGGTGAAGGAG  
CACCTCGGTGCGTAAAGCCCTATCGGCAGGGAAAGAACAGACGGTACCTGACTAAGAAGC  
CCCGGCTAACTACGTG

>3561 len=136 tot-seq=2

TGGGGAATCTTGCACAATGGGCGAAAGCCTGATGCAGCGACGCCGCGTGCGGGACGGAGG

CCTTCGGGTCGTAAACCGCTTTCAGCAGGGAAGAGTCAAGACTGTACCTGCAGAAGAAGC  
CCCGGCTAACTACGTG

>3562 len=136 tot-seq=2

TGGGGAATATTGCACAATGGGCGAAAGCCTGATGCAGCAACGCCGCGTGAAGGAAGAAGG  
CTTTCGAGTCGTAAACTTCTGTCCAAAGGGAAGAATAATGACGGTACCTTTGAAGAAAGC  
CCCGGCTAACTACGTG

>3563 len=136 tot-seq=2

TAGGGAATATTGCTCAATGGGGGAAACCCTGAAGCAGCAACGCCGCGTGGAGGATGACGC  
TTTTCGGAGCGTAAACTCCTTTTCTGGGAAAGAATTATGACGGTACCCAAGGAATAAGC  
ACCGGCTAACTCCGTG

>3564 len=136 tot-seq=2

AAGTCTGATGGAGCAACGCCGCGTGAGTGAAGAAGGGTTTCGGCTCGTAAAGCTCTGTTG  
GTGGTGAAGAAGGATACGGGTAGTAACTGGCCTTTGTTTGACGGTAATCACTTAGAAAGT  
CACGGCTAACTACGTG

>3565 len=136 tot-seq=2

GAACTGAGGCCCTTGCCAAAAGTCATTGGATTGAGCCATCTTGAAGCAGATCTTCTATC  
CCTAATCAACACTTCAGATGACTGCAGCCCTGGAGGCCAGATTAAGTCAACCTCAAGAA  
AGTCCCTAAGCCAGGA

>3566 len=136 tot-seq=2

TGGGGAATCTTGACAATGGACGAAAGTCTGATGCAGCAATTCGCGTGAAGGATGAAGC  
ATTACGGTGTGTAACCTTCTTTTTTGGAGGAAGACGAATGACGGTACTTCAAGAATAAGA  
GACGGCTAACTACGTG

>3567 len=136 tot-seq=2

GGGATGGAGAACTCTGGGAAAGGTGGGATTACATTGCAGCATCGGCAGAGTACTAAGGAT  
TGCCGTGGTCTCCAGAAGGCCAAGGTCGTGCGTCTGCCATCAGTTCTTCACGCAGTCCG  
ACAGTGCTGTGTGGAG

>3568 len=136 tot-seq=2

ACTGGATTGGGATCTACGCTGGGCCACCCACTAGCAGGCGTTTGGCCAAGGGGCCTCAGT  
GGCCTCCTCTGTGCAGAAGGGGAGGAGACTGGGACCCCTCCCCTGTGACCTCGCTGGGGA

GCAGATTGCGGAGCAG

>3569 len=136 tot-seq=2

TGGGGAATTTTTCGCAATGGGGGAAACCCTGACGCAGCAACGCCGCGTGCGGGATGAAGG  
CCTTCGGGTCGTAAACCGCTTTCAGCAGGGAAGAACATCGACGGTACCTGCAGAAGAAGC  
CCCGGCTGACTACGTG

>3570 len=136 tot-seq=2

AAGTCTGATGGAGCAACGCCGCGTGAGTGAAGAAGGTTTTCGGATCGTAAAGCTCTGTTG  
TTGGTGAAGAAGGAGAAAGGGAGTAACTGGCCATTATTTGACGGTAAACCAACCAGAAAGT  
CACGGCTAACTACGTG

>3571 len=136 tot-seq=2

TGGGGAATATTGTGCAATGGGGGAAACCCTGACACAGCGACGCCGCGTGAGTGAAGAAGG  
CCTTCGGGTCGTAAAGCTCAATAGTATGGGAAGAAAGAAATGACGGTACCATACGAAAGC  
CCCGGCTAACTACGTG

>3572 len=136 tot-seq=2

TTGGGGGAGAGGAGGCATAAGACCTGGAAATCCAGGAAACATGGAGGGCACTTGCAGATG  
GTCGATCTGCCAGGGGACCTTCCCGCAAGCATGGAAGTCTGTGTCCCCACGCCAGGTTG  
AGTCACCGCCGGCTCC

>3573 len=136 tot-seq=2

CGAGGAATCTTCTACAATGGGCGCAAGCCCGATAGAGCAACGCCGCGTGGAGGACGACGG  
CCTTCGGGTTGTAAACTCCTTTCGGGGGGGATGAGAACGGACAGTACCCCCAGAAGCAGC  
CCCGGCTAACTCTGTG

>3574 len=136 tot-seq=2

TCGGGAATATTGCGCAATGGAGGGAACTCTGACGCAGTGACGCCGCGTATAGGAAGAAGG  
TTTTCGGATTGTAAACTATTGTCATTAGGGAAGAAAAAAGACAGTACCTAAGAAGGAAGC  
TCCGGCTAACTACGTG

>3575 len=137 tot-seq=2

GTTAATCTGAGTTCAAGGACAGCATGATCTACAGTGTGACTTCCAGGACAGCCAAGGATA  
CAAGAGAACTATCTAGAAACACCAAATAATAATAATAATAATAATAGTAATTTAAATGCT  
ATACAAAGTAGCACTTC

>3576 len=137 tot-seq=2

TGATGACTGTTGTTATTTGAACCCAGACCCACTGCCCTTCTCTTTATCCCAGACAGCCTT  
TCCTGTTTGTGTATAAAGAGTAACATTTTGATAAATATATTGAGAAAAGTACAGGATGGTC  
CCCATGAAAGTATCTAC

>3577 len=137 tot-seq=2

TGGGGAATTTTCCGCGGTGGGCGAAAGCCTGACGGGGCAATGCCACGTGGAGGTGGAAGG  
CCTACAGGTCGTCAACTTCTTTTCTCGGAGAAGAAACAATGACGGTATCTGAGGAATAAG  
CATCAGCTATCTCTGTG

>3578 len=137 tot-seq=2

TAGGGAATCTCCACGATGGGCGAAAGCCTGATGGAGCAATACCATGTGAACGAAGAAGG  
TCTTTTGTATTGTAAAGTTCTTTTATGAGGGATAACGACTGATAGTACCTCATGAATAAG  
TGACAGCAAACCTATGTG

>3579 len=137 tot-seq=2

TGAGGAATTTTCCGCAATGGGCGAAAGCCTGACGGAGCAATGCCGCGTGAAGGATGAAGG  
CCTATGGGTTGTAAACTTCTTTTCTTAGAGAAGAAATTTGACGGTATCTAAGGAATAAG  
CATCGGCTAACCTGTG

>3580 len=137 tot-seq=2

TGGGGAATATTGGGCGATGGGGGAAACCCTGACCCAGCAACGCCGCGTGGAGGAAGAAGG  
TTTTCGGATTGTAAACTCCTGTCTTGGTGAAGAGAAAGAGACGGTAGCCAAGGAGGAAG  
CCCCGGCTAACTACGTG

>3581 len=137 tot-seq=2

TGGGGAATTTTCCGCAATGGGCGAAAGCCTGACGGAGCAATGCCGCGTGGAGGTAGAAGG  
CCCACGGGTTGTGAACTTCTTTTCTCGGAGAAGAAACAATGACGGTATCTGAGGAATAAG  
CATCGGCTAATTCTGTG

>3582 len=137 tot-seq=2

TGGGGAATATTGCACAATGGGCGAAAGCCTGATGCAGCGACGCCGCGTGAGTGAGGAAGT  
ATTTGGTATGTAAAGCTCTATCAGCAGGGAAGAAAGAAATGACGGTACCTGAGTAAGAA  
GCTCCGGCTAAATACGT

>3583 len=137 tot-seq=2

TGGGGAATATTGCGCAATGGGGGAAACCCTGACGCAGCAACGCCGCGTGAAGGATGAAGG  
TCTTCGGATTGTAACTTTTGTCTTATGGGAAGAAGAAAGTGACGGTACCATAGGAGGAA  
GCCACGGCTAACTACGT

>3584 len=137 tot-seq=2

TGGGGAATATTGGGCGATGGGCGAAAGCCTGACCCAGCGACGCCGCGTGAGGGAAGAAGG  
TCTTCGGATTGTAAACCTTTGTAGACAGGGACGAAGAAATGACGGTACCTGTAAAGTAAG  
CCACGGCTAACTACGTG

>3585 len=137 tot-seq=2

TGGGGAATATTGGGCAATGGGCGCAAGCCTGACCCAGCAATGCCGCGTGAGCGATGAAGG  
TAGTTTTATTGTAAAGCTCTTTCTCAGGAACGAACAAATGACGGTACCTGAGGAATAAG  
CCCCGGCTAACTACGTG

>3586 len=137 tot-seq=2

TGGGGAATATTGCACAATGGGGGAAACCCTGATGCAGCGACGCCGCGTGAAGGAAGAAGG  
TATTCGTATTGTAACTTCTGTCGAGATGACGAAAGAATGACGGTAATCTGCAAGAAAG  
CACCGGCTAACTACGTG

>3587 len=137 tot-seq=2

ACCCAGTAGCTCAGAGATAGAAAAGCCACTGGCATTTCAGGAGTGCAGAAGGCCAGGCC  
TGCTCAGAGCAGAAGGTTCACTGGGAAGGTTAGTGTGTGACATGGTCAGAGAAGTCACAG  
AGGATCTAGGAATAATC

>3588 len=137 tot-seq=2

TGGGTGAGATGAGCTGAACAGCTCATCTTTGAGAGCATGGGATAAAGTTTTTTTCCTTC  
TTGGAAGATTTGAAGAAGTGAACAACAGGAAGGCCATGGTCTCTGTTCTCTGCCCATAG  
TTACACAAGCTATGCTG

>3589 len=137 tot-seq=2

TGGGGGATATTGCGCAATGGGGGAAACCCTGACGCAGCAACGCCGCGTGAAGGAAGAAGG  
TCTTCGGATTGTAACTTTTGTCTTGTGGGACGAATCAATGACGGTACCACAGGAGGAAG  
CCACGGCTAACTACGTG

>3590 len=138 tot-seq=2

TGGGGGATATTGGTCAATGGAGGAAACTCTGAACCAGCAACGCCGCGTGAATGATGAAGG



TCTTCGGATTGTAAAGTTCTTTTCTAAGGGAAGAAGATAGTGACGGTACTTTAGGAATAA  
GCCTCGGCTAACTACGTG

>3591 len=138 tot-seq=2

TGGGGAATATTGGGCAATGGGCGCAAGCCTGACCCAGCAGCGCCGCGTGAGGGAAGAAGG  
CTTTCGGGTTGTAAACCTCTGTCCTTGGTGGCGAAGGAAGTGACGGTAGCCAAGGAGGAA  
GCCCCGGCTAACTACGTG

>3592 len=138 tot-seq=2

TAGGGAATCTTCGGCAATGGACGGAAGTCTGACCCAGCAATTCTGTGTGCACGATGAAGT  
TTTTCGGAATGTAAAGTGCTTTCAGTTGGGAAGAAGAAAGTGACGGTACCAACAGAAGAA  
GTGACGGCTAAATACGTG

>3593 len=138 tot-seq=2

TGGGGAATATTGCACAATGGGCGAAAGCCTGATGCAGCAACGCCGCGTGAGCGAAGAAGG  
CTTTCGGGTCGTAAAGCTCTGTCCTTGGGGAAGAAAAAATGACGGTACCCTTGGAGGAA  
GCCCCGGCTAACTACGTG

>3594 len=138 tot-seq=2

TAGGGAATCTTCCACAATGGACGCAAGTCTGACGCAGCAACGCCGCGTGATTGAAGAAGG  
CCTTCGGGTTGTAAAGATCTTTAATCAGGGACGAAACAAATGACGGTACCTGAAGAATAA  
GCTCCGGCTAACTACGTG

>3595 len=138 tot-seq=2

TGGGGAATATTGCGCAATGGGGGCAACCCTGACGCAGCAACGCCGCGTGATTGAAGAAGG  
TCTTCGGATTGTAAAATCTTCAATTAGGGACGAAACAAATGACGGTACCTAAAGAATAA  
GCTCCGGCTAACTACGTG

>3596 len=138 tot-seq=2

ACAATAGCAGAGAGTGTACAGATTATAGCGGCACAAATGGTGAGCCACAGACGCTGAAG  
AGCAGGTTCTGGGGAAGGGAAAGGAGGAGAGGAGTCAGGAGACGGCTAAGTTCCACACAT  
TATGGGCCTGTGAGTACC

>3597 len=138 tot-seq=2

TGGGGAATATTGGGCAATGGGCGCAAGCCTGACCCAGCAACGCCGCGTGAAGGAAGAAGG  
CTCTCGGTTGTAAACTTCTTTTGGAGAGGGACGAAGTAAGTGACGGTACCTCTTGAATAA

GCCACGGCTAACTACGTG

>3598 len=138 tot-seq=2

TGGGGGATATTGCGCAATGGGGGCAACCCTGACGCAGCAACGCCGCGTGAAGGAAGAAGG

CCTTCGGGTTGTAACTTCTGTCTTTAGGGAAGAAGAAAGTGACGGTACCTAAGGAGGAA

GCCACGGCTAACTACGTG

>3599 len=138 tot-seq=2

TGGGGAATATTGGGCAATGGGCGAAAGCCTGACCCAGCGACGCCGCGTGAGGGAAGACGG

CCTTCGGGTTGTAAACCTCTGTTGCAGGGGAAGAAGGAAGTGACGGTACCCTGCGAGGAA

GCTCCGGCAAACCTACGTG

>3600 len=138 tot-seq=2

TCGGGAATATTGCGCAATGGAGGAAACTCTGACGCAGTGACGCCGCGTGACAGGAAGAAGG

TTTTCGGATTGTAACTGCTTTTAACAGGAAAGAAAAAATGACGGTACCTGTTGAATAA

GCTCCGGCTAACTACGTG

>3601 len=138 tot-seq=2

TGGGGAATATTGCACAATGGGGGGGACCCTGATGCAGCGACGCCGCGTGGGTGAAGGAGT

ATTTCCGGTATGTAAAGCTCTATCAGCAGGGAAGAAAGAAATGACGGTACCTGACTAAGAA

GCCCCGGCTAACTACGTG

>3602 len=138 tot-seq=2

TGGGGAATATTGGACAATGGAGGAAACTCTGATCCAGCAATTCTGTGTGTGTGAAGAAGG

TCTTCGGATTGTAAACACTTTTAGTTGGGAAGAAACAAATGACGGTACCAACAGAAGAA

GCGACGGCTAAATACGTG

>3603 len=138 tot-seq=2

TGGGGAATATTGCGCAATGGGGGAAACCCTGACGCAGCGACGCCGCGTGAGTGAAGAAGG

CTTTCGAGTCGTAAACTCTGTCTGATGGGAAGAAAAAATGACGGTACCATACAAGAAA

GCCCCGGCTAACTACGTG

>3604 len=138 tot-seq=2

TGGGGAATATTGGGCAATGGGGGAAACCCTGACCCAGCAACGCCGCGTGAAGGAAGAAGG

CTTTCGGGTTGTAACTTCTTTTACCGAGGACGAAGAAAGTGACGGTACTCGGAGAAAAA

GCCACGGCTAACTACGTG

>3605 len=138 tot-seq=2

TGGGGAATATTGCACAATGGGGGGAACCCTGATGCAGCAATGCCGCGTGAAGGATGAAGG  
TTTTCGGATTGTAACTTCTTTTGTACGGGACGAAGAAAGTGACGGTACCGTAAGAATAA  
GCCACGGCTAACTACGTG

>3606 len=138 tot-seq=2

TAGGGAATCTTCGGCAATGGGGGGAACCCTGATCCAGCGACGCCGCGTGAGTGAAGAAGT  
ATTTCCGGTATGTAAAGCTCTATCAGCAGGGAAGAAAGAAATGACGGTACCTGACCAAGAA  
GCCCCGGCTAACTACGTG

>3607 len=138 tot-seq=2

TAGGGAATCTTCGGCAATGGGGGGAACCTCTGATCCAGCAATTCTGTGTGTGTGAAGAAGG  
TTTTAGGACTGTAAACACTTTTAGTAGGGAAGAAAAAATGACGGTACCTACAGAAGAA  
GCAACGGCTAAATACGTG

>3608 len=138 tot-seq=2

TGGGGAATATTGCACAATGGGCGAAAGCCTGATGCAGCAACGCCGCGTGAACGAAGAAGG  
CTCTTGGGTCGTAAAGTTCTGTTCTGAGGGAAGAAGAAAGTGACGGTACCTCAGGAGAAA  
GCCCCGGCTAACTACGTG

>3609 len=138 tot-seq=2

TGGGGAATCTTCGCAATGGGCGAAAGCCTGACGGAGCAACGCCGCGTGAGTGAAGAAGG  
CTTTGAGTCGTAAACTCTGTCGTATGGGAAGAAAAAATGACGGTACCATACAAGAAA  
GCCCCGGCTAACTACGTG

>3610 len=138 tot-seq=2

TGGGGAATATTGCACAATGGGGGAAACCCTGATGCAGCGACGCCGCGTGAGTGAGGAAGT  
ATTTCCGGTATGTAAAGCTCTGTCAGCGGGGAAGAAAGAAATGACGGTACCCGACCAAGAA  
GCACCGGCTAAATACGTG

>3611 len=138 tot-seq=2

TGGGGAATATTGGGCAATGGGAGGAATCCTGACCCAGCGACGCCGCGTGAACGAAGACGG  
CCTTCGGGTTGTAAAGTTCTTTTATGTGGGAAGAATGAAGTGACGGTACCACATGAATAA  
GCCCCGGCTAACTACGTG

>3612 len=138 tot-seq=2

TCGGGAATATTGGACAATGGAGGAAACTCTGATCCAGTGACGCCGCGTGAAGGAAGAAGG  
TCTTCGGATTGTAACTTATTTTGTTCAGGGAAGAATAAAGTGAAGTACTGTACCTGAAGAAAAA  
GCACCGGCAAACACTACGTG

>3613 len=138 tot-seq=2

TGGGGAATATTGCACAATGGGGGAAACCCTGATGCAGCAACGCCGCGTGAAGGAAGAAGG  
CCTTCGGGTTGTAACTTCTTTTACCAGGGACGAAGGACGTGACGGTACCTGGAGAAAAA  
GCAACGGCTAACTACGTG

>3614 len=138 tot-seq=2

TGGGGAATATTGGGCAATGGGCGGAAGCCTGACCCAGCAACGCCGCGTGAAGGAAGAAGG  
CTTTTGGGTTGTAACTTCTTTTCTAAGGGACGAAGAAAGTGAAGTACCTTAGGAATAA  
GCCACGGCTAACTACGTG

>3615 len=138 tot-seq=2

GGTGGGGGATATTGCACAATGGGGGGAACCCTGATGCAGCAACGCCGCGTGAGGGGAAGAA  
GGTTTTCGGATTGTAACTTCTGTCTTAGGGAAGAGAGAGGACGGTACCTAAGGAGGAA  
GCTCCGGCTAACTACGTG

>3616 len=138 tot-seq=2

TGGGGAATATTGGGCAATGGGCGAAAGCCTGACCCAGCAACGCCGCGTGAAGGAAGAAGG  
CCTTCGGGTTGTAACTTCTTTTACCAGGGACGAACACAAAGACGGTACCTGGAGAAAAA  
GCAACGGCTAACTACGTG

>3617 len=138 tot-seq=2

TGGGGAATATTGGGCAATGGGCGAAAGCCTGACCCAGCGACGCCGCGTGAGGGGAAGAAGG  
TCTTCGGATTGTAACTTTGTAAAGCAGGAAAGAAGAAAGTAACGGTACCTGCAAAGTAA  
GCCACGGCTAACTACGTG

>3618 len=138 tot-seq=2

TGGGGAATATTGGGCAATGGGCGAAAGCCTGACCCAGCAACGCCGCGTGAGTGATGAAGG  
CCTTCGGGTTGTAAACTCTTTGGACAGGGACGAAAAAATGACGGTACCTACAGAAGAA  
GCAACGGCTAAATACGTG

>3619 len=138 tot-seq=2

TGGGGAATCTTGACAATGGGCGAAAGCCTGATGCAGCGACGCCGCGTGAGTGATGAAGG

CCTTCGGGTTGTAAACTCTTTGGACAGGGACGAAGAAAGTGACGGTACCTGTAGAACAA  
GCCACGGCTAACTACGTG

>3620 len=138 tot-seq=2

TGGGGAATATTGCACAATGGGCGAAAGCCTGATGCAGCAACGCCGCGTGAAGGATGAAGG  
TCCTTGGATTGTAAACTTCTGTCCATAGGGAAGAAACAAATGACGGTACCTATGGAGGAA  
GCCCCGGCTAACTACGTG

>3621 len=138 tot-seq=2

CTCCAGGCACTGGGACCTTGCCATGCAGGTGAGCTTTCCTGTTGCTGTTGCAAGAAAATG  
TTCCAAAGAGCTAAGAGAGACGTGTAGAGGACATCTAAGCTGCCTGGTAAACAGTCAGTG  
GCAGATTTCTAACTGAAC

>3622 len=138 tot-seq=2

TGGGGAATATTGCACAATGGGGGGAACCCTGATGCAGCGACGCCGCGTGAAGGAAGAAGT  
ATCTCGGTATGTAAAGCCCTATCAGCAGGGAAGAAAGAAATGACGGTACCTGACTAAGAA  
GCCCCGGCTAACTACGTG

>3623 len=138 tot-seq=2

TGGGGAATATTGGGCAATGGGCGCAAGCCTGACCCAGCAACGCCGCGTGAAGGAAGGAGG  
CTTTCGGGTTGTAAACTTCTTTAAGAGGGACGAAAGAAATGACGGTACCTCTTGAATAA  
GCCACGGCTAACTACGTG

>3624 len=138 tot-seq=2

TGGGGAATATCGGGCAATGGGCGAAAGCCTGACCCAGCAACGCCGCGTGAGGGAAGAAGG  
TTTTCGGATTGTAAACCTCTGTCCTAAGTGACGAAGGAAGTGACGGTAGCTTAGGAGGAA  
GCCCCGGCTAACTACGTG

>3625 len=138 tot-seq=2

TGGGGAATATTGCACAATGGGGGAAACCCTGATGCAGCAACGCCGCGTGAAGGAAGAAGG  
GTTTCGGCTCGTAAACTTCTATCAATAGGGATGAAAAAATGACAGTACCTAAATAAGAA  
GCCCCGGCTAACTACGTG

>3626 len=138 tot-seq=2

TGGGGAATATTGGGCAATGGGCGAAAGCCTGACCCAGCGACGCCGCGTGACGGAAGAAGG  
TCTTCGGATTGTAAACTGCTGTTGTAAGGGAAGAAGAAAGTGACGGTACCTTACGAGGAA

GCCACGGCTAACTACGTG

>3627 len=138 tot-seq=2

TGGGGAATATTGCACAATGGGGGGAACCCTGATGCAGCAACGCCGCGTGAAGGAAGAAGT  
AATTCGTTATGTAACTTCTATCAACGGGGAAGAAAGAGATGACGGTACCCGAGTAAGAA  
GCCCCGGCTAATTACGTG

>3628 len=139 tot-seq=2

GGGCCTGTGCCAAGACAGAGAGGGGCAGGAGAGCCCCAGCCAGCTTGACTIONGGGTGGCTC  
CACAGGCCAGCCCTGTGCTCAGCAGGTGGGCGCCACAAGGCCACTTCCTGCCACCCACAT  
CACTTTAGAGTGTGAGCAC

>3629 len=139 tot-seq=2

CGCAAGCCTGATGGAGCAACGCCGCGTGAGTGAAGAAGGGTTTCGGCTCGTAAAGCTCTG  
TTGTTGAAAAGAACGAGAGTGGGAGTAACTGTTACGCAGTGACGGTATCCAACCAGAA  
AGTCACGGCTAACTACGTG

>3630 len=139 tot-seq=2

AATCACTTGAACCCGGGAGGCAGAGTTGCAGTGAGCTGATATCGCACCACTGCTCTCCA  
GCCTGGGCAACAGAGTGAGACATAGTCTCAAAAAAAAAAAGAACATGAATTGGATCACATC  
ATTCGCCCACTGAACATCT

>3631 len=139 tot-seq=2

TAGGGAATCTCCACAATGGACGCAAGTCTGATGGAGCAACGCCGCGTGAGTGAACTCTA  
TTGTTGGTGAAGAAGGATAGAGGTAGTAACTGGCCTTTATTTGACGGTAATCAACCAGAA  
AGTCACGGCTAACTACGTG

>3632 len=139 tot-seq=2

TGGGGAATATTGCGCAATGGAGAAGAACTCTGACGCAGCAATACCGCGTGAGCGAAGAAG  
GTCTTCGGATCGTAAAGCTCTGTTATCAGGGAAGAAGAAAATGACGGTACCTGATGAGGA  
AGTCCCGGCTAACTACGTG

>3633 len=139 tot-seq=2

GCCTGGGACGACACAGGTAGGCTCAGGTGCCCTTGGCTACTCAGAATTGTGGGCAGGGT  
CCTGCTGGCATCTGGAGCCCCCAGCATCAAGAGGGTCTTACTCCCACCTTCAGGCCTCCT  
TCCCATCCCCACCCTCAG

>3634 len=140 tot-seq=2

GTCAGGGTGAATGTGTAGTGTCCACCAGGGGCTAAATTCCTTATTTGATTGCAGCAGTTC  
TAGTCTGAGCCATTCATGGATACTGAGGCCCTTCCAAGCCTTTAGTTAAAAAAGGTTCTG  
AATACTCAGAGAGTAAAGCA

>3635 len=140 tot-seq=2

TGGGGAATATTGCACAATGGGCGCAAGCCTGATGCAGCGACGCCGCGGGGGATGAAGG  
CCTTCGGGTTGTAAACCCCTTTCAGCAGGGAAGAAGCGAAAGTGACGGTACCTGCAGAAG  
AAGCGCCGGCTAACTACATG

>3636 len=140 tot-seq=2

TGGGGAATATTGCGCAATGGGCGAAAGCCTGACGCAGCAATGCCGCGTGCGGGATGACGG  
CCTTCGGGTTGTAAACCGCTTTCAGCCATGACGAAGCGAAAGTGACGGTAATGGAAGAAG  
AAGCACCGGCCAACTACGTG

>3637 len=140 tot-seq=2

TGGGGAATATTGCACAATGGGCGAAAGCCTGATGCAGCGACGCCGCGTGCGGGATGAAGG  
CCTTCGGGTTGTAAACCGCTTTCAGCGGGAGCAAGCGAGAGTGAGTGTACCCGTCGAAT  
AAGCACCGGCTAACTACGTG

>3638 len=140 tot-seq=2

TGGGGAATATTGCACAATGGGCGAAAGCCTGATGCAGCGACGCCGCGTGAGGGATGACGG  
CCTTCGGGTTGTAAACCTCTTTCACCAGGGACGAAGCTAACGTGACGGTACCTGGAGAAG  
AAGCACCGGCTAACTACGTG

>3639 len=140 tot-seq=2

TGGGGAATATTGCACAATGGGCGCAAGCCTGATGCAGCGACGCCGCGTGAGGGATGAAGG  
CCTTCGGGTTGTAAACCTCTTTCGTCAGGGAAGAAGCGAAAGTGACGGTACCTGAAGAAG  
AAGCACCGGCTAACTACGTG

>3640 len=140 tot-seq=2

TAGGGAATCTTCGGCAATGGACGAAAGTCTGACCGAGCAACGCCGCGTGAGGGATGGAGG  
CCTTCGGGTTGTAAACCTCTTTATCGGGGAGCAAGCGAGAGTGAGTTTACCCGTTGAAT  
AAGCACCGGCTAACTACGTG

>3641 len=140 tot-seq=2

CTGGGCTGAGTGGTGGTGGGCCCTACATGTACACCCGTGGCAGAGAGCTGGAGCACTGG  
GACGAGATGCTCAGCAAGCCCAAGGAGCTGGTGAAGCGCTGGCATGCGCTCTGCCGCACC  
ACGGAGCCCTGACCCTTCGC

>3642 len=140 tot-seq=2

GTTGAGCCCAAGACAGGCTGTAGTCCCAAGAGCAGAAATTGCCTGTGAACAGTCACTG  
TCATTCACTACAGAAGCATTTTACAAATGCTTTTTTTTTTTCATACAAGCCATAGTCCCC  
ACATAGCTATATTAGAAACC

>3643 len=140 tot-seq=2

CCTGCGGTACATCTGCTCGCCCTGCGGGTGCCGTCCATCCTTGAGGGTCTGCACGTCGTT  
GAAGAGCAGCCGGATCATGCTATCCGCCTTGCCAAGTCCCGTTCCACCTCCCCGCCCCG  
CTGTGGCACTTTGCCTGCAG

>3644 len=140 tot-seq=2

GAGAGCGTTGCAGAAATTCAGGATACCGATCATCAGCATCACGCTCCCCACAAAAACGG  
GATCATATACTGGTGAAAGACAGCATTATGAAAATCCACTGATAGGTGGTAAAGGATGT  
CACCGTGA CTCCCGTCCCCT

>3645 len=140 tot-seq=2

GTGCTCTGCTGGAGCTCTCCAGTGGTCAGGCATGGTCTGCTGGAGAAGGAACTATGATGA  
AGGTCCCCAGAAAGTGCCCCAGTTGGGCAAGTGAGGCTACGTTGCAAGTAGGCATGGCCA  
GGCTGGGGCACCAAAGAGG

>3646 len=141 tot-seq=2

TGGGGAATATTGGACAATGGGGGCAACCCTGATCCAGCCATGCCGCGTGGGGGAATGAAG  
GTCTTCGGATTGTAACCCCTGTCATGTGGGAGCAAATTA AAAAGATAGTACCACAAGAG  
GAAGAGACGGCTAACTCTGTG

>3647 len=141 tot-seq=2

GGGAATATTGCGCAATGGGGGAAACCCTGACGCAGCGACGCCGCGTGCGGGATGAAGGAA  
TTAGGGTTGTA AAAAGAGGGGGATTGGGAGAAAGAATTTGGGTGAGTGTACCTTCGAA  
TAAGCGCCGGCTAACTACGTG

>3648 len=141 tot-seq=2

TGGGGAATATTGCGCAATGGGGGAAACCCTGACGCAGCGACGCCGCGTGCGGGATGAAGG



CCTTCGGGTTGTAACTCCTTCGCTAGGGACGAAGCTTTTTGTGACGGTACCTAGATAA  
GAAGCACCGGCTAACTACGTG

>3649 len=141 tot-seq=2

TGGGAATATTGCACAATGGGCGGAAGCCTGATGCAGCGACGCCGCGTGAGGGATGACGG  
CCTTCGGGTTGTAACTCCTTCAGTAGGGAAGAAGCTTTTTGTGACGGTACCTGCAGAA  
GAAGCGCCGGCTAACTATGTG

>3650 len=141 tot-seq=2

GGGAATATTGCGCAATGGGGGAACCCCTGACGCAGCGACGCCGAGTGAGGGATGAAGGAA  
TTAGGGTTGTAAAAAGATTTTGATTGGGAGAAAGAATTTGGGTGAGTGTACCTTCGAA  
TAAGCGCCGGCTAACTACGTG

>3651 len=141 tot-seq=2

CGAAAGTCTGACGGAGCAACGCCGCGTGAGTGTGAAGGGTTTCGGCTCGTAAAGCTCTG  
TTGTTAGGGAAGAAACAGTACCGAACGAAGTACCGTACCTTGACGGTACCTAACCAG  
AAAGCCACGGCTAACTACGTG

>3652 len=141 tot-seq=2

TGAGGAATATTGGTCAATGGGCGAGAGCCTGAACCAGCCAAGTAGCGTGCAGGATGACGG  
CCCTATGGGTTGTAACTGCTTTTATATGGGAATAAAGTGAGGGACGTGTCCCTTCGAA  
TAAGCGCCGGCTAACTACGTG

>3653 len=141 tot-seq=2

CTGAAAATCTCAATTCAGTTAGCTGGAGTCTATGCTGCACATAGTTCAGGGCTTAGCCAG  
AGAGATGGATAGAATTTATGCACAGAATTTGTGGTGCTTTTTCTTGGCTCTCTTTCTTC  
TGAGATTTCCCCCTCATTTT

>3654 len=141 tot-seq=2

GGATAACCCATTCTTGAGAGGAGATTTGCTATAAAATGGAGCAGATAAGTGGTGTAGTAG  
CTGGAGGGGTCACAGAGTCAAGAAAGAATTTTTCAAATAGAAGAGGTATTACAACCTGT  
TGATATGTTGATCTAAACGAT

>3655 len=141 tot-seq=2

TAGGAATCTCCACAATGGACGAAAGTCTGATGGTGCGACGCCGCGTGGGGGAATGAAG  
GTCTTCGGATTGTAAACCCCTGTCATGTGGGAGCAAATTAAGAAGATAGTACCACAAGAG

GAAGAGACGGCTAACTCTGTG

>3656 len=141 tot-seq=2

TGAGGAATATTGGTCAATGGGAGAGATCCTGATGGTGGCAGCGCCGCGTGGGGGAATGAAG

GTCTTCGGATTGTAAACCCCTGTCATGTGGGAGCAAATTA AAAAGATAGTACCACAAGAG

GAAGAGACGGCTAACTCTGTG

>3657 len=141 tot-seq=2

GGGGGTGGAGTGAAGCCCAGGAAACAGCCCAGGTGAAGGGAGCTGGCGCTCCAGACTGAA

TGCAGTTTCCTAAGATCCACTGGCGTCGTGTATGCAAATGAGAAGGGCTTCCCGGAGCTG

CCCTGAGCCAGGCGCCTTCTG

>3658 len=141 tot-seq=2

TGCAGGATCTTCGGCAATGGGGGCAACCCTGACCGAGCGATGCCGCGTGAGCGATGAAGG

CCTTCGGGTTGTAAAGCTCGAAAGTGGGGAGAAACGCCGAAAGGCTTGATCTATCCACAG

TAAGCTCGGGCTAAGTTCGTG

>3659 len=142 tot-seq=2

GCAAGCACCCGCCCCACAAGGTCAGAGATGGTGGCCAAAGGGACCGAGGTAGAAGAGCC

TCTGGGGTCTGTTTTAGTCTAGGGGACTTCTGGGGCGTGATGGGTGGGGTTAGCAACAC

ACCCTTCCTTAGGACCTGGGCC

>3660 len=142 tot-seq=2

TAGGGAATCTTCGGCAATGGGGGCAACCCTGACCGAGCAACGCCGCGTGAGTGAAGAAGG

TTTTCGGGTTGTAAACCGCTTTCAGCAGGGACGAGGCCGCAAGGTGACGGTACCTGCAGA

AGAAGCCCCGGCTAACTACGTG

>3661 len=142 tot-seq=2

TGGGGAATTTTGGACAATGGGGGCAACCCTGATCCAGCCATGCCGCGTGCAGGATGAAGG

TCTTCGGATTGTAAACTGCTTTCAGCAGGGACGAGGCCGCAAGGTGACGGTACCTGCAGA

AGAAGCCCCGGCTAACTACGTG

>3662 len=142 tot-seq=2

ATCGGAGGTTATCAGGCATGGTGGCCCCGAGAGACCTGCAGCTCAGCCCCTCAGGAACA

AAGGGAGGTGGTGAAAACACGGACTGTACAGTTATCCTACGTCAGGGATGAAGGATGGA

TCTGGGCCTTCTACGGCAACTC

>3663 len=142 tot-seq=2

GGGGAAGGGTCTGTCAAAAGGATTGCAGAAAATACGTGATGACCCGAAAAGAGGGAGTGT  
TGATCTTTTATAGGAACCAACAATACATATCCAGAAGGCCAGCGAACTCTGAAGCTTGC  
GAGCTGAGTTCCTTTGTGCTGA

>3664 len=142 tot-seq=2

TGAGGAATATTGGTCAATGGGGGGAACCCTGACCGAGCAACGCCGCGTGAACGAAGAAGT  
TATTCGTAATGTAAAGTTCTTTTATCAGGGAAGAAAGAGGAATTTGACGGTACCTGAGGA  
ATAAGCTCCGGCTAACTACGTG

>3665 len=142 tot-seq=2

TAGGGAATCTTCGGCAATGGGGGGAACCCTGACCGAGCAACGCCGCGTGAGTGAAGAAGG  
TTTTCGGGTTGTAAACCGCTTTTGATCGGGAGCAAGCCTTCGGGTGAGTGTACCTTTCGA  
ATAAGCACCGGCTAACTACGTG

>3666 len=142 tot-seq=2

TGAGGAATATTGGTCAATGGGCGAGAGCCTGAACCAGCCAAGTAGCGTGCGGGATGACGG  
CCTTCGGGTTGTAAACCGCTTTTGATCGGGAGCAAGCCTTCGGGTGAGTGTACCTTTCGA  
ATAAGCACCGGCTAACTACGTG

>3667 len=142 tot-seq=2

TGGGGAATATTGCACAATGGGCGCAAGCCTGATGCAGCGACGCCGCGTGAGGGATGACGG  
CCTTCGGGTTGTAAACCTCTTTGCCAGGGACGAAGGGTGATACTGACGGTACCTGGAGA  
AGAAGCACCGGCTAACTACGTG

>3668 len=142 tot-seq=2

TGGGGAATATTGCACAATGGGCGCAAGCCTGATGCAGCAACGCCGCGTGAGCGATGAAGG  
TCTTCGGGTCGTAAACCGCTTTTGATTGGGAGCAAGCCTTCGGGTGAGTGTACCTTTCGA  
ATAAGCGCCGGCTAACTACGTG

>3669 len=142 tot-seq=2

TGGGGAATATTGCGCAATGGGCGAAAGCCTGATGCAGCGGCGCCGCGTGCGGGATGAGGG  
CCTTCGGGTTGTAAACCGCTTTTCAAGCAGGGACGAGGCCGCAAGGTGACGGTACCTGCAGA  
AGAAGCCCCGGCTAACTACGTG

>3670 len=142 tot-seq=2

TGAGGAATATTCCACAATGGGCGAAAGCCTGATGGAGCAATGCCGCGTGCAGGATGAGGG  
CCCTCGGGTTGTAAACCGCTTTTGATTGGGAGCAAGCCTTCGGGTGAGTGTACCTTTCGA  
ATAAGCGCCGGCTAACTACGTG

>3671 len=142 tot-seq=2

TGAGAACTCCGGGAGTCACAGAGGAGAAGGGGAGAGACAGGGAGGCAGCACAGAGGAGAA  
GGGGAGAGACAGGGAGGCAGTGGTGAGAACTCCAGGAGCCACAGCCCACCCAGAAATGT  
GGGGTGTGAGATGAGCCTGGGG

>3672 len=142 tot-seq=2

TGAGGAATATTCCACAATGGGCGTAAGCCTGATGGAGCAATGCCGCGTGCGGGATGAAGG  
CCTTCGGGTTGTAAACCGCTTTTGATTGGGAGCAAGCTTCGGGTGAGTGTACCTTTCGA  
ATAAGCGCCGGCTAACTACGTG

>3673 len=142 tot-seq=2

TAGGGAATATTCCACAATGAGCGAAAGCTTGATGGAGCGACGCCGCGTGCGGGATGAAGG  
CCTTCGGGTTGTAAACCGCTTTTGATTGGGAGCAAGCTTCGGGTGAGTGTACCTTTCGA  
ATAAGCGCCGGCTAACTACGTG

>3674 len=142 tot-seq=2

TGGGGAATATTGGACAATGGAGGCAACTCTGATCCAGCAATTCTGCGTGCGGGATGAAGG  
CCTTCGGGTTGTAAACCGCTTTTGATTGGGAGCAAGCTTCGGGTGAGTGTACCTTTCGA  
ATAAGCGCCGGCTAACTACGTG

>3675 len=142 tot-seq=2

TGGGGAATATTGGGCAATGGGCGAAAGCCTGACCCAGCAACGCCGCGTGAGTGATGAAGG  
CCTTTGGGTTGTAAACCGCTTTTGATTGGGAGCAAGCTTCGGGTGAGTGTACCTTTCGA  
ATAAGCGCCGGCTAACTACGTG

>3676 len=142 tot-seq=2

TGGGGAATATTGGGCAATGGACGCAAGTCTGACCCAGCAACGCCGCGTGAAGGAAGAAGG  
CTTTCGGGTTGTAAACCGCTTTTGATTGGGAGCAAGCCTTCGGGTGAGTGTACCTTTCGA  
ATAAGCGCCGGCTAACTACGTG

>3677 len=142 tot-seq=2

TGGGGAATTTTGGACAATGGGCGCAAGCCTGATCCAGCAATGCCGCGTGCGGGAAGAAGG

CCTTCGGGTTGTAAACCGCTTTTGATTGGGAGCAAGCCTTCGGGTGAGTGTACCTTTCGA  
ATAAGCGCCGGCTAACTACGTG

>3678 len=142 tot-seq=2

TGGGGAATATTGCACAATGGACGGAAGTTCGATGCAGCGACGCCGCGTGGAGGGTGTAGG  
CCTTCGGGTTGTAAACCGCTTTCAGCAGGGACGAGGCCGCAAGGTGACGGTACCTGCAGA  
AGAAGCCCCGGCTAACTACGTG

>3679 len=142 tot-seq=2

TGGGGAATCTTCGCAATGGGCGCAAGCCTGACGGAGCAATGCCGCGTGGAGGGATGAAGG  
CCTTCGGGTTGTAAACCGCTTTCAGCAGGGACGAGGCCGCAAGGTGACGGTACCTGCAGA  
AGAAGCCCCGGCTAACTACGTG

>3680 len=142 tot-seq=2

GGACGAAAGTCTGATGGAGCAACGCCGCGTGAGTGAAGAAGGGTTTCGGCTCGGAAAGCT  
CTGTTGTTAGTGAAGAAAGATAGAGGTAGTAACTGGCCTTTAGGTGACGGTAATTACTTA  
GAAAGTCACGGCTAACTACGTG

>3681 len=142 tot-seq=2

TAGGGAATTTTCGGCAATGGGGGGAACCCCTGACCGAGCAACGCCGCGTGAACGAAGAAGT  
ATTCGGTATGTAAAGTTCCTTTATTGGTGAAGAAAGAGGAATTTGACGGTAGCCAATGA  
ATAAGCTCCGGCTAACTACGTG

>3682 len=143 tot-seq=2

CAGTTTCCAAGAAGTTGATGGTCACCCCCAAAGTAGCAGAAGCTGGAGTTCAAGGGAAGG  
TCCTCGTGACCTCTTATTGGGAGAGATGCCATAGATACTGACGATGTTGTAAACAGACAA  
GACAAACTACAACATTAATAATAC

>3683 len=143 tot-seq=2

TCCATGTATGATGAGATAAGTATTTTCTTCTGTAAGGTGTTTAGTAGCTCAGGTGGAAGA  
GTGTTTGCCTAGCTTGGCAGACCTAGGACTGATCCTCCGCACAGCATAAACCAGATGTG  
CTGATGCACATTTGTAATGAATA

>3684 len=143 tot-seq=2

CCCATCCGTA CTCCAGCATGGTCGGGAGCATAAGGCTGCACCCCTAAGCGGAGGAGCTCC  
TGGTGAGTGAGGGCTGTCGGGAGAGGAAGTTTATTTTTCTCTAGGGGTACAGGTATGGAA

AGTCACCCACACTCATGCACATC

>3685 len=143 tot-seq=2

TGGGGAATATTGCACAATGGAGGAACTCTGATGCAGCAACGCCGCGTGAATGATGAAGG  
CCTTCGGGTTGTAAACCGCTTTTGATTGGGAGCAAGCCTTTTGGGTGAGTGTACCTTTTCG  
ATAAAGCGCCGGCTAACTACGTG

>3686 len=143 tot-seq=2

TGGGGAATATTGCGCAATGGACGAAAGTCTGACGGAGCAACGCCGCGTGAGTGATGACGG  
TCTTCGGATTGTAAACCGCTTTTGATTGGGAGCAAGCCTTTTGGGTGAGTGTACCTTTTCG  
ATAAAGCGCCGGCTAACTACGTG

>3687 len=143 tot-seq=2

TGAGGAATATTGGTCAATGGGCGCTAGCCTGAACCAGCCAAGTAGCGTGCAGGATGACGG  
CCCTATGGGTTGTAAACCGCTTTTGATTGGGAGCAAGCTTTCGGGTGAGTGTACCTTTTCG  
ATAAAGCGCCGGCTAACTACGTG

>3688 len=143 tot-seq=2

TGAGGAATATTGGTCAATGGACGCAAGTCTGAACCAGCCAAGTAGCGTGCAGGATGACGG  
CCCTATGGGTTGTAAACTGCTTTTATATGGGAGCAAGCTTTCGGGTGAGTGTACCTTTTCG  
ATAAAGCGCCGGCTAACTACGTG

>3689 len=143 tot-seq=2

GGGGGAAACCCTGACGCAGCGACGCCGCGTGCGGGATGAAGGCCTTCGGGTTGTAAAGTT  
CTGTTATGCGGGGCGAATGGTACGACGGTCAATACCCGTCGTAAGTGACGGTACCGTAAG  
AGAAAGCCACGGCTAACTACGTG

>3690 len=143 tot-seq=2

CCCCAGCAGCAGCTCCAGCAGCAGCAGCCCCAGCAGCAGCCCCAGCAGCAGCCCCAG  
CAGCAGCCACAGCAGCAGCAGCCCCAGCAGCAGCAGCTCCACCAGCAGCCCCAGTAGCAG  
CTCTAGCAGCAGCAGCAGCAGCC

>3691 len=143 tot-seq=2

TGGGGAATATTGACAATGGAGGAACTCTGATCCAGCAATTCTGTGTGTGGGATGAAGG  
CCTTCGGGTTGTAAACCGCTTTTGATTGGGAGCAAGCCTTTTGGGTGAGTGTACCTTTTCG  
ATAAAGCGCCGGCTAACTACGTG

>3692 len=144 tot-seq=2

ACACCTGGGAAGAGGCCGAGAAGGTCTGGTTGCAAGATACCACCACCACCTCAGAGGAT  
GTTATGTTGTGTGCATCAAGTGCATATCTGAAGCTCACGTCTGTCTTGTGTGCACACTGT  
CCTCCATGCAAAGCAGCCGCAGAC

>3693 len=144 tot-seq=2

CCTGGGTGTTTCCCAAAGACCTGACTTTCTTATCTAACAGAAGAGCGATTGACAAAAGGC  
AAAGAAGGCAGGGTGAGCTCTTGGTACACAGGGGACTTGGGGGAGAAGCTAGGCCTTGTG  
CTGTGTGGGCAGAAGCTGTGAGGG

>3694 len=144 tot-seq=2

TAGGGAATTTTTACAATGGGCGCAAGCCTTATGAAGCAATGCCGCGTGAACGATGAAGG  
TCTTATAGATTGTAAAGTTCTTTTATATGGGAGCAAGCCTTTTGGGTGAGTGTACCTTTC  
GAATAAGCGCCGGCTAACTACGTG

>3695 len=144 tot-seq=2

TGGACGAAAGGCGGACGGAGCAACGCCGCGTGAGGGATGACGGGCGTCGGATTGGAAAGC  
TCTGTTAATCGGGACGAATGGTCCGGTGTGCAAATAGTGCATGGACATGACGGTACCGGAA  
TAGAAAGCCACGGCTAACTACGTG

>3696 len=144 tot-seq=2

CCGCATATACCTATGAAGCCATTGAAGGAGAGGGGCCGATTCCTGGCCAGAAAACCC  
CCATTGTCATGGCATACTGGGAGCCGCAATGCAGACACCGCTTACGGAAGTCCGGATT  
TTAATCTTCAGGTTATCGGATTCC

>3697 len=145 tot-seq=2

AGGTCTTTTAGGGCAGGACGATAACAATCAAAACAGTATGTAAGGGCCTGCCACGCAAGC  
ACACACATGCTCATTGCCCTGGGAGGCTCCCAAAGCTGGGGTGAAGTGGGGCTTTGTCA  
CAAATACGCCTTTCCTTTCCTCA

>3698 len=145 tot-seq=2

GCGGTTTGATGTGGTTTCAGTGAGGGGTGGTTATAGGAGCTATGGCAGGAGATGGGGTCA  
GAAAGGTGGGCAGGGACCTGGTATTCCGTGCCAAGAAACAGGGACAGGGAGACATGGCCC  
AAGCCTCGGGAGTGAGGGTATAGAA

>3699 len=145 tot-seq=2

GCAAGAGGCAGGGAGAAGGAAAATCAGAGGGAGAGGAGGGGAAGGAGGAGCCTGGAAAGA  
GAGGGAAAGGGAGTGGGAGGGGAGCTGAGAAAGGGGAGGTGGGGAGAGGCCAGGGAGCAG  
AGGGAGAGAGGAGAAGAGGGGGCAG

>3700 len=145 tot-seq=2

CTGTAAAGACATCAACACTCTTTCAAACGATGGAGCACAAAGCCTGAGAACAGCTGATT  
CACCAGATTGACACACCTTGCTTTCAAGTTCTGTGGCTCATTCTTTGTAACACTTCACA  
TCAAATTTTCTCTCTCCAACCTATC

>3701 len=146 tot-seq=2

CAATGGACAAAAGTCTGATGTAGCAACGCCGCTGAGTGAAGAAGGTTTTCGGATAGTAA  
AGCTCTGTTGTTGGTGAAGAAGGATAGAGGTAGTAAATGGAATTTATTTGACGGTAATCA  
ACCAGAAAGTCACGGCTAACTACGTG

>3702 len=146 tot-seq=2

CAATGGACGCAAGTCTGATGGAGCAACGCCGCTGAGTGAAGAAGGGTTTCGGCTCGTAA  
AGCTCTGTTGGTAGTGAAGAAAGATAGAGGTAGTAACTGTTTCATTGATGACGGTATCTA  
ACCAGCAAGTCACGGCTAACTACGTG

>3703 len=146 tot-seq=2

CAATGGACGCAAGTCTGATGGAGCAACGCCGCTGAGTGAAGAAGGTTTTCGGCTCGTAA  
AGCTCTGTTGTTGGTGAAGAAGGACAGAGGTAGTAACTGACCCTTGTGTTGACGGTAATCA  
ACCAGAAAGTCACGGCTAACTACGTG

>3704 len=146 tot-seq=2

CAATGGACGCAAGTCTGATGGAGCAACGTCGCTGAGTGAAGAAGGGTTTCGGCTCGTAA  
AGCTCTGTTGTTGGTGAAGAAAGACAGAGGTAGTAACCGACCTTGTGTTGACGGTAATTA  
ATTAGAAAGTCACGGCTAACTACGTG

>3705 len=146 tot-seq=2

CTCCCTGCTGAGCCTGTGAACAGTAGGAGGCCAGGGCCTGGGTGTGGCAGCTTCTGTG  
TCTGGGCTTTCCAAGCTCCAGCTTGCTGGCCCTCTTCTGATGGAGGACCTGTTGAGG  
GAGCACTGCTCCCCTGACCGGAATGA

>3706 len=146 tot-seq=2

GGGGATGGAGTGGGAAGGTGGTCTTCCCCTGGAGTTGGGCCGCTCAGCTGCCGGGCTCTC



AGCTGAATCCCCTTGGCGTCCATGTCATCGACAGCCTACTGACATCTGTCAGTGTGTTCC  
TTCTCCCCGTGTGTTCTCTCGATGT

>3707 len=146 tot-seq=2

TGAGGAATTTTTACAATGGACGAAAGCCTGACGGAGCAACGCCGCGTGAGTGATGAAGG  
TCTTCGGATCGTAAACTCTGTTATTAGGGAAGAACATATGTGTAAGTAACTGTGCACAT  
CTTGACGGTACCTAATCAGAAAGCCA

>3708 len=146 tot-seq=2

CTTGCCCTGCAGGAGTAAAGCCATCTTGAAGTAAAACAATCATAATGACTAATATTTGAC  
TCCTGCATACCAAGGTATTCTGCAGCAAGGTCAAAAACAATGTATGTAGCATGAATAACC  
CCTCATAAAATTGCTTATCTAACTTC

>3709 len=146 tot-seq=2

GAGGGGAGACATCACAGAGAGCGTGCCTAGAGGTGGGGAAATGAGAAGGGAATTGGAGGC  
AGAGTGCAGAAGGAGGAAGGAACAGAAGGCTAAGTGGCTTTTGGGTTCCCCTCATCCCAA  
AATGTCCTCTCAGGGTCAGCCAGGAG

>3710 len=146 tot-seq=2

CCAGAAACAGCCTGAGAAGGAAGCTCCTCTGTCTCCACCGCATCTCTGGTCGGTCCCTGT  
GGCTCTGCTCCTGCCTCCTCACTTCCCCACCATCCTTCCTTCACTTTCTCGGATTCAGA  
ATTTGTGGGAGAAGTTTGACGGGTCA

>3711 len=146 tot-seq=2

ACACGGTGGGAGTGGAGTGGAGCAGGCTGTGCAGAGAATGTCTCTTTGGAGAGGAGCTTG  
GAGCTTGGATCTGGCCTGCCAAGTATCTTGAGGTGGAACATGTCAGCAGAGGGAACAGCA  
GTGCCGGTCTCTAAGGTGGTAATGAT

>3712 len=147 tot-seq=2

TAGTCTTTGTCTTAATATCTCCAGTGAGGATTGTAGCTGGGGACGGCACAGACACATTC  
CAGCTCCCACACGCAGGAGCTACCCGAGAAACGGCCAGATTAGACGCTGAAGGGCTTGAT  
CATCAGTCTACATGATTGCTATGTTGG

>3713 len=147 tot-seq=2

CCTATTGAGTTGGGGAAGAGACAGGAGCCATGGGGAATGCTGTAAGGGCTGTGGGGACCC  
AGCAGACTAGAAGAGGGAGTTGAATGTCAGCTACTTGAAGAAAGGTCCACAGTGCTGGCG

CTGAGGCCCCGGGAGACCTGAAAGAGA

>3714 len=147 tot-seq=2

GACCTTAAGTTCTATGTGGACCACATTCTGGATACTCAAAGATGTGGTGACAGACAAGAA  
AATGAAGGCATTTAGACACTTGAGCCTGGTGACTAAATTAGAAGTTAACTGTGGCATG  
GACAAGCACTGGTTTTTCTAAGATCCT

>3715 len=147 tot-seq=2

TAGGGAATAGGCCACAATGGAAGAAAGTCTGATGGAGAAACGCCGCGGGAGTGAAGAAGG  
TTTTCGGATAGTAAAGCTCTGTTGTTGGTGAAGAAGGATAGAGGTAGTAACTGGCCTTTA  
TTTGACGGCAATCAACCAGAAAGTCAC

>3716 len=147 tot-seq=2

TCAGGTAAATTGCCATTGGCCACTTCCCCAGTTGGACTTGGAGTAGCAGGGGAAGGTTTA  
GGAGTGCACAGCCTTTGAGGCAGGCAAGACATTTGTTTTTCATTCGAGGATCCAAAGATA  
GCTCCAGGGTGGGTAAGCATGTGATCC

>3717 len=147 tot-seq=2

TGGGGAATTTTGGACAATGGGGGAAACCCTGATCCAGCAACTCTGCGTGAGGGACGAAAA  
TCTTCGGATTGTAAACCTCTTTTGTATGGGAAGAAATCCCAGCAAGGGTGTGACGGTACCA  
TGCGAATAAGCCACGGCTAACTATGTG

>3718 len=147 tot-seq=2

TGGGAGACCATGAAAGCCAGGCTGGCCACCTTCACTTACCTTGGTTTGAACCTCATGTTGG  
AAGTGACAGTGGTGGCCGTGTGAGTGGTGCCCGTCTCGTGGGTCTCACAGGGGGGGTTGG  
AGCACACCCTCTGTGTTGGGAAAGGAG

>3719 len=147 tot-seq=2

ACAATGGACGAAAGTCTGATGGAGCAACGCCGCGTGAGTGAAGAAGGTTTTCGGCTCGTA  
AAGCTCTGTTGGTAGTGAAGAAAGATAGAGGGAGTAACTGGCCTTTATTCGACGGTAATT  
ACTTAGAAAGGCACGGCTAACTACGTG

>3720 len=148 tot-seq=2

GGGAGTTAGTGAAGTCTGTGGATACTCACACCCAGAGCACTGAATTCAAATGTTTTTAT  
ACCTGAGATGTAGCAATGAAGGTAATATCTGGTATGATAGATGTTTGTATACCCCTCTT  
TAGGTGTAATGGATCCTTTCTTGTTCT

>3721 len=148 tot-seq=2

GGGAGAGCCTGTCAGGAGAGGGGGGACATACCACGGCTGGAGGAGGCACTCTTCAGACCT  
AGATCCAAAGCAAACCATGCTTCCTGCTGCTCGGAGCACCCAACCAGCACCGAATCTTCA  
ATTCTTTGCGAATCCTGTCCGAACCTAC

>3722 len=148 tot-seq=2

TTTTTTTTTTGCTAAAAAACTTTTTTGTGGTTCCTTATCTTATTCTTCCATTTTTGTGAA  
TCAGAAAACCAAAGACAATCTTTGCTAGTGTCTACACAGGCAAGGAAGCCCAGAATCTCG  
AGGCTCTTCTGTGCGACCCACTTCAGTG

>3723 len=148 tot-seq=2

CTGAAGTCAGCCCTCCACCCCGAGAGTGAGTCAGAGCAGGCTCACCAGCTAGGAGATGT  
GCTCTGCTCATTACCAGTGAAAGCCTCCTTTGTCCCTCCTCCATAGGGAAGGACAATGT  
CGTGCCCTGGTTTCTTTGTGTTCAAGGG

>3724 len=148 tot-seq=2

CACAATGGACGCAAGTCTGATGGAGCAACGCCGCTGAGTGAAGAAGGGTTTCGGCTCGT  
AAAGCTCTGTTGGTGGCGAAGAAAGACAGAGGTAGTAACTGACCTTTATTTGACGGTAAT  
CAATTAGAAAGTCACGGCTAACTACGTG

>3725 len=148 tot-seq=2

CAGCAAGAAGAGGAGGACTTGCAGAAGCTGTCCCTGCAGCCCCCTACTATGATCTGGGG  
GTCTCCCCCTCTACCACCCCTCGGTAAGGACAACCGAACCTCGAGGAGAGTGCCCCTAG  
CCCAGGACCACCCAGCCTGGCCATGAGC

>3726 len=148 tot-seq=2

AAAAATGAGAGAAAGATTGATGGAGAGAAAAAGAGTGAAGATGAAGGTATTAGGATTGT  
AAAGTGATGTTATAAGGGAAGAAGATTTGGAATAGGAAATGATTGAAGACTGACGGTACC  
TTGTCAGAAAGCGATGGCTAACTATGTG

>3727 len=148 tot-seq=2

GAAGGACCCGCCAGGAAAGGGGGCGGCTGGAAGCAGCAGTGGGGAGAAGGCTGAGCGCAG  
CTTTGTGTGGATTATATTTTGTCTCTCAGATTCCCTTCCAGAGCGTCACTCCTGTTCCGA  
ACCTCAGTGCAAACCAGAAAGGGGCCCC

>3728 len=149 tot-seq=2

GGGCCAGCCCTTGGCAAATTGTTTCAGGTAATGAAGATGTCTCTGACATCTTTTAGTTCT  
TCTCCCTCATCCCCCTTCCAGGTCTGAGTTCTGAAGTTAGGAGGCTTCAGCGTCACACA  
ATGGGATGGTGGGACGTCCAGTTCCACAC

>3729 len=149 tot-seq=2

ACGGGAGGCAGCAGGGGGGAATATGGCAAAGGGGGGAAACCAGGAGGCAGCGACGACGA  
GGGAAGGAAGAAGGAGCTCGGTATGGAAAAGTCTAGCAGAAGGGAAGAGAGTGAAGGGAC  
CTGACTAAGAAGACCCGGCTAACTACGTG

>3730 len=149 tot-seq=2

AGCTGCAGCAGAGAGCAGGCAGAAGCAGCTAGGTGAACAGTGGGCTTAACTCTGGGGTGC  
TTGCCTGGCACCAGGCAGAGGGCTGGCTGGGAATGGCGGTTGTACTCACCACCACAGGGG  
GACACAAAATAGCCCAGGCAGTGTCAAGG

>3731 len=149 tot-seq=2

TAGGGAATCTTCCACTATGGGCGAAAGCCTGATGCAGCGACGCCGCGTGAGTGAAGAAGT  
ATTTCCGGTATGTAAAGCTCTATCAGCAGGGAAGAAAGGCTCGTAAGAGAGATGACGGTAC  
CTGACTAAGAAGCCCCGGCTAACTACGTG

>3732 len=149 tot-seq=2

CCGCAGCTGGACATGCCGCTGGTCTGGACCAGGGCCTGACCAGGCAGATGCGGCTACGC  
GTGGAGAGCCTGAAGCAGCGCGGGGAGAAGCGCCAGGATGGGGAGAAGCTGCTGCAGCCA  
GCGGAGTCTGCGTACCGCCTCAACTTCAC

>3733 len=149 tot-seq=2

GGAGGCTTGGTGGGTGGGGCAGCTAGCTTGAGTCTGCCCTGGCAGCGTCCCCTGCTGATC  
CTTGCTCCCCGTGCTCTGGCTAGGGAGGATCACCCCGACCTAATCCAGAATGCCAAGAAA  
TCGGACATCCCAGAGAAGCCCCAAAACCCC

>3734 len=149 tot-seq=2

GATATTCAGAGGCTGGGCTGGCAGTTCCCATCCCGTGGTCGCAGAGTGCTATGGAGGGGA  
GATAATAGGTGTGATTTCTGTGCAGAGGATGGACAGGGCTCCAGGGACAGAGGATGCAGG  
AGTGACAGGCATCATCAGATACCATTTGT

>3735 len=150 tot-seq=2

TCCACAATGGACGAAAGTCTGATGGAGCAACGCCGCGTGAGTGAAGAAGGTTTTCGGATC

GTAAAGCTCTGTTGTTGGTGAAGAAGGACGGGGGTAGTAACTGACCTTTGTTTGACGGTA  
ATCAATTAGAAGGTCACGGCTAACTACGTG

>3736 len=150 tot-seq=2

GGCAAGCCGCTCATAGCGCACAGAGGTCCAGCGGCCAGGGAGAAGCCAGTACTTGTA  
ACT  
ATGCTGGGCCCCGGGGTGGCGCTTCTTCCATCAGTGTCTGCTCCTGGGATTCGTGCAGGGA  
GTCCTGGTCCAGCAGGTCAAAGTGCAGTCC

>3737 len=151 tot-seq=2

ATATTGCACAATGGGGGAAACCCTGATGCAGCGACGCGTGAAGGAAGAAGGTTTTCGGAT  
TGTA  
AACTTCTGTTATAAAGGAAGAACGGCGCTACAGGAAATGGTAGCCGAGTGACGGT  
ACTTTATTAGAAAGCCACGGCTAACTACGTG

>3738 len=151 tot-seq=2

CAGGCAGGTGGTGAGTAGTCCGTGCCTCATGCTCTGAACTGGCACAAGGAAATGTGTTCA  
CAAAGTTTCTCAGCTCACAGCCCAGAAAGTACAGCCCCCTTCTCCTAAATTGCATCAGT  
AGAAGAGGATCTCTTGGGACGACTTGTGTGA

>3739 len=151 tot-seq=2

TTAAAAATGGACGCAAGTCTGATGGAGCAACGCCGCGTGAGTGAAGAAGGTTTTAGGAT  
AGTAAAGATATGTTGTTGGGGAAGAAGGAGAGAGGGAGGAAATGGAATTTATTTGAAGGT  
AATCAACCAGAAAGTACGGCTAACTACGTG

>3740 len=151 tot-seq=2

TGGGGAATATTGGACAATGGGCGGAAGCCTGATCCAGCAACGCCGCGTGAGGGATGACTG  
CCTTCGGGTTGTAAACCTCTTTCATCATTGACGAAGTCCAGCTTTTTGTTGGGTGACGGT  
AGGTGGAGAAGAAGCACCGGCAACTACGTG

>3741 len=151 tot-seq=2

CACAGCAGAAACCAAAGGTGAAATGCATATGAGAGAATCAAAGCCACGCACAGTTTTCT  
AAGTTATAGCTATCTCAGGTCAATCCCCAGTTTGAAGTCTCCCTTGCTTCTGAAGGGT  
TCAAAGTAGCTGAACACAACCTTTCCATTAC

>3742 len=152 tot-seq=2

TAGGGAATCTCCACAATGGACGAAAGTCTGATGGAGCGACGCCGCGTGAGTGAAGAAGT  
ATTCGGTACGTAAAGCTCTATCAGCAGGGAAGAAGAAAGTCTTTGGACTTTGGACGG

TACCTGACCAAGAAGCCCCGGCTAACTACGTG

>3743 len=152 tot-seq=2

TAGGGAATATTGCACAATGGGGGAAACCCTGATGCAGCAACGCCACGTGTGGGAAGAAGC

ATTCGGTGTGTAAACCACTGTCGTGAGGGAATAAGGCTGAGTTTCGGCTCAGTTGAATG

TACCTCGAGAGGAAGCACCGGCAAACCTTCGTG

>3744 len=152 tot-seq=2

GAGGACGGCACAGGAGAGGAAGGCCTGGGGAGATGAGGACCCGGCCTGGCTGGGAAGAGG

CCCCTGGAGGCTGAGGGAGACCAGGCCAGGCCATTGGGCCACGTCATGCGCAGACACCA

CCCCTGGCCTGGTAGGAGCCAGCATCTGGTTC

>3745 len=152 tot-seq=2

TGGGGAATTTTGCACAATGGACGCAAGCCTGATGCAGCGACGCCGCGTGAGGGATGAAGG

CCTTCGGGTTGTAAACCTTTTTCGCTCATGGTCAAGCCATACTGTTGGGTGTGGTGAGGG

TAGTGGGTAAAGAAGCGCCGGCTAACTACGTG

>3746 len=152 tot-seq=2

TGGGGAATATTGCACAATGAGCGCAAGCTTGATGCAGCGACGCCGCGTGAGGGTGTAGG

CCTTCGGGTTGTAACTCCTTTTGCCCGCGAAAAAGGCACGATTTTCGGTCGTGTTGATGG

TAGCGGGAGAAAAAGCACCCGGCTAACTACGTG

>3747 len=152 tot-seq=2

TGGGGAATATTGCGCAATGGGGGAAACCCTGACGCAGCGACGCCGCGTGCGGGATGAAGG

CCTTCGGGTTGTGAACTCCTTTTTCTCGCGAAAAAGGCACAGTTTTGGCTGTGTTGATGG

TAGTGGGGGAAGAAGCGCCGGCTAACTACGTG

>3748 len=152 tot-seq=2

TAGGGAATCTTCCACAATGGACGCAAGTCTGATGGAGCAACGCCGCGTGAGGGTGTAGG

CCTTCGGGTTGTGAACTCCTTTTTCTCGCGAAAAAGGCACAGTTTTGGCTGTGTTGATGG

TAGTGGGGGAAGAAGCGCCGGCTAACTACGTG

>3749 len=152 tot-seq=2

TGGGGAATATTGCACAATGGGGGAAACCCTGATGCAGCGACGCCGCGTGAGTGAAGAAGT

AATTCGTTATGTAAAGCTCTATCAGCAGGGAAGAAAAAGGCATACATGCCTAAATGACGG

TACCTGAATAAGAAGCCCCGGCTAACTACGTG

>3750 len=152 tot-seq=2

TGGGGAATATTGCACAATGGGCGCAAGCCTGATGCAGCGACGCCGCGTGAGGGATGGAGG  
CCTTCGGGTTGTGAACTCCTTTTTCTCGCGAAAAAGGCACAGTTTTGGCTGTGTTGATGG  
TAGTGGGGGAAGAAGCGCCGGCTAACTACGTG

>3751 len=152 tot-seq=2

TGGGGAATATTGCACAATGGACGGAAGTTTGATGCAGCGACGCCGCGTGAGGGTGTAGG  
CCTTCGGGTTGTGAACTCCTTTTTCTCGTGAAAAAGGCATGCTTTTGGGTGTGTTGACGG  
TACCTTACTAAGAAGCTCCGGCTAAATACGTG

>3752 len=152 tot-seq=2

TAGGGAATCTTCGGCAATGGACGGAAGTCTGACCGAGCAACGCCGCGTGAGTGAAGAAGG  
TTTTCGGATCGTAAAGCTCTGAAGAACGAGTGTGAGAGTGGAAGTTCACACTGTGACGG  
TATCTTACCGAAAGGGACGGCTAACTACGTG

>3753 len=152 tot-seq=2

CTACGTAACTTGGCCAAGTCTTGGCAGCACGAAATTTGCAAGGACCTGTGAGATATGG  
AGCCAGTAATGCTTTGCAGCTGACAGATGAAAGACAAACAATAAAAACAGAGGTGAGAGG  
GGAAGCCTGTAAGTCTTACCCCCACCAGTG

>3754 len=153 tot-seq=2

TTTTCCCTAAATGGCAGATTGGCATTGGAAGTTGATTAATTCGGTGGATAAGAAGCTTAA  
CGTGGTTTTAGAGCCAAAAGCAGTAAAAGTTTATTCGAACAAAAAATTTTTTAATGTG  
GTTCTGTTTTCCAAGCCTGTTTGTGCATCTTTG

>3755 len=153 tot-seq=2

ATTGGTCAGTGACTGGACTTCAGACGTGTGCTCTCCGATCTCCTACTGGAGGCAGCAGG  
GATGGCAGGGCAGAGGGAGGCAGGAGACTCTTTAGCTTTAGGAGGCAGTGGTAGGATCCT  
GGAGTGGAGGACGGTGCCTTGCCACAGTGGCAG

>3756 len=153 tot-seq=2

AGGAATATTGGTCAATGGACGCAAGTCTGAACCAGCCAAGTAGCGTGCAGGATGACGGCC  
CTATGGGTTGTAAAATGATTTTATATGGGGATAAAGTGGGGAAAGTGTTAACTTTTGCAG  
GTACCATATGAATAAGGACCGGCTAATTCCGTG

>3757 len=153 tot-seq=2

ATTCAAACAACAGAGGGGAAAGCCCTGGAGTCCTAAGTAACAGAAAACTTTCAGACCCTC  
ATATCAGTGTTCTGAAATTCCAAGTGAGGGGGAAACACTCAGAACCCAGCAGCTGTGTTT  
TGGAATCCATTGTGACGGACTTACAAGTGGACC

>3758 len=153 tot-seq=2

TGGGGAATATTGCGCAATGGGGGAAACCCTGACGCAGCAACGCCGCGTGAGGGATGAAGG  
CCTTCGGGTTGTAAACCTTTTTCGCTCATGGTCAAGCCGCAGCTTTGGGTTGTGGTGAGG  
GTAGTGGGTAAAGAAGCGCCGGCTAACTACGTG

>3759 len=153 tot-seq=2

CAGGTGGATCACCTGAGGTCAGGAGTTTGAGACCAGCCTGGCCAATAAGGTGAAAACCTCG  
TCTCTACTACTAAAAAAAATTAGCCAGGCATGGTGGCGGGTGCCTGTAATCCCAGCTA  
CTCAGGAGGCTGAGGCAGGATAATCCCTTGAAC

>3760 len=153 tot-seq=2

ATATATAGATAGAAATCCAAAAGTAGAGTGAAAGAATGGGAATATGGTAGAATCTGTTTT  
ATAGCTAAAAGTGCTATGTTTGTGACACATTAATTAGACACTCAATGGGGACTCCCAAGA  
TTGGAACAGTGGAGTTGAGCTTCCACAATCAAC

>3761 len=153 tot-seq=2

TTTATCTAGAACCTGCTTTAGCAACGTTTCCAAAGTCAGGAAGCAGGGATCTGCTGTGAG  
TTTATCTGGAATGTGAAGGAAGCAGGTGAAGACCAGCTTAATCTCTTGAAAATGGGGAGA  
GGGGGCCGGGCACGGTGGCTCACGCCTGAAATC

>3762 len=154 tot-seq=2

ATGCAAAGGTCTAAAGGGGGCTTCTCTAGCAGAGAGTTGGGAGAAAGTCCATTGTGGCTA  
GTACAATTAGGTGAAAGAGGCAGGTGGCAGAAAAGTCTGGAGAGAGAATCATCCCATCGG  
TGACCACAGAAGCAGGACACTGACCTACCTACTG

>3763 len=154 tot-seq=2

AATCATTAGCAGTCAGGCTGTGTGAATTTTTTGTGGTAAGAGAGATAAATGTCCCTCTT  
GTTCTTTGTGGTTTCCTTTGCCATAAGAGCCACTGCTTTGTGAAAGTTCTTCTTCTTT  
CTCTGGCTTGCCCATCCCTGGATTGATGTAGTAG

>3764 len=154 tot-seq=2

ATATTAATAAATGGAAGAAAGTATGATGGAGAAAAGAAGAGTGAATGAAGAAGGAATTAG



GGTAGTAAAATTATGTTGTAAGAGAAGAAAGTGAGTGAGAGTAACTGTTACGTATTGAC  
GGTATCTGACCAGAAAGCCACGGCTAACTACGTG

>3765 len=154 tot-seq=2

TGAGGAATATTGGTCAATGGACGAGAGTCTGAACCAGCCAAGTCGCGTGAAGGAAGACGG  
ATCTATGGTTTGTAACCTCCTTAGTGTGGGAACAAAGCGTGGTTGCGACCGCAGATGAG  
TGTACCACAAGAATAAGCATCGGCTAACTCCGTG

>3766 len=154 tot-seq=2

TGGGGAATATTGCACAATGGGGGGAACCCTGATGCAGCGACGCCGCGTGGGTGAGGAAGG  
CCTTCGGGTTGTAAAGTACTTTTCAGTCGGGAGGAAGGTGTCAAGGTTAATAACCTTGGCA  
ATTGACGTTACCGACAGAAGAAGCACCGGCTAAC

>3767 len=154 tot-seq=2

TGTAGTGCTATTTACTAAAATAACAGGTTTTATTGAGAATGACACGGTCCTTGCTCAAG  
AACAAACAGGAGTAACCAGAGAATGAGGGGAGATAAGTTAGCAATCAGTATTGATAAAGAA  
ACATTTGAGAAACACCCCAAACTGAAGTACTGA

>3768 len=155 tot-seq=2

TGAGGAATATTGGTCAATGGGCTAAGGCCTGAACCAGCCAAGTCGCGTGAGGGAAGACGG  
TCCTATGGATTGTAAACCTCTTTTGTCTGGGGAGCAACGAGGCCACGTGTGGCCGAAGTGA  
GAGTACCCGAAGAAAAAGCATCGGCTAACTCCGTG

>3769 len=155 tot-seq=2

GCTAAGATGTTTGGGAACCAGCTGCAAGCCACATAGATCATTTTCTTTGAATAGAGAGCA  
ATTGCACAGCGCCTGGAGTTGCTATCTTCTCTCCCATGTCAGCCAGGCTGGCTTGTCTG  
TCACAGAGCTGTTTGAGCTCAGAGTTCTCTCTTCA

>3770 len=155 tot-seq=2

TGAGGAATATTGGTCAATGGGCGGAGCCTGAACCAGCCAAGTAGCGTGAAGGATGAAGG  
CTCTATGGGTCGTAAACTTCTTTTATACGGGAATAAACGAATCCACGTGTGGATTTTTGC  
ATGTACCGTATGAATAAGGATCGGCTAACTCCGTG

>3771 len=155 tot-seq=2

TAGGGAATCTCCGCAATGGGCGTAAGCCTGAACCAGCCAAGTCGCGTGAGGGATGAAGG  
TTCTATGGATCGTAAACCTCTTTTATAAGGGAATAAAGTGCGGGACGTGTCCTGTTTTGT

ATGTACCTTATGAATAAGGATCGGCTAACTCCGTG

>3772 len=155 tot-seq=2

TGAGGAATATTGGTCAATGGACGAGAGTCTGAACCAGCCAAGTAGCGTGAAGGATGAAGG

TTCTATGGATTGTAACTTCTTTTATACGGGAATAAAGTTTTCCACGTGTGGAATTTTGT

ATGTACCATATGAATAAGGATCGGCTAACTCCGTG

>3773 len=155 tot-seq=2

TGAGGAATATTGGTCAATGGACGAGAGTCTGAACCAGTCAAGTAGCGTGAAGGATGAAGG

TTCTATGGATCGTAAACCTCTTTTATAAGGGAATAAAGTGCGGGACGTGTCCTGTTTTGT

ATGTACCTTATGAATAAGGATCGGCTAACTCCGTG

>3774 len=155 tot-seq=2

TAAGGAATATTGGTCAATGGAGGCAACTCTGAACCAGCCATGCCGCGTGAAGGATGAAGG

CCCTCTGGGTTGTAACTTCTTTTGTAAAGGAAGAAATACAGACATTCTTGTTTGTTTGA

CGGTACCTTAAGAATAAGCACCGGCTAACTCCGTG

>3775 len=155 tot-seq=2

TGGGAATTTTCCGCAATGGGCGATGGCCTGAACCAGCCAAGTAGCGTGAAGGATGACTG

CCCTATGGGTTGTAACTTCTTTTATAAAGGAATAAAGTCGGGTATGCATACCCGTTTGC

ATGTACTTTATGAATAAGGATCGGCTAACTCCGTG

>3776 len=155 tot-seq=2

TGAGGAATATTGGTCAATGGACGCAAGTCTGAACCAGCCATGCCGCGTGCAGGAAGAATG

TGCTATGCATTGTAACTGCTTTTGTACGAGGGTAATAACAGGTACGTGTACCTGGATGA

AAGTATCGTACGAATAAGGATCGGCTAACTCCGTG

>3777 len=155 tot-seq=2

TGGAGAATATTGCACAATGGGGGAGAGCCTGAACCAGCCAAGTAGCGTGAAGGATGACTG

CCCTATGGGTTGTAACTTCTTTTATAAAGGAATAAAGTCGGGTATGTATACCCGTTTGC

ATGTACTTTATGAATAAGGATCGGCTAACTCCGTG

>3778 len=155 tot-seq=2

TGAGGAATATTGGTCAATGGACGCAAGTCTGAACCAGCCATGCCGCGTGCAGGAAGACGG

CTCTATGAGTTGTAACTGCTTTTGTATGAGGGTAAAATTAGATACGTGTATCTAACTGC

AAGTATCATAACGAATAAGGATCGGCTAACTCCGTG

>3779 len=155 tot-seq=2

TAAGGAATATTGGTCAATGGAGGCAACTCTGAACCAGCCATGCCGCGTGCAGGAAGACTG  
CCCTATGGGTTGTAAACTGCTTTTATCCGGGAATAAACCTCTCTACGTGTAGGGAGCTGA  
ATGTACCGGAGGAATAAGGATCGGCTAACTCCGTG

>3780 len=155 tot-seq=2

TGAGGAATATTGGTCAATGGGCGAGAGCCTGAACCAGCCAAGTAGCGTGCAGGATGACGG  
CCCTATGGGTTGTAAACTGCTTTTATGCGGGGATAAAGTGTGCCATGTATGGTGTTTTGC  
AGGTACCGCATGAATAAGGACCGGCTAATTCCGTG

>3781 len=155 tot-seq=2

TAAGGAATATTGGTCAATGGGCGGAAGCCTGAACCAGCCATGCCGCGTGCAGGATGACTG  
CCCTACGGGTTGTAAACTGCTTTTGTCCAGGAATAAACCTTTCTACGTGTAGGAAGCTGA  
ATGAACTGGAAGAATAAGGATCGGCTAACTCCGTG

>3782 len=155 tot-seq=2

TGAGGAATATTGGACAATGGGTTAGCGCCTGATCCAGCCATCCCGCGTGAAGGACGACGG  
CCCTATGGGTTGTAAACTTCTTTTGTACAGGGATAAACCTATTTACGTGTAAATAGCTGA  
AGGTACTGTACGAATAAGCACCGGCTAACTCCGTG

>3783 len=155 tot-seq=2

TGAGGAATATTGGTCAATGGGCGTAAGCCTGAACCAGCCAAGTAGCGTGAAGGATGACGG  
CCCTACGGGTTGTAAACTTCTTTTGTGCGGGGAATAAACCGTCCCACGTGTGGGGCGCTGC  
ATGTACTCGGTGAATAAGGACCGGCTAATTCCGTG

>3784 len=155 tot-seq=2

TGAGGAATATTGGTCAATGGGCGAGAGCCTGAACCAGCCAAGTAGCGTGCAGGATGACGG  
CCCTATGGGTTGTAAACTGCTTTTATATGGGAATAAAGTGAGGCACGTGTGCCTTTTTGT  
ATGTACCGTATGAATAAGGATCGGCTAACTCCGTG

>3785 len=155 tot-seq=2

TGGGGAATATTGCACAATGGGCGAGAGTCTGAACCAGCCAAGTAGCGTGCAGGATGACGG  
CCCTATGGGTTGTAAACTGCTTTTATAAGGGAATAAAGTGAGTCTCGTGAGACTTTTTGC  
ATGTACCTTACGAATAAGGACCGGCTAATTCCGTG

>3786 len=155 tot-seq=2

TGAGGAATATTGGTCAATGGACGCAAGTCTGAACCAGCCACGTCGCGTGAAGGAAGACGG  
CCCTACGGGTTGTAAACTTCTTTTGTAAAGGGAATAAAGTGCAGTACGTGTACTGTTTTGC  
ATGTACCTTACGAATAAGGATCGGCTAACTCCGTG

>3787 len=155 tot-seq=2

TAGGGAATTTTCGGCAATGGGGGAAACCCTGACCGAGCAACGCCGCGTGAGTGATGAAAG  
TCTTCGGATTGTAAAGCTCTGTTGTAAAGGAGGAACGGCTTGAGGAGAACTCAAGAGTGA  
CGGTACCTTACCAGAAAGCCACGGCTAACTACGTG

>3788 len=155 tot-seq=2

TGAGGAATATTGGACAATGGGTGGAAGCCTGATCCAGCCATCCCGCGTGAAGGATGAAGG  
TTCTATGGATTGTAAACTTCTTTTATATAGGGATAAACCTATCCTCGTGAGGGTAGCTGA  
AGGTACTATATGAATAAGCACCGGCTAACTCCGTG

>3789 len=155 tot-seq=2

TGAGGAATATTGGTCAATGGACGCAAGTCTGAACCAGCCATGTCGCGTGAAGGATGACTG  
TCCTATGGATTGTAAACTTCTTTTATATGGGGATAAAGTGTGAGACTTGTCTCATTTC  
ATGTACCATATGAATAAGCATCGGCTAACTCCGTG

>3790 len=155 tot-seq=2

TGAGGAATATTGGTCAATGGGCGCAAGCCTGAACCAGCCATGCCGCGTGCAGGAAGACGG  
TCCTATGGATTGTAAACTGCTTTTATACAGGAAGAAACACCTCCACGTGTGGAGGCTTGA  
CGGTACTGTAGGAATAAGGATCGGCTAACTCCGTG

>3791 len=155 tot-seq=2

TGAGGAATATTGGTCAATGGGCGATAGCCTGAACCAGCCAAGTGCGCGTGAGGGAGGAAGG  
CTCTATGGGTCGTAAACCTCTTTTATAAGGGATTAAAGTTGGGGTCGTGACCCCGTTGGA  
AGGTACCTTATGAATAAGCATCGGCTAACTCCGTG

>3792 len=155 tot-seq=2

TGAGGAATATTGGTCAATGGAGGCAACTCTGAACCAGCCACGTCGCGTGAAGGATGACGG  
CCCTACGGGTTGTAAACTTCTTTTGTAAAGGGAATAAAGTTAGTTACGTGTA ACTATTTC  
ATGTACCTTACGAATAAGGATCGGCTAACTCCGTG

>3793 len=155 tot-seq=2

TAAGGAATATTGGTCAATGGACGGAAGTCTGAACCAGCCATGCCGCGTGCAGGATGACTG

CCCTATGGGTTGTAACTGCTTTTGTGCGAGGAATAAACCTATCTACGTGTAGATAGCTGA  
ATGTACTCGAAGAATAAGGATCGGCTAACTCCGTG

>3794 len=155 tot-seq=2

TGAGGAATATTGGTCAATGGACGAGAGTCTGAACCAGCCAAGTCGCGTGGGGGATGACGG  
TCCTACGGATTGTAACTCTTTAGGCGGGGAGTAATGTGCTCTACGAGTAGAGTAGTGA  
GAGTACCCGCAGAATAAGCATCGGCTAACTCCGTG

>3795 len=155 tot-seq=2

CGAGGAATATTGGTCAATGGGCGAGAGCCTGAACCGCCAAGTAGCGTGCAGGATGACGG  
CCCTATGGGTTGTAACTGCTTTTACGCGGGGATAAAGCGCGTGACGTGTCGCGCATCGC  
AGGTACCGCGTGAATAAGGACCGGCTAATTCCGTG

>3796 len=155 tot-seq=2

TGAGGAATATTGGGCAATGCCCGCAAGGGTGACCCAGCAACGCCGCGTGGAGGATGAATG  
CCGTAAGGTTGTAACTCCTGTTAGAGGGGAAGAATAATTCCGATCAAATCGGAACTTGA  
CTGTACCCTCAGAGAAAGCCCCGGCTAACTACGTG

>3797 len=155 tot-seq=2

TGGGGAATCTTCCGCAATGGACGAAAGTCTGACGGAGCAACGCCGCGTGAGTGATGACGG  
CCCTATGGGTTGTAACTGCTTTTATATGGGGATAAAGTGGGGAACGTGTTCCCTTTTGC  
AGGTACCATATGAATAAGGACCGGCTAATTCCGTG

>3798 len=155 tot-seq=2

TGAGGAATATTGGTCAATGGGCGAGAGCCTGAACCAGCCAAGTAGCGTGAAGGATGACTG  
CCCTATGGGTTGTAACTTCTTTTATATGGGAATAAAGTAGGCTATGTATAGCCTTTTGT  
ATGTACCATATGAATAAGGATCGGCTAACTCCGTG

>3799 len=155 tot-seq=2

TGAGGAATATTGGTCAATGGCCGAGAGGCTGAACCAGCCAAGTCGCGTGAGGGATGAAGG  
TTCTATGGATCGTAACTTCTTTTATATAAGAATAAAGTGCAGTATGTATACTGTTTTGT  
ATGTATTATATGAATAAGGATCGGCTAACTCCGTG

>3800 len=155 tot-seq=2

TGGGGAATATTGCACAATGGGCGCAAGCCTGAACCAGCCAAGTAGCGTGAAGGATGAAGG  
CTCTATGGGTCGTAACTTCTTTTATATAAGAATAAAGTGCAGTATGTATACTGTTTTGA

ATGTATTATATGAATAAGGATCGGCTAACTCCGTG

>3801 len=155 tot-seq=2

TGGGGAATATTGCGCAATGGGGGAAACCCTGACGCAGCGACGCCCGTGCGGGATGAAGG

CCCTATGGGTTGTAAACTGCTTTTATGCGGGGATAAAGGAGTCCACGTGTGGGCTTTTGC

AGGTACCGCATGAATAAGGACCGGCTAATTCCGTG

>3802 len=155 tot-seq=2

TGAGGAATATTGGTCAATGGGCGAGAGCCTGAACCAGCCAAGTCGCGTGAAGGAAGAATG

TCCTATGGATTGTAAACTTCTTTTGCAGGAGAATAAAGTGCACCACGTGTGGTGTTTTGT

ATGTACCCTGCGAATAAGGATCGGCTAACTCCGTG

>3803 len=155 tot-seq=2

TGAGGAATATTGGTCAATGGGCGAGAGCCTGAACCAGCCAAGTCGCGTGAGGGAAGACGG

TCCTACGGATTGTAAACCTCTTTTGTGCGGGGAGCAATAAGGCGTACGTGTACGCAGATGC

GAGTACCCGAAGAAAAAGCATCGGCTAACTCCGTG

>3804 len=155 tot-seq=2

TGAGGAATATTGGTCAATGGGCGAGAGCCTGAACCAGCCAAGTCGCGTGAGGGAAGAATG

GTCTATGGCCTGTAAACCTCTTTTGTCAAGGAAGAATAAGCGGCACGAGTGCCACCTTGC

CAGTACTTGACGAATAAGCATCGGCTAACTCCGTG

>3805 len=155 tot-seq=2

TGGGGAATTTTGGACAATGGGGGCAACCCTGATCCAGCCATGCCCGTGCAGGATGACGG

CCCTATGGGTTGTAAACTGCTTTTATAAGGGAATAAAGTGAGAGTCGTGACTCTTTTGC

ATGTACCTTATGAATAAGGACCGGCTAATTCCGTG

>3806 len=155 tot-seq=2

TGGGGAATATTGCACAATGGGCGAAAGCCTGAACCAGCCAAGTAGCGTGCAGGATGACGG

CCCTATGGGTTGTAAACTGCTTTTATGCGGGGATAAAGTCACCCACGTGTGGGTGTTTGC

AGGTACCGCATGAATAAGGACCGGCTAATTCCGTG

>3807 len=155 tot-seq=2

TGGGGAATATTGCACAATGGGGGAAACCCTGATGCAGCGACGCCCGTGAAGGAGGAAGT

ATTCGGTATGTAAAGCTCTGTCAGCAGGGAAGAAGAGAGTTGAAATACACTCTCCAATG

ACGGTACCTGAAGAAGAAGCACCGGCTAAATACGT

>3808 len=155 tot-seq=2

TGAGGAATATTGGTCAATGGACGGAAGTCTGAACCAGCCAAGTCGCGTGAAGGATGAAGG  
TTCTATGGATTGTAACTTCTTTTGTCTGAGGGTAAAAAGCGGACGTGTCCGTTCTTGC  
AAGTATCAGACGAATAAGCATCGGCTAACTCCGTG

>3809 len=155 tot-seq=2

TGAGGAATATTGGTCAATGGGTGAGAACCTGAACCAGCCAAGTAGCGTGCAGGATGACGG  
CCCTATGGGTTGTAACTGCTTTTGTACGGGGATAAAGGAGCTTACGTGTAAGTTTTTGC  
AGGTACCGTACGAATAAGGACCGGCTAATTCCGTG

>3810 len=155 tot-seq=2

TGAGGAATATTGGTCAATGGTCGGAAGACTGAACCAGCCAAGTAGCGTGAGGGACGACTG  
CCCTATGGGTTGTAACTTCTTTTATATGGGAATAAAAAAGTCTACGTGTAGACAATTGT  
ATGTACCTTATGAATAAGCATCGGCTAATTCCGTG

>3811 len=155 tot-seq=2

TGAGGAATATTGGTCAATGGGCGAGACCTTGAACCAGCCAAGTAGCGTGCAGGATGACGG  
CCCTATGGGTTGTAACTGCTTTTACGCGGGGATAAAGTGCGTGACGTGTCGCGCATCGC  
AGGTGCCGCGTGAATAAGGACCGGCTAATTCCGTG

>3812 len=155 tot-seq=2

TGAGGAATATTGGTCAATGGGCGCAAGCCTGAACCAGCCATGTAGCGTGAAGGATGACGG  
TTTTTTGATTGTAACTTCTTTTCTGTGCGATTAAAGTGTGGCATTATGCCATATTGC  
AGTTATCTCAGGAATAAGCATCGGCTAACTCCGTG

>3813 len=155 tot-seq=2

TGAGGAATATTGGTCAATGGGCGGAAGCCTGAACCAGCCATGCCGCGTGAAGGAATAAGG  
TCCTATGGATCGTAACTTCTTTTGTAGCGGGAGCAATAAGGTCTACGAGTAGACCGATGA  
GAGTACCGTTTGAATAAGCATCGGCTAACTCCGTG

>3814 len=155 tot-seq=2

TGGGGAATATTGCGCAATGGGGGAAACCCTGACGCAGCGACGCCGCGTGCGGGATGACGG  
CCCTATGGGTTGTAACTGCTTTTACGCGGGGATAAAGTGCGTGACGTGTCTCGCATTGC  
AGGTACCGCGTGAATAAGGACCGGCTAATTCCGTG

>3815 len=155 tot-seq=2

TGAGGAATATTGGTCAATGGGCGAGAGCCTGAACCAGCCAAGTCGCGTGAGGGATGAAGG  
TTCTATGGATCGTAAACCTCTTTTATAAGGGAATAAAGTTTTCCACGTGTGGAATTTGT  
ATGTACCATATGAATAAGGATCGGCTAACTCCGTG

>3816 len=155 tot-seq=2

TGAGGAATATTCCACAATGGGCGAAAGCCTGATGGAGCAATGCCGCGTGCAGGATGACGG  
CCCTATGGGTTGTAAACTGCTTTTATATGGGGATAAAGTGGGGAACGTGTTCCCTTTTGC  
AGGTACCATATGAATAAGGACCGGCTAATTCCGTG

>3817 len=155 tot-seq=2

TGAGGAATATTGGTCAATGGACGAGAGTCTGAACCAGCCAAGTAGCGTGCAGGATGACGG  
CCCTATGGGTTGTAAACTGCTTTTATGCGGGGATAAAGGAGTCCACGTGTGGGCTTTTGC  
AGGTACCGCATGAATAAGGACCGGCTAATTCCGTG

>3818 len=155 tot-seq=2

TGAGGAGTATTGGTCAATGGACGCAAGTCTGAACCAGCCATGCCGCGTGCAGGAAGACGG  
CTCTATGAGTTGTAAACTGCTTTTGTACGAGGGTAAACGCTCTTACGCGTAAGAGCCTGA  
AAGTATCGTACGAATAAGGATCGGCTAACTCCGTG

>3819 len=155 tot-seq=2

TGAGGAATATTGGTCAATGGGCGAGAGCCTGAACCAGCCAAGTAGCGTGCAGGAAGACGG  
CCCTACGGGTTGTAAACTGCTTTTATGAAGGAATAAAGTCACCCACGTGTGGGTGTTTGC  
ATGTACTTTATGAATAAGGACCGGCTAATTCCGTG

>3820 len=155 tot-seq=2

TGGGGAATATTGCACAATGGGGGAAAGCCCGACCGAGCAACGCCGCGTGAGTGATGACGG  
CCTTCGGGTTGTAAAGCTCTGTTGTAAGAAAAGATAAACTAGTAGAGAATATTAGTTAGA  
CATTATCTTACCAGAAAGCCACGGCTAACTACGTG

>3821 len=155 tot-seq=2

TGGGGAATATTGGACAATGGAGGAAACTCTGATCCAGCAATTCTGTGTGTGTGATGACGG  
CCCTATGGGTTGTAAACTGCTTTTATATGGGGATAAAGTGGGGAACGTGTTCCCTTTTGC  
AGGTACCATATGAATAAGGACCGGCTAATTCCGTG

>3822 len=155 tot-seq=2

TGAGGAATCTTGCACAATGGGCGAAAGCCTGATGCAGCGACGCCGCGTGCGGGATGAAGG



CCTTCGGGTTGTAAAGCTCTGTTGTAAGAAAAGATAAACTAGTAGAGAATATTAGTTAGA  
CATTATCTTACCAGAAAGCCACGGCTAACTACGTG

>3823 len=155 tot-seq=2

TGGGGAATATTGCGCAATGGGGGAAACCCTGACGCAGCGACGCCGCGTGCAGGATGACGG  
CCCTATGGGTTGTAACTGCTTTTGTGGGAATAATCGACATTACGTGTAATGTTTTGC  
ATGTACCATTCCGATAAGGACCGGCTAATTCCGTG

>3824 len=155 tot-seq=2

TGGGGAATCTTCCGCAATGGACGAAAGTCTGACGGAGCAGCGCCGCGTGAGTGATGACGG  
CCTTCGGGTTGTAAAGCTCTGTTGTAAGAAAAGATAAACTAGTAGAGAATATTAGTTAGA  
CATTATCTTACCAGAAAGCCACGGCTAACTACGTG

>3825 len=155 tot-seq=2

TGGGGAATCTTGACAATGGGCGAAAGCCTGAACCAGCCAAGTAGCGTGCAGGATGACGG  
CCCTATGGGTTGTAACTGCTTTTGTGGGAATAATCGACATTACGTGTAATGTTTTGC  
ATGTACCATTCCAATAAGGGCCGGCTAATTCCGTG

>3826 len=155 tot-seq=2

TGAGGAATATTGGTCAATGGGCGAGAGCCTGAACCAGCCAAGTCGCGTGAGGGAAGACGG  
TCCTACGGATTGTAACCTCTTTTGTGGGGAACAAAAGGCGCCACGCGTGGTGTATAGA  
GTGTACCCGAAGAAAAAGCATCGGCTAACTCCGTG

>3827 len=155 tot-seq=2

TGAGGAATATTGGTCAATGGGCGCAAGCCTGAACCAGCCAAGTAGCGTGAAGGATGACTG  
CCCTATGGGTTGTAACTTCTTTTATATGGGAACAATGTGCTCTACGTGTAGAGTTTTGC  
GTGTACCATATGAATAAGCATCGGCTAACTCCGTG

>3828 len=155 tot-seq=2

TGAGGAATATTGGACAATGGGTGAGAGCCTGATCCAGCCATCCCGCGTGAAGGACGACGG  
CCCTATGGGTTGTAACTTCTTTTGTACAGGGATAAACCTTTCCACGTGTGGAAAGCTGA  
AGGTACTGTACGAATAAGCACCGGCTAACTCCGTG

>3829 len=155 tot-seq=2

TGAGGAATATTGGTCAATGGACGAGAGTCTGAACCAGCCAAGTAGCGTGCAGGATGACGG  
CCCTATGGGTTGTAACTGCTTTTGTACGGGGATAAAGTGAGCCACGTGTGGTTTATTGC

AGGTACCGTACGAATAAGGACCGGCTAATTCCGTG

>3830 len=155 tot-seq=2

TGAGGAATATTGGTCAATGGTCGAGAGACTGAACCAGCCAAGTAGCGTGATGGACGACGG  
CCCTACGGGTCTTAAACATCTTTTATATGAGAATAACAAGGGGAACGCGTCCCCCTGC  
ATGTACCATATGAATAAGCATCGGCTAATTCCGTG

>3831 len=155 tot-seq=2

TAAGGAATATTGGACAATGGCCGCAAGGCTGATCCAGCCATGCCGCGTGCAGGAAGAAGG  
CCCTATGGGTCGTAAACTGCTTTTGAACGAGAGAAAACCTTTTACGTGTAAGAGGCTGA  
TAGTATCGTTAGAATAAGCATCGGCTAACTTCGTG

>3832 len=155 tot-seq=2

TGGGGAATATTGCGCAATGGGGGAAACCCTGACGCAGCCAAGTCGCGTGAGGGATGAAGG  
TTCTATGGATCGTAAACCTCTTTTATAAGGGAATAAAGTGCGGGACGTGTCCCGTTTTGT  
ATGTACCTTATGAATAAGGATCGGCTAACTCCGTG

>3833 len=155 tot-seq=2

TGGGGAATATTGGACAATGGAGGGAECTGAACCAGCCAAGTAGCGTGCAGGATGACGG  
CCCTATGGGTTGTAAACTGCTTTTGTGGGAATAATCGACATTACGTGTAATGTTTTGC  
ATGTACCATTGAATAAGGACCGGCTAATTCCGTG

>3834 len=156 tot-seq=2

CGTGGTGAAGGAGGTCCCCAGGCCTGTCTCGGCCAGACGCATCTCCAGGGAAGCAGAAG  
AAATCAGCCGGAGGAATAACCAAGACAGCTGCTTTGCTATTTCTGAAGGGGCTTAAAGA  
GGAGATCGGGTTCTCTCCGTTTGTCTGTGCACGAG

>3835 len=156 tot-seq=2

TGAGGAATATTGGTCAATGGGCGAGAGCCTGAACCAGCCAAGTAGCGTGCGGGATGAAGG  
CCCTTGTGGTCGTAAACCGCTTTTATCAGTGAATAAAGTGCAACCACGTGTGGTGTCATTG  
CAGGTAGCTGAAGAAAAGGACCGGCTAATTCCGTG

>3836 len=156 tot-seq=2

GAGCCATTGAAGGATTTTCAGCAGGGAAGCATCGAGATCCGAGTTTCATCTTCCTCATTC  
CTCCATTTATGGTGCTCTTGTAGCATTGGTTCTTACACAGCTGCATGAGGGTTTGCCAT  
GGTGTACTGCAATTGTTTGTCTACATGTCTTCTCTC

>3837 len=156 tot-seq=2

TGGGGAATATTGCACAATGGGCGCAAGCCTGATGCAGCAACGCCGCGTGAAGGAAGACTG  
CCCGCAAGGGTTGTAAACTTCTTTTGTATGGGATTAAAGTCGTCTACGTGTAGACGTTTG  
CAGTTACCATACGAATAAGCATCGGCTAACTCCGTG

>3838 len=156 tot-seq=2

TGGGGAATATTGCGCAATGGGGGAAAGCCTGAACCAGCCAAGTCGCGTGAAGGAAGACTG  
CCCGCAAGGGTTGTAAACTTCTTTTGTATGGGATTAAAGTCGTCTACGTGTAGACGTTTG  
CAGTTACCATACGAATAAGCATCGGCTAACTCCGTG

>3839 len=156 tot-seq=2

GCACAGCGGTGATGCCATGAACCACAGGGCATGAGTTATGAGTGGCTGCGAATGAATGAG  
AAACACCTATCAGCCCAGGCAATATGGAAGCACCAGGTAAGAGCCACAGGCTGTTTCCTA  
GCAGGCTGCTACAAACACACTGAAAATGGCATGTGA

>3840 len=156 tot-seq=2

TGGGGAATATTGCACAATGGGGGAAACCCTGAACCAGCCAAGTCGCGTGAGGGAAGACGG  
TCCTATGGATTGTAAACCTCTTTTGCCGGGGAGCAAGCTGTGTCACGTGTGACACAGCTG  
AGAGTACCCGGAGAAAAAGCATCGGCTAACTCCGTG

>3841 len=156 tot-seq=2

TGAGGAATATTGGTCAATGGGCGAGAGCCTGAACCAGCCAAGTCGCGTGAAGGAAGAATG  
TCCTAAGGATTGTAAACTTCTTTAGCGAGCGAGTAAGGACTTCCACGAGATGGGAGTTTG  
AAAGTAGCTCGAGAATAAGTATCGGCTAACTCCGTG

>3842 len=156 tot-seq=2

TGAGGAATATTGGTCAATGGGCGAGAGCCTGAACCAGCCAAGTCGCGTGAAGGAAGACTG  
CCCGCAAGGGTTGTAAACTTCTTTTGTATGGGATTAAAGTCGTCCACGTGTGGGCTTTTG  
CAGGTACCGCATGAATAAGGACCGGCTAATTCCGTG

>3843 len=156 tot-seq=2

TGGGGAATATTGCACAATGGGCGCAAGCCTGAACCAGCCAAGTCGCGTGAAGGAAGACTG  
CCCGCAAGGGTTGTAAACTTCTTTTGTATGGGATTAAAGTCACCTACGTGTAGGTGTTTG  
CAGTTACCATACGAATAAGCATCGGCTAGCTCCGTG

>3844 len=156 tot-seq=2

TGAGGAATATTGGTCAATGGGCTTACGCCTGAACCAGCCAAGTCGCGTGAGGGAAGACTG  
CCCTATGGGTTGTAAACCTCTTTTGTACAGGGAGCAACAACATCTACGAGTAGGTGTTACG  
AGAGTACCTGAAGAAAAAGCATCGGCTAACTCCGTG

>3845 len=156 tot-seq=2

TAGGGAATATTGGGCAATGGGCGCAAGCCTGACCCAGCCATGCCGCGTGCAGGAAGAAGG  
CCTTCTGGGTTGTAAACTGCTTTTGACAGGGAAGAAAAGGCTTTACGTGTAAGGCAATCG  
ACGGTACCTGTAGAATAAGCACCGGCTAACTCCGTG

>3846 len=156 tot-seq=2

TGAGGAATATTGGTCAATGGGCGCATGCCTGAACCAGCCAAGTCGCGTGAGGGACGACGG  
CCCTACGGGTTGTAAACCTCTTTTGCCGGGGAGCAAGGCTTTCCACGTGTGGGGAGCCGG  
AGAGTACCCTGAGAAAAAGCATCGGCTAACTCCGTG

>3847 len=156 tot-seq=2

TGGGGAATCTCCGCAATGGACGAAAGTCTGACGGAGCAACGCCGCGTGAGTGAAGACTG  
CCCGCAAGGGTTGTAAACTTCTTTGTATGGGATTAAAGTCACCTACGTGTAGGTGTTTG  
CAGTTACCATACGAATAAGCATCGGCTAACTCCGTG

>3848 len=157 tot-seq=2

CTCCTGATGAGGAGCCTTTCAGCAGATCCTGCCCACTCCCGGCTCCATGGTCTGATTCTG  
AGACAGCCCATGCCTGAGTAGAGTTTTGGCTGGGGTGTGAGCCTGGCACTCAGCCCCTT  
CCTGGGTCCTTCCACGGCCTCGGCTGGCTCCCAGCCT

>3849 len=157 tot-seq=2

TGAGGAATATTGGTCAATGGTCGCGAGACTGAACCAGCCAAGTAGCGTGCAGGATGACGG  
CCCTCTGGGTTGTAAACTGCTTTTAGTTGGGAATAAAAGGCGGTACGTGTACCGCGTATT  
GTATGTACCATCAGAAAAAGGACCGGCTAATTCCGTG

>3850 len=157 tot-seq=2

CTCCTACGGGAGGCAGCAATGGGGAATATTGGGCAATGGGCGAAAGCCTGACCCAGCGAC  
GCCGCGTGAGGGAAGAAGATCTTCGGATTGTAAACCTTAGTCAACAGGGAAGAAGAAAGT  
GACGGTACCTGTGGAGGAAGCCACGGCTAACTACGTG

>3851 len=157 tot-seq=2

AGGGAATCTTCCACAATGGACGCAAGTCTGATGGAGCAACGCCGCGTGAGTGAAGAAGGG

TTTCGGCTCGTAAAGCTCTGTTGTTGGTGAAGAAGGAAAGGTAGTAACTGACCTTTCCAG  
GACGGTAGATGAGGAGGAAGCCCCGGCTAACTATGTG

>3852 len=157 tot-seq=2

AGTAGGAACCAACAGAATCTATCTTCCTACCTAGACAATAATTACACTGGCAGAATCAGT  
GCAATATACTATTTTGGAACTCTGGAGTCTATTGAAGGCTTGCAAATCCAGGTGAAGG  
TTAGAACAGTAAATTGCAGTCAATTCAGCTCTTAGC

>3853 len=157 tot-seq=2

TTTTTTTTCAAGCAGAAGACGGCATAACGAGATTACCAAGTGACTGGAGTTCAGACGTGTG  
CTTCCGATCTCCTACGGGAGCAGCAGAGACTGAAGGACAATGGGCTTTGTTGGACAACC  
CAGATATCCCTGCACAGGCAGGGTGTACACA ACTACA

>3854 len=158 tot-seq=2

GAAGGAGGAAGGGCCGTGGTGGCTGCCGGTGGAGAACAGGCCATTATCGACAGTAGGAG  
TGTCATGGGGCCTGGTCATTTCTGTTCTCCTGAGAATGTTATTTTAAAGAAAAGTCTTC  
CTCATGACTGAAGGAGATTTTCACACGTAAGACATAGA

>3855 len=158 tot-seq=2

GTTCCAGTCTAACTGCCTGAGGCATGCTATATATCCTGGGGTATGTTGCATGTATTCTGT  
ATGTCAGGTCTAGTCAACTTTATTAAGTTATGTAATACTTGGCACATACATAAATTATA  
GTGACAGAGCCAGTGCAATGCCGGTGGAGAGCCCTAAAG

>3856 len=158 tot-seq=2

TGGGGAATATTGCACAATGGGCGCAAGCCTGATGCAGCCATGCCGCGTGTGAAGAAGACC  
TTCGGGTTGTAAAGCACTTCAGCGGGGAGGAAGGCGTTAAGGTTAATAACCTCATCGAT  
TGACGTTACCCGCAGAAGAAGCACCGGCTAACTCCGTG

>3857 len=158 tot-seq=2

TATCAATAATGCCGTAAGGCACTTCCACCTTCGCAAGCATTTCTGCTCCATGCCGAGCA  
ACTTCTGATGCTCAGCGCGGAATCTTCTGCTTGCAGTACACGAACATTTCCACCTTAT  
CGAACTGGTGCACGCGAATAATGCCGGAAGTATCCTTA

>3858 len=158 tot-seq=2

CTTCCACAATGGACGCAAGTCTGATGGAGCAACGCCGCGTGAGTGAAGAAGGGTTTCGGC  
TCGTAAAGCTCTGTTGTTGGTGAAGAAGGACAGGGGTAGTAACTGTA ACTGACCTTTGTT

TGACGGTAATCAATTAGAAAAGTCACGGCTAACTACGTG

>3859 len=158 tot-seq=2

TGGGGAATATTCCGCAATGGGCGCAAGCCTGACGGAGCAACGCCGCGTGAATGAAGAAGG

TTTTCGGATTGTAAAGTTCTGTCATTAGGGACGAAGGACCTGTGCGAATAGTGCAGGGGA

TGACGGTACCTAAGGAGGAAGCTCCGGCTAACTACGTG

>3860 len=159 tot-seq=2

CACCCCTCCACTGCAGCTTCTATCTGACTGGTAGAAGTAGTCTCCAGATTCCATCTCCCC

ACTGTTGAGCATTTTGGCTAAGGCAATCCACACTGAGTCCTTGGAGCCTCCCCTATGGCA

GGTCTCTGGGACTTCTAGAGATTCACCCAGTCCTACCC

>3861 len=159 tot-seq=2

CCGATCTCCTACGGGAGGCTGCAGTGGGGAATATGGCACAATGGGGGAAACCCTGATGCA

GCGACGCCGCGTGAAGGAAGAAGTATCTCGGTATGTAAACGTCTATCAGCAGGGAAGAGA

TTGACGGTACCTGACTAAGAAGCCCCGGCTAACTACGTG

>3862 len=159 tot-seq=2

TGGGGAATTTTTCGCAATGGGCGAAAGCCTGACGCAGCAACGCCGCGTGTGTGATGAAGG

TCTTCGGATTGTAAAGCACTTTCGACCGGGACGAAAACCCGTTGGCTAACATCCAACGGC

TTGACGGTACCGGGAGAAGAAGCACCGGCTAACTCTGTG

>3863 len=159 tot-seq=2

TGGGGAATTTTGCACAATGGGGGAAACCCTGATGCAGCGACGCCGCGTGATTTAGAAGGC

CTTCGGGTTGTAAAACCCCTGTTGTTAGAGAAGAAAGTGCGTGAGAGTAACTGTTACGTT

TCGACGGTATCTAACCAGAAAGCCACGGCTAACTACGTG

>3864 len=159 tot-seq=2

TAGGGAATCTTCGGCAATGGACGGAAGTCTGATGGAGCAACACCGCGTGAGTGAAGAAGG

GTTTCGGCTCGTAAAACCTCTGTTGTTGAAGAAGAACGTGCGTGAGAGTAACTGTTACGC

AGTGACGGTATTCAACCAGAAAGTCACGGCTAACTACAT

>3865 len=159 tot-seq=2

TAGGGAGTATTTGGCAATGGGGGAAACCCTGACCGAGCAACGCCGCGTGTGCGATGGAGT

CCCTCAGGGACGTGAAGCACTGTGGGGGGCCCAAACGGGCGGGCAGGAAATGGCCCGT

CCCCGAGGAGCCCCCTAGAAAGCGACTGCTAACCACGTG

>3866 len=159 tot-seq=2

TGGGGAATCTTGCGAATGGGCGGAAGCCTGACGCAGCAACGCCGCGTGAGGGAAGACGG  
CCTTCGGGTTGTAAACCTCTTTCAGGGGGGACGAAGCCTCCGGGGTTAATAGCCCACGGG  
GTGACGGTACCCCCAGAAGAAGCCCCGGCTAACTACGTG

>3867 len=159 tot-seq=2

TGGGGAATATTGCACAATGGGGGAAACCCTGATGCAGCCATGCCGCGTGTGTGAAGAAGG  
CCTTCGGGTTGTAAAGCACTTTTGCATTCGAGGAAGACAGCGTATAAACAAATGCGCTAT  
TTGACGTTAGAGTGTGAATAAGCACCGGCAAACCTCCGTG

>3868 len=159 tot-seq=2

GTTTGGCAGGACATGGGCTCGTGCAGTCCTTTGGCTCCAATATTCTATTTGATGTAGTTG  
TCATTATCCGATCCTTCCCCAGCAGGTAGAGGAGGCACCTGTTGCAGAATGAACATGC  
CCACCTGCTAACAGCCCATCTGCTGACTATAGGAGCCCA

>3869 len=159 tot-seq=2

TGGGGAATATTGCACAATGGGCGAAAGCCTGATGAGCAACGCCGCGTGAAGGAAGAAGGT  
TTTCGGATTGTAACTTCTGTTATAAAGGAAGAACGGCGGCTACAGGAAATGGTAGCCGA  
GTGACGGTACTTTATTAGAAAGCCACGGCTAACTACGTG

>3870 len=159 tot-seq=2

TAGGGAATCTTCCGCAATGGGCGAAAGCCTGACGGAGCAACGCCGCGTGAGTGATGAAGG  
TCTTCTGATTGTAAAGTTCTTTATTTAGGAAAAAAGCGTGCTAGGAAATGAGCGCGCC  
TTGATGGTACTAATTGAATAAGTGACAGCTAACTATGTG

>3871 len=159 tot-seq=2

TGGGGAATCTTGCGAATGGGCGAAAGCCTGACGCAGCGACGCCGCGTGAGTGATGAAGG  
CCTTCGGGTTGTAAAGCTCTGTGGAGGGGGACGAATAAGGCATGGCTAACATCCATGTCTG  
ATGACGGTACCCCTTTAGCAAGCACCGGCTAACTCTGTG

>3872 len=159 tot-seq=2

TTTTTTTTTTCAAGCAGAAGACGGCATAACGAGATCAAGTGGTGACTGGAGTTTAGACGTG  
TGCTCTCCGATCTACTACGGGAGGCAGCAGCAGTTGGAACAGCAAGTCTCCAGTCTCT  
CCTGAGGCAGAGACCTAAAGCATGAACGAACTCCTTAGC

>3873 len=159 tot-seq=2

ATTATCCCAGCAGCGTGAGCTTTGCAAAATCCCGTCTCGTGGCTGAGCAAACCTGCTCG  
ATGTGCCACAACCTTTCCGTCAGTAACATGCCTATATGCTCATTTTCAAACATTATCTCTG  
CCAGGAGGGATAATTTGCTGTAATATGAGGATGAGACAT

>3874 len=159 tot-seq=2

GTGTCTGATAGCTGTAAGTGTGCTTTACGGTTCATGAGCACGCACACATAGGCCATAATA  
TCATATCTCTGGTCACCCTGGTAGGTAGATATTATTGCCCCAGGTTTCAGGTAAGAAGAC  
TAAAGACCAGGGGTCAATTGCTTGTCTCAGAGTCCCACAG

>3875 len=159 tot-seq=2

CCCCAGGAGGACACATCAGTAACGATAATGGTGGTGATGATAATGACATGATAATAATAG  
CAGTGATGATGATGATGATCATGATTAACAGCCATTATCTACTGAGTGCCTGAATTTGTG  
TCAGACACTGTCCAGCACTGTCACCCGGGTCAGGTGCCA

>3876 len=159 tot-seq=2

TGAGGAATTTTTACAATGGACGAAAGTCTGATGGAGCAATACCACGTGAACGATGAAGG  
TCTTCTGATTGTAAAGTTCTTTATTTAGGAAAAAAGCGTGCTAGGAAATGAGTGCGCC  
TTGATGGTACTAATTGAATAAGGACCGGCTAATTCCGTG

>3877 len=160 tot-seq=2

TGGGGGATATTGGACAATGGGGGAAACCCTGATCCAGCCATGCCGCGTGTCTGAAGAAGG  
CCTTCGGGTTGTAAAGGACTTTTGTGAGGGAAGAAAAGGCTGTTGCTAATACCAACAGCT  
GATGACGGTACCTGAAGAATAAGCACCGGCTAACTACGTG

>3878 len=160 tot-seq=2

TGGGGGATATTGGACAATGGGGGAAACCCTGATCCAGCGACGCCGCGTGTCTGAAGAAGG  
CCTTCGGGTCGTAAAGCTCTGTTGCGGGGGAAAAAAGGCAGCATCAGGAAATGGGTGCTG  
ACTGATGGTGCCCCGCCAGAAAGTCACAGCTAACTACGTG

>3879 len=160 tot-seq=2

TAGGGAATTTTCGTCAATGGGCGCAAGCCTGAACGAGCGATGCCGCGTGTCTGAAGAAGG  
CCTTCGGGTCGTAAAGCTCTGTTGGTAGTGAAGAAAGATAGAGGTAGTAACTGGCCTTTA  
TTGACGGTAATTAAGTAAAGTACAGGCTAACTACGTG

>3880 len=160 tot-seq=2

TGGGGAATTTTCGTCAATGGGCGCAAGCCTGATCCAGCCATGCCGCGTGTCTGAAGAAGG



CCTTCGGGTCGTAAAGCTCTGTTGCGGGGGAAAAAAGGCAGCATCAGGAAATGGGTGCTG  
ACTGATGGTGCCCCGCCAGAAAGTCACGGCTAACTACGTG

>3881 len=160 tot-seq=2

TAGGGAATCTTCGGCAATGGACGGAAGTCTGACCGAGCAACGCCGCGTGAGTGAAGAAGG  
TTTTCGGATCGTAAAGCTCTTTTGTGAGGGAAGAAAAGGTGATCTCTAATACAGGTCCT  
CATGACGGTACCTGAAGAATAAGCACCGGCTAACTACGTG

>3882 len=160 tot-seq=2

TGGGGAATATTGGACAATGGGCGAAAGCCTGATGGAGCAACGCCGCGTGAGTGAAGG  
TCTTCGGATCGTAAACTCTGTTATCAGGGAAGAACAATGTGTAAGTAACTGTGCACAT  
CTTGACGGTACCTGATCAGAAAGCCACGGCTAACTACGTG

>3883 len=160 tot-seq=2

TGGGGAATATTGCACAATGGGCGCAAGCCTGATGCAGCCATGCCGCGTGATGAAGAAGG  
CCTTCGGGTTGTAAAGTACTTTTACGCGGGGAGGAAGGGAGCAAAGTTAATACCTTTGCTC  
ATTGACGTTAAATACAGAAGAAGCACCGGCTAACTCCGTG

>3884 len=160 tot-seq=2

TGGGGAATATTGGACAATGGGCGCAAGCCTGATCCAGCCATGCCGCGTGAGTGAAGG  
TCTTCGGATCGTAAACTCTGTTATCAGGGAAGAACAACGTGTAAGTAACTGTGCACGT  
CTTGACGGTACCTGATCAGAAAGCCACGGCTAACTACGTG

>3885 len=160 tot-seq=2

TGGGGAATATTGGACAATGGGGGAAACCCTGATCCAGCCATGCCGCGTGTGTGAAGAAGG  
CCCTCGGGTTGTAAAGTTCTTTGCGTATTGAGGAAGGTTGATGTGTTAATAGTACATCAA  
ATTGACGTTAAATACAGAAGAAGCACCGGCTAACTCCGTG

>3886 len=160 tot-seq=2

TAGGGAATCTTCGCAATGGGCGAAAGCCTGACGGAGCAACGCCGCGTGAGTGAAGG  
CCCTCGGGTTGTAAAGCTCTTTTGTGAGGGAAGAAAAGGTGATCTCTAATACAGGTCCT  
CATGACGGTACCTGAAGAATAAGCACCGGCTAACTACGTG

>3887 len=160 tot-seq=2

TGGGGAATATTGCGCAATGGGGGGAACCCTGACGCAGCCATGCCGCGTGAATGAAGAAGG  
CCTTAGGGTTGTAAAGTTCTTTTACGCGGGGAGGAAGGGAGTAAAGTTAATACCTTTGCTC

ATTGACGTTACCCGCAGAAGAAGCACCCGGCTAACTCCGTG

>3888 len=160 tot-seq=2

TGGGGAATATTGCACAATGGGCGCAAGCCTGATGCAGCCATGCCGCGTGAATGAAGAAGG

CCTTAGGGTTGTAAAGTTCTTTCGGTATTGAGGAAGGTTGATGTGTTAATAGCACATCAA

ATTGACGTTAAATACAGAAGAAGCACCCGGCTAACTCCGTG

>3889 len=160 tot-seq=2

TGAGGAATATTGGTCAATGGACGAGAGTCTGACCGAGCAACGCCGCGTGAGTGAAGAAGG

TTTTCGGATCGTAAACTCTGTTGTTAGAGAAGAACAAGGACGTTAGTAACTGAACGTCC

CCTGACGGTATCTAACCAGAAAGCCACGGCTAACTACGTG

>3890 len=160 tot-seq=2

TGGGGAATTTTGGACAATGGGCGCAAGCCTGATCCAGCAATGCCGCGTGTGTGAAGAAGG

CCTTCGGATTGTAAAGCACTTTAAGTTGGGAGGAAGGGCAGTTGCCTAATACGTAAGTGT

TTTGACGTTACCGACAGAATAAGCACCCGGCTAACTCTGTG

>3891 len=160 tot-seq=2

TGGGGAATATTGGACAATGGGCGCAAGCCTGATCCAGCCATGCCGCGTGTGTGAAGAAGG

CCTTAGGGTTGTAAAGCACTTTTCAGTGGGGAGGAAGGGGTGAATGTTAATAGTATTCATC

TTTGACGTTACCCACAGAAGAAGCACCCGGCTAACTCCGTG

>3892 len=160 tot-seq=2

TGGGGAATTTTGGACAATGGGCGAAAGCCTGATCCAGCAATGCCGCGTGTGTGAAGAAGG

CCTTCGGGTTGTAAAGCACTTTTGTCCGAAAGAAATCCCTGATCCTAATATGGCCGGGG

GATGACGGTACCGGAAGAATAAGCACCCGGCTAACTACGTG

>3893 len=160 tot-seq=2

TGGGGAATATTGGACAATGGGGGGAACCCTGATCCAGCCATGCCGCGTGTGTGAAGAAGG

TCTTCGGATTGTAAAGCACTTTAAGTTGGGAGGAAGGGTTTGCAGTTAATACCTGCGAAT

TTTGACGTTACCAACAGAATAAGCACCCGGCTAACTTCGTG

>3894 len=160 tot-seq=2

TGGGGAATATTGCACAATGGGCGCAAGCCTGATGCAGCCATGCCGCGTGTATGAAGAAGG

CCTTCGGGTTGTAAAGCTCTTTTGTGAGGGAAGAAAAGGTGATCTCTAATACAGGTCCT

CATGACGGTACCTGAAGAATAAGCACCCGGCTAACTACGTG

>3895 len=160 tot-seq=2

TGGGGAATATTGCACAATGGGCGCAAGCCTGATGCAGCCATGCCGCGTGTATGAAGAAGG  
CCTTCGGGTTGTAAAGCCCTTTTGTGGGAAAGAAATCCAGCCGGCTAATACCTGGTTGG  
GATGACGGTACCCAAAGAATAAGCACCGGCTAACTTCGTG

>3896 len=160 tot-seq=2

TAGGGAATCTTCCACAATGGGCGCAAGCCTGATGGAGCAACGCCGCGTGAATGAAGAAGG  
TCTTCGGATCGTAAAGTTCTGTTGTTAGAGAAGAACACGTGTGAGAGTAACTGTCCATGC  
GTTGACGGTATCTAACCAGCAAGTCACGGCTAACTACGTG

>3897 len=160 tot-seq=2

TAGGGAATTTTCGGCAATGGGCGAAAGCCTGACCGAGCAACGCCGCGTGAGGGAGGAAGT  
ATTCGGTATGTAAACCTCTGTTATAAAGGAAGAACGGCGCATGTAGGGAATGACATGCG  
AGTGACGGTACTTTATGAGAAAGCCACGGCTAACTACGTG

>3898 len=160 tot-seq=2

TGGGGAATTTTGGACAATGGGCGCAAGCCTGATCCAGCCATGCCGCGTGCGGGAAGAAGG  
CCTTCGGGTTGTAAACCGCTTTTGGCAGGAACGAAACGGCGGAGCGAATACCTTGCGCT  
AATGACGGTACCTGCAGAATAAGCACCGGCTAACTACGTG

>3899 len=160 tot-seq=2

TAGGGAATCTTCCACAATGGACGCAAGTCTGATGGAGCAACGCCGCGTGAGTGAAGAAGG  
TCTTCGGATCGTAAAGTACTTTTTCAGCAGGGAGGAAGGGAGTAAAGTTAATACCTTTGCTC  
ATTGACGTTACCCGCAGAAGAAGCACCGGCTAACTCCGTG

>3900 len=160 tot-seq=2

TAGGGAATCTTCGGCAATGGGGGCAACCCTGACCGAGCAACGCCGCGTGAGTGAAGAAGG  
TTTTCGGATCGTAAAGCTCTGTTGTAAGAGAAGAACGTGTGTGAGAGTAACTGTTACGCT  
TTCGACGGTATCTAACCAGAAAGCCACGGCTAACTACGTG

>3901 len=160 tot-seq=2

TAGGGAATCTTCCACAATGGGCGAAAGCCTGATGGAGCAACGCCGCGTGGGTGAAGAAGG  
TCTTCGGATCGTAAACCTGTTGTTAGAGAAGAAAGTGCGTGAGAGTAACTGTTACGCT  
TTCGACGGTAATTACTIONTAGAAAGTCACGGCTAACTACGTG

>3902 len=160 tot-seq=2

TGGGGAATTTTCGACAATGGGGGGAACCTGATCGAGCCATCTCGCGTGTGGGACGAAGG  
CCTTCGGGTTGTAAACCACTTTTCTCAACGAAGAAAAGTCTTAGGCTAATACCTTAAGAT  
GCTGACGGTAGTTGAGGAATAAGCACCGGCTAACTACGTG

>3903 len=160 tot-seq=2

TAGGGAATCTCCGCAATGGGCGAAAGCCTGACGGAGCAACGCCGCGTGAGTGAAGAAGG  
ATTCGGTTCGTAAAGCTCTGTTGTTGGTGAAGAAGGACAGGGGTAGTAACTGACCTTTG  
TTTGACGGTAATCAATTAGAAAAGTCACGGCTAACTACGTG

>3904 len=160 tot-seq=2

TAGGGAATCTCCACAATGGACGCAAGTCTGATGGAGCAACGCCGCGTGAGTGATGACGG  
TCTTCGGATTGTAAAGCTCTGTTGTTGGTGAAGAAGGACAGGGGTAGTAACTGACCTTTG  
TTTGACGGTAATCAATTAGAAAAGTCACGGCTAACTACGTG

>3905 len=160 tot-seq=2

TAGGGAATCTCCACAATGGACGCAAGTCTGATGGAGCAACGCCGCGTGTCTGAAGAAGG  
CCTTCGGGTTGTAAAGGACTTTTGTGAGGGAAGAAAAGGGCGGGGTTAATACCCCTGTCT  
GATGACGGTACCTGAAGAATAAGCACCGGCTAACTACGTG

>3906 len=160 tot-seq=2

TGGGGAATTTTGCACAATGGGGGAAACCTGATGCAGCGACGCCGCGTGATTTAGAAGGC  
CTTCGGGTTGTAAAACCTCTGTGATTCGGGACGAAAGATAAGTAGACGAATAATCTGCATA  
AGTGACGGTACCGAAAAGCAAGCCACGGCTAACTACGTG

>3907 len=160 tot-seq=2

TGGGGAATCTCCGCAATGGGCGAAAGCCTGACGGAGCAATGCCGCGTGAGTGAAGAAGG  
CCTTCGGGTTGTAAAGCTCTATCCTTGTCCAAGAGAGCAGAGTATAGTAACTGATAGTCT  
GAGGACGGTAGACAAGAAGGAAGCCCCGGCTAACTATGTG

>3908 len=160 tot-seq=2

TGGGGGATATTGCGCAATGGGCGCAAGCCTGATGCAGCCATGCCGCGTGATGAAGAAGG  
CCTTCGGGTTGTAAAGTACTTTTACGCGGGGAGGAAGGTGTTGTGGTTAATAGCCGCAGCA  
ATTGACGTTACCCGCAGAAGAAGCACCGGCTAACTCCGTG

>3909 len=160 tot-seq=2

TGGGGAATTTTGGACAATGGGCGAAAGCCTGATCCAGCAATGCCGCGTGTGCGAAGAAGG

CCTTCGGGTTGTAAAGCACTTTTGTCCGGAAAGAAATCCGTCTGGCTAATACCCGGATGG  
GATGACGGTACCGGAAGAATAAGCACCGGCTAACTACGTG

>3910 len=160 tot-seq=2

TGGGGAATTTTGGACAATGGGGGCAACCCTGATCCAGCCATGCTGCGTGAGTGAAGAAGG  
CCTTCGGGTTGTAAAGCTCTTCGGACGGAACGAAATTGCCTGGACCAATACTCTGGGTA  
GATGACGGTACCGTAAGAAGAAGCACCGGCTAACTACGTG

>3911 len=160 tot-seq=2

TGGGGAATTTTGGACAATGGGGCAAAAGCCTGATCCAGCAATGCCGCGTGTGTGAAAAAGG  
CCTTCGGGTTGCAAAGCACTTTTGTCCGGAAAAAAATGGCTCTGGTTAATACCTGGGGTC  
GATGACGGTACCGGAAAAATAAGGACCGGCTAACTACATG

>3912 len=160 tot-seq=2

TAGGGAATCTTCCACAATGGACGAAAGTCTGATGGAGCAACGCCGCGTGAGTGAAGAAGG  
TTTTCGGATCGTAAACTCTGTTGTTGGAGAAGAACACGTTTGAGAGTAACTGTTTCAGAC  
GTTGACGGTATCCAACCAGAAAGCCACGGCTAACTACGTG

>3913 len=160 tot-seq=2

TGGGGAATATTGCACAATGGGGCGCAAGCCTGATGCAGCCATGCCGCGTGTATGAAGAAGG  
GTTTCGGCTCGTAAACTCTGTTGTTGAAGAAGAACGTGCGTGAGAGTAACTGTTTCACGC  
AGTGACGGTATTCAACCAGAAAGTCACGGCTAACTACGTG

>3914 len=160 tot-seq=2

TGGGGAATCTTGCACAATGGGGGGAACCCTGACGCAGCGACGCCGCGTGCGGGACGGAGG  
CCTTCGGGTTGTAAAGTACTTTTCAGCGGGGAGGAAGGGAGTAAAGTTAATACCTTTACTC  
ATTGACGTTACCCGCAGAAGAAGCACCGGCTAACTCCGTG

>3915 len=160 tot-seq=2

TGGGGAATTTTGCACAATGGGGGAAACCCTGATGGAGCAACACCGCGTGAGTGAAGAAGG  
GTTTCGGCTCGTAAACTCTGTTGTTGGAGAAGAACGTGCGTAAGAGTAACTGTTTACGC  
AGTGACGGTATCCAACCAGAAAGTCACGGCTAACTACGTG

>3916 len=160 tot-seq=2

TAGGGAATATTGCACAATGGAGGAAACTCTGATGCAGCCATGCCGCGTGTGTGAAGAAGG  
TTTTCGGATCGTAAACTCTGTTGTTAGAGAAGAACAAGGACGTTAGTAACTGAACGTCC

CCTGACGGTATCTAACCAGAAAGCCACGGCTAACTACGTG

>3917 len=160 tot-seq=2

TGAGGAATATTGGTCAATGGACGCAAGTCTGAACCAGCCATGCCGCGTGTATGAAGAAGG  
CCTTCGGGTTGTAAAGTACTTTTCAGCGGGGAGGAAGGGAGTAAAGTTAATACCTTTGCTC  
GTTGACGTTACCCGCAGAAGAAGCACCGGCTAACTCCGTG

>3918 len=160 tot-seq=2

TAGGGAATCTTCCACAATGGGCGCAAGCCTGATGGAGCAACACCGCGTGAGTGAAGAAGG  
GCTTCGGCTCGTAAACTCTGTTGTTGGAGAAGAACGTGCGTAAGAGTAACTGTTTACGT  
TTCGACGGTATCTAACCAGAAAGCCACGGCTAACTACGTG

>3919 len=160 tot-seq=2

TAGGGAATCTTCGGCAATGGACGGAAGTCTGACCGAGCAACGCCGCGTGAGTGAAGAAGG  
TTTTCGGATCGTAAAGCTCTGTTGTTGAAGAAGAACGTGCGTGAGGGCAACTGTTACGC  
AGTGACGGTATTCAACCAGAAAGTCACGGCTAACTACGTG

>3920 len=160 tot-seq=2

TAGGGAATCTTCCACAATGGACGCAAGTCTGATGGAGCAACGCCGCGTGGGTGAAGAAGG  
TCTTCGGATCGTAAACCCTGTTGTTAGAGAAGAAAGTGCGTGAGAGTAACTGTTTCAGGT  
AGTGACGGTATCCAACCAGAAAGTCACGGCTAACTACGTG

>3921 len=160 tot-seq=2

TAGGGAATCTTCCACAATGGGCGAAAGTCTGACGGAGCAACGCCGCGTGAGTGATGACGG  
TCTTCGGATTGTAAAGTACTTTTCAGCGGGGAGGAAGGGAGTAAAGTTAATACCTTTGCTC  
ATTGACGTTACCCGCAGAAGAAGCACCGGCTAACTCCGTG

>3922 len=160 tot-seq=2

TGGGGAATTTTGCACAATGGGGGAAACCCTGATGCAGCCATGCCGCGTGTATGAAGAAGG  
CCTTCGGGTTGTAAAGTACTTTTCAGCGGGGAGGAAGGGAGTAAAGTTAATACCTTTACTC  
ATTGACGTTACCCGCAGAAGAAGCACCGGCTAACTCCGTG

>3923 len=160 tot-seq=2

TAGGGAATCTTCCACAATGGGCGCAAGCCTGATGGAGCGACACCGCGTGAGTGAAGAAGG  
GTTTCGGCTCGTAAAGCTCTGTTGTTAAAGAAGAACGTGCGTGAGAGTAACTGTTTCAGGT  
AGTGACGGTATCCAACCAGAAAGTCACGGCTAACTACGTG

>3924 len=160 tot-seq=2

TGGGGAATATTGCACAATGGGCGCAAGCCTGATGGAGCAACACCGCGTGAGTGAAGAAGG  
TTTTCGGATCGTAAAGCTCTGTTGTTGGTGAAGAAGGATAGAGGCAGTAACTGGCCTTTA  
TTTGACGGTAATCAACCAGAAAGTCACGGCTAACTACGTG

>3925 len=160 tot-seq=2

TAGGGAATCTTCCACAATGGGCGCAAGCCTGATGGAGCAACACCGCGTGAGTGAAGAAGG  
TCTTCGGATCGTAAAGCTCTGTTGTAAGTGAAGAACGGCTCATAGAGGAAATGCTATGGG  
AGTGACGGTAGCTTACCAGAAAGCCACGGCTAACTACGTG

>3926 len=160 tot-seq=2

TGGGGAATATTGCACAATGGAGGGAAGTCTGATGCAGCGACGCCGCGTGAACGAAGAAGG  
CTTTCGGATCGTAAAGCTCTGTTGTTGGTGAAGAAGGATAGAGGCAGTAACTGGCCTTTA  
TTTGACGGTAATCAACCAGAAAGTCACGGCTAACTACGTG

>3927 len=160 tot-seq=2

TGGGGAATATTGGACAATGGGCGCAAGCCTGATCCAGCAATGCCGCGTGTGTGAAGAAGG  
CCTGAGGGTTGTAAAGCACTTTCGTTGGGGAAGAAGGGGATGGCCTGAATAGGGTCATTT  
TTTGACGGTACCTGAAGAAGAAGCACTGGCTAACTCTGTG

>3928 len=160 tot-seq=2

TGGGGAATCTTCCGCAATGGGCGCAAGCCTGACGGAGCAATGCCGCGTGAGTGAAGAAGG  
CCTTCGGTTCGTAAACTCTGTTGTTAGAGAAGAACAGCGCATAGAGTAACTGTTATGCG  
TGTGACGGTATCTAACCAGAAAGCCACGGCTAACTACGTG

>3929 len=160 tot-seq=2

TGGGGAATATTGGACAATGGGCGCAAGCCTGATCCAGCCATGCCGCGTGTGTGAAGAAGG  
CCTTCGGGTTGTAAAGCACTTTCAGCGAGGAGGAAGGGTTGTGTGTTAATAGTACACAGC  
CTTGACGTTACTCGAGAAGAAGCACCGGCTAACTCTGTG

>3930 len=160 tot-seq=2

TGGGGAATTTTGGACAATGGGCGCAAGCCTGATCCAGCCATTCCGCGTGAGTGAAGAAGG  
CCTTCGGGTTGTAAAGCTCTTTCAGCAGGAACGAAACGGTGGGTCTTAATACGGCCTGCT  
AATGACGGTACCTGCAGAAGAAGCACCGGCTAACTACGTG

>3931 len=160 tot-seq=2

TGGGGAATTTTGGACAATGGGGGAAACCCTGATCCAGCCATGCCGCGTGCGGGATGAAGG  
CCTTCGGGTTGTAAAGCTCTGTTGTTGGTGAAGAAGGACAGGGGTAGTAACTGACCTTTG  
TTTGACGGTAATCAATTAGAAAAGTCACGGCTAACTACGTG

>3932 len=160 tot-seq=2

TAGGGAATCTTCCACAATGGACGCAAGCCTGACGGAGCAACGCCGCGTGAGTGATGAAGG  
TCTCCGGATCGTAAAACCTCTGTTATTAGGGAAGAACAACGTGTAAGTAACTGTGCACGT  
CTTGACGGTACCTAATCAGAAAGCCACGGCTAACTACGTG

>3933 len=160 tot-seq=2

TAGGGAATCTTCGGCAATGGGGGAAACCCTGACCGAGCAACGCCGCGTGAGTGAAGAAGG  
TTTTCGGATCGTAAAACCTCTGTTGTAAGAGAAGAACAATTGTAGAGTAACTGCTACAGT  
CTTGACGGTATCTTACCAGAAAGCCACGGCTAACTACGTG

>3934 len=160 tot-seq=2

TAGGGAATCTTCGGCAATGGACGAAAGTCTGACCGAGCAACGCCGCGTGAGTGAAGAAGG  
TTTTCGGATCGTAAAACCTCTGTTGTTAGAGAAGAACGTGGGTAAGAGTAACTGTTTACCC  
AGTGACGGTATTTAACAGAAAGCCACGGCTAACTACGTG

>3935 len=160 tot-seq=2

TGGGGAATATTGCACAATGGAGGGAACCTCTGATGCAGCGACGCCGCGTGAACGAAGAAGG  
CCTTCGGGTTGTAAAGTACTTTTCAGCGGGGAGGAAGGGAGTAAAGTTAATACCTTTGCTC  
ATTGACGTTACCCGCAGAAGAAGCACCGGCTAACTCCGTG

>3936 len=160 tot-seq=2

TGGGGAATATTGCACAATGGGGGAAACCCTGATGCAGCGACGCCGCGTGGAGGAAGAAGG  
TCTTCGGATTGTAAAGCTCTGTTGTTAAGAAGAACGTGGGTAAGAGTAACTGTTTACCC  
AGTGACGGTATTTAACAGAAAGCCACGGCTAACTACGTG

>3937 len=160 tot-seq=2

TAGGGAATCTTCCACAATGGACGCAAGTCTGATGGAGCAACGCCGCGTGAGTGAAGAAGG  
GTTTCGGCTCGTAAAGCTCTGTTGTTAAGAAGAACGTGGGTAAGAGTAACTGTTTACCC  
AGTGACGGTAACTTACCAGAAAGGGACGGCTAACTACGTG

>3938 len=160 tot-seq=2

TGGGGAATATTGCGCAATGGGGGAAACCCTGACGCAGCGACGCCGCGTGCGGGATGAAGG



CCTTCGGGTTGTAAACCGCTTTTGT CAGGGACGAAAAGGACCGTGTTAATACCATGGTCT  
GCTGACGGTACCTGAAGAATAAGCACCGGCTAACTACGTG

>3939 len=160 tot-seq=2

TGGGGAATATTGCACAATGGAGGAACTCTGATGCAGCGACGCCGCGTGAAGGATGAAGT  
ATTTCCGGTATGTAAAGTACTTT CAGCGGGGAGGAAGGGAGTAAAGTTAATACCTTTGCTC  
ATTGACGTTACCCGCAGAAGAAGCACCGGCTAACTCCGTG

>3940 len=160 tot-seq=2

TGGGGAATATTGCGCAATGGGGGAAACCCTGACGCAGCCATGCCGCGTGAATGAAGAAGG  
CCTTCGGGTTGTAAAGTCTTTCCGGTATTGAGGAAGGAGTGTATGTTAATAGCATGCATT  
ATTGACGTTAATAACAGAAGAAGCACCGGCTAACTCCATG

>3941 len=160 tot-seq=2

TGGGGAATATTGCGCAATGGGGGAAACCCTGACGCAGCGACGCCGCGTGCGGGATGAAGG  
CCTTCGGGTTGTAAAGCTCTGTTGTTAAGAAGAACGTGGGTAAGAGTAACTGTTTACCC  
AGTGACGGTATTTAACAGAAAGCCACGGCTAACTACGTG

>3942 len=160 tot-seq=2

TGGGGAATTTTGGACAATGGGCGCAAGCCTGATCCAGCCATTCCGCGTGAGTGAAGAAGG  
CCTTCGGGTTGTAAAGCTCTTTCCGAAGGGAAGAAACTTAACCTTAACATAGGTTGAG  
GCTGACGGTACCTTGATAAGAAGCACCGGCTAACTACGTG

>3943 len=160 tot-seq=2

TAGGGAATCTTCCACAATGGACGCAAGTCTGATGGAGCCATGCCGCGTGTGTGAAGAAGG  
TCTTCGGATTGTAAAGCACTTTAAGTTGGGAGGAAGGGCAGTAAATTAATACTTTGCTGT  
TTTGACGTTACCGACAGAATAAGCACCGGCTAACTCTGTG

>3944 len=160 tot-seq=2

TGGGGAATATTGCGCAATGGGGGAAACCCTGACGCAGCGACGCCGCGTGCGGGATGAAGG  
CCTTCGGGTTGTAAAGCGCTTTTGTCCGAAAGAAATCCTTGGCTCTAATACAGTCGGGG  
GATGACGGTACCGGAAGAATAAGCACCGGCTAACTACGTG

>3945 len=160 tot-seq=2

TAGGGAATCTTCCACAATGGACGCAAGTCTGATGGAGCAACGCCGCGTGAGTGAAGAAGG  
CCTTCGGGTTGTAAAGTCTTTCCGGTAATGAGGAAGGGATGTTGTTAATAGATAGCATC

ATTGACGTTAATTACAGAAGAAGCACCGGCTAACTCCGTG

>3946 len=160 tot-seq=2

TGGGGAATTTTGGACAATGGACGCAAGTCTGATCCAGCCATTCCGCGTGCAGGATGAAGG  
CCCTCGGGTTGTAAACTGCTTTTGTACGGAACGAAAAGGTTTCCATTAATACTGGGAGCT  
CATGACGGTACCGTAAGAATAAGCACCGGCTAACTACGTG

>3947 len=160 tot-seq=2

TAGGGAATCTTGACAATGGGCGCAAGCCTGATGCAGCCATGCCGCGTGTATGAAGAAGG  
CCTTCGGGTTGTAAAGTACTTTTCAGCGGGGAGGAAGGCGGTGCGGTTAATAACCGCGCCG  
ATTGACGTTACCCGCGAGAAGAAGCACCGGCTAACTCCGTG

>3948 len=160 tot-seq=2

TAGGGAATCTTCCGCAATGGACGCAAGTCTGACGGAGCAACGCCGCGTGTGTGAAGAAGG  
TCTTCGGATCGTAAAGCACTGTTATTAGAGAAGAACACCCTGTAGAGTAACTGTTACAGG  
ATTGACGGTATCTAACCAGAAAGTGACGGCTAACTACGTG

>3949 len=160 tot-seq=2

CTAAGAATCTTCCGCAATGGACGCAAGTCTGACGGAGCGACACCGCGTGAATGAAGAAGG  
CCGAAAGGTTGTAAAATTCTTTTAAGTCTGAAGAATAAGCAGTGTAGGGAATGATACTGT  
GATGACGGTAAGGCTTGAATAAGCCCCGGCTAATTACGTG

>3950 len=160 tot-seq=2

TAGGGAATCTTCCGCAATGGACGAAAGTCTGACGGAGCAACGCCGCGTGAGTGAAGAAGG  
ATTTTCGGTTCGTAAACTCTGTTGTTAGGGAAGAAAAAATTGTAGAGTAACTGCTACAGT  
CTTGACGGTATCTTACCAGAAAGCCACGGCTAACTACATG

>3951 len=160 tot-seq=2

TGGGGAATCTTGACAATGGGCGAAAGTCTGATGGAGCAACGCCGCGTGAGTGAAGAAGG  
GTTCCGGCTCGTAAAGCTCTGTTGGTAGTGAAGAAAGATAGAGGTAGTAACTGGCCTTTA  
TTTGACGGTAATCAACCAGAAAGTCACGGCTAACTACGTG

>3952 len=160 tot-seq=2

TAGGGAATCTTCCGCAATGGGCGCAAGCCTGACGGAGCAACGCCGCGTGAGTGATGAAGG  
TTTTTCGGATCGTAAAGCTCTGTTGCCAAGGAAGAACGCCTGGGAGAGTAACTGCTCCTAG  
GGTGACGGTACTTGAGAAGAAAGCCCCGGCTAACTACGTG

>3953 len=160 tot-seq=2

TAGGGAATCTCCACAATGGGCGCAAGCCTGATGGAGCAACACCGCGTGAGTGAAGAAGG  
GTTTCGGCTCGTAAACTCTGTTGTTGAAGAAGAACGTGCGTGAGAGTAACTGGCCTTTA  
TTTGACGGTAATTAAGTACGAAAGTACCGGCTAACTACGTG

>3954 len=160 tot-seq=2

TGGGGAATTTTGGACAATGGGCGCAAGCCTGATCCAGCCATGCCGCGTGTCTGGAGAAGG  
CCTTCGAGTTGTAAAGGACTTTTGTGAGGAAAGAAAGGCTGTCGCTAATACCGACAGTT  
GATGACGGTACCTGAAGAATAAGCACCGGCTAACTACGTG

>3955 len=160 tot-seq=2

TGGGGAATATTGGACAATGGGGGAAACCCTGATCCAGCCATGCCGCGTGTGTGAAGAAGG  
TCTTAGGATTGTAAAGCACTTTAAGTTGGGAGGAAGGACAGTTAACTAATATTTGACTGT  
TTTGACGTTACCGACAGAATAAGCACCGGCTAACTTCGTG

>3956 len=160 tot-seq=2

TGGGGAATTTTGCACAATGGGGGAAACCCTGATGCAGCGACGCCGCGTGATTTAGAAGGC  
CTTCGGGTTGTAAAGCTCTGTTGTAAGAGAAGAACGAGTGTGAGAGTGGAAAGTTCACAC  
TGTGACGGTATCTTACCAGAAAGGGACGGCTAACTACGTG

>3957 len=160 tot-seq=2

TAGGGAATCTCCACAATGGACGCAAGTCTGATGGAGCAACGCCGCGTGAGTGAAGAAGG  
GTTTCGGTTCTTAAACTCTGTTGTTAGGGAAGAAAAAATGTATAGTAACTATATACAAA  
AGAGACGGTACCTAACAGAAAGCCACGGCTAACTACGTG

>3958 len=160 tot-seq=2

TGGGGAATTTTGGACAATGGGCGCAAGCCTGATCCAGCAATGCCGCGTGCGGGAAGAAGG  
GTTTCGGCTCGTAAAGCTCTGTTGTTGGTGAAGAAGGACAGGGGTAGTAACTGACCTTTG  
TTTGACGGTAATCAATTAGAAAGTACCGGCTAACTACGTG

>3959 len=160 tot-seq=2

TGGGGAATATTGCACAATGGGGGAAACCCTGATGCAGCAACGCCGCGTGAGTGATGAAGG  
TTTTCGGGTTGTAAAGCACTTTGAGCGGGGAGGAAGGCGATAAGGTTAATAACCTTGTCG  
ATTGACGTTACCCGAGAAAGAACCGGCTAACTCCGTG

>3960 len=160 tot-seq=2

TAGGGAATTTTTACAATGGGCGCAAGCCTTATGAAGCAATGCCGCGTGTATGAAGAAGG  
CCTTCGGGTTGTAAAGTACTTTTCAGCGGGGAGGAAGGGAGTAAAGTTAATACCTTTGCTC  
ATTGACGTTACCCGCAGAAGAAGCACCGGCTAACTCCGTG

>3961 len=160 tot-seq=2

TGGGGAATATTGCACAATGGGCGCAAGCCTGATGCAGCCATGCCGCGTGTATGAAGAAGG  
CCTTCGGGTTGTAAAGTGCTGTTATAAGGGAAGAACATTTGCAATAGGAAATGATTGCAG  
ACTGACGGTACCTTGTGAGAAAGCGATGGCTAACTATGTG

>3962 len=160 tot-seq=2

TAGGGAATCTTCCACAATGGGCGCAAGCCTGATGGAGCAACACCGCGTGAGTGAAGAAGG  
GTTTCGGCTCGTAAAGCTCTGTTGTTGGAGAAGAACGTGCGTGAGAGTAACTGTTACGC  
AGTGACGGTAATTACTTAGAAAAGTCACGGCTAACTACGTG

>3963 len=160 tot-seq=2

TAGGGAATTTTCGGCAATGGGGGGAACCCTGACCGAGCAACGCCGCGTGAAGGAAGAAGG  
TTTTCGGATTGTAAACTTCTGTTATAAAGGAAGAACGACTGTAGGAGGGAATGCCTATAG  
AGTGACGGTACTTTATGAGAAAGCCACGGCTAACTACGTG

>3964 len=160 tot-seq=2

TAGGGAATCTTCGGCAATGGGGGAAAGCCTGATCCAGCCATGCCGCGTGTGTGAAGAAGG  
TCTTCGGATTGTAAAGCACTTTAAGTTGGGAGGAAGGGCAGTTACCTAATACGTGATTGT  
TTTGACGTTACCGACAGAATAAGCACCGGCTAACTCTGTG

>3965 len=160 tot-seq=2

TGGGGAATATTGCGCAATGGGGGAAACCCTGACGCAGCGACGCCGCGTGCGGGATGAAGG  
GTTTCGGCTCGTAAACTCTGTTGTTGGAGAAGAACGTGCGTAAGAGTAACTGTTTACGC  
AGTGACGGTATCCAACCAGAAGGTCACGGCTAACTACGTG

>3966 len=160 tot-seq=2

TAGGGAATTTTCGTCAATGGGGGGAACCCTGAACGAGCAATGCCGCGTGAGTGAAGAAGG  
TCTTCGGATCGTAAAGCTCTGTTGTAAGAGAAAAACGGGTATCATAGGGAATGATGATAT  
CGTGATGGTATCTTACCAGAAAGCCACGGCTAACTACGTG

>3967 len=160 tot-seq=2

TGGGGAATATTGGACAATGGAGGGAACCTGATCCAGCAATTCTGCGTGTGTGAAGAAGG

TCTTCGGATTGTAAAGCACTTTAAGTTGGGAGGAAGGGCAGTTACCTAATACGTGATTGT  
TTTGACGTTACCGACAGAATAAGCACCGGCTAACTCTGTG

>3968 len=160 tot-seq=2

TAGGGAATCTTCGGCAATGGGGGAACCCCTGACCGAGCAACGCCGCGTGCGGGATGAAGG  
CCTTCGGGTTGTAAACCGCTTTTGTGAGAGACGAAAAGGGACGTACGAATAATACGTTCC  
GCTGACGGTATCTGAAGAATAAGCACCGGCTAACTACGTG

>3969 len=160 tot-seq=2

TAGGGAATCTTCGGCAATGGGGGAACCCCTGACCGAGCAACGCCGCGTGAGTGAAGAAGG  
TTTTCGGATCGTAAAGCTCTGTTATTAGGGAAGAACAATGTGTAAGTAACTATGCACGT  
CTTGACGGTACCTAATCAGAAAGCCACGGCTAACTACGTG

>3970 len=160 tot-seq=2

TGGGGAATTTTGCACAATGGGGGAAACCCCTGATGCAGCGACGCCGCGTGATTTAGAAGGC  
CTTCGGGTTGTAAAGCTCTGTTAATCGGGACGAATGGTCGGTGTGCAAATAGTCATGGA  
CATGACGGTACCGGAATAGAAAGCCACGGCTAACTACGTG

>3971 len=160 tot-seq=2

TGGGGGATATTGGACAATGGGGGAAACCCCTGATCCAGCGACGCCGCGTGAATGAAGAAGG  
CCTTAGGGTTGTAAAGTCTTTTCGGTATTGAGGAAGGTTGATGTGTTAATAGCACATCAA  
ATTGACGTTAAATACAGAAGAAGCACCGGCTAACTCCGTG

>3972 len=160 tot-seq=2

TGGGGAATATTGCACAATGGGCGAAAGCCTGATGCAGCGACGCCGCGTGAGCGAAGAAGT  
ATTTCCGGTATGTAAACTCTGTCCTCATCCAAGAGAAGGGAAGGTAGTAACTGACCTTTC  
CAGGACGGTAGATGAGGAGGAAGCCCCGGCTAACTATGTG

>3973 len=160 tot-seq=2

TGGGGAATATTGCGCAATGGGCGAAAGCCTGACGCAGCGACGCCGCGTGAGGGATGAAGG  
TTTTCGGATCGTAAACCTCTGTGAGAAGGGAAGAAGTTGCATGGGGCCAATCACCTGTGC  
ATTGACGGTACCTTCAAAGGAAGCACCGGCTAACTCCGTG

>3974 len=160 tot-seq=2

CAGGGAATCTTCGCAATGGACGAAAGTCTGACGGAGCAACGCCGCGTGAGTGATGAAGG  
TTTTCGGATCGTAAACTCTGTTATTAGGGAAGAACAATGTGTAAGTAACTGTGCACAT

CTTGACGGTACCTAATCAGAAAGCCGCGGCTAACTACGTG

>3975 len=160 tot-seq=2

TGGGGAATATTGCACAATGGGGGAAACCCTGATGCAGCAACGCCGCGTGAGTGATGAAGG

TTTTCGGATCGTAAAGCTCTGTTGTTAGGGAAGAACGTGCGTGAGAGCAACTGTTACGC

AGTGACGGTATCTAACCAGAAAGTCACGGCTAACTACGTG

>3976 len=160 tot-seq=2

TGGGGAATTTTGGACAATGGGCGAAAGCCTGATCCAGCAATGCCGCGTGAGTGATGAAGG

TCTTCGGATCGTAAACTCTGTTATTAGGGAGGAACATATGTGTAAGTAACTGTGCACAT

CTTGACGGTACCTAATCAGAAAGCCACGGCTAACTACGTG

>3977 len=160 tot-seq=2

TGGGGAATATTGGACAATGGGCGCAAGCCTGATCCAGCCATACCGCGTGGGTGAAGAAGG

TCTTCGGATCGTAAACTCTGTTATTAGGGGAAGAACATATGTGTAAGTAACTGTGCACAT

CTTGACGGTACCTAATCAGAAAGCCACGGCTAACTACGTG

>3978 len=160 tot-seq=2

TAGGGAATCTTCGGCAATGGACGGAAGTCTGACCGAGCAACGCCGCGTGAGTGATGAAGG

TCTTCGGATCGTAAACTCTGTTATTAGGGGAAGAACATATGTGTAAGTAACTGTGTACAT

CTTGACAGTACCTAATCAGAAAGCCACGGCTAACTACGTG

>3979 len=160 tot-seq=2

TAGGGAATCTTCGCAATGGGCGAAAGCCTGACGGAGCAACGCCGCGTGAGTGATGAAGG

TCTTCGGATCGTAAACTCTGTTGGTAGTGAAGAAAGATAGAGGTAGTAACTGGCCTTTA

TTTGACGGTAATTAATTAGAAAGTCACGGCTAACTACGTG

>3980 len=160 tot-seq=2

TGAGGAATTTTTACAATGGACGAAAGTCTGATGGAGCAATACCACGTGAGTGATGAAGG

TCTTCGGATCGTAAACTCTGTTATTAGGGGAAGAACATATGTGTAAGTAACTGTGCACAT

CTTGACGGTACCTAATCAGAAAGCCACGGCTAACTACGTG

>3981 len=160 tot-seq=2

TGGGGAATCTTCGCAATGGACGGAAGCCTGACCGAGCAACGCCGCGTCAGTGAAGAAGG

GTTTCGGCTCGTAAAGCTCTGTTGTTGGTGAAGAAGGACAGGGGTAGTAACTGACCTTTG

TTTGACGGTAATCAATTAGAAAGTCACGGCTAACTACGTG

>3982 len=160 tot-seq=2

TAGGGAATTTTCGGCAATGGGGGAAACCCTGACCGAGCAACGCCGCGTGAGGGAGGAAGT  
ATTCGGTATGTAAACCTCTGTTATAAAGGAAGAACGGCATATGCAGGGAATGGCATATG  
AGTGACGGTACTTTATGAGGAAGCCACGGCTAACTACGTG

>3983 len=160 tot-seq=2

TGGGGAATATTGGACAATGGGCGAAAGCCTGATCCAGCCATGCCGCGTGTGTGAAGAAGG  
TCTTCGGATTGTAAAGCACTTTAAGTTGGGAGGAAGGGTTGAAGCTAATACCTTCAATC  
TTTGACGTTACCAACAGAATAAGCACCGGCTAACTCTGTG

>3984 len=160 tot-seq=2

TAGGGAATCTTCCGCAATGGACGCAAGTCTGACGGAGCAACGCCGCGTGAGTGAAGAAGG  
TCTTCGGATCGTAAAGCTCTGTTGTTAGAGAAGAACAGCGCATAGAGTAACTGTTATGCG  
TGTGACGGTATCCAACCAGAAAGCCACGGCTAACTACGTG

>3985 len=160 tot-seq=2

TGGGGAATATTGCGCAATGGGGGAAACCCTGATGGAGCAACGCCGCGTGAATGAAGAAGG  
CCTTCGGGTCGTAAAATTCTGTTGTGAGAGAAGAACGTGCGTGAGAGTAACTGTTACAGT  
ATTGACGGTATCTGACCAGAAAGCCACGGCTAACTACGTG

>3986 len=160 tot-seq=2

TGGGGAATATTGCGCAATGGGGGAAACCCTGAACGAGCAATGCCGCGTGAGTGAAGAAGG  
TCTTCGGATCGTAAAGCTCTGTTGTAAGAGAAAAACGACATTCATAGGGAATGATGAGTG  
AGTGATGGTATCTTACCAGAAAGTCACGGCTAACTACGTG

>3987 len=160 tot-seq=2

TTAAGAATATTTTCGCAATGGACGAAAGTCTGACGGAGCGACGCCGCGTGGATGAAGAATG  
CCGAAAGGTTGTAAAATCCTTTAAGCCTGAGGAATAAGCACAGTAGGGAATGATTGTGC  
GGTGACAGTAGGGCTTGAATAAGCACCGGCTAATTACGTG

>3988 len=160 tot-seq=2

TAGGGAATCTTCCACAATGGACGCAAGTCTGATGGAGCAACGCCGCGTGAGTGAGGAAGG  
CCTTCGGGTCGTAAAGCTCTGTTGCCAGGGAAGAACGCCAAGGAGAGTAACTGCTCTTTG  
GGTGACGGTACCTGAGAAGAAAGCCCCGGCTAACTACGTG

>3989 len=160 tot-seq=2

TGGGGAATCTTCGCAATGGACGAAAGTCTGACGGGGCAACGCCGCGTGAGTGAAGACGG  
CCTTCGGGTTGTAAAGCTCTGTGATTCGGGACGAAAAGCCGTATGTAAATAATATATGGA  
AATGACGGTACCGAAAAAGCAAGCCACGGCTAACTACGTG

>3990 len=160 tot-seq=2

TGGGGAATATTGCGCAATGGGGGAAACCCTGACGCAGCGACGCCGCGTGCGGGATGAAGG  
CCTTCGGGTTGTAAAGCACTTTAAGTTGGGAGGAAGGGCAGTAAATTAATACTTTGCTGT  
TTTGACGTTACCGACAGAATAAGCACCGGCTAACTCTGTG

>3991 len=160 tot-seq=2

GACCAGCGTATCCCATTGTTCTGACCTGCATTTCAAGTGCAACTTCCAACCTAGCACGGTC  
CAATTTTGTCAACGGTAAGACGTCCTCCTCCACACACGCAGGTGAACAGAGTATGGGCTC  
CAAAAAGCAATTCCATTTACTGGAAGAACCAGATCATGAT

>3992 len=160 tot-seq=2

TGAGGAATATTGGTCAATGGGCGAGAGCCTGAACCAGCCAAGTAGCGTGCAGGATGAAGG  
TCTTCGGATTGTAAACTGCTTTTGTGAGGGAAGAAAAGGTCTGTGTTAATACCATAGACT  
GCTGACGGTACCTGAAGAATAAGCACCGGCTAACTACGTG

>3993 len=160 tot-seq=2

TGGGGAATCTTGACAATGGGCGAAAGCCTGATGCAGCGACGCCGCGTGCGGGATGAAGG  
GTTTCGGCTCGTAAAGCTCTGTTGGTAGTGAAGAAAGATAGAGGTAGTAACTGGCCTTTA  
TTTGACGGTAATTACTTAGAAAAGTCACGGCTAACTACGTG

>3994 len=160 tot-seq=2

TAGGGAATCTTCCACAATGGGCGCAAGCCTGATCCAGCCATGCCGCGTGTGTGAAGAAGG  
TCTTCGGATTGTAAAGCACTTTAAGTTGGGAGGAAGGGTTGTAGATTAATACTCTGCAAT  
TTTGACGTTACCGACAGAATAAGCACCGGCTAACTCTGTG

>3995 len=160 tot-seq=2

TGGGGAATATTGACAATGGACGCAAGTCTGATGGAGCAACGCCGCGTGAGTGAAGAAGG  
GTTTCGGCTCGTAAAGCTCTGTTGTTAAAGAAGAACGTGGGTGAGAGTAACTGTTACCC  
AGTGACGGTATTTAACCGAAAAGCCACGGCTAACTACGTG

>3996 len=160 tot-seq=2

TGAGGAATATTGGTCAATGGGCGAGAGCCTGAACCAGCCAAGTAGCGTGCACGATGAAGG



TCTTCGGATTGTAAAGTGCTGTTATAAGGGAAGAACATTTGCAATAGGAAATGATTGCAG  
ACTGACGATACCTTGTTCAGAAAGCGATGGCTAACTATGTG

>3997 len=160 tot-seq=2

TGGGGAATTTTGGACAATGGGCGCAAGCCTGATCCAGCCATGCCGCGTGCGAGAAGAAGG  
CCTTCGGGTTGTAAACCGCTTTTGTTCAGGGAAGAAAAGTTCCGGGCTAATACCCTGGGAC  
GATAACGGTACCTGAAGAATAAGCACCGGCTAACTACGTG

>3998 len=160 tot-seq=2

TGGGGAATATTGCACAATGGGCGCAAGCCTGATGCAGCCATGCCGCGTGTATGAAGAAGG  
CCCTAGGGTTGTAAAGTACTTTTCAGTCGGGAGGAAGGCGCTGATGCTAATATCATCAGCG  
ATTGACGTTACCGACAGAAGAAGCACCGGCTAACTCCGTG

>3999 len=160 tot-seq=2

TGGGGAATATTGGACAATGGGCGCAAGCCTGATCCAGCCATGCCGCGTGAGTGATGAAGG  
CCTTAGGGTTGTAAAGCTCTGTTGTTGGTGAAGAAGGATAGAGGTAGTAACTGGCCTTTA  
TTTGACGGTAATCAACCAGAAAGTCACGGCTAACTACGTG

>4000 len=160 tot-seq=2

TAGGGAATCTTCGGCAATGGGGGAAACCCTGACCGAGCAACGCCGCGTGAGTGAAGAAGG  
GTTTCGGCTCGTAAAGCTCTGTTGTTGGTGAAGAAGGACAGGGGTAGTAACTGACCTTTG  
TTTGACGGTAATCAATTAGAAAGTCACGGCTAACTACGTG

>4001 len=160 tot-seq=2

CTCCTTAATTGTCCAAGGGATGTGGGCTCCTGCTCCACCCTGGGGAATAAGAGGCATTCT  
TCGTGAGCACTGAATCCTCAGTGATCCTCAGAGCCTGGACTCCAGCTTAGGGCTCTCT  
GCCTGAGTCCCCTCCAGGCTGGATGCAGACATGAACACGC

>4002 len=160 tot-seq=2

TGGGGAATATTGCGCAATGGGGGAAACCCTGACGCAGCGACGCCGCGTGCGGGATGAAGG  
CCTTCGGGTTGTAAAGCACTTTTGTCCGGAAAGAAATCGCGCTGGTTAATACCTGGCGTG  
GATGACGGTACCGGAAGAATAAGCACCGGCTAACTACGTG

>4003 len=160 tot-seq=2

TGGGGAATATTGCACAATGGACGGAAGTTTGTATGCAGCGACGCCGCGTGTATGAAGAAGG  
CCTTCGGGTTGTAAAGTACTTTTCAGCGGGGAGGAAGGGAGTAAAGTTAATACCTTTGCTC

ATTGACGTTACCCGCAGAAGAAGCACCCGGCTAACTCCGTG

>4004 len=160 tot-seq=2

TGGGGAATATTGCACAATGGGGGAAACCCTGATGCAGCGACGCCGCGTGAGCGATGAAGG

CTTTCGGATCGTAAACTCTGTTGTTAGAGAAGAACAAGGACGTTAGTAACTGAACGTCC

CCTGACGGTATCTAACCAGAAAGCCACGGCTAACTACGTG

>4005 len=160 tot-seq=2

TAGAGAATTTTCGGCAATGGGCGAAAGCCTGACCGAGCAACGCCGCGTGAGGGAGGAAGT

CCTTCGGGATGTAAACCTCTGTTATAAAGGAAGAACGGTAACTGCAGGGAATGGCAGTTA

AGTGACGGTACTTTATGAGGAAGCCACGGCTAACTACGTG

>4006 len=160 tot-seq=2

TAGGGAATCTTCCACAATGGACGAAAGTCTGATGGAGCAACGCCGCGGAGCGATGAAGG

CCTTCGGGTCGTAAAGCTCTGTTGTTAGGGAAGAACAAGTATCGGAGTAACTGCCGGTAC

CTTGACGGTACCTAACCAGAAAGCCACGGCTAACTACGTG

>4007 len=160 tot-seq=2

TGGGGAATATTGCACAATGGGCGCAAGCCTGATGCAGCCATGCCGCGTGTATGAAGAAGG

CCTTCGGGTTGTAAAGTACTTACAGCGGGGAGGAAGGGATGGTGCTTAATACGCGCCGTC

ATTGACGTTACCCGCAGAAGAAGCACCCGGCTAACTCCGTG

>4008 len=160 tot-seq=2

TGGGGAATTTTGGACAATGGGCGCAAGCCTGATCCAGCCATTCCGCGTGAGTGAAGAAGG

CCTTCGGGTTGTAAAGCTCTTTCGCAAGGGAAGAAACTTACTTTCTAATAAAGAGTGAG

GCTGACGGTACCTTGATAAGAAGCACCCGGCTAACTACGTG

>4009 len=160 tot-seq=2

TGGGGAATATTGCGCAATGGGGGAAACCCTGACGCAGCGACGCCGCGTGCGGGATGAAGG

CCTTCGGGTTGTAAAGTTCTTTCGGTAATGAGGAAGGGATGTTGTTAAATAGATAGCATC

ATTGACGTTAATTACAGAAGAAGCACCCGGCTAACTCCGTG

>4010 len=160 tot-seq=2

GGGCTGTTCTGTGGCCCGTATTCCCATCACTGCATGTCCTGAGGTGTCCTGAGGTCCA

GAGTGCTCCCTTCTTCTGGAGCTCCCCCTGCCGGGCACCCTCCTTGTGGTGACTGTGGG

TCTGGATGGACCCTTGCTCCCCATCAGTCCTGTACAGCTC

>4011 len=160 tot-seq=2

TGGGGAATATTGCGCAATGGGGGAAACCCTGACGCAGCGACGCCGCGTGAGTGAAGAAGG  
TTTTCGGATCGTAAACTCTGTTGTTAGAGAAGAACAAGGATGAGAGTAACTGTTTCATCC  
CTTGACGGTATCTAACCAGAAAGCCACGGCTAACTACGTG

>4012 len=160 tot-seq=2

CAGCACAGCGACCACCTCCAACCTCCCAGAGGAGGGTGTGGACGTAGACACCAGTGGGG  
TCCCAGAACCTCAGGTGGGATGGTGAAGGAATGGGTGGGTCCCCTGAGGCCAGAGAGG  
GCGAGTGAGGACCCAGCATGGCCCAGCATGGCCCAGCTGG

>4013 len=160 tot-seq=2

TAGGGAATCTTCGGCAATGGGGGCAACCCTGACCGAGCAACGCCGCGTGAATGAAGAAGG  
CCTTCGGGTTGTAAAGTTCTTTCGGTAGCGAGGAAGGCATTTAGTTTAATAGACTAGGTG  
ATTGACGTTAACTACAGAAGAAGCACCGGCTAACTCCGTG

>4014 len=160 tot-seq=2

TAGGGAATCTTCGGCAATGGGGGCAACCCTGATCCAGCCATGCCGCGTGTCTGAAGAAGG  
CCTTCGGGTTGTAAAGGACTTTTGTTCAGGGAAGAAAAGGATAGGGTTAATACCCCTGTCT  
GATGACGGTACCTGAAGAATAAGCACCGGCTAACTACGTG

>4015 len=160 tot-seq=2

TAGGGAATCTTCACAATGGACGAAAGTCTGATCCAGCCATGCCGCGTGTGTGAAGAAGG  
TCTTCGGATTGTAAAGCACTTTAAGTTGGGAGGAAGGGCAGTAAGTTAATACCTTGCTGT  
TTTGACGTTACCAACAGAATAAGCACCGGCTAACTTCGTG

>4016 len=160 tot-seq=2

TGGGGAATTTTGGACAATGGGGGCAACCCTGATCCAGCCATGCCGCGTGCGGGAAGAAGG  
CCTTCGGGTTGTAAACCGCTTTTGGTCGGGAAGAAAAGGTTATCCCTAATAAGGATGACT  
CTTGACGGTACCGGCAGAATAAGCACCGGCTAACTACGTG

>4017 len=160 tot-seq=2

TGGGGAATTTTTCGCAATGGACGAAAGTCTGACGCAGCAACGCCGCGTGGGTGATGAAGG  
TCTTCGGACTGTAAACCCCTGTCGTCAGGGACGAAGGTGGCGGAGTTAATAACTCCGTTG  
CTTGACGGTACCTGGAGAGGAAGCCCCGGCTAACTCTGTG

>4018 len=160 tot-seq=2

TAGGGAATCTTCGGCAATGGGGGCAACCCTGACCGAGCAACGCCGCGTGAGTGAAGAAGG  
TCTTCGGATTGTAAAGCACTTTAAGTTGGGAGGAAGGGTTGTAGATTAATACTCTGCAAT  
TTTGACGTTACCGACAGAATAAGCACCGGCTAACTCTGTG

>4019 len=160 tot-seq=2

TAGGGAATATTGGACAATGGGCGAAAGCCTGATCCAGCAACGCCGCGTGGGTGACGAAGG  
CCTTCGGGTCGTAAAGCCCTGTGGGGAGGAGCGAATGGCTCCGGCCTAACACGTCGGGGA  
GTTGACGGTACCTCCTTAGCAAGCACCGGCTAACCACGTG

>4020 len=160 tot-seq=2

TAGGGAATATTGGACAATGGGCGCAAGCCTGATCCAGCCATGCCGCGTGAGTGAAGAAGG  
CCTTCGGGTTGTAAAGCTCTTTTGTCCGGAAAGAAAAGCCTTGGGTTAATACCCTGAGGT  
TCTGACGGTACCGGAAGAATAAGCACCGGCTAACTTCGTG

>4021 len=160 tot-seq=2

TGAGGAATATTGGTCAATGGACGAGAGTCTGAACCAGCCAAGTAGCGTGCAGGATGACGG  
CCTTCGGGTTGTAAAGCTCTGTGATTCGGGACGAAAGGCCATATGTGAATAATATATGGA  
AATGACGGTACCGAAAAAGCAAGCCACGGCTAACTACGTG

>4022 len=161 tot-seq=2

TAGGGAATATTGCGCAATGGACGAAAGTCTGACGCAGCCACGCCGCGTGAGTGAAGAAGG  
CCTTCGGGTTGTAAAGCTCTGTCAACTGGGAAAAACGATTATCCGGGGAAAAGTTCGGGTA  
ATGTGATGGTACCAGTGGAGGAAGCACCGGCAAACCTCTGTG

>4023 len=161 tot-seq=2

TCGAGAATCATTACAATGGGGGCAACCCTGATGGTGCGACGCCGCGTGGGGGAATGAAG  
GTCTTCGGATTGTAAACTCTGTTATTAGGGAAGAACAATGTGTAAGTAACTATGCACG  
TCTTGACGGTACCTAATCAGAAAGCCACGGCTAACTACGTG

>4024 len=161 tot-seq=2

TGGGGAATTTTGGACAATGGGCGCAAGCCTGATCCAGCAATGCCGCGTGTGTGAAGAAGG  
TTTTCGGATCGTAAAGCTCTGTTGTAAGTCAAGAACGAGTGTGAGAGTGAAAAGTTCACA  
CTGTGACGGTAGCTTACCAGAAAGGGACGGCTAACTACGTG

>4025 len=161 tot-seq=2

TGGGGAATATTGGACAATGGGGGGAACCCTGATCCAGCCATGCCGCGTGTGTGAAGAAGG

CCTTATGGTTGTAAAGCACTTTAAGCGAGGAGGAGGCTCCCGTAGCTAATATCTACGGAG  
AGTGGACGTTACTCGCAGAATAAGCACCGGCTAACTCTGTG

>4026 len=161 tot-seq=2

TAGGGAATCTTCGGCAATGGACGGAAGTCTGACCGAGCAACGCCGCGTGAGTGAAGAAGG  
TTTTCGGATCGTAAAGCTCTGTTGTAAGAGAAGAACGAGTGTGAGAGTGGAAAGTTCACA  
CTGTGACGGTAATCAATTAGAAAAGTCACGGCTAATTACGTG

>4027 len=161 tot-seq=2

TGGGGAATCTTCGCAATGGGCGAAAGCCTGACGGAGCAACGCCGCGTGAGTGAAGACGG  
CCTTCGGGTTGTAAACTCTGTTATACGGGACGAAAAGGCGGATGCCAACAGTATCCGT  
CCGTGACGGTACCGTAAGAGAAAGCCACGGCTAACTACGTG

>4028 len=161 tot-seq=2

TGGGGAATCTTCGCAATGGGCGAAAGCCTGACGGAGCAATGCCGCGTGAGTGAAGAAGG  
CCTTCGGGTTGTAAACTCTGTTGTTAGAGAAGAACGTTGGTAGGAGTGGAAAATCTACC  
AAGTGACGGTAACTAACCAGAAAGGGACGGCTAACTACGTG

>4029 len=161 tot-seq=2

TGGGGAATATTGCACAATGGGGGAAACCCTGATGCAGCGACGCCGCGTGAGCGAAGAAGT  
ATTCGGTATGTAAAGCTCTGTTGTTAGAGAAGAACGTTGGTAGGAGTGGAAAATCTACC  
AAGTGACGGTAACTAACCAGAAAGGGACGGCTAACTACGTG

>4030 len=161 tot-seq=2

TGGGGAATCTTGCACAATGGGGGGAACCCTGACGCAGCGACGCCGCGTGCGGGACGGAGG  
CCTTCGGGTCGTAAAGCTCTGTTGTTAGAGAAGAACGTTGGTAGGAGTGGAAAATCTACC  
AAGTGACGGTAACTAACCAGAAAGGGACGGCTAACTACGTG

>4031 len=161 tot-seq=2

TAGGGAATCTTCCACAATGGGCGAAAGCCTGATGGAGCAACGCCGCGTGGGTGAAGAAGG  
TCTTCGGATCGTAAACCCTGTTGTTAGAGAAGAACGAGTGTGAGAATGGAAAGTTCATG  
CTGTGACGGTACTTAACCAGAAAGGGACGGCTAACTACGTG

>4032 len=161 tot-seq=2

TAGGGAATATTGCACAATGGAGGAAACTCTGATGCAGCCATGCCGCGTGTGTGAAGAAGG  
CCTTCGGGTTGTAAAGCTCTGTGATCCGGGACGAAAGAGCCTTGGGTAAATAGCCTAAGG

AAGTGACGGTACCGGAAAAGCAAGCCACGGCTAACTACGTG

>4033 len=161 tot-seq=2

TAGGGAATCTTCCGCAATGGACGCAAGTCTGACGGAGCAACGCCGCGTGAGTGAAGACGG  
CCTTCGGGTTGTAAAGCTCTGTGATTCGGGACGAATGGTCGGTGTGCAAATAGTGCATGG  
ACATGACGGTACCGGAATAGAAAGCCACGGCTAACTACGTG

>4034 len=161 tot-seq=2

TGGGGAATCTTCCGCGATGGACGAAAGTCTGACGGAGCAACGCCGCGTGAGTGATGACGG  
TCTTCGGATTGTAAAGCTCTGTTAATCGGGACGAATGGTCGGTGTGCAAATAGTGCATGG  
ACATGACGGTATCTTACCAGAAAGCCACGGCTAACTACGTG

>4035 len=161 tot-seq=2

TGGGGAATATTGCACAATGGGCGCAAGCCTGATGCAGCCATGCTGCGTGAGTGAAGAAGG  
TTTTCGGATCGTAAAGCTCTGTTGTAAGAGAAGAACGTGCGTGAGAGTGGAAAGTTCACA  
CAGTGACGGTAACTTACCAGAAAGGGACGGCTAACTACGTG

>4036 len=161 tot-seq=2

TTAGGAATATTCGTCAATGGGGGAAACCCTGAACGAGCAATGCCGCGTGAACGATGACGG  
TCCTCTGGATTGTAAAGTTCTGTTGTTTGGAAAGAATAGCTTCGATAGGAAATGATCGAA  
GTTTGACGGTACCATTCAAGAAAGCCACGGCTAACTACGTG

>4037 len=161 tot-seq=2

TAGGGAATCTTCCACAATGGACGCAAGTCTGACCGAGCAACGCCGCGTGAGTGAAGAAGG  
TTTTCGGATCGTAAAGCTCTGTTGTAAGAGAAGAACAGGTGTGAGAGTGGAAAGTTCACA  
CTGTGACGGTATCTTACCAGAAAGGGACGGCTAACTACGTG

>4038 len=161 tot-seq=2

TAGGGAATTTTCCGCAATGGGCGAAAGCCTGACGGAGCAACGCCGCGTGAGTGAGGACGG  
CCTTCGGGTTGTAAACTCTGTTCTTGAGGAAGAATTCCTTCCAGGCGAACAGCCTGGAA  
GGTTGACGGTACTCAAGGAGAAAGCCCCGGCTAACTACGTG

>4039 len=161 tot-seq=2

TGGGGAATTTTTCGCAATGGGCGAAAGCCTGACGGAGCAACGCCGCGTGAGTGATGACGG  
CCTTCGGGTTGTAAAGCTCTGTGATCGGGGACGAACGGTCCGTAAGCTAATACCTTATGG  
AAGTGACGGTACCCGAATAGCAAGCCACGGCTAACTACGTG

>4040 len=161 tot-seq=2

TTAGGGATATTCGTCAATGGGGGAAACCTTGAACGAGCAATGCCGCGTGAGTGATGACAG  
TTCTTTGGATTGTAAACTCTGTTGTTAGGGAAGAACGACTCGTGTAGGAAATGACACGG  
GAGTGACTGTACCTTTCAAGAAGGCTCCGGCTAACTACGTG

>4041 len=161 tot-seq=2

TGGGGAATTGTCGCAATGGGCGCAAGCCTGACGACGCAACGCCGCGTGAGGATGAAGA  
CCTTCGGGTCGTAAACTCCTTCGATCGAGACGAATTCCTTCGGGGTGAACAATCCCGGA  
GGTTGACGGTACCGAGAGAAGAAGCCCCGGCTAACTCCGTG

>4042 len=161 tot-seq=2

TGAGGAATATTGGTCAATGGGCGAGAGCCTGAACCAGCCAAGTAGCGTGCAGGATGACGG  
CCCTATGGGTTGTAAACTGCTTTTATATGGGAAGAAACGCTAAAATAGGAAATGATTTTA  
GTTTGACTGTACCATTTGAATAAGTATCGGCTAACTATGTG

>4043 len=161 tot-seq=2

TGGGGAATATTGCACAATGGGGGAAACCCTGATGCAGCGACGCCGCGTGAACGAAGAAGG  
TATTCGTATCGTAAAGTTCTGTCTAAGAGAAGAACGAGTGTGAGAGTGGAAGTTCACA  
CTGTGACGGTATCTTACCAGAAAGGGACGGCTAACTACGTG

>4044 len=161 tot-seq=2

TGGGGAATCTTGCACAATGGGCGAAAGCCTGATGCAGCGACGCCGCGTGCGGGATGAAGG  
TTTTCGGATCGTAAAGCTCTGTTGTAAGAGAAGAACGAGTGTGAGAGTGGAAGTTCACA  
CTGTGACGGTATCTTACCAGAAAGGGACGGCTAACTACGTG

>4045 len=161 tot-seq=2

TGGGGAATATTGGACAATGGAGGCAACTCTGATCCAGCAATTCTGTGTGTGTGAAGAAGG  
TTTTAGGACTGTAAAGCTCTGTTGTTAGAGAAGAACGTTGGTAGGAGTGGAATCTACC  
AAGTGACGGTAACTAACCAGAAAGGGACGGCTAACTACGTG

>4046 len=161 tot-seq=2

TTAGGAATATTCGGCAATGGGGGAAACCCTGACCGAGCAATGCCGCGTGTGAGATGAAGG  
TCCTCTGGATTGTAAATCACTTTTATTTGGGAAGAATTGTAAGTAGAGGAAATGTTACTT  
ACTTGACGGTACCTTTTGAATAAGCCCCGGCTAACTACGTG

>4047 len=161 tot-seq=2

TCAAGAATCATTACAATGGGGGAAACCCTGATGGTGCGACGCCGCGTGAGTGAAGAAGG  
TTTTCGGATCGTAAAGCTCTGTTGTAAGTCAAGAACGAGTGTGAGAGTGAAAAGTTCACA  
CTGTGACGGTAGCTTACCAGAAAGGGACGGCTAACTACGTG

>4048 len=161 tot-seq=2

TAGGGAATCTTCGGCAATGGGGGAAACCCTGACGGAGCAACGCCGCGTGAGTGAAGACGG  
CCTTCGGGTTGTAAAGCTCTGTGATCCGGGACGAAAGAGCCTGAGGTAAATAGCCTAAGG  
AAGTGACGGTACCGGAAAAGCAAGCCACGGCTAACTACGTG

>4049 len=161 tot-seq=2

TGGGGAATTTTGGACAATGGGGGAAACCCTGATCCAGCCATGCCGCGTGCGGGATGAAGG  
CCTTCGGATCGTAAAGCTCTGTTGTTAAGGAAGAACGAGTGTGAGAATGAAAAGTTCATG  
CTGTGACGGTACTTAACCAGAAAGGGACGGCTAACTACGTG

>4050 len=161 tot-seq=2

TGGGGAATATTGCACAATGGGGGAAACCCTGATGCAGCGACGCCGCGTGAACGAAGAAGG  
TATTCGTATCGTAAAGCTCTGTTGTTAAGGAAGAACGAGTGTGAGAATGAAAAGTTCATG  
CTGTGACGGTACTTAACCAGAAAGGGACGGCTAACTACGTG

>4051 len=161 tot-seq=2

TGGGGAATCTTCGCAATGGACGAAAGTCTGACGGAGCAACGCCGCGTGAACGAAGAAGG  
TTTTCGGATCGTAAAGCTCTGTTGTTAGAGAAGAACGTTGGTAGGAGTGAAAATCTACC  
AAGTGACGGTAACTAACCAGAAAGGGACGGCTAACTACGTG

>4052 len=161 tot-seq=2

TGGGGAATATTGCACAATGGGCGCAAGCCTGATGCAGCAACGCCGCGTGAACGATGACGG  
CCTTCGGGTTGTAAAGTTCTGTTATACGGGACGAATGGCGCAACGGTCAATACCCGTTGC  
GAGTGACGGTACCGTAAGAGAAAGCCACGGCTAACTACGTG

>4053 len=161 tot-seq=2

TTAGGAATATTCGTCAATGGGGGAAACCCTGAACGAGCAATGCCGCGTGAGTGATGAAGG  
CCCTATGGGTTGTAAAACCTCTGTTGTAAGGAAGAATACCTAGTATAGGAAATGATGCTA  
GGATGACGGTACTTTACCAGAAAGCCCCGGCTAACTACGTG

>4054 len=161 tot-seq=2

TGGGGAATCTTCGCAATGGGCGCAAGCCTGACGGAGCAACGCCGCGTGAGTGAAGAAGG



CCTTCGGGTCGTAAAGCTCTGTTGTCGGGGACGAATGTTACTGCTTAAAATATAGGTAGT  
AAATGACGGTACCTGACGAGGAAGCCACGGCTAACTACGTG

>4055 len=161 tot-seq=2

TGGGGAATATTGCGCAATGGGGGAAACCCTGACGGAGCAACGCCGCGTGAGTGAAGAAGG  
GTTTCGACTCGTAAAGCTCTGTTGTCGGGGACGAACGTGGAGACGGCGAATAGCCGTTTC  
CAATGACGGTACCTGACGAGGAAGCCACGGCTAACTACGTG

>4056 len=161 tot-seq=2

TTAGGAATATTGTCGAATGGGGGAAACCCTGAACGAGCAATGCCGCGTGAGTGATGAAGG  
CCCTATGGGTTGTAAGCTCTGTTGTTAAGAAAGAATGGTAGAATTAGGAAATGAGTTCT  
ACTTGACGGTACTTTTCAAGAAAGCCACGACTAACTACGTG

>4057 len=161 tot-seq=2

TGGGGAATATTGGACAATGGGGGAAACCCTGATCCAGCGACGCCGCGTGAGTGAAGAAGG  
TTTTCGGATCGTAAAGCTCTGTTGTAAGTCAAGAACGAGTGTGAGAGTGGAAAGTTCACA  
CTGTGACGGTAGCTTACCAGAAAGGGACGGCTAACTACGTG

>4058 len=161 tot-seq=2

TAGGGAATATTCCACAATGAGCGAAAGCTTGATGGAGCGACGCAGCGTGCACGATGAAGG  
TCTTATGGATTGTAAAGTGTCTGTTGCAAGGGAAGAAAAGGTAGTTGAGGAAATGCCTCTA  
CATTGACGGTACCTTGTTAGAAAGCGATGGCTAACTATGTG

>4059 len=161 tot-seq=2

TAGGGAGTCTTCCGCAATGGGCGAAAGCCTGACGGAGCAACGCCGCGTGAGTGATGAAGG  
TTTTCGGATCGTAAAGCTCTGTTGTTAGAGAAGAACAAGTGCCGTTTGAATAAGGCGGTA  
CCATGACGGTACCTAACGAGAAAGCCCCGGCTAACTACGTG

>4060 len=161 tot-seq=2

TGGGGAATATTGCGCAATGGGGGAAACCCTGACGGAGCAACGCCGCGTGAGTGATGACGG  
CCTTCGGGTTGTAAAGCTCTGTTAATCGGGACGAAAGGCCTTCTTGCGAATAGTGAGAAG  
GATTGACGGTACCGGAATAGAAAGCCACGGCTAACTACGTG

>4061 len=161 tot-seq=2

TAGGGAATTTTTACAATGGGCGCAAGTCTTATGAAGCAATGCCGCGTGAACGATGAAGG  
TCTTATAGATTGTAAAGTTCTTTTATATGGGAAGAAACGCTAAGATAGGAAATGATTTTA

GTTTGACTGTACCTTTTGAATAAGCGCCGGCTAACTACGTG

>4062 len=161 tot-seq=2

TGGGGAATATTGCGCAATGGGGGAAACCCTGACGCAGCGACGCCGCGTGCGGGATGAAGG

TCTTCGGATTGTAAACTCTGTTGTCAGGGACGAATGTAAGTATTACAATACTTCGG

TATTGACGGTACCTGACGAGGAAGCCACGGCTAACTACGTG

>4063 len=161 tot-seq=2

TGGGGAATCTTCGCAATGGGCGCAAGCCTGACGGAGCAACGCCGCGTGAACGATGACGG

CCTTCGGGTTGTAAAGTTCTGTTATATGGGACGAACAGGACATCGGTCAATACCCGGTGT

CTTTGACGGTACCGTAAGAGAAAGCCACGGCTAACTACGTG

>4064 len=161 tot-seq=2

TGGGGAATATTGCACAATGGGCGCAAGCCTGATGCAGCGACGCCGCGTGAGCGATGAAGG

TCTTCGGATTGTAAACTCTGTTGTCAGGGACGAATGTAAGTATTATAATACTTCGG

TATTGACGGTACCTGACGAGGAAGCCACGGCTAACTACGTG

>4065 len=161 tot-seq=2

TGGGGAATCTTCGCAATGGACGAAAGTCTGACGGAGCAGCGCCGCGTGAGTGATGAAGG

TCTTCGGGTTGTAAACTCTGTTGTCAGGGACGAATGTAAGTATTATAATACTTCGG

TATCGACGGTACCTGACGAGGAAGCCACGGCTAACTACGTG

>4066 len=161 tot-seq=2

TGAGGAATATTGGTCAATGGACGGAAGTCTGACGGAGCAACGCCGCGTGAACGATGACGG

CCTTCGGGTTGTAAAGTTCTGTTATACGGGACGAATGGCGTAGCGGTCAATACCCGTTAC

GAGTGACGGTACCGTAAGAGAAAGCCACGGCTAACTACGTG

>4067 len=161 tot-seq=2

TGGGGAATCTTCGCAATGGGCGAAAGCCTGACGGAGCAACGCCGCGTGAGTGAAGACGG

CCTTCGGGTTGTAAAGCTCTGTTATACGGGACGAATGGCAAGGTGGTAAATAGCCATCAT

GAGTGACGGTACCGTAAGAGAAAGCCACGGCTAACTACGTG

>4068 len=161 tot-seq=2

TGGGGAATCTTCGCAATGGGCGAAAGCCTGACGGAGCAACGCCGCGTGAGTGAAGACGG

CCTTCGGGTTGTAAAGCTCTGTTATAGGGGACGAACGGCCGGGTAGCGAAGAGGTAGCCG

GCATGACGGTACCGTAAGAGAAAGCCACGGCTAACTACGTG

>4069 len=161 tot-seq=2

TGGGGAATCTCCGCAATGGGCGCAAGCCTGACGGAGCAACGCCGCGTGAGTGAAGAAGG  
TCTTCGGATCGTAAAGCTCTGTTGACGGGGACGAACGTGCGGAGTGCGAATAGCGCTTTG  
TAATGACGGTACCTGTGCGAGGAAGCCACGGCTAACTACGTG

>4070 len=161 tot-seq=2

TAGGGAATCTCCACAATGGACGCAAGTCTGATGGAGCAACGCCGCGTGAGTGAAGACGG  
TCTTCGGATTGTAAAGCTCTGTTATACGGGACGAACGGCAAGGTGGTAAATAGCCATCAT  
GAGTGACGGTACCGTAAGAGAAAAGCCACGGCTAACTACGTG

>4071 len=161 tot-seq=2

TAGGGAATCTCCACAATGGGCGCAAGCCTGATGGAGCAACACCGCGTGAGTGAAGAAGG  
GTCTCGGCTCGTAAAGCTCTGTTGTTAGAGAAGAACAAGGATGAGAGTAGAATGTTTCATC  
CCTTGACGGTATCTAACCAGAAAAGCCACGGCTAACTACGTG

>4072 len=161 tot-seq=2

GCAGAAATTGAGGTGTGGAAGGAGAGAGTATTTCCATGACACAGAATAAAACACTCCAAT  
CAGCCTCCGGTCTGAGGTTACCTGCACCAAGAATTTCTCTGTTAGGGTTACACATAAC  
CTCCTCTAAGATCACTTAAGAATATTCTTCTTAGGAGAATC

>4073 len=161 tot-seq=2

CGGTGTCAATAATGCGGTAAGGCACTTCCACCTTAGCGAGCATCTTTGCTCCATTCCAA  
GCAACTTTTGATGTTCTGCGCGAGAATCTTCTGCTTGCAATAAACAAACATCTCTACTT  
TATCGAATTGATGCACGCGAATAATGCCAGAAGTATCTTTT

>4074 len=161 tot-seq=2

TGGGGAATATTGCGCAATGGGGGAAAGCCTGACGGAGCAACGCCGCGTGAGTGAAGACGG  
CCTTCGGGTTGTAAAGCTCTGTGATTCGGGACGAAAGATAAGTAGATGAATAATCTGCAT  
AAGTGACGGTACTGAAAAGCAAGCCACGGCTAACTACGTG

>4075 len=161 tot-seq=2

TGGGGAATATTGCACAATGGGGGAAACCCTGATGCAGCGACGCCGCGTGAGGAAGAAGG  
TCTTCGGATCGTAAACTCTGTTGGTAGAGAAGAACGTTGGTGAGAGTGGAAGCTCATC  
AAGTGACGGTAACTACCCAGAAAAGGGACGGCTAACTACGTG

>4076 len=161 tot-seq=2

TCACGCCACACTAAGGTCCAGGATGGAGAGAGAGAAAGAGAGAGGCTGATTGATCGACT  
GGGCTTTACTGCTCCTTCTCTGACTTCCGTGGGTTCCATTGTGCCTCTAAGAAAGCAGG  
ATTCAGCGGGCGTCAGTGCTGTGGGCTATATTTATACCCAT

>4077 len=161 tot-seq=2

TGAGGAATATTGGTCAATGGACGAGAGTCTGAACCAGCCAAGTAGCGTGAGTGAAGAAGG  
TCTTCGGATTGTAAACTCTGTTATACGGGACGAAAAAGGCGGATGCCAACAGTATCCGT  
CCGTGACGGTACCGTAAGAGAAAGCCACGGCTAACTACGTG

>4078 len=161 tot-seq=2

TGAGGAATATTGGTCAATGGGCGAGAGCCTGAACCAGCCAAGTCGCGTGAGTGAAGACGG  
TCTTCGGATTGTAAAGCTCTGTTATACGGGACGAACGGCAAGGTGGTAAATAGCCATCAT  
GAGTGACGGTACCGTAAGAGAAAGCCACGGCTAACTACGTG

>4079 len=161 tot-seq=2

TGGGGAATCTTCCACAATGGGCGAAAGCCTGATGGAGCAACGCCGCGTGAGTGAAGAAGG  
TCTTCGGATCGTAAAGCTCTGTTGCACGGGACGAAAAGTGGGTTTGAAAACATTGAACCT  
GGGTGACGGTACCGAGCGAGGAAGCCACGGCTAACTACGTG

>4080 len=161 tot-seq=2

AGCAGAGAACAAGAGTTGGGGTGGGGAAGGGGAGAGATGGGACCAGACATGGGAGGGCA  
AAGTGGAGAGAGAGCGCAATGAGAATGAGGCCAGAAGTGAGGAAGAGAAAACACCACAGT  
CAGTGACAATCCAAACAGTCCCAGCGCCGCGTAATAGGAAG

>4081 len=161 tot-seq=2

TGAGGAATATTGGTCAATGGACGAGAGTCTGAACCAGCCAAGTAGCGTGAGTGAAGAAGG  
TTTTCGGATCGTAAAGCTCTGTTGTAAGAGAAGAACGTGTGTAAGAGTGGAAGTTCACA  
CAGTGACGGTAACTTACCAGAAAGGGACGGCTAATTACGTG

>4082 len=161 tot-seq=2

TGGGGAATATTGGGCAATGGGCGCAAGCCTGACCCAGCAACGCCGCGTGAAGGAAGAAGG  
CTTTCGGATCGTAAAGCTCTGTTGTAAGAGAAGAACGTGTGTGAGAGTGGAAGTTCACA  
CAGTGACGGTAACTTACCAGAAAGGGACGGCTAACTACGTG

>4083 len=161 tot-seq=2

TAGGGAATTTTCGGCAATGGGCGAAAGCCTGACCGAGCAACGCCGCGTGAGTGAAGACGG

TCTTCGGATTGTAAAGCTCTGTTATACGGGACGAACGGCAAGGTGGTAAATAGCCATCAT  
GAGTGACGGTACCGTAAGAGAAAGCCACGGCTAACTACGTG

>4084 len=162 tot-seq=2

ACAGCGCTACAGACACAGCCAGGGCTGCTGAGCTATGCATGTGGCCCCCTGCCAACACAC  
CCTGTTTCGCAGAGAGGATGGCGACCCGCCTAAGGCTACATGGCAGAGACCAGGGGAGCT  
GAGGTTTGAACCCAGGGTCAGCTCCAGAGGTAGACTCCTGG

>4085 len=162 tot-seq=2

TGAGGAATATTGGTCAATGGGCGCTAGCCTGAACCAGCCAAGTAGCGTGAAGGATGAAGG  
CTCTATGGGTCGTAAAGCTCTGTTGTTAGAGAAGAACGTTGGTAGGAGTGGAAAATCTAC  
CAAGTGACGGTAACTAACCCAGAAAGGGACGGCTAACTACGTG

>4086 len=162 tot-seq=2

TGAGGAATATTGGTCAATGGGCGAGAGCCTGAACCAGCCAAGTAGCGTGCAGGATGACGG  
CCCTATGGGTTGTAAACTCTGTGATTCGGGACGAAAGATAAGTAGACGAATAATCTGCA  
TAAGTGACGGTACCGAAAAAGCAAGCCACGGCTAACTACGTG

>4087 len=162 tot-seq=2

TGAGGAATATTGGTCAATGGACGAGAGTCTGAACCAGCCAAGTAGCGTGCAGGATGACGG  
CCCTATGGGTTGTAAACTCTGTTATACGGGACGAATGTAGGCATGGTTAATACCCATGC  
GTAGTGACGGTACCGTAAGAGAAAGCCACGGCTAACTACGTG

>4088 len=162 tot-seq=2

GCTTAGAGGAGCGTGACCACACTTTGGGGGCTGCGTTCTTCATTAGCTGTGCTACGGTCA  
CCTGGGCTTTGGGGCACCTGTCTGGATGGGATGTTGCTCAACGGGAGGAAAGGAGCTACC  
TTCTTTGCCTCTTGTTTCAGGCACACCAGAGCTGAGCAACAC

>4089 len=163 tot-seq=2

GGATGGATGAGGGTGCCTGAGTTAGGCATTCTGGAGGGTGTGAGAAGCCAGGGAGACAGG  
AGAGTGGCAAGGAATTCTTGAGCAACCTCGCAGGCCGGCTGCATGCAGATTATGGTTTTG  
CCCCTCCCGTCTCAGCCTCTCTGGCAGCACCTCTCTGCACCCC

>4090 len=163 tot-seq=2

ACGGTGTACACCTGTTTCGCTGGCTGCTGAGCCACCCCCCCCCAAAGCCTGGCTAGCACT  
AGAGGTTTGGTTATGCTGGGTTTCATCATTGTTTCTGGTCGCACTTCTCAAGGCATTAA

TTGGTCTGTTGTGTTCCCCGCAGTGCTATAAAAAGTTCCAAGGA

>4091 len=163 tot-seq=2

GGACCCCTCCACCCTGGAAGGATTCCTTGCGGTAAGAGTTGACACATGTTTCAGTGTTTAG  
AGTTGTCTGATGGACAGGACCAAGAGGTTGTCTGCAGATGAGCTTTAGCATCAAGGACAT  
GACCAGTATTGATGCGGCTGAGAAGTTCATGGTTGCAATGTGA

>4092 len=163 tot-seq=2

TAGGGAATTTTTACAATGGGCGCAAGCCTTATGAAGCAATGCCGCGTGAACGATGAAGG  
TCTTATAGATTGTAAAGTTCTTTTATATGGGAAGAAACGCTAAGATAGGAAGAGCGTCGT  
GTAGGGAAAGAGTGTGCCAATGTGTAGATCTCGGTGGTCGCCG

>4093 len=163 tot-seq=2

CTGATGAAGCCCCGTGGGGACCAGGAAGGTCGGCCTAGGAGGAGCTTCAGGAGCCCCATC  
ACTCAATTCTGGCCATCCACACCTTGGAGCATCCGTAGGAATGCTGGAGCCCACCCTGGC  
TTCTCTCAGACAAGCAGCCAGTCTGGAATCCACTCAGCCTCCC

>4094 len=163 tot-seq=2

ACCCATCCAAATAAATAATATTCTTCAAAGCCTACCCCCTTAGAAAGCTCTGTGCTGA  
TTCCACTGGGGCTGTGTTTTCTCAGAACATTTTTGGAAAGTCCTATTGTGGAGCAGCCTT  
TGTCTCCAGAGAGTGTCCAGGATAAAGTTAATAAGCATCCAA

>4095 len=163 tot-seq=2

CCGCAAAACAACAACCAGCCAAATGTAATACTGCCATTGTGGGCTGATTTTGTCTTCAA  
AAACTGTTTTCCAAAAGTAAAGCCAGAATAAGTAAACTGCCGGAAAAGACATGGACAG  
GAAAATCTTCAAAGTGGTTCATTGCTGCCCTTTTCTTTCT

>4096 len=163 tot-seq=2

TATGTTGCATTGTTTCATGTGTGTCAGAGCCCTCTGCAGACCTGTTACTGTGTCCCCTGTGA  
GTCTAGTACTCAGGGAAGCCCTCCCTGGCAGTAGCACTTTGCCCTGGGGAAGGAGAAGGA  
GACGCAGCAATCTGTAGGTGTGGCGCCCGCATGTGGGTAAGAG

>4097 len=163 tot-seq=2

GTGGAGGATATGGCCGGGAGTATTGCTGAGTTTATAGGATTAAGGCCCCACTGGAGAG  
CTGCTGAGTTGATTGAATTCCTAGACCCCAGATGCCAAGGTAAATGCCACTGGGGCAGC  
TCTAGCACTTTTCAATAGTGCTGCCTGTGGCCCTGAGAGTGTG

>4098 len=164 tot-seq=2

CAACAACTAATGCGCAATTTGAAGAGGCGCGTGCGCAGCGGATAATACTTATGCCGAAA  
CTAGTAAGCAATATTGATCATAACGCCGCATTGTCTTATGAACTTACTGCTTTGTTGAAG  
AAAAAAATTTATAATGAGCATAACGTCTTCATCTCAACGCAAGAA

>4099 len=164 tot-seq=2

GGTGATGGGGCCTGGAAGCTGGGAGGGGTGCTGGACCTGCTGGGATGGGAGCAGGGGGAG  
AGCTGATTGTTTTGTCCCCTCTGAGTGCGAGAGTAATCTGTAACCCTTCCACAGCCTGT  
GATGCGGGCCTGGAGCTCTGCACTGAGCTGCACGTTCTCTGTGC

>4100 len=164 tot-seq=2

TGGGAATATTGCACAATGGGGGAAACCCTGATGCAGCGACGCCGCGTGAGTGATGAAGT  
ATTCGGTATGTAAAGCTCTATCAGCAGGGAAGAATAGGTCATCAGCCTTTGGCTGGTGA  
CATGAATGACGGTACCTGACTAAGAAGCTCCGGCTAAATACGTG

>4101 len=165 tot-seq=2

GATCAGATGTGGAGAGAGACAAGAGAGTCCCAGAGAGGACTGGAAAGAATGGAAGGAAGG  
AATGGAAATATACAACCTGCAGGAAGTGAAGGGAGTAGGGGGATCTCTAGGAAGTCCCAGA  
GACCTGGGATGGGGAAGGCACCCATGAGTCAATGCATGTAAGTGT

>4102 len=165 tot-seq=2

TAATATTTCACTCTGCCAATCTCAACCGCCTTTTGCCGAGCCTTTCCTGGGACAGAGG  
GCTCTGCGCAGGCGCCAGCAGCCCAGGGTTCCCGGGCCGCACGCGGCACTGGAGCAGGTA  
CCATGTGATTCCAGGGAGCGCCTCGTGCCCCAGTGACACACTTTT

>4103 len=165 tot-seq=2

CCGCCATTTCCAGCTTCTTCTTTCTGCTGTTCCAGTTGACCAGGCTCAAGCTCTGAGGT  
CACTGTAGAGTGACTGAGGTTTTGCAAGGCTTTTCTGCCTGGCAAACATGGACAGCACAC  
CATTCTCTAGGAGCTAGAGAGATGAAGACAACAGTCTCCGCCCT

>4104 len=165 tot-seq=2

CCCGCCTTCCAGGCCCCACCGGCTCGAAGTAGAGCGCAGCCCCGGCTGCACTTCTC  
TGCTGCAGCCATCGTCTTTGCAGCAGCCAGTCCAGATGAGTCGTCCTGCCATCACTGG  
ACATCAGACTCCAGGTTCCGGTAGCCTTTGGACTCTGAGATTTGCA

>4105 len=165 tot-seq=2

GAAGGGGCAATCAAAGGAGAGAGAAGGTGGCATTTCAGATTGGAAGGAGGGAAGAAG  
TGAGACCTGGGGATTACAGCCAGGGTAGGGGAGCTTTCAGGCAGAGAGAATGGCACAGG  
CAAAGGCCCTGAGGCAGGAGTGGCTGGAGTGGCCAGAGCGGAGAC

>4106 len=165 tot-seq=2

AACTAAGGTACACCCCTAAGCATGTACCATAAAATAAGGAGACAACCTGAGAGGTGAGATG  
CACAGGTGAAAAATGCCTTATACTCCCCTGAGCTGATGAGATTGCACGTATGGAGGAAA  
CTATCTTAGAGTAAGAGTACAGGATCCCAGTGAGGGGACCACCGC

>4107 len=165 tot-seq=2

CAATGTTCAATATCTAGGACAATACACAAAACCTCTTAAGAATGAGCACTAACCTTGTT  
GCATTAGAGATCTTTTGCCATTACCATACCAAGTGACTTCCATGGGACATTTATCCCTT  
CTCACTTAGCTTGCCACTGCTGCAGGTCTTTTGTCACTCCTCATC

>4108 len=166 tot-seq=2

CCAGCCACCAGAGCTCCCAGAGGAGAAAGGGTCCTTCTCCCCTTCAAGAGACAGCCCC  
AGAGTCCCAGTGGCCAGCCCTGAGGTTGTTCTGCTTAGGGCGTGGGGACACAGACTTA  
CCTCCGCCTTCGCTCCGCATGCCGATGGTGCCGCCAGTGTAATGG

>4109 len=166 tot-seq=2

TGGGGAGGGGGGAGAGAGAGAGAGAGAGAGAGGAGAGGAGAAAGGAGAGGCTGAGGGTAA  
GACTCCCGTAGAGGCTGAGATCGAGGGAGGTGATGGGAGGCCAGAGCAAAGGTGGGGGCT  
GCAGAGCAGAAACAACACAGAAAGACCGAGAGAGGAGAGCAGGCA

>4110 len=166 tot-seq=2

CCGATCTCCTACGGGAGGCAGGAGTGGGGGATATTGCACAATGGGGGAAACCCTGATGCA  
GCAACGCCGCGTGAGGGAAGAAGGTTTTCGGATTGTAAACCGCTTTTGATTGGGAGCAAG  
CCTTCGGGTGAGTGTACCTTTCGAAGAAGCGCCGGCTAACTACGTG

>4111 len=167 tot-seq=2

AAGAAGAATCGGTGATGGTGCTACACCCAGCTTTGGCTGAGGTGGCTGATTTTGAAGCCA  
GCTTGGTGGGTTTTGCAGATCTCTCTTCGGCACCAGTTGATTCGGACCCAGAACCACTTT  
TAACACAAGAACTCTCTGTCTCTTTCTTTTCTGATTCCGTGAACTA

>4112 len=167 tot-seq=2

TGACTGGGTGTCTGTGTCCACCGCAGTGACTCCTAACAGCTTTTCATCACATGCCCAACA



ACCCAGACATCTGGGTGTAAACCCGCTAGAGCATAGTCCTGCCCCGCCCAACACCGTTT  
AGCAATTTCCCTTCTGAACACACGAGGCGAGCAGGCCATTTTCTCT

>4113 len=167 tot-seq=2

GAGCTATGGTGCAGAACTGGGCAGATAGGAGGAAGGCTTGATATTCTCTGCTTAAGGACA  
AGATGAGATGGGACAGAGGATGTGGGCCCCCTTCCCTCCTCCAGAAGATCATACGTGCTA  
CATCAGGGGGATATAACATTGCAGAAAGTAAAAGGCCAGCATCATCC

>4114 len=167 tot-seq=2

CAGCAGGAGGGAAGGGGGAAAAAGGGGCGCAAGACGGAGGAAGCAAGGCCGCGGGAACGA  
GGAAGTCTTATAGATTGTAAAGTTCTTTTATATGGGAAGAAACGCTAAGATAGGAAATG  
ATTTTAGTTTGACTGTACCATTTGAATAAGTATCGGCTAACTAGGTG

>4115 len=167 tot-seq=2

TTGCTGACCCTGAGGTATGGCAATCACTTCTCAATACATTCAAGTATGCGATCATCGAGG  
TTCCATTCTCAATCGCAATTGCACTTATACTTGCAGTATTCTGAATCGTAAGATGCATG  
GAAGAACAATATACAGAGCAATATTTTTCCTGCCAATGGTAGTTGCA

>4116 len=167 tot-seq=2

CACAGTTTGAGAGGACTGAGTCCAATTTTCAAAGAAATTCTGCTGTGGGTAAATGCTAT  
CAAACAGCATTGCATGCTACAGAGAAATCTTTTGTGAATGGAAAAATCAATTGATACAGC  
ACTTCACTGTTGTCTTATTTTAAGAAATTGCCACACACACAGCCATC

>4117 len=167 tot-seq=2

CTGCGAGGGGGCAGGAGGCAGCCCCGCGCCCGGGCCTTACCCTGCCAGCTCCAGAAG  
TAAACTCGGAAGGCTGAGGCCCGCGCGCTGCGCGCCGCTAGCACAGCGGAGATCTGCGG  
CAGCTTCAGCGCGGCGCACACGCCAGCGTGCGCCAGTTACACAGCC

>4118 len=168 tot-seq=2

GCCGCTGAGGGCAGAGTTGGAGGAGCTGCCAAACCGCAGTGCATCTGGGGCTGCTGAATG  
TGTTGCAGCCTCCCCTGGGGTTTGCCTGTGAGACCCAGCCCCCTCAGGCTGAGGGTAA  
GGTGTCCATGAGGCTGGAGAACAGGGTCAGGAACCCTACATTAGGAGG

>4119 len=168 tot-seq=2

TGAGGAATATTTTGAATGGGCGAAAGCTTGACAGAGCAATATCACGTGAGGGACTGAGA  
AATCCGAGTTTATTATCTTTCTTTTGAAGGCCTACGGGTTGTAAACCTCTTTTCTCAAT

GAAGAAGATTTGACATTATTTGAGGAATAAGTATCGGCTAACTCTGTG

>4120 len=168 tot-seq=2

ATAGTGGGGAGTCATTGAAAGTTTTCTGCAGAGACAAGATGAAAGCTAGCCTTTAGGGGG  
TTAATCGGGCAGCACTACGGTAGGTGGAGGTGAACTAGAAAAAGGACTTGGGTGGAGGAA  
GGGGCATTGAGAAAGCAGTTTATGCCATGCAGAAGCAGTTCACGGTGT

>4121 len=168 tot-seq=2

ATCACCCCAGCCTGGGATGAAGAGAAGGTGCTGAGAGGAGACCTACCACTCAAATTGATC  
ACCCAATCAGCCCCTCCCAGAACGACAATGGGTTCTCAGGGCCTTTGGGGCCTGTGCTC  
TAAGTGCTGACAAACCTTCGTGATTATCTCAAGGCCTGTTCAACTCTT

>4122 len=168 tot-seq=2

CCATGAGATTCTGCCAAGCCACCTGAAACCCATACATGAGCATCCACCAGCAAATACCT  
TATCTGGGACAATATGAACTTGGCATTGCTCATCCTCCCCCTCCCCCTTGACAGAGCG  
AGCACAGCCCTCCTCCTCCTGAGTCAAATGTGGTCCAGGAATGCTC

>4123 len=169 tot-seq=2

CTATACAGGGAGACTGTTGGGAGGAGGGGGCGGGGCACACAACTCAAACATGAAAATGT  
CACAAAGATGACAAACCAGTGGCATGAAATGCCAATTTAACAAAGTAAAAGTCTGGCCTGG  
ATCAGGGGTGAAGTTCAGGGTGGAGCACTAGGTTAGCTGAGATGAGACC

>4124 len=169 tot-seq=2

TCAAGCAGAAGACGGCATAACGAGATGGCAATGTGACTGGAGTTCAGACGTGTGCTTTCCG  
ATCTCCTATGGGAGGCAGCAGTGGGTAAGGAAGCCAGCTGTGGCTAAGGAAGCCAGCTAT  
GGGTAAGGAAGCCAGCTGTGGGTAAGGAAGTCAGCAGTGGATAAGGAAG

>4125 len=169 tot-seq=2

GGTCCGGCCTCAAGGGCCACCAGCAACATTCTGCTGGCCCTGGAAACAAAATAATGAGGG  
CCTGGCCCTTCAACAGTATTTCTCTAACTCTGCTGCCACTCAGGGGCAGTTCATATATT  
GCTTTGTATCATGGTTACTTGTTATCGCTTTCTAAATGTTTTACTTCGT

>4126 len=169 tot-seq=2

CACCCTCTGCAGTATGGTTTTTCAGGAAATCCAGAAGTGGAGGGATCCACCAGAACTCCA  
GGCACGTATGCAGCTGATGGGCCCGGCTGGCTTGGGGAGCATAGGTTGTCCCCAGGGAAA  
GGGACTGTGCCAACCTAGGAGGTGGTCTGCACATGGTGTCCGAGGGAG

>4127 len=169 tot-seq=2

CTGCTTTGTCTGGTTACCCTCAGACTGCCACGCTATGAGGAAGCCCAGCCTATTCACATG  
GAGGCACTACATGGAGAGACAGAGTGATGACTGCCAGCTGCAGCTCATGCAACCATCCC  
AGCCCAGGGGCCAGACACGAGAGTGAGCAAGCGCCTGGGCGTTCCAGCT

>4128 len=170 tot-seq=2

AAGATGTGCAGGGACAAAGAAAGAGCAGAGATGGAATGAATGATCAACCAATGACGGTCC  
CAAATAAGACCCATCCCATAGGCAAGAACCAATCTCTTGACACTATTAATGACACTCTG  
CTATGCTTGGAGACCGGAACCTAGCAGAATTGACCTCTGAAAGGCTCCAT

>4129 len=170 tot-seq=2

GGATCCGACCGCAAGGGCTGGTCCCTGAGGCCACTAAGGGGTGCGCTGGGCTAAGGCCGC  
CTGGGGCAGGAGCCAGCGGATCGTGGCGGGCCAGCAGGCGGGGCTGGCTGAGGACTAG  
CAGCGACCCGAGACCCCAACCCTTCCCACGCGGACCCCGGGATCCCTCTC

>4130 len=170 tot-seq=2

AGTCTAAGGAAATTTTCTTAGACAGAAGTCTGAAACTAGCATGGAGAATAAATGGTTAAG  
GAAAGAGAGAGAAAGAGAGACAGCGAGAGAGAGCGAGAGTGAGAGCGAAAGCGAGAGCGA  
GAGAGACAGATCAGAGATGGGACCTCCAAAGCCAGGATGTAGCAAGGTTA

>4131 len=170 tot-seq=2

GGGAGAAAGGCAGGGCTGGGCAGAGGTGGATGGGCATCTCTGGGTGGGGTGAGTCCAGTG  
TGAAGTGCCCTTCTGGGTAATAGGGTGAGGGCTCTCTCCAATTACACACCCTCCATCCC  
TACCGATCACTCCAATCCAGTATCCACCTCCCCACCAGACCGGTAGCCC

>4132 len=171 tot-seq=2

CTGGGTCTGTCTCCTTATGGCTGCCTTAGCAGAGACAGGGACCGACAGGGGCTGAGAA  
ATGGCTCTGCACACAGGCAGGTGCCCTGGATTGCACAGGAGCAGAATGCCACAGGGCAAC  
GCAGGCCAACACAACACTGTTGCAGACGTATGCCCCA CACTCTCACTTCCC

>4133 len=171 tot-seq=2

CTGAGATGATCCCCACCTCCTCTGCCACAAGTCTCCCCCTCCTTAGCAGCTTGGGACA  
AGTCTCACGTTCCACCTCCAGAGCTGCAGTGGCCCTTGACCATGGGTCGGGGAGGGTA  
GAGTGACATGTTTGCTGACAGACTGGTGGCCAGCGTGCAGAGGGGAACAGG

>4134 len=171 tot-seq=2

ACTGGAATATCAATTACAGAAGGAGCCAAGAAAACATGGACATTTAGGGTGTGTATGCAT  
TCTGTTGCTGGGATAAAATACTATGAGCAAAAGCAACTTATACAATGAATAACTGGTCTT  
GTCTTATGGTTCAGAGGGACAAAAGCCAATCATAGTAGGAGGCATGGCAG

>4135 len=171 tot-seq=2

TGGGGAATCTTGGACAATGGGCGAAAGCCCCGATCCAGCAATATCGCGTGAGTGAAGAAGG  
GCAATGCCGCTTGTAAGCTCTTTCGTCGAGTGCGCGATCATGACAGGACTCGAGGAAGA  
AGCCCCGGCTAACTCCGTGCCAGCAGCCGCGGGAGTAGACGGAAGAGCGTC

>4136 len=171 tot-seq=2

TTTCAAGCAGAAGACGGCATAACGAGATAAGTTGGTACTGGAGTTAAGACGTGTGCTCTC  
CGATCTCTACGGGAGGAAGCAGCTCCAGCGTCAAATTTGTCTCCACCACCTCCTCCTCT  
CGGAAGAGCTTCAAGAGCTAAGAGCCTGCAGCAAGTTACTGCCTCCCAAGC

>4137 len=172 tot-seq=2

AAGAATGGGAGCCTAGGGTTGGCAAACTGCCCTGGGCTTGAGGAAGCCAGTTTGGAAAA  
GAAGCTTAGCAGGAGGAGGGGCCCTAAGCAAGACCATGTCAGGCAGGTTTCCACCAGGG  
CATGAAGGTGCATTTCAACGGCAGCCCCTAACTTAGTCTCTGGGGCAATTGG

>4138 len=172 tot-seq=2

TCCGACCTGTGTTTAAACAGGACCGCTCTGGTTCCTGCTCTAAGACAGGCTGAGGGGACAC  
GGGGGCGCCTGGGAGACCTGCTGAGACTGTCGAGGAAATGAAGGAAATAGAGGGGACAAA  
ACATGGAAGTGGCAAGAAGCAGCTGGGTTCTGGGTGTGTTTTGAAAGTAGAG

>4139 len=172 tot-seq=2

CCAAGCCACTCACTGGTGGTCCCACAACACCCCATGGAAAGAGGACAGACCCACAGTCCC  
ACCTGGACCAGGGCAGAGACTGCTGAGACCCAGCACCAGAACCAACCAAGAAACACCAGG  
CAACAGCATCAGAGGGGGCTCTGGCAGAACAGAGGAGGGGAGGTCTCCTTCA

>4140 len=172 tot-seq=2

CAAAGCTCCAACCTGGACCCACGCAGCTCACAGTAGCTCCCGCTTAGGCTACACACAGGC  
CTGCAATCCACAGATAAACACAGCTGGAGAGAAAAAGCAGCCGGGAATGCAGCTGGGCTG  
TTTTCTCAAGAGAAGCCCAAGTGGTAAGTAGGGATGCAGCCGCCCTCCCTGC

>4141 len=172 tot-seq=2

CACCATGTCCTCGTTTGAGGGGTAGTCTGGCAACCTGACCACCCTTACTCTACAGAAAT

CCAAGAGCAAGTCAAACATGTGCTCTCTGCCTGCGATGGGCACTATGCTACTTCTCTTC  
CTCTTGCTGGAAGAAGTCACACCCTACTCTCCAACCCATGCAGCCCTCCATC

>4142 len=173 tot-seq=2

CTGAAGGGGCAGGTCGGATACACGTGGCTTTGCTTGAGATCCTGGGAAAAGCCCTGCTT  
TCCTGGTCTCTCTCCGTCTTTAGCTCCTGTCCAGAGCACTTTCCTTGCTTGGCCCCAG  
ACTCAGGGCTCTCTGGCTTTTCTCCCCTCTCTCTCAATTGCTCTTCTCTGG

>4143 len=173 tot-seq=2

GTGACTGGAGTTCAGAACGTGTGCTCTCCGATCTCCTACGGGGGGCAGCAGAGGGATGC  
ATGCTGTGTGCCAGCAGCCATGGTCAGGGACAGAGGCAGCAGAGGGATGCATGCTGTGT  
GCCAGCAGCCATGGTCAGGGACAGAGGCAGCAGAGGGATGCATGCTGTGTGC

>4144 len=173 tot-seq=2

ACTTCTCATTACAACTATGCCAATCAGAAGACAACAGAGCAGCATCTTCAAAAATTTA  
AAACACAAACAAAATCCAAAGTCAGTTTGAATTCTACACCCACCCAGCAGAGCTATCTT  
TCAAAAATGAAGATAAAGAGATTTTCAGATTTTAAAAAACAGTGATAATTT

>4145 len=173 tot-seq=2

AGTCGTGATCAGGTCCAGCTAGAGTTCTGCTTTTAGACACACAAGGCCTGAACGGGTTTA  
GAATGCTTATTTTCATGCGTCGCCTTTCTCAGAAAGATACTGGGTGAGGCATTCTACTGAA  
ACAAAGGAATTAAGCCCAGAAAAACAGCAGATCTAAATTCAGGAGAGGGGGCC

>4146 len=173 tot-seq=2

GGTTTCTTCATGCCCTTTCTTGGTTCTCTGATGATAGGCAAAGGCAGTAGAGACAGAAAG  
GAAAAGAGGAACGGAGTGCAAGAGACAGAAAGGAGAAGAGGAACGGAGTGCAAGAGACAG  
AAAGGAGAAGAGGAACGGAGTGCAAGGCAAGCCACCCTAAGAGGCCAGCCCTG

>4147 len=173 tot-seq=2

GCTTTCTGGCTTCTCTTCTTAGCTACACGTGCAGCAGGGTTATGGCAGTGCAGGGAATCA  
GCAGATAGGGTCTCTGGCTGAGCAAGAAGTTCCAAGGGAGCACAGATATGACTCTGCAGG  
GGCCTGTTCTCAGGGGTCTGCAGTCCCTGTGTGACCCTGCTAGAGCCTTGCA

>4148 len=174 tot-seq=2

GGGAGTCCCCTAACTCACACCGCTGTCAGCTCTTGAGGGAGGTGTGCCAACCACTGACTG  
TCCCCACCAGCTGCGTATCACTGGAGAAATTCCTCATTGAAGTCTCAGTTCCTCCCTGC

CAAAGAAAAATGATAATCCATGCCTCCTACTGGCCACATCTAAGGAGCCTGGAC

>4149 len=174 tot-seq=2

CGGGATAAACGCCGCCATACCGCCCATCGCAAACGCGCCGCGTTTGTGGCAGGTCTTAAT  
CAACAAGCGTGAGTAGGCGCTGAGGAAGGGTTTATCCATCGTCACCACCGGCCGGTCCGG  
CAGTACGCGATCCGGATGGTTTTTCAGCGTCTTGATATAACTGAAGATGTAATC

>4150 len=174 tot-seq=2

TGGGGGATATTGCACAATGGGCGCAAGCCTGATGCAGCAACGCCGCGTGAACGATGAAGG  
TCTTCGGATCGTAAAGTTCTGTTGCAGGGGAAGATAATGACGGTACTCTGTGAGGAAGCC  
CCGGCTAACTACGTGCCAGCAGCCGCGGAATGCACAGATCGGAAGAGCGTCGTG

>4151 len=174 tot-seq=2

CCCAAGGAGGGAAGTGTGGGAGCTGCGGGGACCATGCCCAGCCTGGGATACCACCCTTCT  
AACCCACCCTCACCTCTGCAGGTGGTCCATCCCGAATCCAGGCATCACCCACCCTCGAT  
CCCGAGACAGTAGCCCCACCTGGACTCAGGGTCCCTGCCTCCCGGACGGCAAGG

>4152 len=175 tot-seq=2

AGGGGGAAGAGTGTAGGCAGAGGGTAAGACTTTTGTTTTAAGAGATATTCTGGGTTGCTG  
TATAATCATAAAATCTTTACTTATCTAAGTTACTTAGTACTGTAGCTAACCTGCCTTCT  
GTGTTCTCTGAGGCTAGAACTGCAGTCTCTGGCATTAGCACCTCATCCTAAA

>4153 len=175 tot-seq=2

GAGCTTGAAGCAGCTTCTCATTTTACACTCACAGGAAACGGTGAGCAAGAAAAGCCATTC  
CTAGTGTCTGGCTTTTTTCCACTCTGCGCCGTCCAGGGTCTCCTGCAGGGGCTAGCCCTC  
TCTCCAGTCAAGAAGAGCTTCTCAAAGGAACTGACCCAACAGAGACACTGCTTCA

>4154 len=175 tot-seq=2

GGAGCTCAACCAGCCTGTGGTTGAGCCTGCGGGACCTGCCTTTATTAAGGCCAGGGTAC  
TATTCCTTAGGCTTTCACTTGGGACTTGTGGATCTGGGTCATTTAAAGAAAACATACCTA  
AAGGAGGGAACCTATTTACATGACTCCAGTGTGATCATTAGATTTTTTCCACAG

>4155 len=175 tot-seq=2

CCTCTTGAAGAAGCCAGCACTGCTTTAAAATGAGTTCACCCTGCCATCCAGGCAGCTC  
TACCACCAGGGTTTCTGTTTGTGACTCAGCCCCGAGACAGCAGGACAGTTGTGCTGTGA  
TCCAGCTCAGCCCCTGGCTCCTCCTCATCCTTTCTTCTATTTTTCCCCTCTC

>4156 len=175 tot-seq=2

TGGGCGAAAACAGAGCGTGGTCCGAGCAATCCGTATCTGCGGTAGATGTCGGTATAGTTC  
GCCGCTTCGGGATATAGCGATAATGCCATTCGATTCATCGTCCGCTTCGTGAGATGT  
GTATGCATATACACACCTTTGCCGACGTTTTTCTGATAAAGGTCTCCGGCGAGTT

>4157 len=176 tot-seq=2

AAGCCAGCACTGGACTGCCACCCCACTTCACATCATCCCATCTTAGGACCTTCAGTGAG  
CCAGCTCAGGGGCTCAGATGGACAAAGGGCAGAGGCTTTGTCTCCTCAGATAATAACAG  
AGATGGGTCACGCAGTGGCCACAGGAGGGTTGTGAACAAAAAATAAAGCACTGGCC

>4158 len=176 tot-seq=2

CCGACGGGAGGCAGCAGGGAGGAAGGGGGCACAAGGGACGAAAGGCGGAGGGAGCAAGAC  
CACGGGAACGAGGAAGGTCTTCTGATTGTAAAGTTCTTTATTTAGGAAAAAAGCGCGC  
TAGGAAATGAGCGCGCCTTGATGGTACTAAGTGAATAAGTGACAGCTAACTATGTG

>4159 len=176 tot-seq=2

CAGAAGTTTAGACAATTATGGTTGGATGATTCTTAACTGTCCTAATCCCAAGTCCTCAAT  
TTATAAGTGAGGAACTGGAAAATCATTACACAGCTAGCTGCAAGCAATGACAGCCTTGG  
AGAGAAATCAACCTGTGTACAGCTCAGTCCCATCTGAGTTCTTTGGAGAACAACCT

>4160 len=176 tot-seq=2

AGCTTGCAGCGTGGCTCAAGGGAAGTGGGCAAGGATAGAACAAGTTGAGGCCAGGCTGGA  
AGTTGCATGCAAGGACTAAATTAGGCACGGCCTTCAGACATCTTGAGGATCTGGAGGCCT  
TAACCCAAATGGTAAGGAAGCCAGGAACGGTTTTAGGCAGAGGCTAAAAGATCACT

>4161 len=176 tot-seq=2

GGCATATGGACAAGGCGGAGCAGGCCAGCCGTTAGGCCGTGCACCGTATCCGCAGGGCGG  
AATGAGGCAGCCTGGAAACCGCGCGCCGTATCCGCAGGGAGCGGCGAACCAGATGAGAAA  
CCGTACAGGGAAGCGTTCCCGGTCATATGCGCCCAGCCAGCCTCAGGGAACAATGG

>4162 len=177 tot-seq=2

TCAGTCTCATAGAGGCAGACTCTTGACATGGACTAGCCTTCCTCCACAGGTTATTTAT  
TTGTCTGTTTTATTTCAGAAGGCTCCTCGGGAGTTTCCAGTGTTTTACAGCAGCCTCAGC  
CCAATCCAGGCCCTGAGAAGGAGAATGTTCCGACTGTGGTGAGGATGGTGA CTCTAT

>4163 len=177 tot-seq=2

AGCTGAGGGCCAGACGCCAGCAGCTCACCCCTTAGACAGGAGCAAAGTGCAGAGGGCAG  
ATGGTGGCATCCAGTGTGCGGTCTGAGGGAGGCCCTGGGTCAAGGTGGAGGTCTGCAGGA  
GTGTAGAGCGGACAGCATCCAGGTGGACAGCTAGGGGAGGCTGGGGGCCACTAGGCC

>4164 len=177 tot-seq=2

GTTGTGCTCTTCCGATCTCTACGGGAGGTAGCAGTGGGGAATATTGCGCAATGGGGGAG  
ACCCTGGCGCAGCGACGCCGCGTGCGGGATGAAGGCCTTCGGGTTGTAAACCGCTTGTGA  
GTGGGAGCAAGCCTTCGGGTGAGTGTACCTTTCGAATAAGCGCCGGCTAACTACGTG

>4165 len=177 tot-seq=2

AGTGAAAACGTATCCCCTAAATGGCTGGCCAACCTTAGCATATGGACAGTGTACCTCT  
CTCACACAGAGCCACTAAAACTAAACACCAAACCAGTTTTCTGGGTAAAGTTTTCTA  
AGATGAAAATTTAAGCAGCAAGATGTGTCAAGTTGTAGATGTTGGCCAGGAAAAAG

>4166 len=178 tot-seq=2

CCACAGCTCCTTCTGTGGGCAAAGCTGTCCCGGTGTGGATCATGACAGGGGACATGAAA  
GCAACAGCTAGAGCCTTCTCAGGCTTCTGAGTCCCCGTGAGTATCAGTGAGGTCCACTG  
ATCATCTTTTGCTCTCAAACCCATACCCCTACCTAAACATCTGGATCTCCATATCCCA

>4167 len=178 tot-seq=2

AGCCAGTGTGTGCTTCATGGGGTCAGGAAGGTAAGGGGCTCAGGCTCAGGAGGGAACAGA  
CAAGCCCAGGGCAGGCCATACATCCTTCTCCAGCCTCTGTCCCTCTCTCCACAGCTCTCA  
AAACCTGCCCCGACAGGTTTGGGTTCTGAGCTACCTGGCCTCCCGCCTCCCTGCCTGC

>4168 len=178 tot-seq=2

GGAGGGTTGTTGGACTGTGGTGTGTAACCCAGAGCCACCCCATTCCTGAAGCAGGAAG  
CCCCTGCTCTGGGAGGCCCTGAAGAGGGCAGGAGGAAAAGGAAGGATGCCGCTGACTA  
CTGTCATCTCTACTCCAGCAGGCCCTCTGCAAGGTCATCTCTCAGGTTACCAGA

>4169 len=178 tot-seq=2

AAATGTAGTTGTGTTGGTTTTTCTTCTTTAGCCAAGCAGCTACCAAAAAAAAAAAAAAGG  
AAAGAGACTGAATTGATAGATACATTTTACTGTCCAGCTGCCAAGAAGGCATTGCCGACA  
ATGAGGATTTCAGAATAATAACCCCTAAAGAGAGGAGTTCAGAGCATCCCATTCCTGC

>4170 len=179 tot-seq=2

CACTCTGTAGACCAGGCTGGCCTCGATCTTAGAAATCTGCCTGCTTCTGCCTCCCAAATG



CTGGGTATTAAGGCATGCGCCTCCACTGTCCAGCTCAGCTGGCACATCTTACCAGATAT  
GTCAAAAGTGATTA AACAGGGTCCACAGCCAAGCAGGACAGCTGGAATCAAGTCTCTCT

>4171 len=179 tot-seq=2

CCCTGGCTGTCCTGGA ACTCAGACTGGCCTTGAATTCATAGAGAGCAGCCTGTCTCTACC  
TTCCAAGTGCTGGGACTAAAGGCTAGTATTTGTCTAATTCTAAGCAGCCTCTGACCACTT  
GTTTCTCCAAAGGTGGAGCGAATCAAGGAGCGTGTGGAAGAAAAAGAAGGGATTCCCCC

>4172 len=179 tot-seq=2

TGGGGAATATTGCACAATGGGGGAAACCCTGATCCAGCGACGCCGCGTGGAGGAAGAAGG  
TCTTCGGATTGTAAACTCCTGTTGTTGAGGAAGATAATGACGGTACTCAACAAGGAAGTG  
ACGGCTAACTACGTGCCACAGCCGCGTAATAGTTAGATCGGAAGAGCGTCGTGTATGG

>4173 len=179 tot-seq=2

TGGGGAATATTGCACAATGGGGGAAACCCTGATGCAGCGACGCCGCGTGGAGGAAGAAGG  
TCTTCGGATTGTAAACTCCTGTTGTTGAGGAAGATAATGACGGTACCTAACAAGAAAGCA  
CCGGCTAACTACGTGCCAGCAGCCGCGTAATCGCCAGATCGGAAGAGCGTCGTGTAGGG

>4174 len=179 tot-seq=2

AAGCAGGCGGCCAGGGCAGTGGTGGCTACATGGCCCCTGCTCCTGT CAGGGGCTGCAGG  
GACCACGCACCACGATGTTGTTGCGGCTCCATAGACTCCACGGCCACCAGGA ACTTGTGCT  
GAGCCTGCTGGTACTCCTCACTGTGCTCAAACGCAAAGAAGGAGAGGCCTTTTTTGATT

>4175 len=179 tot-seq=2

CCACATAACATGAAGAGAGAATCTGTGCATTTGGGAGATGGAGAGCACAGTGATTGTGTG  
ACTTTGCATTGAAACTCTCTGCTTTCCCCATCACGGTGAAAGCAACACCAGGCAGAACTC  
AGCTGGTGCTCATGAAGGGAGCATTTAGACCAACCCTAGCCAGATAGGAATCACTCATC

>4176 len=179 tot-seq=2

CTTGACAGATGTATGATCTTGAGCAAGTTTCTAAACCGCTCTAAGCCTCAGTTACCTCAT  
CTACAAAATGGGGATTCCAATAGTACCTGATAGTAAATATAAATGGTTTGCACCATGCCT  
GGCGCAGCAA ACTCCATAAATAGTGGCTATTGTTATCCTCACCTCCCCATTA ACTCCT

>4177 len=180 tot-seq=2

TGGGGAATATTGCACAATGGGGGAAACCCTGATGCAGCGACGCCGCGTGGAGGAAGAAGG  
TCTTCGGATTGTAAACTCCTGTTGTTGGGGAAGATAATGACGGTACCCAACAAGGAAGTG

ACGGCTAACTACGTGCCAGCAGCCGCCGTAATCACCAGATCGGAAGAGCGTCGTGTTGG

>4178 len=180 tot-seq=2

GCGCCGACGGGAGGCAGCAGTGGGGAAGAGGGCACAAAGGGGCGCAAGAAGGATGCAGCCA  
GGAAGAGGGTATGAAGAAGGCCTTCGGGGGGGAAAGGACTTGCAGCGGGGAGGAAGGGAG  
GAAAGGGAAGAAAGGGGCGCATTGAAGGGACCCGCAGAAGAAGAACCGGCTAACTCCGTG

>4179 len=180 tot-seq=2

AGAAGGGGGAGAGGAAGAGAGAAGAAGGGAGGAAGAAGGGGGGAAGAGGGAGAAAGGGGG  
GAAAAAAGGAAGAAGAGACGAAGAGGGCGGGAGGAAGGCCGCCGGGGTGGAAACCGCGTT  
GGAGGGGGAGCAAGCGGGCGGGGAGGGGACCGGGCGAAGAAGCGCCGGCGAACGACGTG

>4180 len=180 tot-seq=2

TGGGAGAAAGATGCCAGTGTGCTGGTGCACATCTGTGTGGGCCACTCTGCTGGAGCTCTT  
TCATGGTCAGGCATGGTCTTCCAGCACAAAGCTATGATGCGGGCCCTTGGCAGGCACCCC  
ATTTGGGCATCAAAGACTGTACTGCAAGCAGGCGTGGCCAAGCTGGGGCCCCATAAGAGG

>4181 len=180 tot-seq=2

TACAGGGAAGGCGCGCCACTTGCCAGACTGCAATCTAGCTTTTCTCAACCTCAGTTTT  
ATTACACGTAAAATAGAAGCTAACATGAGCCTTACTTCTTCCAGAGTACAAAATGGAA  
AGTCTAATGAACATTAATCATCTTTGCAATAACAGCTAACAGTTGAGTGCTAAAGATAGG

>4182 len=181 tot-seq=2

TGGGGAATATTGCACAATGGGGGAAACCCTGATGCAGCGACGCCCGCTGGAGGAAGAAGG  
TCTTCGGATTGTAAACTCCTGTTGTTGAGGAAGATAATGACGTA CTCAACAAGGAAGTGA  
CGGCTAACTACGTGCCAGCAGCGCGTAATGCATAGATCGGAAGAGCGTCGTGTTGGGGA

A

>4183 len=181 tot-seq=2

ACAATGATGTGAAGAGCCAAGGGACAGGGGATGGATGTACATGCGCCAAGGGCAGCCAAG  
GATGGCCAGCCATCAGGAGAACTGAGGTT CATAGCTTTGCCAACATCTTGATTT CAGAC  
CCCTGGGGCTACAGGAATGGGGCATTCTGAGGTACACAGCCACCCATCTTGAAACTGTT

C

>4184 len=181 tot-seq=2

ATCTCCTACTGGAGGCAGCAGTAGGGAATCTTCCACAATGGACGCAAGTCTGATTGAGCA

ACGCCGCGTGAGTGAAGAAGGTTTTCGGATCGTAAAGCTCTGTTGTTGGTGAAGAAGTAT  
AAATTTAGTAACTGGCCTTTATTTGACGGTAATCAACCAGAAAGTCACGGCTAACTACGT  
G

>4185 len=181 tot-seq=2

TAGGGAATCTTCCACAATGGACGAAAGTCTGATGGAGCAATACCATGTGAACGATGAAGG  
TCTTTTGTATTGTAAAGTTCTTTATGAGGGATAACAACCTGATAGTACCTCATGAATAAG  
TGACAGCAAACCTATGTGCCAGCAGCCGCGGGTAATCTTTAGATCGGAAGAGCGTCGTGTA  
G

>4186 len=181 tot-seq=2

TGAATGAGACACAGTTCTTGCCTTCTAGAAGCTCTGACTCTGGACAGAAATGAAGATTGA  
TGGGAATTTTGTAAATATAAAAATAAAAAGGCTAACTGTGAGCAATGGTGATAAAGGCCACA  
TAAGCTATTGGCTCAGGCACTGTGGCTGCACCTAAGGGAGGCACCCACCCAGTTCTGGA  
G

>4187 len=181 tot-seq=2

CCATTCCACAAGGGAGATGGGTCAACATGGCTGACTAGAAACAGCTCATGTGTGCCTGTC  
TCATAGGGAGTGGACAGAGTGGCTAGTGAACATTGACCTTGCAAATCGGTTGTGAAGAA  
AACACATTAGGATCCAGCAACACAGTGAGGGGACAGACAGAGCAGAGAGGAGAAAAGCTG  
G

>4188 len=182 tot-seq=2

ACCCCTAAACAAGGAACCGCAACCTCTCACTTTACAGAGAGGTTACAGGAATAGTAACA  
GACCTGACAAAGTAAACTCTTTTCAGTATCATATGGACAGCAGACACGTGTCCTTCAGC  
CCCTCCCCTCTGAAACTCTCATGTCTTGAACAGTAGGGAAGGTGGCTTCATTACCTT  
TC

>4189 len=182 tot-seq=2

TGGGGAATATTGCACAATGGGGGAAACCCTGATGCAGCGACGCCGCGTGGAGGAAAAAGG  
TCTTCGGATTGTAAACTCCTGTTGTTGAGGAAGATAATGACGGTACTCAACAAGGAAGTG  
ACGGCTAACTACGTGCCAGCAGCCGCGTAATGAAGAGATCGGAAGAGCGTCGTGTAGGGG  
AA

>4190 len=182 tot-seq=2

TGGGGAATATTGCACAATGGGGGAACCCTGATGCAGCAACGCCGCGTGAAGGAAGAAGG  
CTTTCGGGTTGTAACTTCTATCAATAGGGACGAAAAGAATGACGGTACCTAAATAAGAA  
GCCCCGGCTAACTACGTGCCAGCAGCCGCGGAATCACGAGATCGGAAGAGCGTCGTGTAT  
GG

>4191 len=182 tot-seq=2

TGATATGGAATCGTATGTGAAGTACAAAGACACAGAACCCAGCAGCAGTGTTCTGGAATC  
CTATCTGGGCGACAAACATTCAGAACTTCCTAGCAGTGCCTGGAATCCTTTGTGAGGAA  
AAAACATTCAGAGCCTCATAACAGTGTCTGGAATCCTATGTGAGGCACAAACACACAGA  
AC

>4192 len=182 tot-seq=2

AGCCCAGCAGCCTCTCAGAGGGTCTCTGCATGGGCCTGGGATTAGGGCCCCTGCCAAC  
ACCCAGCAGCCTCTCAGAGGGTCTCTGGACGGGACTGGGATTAGGGCCCCTCCCGGAA  
CTCCAGCAGCCTCTCAGAGGGTCTCTGCATGGGCCTGGGATTAGGGCCCCTCCCGACA  
CC

>4193 len=182 tot-seq=2

GGAAAGCAGGTCACTGTCAACATCCTGAACTCAGTCCCTCACTCTGGCCCCTAAGGC  
CTCTATCCCCAACTACATCCTCACCAGTCCCAGCTTAGAGGGTGGACACCCCCTTGAG  
GGGCATGGAGATGCTTGATGAGTAGAGCACAGGCCAGATTTAGCCCCTTTCATCCCCAG  
GC

>4194 len=182 tot-seq=2

AGCTGGGAACACTCCTGCATCACCCATGAGCCCTGCCGGGGTCTCAGTGTCCCCGTCTG  
CGAAATGGGATAAGGGCTCTGCACACCAGCCTTGCTCCCAGGGGCCAGAGAGGGGAGGGA  
CAGTGTCCCTAGTGACAGATCCAGAACTGAGGCCAGGAGGCGCTGGCCTGGACGCCCT  
GC

>4195 len=183 tot-seq=2

CCATGCCCTGCGTGCCCCACTCACACAGATGCACCTAAAAGCAGAGACAGGAAAATGCAC  
CAGGGCAGGGTATGAGAAGGAAAAGTCAACAGACAGCTGCTGTTCTGGGAGAAAACAAC  
TCACGCCCTTCCCTGGCTACAGGGCCGCTGCCAGAAGACACAGTGTCTCTGCTGGAAAG  
AGA

>4196 len=183 tot-seq=2

CAGGGTTGGGTTGTGGTGTGTGAACCCGAAGAAACCTTCCCTGCCTGTTGACTCTTCCCT  
TGGGGTCACAATAGACGTCCTGATAAGTCCCCCAAACACCAAGAGGACCAGAGACCACTC  
TGCCCTTGAAAGACCTCAGCCTGGGAGTCTGTGAGTGACGGCACAGCCCTGGATCTCCC  
CTC

>4197 len=183 tot-seq=2

CCTGTCTATTGGGACAGCTTGGTCAGCAAGGGGTGACCTTTGACCTCCAGCCCATGGAAT  
GGATGGCTGCAGCCACACATGCCTTGTCTGCCCTGCAGAGGTGAGGCCCCCCAGGGAGG  
GCACAGACATGTTTTCTCTGAGTCAGACACTAGGACTGCATTCAAGGGGAAAAGACTGAA  
ATG

>4198 len=183 tot-seq=2

ATCACAGCCCCAGTTGCTATGGGACACCTCTGCCCGCAGAGAGGGCAAGATGCCGAACGT  
CCCTTATTGATGTGATTGCCTCCTTGGAGATGGGAATGCCCTCTAAAAGGGCCAGGCTA  
GGAGCCGACAGCACACGGGCTCTCGGGTTTGCCATGGAACCGGGCCTGAAGCAGCCTGC  
ATC

>4199 len=184 tot-seq=2

AGTGAGCAATAGGTAAGCCAGGCATAAAGCCTAGGTGTATGTTGAGGGTGGGGATGCAGT  
GTGCTGAGATTGTCCCTTGACATTTAACTCAATCCTGGACTCCATTCCCTCACCAGAGGT  
GTAGACAAGAGCACATACTGTGACTACAAGCTCACCTTTATAGTGACATCCATGGGCTA  
CCGC

>4200 len=184 tot-seq=2

ACTAAACATCCCCAAAATACACAGGATAGCCTGATAACAACGCAGAATTATCTGGCCCCAAA  
CATCAATGGCATGGAGGTTGAGAAACCCTGCTGAATTACAGAGGGTGCCCGTCCTTACCC  
ACTGAAACCAGGTTCTAAAGTTCTCCAGCATCACATCTCGGTACAGCTTCTCTGGGCA  
GAGT

>4201 len=184 tot-seq=2

GGAGGAAGGTGGGGATGACGTCAAGTCATCATGACCCTTATGACCTGGGCTACACACGTG  
CTACAATGGGCAGTACAACGAGAAGCGAGCCTGCGAAGGCAAGCGAATCTCTGAAAGCTG  
TTCTCAGTTCGGACTGCAGTCTGCAACTCGACTGCACGAAGCTGGAATCGTAGTAATCG

CGGA

>4202 len=184 tot-seq=2

GTTCTATACTTTCATTTTTGCACTTAATACATCTTGGAGATCTTTTTGTATCTGCAGAGA  
GAAGGCTGCTTCATTCTCTGGTACAGCTTGACCATCATTTCTTAGCCAGCTCCCAGGTA  
GTGGATGTTTGTGTGGCAGGTGCTGCTGCTGCCCTGTCCCATATCTCCACCTACCAGAG  
CTCA

>4203 len=185 tot-seq=2

GTTTTCTGCCCCTCCCGGCTGTCAGAAGCCCCACCTGCATCTTGGTCCAGCTGACTTA  
GCTCAGGCCGGAGCCTTTCCTTGACGCTGCTCCCCATCTGTTTCTCATGGGTCCAGCCTG  
AAGACCAGTGGTGTGAGATGGGGAATGGGCAGGTACCCATTCAATCTGCCTGAGCCCAGC  
CAATG

>4204 len=185 tot-seq=2

CAATGAATCAGACAAAAAAGACAAAAAAGAAAAGAACTTAGAGGAAGCATGAGCAGTCA  
CATGCTGAAGTACAAAACCCAAACCACAAAATGCTCCAGCTGTGTGTCACAATTCTTCA  
GGGAGGCTGGGCATCCGTGGGAGCCATGGCAGCTAGCCCAGGGAGGGGACTCCTTCTTCT  
CGTGG

>4205 len=185 tot-seq=2

TAGGGAATTTTTACAATGGGCGCAAGCCTTATGAAGCAATGCCGCGTGAGTGAAGAAGG  
GTTTCGGCTCGTAAAGCTCTGTTGTTGGTGAAGAAGGACAGGGGTAGTAACTGACCTTTG  
TTTGACGGTAATCAATTAGAAAAGTCACGGCTAACTACGTGCCAGCAGCCGGCGGTAATGC  
TAAGA

>4206 len=185 tot-seq=2

AAGGGATCGGTGGAAGTTCTGGAGTTCATGTAGGTCTTGTGTTCTACAGTTGAGTCCCC  
TTCTAGGCTGTGTGCCACAGTGTAATAACAGCATCTATAAACACCTCCTGTTATTCT  
CACTTCTCCTCCACCAGACAGGGGTCCGGTCAAGTCCTGATGCTCTTTGGTGTAGAGCT  
GCCCT

>4207 len=185 tot-seq=2

G TTCAGACGTGTGCTCTTCCGATATAATAAGGGAGGGAGAAGTGGGGAATATTGAGAAAT  
GGGGGAAAAAATGAAGAAGAGAAGAAGAGTGAGGGATGAAGGAATTAGGGTTGAAAAAG

ATTTTGATTGGGAGAAAGACTTTTGGGTGAGTGTACCTTTCGAATAAGCGCCGGCTAACT  
ACGTG

>4208 len=185 tot-seq=2

GCGATCCAGGAAGCAGTGGTGGTGGTGGGCACCCAGCCAGTGCGGGCAGTGAGGCGCCCA  
GCCAGGGCCTGCCCCAGGGACAAAGAGACTCCCTGGCTCCGGGGAGAGAGCGCTGCCCC  
ACACTGAGAAGGGGGCACTGACCCAGCCCAGCCAGGCACATAGGGCAGTGGTGCCAGGCA  
GCTTG

>4209 len=185 tot-seq=2

CAGTGTTTTGGAATCTCGTGTGAGCTGCAAAGATTCAGAATTCATAGCAGTGTTACGA  
ATCCAATGTGAGGGACAAACACTCAGAACCCAGCAGCAGTGTCTGGAATCCTATGGGAG  
GTACAAACACTCAGAACCCAGCGCAATGTTCTGTAATCCTATGTGAGGGACAAACACTC  
AGAAC

>4210 len=185 tot-seq=2

GGCTGGACAGATCCACCAGGCAAGCTTCTTAGGCATGTGTATGTGTGTTTCTTGCAGGGG  
AAGCAGAAGTATACACTTCGCTGTACCACGCAATGATGGGTGGCAGTGAGGTGGCCCAG  
ACCCTCGCAAGGAGACTTTTGCATCCACCGCCTCCAGCTCCACAGCAATGTTGTCAAC  
TATGT

>4211 len=186 tot-seq=2

CAAATTAGGAAAAGGGGGTCTTAGACGCGTGTACAGTGTAGCGATTCCAGAGAGGATAA  
CTCAGGTGGCTGAAAGGCGGCTTTCTTTCAAGTTCTCAATGAGATAGGCTAGGTGATGTA  
ATATCCAAAATGAATTCAAGACCACTCCGTACCTTCCCCTTTTGAGAAAGGACTTTCAA  
ACTGTA

>4212 len=187 tot-seq=2

TGGGAATCTTGGACAATGGGCGAAAGCCCGATCCAGCAATATCGCGTGAGTGAAGAAGG  
GCAATGCCGCTTGTAAGCTCTTCGTCGAGTGCGCGATCATGACAGGACTCGAGGAAGA  
AGCCCCGGCTAACTCCGTGCCAGCACCGCGGTAATATAAGATCGGAAGAGCGCGTGTAGG  
GAAAGAG

>4213 len=187 tot-seq=2

CTTCATCAGGTGGGAGCCCTGCACAGCTGTGCCCTAAGGACTTCTCATACCCACAGTCCT

TTCTCCCTCAATGGCTGCTTGGCTAAGCACCACATCTGCTTCAACTCCCCTGAGCAGGGA  
TGTCTCAGGACTTCTCCCTGGGGGAGGCTGCCATGACCCACACCCTTTCAGGACCTGT  
GCCAAG

>4214 len=187 tot-seq=2

CATTGCAGGATGGCCCCACCATCCACCCAGGAGCCTGGCCTCCCTCTCTGGGTACCCCTC  
ACCCCCAAAACCTGTCCGTCATGAGCCCTGTCCCTCCCCACCTGCCTCCCCTTGACATAT  
CCCCTCCTCTGTGTCCCTGTAGCCTAGAAGCTGCTTAGGCCTCATCCTCCCCTTCTGGAT  
CCATGCC

>4215 len=188 tot-seq=2

GAATGGCTGCTGGTCTGGGACTAAGTTACGGTTCTCACGACCTAGTGACAATGTAAACTC  
GCTACTGGATGTGGCATGTGCCAGGGCTCTCTGAAATTGTAGGCTAAACACCTGGCTTTG  
ATCAAAGCCAACAGGAAAACAGTAGGTCACTATTGCTGTCATCCCACAACAATAAGATAT  
ACAAATCC

>4216 len=188 tot-seq=2

AAACTCTTTATGGAAGATAACTCCTAGAATCTTCCAGGCAACCCAGTGAGATAGTTATCA  
TTATAAATCCTCCCGCCCCATTTTACAGATGAGGAAACTGAGGCTCAGAGAGGGGAAGAC  
ACTAGCCCAAGGCTGCACAGGGATGGAGTCTGGTTTTGTCTTCAAGGCCTTGGCTCTTAG  
CCATGATG

>4217 len=188 tot-seq=2

GAGGCATGAGACTGGACCCCATCAGTGGGCATCCTGACAGTGGTGGATGGCACGGCATGA  
ATAACACATGAAGCCTCCATAATTGGTGTATTACACATGCATTTTCATCTCCATTCATAA  
TGATTGGACACTTAAACCCAGCCGCCGTTCTCTGCCGAGTGCTGCTGTCATCCTTCTAG  
CCGAGATC

>4218 len=188 tot-seq=2

CCTACAGCGGAAAGCATGCAGACAAGTGGTTCTGTGAATTATCTGAAGCAAATGCATTGT  
ACTTCACAGACTCTGTAGTAGAAAACCACCAGTGTGAATTTAGTGGGTCACGCGCTTTGA  
TCAGGGAGAATGAGTTCGCAGCAGTTCATCCATCCACGCCGCCAGCCTGACTCCCTTTC  
ATGCCATC

>4219 len=188 tot-seq=2



AAATGATGTTCTGGGATTTTTGAGCCTATACCTTAAGCAGCCTTG TAGCTTCTGCTTCTG  
CTTTTGGGACCCAGCAATTATGTAAAAGCTACTCTACTGGAAAGAGAAGCCAAGTGAGGA  
GAGAGGCCCTGAGGATGGGAGACCATAAAAGAGAGAGGACACACAGAGAAGAACAGAGT  
ACGTACCA

>4220 len=189 tot-seq=2

TGAGATGGGTCCTATCTTTCCTGGGGGAGCTGGTTACAATATTCAGCAAGGCAACCTCTG  
AAGAACAAACATGTCTTGCTTATGCAGCAAGCAGAGACCTGGCCCTGATAGAGCCAAAGA  
GGATGTTTGGAGTAGGAGAGGGACAAAGAAGATAATAAAGAGACCTGTAGGTACATATGA  
ACAGAAACA

>4221 len=190 tot-seq=2

CGTGGGGTGGGTCTACCTAATTTCTCAAGGGTTGAGGGCAAGTGCTGGCCGAGGCCTAGG  
CTCCATAGAAGCCAGCGGTGCAGGGCCACTAGGAATCCA ACTGGAGCCACCGGGGCCAAA  
ACCCTCTGTAGACTCTGGCAAGAGGTAAGTTGCTGGTAAGAACTTCCCTTGAGGGGTGGC  
AGACTGGAAG

>4222 len=190 tot-seq=2

GGAGAGAGAGAGAGAGAGAGAGAGAGAGAGAGAGAGAGAGAGAGCAAGTGAAGGGAGTCAAC  
ACAAAACAACCCACACAGAGCTGTAGGCCTGGCCTCTGCTCTTCCAATGTCTCCTGAC  
TCAAGTGTAGAGTGGGTGAAGTCACAGGCCCTTACCTCCCAGCCCTCACGGAGTGTAGC  
TCTCAGGGTT

>4223 len=190 tot-seq=2

TGGGGAATATTGCACAATGGGGGAAACCCTGATGCAGCAACGCCGCGTGGAGGAAGAAGG  
TCTTCGGATTGTAACTCCTGTTGTTGAGGAAGATAATGACGGTACTCAACAAGGAAGTG  
ACGGCTAACTACGTGCCAGCAGCCGCGCGGTAATTTATAGATCGGAAGAGCGTCGTGTAG  
GGAAAGGCCA

>4224 len=190 tot-seq=2

GGAGACCAAGTTAGATTATGCATAAAAACCTTTTAAAAGCATTGTATTCTGATGCAGCT  
TCTGGGCACTACAACTCAACTAAGAAACGAAAAGACAAAACATAGATAGTCTCCATGCT  
CAGACAGTTTAAATGCTTCATGAAAAAGAATACCCAAGTGTGAGCCACAGTACAGCGCAC  
ACCCAAAGTG

>4225 len=190 tot-seq=2

CTCTTCCGATCTCCTACGGGAGGCATCAGTAGGGAATCTTCGGCAATGGACGGAATTCTT  
GCCGAGCAACGCCTCTTGAGTGAAGAAGGTTTTTCGGATCGTAAAGCTCTGTTGTTAGAGA  
AGAACGTTGGTAGGAGTGGAAAATCTACCAAGTGACTGTAAC TAACCAGAAAGTGACGGC  
TAACTACGTG

>4226 len=190 tot-seq=2

TGCCCCGAGCCACGTCCACACCCACTGCCGTGCACCTTTGCAGTAGCCCCACTCTGACC  
CCGGCCTCTGCCCTGGAGCTTGCTTTGGTCGATGGGACACAGTGGGTATGATGCAGCACT  
GGCATGAGAAGTGCTTGACATCCCTGCTCGTCCCTCCTGTTCCCTGGACCTTTGTCT  
GAAGACATGC

>4227 len=191 tot-seq=2

AGTCCTCAAAGTCTGAGGGCACAGGTCCCAGTGCTGTGACTGATCCACACATTCCTGAGG  
CATTTAAAAGATACTACTGAACTAAAACAGCCATCATCCACCATCGCCTCCCACCCCCAA  
AAAACCAACAGGATTTGGAAGCCTCAGGAGGCTGAGAGCCTTCCCTTTCGAAGATGCAAA  
GCTAAATGTTG

>4228 len=191 tot-seq=2

GACCCTGGACAGTGGGCTTCAGGTACACGCAGCAGGGTTCTGGACAATGGGCTTTAGGGT  
TCTGGAGGCCAGTGCAAGGCCCGTCCAGCTGCCATCTATTCCTCCACGAACCTCTGTTT  
ATTCAGCACAGACCATATTCTGCCTGCCAGGCACTGCGCTGGCGCAGCTGGTGTCAAAGC  
ACGCTCCCAGA

>4229 len=191 tot-seq=2

GGCAGGGGGGGTCCACAGGCCACTGGATGCCACATTAAGCCTGTCAAACCTTTGAAGA  
ACAAGTTTGGGATTTGGGCAGCCTTTGCTATGTGACATTTAGGAAGAAAAATACCAGCT  
TTTGAATTACTGCAGACGACTGGGGGCCTAGGCAGTATGCAGTCTATACATTCATAAGGA  
TTCCTGTACCC

>4230 len=191 tot-seq=2

CTGGGAGGGGCACTGCTTCCCTGGCCTCCCCAGCGGGAGTCGGCTCCAGTGCCCCAGCAG  
TAACTGTATCAATGACATGCCCTTTATCACTTCCTTCTCTTTCTCACCTCATTTCTTAT  
GTCCTGGGATCACCTCCCAGGAAACCACTTGTGCTGGAACCTTTGTCTCCTGGGCCTTCC

TCATAGGGTCT

>4231 len=191 tot-seq=2

TTTTTTTTTTAACTTAAGAGACTTATACAAAGTATGAGACCTACCAAAGATCTCATCCA  
TGGGCACTGGAAGCGCTAGGTGATAGAAGAACTTAAACAGAAAACGACAGCAAATGTTA  
AAATCTTTTTCCAGTCCCACCATGTTATTTACATACCGATTATACCATTACTAAATATG  
GCCTCCCCTTC

>4232 len=191 tot-seq=2

GAACACCTTTACCAAATCTCCTCCCAGCCTTCGCAATGCCGAGGAAAACAGTCTCAACTT  
CTCCAATCTGTCTACGCAACTTAAGTAAATCACGAGCGACAAATTGTGTCCTTAATCTGA  
TCGCTTGGGAGCAAAGCTGGGGAGAGAGGGTTTTTCATAAAGAATTTGTGATTTCTGTAGC  
ATCTTTCATCA

>4233 len=192 tot-seq=2

CTGGAACACAGCAGGGCAAGGGCTCGGCTGTAACTGGTGTAACCAGTGTGAGACCGAA  
GGATCTTCTCAGTGAGTTGTCTCAGAGAGTCCCCAGACCTGTGAGGCCATTCTGTTGCC  
AGGTGAACAGGTAAGCAAATGTGCTACATCCATAAGATGGAGTAATAGTTGACCAGGAAA  
ATGAACCGACTG

>4234 len=192 tot-seq=2

ACCCGCACAAGCGGTGGAGCATGTGGTTTAATTCGAAGCAACGCGAAGAACCTTACCAAG  
TCTTGACATCCCTCTGACCGACTCTTAACCGAGTCTTTCCTTCGGGACAGAGGAGACAGG  
TGGTGCATGGTTGTCGTCAGCTCGTGTGAGATGTTGGGTTAAGTCCCGCAACGAGCG  
AAACCCCTATCC

>4235 len=192 tot-seq=2

CGCCAGTGCCACAATAGCAAATGTGCGTGACACGGCTGACCGGAGCAATCCTGGGAGGA  
TCTTTCTGGCTGAGTGACAAATGACATCCCAGAGATTATAAAGCTTGACCCTGGACACAG  
CAAGGTGGCTTCTGCAGGCAACAGAGCCAATGCCATCCCTGTTCTCCCCACCCCTGGCTG  
CAAAGCCCTTTC

>4236 len=192 tot-seq=2

GAAAAAAAAAAAAATGCAGAGGAACAATTCCTCTAGCCCTGGAAAATTCGTTTGAATTGC  
AAGCTTAAATGAACATAATAGGAGTGAAACCCAAATCCTCTGGCTTTCACCAGAACAGC

CTCACAGGGAAACAAATTTAACTGTGTTCCAAATTGGGCCAGGCTCCCACTATTCCACTG  
CAGGTGACAGTA

>4237 len=192 tot-seq=2

CAGGGTTTGAGAGGATTGACTCCAATTTGAAAAATTCTACCGTGAGTAAAATATAATC  
AAATAGCACCATATGCTACAGAGAAATCTTTCATGAAAGGAGGAGTCAAATGATGGGGCC  
AACTTTGTCTTCGTTTTATTGTATGGAACCACTATAGTCACCCCAATCTTCAGCAACCAC  
TGCCCTGGTCAG

>4238 len=192 tot-seq=2

CTCTCAGCCTAGCTATCTGCTGTGTGATCCCAAGGCCTCTTCAAACCTCTATGTGCCA  
TAACTGTCTAGCGGGCACCCAGATGTCTGGCCTGGCTGCAGAAAGGGCAGGAGAAGGGAA  
GGAGATGAGACCTCCACTCCAGCCCCCAGCCCCACCAAAGCCCTGGCATCACTGTCAG  
CCCACAGAGAGG

>4239 len=193 tot-seq=2

GCTCACCTATGGACTGGTTGACGGCCTTCATGCACAGGTTCTCCACCAGAGCCTTCCCTG  
GGGGTGCCTGGCCGGGGCTCTGGGCTGGGAGTGAAGGGGATGACCCATCAGGACTGTTC  
CCTGCCTGCAGCTCCCCGGGAAAAGACCCTGCCAGGCTTTGCAGCCAGACCAGGAGGC  
TTTGTGGCCAATG

>4240 len=193 tot-seq=2

GTTGAGAGCTGCGAGCCCAGGCCTGTTCTTCTGCACCCTGGTTCGCTCTGGTGCATGTGG  
CCAGCTCCAAGGACAAGAGGGAACCATCGGGCCTGAGGGCCCGTGACCTCTGATTTCTT  
AAACACGGAGCCGAAGACCAGGTCTGGCATCAGCCAAGGATTCACGGTCCTTTCTCGCTG  
TGCCTGGACCCTC

>4241 len=193 tot-seq=2

ATCTGAGTGGTCCCCTGGCTCAGGGCCAAAATGAGCAAACAGGTCCAAGGGAGTTTTGCC  
TTCCATGCCTTTTTCTTTCAGGTGCCCCACTGGGAGGAGCAGGAGAGTGGGGAGTTCC  
TGGGAGGGAAGGTTTCAGGGCTCCCAAACCACTTCTGCATTGATGAGGCCCCACAGGCC  
TTCTTTAGTTACC

>4242 len=194 tot-seq=2

AATATTGTTGCTATCATCCAAACACACAAATCTGTGAGAGCCATACCTATTCAAACCACC

ACAGGGATATTGTTCAAGACCATAGAAAACATGAAAGCCAGGACTGGAATAATACTAAGA  
GCCATATTTTTGAAGCATGACCATTTGCCAGACTTTGTTCTAAGAGCATTAAAGGACATCG  
CATCATTAAATTC

>4243 len=194 tot-seq=2

GTAAGGCGTTAGGTCCATTTGCAGTCTCTGAGCTTGAGGGAGGTGAGCTTGGTCCATCTT  
TGTCTCATGCAAAGTCTGCTGCAAGTAAACCTCCCTGGGCAAGACAGAAGGGGAGAGG  
TGAATGCCTCTGAAATGAAGGCTTGGCTCTGAGAAATCCCTGAACACGTCAGAGGGTAAA  
GGGCTGGCGTTTAT

>4244 len=194 tot-seq=2

AACTTGCTTGAGTCTGGAAAAGGCAGGAGAGTGTCTCAGACACACGGATGTCCTTGGTTC  
TCATACCTGTAACCTACTTTTGTGCGAAAAGAAAATAACAGCCCCCTATCAAGCCAGGGA  
CTTGGGCTGAGTCTGGTGTCCAGCCCTCCCTGGAGTAGGAACATGTCCAGGAAATAAGC  
GCCATACCTCTGGC

>4245 len=194 tot-seq=2

GATGTGAATGATGAAATGATAAATAGGGGCTGAGTGGCTGAGTGGTCAAGGCTCAGCCTT  
CTGTAACCACAACATCAAGGGATGCCTAAAAATAGTAGAAAGAGCCCAGGGAGGCGGGAT  
TAATCATCTCCAGCTACTTGTGAGAGTACTTGGAAGTGTACAGTGCCTCTCAGCTTCAGA  
GAAGTCACAGGGAG

>4246 len=194 tot-seq=2

GGACTGGCTGGCTGACCTTGTGAAAGTAGCTTACCTCTCTGGGCCCAAGCCTGCCCATC  
CATCCAGGGGAGGTGCACATGCTTCCCTCAGGGGTTTAGGGTGGAGGCTCAGTGCGACTT  
TGTGGGCAAAGTGCCTGGCACATGGCCTGGGATTCCTGACATAAGAGCCACTTGTGGCC  
TTGCCTCAGTGTCC

>4247 len=194 tot-seq=2

CCTCAGCCTTCCAAAGTGTGGATTACAGGCGTGAGCCACCGCGCCCGGACATAGAGGG  
TATTTTTAAATGCTTTGAAATTCTCAAAGAGAAAAGGAAGAAAAAAGTCTCAATAGGAA  
AAATGTGACAAACGGAATCCCGGCGACCTGTTAATGGTTAATTCTCACAACAGTGTCTCA  
GTGCATATCCTTGG

>4248 len=195 tot-seq=2

TAGATGTGCTACAAAATTCTGAGAAGAGCCCCTTAGCATAAAAAATTAAGGCCTAGGGCA  
CTGCAGTCAGTGGAGATTGCAAAGATCTTTAAAAGGTGATGTATTCTAGATCCTTTT  
TCATTCCAGTTTTAGGGTGCCGTAACCTTACTTAAGGAAAGCAATAATTATTCATAGTGG  
GGAAGTACCAGAGAA

>4249 len=195 tot-seq=2

TTTTTCTGGTTTTCTTCCAAATCCTGGTTGGGTAATTTCTTATCAAACAGATAAGG  
GTTTACAGACGGTCGAAGGTCCCAAACACACAATTCAATGGTAAGTAACAAAGCAGCCATGT  
GGACTGAACCCACATGTGTTTTGATGCCTGAAGTGAAGAGACTCTTAAGATAAATGAGA  
GGAGACTCTAAGAAA

>4250 len=195 tot-seq=2

CAGCAGTTGCAGGGCAGGGTCAGGGGATTCTCAGCCGGAACCTCTGGCACTTCCCCTTC  
TCTGAGTTCATCCTCCACGGTGCTCTTAGCATTCTGTCTTGATCAGGGTACGGTTCTC  
TTAGCCCTTGGCTCTGGCTTTCACCAGGACCCTGTTTGTCTTCTCAGATGTGGGA  
TGGGGAAGGACAAGA

>4251 len=195 tot-seq=2

ATTGTCTAGTACTGGAGTTCAGACGTGTGCTCTTAAGATATAATAAGGGAGGAAGAAGG  
AGAGAAAATTAATAAAGAAAAGGGGAGGTAGTGAAGAAAATAAATAAAGGAAT  
ATTTAGAGGAAATGTAATTGGAATGAGTCAACTTTAAATCCTTAAACGAGGATCCATTGG  
AGGGCAAGTCCGGTG

>4252 len=195 tot-seq=2

GCACACAGAGCCCTGTAACCTGACGGAGCAGACTGCTTTGCACAAAGGGCCCTGCAACC  
TGAGCCTGTTGACTTTGGGAGGAGCCCAAGGGAGCCGAGGCCTCTGGGCGCACACTG  
CCGGCAGGGGTAAAAGCAAGCTGGCCCGATTGAAGCGTGTGGAAGCCTGACCTGAGA  
TACGGGGAGAAGACA

>4253 len=195 tot-seq=2

GAGGGCTAGAGAGGATTGACTCCAATGTTGAAAGAAATTCTGCACTAGGTAATGTGAT  
CAAACAGCATCTCATCCTACAGATAAATCTTTTGTGAAAGGAAGAGGGATCAATGTGACA  
AATTCCATTGTTGTCTCTAAGAACTGCCACAGGCATGCCAATCTTCAACAATAACACC  
CAGATCAGTCAGCAG

>4254 len=196 tot-seq=2

GAGGTGGGAGAGGGCAAGACCCTGGCCACAGAAAGAATTAGGGCCTTTGTATCTGGGCAA  
ACACAACACAGATGATAACTCTTGAAATTCCTCCATGATGCCTCATCCCTGAGTGAGGTT  
TAGGCGGAGTAAGGGTACTGGAGCTCCTCCTCCCTACCCTACCATTGGGCATCCCAT  
GAAGTCTGTCTCACCG

>4255 len=196 tot-seq=2

CAAAGAGGTGGGAGGGTAGCCATGGGTATGTGCCAACGAAGTAGCGCAGGGAAAGACTATG  
GTGGGAAGAAGGTGCAAGTGGACTAATGCTCATGGGCAGGGGCCCTCTGCTGGGGCTCT  
CAGGCAGGAGCAGTCTGCCAGCGAAGGAGCTATGATGAGGGCCCGAGGAAGCACCTGTT  
TAGGCAAGCACAGGT

>4256 len=196 tot-seq=2

CAGGGGATAAACACACTGTCCTCCCCTTGCTGGTCTCCCCAGGGCCTCCAGGTGGAGGG  
ACGGGTGGCACAGTTCAACCGCCCCACCCCTCCGCCATCCCCCTTCTGCCCCATGTGGT  
GTATGCACAGGATGGGGCAGAGCTGAGCAAGCACAGCTCCTAAAGAGGAGGGCAGGAAAC  
TTGCTGCTCTTACAGC

>4257 len=196 tot-seq=2

CTGTAATTAGCCCCACTTTGCAGATGAGTTGAGCATTTTACCCAAGTCACTCTGTTTCTA  
AATGACAGAGAGATTTGAACCTGTCTGGACTTTTAAGTCCCTGCTCTCACACTGCCCTGG  
GAATCCAGCATCAGTGGGAACTGGAAAATGAGTTTTTCAGATCCCTGGAGCCCACAGACAA  
TCCCCACTTGGCAAGC

>4258 len=197 tot-seq=2

TATGAACGGGAGAGAAGGGTGCACAGTGAAAACACATCAAAGGATGGAATAGTGAATCA  
AGATAAACACCTATGCACAAGGAAAGAATTATCTATCGACTGCCTTGC GGATGTCAAACA  
CTGTCATAGCTGGCTGTGCTGTTAGAAACAGGCTGGGATGTAGCTGTCCCAACTCTTCTC  
TCCTGCAAGCTTCCACA

>4259 len=197 tot-seq=2

CCAGCAGGGTGTAAAGTAAGACACTTCCAGGTACCCTGTGGGGAGCTGAACTGAACTCAG  
GACACTGCCCCCTACCCTAGTCCACCTAGGGTGTCCCTCATAACATGCCTTCTGCAGACCA  
CCAAAGCATCTGAGCTCGTTTCTCCAGACAGGTTTTCAAGTCCCTAACCTTCAGCACCA

GCGTCCCCTCCACCATG

>4260 len=197 tot-seq=2

CAGGAGGATTAGAAATTTAAGATTACATTCAGCTATATGAGATGCTATCTAATAAAAAAT  
ATGAAACACCCAAAAGCAAGGGACTCTTCAATTAGCGAAGTCAGAGGTGCTGACAAAGGT  
GAGCAAATGATTTTTTACGTTTACTGGAAAAAATAATTAGGGATAAACTGAAAGAGGA  
TGCAGAAGCAGAGGAGA

>4261 len=197 tot-seq=2

CTGGCTGGCTCCCAGGATTGTAACTTTTAAGTTTTTCAAAGTCTAATTTAATGATGGTT  
CTTAAATGCTTTAAACCTCCCTTTAACCACCAGTGGTGGGAAAGAAAGGATCCAGGGG  
AAGTGGACCTGCTTAGAAATGGTTCTTGGAGCAAATTCTATCTGCGTTGTCAGGAAATCG  
GCAGTTGTTACAGGAG

>4262 len=197 tot-seq=2

CTGAGTGAATGGAGTTAAGAAGTGTGATATTAAGATATAATACGGGAGGAAGAAGTGGGG  
AATATTGAGAAATGGGGGAAAAAATGAAGAAGCGACGACGCGTGC GGATGAAGGCCTTC  
GGGTTGTAAACCGCTTTTGATTGGGAGCAAGCCTTCGGGTGAGTGTACCTTTGAATAAG  
CGCCGGCTAACTACGTG

>4263 len=197 tot-seq=2

CTGAGTGAATGGAGTTAAGAAGTGTGATATTAAGATATAATAAGGGAGGAAGAAGTGGGG  
AATATTGAGAAATGGGGGAAAAGATGAAGAAGAGAAGAAGAGTGAGGGATGAAGGCCTTC  
GGGTTGTAAACCGCTTTTGATTGGGAGCAAGCCTTCGGGTGAGTGTACCTTTGAATAAG  
CGCCGGCTAACTACGTG

>4264 len=197 tot-seq=2

GACGTGTGATATTAAGATATAATAAGGGAGGAAGAAGTAGGGAATATTAAGAAATGGGAG  
AAAGAATGAAGGAGAAAAGAAGAGTGAGTGATGAAGGTCTTCGGATCGTAAACTCTGTT  
ATTAGGGAAGAACATATGTGTAAGTAACTGTGCACATCTTGACGGTACCTAATCAGAAAG  
CCACGGCTAACTACGTG

>4265 len=197 tot-seq=2

ATTCATGTGTGACTGGAGTTCAGACGTGTGCTCTCCGATATAATAAGGGAGGAAGAAGT  
GGGGAATATTGGAAAATGGAGGGAAATATGATAAAGAAATTATGTGTGTGTGAAGAAGGT



TTTAGGAATGTAAAAAATTTTAGTAGGGAAGAAAAAATGACGGTACCTACAGAAGAAG  
CAACGGCTAAATACGTG

>4266 len=197 tot-seq=2

TAGGGAATTTTCGCAATGGGCGCAAGCCTTATGAAGCAATGCCGCGTGAACGATGAAGG  
TCTTATAGATTGTAAAGTTCTTTTATATGGGAAGAAACGCTAAAATAGGAAATGATTTTA  
GTTTGACTGTACCATTTGAATAAGTATCGGCTAACTATGTGCCAGCCAGCCGCGGTAATT  
AGTAGATCGGAATAGGG

>4267 len=197 tot-seq=2

GTGGCCAACATGCAGGAGATAGGAGTGACTCCTTTTACAAGTGCCCAAAGTCAACAGCTG  
ATGACGAAGCCAATTTTTATGGCCATGCTCTTACTAATGTCTTCTGTCAAATCACTTATC  
TCCAAGAAAGTAAGACAGGAGGTAAAAGAGGACAGGTCGTAGGGTCTGTGTAACCCACTC  
AATCCAAGCTTCCAGCT

>4268 len=197 tot-seq=2

TTCTTCAAAAAGAACTTGACTGGAGCACAGAACAGTTCTGATATTAGTTTGGAAAAAAT  
GTGGCTCCAACATTTACAAATGATATTTGGAAAAGGCATCTCATCTCCTAGGTCCTGTAC  
AAGAAGGGGTGTGGGGAACACAGGTAGAGGCATCCAAGCTCAGAGATGCTACAGTGGTGG  
CGCTGTCCACATCTACC

>4269 len=198 tot-seq=2

GAAGAGAGAGTACGGGACCTGGAGTGGGCTTCTGAAACCTCAAAGCCCACCTTCAGTAA  
CACACTTCCTCCAGTAAGACCACACCCCCTAATAGTGCCACCCCCTGGTACTAACATT  
CAAATCTATGAGCCTACCTGGTCCATTCTATTCAAACCACCATATATGCCTTGGGAGAT  
AGAGGCAAAATGATCTGA

>4270 len=198 tot-seq=2

AAATTACCAGTGACACGGAAGATGGTCAGACACATCAAATGACACCATAGCATGCAATC  
AGCTAAACCCAGAATGCCAAAAATCCAAGGGACAAATAATCCAGTTTCTCCGAAAAATT  
AAATGACAAAAAGCAAAAAAAAAAAAAAAAAAAGAGGAGAGGGAACCTATGGATAAAAGGGG  
ACTTAAAAGATATATCAG

>4271 len=198 tot-seq=2

CTGTAACAGGCCGTGTGGAAGTGGAGCTGACCTGTGGAGCTCTGTTCCCTACTACTGTT

TCACCTTTGTGACATGATGTGCCATGACAAGCGACCAGTCAGGGAGAGTACAGCTACCCC  
AGTTCTGAAAGGAGGGTGGTACTCTGGCCCACAATCAAGAGATGCCAAGGAGTGTGTGG  
GCTCCCATGGCAAACACG

>4272 len=199 tot-seq=2

TGAAAGCATTTTCTCTACATACAAGCCACCAGGGCCCATTTAATGTAATTAATTGTCTTT  
TTCAGTTCCGTGAATAGTACCCCAGAGATCTGCAGGAGTTAATGGACTTTCAGGAAGTAG  
GCTCTGCTCCCTGGCTCCCACCTGGCCCAAAGTCATTCTTGCCACTCTCATTCCAGGGTG  
TCTTTACTCATCTAGGACT

>4273 len=199 tot-seq=2

AGACGTGTGATATTAAGATATAATAAGGGAGGAAGAAGTAGGGAATATTAGGAAATGGGG  
GAAAAAATGAAAGAGAAAAGAAGAGTGAGTGAAGAAGGTTTTAGGATAGTAAAGCTCTGT  
TGTAAGAGAAGAACGTGTGTGAGAGTGGAAAGTTCACACAGTGACGGTAACTTACCAGAA  
AGGGACGGCTAACTACGTG

>4274 len=199 tot-seq=2

AGGAGCAATGCGAGTGACGCCAAGAGGCTCCGGAGCTGTTGACTCTTATGTGAATCATG  
AGCCCACTGTCCATTACACACGTATCTCTGAAGGAAGAGTCCAGCGTCTTCCTCATGC  
TACCCATGGTGGCAAAGCAACATGGTTTCTACCATCATGGAGTTTATATTCCAGTAGGG  
AAGACAGGCCAGTTCCATC

>4275 len=200 tot-seq=2

GGGAAGCAGTGTGATTTCTGGGCAAGAACTGCCAGTGAGCGTCTTGCTCACTTGTGACT  
TGCCCTTCTCTAGAACTAGCACACTGTAAAGGAAGGGACCGCTACGCCACCTCCTCCAAGA  
GCTGAGTGCCCCAGTGGCTCTAGCTCAGCCCGTCTCTGCCACGTCCAGCAGGGAGGTC  
CTGGCTCTCTAGGTGCTCTG

>4276 len=201 tot-seq=2

TATCTGGGGTGTCCAAAAGCTTGAGAATCTGTCATCCTCGGCCTTTGTGCAGGCTGGGAC  
CCCTGAGCCAACTCCAGCAGTTCCTTGGGGACCACAGACTGTGCTTCCCCACCCCTGGAG  
TGGGGTTCTGTGGCTTCTCATAGCCTGATGCCTGCCTGACATGAGGAAGGAGCAGTCAAA  
ACTTCTCAAATTCCACCTCAT

>4277 len=201 tot-seq=2

AGAAACTTGCCTCCAGATGTGTTAATATGATTATTAGGTAGAAACAGAAATGTAGAGTTA  
TTTACTGTGTA AAAATGTGTGTC ACTCCAAGAGTCTCCAAGAACTAGAGACCTCAGAGG  
ACTTCTTCTGGAAAAGCCCAGTGAGTCTTAAAGGCTGGGCAGAGAGATGCTCAGCAGGAC  
CACCTCCCTATTACACTCTTC

>4278 len=201 tot-seq=2

TGGAAGTCCAGGGTCCAGAGGGTCAGACGAGGAGAAGGGATTCTGGAGTGGCCTCCATAG  
GAAGGGCCCTGGGAGGAAGCTGGTCCGCGTGCAGGTGTGTTACTCACTGCTGCAGAAGCA  
ACTTGCTGAAGGGGTTGGCCCCTGACGCGGAGGTTTCGGAGCTCTAGAAGGCCCAGCACC  
TGCAGCCTGGGGGCTCACTGC

>4279 len=201 tot-seq=2

AATAGCTGCAGCACTGT CAGTGAGCTCCAGTGTCTAGCACCGGCCCTTCTGT CACATTCC  
TCCTTCTGATCACCCACCAACTTTGTCATTTGAGTCTTTGGGGTCTAGGGAACCTCACTC  
TGAAGGGGGGCAGCCTTGT CATCATTTATACATACCCCATTCATCCTCTCTGGGTAAAAA  
TCCAAAACCAGAAAAGAAAAG

>4280 len=201 tot-seq=2

TAGGGAATTTTTACAATGGGCGCAAGCCTTATGAAGCAATGCCGCGTGAACGATGAAGG  
TCTTATAGATTGTAAAGTTCTTTTATATGGGAAGAAACGCTAAGATAGGAAATGATTTTA  
GTTTGACTGTACCATTTGAATAAGTATCGGCTAACTATGTGCCAGCAGCCGCGGTATCGG  
CAGATCGGAATAGGGAATTTT

>4281 len=201 tot-seq=2

GACATTCGGTTTGCCTCACCTTTTGACGGACATTTGGTTTGCTCTCACCTTCGGCTAC  
TGGGGATTATGCTGCTATGTGTGCACTGGGGTGTGGGTCTGTGAAGTCTCTGCTTCAGTT  
CTTTGGTGATGTTCTGGGAGTGGAATGGCTGGGTCATGTGGAGATTCTGTTTAATTCTC  
TGGGAAATGCCACGTTGTTTC

>4282 len=202 tot-seq=2

TGCAGTTAAATCCTGGCAGGAGCAAAGCCTCGAGGCCCCAGTTTTAACCTTACTTTG  
TATCCCAATGCAGAAACCACAGCTTGCCCCAGCTGGCTGCCTGGTTCCACCTTTCTG  
ATTGATGGTGGCTAAGCAGTCACATGATAGGGCAGTCTAAAGAGTATAAACTCTGTTGGC  
ACAATGTCTCACACCTGTAATC

>4283 len=202 tot-seq=2

GGGCAGACGGGGGAGAGGAAGAGAGAAGAAGGGAGGAAGAAGGAGGGAAGAGGAAAAAAG  
GGAAGAAAGGAGGAGGGAGAAAAGAAGAGGGAGGGAAGAAGGGGGGAGGCGCGTAAAGCG  
CTGGTGGGGGGGAAGAAGGACAGGGGGAGGAACGGACCGGGGGGGGACGGGAAGCAAGGA  
GAAAGGCACGGCTAACTACGTG

>4284 len=202 tot-seq=2

CAAATACTAAGTCATGACGGGTAGGAGCTTGGATTCCAGATTTTCCAAGGGCACTAGGGG  
ATCCAGGGGCATAAGCAGCAGTGTATGTGTGCAGTCCTGGAGATTCGGGAAGTACAAATG  
CAGTGGCCAGCAGTGGGCAAGTAGTGGTCTGCAGTCAGTGCAATGATTAAGAGTTTAAAA  
GGAGGCAGACAATGGCCCAAAC

>4285 len=203 tot-seq=2

TCTCAGCCTATCCACAGACAGTGGTCATACATGGACTTCGAAAAGAGACTGGAGAGGTCA  
ACGAAGGGATGGTCACCCATAATGCCATCCTGGGTCTTGACTTCTCCTGGACCAGGTCTC  
CAGGAAAGCGCTAAACTCTGCACTCCACAGAGAAGCAAGAAAAGGCTCTGAAGGAACCTT  
AACTCGACACACAACACTACTAATC

>4286 len=203 tot-seq=2

AAGCCCATAGACTTCGAGGTACAGGTAGGGGGCTGGGAAGATAGCCTGGGAGCTGCAGTT  
GGCACCAGGGGTCCAGTGGTTCCACCCAGAGCGGGCAGACTGGCAAAGAGCAGGGGACC  
AGCCCAGGTGAGGAGCAGGGCCAGCCGAATGCTCCCAGGGGGCTGAAGTGGCCTCAGGAC  
TGCCATGTAGCGCTCCCCGTGCA

>4287 len=203 tot-seq=2

TGAAAACGGCCATGTTGCTACTTAAATGCTAAACCTTTAATGGTGTATTAATAGACAGTT  
ATTAAGTTGCAAATTAGGAGCTTAAATCTACATAAATCAGCTGTGTACTGACTGTATCTC  
ACAGTAACAAATTCACCCAATCTGTATCTTGTCTTCTTTGTAACAGTGTTAAATATTAGC  
ATATCTCGCTCTCAGGTGTGATT

>4288 len=203 tot-seq=2

CTTACTAGTGAACCTCTGTCAAATGTTTAAAGAAGAACCAATTCTTCACAAATTCTTCAA  
AATGTAAAAGAGGAGAAAACACTTCCCAAATTATTCTATAAGGCCTGATGCCAAAATCAA  
AGACAACACAAGAAAAAACAAGACTATTATGTGTTTTGAATATAAATGCAACAGTTCTC

AATAAAATATTAGCAAACCTGGAT

>4289 len=204 tot-seq=2

GTGGCCGTCAGGGGCCGGAGCTCCAGCAGGTGGGCAGGGCCAGCCCCGGCGCAAGGGAG  
CAGAAGCCAGAGGTGGCGAGATTTGGACAAAGTTCCTGAGGCCCTTGGTGACAGAGGATT  
CAGTGACAAGAGAACGGAGCCCAGAAGAAGAGGGGAACATCCCACAGAGACCCCCTCCTG  
AGTAAATGAGAGAATCAGACCAGA

>4290 len=204 tot-seq=2

CTAGAGGGAGAGTGGAATCAAGGGAGGGTGGTTTTAAGATGGAAGAAATGATACTGTTTT  
TGTGTATGTGAGAGTAATCTAGTAGAGAGACGGAAATGGGTGGTGTGGGAAAGATGAGAG  
AATTGCTTGAGCAGTCCTTGAGCAACGTGAGAGGATAAGGCCTCACGCCTAAGAGGGGAG  
ATACTCGACTGGCCATCGAGAGGA

>4291 len=204 tot-seq=2

AGAGGCTGACCACGGAGGAGCAGGAGAAGGTGGCCGTGCCAGAGGGGGAGAAAGTAGAGA  
CCCCCGGAGTGGATAAGGAGGGTGAAAAAGAAGAGCCGCAGTCGGAGAAGGTGTCAAAGC  
AAGGGCTGCCAGCTGAGAAGACACCTTCACTCTGTCCAGAGCTGACAACAGATGATGCCA  
GACCCCTGAGCAGGCTAAGCAAAG

>4292 len=204 tot-seq=2

CTGGGAACCCAGGAGCCCTTTGGTATTACTTGCAGGTAGAAAAGGGGAGGAAGCTGGGAT  
GAGGTGGGGAGGTCAGCGGGGGCCATGCTGAGGGCATGGGGCTGGTGTGGTGGGAAGAAA  
TTTTAAAGCAGGTGGAATGACATGGTCAGTTGCATAGACAGATAAATCACTCCAGCCCTG  
TAGCGGAGGGCAGATGGGGGAGGT

>4293 len=204 tot-seq=2

CCCAGCCGCTCTCTTGAAAATGCCATAGCAACCCCTGGCTGGTTGCCTAGCAATTCCTCC  
CTTTCCCTTTTCTCCCTAAAGCCCAAGCGAGTAGTCCACAGGCTTCTGGTGGAACAT  
GTCTCTGTGCCATGGCAAGTGCCTGTGTGTGTGTGTGCGCACTCATGTGCGTGAGAGGAC  
AGATCCGGAAGGGAACAACCTTCCTG

>4294 len=204 tot-seq=2

ACGGCATAACGAGATGCGATAGTACTGGAGTTCAGACGTGTGCTCTCCGATCTCCTACGG  
AGGCAGCAGTGGGGAATCTTGACAATGGGGGAAACCTTGATGCAGCGACGCCGCGTGAG

CGATGAAGGTCTTCGGATCGTAAAGTTCTGTTGCAGGGGAAGATAATGACGGTACCCTGT  
GAGGAAGCCCCGGCTAACTACGTG

>4295 len=204 tot-seq=2

CGTGAGCATCACACGGGTTTCAGCTTCTCCAGAGCGTTTAGGAAGGCGCCTTACTTGTCAC  
CAGAGTCCCGGGAGGGCAGGCCTGGTCTATATCGACAGGGCAGCAACCCACTGCCTACGC  
AGTGCCCGGCTCCAGCACACCAGGCGGCGGTTCAGAGGGCAGCAAGGCGGCCAGCCCTGAC  
CCTTCAGCACAAGCCAACGGCCTG

>4296 len=204 tot-seq=2

TGGGGAATATTGCACAATGGGCGCAAGCCTGATGCAGCCATGCCGCGTGTATGAAGAAGG  
CCTTCGGGTTGTAAAGTACTTTTCAGCGAGGAGGAAGGCGTTAAGGTTAATAACCTTGGCG  
ATTGACGTTACTCGCAGAAGAAGCACCCGGCTAACTCCGTGCCAGCAGCGCGGTAATGCGT  
AGATCGGAAGAGCGTCGTGTTGGG

>4297 len=205 tot-seq=2

GGCAGAGAGTTGCATGTGCAACTCAAGAGTTCAAGGAGACCTCTACAAGCCTTGGGCCCT  
GGAGCAGACCAGCACTGGTATCACAGCCCCAGTAGAGGCCATATATTTGTGGCACCTGGG  
AGCAATAAAAATTGCTCCACCTCCTTACCAGATGGGGCTCAGTGCCAGCTTCTGACTCAG  
TGGTCCTGCTATGGCCTGAACTTGG

>4298 len=205 tot-seq=2

GTGGAGCTCTGAGTGGGGGAAGGCGGTCTGTGGGAGCCTCGTGTGTCAAGGTAAGAGAT  
GTCTCCCTTACTTTGTAAACATGTTTAACCATGTTATAAAAAGCTGTTCTAAACCGTCAGA  
CGTGGGATCTAAACAACAACAAATGTTCTGCAGTTGGCTGATCTGGAAAAGTGAGCAAGCC  
ACGGTGACTCCCCCTCCTTGTGTCC

>4299 len=206 tot-seq=2

CAGGTGGATGTAGGCTCCTAGATTCCTTGCTTACCAGCACAGTGATTGCGGCCACAGCA  
GCACAGTGATTGTGGACTCTGGGGCTGGAGGAGGCAGCAACAGTGGTGTGACTTTGGGCT  
TCTGTAACAACAGCAGGAATGCACTCCTCCCTGCAAGGTGATATGTGCAGTGATTCCAA  
TGAGAATCATAGCAGCAGTGGAGGCT

>4300 len=207 tot-seq=2

TCTGAGAAGGCTTTATAGAGGCAGTAGGAGGTAGAATAGAAGGTAAGATGTGAGCCGA

GGATTAGAGATGAGTAGAAATAGTCCTGGTGAAGAGGGAGAGGAAGGAGGTTGCTATTTTC  
AGAGAGGAGGCTGGAGATGTCACGCACAGGATCTGCAAGAGCCAGGAGGGCAAGATATAG  
GTTGCAGAGATGAACCAGGTCAGCTCA

>4301 len=207 tot-seq=2

CAGAAACGGCACACCTGGGCACCTGCATCATCAGTGAGGTCAGAGGGAGCCACCTGGGGA  
CCCAGGAGGCTACAGGAGGAACTTCCAGGAGAATTCGGGTAGGGACGTCAGCATGGGGCT  
CGCACAGGGTCCCTGGCAAAGAGGAGCCATGGGGGAGGATCCGGCCCCAAGCTGTCCTC  
TCACACAAGGCTGTACATCAGCCGACA

>4302 len=208 tot-seq=2

TGGGGAATATTGCACAATGGGCGCAAGCCTGATGCAGCCATGCCGCGTGTATGAAGAGGG  
CCTTCGGGTTGTAAAGTACTTTTCAGCGGGGAGGAAGGCGATAAGGTTAATAACCTTGTCG  
ATTGACGTTACCCGCAGAAGAAGCACCGGCTAACTCCGTGCCAGCAGCCGCTAATAGGGA  
GATCGGAAGAGCGTCGTGTTGGGGAATA

>4303 len=208 tot-seq=2

AGTGGGGGCAGGCTGGGGCGGATGGAGGAGGCCTGTTCTGGGGAAGGCCGAGAGGGGTC  
CTCTGGCATAGCTCACTGCTGACCCCATTCAAAGGCTTTTCTGAAACGATGTGGAGAAA  
GTGCTGAAAGAGCAGAGACATGATGGGAAGTGGATGCCAGCTTGGGGGCTCAATGCTCC  
CCTCAGCGTTCTGGGGCCTTTGGAGTTC

>4304 len=208 tot-seq=2

AATCGCTTGAGCCCGGAGGCGGAGGTTGCATTGAGCAGAGATCACGCCACTGCACTCCC  
GCCTGGTGACAGAGGGAGACTCCGTCTCAAATAAAATAAAATAAAATAAAATTTAAC  
AAAAAAGGTAGAGGCAGCTCTCAGGTGAGTAAATTCGCAGATGCCACGCATGTCTGGA  
ACATACCCCAGGGGTCATTAGAGACTGC

>4305 len=208 tot-seq=2

AGATTCTGTCAGATGATGTATCGTCAACAAAACCTCAACCTTCCATTGCTGGCTCTGAAGA  
GGGAAGGGGTCATGAACCTAGGATTGCTGTCAACCTCTAGACACTGGAAAGGGAAAGGGA  
ACAAATGGTTTTTCAAAGCCTCCAGGAGGACCCAGACCAGGGACACCTTGATACTAGCCC  
AAGAACAATAATCAATAGTCTGACTT

>4306 len=208 tot-seq=2

GCAAAGAGAGACAGCTTGGCAGGGAACTCCCATTTTTAAACTATCAGATCTCATGAAA  
CTTACTGACTATCATGAGAACAGCACGGAAAAGACCAGCCCCATAATTCAGTTACCTCC  
TACCAGGTTTCATCCCATGACACGTGGGAATTGTGGGAGCTACAGTTCAAAGATGAGACTT  
GGGTGGGGACACAGCCAAACCACATCAG

>4307 len=208 tot-seq=2

GAGCTACAATGCAGAAAAGCCATGGATTAATAGGAACTGAAGCGCCGGGAGCCATGAAGC  
TGCAGGACCCATGAGGCAGAAAAGCCATGGGCTAGCATCGAGGGGGGCAGAAAGAAGTT  
AGTCAGTAGCAGTGGGAGGAGTATAAATACAGCCAGAAAGGAGTTGAGTCACCAATTTGG  
GAAGCACTAGAGAAGGGAGCAACAGATG

>4308 len=208 tot-seq=2

CAGTTGTTAAAAGTGCAGGTGAGATGACATTGCCACTTAGGTGACAGCCGACAGCAATGA  
TTTCCCTGCCTAAAAGAGACCACACCAGAAACAATGCTGTGCAGATGCAGGCAGAGGCT  
ACGTGACACGGTGTGGCATGTTGGGACAGGAGACAGACGTGGAGACTCTGGGCATTCTA  
AGAAGGGGGTTCCTTCAGACTACACATG

>4309 len=209 tot-seq=2

TACACATGAGACCCCAAGGACTCACCCCTGTCAGCATATTAAACAGTTGTATTCTGAGGA  
AATTCAATTAACACCAAAGAAAAATACTCGTACACTCACAGTGGAAGCTCGGCCAGCG  
CTGTGCTGGCAGCAAAGATGAGGTAAGAGGAAGCCAGGTAGGTCAGAGCGAGTTCTAGAG  
ACCTGACCCAGGAGTTCTAAGTCTGAGGT

>4310 len=209 tot-seq=2

GTAATTTTGATCTTGTGTTTGGATCAAATATAGTACAAATCAAACACAATTGGTGTGAG  
TGCATTTAATAAATGAAGTCTTGACCATTTGTGTGTTGCCAAGCTCCAAAAAGCAGTCTG  
ATCATTTCATGTAAGTGCAGGGTCCATTTATTTCTAATCATCCTAGCTTAACTTCATTTAA  
AGAATAAATTAATCGTTTTTAACTTATG

>4311 len=210 tot-seq=2

ACAACCTTAACTTCCCTGTTAGACAGGGTCTTTTCAGCATCCTTTGAGGGTCTCCTC  
TTAGAGTGGAGAGGAAGGACTGAGGCTTACTGTACTGTGTGTCGGGAGTCCCTCTACAGA  
CCCTTCCGGCTTAGCAGTTGGGGAAAGTGACGCAGGGAATTTAAGACTAGCAGGGAATCC  
ACCAGACCCACTTCTGCTTGTGGTTTCAG



>4312 len=210 tot-seq=2

TGGGGAGGTGAGGACTAGGATTTGGAGTCAAATAGACCTGGGTTTGAATCTCAGCCCCA  
CTACTTATTAAGTGTGTGACCATGGACCTATATCTCTGTGAAACTGATAAAATAATAGTA  
TCCACCTCATTATCATATGTCAGGCACTCAGCATAGCAGCAGTGATCAATGGCAGCTCAT  
ACTCCTTATTAGACAATCCAATCATCTGCC

>4313 len=210 tot-seq=2

GATCACTTGAGCCCAGGAGTTTGACACCAGACTAACAAGAGAGCCAACATAAGTGACTG  
GCCCTTCTGAGTGGTAGCCTCTCAAAGTTTAGACGTCAATGAAAGAGAAGGAAGAAACAG  
AAGTGTGGCTGTGTCTGGAAGATGAGAGACAGGGGGTATCTAGAGAAGACCAACTCCTG  
CCTCATGGATTCTGTCGGTCAACATAGCAA

>4314 len=210 tot-seq=2

GCAGCCTACTGGTCAGCCAAGGGGTCTCCCTGAACCTGTCTCCTCCTGCAGCCCTGGGC  
TCCCCACTTCCCTGTGTGTGTGCCTTTACCTGACAGCCAGGCCTGGGGTGACACACAGT  
GTGCGCTTTTGTCTTGCAGGGCCATGGGTGTCATCTCCTACCTCAGGTGAGCAGAGCCCT  
GCCCCATCAGCTGCCTCCTCAAAGCTGAC

>4315 len=211 tot-seq=2

AGCCACAAGACTGTATCATAGCACCCCCACAGTACGTAACAACCTTCTGCATCCAATA  
TCGTCTCAGCGACTTCAGTACAGAATTTCCAGGTAGCTACAGGACAGGTGGTTACCATAG  
CTGGTGTCCCGAGCCACAGCCCTCCAGGGTAGGATTCCAGAACATTGCGCCCAAGCCAC  
TTCCTTCTCAGCAAGTTTCACCATCAGTGGT

>4316 len=211 tot-seq=2

TGGGGAATTTTGGACAATGGGGGAAACCCTGATCCAGCCATCCCGCGTGTATGATGAAGG  
CCTTCGGGTTGTAAAGTACTTTTGGCAGAGAAGAAAAGGTACCTCCTAATACGAGGTA  
GCTGACGGTATCTGCAGAATAAGCACCGGCTAACTACGTGCCAGCACCGCGGTAATATTA  
AGATCGGAGAGCGTCGTGTAGGGAAAGAGTG

>4317 len=211 tot-seq=2

CAGGAAGATCGGGAAGTTCAAGGCCAGCTTGCTCTACAAAGTCAGACCCATTTCTCAAAA  
GAAGGAAAAAGAAAAATGAAAGAAATGTAATGACTAAAAGTGGACAGTCATCCTTGACTG  
CATAGTGAGTTCAGGGTCAGCTGGAATATGTAGGACTCTGTCAAAATAAAGATGATGACT

ATACCTGTATGCAGGTGGCATTGGAGATCCA

>4318 len=211 tot-seq=2

TGGCGTGGCCTGCGTCGGGGCTGGCCACCTGGGTGCCAGAGCATTGCCCCGTGGGAGATGG  
AGATGTCTCTCCCGGTCCAGATGTCCAGGGATCAGGTGAAAATGATGAGAGGAGCCTGG  
GCGGCCGGGCTCCGCCATAAGGGCCAGGTGCGGCCCCAGGTGGTGCTTCCTCTCTGACCT  
TCCCTTGCCGCCTAGCATGGCTCCCCGCATG

>4319 len=211 tot-seq=2

GCTGGAGTGCAGTGTGGCGTGATCTTGTCTTACTGCAATCTCCGCCTCCCGGGTTAAAT  
GATTCTCTCTCTCAGCCTCCTAAGTAGCTGGGACTACAGGCATATGTACCCTCTTTTTA  
TAATTAAGATTTCTTACCAAAAATCCAGATGTCCAGCTTCTGGTGGACACAGAATATCT  
GAGAACAGTAGCTGGCATTCCCATGCGGCAA

>4320 len=211 tot-seq=2

CCGACCTTTTAGTCGGAGAAACGTGCACGGGCGAATAGAGGAAAGGTGGTGCGGGCACAC  
GTCCGGCGTGTCTCAGAGCTACGGCATCACTCCTCAGGGCCACACGGCCTGGCGCGTCAG  
AGAGCTGCAAGTGCGCCGACGAACTTATCCAACGCGGGACGAGTGTTTCGCAGCTGCATCG  
TCAGGAACGTTCTCCGTGCCGATCACGTAGA

>4321 len=212 tot-seq=2

AAGAAGGTATGTGAGTCATTGTGGGCTAGGAAGGTGGCTATGTCCAGGCCCCCAGCTGCA  
GCCTGGCTGGCAAGCTCAGGTGTGACCCAGGCCCCAGCAGCCTCTGTGGGCCCATCCTGC  
CCATCGGTGCCACCGCTCAAAAACAGCACATCTATCGGCCCCAGCGGCCACCTTCTCAAC  
TCTGCTCCAACACGCAGGGCCAGTTCCTGGTT

>4322 len=212 tot-seq=2

CTCGTGAGGCAGGAAGCCTGGAGAGGGAAGAGCTTCCGGAAAGACAAGGTTGGTCACATC  
ACATGATATAGGAGATTGAGTCAAACGAGGACAGAGAAGTGAACACTCGCTGTGGCCACA  
TAAGGCATCAGTTACCAGTAGAACCATCTCATGGGGTATGATGGAGACAAGAACCCAGGT  
AGAGAGGCTCTAGGAGAGGGTGAGAACGTGAG

>4323 len=212 tot-seq=2

CAGGAGGAAGAAGAGAACTTTCTCCCACTTTGGAGCTAGAAGGTGGGTCTTGAGCATAAT  
GCTCAGATAAGGGAAGAGTCCCAGGTAGTCTCGTACATCTATTTACCCAACCTCACTCAC

CTCCGTAGCAATGCCTCCTGCCCTCCAACCTCATCAACTCAACACCAGCTGCCAGACTTTG  
TGCCAGGCACCAACCAGCAGAAACCAGTGAGG

>4324 len=212 tot-seq=2

CCTGCACCCCACTAGATCAAGGAAATACACACAAATCACACAGAAAGATGATCTCACAAA  
ACGACTAACAGGACTGAACTATTTAACATTAACAGCCCAGGAAAGGCATTCTAACTCACT  
AGATCAACAATGAAAAACAACAGACGTCGGTGTCCCCACAGCCAGTCACTACCTTAATA  
ACAAGCTGTATGTTTCAATTCCAATCACAGCC

>4325 len=213 tot-seq=2

TAGGGAATCTTCCACAATGGGCGCAAGCCTGATGGAGCAACACCGCGTGAGTGAAGAAGG  
GTTTCGGATCGTAAAGCTCTGTTGTTAAGGAAGAACGAGTGTGAGAATGGAAAGTTCATA  
CTGTGACGGTACTTAACCAGAAAGGGACGGCTAACTACGTGCCAGCAGCCCGCGGTAATA  
GCTAGATCGGAAGAGCGTCGTGTAGGGATAGGG

>4326 len=213 tot-seq=2

TAGGGAATTTTTACAATGGGCGCAAGCCTTATGAAGCAATGCCGCGTGAACGATGAAGG  
TCTTATAGATTGTAAAGTTCTTTTATATGGGAAGAAACGCTAAAATAGGAAATGATTTTA  
GTTTGACTGTACCATTTGAATAAGTATCGGCTAACTATGTGCCAGCAGCCGCGGTAAATC  
GGAAGAGCGTCGTGTAGGGAAAGAGTGTGCCAA

>4327 len=213 tot-seq=2

CAGAAAACCCAAAATAACATTGGCTTATATAAAAAAAGAGTTTACATTTGTTTCCTATT  
AAAAAAAAAAGCAGTTCAGAGCTGATCCCGTGGCTCCATGTTTCATCAAGTACCCAGGTG  
GCTTCTCAGTTGCTGTGCCCTCCTCAGCATGCTGCTTCTGTCTCATGGCCCCAAAGGCTT  
GCTCTAGTGCTGCCTGTTACATCCACGTTCCAA

>4328 len=213 tot-seq=2

GAGTTCAGACGTGTGCTCTTCCGATCTCCTACGGGAGCAGCAGGGAGACACAGAGAGTAG  
AGAGGAATAAAGCTGGACACCAGTCTGTCTAGGTTCAAGTGCAGGAGAACCTCTCGGACAT  
GGAAAAGGGTGAGTGAATGAGAGTCCCCTGAGGAATTCACACTTTCCATAGGGACCTCTG  
CAAGACTGGAAACGGGAGAATCCCCCTGGACTC

>4329 len=213 tot-seq=2

TGGCAGAGACAAGGACTTGTTCTCCTATATGTTTGTGGAAGGTGGGTGAAGAGAAGGGAG

AAGTGACGGCTGCTTCCCAATGCCTTTGAGCTGTGGGAGGGGGTTTTAGAGGTATTAGT  
TATCTAGGCTTCCTTGGGATGGCTCAGAACTAAAGTGCCTTTGCATAGCATTGCTTCT  
AAAGGCAAATGAAATAGAAATGATAGATAAATT

>4330 len=213 tot-seq=2

CCGAAGTTTCCATAAACGGTACAGAACCTTACGATGGACTGACGATTACGAAGGGCA  
GGCACCATTACCAACCCTGCAAAGAACTGAAATCCAGCAGGAACAGCAGAAGGAAACAG  
CAGTGCCTAGACGACCCAGAAAATAGAGAGAAAAGAAAACCTCAGTAATCAACTTGAAAAT  
GACAGCAATAAAGTCATTAGCCATGTCACGAAA

>4331 len=213 tot-seq=2

TGAGCCTAGACAGTGGCTCCAGAGGCATTCACTAAGAAGCAGAGACAGCTCAGGTTAGAA  
GCACTGTAACACTCACTAAGAGCCCTGGCTAAAAGTGGTGCCTAAGTTGAGTGACTCCAT  
TTTCAAAGCAAGCAAGAAGAGTGAAGCAAAGTTTACTGATGCCAGACTGTGTGTTAGGT  
ACTTACTAGCATGGGTCAGGCCATTCAATCTTT

>4332 len=214 tot-seq=2

GCTTTTCTGTGTTTCTGGGAGAGAGAGAATAACTATTGTCCAGAGGCCACTTTTCTTCC  
TGCGTTGACTGACTTGAGAAAATGGAAGAGCCCAATCTCTGGGTCTTGCCCAAAGCCTTT  
CAGTTTGTAAATTGGTCCCTCAGACAGGGCCTCTGAGTGGAAAGCCAGGGCAGTGTGAC  
CTCTCTAAATCAATAGTCTTTAGAGGGGGAATTG

>4333 len=214 tot-seq=2

TGGGGGATATTGCACAATGGGCGCAAGCCTGATGCAGCGACGCCGCGTGAGGGATGACGG  
CTTTCGGGTTGTAAACCTCTTTCGCTACCGAACAAGGCTCCATTTTTGTGGGGTTGAGGG  
TAGGTGGATAAGAAGCGCCGGCTAACTACGTGCCAGCAGCCCGTAATCCGTAGGTAATA  
GCCAGATCGGAAGAGCGTCGTGTAGGGAAAGAGT

>4334 len=214 tot-seq=2

CAAGTGACTGGAGTTCAGACGGGGGCGCGGCAGAGCGCCGACGGGAGGCAGCAGGGGGGA  
AGAGGGCACAAGGGGCGCAAGCCGGAGGCAGCCAGGCCGCGGGGAGGAAGAAGGCCGGCG  
GGGTGAAAGTACTTTCAGCGGGGAGGAAGGGAGTAAAGTTAATACCTTTGCTCATTGAC  
GTTACCCGCAAGAAGAAGCACCGGCTAACTCCGTG

>4335 len=214 tot-seq=2

GGCATACGAGATTAGGCAGTACTGGAGTTCAGACGTGTGCTCCTCCTACGGCAGCAGTG  
AGGAATATTGGTCAATGGGCGAGAGCCTGAACCAGCCAAGTCGCGTGAAGGAAGACTGCC  
CGCAAGGGTTGTAAACTTCTTTTGTATGGGATTAAAGTCACATACGTGTAGGTGTTTGCA  
GTTACCATACGAATAAGCATCGGCTAACTCCGTG

>4336 len=215 tot-seq=2

CCTGGCACAAACTGGTATGGGTGCTGGTGGTAACTGGAAGAAGCCTGATCTCCTCTGCAG  
ATGTGTCTCAAAGTGGGACAAAGTGATTGCTCTGTGTAATTAACCACCAGGGACGCAGCA  
GAAGCCCTGAAATGACTCAGAGGATTGTCTGCACATGGGGTTGGAGAGGCTGCAATTCTT  
TAACTTTCTTTAGCTGTGTTGAGACTTCCAATAGC

>4337 len=215 tot-seq=2

TAGGGAATTTTTACAATGGGCGCAAGCCTTATGAAGCAATGCCGCGTGAACGATGAAGG  
TCTTATAGATTGTAAAGTTCTTTTATATGGGAAGAAACGCTAAGATAGGAAATGATTTTA  
GTTTGACTGTACCATTTGAATAAGTATCGGCTAACTATGTGCCAGCAGCCGAATCGGGAG  
ATCGGAAGAGCGTCGTGTAGGGAAAGAGTGGGCTA

>4338 len=215 tot-seq=2

TGGGGAATATTGCGCAATGGGGGAAACCCTGACGCAGCGACGCCGCGTGCGGGATGAAGG  
CCTTCGGGTTGTAAACCGCTTTTGATTGGGAGCAACACCGCGTGAGTGAAGAAGGGTTTC  
AGCTCGTAAAGCTCTGTTGTTGGAGAAGAACGTGCGTGAGAGTAACTGTTACGCAGTGA  
CGGTATCCAACCAGAAAGTCACGGCTAACTACGTG

>4339 len=215 tot-seq=2

AATGCCTGGCACATGGTAAACAGCCAGTACAAATTACTATTTATTGCGGTTGCTGTTATT  
ACTAACCCAGTGTAGGTCCTGTAACATCTCAGCTTTAGTTTCTTCTCCTGTAAAGGGAAC  
AATACTAACACCTCCCTCATAGGTAAAAGTCTAATGAGATGAAGCAGGTGAAAGCACTTT  
ATCAACTGGGGTTATAAACTAGGTACTCACAGCCT

>4340 len=215 tot-seq=2

AGCCTGTCTGTGAATTTCCACATCAGAACCACCAGGGGGAGCTCACTCACACAGGAATCC  
CAGCCCATCTACGAGGGGATGGTGGGAAAAGCAAACCACTTTCTTCAGTAAGAATGACC  
CTTCTGCACGTGGATGAATTATCGCACATAAGCGACAGCTTACTGACAATGGTGGTGAGA  
TGAAGAGCCCTTGAGAAAATGTATTTAGAGAAAGC

>4341 len=216 tot-seq=2

AAAGAGGGCCTCAAATCCTCTGGAACCTTGGTTACAGGTATTTGTGAGCCTCCTAATATG  
GACCTGGCAACTGAACCTGGGTCCTTTGATAGAGCAGTAAGTACTCTTACCCACTGAGCC  
ATTTTTCCAGTCGCTGTCATTGATTGTGTCATAGATTTGCCCATGATAGCTCTTTAGTGA  
GAGCACTGGCAACAAAGTAGGTGCCACTTTCCGTCC

>4342 len=216 tot-seq=2

AACAAAGACAGAAGATTACTTTAGGTTATAAGACTTCAGTGGTGAGGTGTAATAAGAAAT  
CATGGTACATGAAAAGGAGCACTGGGGAGCAGAAGGTGTGAACCAGAATCAGACATAGCA  
ATGGCTTTGATCCTGACAGTGTATCTACTGGCAGAGGATTTTATCAAGCAATAGAAAGCT  
AAGACAGCATACTTCAGCCTTTTGACCTTCACTCTG

>4343 len=216 tot-seq=2

TAGGGAATTTTTACAATGGGCGCAAGCCTTATGAAGCAATGCCGCGTGAACGATGAAGG  
TCTTATAGATTGTAAAGTTCTTTTATATGGGAAGAAACGCTAAAATAGGAAATGATTTTA  
GTTTGACTGTACCATTTGAATAAGTATCGGCTAACTATGTGCCAGCAGCCGATAATATTA  
GATCGGAAGAGCGTCGTGTAGGGAAAGAGTTAGGGA

>4344 len=216 tot-seq=2

CGGTAGTGACTGGAGTTCAGACGGGGGCGCGGCAGAGCGCCGACGGGAGGCAGCAGGGGG  
GAAGAGGGCACAAGGGGGCGCAAGCCGGAGGCAGCCAGGCCGCGGGGGGAAGAAGGCCGG  
CGGGGTGGAAGCACTTTCAGAGGGGAGGAAGGCGTTAAGGTTAATAACCTTGCGGATTG  
ACGTTACCCGCAGAAGAAGCACCCGGCTAACTCCGTG

>4345 len=218 tot-seq=2

GAAGTAGGCAAATCTCTGTCAGGCCAAGGCTAGCCTGGTCTATGCAGCTGGTTTCTGGCC  
ATCCAGAATTACCTAGTAAGAACCCATCTCAAATAAAATGCACTTCCCACATCCCAAGA  
GGAGGAAGAAGAGATTCTGACTCTCACTGTCCACTTGAGAGGGAGAGAAACCCTCTGTAT  
ACACACATAAATGCTCCCAGCACCACTCTGAGCCACGG

>4346 len=218 tot-seq=2

TAGGGAATTTTTACAATGGGCGCAAGCCTTATGAAGCAATGCCGCGTGAACGATGAAGG  
TCTTATAGATTGTAAAGTTCTTTTATATGGGAAGAAACGCTAAAATAGGAAATGATTTTA  
GTTTGACTGTACCATTTGAATAAGTATCGGCTAACTATGTGCCAGCAGCCGAGCCGCGG

TAATATTGAGATCGGAAGAGCGTCGTGTAGGGAAGTTT

>4347 len=218 tot-seq=2

CAGTCTGAATGACCCCTTTCCACAAGTCTTCTGTGACCACTACAAGCAATCCCTCCTCCT  
TCTCATTGCTTCATGCAATTATTTTCTATAGAAATTGCTCAGCATCCTCATTGCTCTGT  
AAATTATCTTTTTATAACAATTATAGATGCCACATGTATGCTTAATTAGCTCGATGAAGA  
ACAGAATAGCACATTGGTAAGAGCATGGTTTGGGGGGT

>4348 len=218 tot-seq=2

TAGGGAATTTTTACAATGGGCGCAAGCCTTATGAAGCAATGCCGCGTGAACGATGAAGG  
TCTTATAGATTGTAAAGTTCTTTTATATGGGAAGAAACGCTAAAATAGGAAATGATTTTA  
GTTTGACTGTACCATTTGAATAAGTATCGGCTAACTATGTGCCAGCAGCCGCAATATCCA  
GATCGGAAGAGCGTCGTGTAGGAAAGAGTGTGCTAGGG

>4349 len=218 tot-seq=2

GGGTCACCTCTACCTCCAGCCCTTGTTTCAGAGGCCCATATCCCATACCCTTGACCATTC  
ACAATAGAGGGACAGAGGTGAGGCCGATGGGGATTGGGAGTGGCTTAGTGCACAGGGAAG  
AAGTCAGGCTGAAGAACAAGCAGCCCTTCCCCTGCCCTCCAGGTCTAGGTCAGGCAGGG  
CACAGGCTAACCTCCAAACCCAGATGGGGGGTATGGAG

>4350 len=218 tot-seq=2

GGAGGCTCAAAGCAGGAACTCCAGCCATGTTTGCAGGAATTGTAGCAATATCGTTCATGT  
ACATAGAAAGTGGATCATCCATCTTCTCGCCAAACTTAAATGCCGTCGTAGGGCTTGTTG  
GAGAAATAAGAACATCTACTTTCTTAAACGCTTCTTCGAAATCGCGAATAATAAGCGTAC  
GAACTTTTTGTGCAGAACCATAACCATGCGTCGTAATAG

>4351 len=218 tot-seq=2

CCTGGGCTGTGTGCCACTGTTAACACCTGGCAGAGTTCTCGAGCCTCGGGTCTCAGGGTG  
CCCTCACTGCCTGTTCTCCACTGGTTCTTACTCAGCACCTGATCCTTATCACAGCAACCA  
CGGAAAACCCAGCCTCACAAAATCTGGCGTCCACGTCGGGAGTGTGGTTCCATCCACTGC  
GAAAGCCCCACACATCTCCCCGGCCTTTCATGTGGAGC

>4352 len=219 tot-seq=2

CAAAGCATGCGAAGAAGGTGTAGGGTCCCCAGCAGACGCAGTACGCAAAGATCATCACCA  
CCACCATGCGCGTCACTTCTTCTCTGCCTTCTGGGTGGATTCAGACTCTTCTGCTGCT

TTGCCACCTAAGGGAGACAGGGATAGTGAGTCGGGGGTTGGAGGGCAGCAAGAGGCAGGT  
GACCCAGGCATAGGGAGTTGTGGGGAGGAGGAGAGGAGC

>4353 len=219 tot-seq=2

GGTCCTTGAGGGAAGTAGGCTCTCCTTGAAGGATAAGCAATGGCTGCATGAAGTAGCAGG  
TATTGAAGCTAGGGCTTCGAAGGATGAATAGGAGCTTGCCAAACAAAGAAGGTGGGACAT  
GCAAACCAAGTGGAGGGACTGTGGCCAAACTCAGGGATACATGGATGGAGTAGCAGGAG  
AAAAACAGACTGGGGGAGCAGGAAGAGTCAGTGTGAGCT

>4354 len=220 tot-seq=2

AAGCAATGGCTGTGGGCTAGATGAAAGGGTAGGAACTCCTGCAGCCCCAGCGTTTCATGA  
GGAATATAGTCTGGCTAGCACAGTGACTTGGCTTTTCTGTCCCAAGACTCATGCTCAGA  
GCTGCATGCCCTGCTCTGGCCACTGTCTGAAGCTGCCAGCTCCCAGGCCACAGGAGAGG  
CAGGGAAGAGAGGCAGAACAGCCCTACTGTGAGCCTCCTA

>4355 len=220 tot-seq=2

GGAGTTCAGACGTGTGCTCTTCCGATCTTCTACGGGAGGCAGCAGAGGAAGTCCTGATGA  
ACTAGGAAACAGAACAAGGACATCACATAATCCTCATGGACAAAGCCATTCCACATTACG  
GAGGTGGTCATGAGTCACTGTAGGGCTGGGGAGGGGGCATCAGATGGCCCAGACCCAAA  
CAGAGTGAGGGGTGGAAAGGTATCCTACGACTCCCAGGAG

>4356 len=221 tot-seq=2

TTTTACTTGGAGAGTTGTACAGAGACAGACAGGTTGAAGAGAGAACAAGCCAGACACAGG  
GAAGACAGAATGAACCATCGAAGGAGAAGAAACCAGAAGACTGGAACAGATTGCCATAGT  
TAGTATGAGGCCAAGCAGAGCATTTC AAGAGAAGCAGTGAGAGAGAAGCCAGATTGACTC  
AGGCAGCTTGGAGAGGAGTTTAATTGTGCTGTGTTGACCAG

>4357 len=221 tot-seq=2

ACAGGCATCAGGGGTTAGCTGTGACCTTTTGTTCCTATTATTAGATCCTCAGCAGCCATC  
TGTCCCATTAGCCTCCAGCTTGTGGTGGTGCTTGGGCCTCACCAACTCCTGGTACCTGGC  
CAGGGCTAGGGTGTGGTCAGGCTGTTGCCAGGAGCCCAGTTACCAACCTCAGGGTAGGG  
CTGCCACCTCCCAGCCTAGAAGGCCATGAGTCACCCTTCCA

>4358 len=221 tot-seq=2

CAGTCACACAGGATGGGAGCTTGAATCTCCCGATCTCAGCAAGGCAGGGATCTATGAAGG



CATCCAGGCTCTACCCTCTGGGTGGCTCCACACCGAGTGCTTTTCCCTCAGCTCTTTGAG  
GCCAGCCAGCACCACCAGGAGCCCCTGGCACAGCTCACAAAAGAAAAAGCAAAGGCCAGG  
CATGCACACGGGGAAACACAAAAGTAGACACCTCCCCCAGG

>4359 len=221 tot-seq=2

ATGAGAAGAGTCACAGCCAGTCAGGTCAGAGTCGGGTCCTGCTCCGAGGATCCCCAAAGG  
AGGTTTGAGGGAAGACTCAGCTGGCTCGACTCAACCCCCTTAGTGAGAACAACACTCACGG  
GAAGAGGAACATCAATGAGGCCAGGAATGACAGAGGGAAAGAGGCGTCTGGAGTCACGAA  
GGGGCTTTGGGGTCTTCACAACACCCCAGACATGGGCGTTG

>4360 len=222 tot-seq=2

ACCCTTCTGTCTTTGTGACCACATGTGGCTGTCTGGCACTTCTATCCCAGGGCTCCTCA  
TCTAGGGGAGAGGTCACAGTCCAGACACCTCTGATTCTGACCCCATCCTTCTTCTGGCCC  
CAGGAGGGAGACTGGAAAGCATCTTCTTATCTAAGCACCTTTATTCCCCAAAGCCTGCAT  
GTTGATGATGCCGACTCATTGCCAGGCCCCGCGTTCACATAC

>4361 len=223 tot-seq=2

GACCAAGACAAGCTAGCAGTTCTGGAGCAGAAGCCCAGGGTGTACAGCCAAGCTGTCGG  
CTGTCGTGGACATGTAATGTCATGAGCTGGCCAGACGTCCACGTCAGAATGCTAACATTT  
GCATGTTCTTAGTGAGCTCTGATCTTGAAGTCTGCAAGCCACCGATCTATCACCAAGTA  
AGGCCAAGCAGTCTCTCACACCATGATGCCACAGGCTTCAATT

>4362 len=223 tot-seq=2

CTCCCGCAGGGCTGAAGTCTGGCGTAAGATGATGGATTTGATTGCCCCTCCTCCCTGTCA  
TAGAGCTGCAGGGTGGATTGTTACAGCTTCGCTGGAAACCTCTGGAGGTCATCTCGGCTG  
TTCCTGAGAAATAAAAAGCCTGTCATTTCAAACACTGCTGTGGACCCTACTGGGTTTTTA  
AAATATTGTCAGTTTTTCATCGTCGTCCCTAGCCTGCCAACAG

>4363 len=223 tot-seq=2

CTGGGGCAATGTCTCAGGGTGGGAGGTGGAGGCAGAGACAGAATGAGGCCCTGCTTTGTT  
GGGGCTGTGTGGGGTGGCCGAGTCTACTGGCCTGGGGTTTCTTGGATGTGCAAGATAGG  
AGGCTGCTTTTGACAAATTCCTTTGTGAGCAAAGTCATCACGAGTGTGTGGGCTCAGAGA  
CAGGCCCTCCATGCCAACACCACCTGCTTCCCTCGTCCCACA

>4364 len=224 tot-seq=2

CCAGCATGACTGACAACTAGTAACCAAACAACAGGAAACCTGGAAAGATTTCAATATGGC  
TGAATAGTTGTATCCAACCTCTCTCCCCTACATAGAAGTGCCGAAACAACAAATGTACAG  
CAGTATTTTGAAGTGAATGCTGTGGATGGGCCATGAATATCACCCAGTGGAAGATAGGAG  
TTTCCTAAGATCAGGAAACCAGGGTGCCAGCAGAGATGATCAGC

>4365 len=224 tot-seq=2

CTCCATCAGGTCAGGCCAGGCCATGCCGGAGGTGATCCCTAGGGCTTCCTTCCCCTCATG  
GCCCACATCCAGCCACCAGGAGGTCCCAGGGCTCCACCTTCAGGTTCTGGCCCACACCG  
GCCCACCCCTCACCTCCTCCAAGGAGTCTGTGGGGGTCCACACCACTGTCATCCCCTCCT  
CGTCCTCACTGGTGTCCCTGCTTCTCCTTAGGCCTACTTCAA

>4366 len=224 tot-seq=2

CACAGAAGGCGGTGGTGGGTGCCGGTGGGAGCCAAGGCCGATGAGCCTCTGCAGGATGACT  
CTTGAGAAATGGACCAAGTGCCAGTTCTTCCAAGTCACTTGTGGGTGTTCTTCTGTCCCA  
TAGTGACAGGGGCAGGCTCAGAGGCACATTCAGGAGCTATTTGTTCTCTGTTTTCCAC  
TGAGACACCTTCGCACAGCACCCGGTCCAGTCACCCCCCTCCAC

>4367 len=225 tot-seq=2

TTTACGTGGAAAGACAGGGTTGAGTGGGTTCACGGGGGTTCTGGAGCACCTGGTACCCG  
GGGTGCGAGGGAGTGAGTGTTTTGGGGCTCTAGGCTGAGAAATTTGACTTTTTCCAGTA  
GGCAATAGGGAGCCACAGAAGGTCTTTGAGCAGGGAGTGAGGATCAGATTTACAAGTAAG  
GAAAGTTCATCTGGGATGGAAAAGGAGGGGCCAGAAAGCTACAGA

>4368 len=225 tot-seq=2

TCCGATCTCTACGGGAGGCAGCAAGGCAGCGAGGAGAAGTGTGCCTCCCGGGGGGAAGT  
CTCAGGATTGTGGCCGCGGGTGAAGTGGATGGGAGAGGGGAGAATGACTTTCAGTGGCA  
AGGGAGAGAGGCTCCTGCTCTGAGACTCCCCTGAGAAGAGGCCGAAGGAGGCCCTGGGTG  
TGAGAATCTACAGGATGTAGAGCTGGGAATCAGCCAGGACCCCCT

>4369 len=225 tot-seq=2

GAAGATTGCGAAGTTGTTTGAAGTACGAGGCTTGCGGGGCTTGAAGCGCCGTTGTTAGCT  
CCAACAGCAGGCCTTTTCTTTACAGCATACTCAGTAATCAGCTTCTTACTCAAACGCAAG  
TAGCGCTTAGCATCCGCATCCGTACCGTCGTCAATAACAACTTGCCTTCGTCGTTTTTA  
ATGTAGTACTGATAATCCCCGGAATGGTATACAGATGGACGGTAT

>4370 len=226 tot-seq=2

GTCCTGGGGAGAGAGTGGACCCCGTTTTTGCATTAGCCCATATTGGGAAGCAATGGGGA  
TGGGCTAGAAAGCTGGTGCCTCAAGAGTGGTTATTGATGTCCTAATTACAAGAGGATGCT  
AATTTAATTTGAACCTAATTACAGTGCCTACCCTGGGTGGCATGTGTTTTAATAATTA  
CGTCCTTCAGATGCGTAGGAGTGAATAATATTTACTACTAGGTTGG

>4371 len=226 tot-seq=2

TCTGTTGCCAAGTGAGGACATTATTGAGATGAAAGCGGTGCTGAGGGGTCAGGGGGTCTC  
TACAGGTGTGCTGGGCAGGGCCTGAACCCCTGGCATGCACAGATGGTCCATGCTTACATC  
ACTCCTGGCTGCCCTGTGGGCTGGGTTGGACATTTCTGGGTCATGGGAACCAGATAAGCT  
CAGGTACAAGTGGGTGGGTGAGATGCTGTGTGAGCTCAGGGATTTC

>4372 len=227 tot-seq=2

CTAAAAGAATCCTGACGTGTTGGCTTGAATGGAAGGTATTGATGTGAATCCACAATAT  
AGTGATAGTTATAGAGATATAGAGGTACACATATATTTATAGATGGATACAGATACAGAT  
ATCCACACATATAGTAACAAACATACATGTGTATGTGTGGTTGTGTGTGACCCTGTATCA  
TTTATTTCTAACTGTGTCCACTGAAAGGGCCTAAAAGTCTGACACC

>4373 len=228 tot-seq=2

TGGGGAATATTGGGCAATGGGCGAAAGCCTGACCCAGCAACGCCGCGTGAGTGATGAAGG  
CCTTCGGGTTGTAAAACCTTTTGGACAGGGACGAAGAAAGTGACGGTACCTGTAGAACAA  
GCCACGGCTAACTACGTGCCAGCAGCGCGTAATAAGCAGATCGGAAGAGCGTCGTGTAG  
GGAAAGAGTGGCCAATGGGGAATATTGGGCAATGGGCGAAAGCCTGAC

>4374 len=229 tot-seq=2

GGCATAAGAGATTCGCTTGTGACTGGAGTTCAGACGTGTGATCTTAAGATATAATAAGGG  
AGGAAGAAGTAGGGAATATTAATAAATGGAAGAAAGTATGATGGAGAAAAGAAGAGTGAG  
TGAAGAAGGTATTAGGATCGTAAAACCTCTGTTGTTAGAGAAGAACACGAGTGAGAGTAAC  
TGTTCAATTCGATGACGGTATCTAACCAGCAAGTCACGGCTAACTACGTG

>4375 len=230 tot-seq=2

CGGGGGTCTGGGAGAAAGCATAAGGAAACCATCAGAGGTGTAGTCATATGCCTGCTTAAG  
ATGTAGAATGCTGCTGATGCAGTCTTTCCGGAACGTTATGAGCCTTAATAAATATCAAAT  
GAGCTTCGCTTGGCTTAATGATGCTGAGAGATGTGTGAATGTTTTGAGTAGACTGTATT

TACCAGTTCATAAAGAAGTATTTGCAGCATTACAAGGTGCCTATTGCAGG

>4376 len=230 tot-seq=2

TGTGCAGCAGCTGAAACTCCTCCTCCGTCCTGATGCCAGCCTCCAGGCAGCCACAGACAT  
CCTCTTCAGAGAAGTAGGTCTTGCGGGAGGACACCCCCTCATAGGCCAACGTGCCCATGG  
TTCGGGCTGCATAGGCCATCAGGGACAAATTGGAGGGGTCAGTGCTGTCCAGGGTTTCCC  
CGCTGAAGTTGAGGCGCAGGAAGCTGGTATAGATGCTTGTAAAGGGTCTGC

>4377 len=230 tot-seq=2

ACACCGGCCCTCTTTACTTTTGGACTATTGAAATGCTGTGAATAGCTGACCCCTCGATTTT  
AATTATGTCCGCAATCGGAATCGTCTGCCATTTACCATAACAAGCTCCTGCGCGACAGC  
ATCCAGTTTTTTCATCCGGACGGCGGCGATGATATATTCGCCGCCGTCCTTTTTCTTATC  
CGGCAGAAAATACGTGATCTCCGCCTCCGGACGCTCCTCGATAACCTCTG

>4378 len=231 tot-seq=2

GCACTGAGTGGATCTGTGGTGTAGTGACTTCTGAGCAACCAGGGGCTGGTTAGTGGGGA  
TTTCAGAGGAGGTGCAGCAAAGGAAACATTGCAGATGTGGCCACCTGTCCACTTTCAA  
GGCAAAGTGTACCACATCCACATGAGGAGCCATTGTGTCATTTTAATACAAGGTCACAG  
TTCACCCTGCTCTCTCACTTTGCTGATGTCCCTGATTACGCAGCAGCAGCA

>4379 len=231 tot-seq=2

CCGGCATAACGAGATTAACCTCGTACTGGAGTTCAGACGTGGGCTCGGCCGAGCGCCGACG  
GGAGGCAGCAGGAGGGAAGCGGCCACAAGGGACGAAAGCGGAGGGAGCAACGCCGCGGG  
AGGGAAGAAGGGGGCGGCGCGGAAAGCTCTGTTGGTAGTGAAGAAAGATAGAGGTAGTA  
ACTGGCCTTTATTTGACGTAATACTTAGAAAGTCACGGCTAACTACGTG

>4380 len=232 tot-seq=2

CAGAGGATGCAGGACACTGGTTCACCTGAGGATGCTGGCTTTCCTTTGTGTGTGCTTTTG  
CAGCAGTAGTGGTTGTTGCTCAGGGTGGGGGACAGTGTTGTTGATGTCTGTGTGCTTGT  
GGTGCCAGCAGTGATGGCCGCACAGAGTGGGCAAAATCGCTGGCATCTATCTGGGCAT  
GTGTTACACCAGTGGTGCAGTGGTGGTGGAGGGGGATGGAGTACGCTCATG

>4381 len=232 tot-seq=2

ACCAACTACTAACAACAAAAAGTAAATGACACTCTTTGTTCTGAGTATGTTAGAACTCAGAA  
CATCAAACCTCTATCTATATAGCTCTATCTATATCTAGAATTTTACTTAAGTAATAGGG

CTTCTATCACTAACTTTAGGAATTCTAGGCCTACATAAGATCTCTCCCCTCTACTTGGTT  
CAGTAAGAAGTATATTGGTACTCACCGTGTACTGCCAATCATAAGGTTGATA

>4382 len=235 tot-seq=2

TAGTACAGCATCCTCTGTAGAGTGTCAAGTGGCAGCAATAATCCAGATTCCTTTTTCTGT  
CCATCTTCTGAGCATGGTGTCAAGATTTAATTGATTTTAGTTGACTGTAACCAAGAAAC  
CAGCTAGAACTTTCTTAGTTTTATAAGTCTGCAGACCTGACCCTGAAACCCAGCAAGCA  
AGCCCAGCCTTCTGCCAGCAGCTGCGGTAATAAGAAGATCGGAAGAGCCGTAGT

>4383 len=235 tot-seq=2

ACAGTGATTATCAGATATGAAATTGCAGATAACTATGAGAACTATGGAATTTTGCATTTA  
GATAAAGTCCAGAGGTGACTGCCCAGGCCTTCGAGGTAAGTATTTTAGTGGAATCATTGT  
AGTCCAGTGCAGTGTTTATCAATTCACACATTATGGACATTTTGAGCAGGACAATTTTC  
TGTTGTGTAGGACTGATCTCAACTAGCACCCCTCGTCCTCAGGCATTAAATTCCA

>4384 len=235 tot-seq=2

GGAAGTGCTGGGTAGAGAAGAGTGGGGTCCCTGGTGAGGGCTCCACCCTCAGGCCTATGC  
CCATGGACCTAAGTGAGGACAGGCACTCCTGGTTTTGCACCCAAATGTTGCATTTTCTAA  
GCCCACTCTGACCCACCATGCCCCACATCCTGGGCCATAAAATCTTCAAGACCCTAGTG  
GGCATGGACACAAGTGGCTGGACGTGGAGAGGAGCAGAAAAGCACACTGACTGAT

>4385 len=236 tot-seq=2

TTCTCTACAGTGGCTTTCTCTGCTTCTGCAAACGATTCTCACTGCGAGGCTCTCAGAGT  
TTCCCCTGGGACTTTACACTTGAATAGACTTACCCATTAGTCATTTGCCTTCATATTCA  
GTCAGGATTTTTATTTAGTCTAATTAGTCTTCCTTTTTACACAACCTAGAACAACCTCA  
ATCCTTATGAGGATGTGGTTATAACCTTCACACCTCTGTAGAATTGGTAGCTTCTG

>4386 len=236 tot-seq=2

GAAGGCAGTTGCTGCTGGGGAAAGCAATTCTGTCTCCTTCGGCAATCTCAGCAGTGGCCA  
CTTGTCAGAAGAGCCGGCAGGGGAAAAAATGACAAAAAATCAGGTCCAATTTATCACC  
TTCAAATTGTGTTGAATAAGCTACTGTAGCTACTTGGTTTTGAAGAACTCTCCCTTCTTC  
CCCCTACACAGAACAACACCACTAAATGCCTCTCCACCTGCGCAGCTGAGCGTTG

>4387 len=238 tot-seq=2

GGGTCTCTGGGCAGGTGAGGACATCAGTGCCACCTTCTTCCCCTCTCTCAGGTCCG

GAGGTGACGCCAGGCCCTGGGGCCTACAGCCCAGAGAAGGTGCCCCCTGTGCGCCATCGG  
ACACCGCCGGCTTTCACCCTGGGCTGCCGCCTCCCCCTGAAGCCCCTGGACACCTCAGCC  
CCTGCCCCTAATGCCTACACCATGCCCCCTCTGTGGGGCTCACAGATCTTCACCAAGC

>4388 len=238 tot-seq=2

AGGTTGTAGAAATGCTCCTTGAGGCAGATGCCACACCCCAATTCATGGAGTGATTTGGG  
CTGAGCCGAGTCTGCAGCAGGCAGAAGGCTCTGAGATGTTGTCCTAGCCTGGGCAAAGGA  
CAATTCAGAGCTCGGGGGAATAGGGGTGTGCTCAGCACGACTGGGTGGACGGGCCCTTTG  
TAACAGAACACTTTGTGAGGGCCCTGCTGGAGGCCAGGGTGGCTGTTCTAACAAATA

>4389 len=100 tot-seq=1

TAGGGAATCTCCACAATGGACGAAAGTCTGATGGAGCAACACCGCGTGAGTGAAGAAGG  
GTTTCGGCTCGTAAAGCTCTATTGGCAGGGAAGAAAGTTA

>4390 len=100 tot-seq=1

GGGTGGGAGCTCAACGGAAAGAGCAGAGCTAGAGTCAGAAAGGCAGGGGTGTTGATTTGT  
CAATGGTCTTAACCGTGGCAGGCCAACAGAAGGAAAGGGG

>4391 len=100 tot-seq=1

GAGTGGTGATTA AAAAGCCAGAGAAAAGAGTCTGCTGTAACAGTGTGCTTCTTAGAAAT  
GTGAGAAGCAGCCGGGCAGTGGTGGCACACACCTTTAATC

>4392 len=100 tot-seq=1

GATCGCCATTGAGTGTAAGGTCAGGAGGAACTAAAGATCAAACTCTGTCTCAAAAATAA  
TAAGAATTGAGCTGGGCCGTGGTGACGCAGGCCTTTAATC

>4393 len=100 tot-seq=1

ATAGCAATGTACAGGCTGGCCAGTGCCTCGAATGCCACCCGTGACTGTGACAGACTCTGG  
CCTGCAGAGCTGAAAGATAAGAGGGCCGTGACAATCTATC

>4394 len=100 tot-seq=1

TACTGATGACAGAGCAAATGCATATTCCTTTGGAGGGTGGTGAGGTGACTAAAATGTAAG  
ATGCTGTTTGAGCTTGGACGCCATGCGGGCTCATGGAAGG

>4395 len=100 tot-seq=1

TACAGGCAGTTGTGAGCTTCCCTACGTGAGTGTGAAAAGTGAAGTGGGTCTATGGAA  
GAACAGGAAGCTCTCTTAACCACTTGTCATCTCTCCAGCC

>4396 len=100 tot-seq=1

CACCACCACCAACATACTACCACCAGCAGAAGCAGCAGCACCATCACCACCAGCAGCAGC  
AGTAGCATAACCACCAGCAGCAACGGCAGCACCATCACCA

>4397 len=100 tot-seq=1

CCGCGTGAACGAAGAAGTTATTCGTAATGTAAAGTTCTTTTATCAGGGAAGAAAGAGGAA  
TTTGACGGTAGCTTACCAGAAAGGGACGGCTAACTACGTG

>4398 len=100 tot-seq=1

CAGTGAATGGAAGCCCAACATCTAGATCAGTCCCACAAGGCAAGGAGGCGAAGAAGAGAG  
AGAGTGAATCTTCTTCTTTCAATGTCCTTATGTAGGTCT

>4399 len=100 tot-seq=1

TTATGTTCTCTCTGCATCGAATAGAAAATGATGCCCTGCCTCCATTGGGAAGAAGAAAG  
CAAAAAATATCAGTAATGAATTGTAAGATACAACTGCCT

>4400 len=100 tot-seq=1

TGGGGAATATTGCACAATGGGGGCAACCCTGATGCAGCGACGCCGCGTGAGTGAAGAAGT  
TATTCGTTATGTAAAGCTCTATTAGCAGGGAAGAAAATGA

>4401 len=100 tot-seq=1

TGTGAACATGATGATCAGGTACACTGTTCTTTCTCTCCATTAATGTTGTACCTCCATGTG  
CTTGTCTTAGGGTCAAATACAAAGAGGACTGTGGCTCCCA

>4402 len=100 tot-seq=1

GACTCAGGTTTTATCAGCCTTGCTATCACAGCCCTGTCAAATCACACAAAGCAATCAGTA  
ATGCTCGCCTTTCTCAGCCTGGAAGGAGGCAGTCACATCC

>4403 len=100 tot-seq=1

CAACCTGTTACTGTCCTTCATAGAGGTCTGGTCTCAGAGTCTTGCAGGAGGCAGAATCCA  
CAGTTCATCCAGGTTTCCATTTGGTTCTGCCTGGCTCTT

>4404 len=100 tot-seq=1

TAGGGAATCTTGACAATGGACGCAAGCCTGATGGAGCGACGCCGCGTGAGTGAAGAAGG  
GTTTCGGTTCGTAAAGCTCTATCAGTGGGGAAGAAAATGA

>4405 len=100 tot-seq=1

TAGGGGATATTGCACAATGGGCGCAAGCCTGATGGAGCGACGCCGCGTGAGTGAAGAAGG

ATTTCCGGCTCGTAAAGCTCTATCAGTAGGGAAGAAAATGA

>4406 len=100 tot-seq=1

CCAGCAGCCGCGTAATTAGCAGATTGGAAGAGCGTCGTGTAGGGAAAGAGTGTGCCAATG  
TG TAGATCTCGGTGGTCGCCGTATCATTAAAAAAAAAAAA

>4407 len=100 tot-seq=1

TAGGGAATCTTGACAATGGACGAAACTCTGATGGAGCCACGCCGCGTGTGTGAAGAAGG  
CCTTCGGATCGTAAAGCACTGTCGTTGGTGAGGAAGGAAA

>4408 len=100 tot-seq=1

TAGGGAATCTTCCACAATGGACGCAAGTCTGATGGAGCAACGCCGCGTGAGTGAAGAAGG  
GCTTCGGCTCGTAAAGCTCTTTTGTGGGGAAGAAAGGCA

>4409 len=100 tot-seq=1

TAGGGAATATTGCACAATGGAGGAAACTCTGATGCAGCGATGCCGCGTGTGTGAAGAAGG  
ATTTCCGGGTTGTAAAGCACTATCGGAGGGGAGGAAAAAAA

>4410 len=100 tot-seq=1

TAGGGAATATTGCACAATGGACGCAACTCTGATGCAGCCATGCCGCGTGTGTGAAGAAGG  
CCTTCGGGTTGTAAAGCACTTTCGGAGGGGAGGAAGGAAA

>4411 len=100 tot-seq=1

TAGGGAATCTTCCACAATGGACGCAAGTCTGATGGAGCAACGCCGCGTGTGTGAAGAAGG  
GTTTCGGCTCGTAAAGCACTGTTGGTGAGGAAGAAAA

>4412 len=100 tot-seq=1

TGGGGAATCTTCCACAATGGGCGAAAGCCTGATGCAGCAACGCCGCGTGAGGGAAGAAGG  
CTTTCGGGTCGTAAAGCTCTGTTGTTGGTGAGGAAGCATA

>4413 len=100 tot-seq=1

TGGGGAATATTGCACAATGGACGCAAGCCTGATGCAGCAACGCCGCGTGAACGAAGAAGG  
TCTTCGGATCGTAAAGCTCTGTTGCTGGGGAAGAAAATGA

>4414 len=100 tot-seq=1

TGGGGAATATTGCACAATGGGCGCAAGCCTGATGCAGCAACGCCGCGTGAACGAAGAAGG  
TCTTCGGATCGTAAAGCTCTGTTGCAGGGGAAGATAGAGA

>4415 len=100 tot-seq=1



TAGGGAATCTCCACAATGGACGCAAGTCTGATGGAGCAACGCCGCGTGAGTGAAGAAGG  
GTTTCGGCTTGTAAGCTCTGTTGTCGGGGACGAAGGAGA

>4416 len=100 tot-seq=1

TAGGGAATCTCCGCAATGGGCGCAAGCCTGATGCAGCAACGCCGCGTGAGCGAAGAAGG  
GCTTCGGCTCGTAAAGCTCTGTTGCTGGGGAAGAAAGTGA

>4417 len=100 tot-seq=1

TAGGGAATCTCCGCAATGGGCGCAAGCCTGATGGAGCAACGCCGCGTGAGTGAAGAAGG  
TTTTCGGATCGTAAAGCTCTGTTGTTGGAGAAGAAGGGGT

>4418 len=100 tot-seq=1

TAGGGAATCTTCGACAATGGACGCAACTCTGATGCAGCAACTCCGCGTGTGTGAAGAAGG  
TTTTCGGCCTGTAAACACTTTTAGTAGGGAAGAAAGACA

>4419 len=100 tot-seq=1

TGGGGAATATTGCACAATGGGCGAAACCCTGATGCAGCGACGCCGCGTGAGCGAAGAAGG  
GTTTCGGATCGTAAAGCTCTGTCCTTTGGGAAGAAAGTGA

>4420 len=100 tot-seq=1

TAGGGAATCTCCACAATGGGCGAAACCCTGATGGAGCGACGCCGCGTGAGTGAAGAAGG  
ATTCGGCTCGTAAAGCTCTGTTGGTGGTGAAGATAGTGA

>4421 len=100 tot-seq=1

TAGGGAATCTCCACAATGGACGCAACCCTGATGGAGCAACGCCGCGTGAGGGAAGAAGG  
GTTTCGGCTTGTAAGCCCTGTTGTTGGTGAAGAAGGTCA

>4422 len=100 tot-seq=1

TAGGGAATCTCCACAATGGACGCAACTCTGATGGAGCAACGCCGCGTGAGTGAAGAAGG  
GTTTCGGACTGTAAACTCTTTTGGTGGGGAAGAAGAAAA

>4423 len=100 tot-seq=1

TTTTTTTTTTTCAAGCAGAAGACGGCATAACGAGATGTGCTCTTCCGATCTCCTACGGGA  
GGCAGGAGCCGCGTAATGACCAGATCGGAAGAGCGTCGT

>4424 len=100 tot-seq=1

TAGGGAATCTCCACAATGGACGCAACTCTGATGGAGCAACGCCGCGTGAGTGAAGAAGG  
TTTTCGGACTGTAAAGCTCTGTTGGTGGTGAAGAAGGATA

>4425 len=100 tot-seq=1

TTTTTCAAGCAGAAGACGGCATAACGAGATGCCTAAGCTGGAGTTCAGACGTGTGCTCTT  
CCGATCTCTTACGGGAGGCAGCAGCCGCGTAATCCCGAG

>4426 len=100 tot-seq=1

TAGGGAATCTTCCACAATGGGCGCAACCCTGATGCAGCGACGCCGCGTGAGGGAAGAAGG  
TTTTCGGATTGTAAACCTCTGTTGTTGGGGAAGAAGGTTA

>4427 len=100 tot-seq=1

TAGGGAATATTGCACAATGGACGCAACTCTGATGCAGCAACGCCGCGTGAGTGAAGAAGG  
TTTTCGGACTGTAAAGCTCTGTTGTTGGGGAAGAAGGATA

>4428 len=100 tot-seq=1

TAGGGAATCTTCCACAATGGGCGAAACCCTGATGGAGCGACGCCGCGTGAGGGAAGAAGG  
ATTTCCGATCGTAAAGCTCTGTTGGTGGGGAAGAAAGTGA

>4429 len=100 tot-seq=1

TAGGGAATCTTCCACAATGGGCGCAAGGCTGATGGAGCAACGCCGCGTGAGTGAAGAAGG  
GGTTCGGCTCGTAAACTCTGTTGTTGGGGAAGAAAGACA

>4430 len=100 tot-seq=1

TGAGGAATTTTCCACAATGGACGCAAGTCTGATGGAGCAACACCACGTGAACGATGAAGG  
TTTTCTGATTGTAAAGCTCTTTATTTAGGAAAAAAGCG

>4431 len=100 tot-seq=1

TAGGGAATATTCCACAATGGACGCAAGCCTGATGGAGCAACGCCGCGTGAGCGAAGAAGG  
GCTTCGGATCGTAAAGCTCTGTTGCTGGGGAAGATGGTGA

>4432 len=100 tot-seq=1

TAGGGAATCTTCCACAATGGACGCAACTCTGATGGAGCAACGCCGCGTGAGTGAAGAAGG  
GTTTCGGCTCGTAAAGCCCTGTTGTTGGGGAAGATGGAGA

>4433 len=100 tot-seq=1

TAGGGAATCTTCCACAATGGACGCAAGCCTGATGGAGCAACGCCGCGTGAGTGAAGAAGG  
GTTTCGGCTCGTAAAGCTCTGTCCGCGGTGAAGAAGGACA

>4434 len=100 tot-seq=1

GAGCTCAGGAGTTCAAGGCCAGTCTGGGCAACATGGTAAAACCCTATCTCTACAAAAAA

TTTGAAAATTAGCCAGGCGTGGTGGTGCATTCTGTGGTC

>4435 len=100 tot-seq=1

GACGGCCCTATGGGATGTAACTGCTTTTAGAGGGGAATAAAGTGAGGGACGTGTCCCTT

ATTGCATGTACCATAAGAATAAGGACCGGCTAAGTCCGTG

>4436 len=100 tot-seq=1

TGGGGAATCTCCACAATGGACGCAACTCTGATCCAGCAACTCCGCGTGTGTGAAGAAGG

TTTTCGGATCGTAAAGCTCTTTTGGTGGGGAAGAAGAATA

>4437 len=100 tot-seq=1

TGGGGAATCTTCGACAATGGAGGCAACTCTGATGGAGCAATGCCGCGTGTGTGAAGAAGG

TTTTAGGACTGTAAAGCTCTTTTGGTGGGGAAGAAGGAAA

>4438 len=100 tot-seq=1

TAGGGAATCTCCACAATGGACGCAAGCCTGATGGAGCAACGCCGCGTGAGTGAAGAAGG

GTTTCGGCTCGTAAAGTTCTGTTGGTGGGGAAGATAGTGA

>4439 len=100 tot-seq=1

TGGGGAATATTGCGCAATGGGCGAAACCCTGACCCAGCGACGCCGCGTGCGGGATGAAGG

CTTTCGGGTTGTAAACCTCTTTTGATTGGGAGCAAGCTTT

>4440 len=100 tot-seq=1

TAGGGAATCTCCACAATGGGCGCAACCCTGATGGAGCGACGCCGCGTGAGTGATGAAGG

TCTTCGGATTGTAAACTCCTGTTGTTGGGGAGGATGGTTA

>4441 len=100 tot-seq=1

CTTATAGATTGTAAAGTTCTTTTATATGGGAAGAAGCACTAAGATAGGAAATGATTTTAG

TTTGACTGTACCAATTGAATAAGTAACGGCTAACTATGTG

>4442 len=100 tot-seq=1

TAGGGAATCTCCACACTGGACGCAACCCTGATGCAGCAACGCCGCGTGAGTGATGAAGG

CTTTCGGATTGTAAAGCTCTGTTGTTGGTGAAGAAGGTTA

>4443 len=100 tot-seq=1

GGTCTTATAGATCGTAAAACCTCTGTTGTAAAGGAAGAACAATTATTATAGGGAATGATAA

TAAGTTGACGGTACTTTACCAGAAAGCCCCGGCTAACTAC

>4444 len=100 tot-seq=1

TGGGGAATATTGCACAATGGGCGCAACCCTGATGCAGCAACGCCGCGTGAGTGAAGAAGG  
CCTTCGGGTCGTAAAGCTCTTTATTTGGAAGAAAATGA

>4445 len=100 tot-seq=1

TAGGGAATATTGCACAATGGAGGAAACCCTGATGCAGCGACGCCGCGTGAGCGAAGAAGG  
GTTTCGGGTCGTAAAGCTCTGTTCTTTGAGAAGATAATGA

>4446 len=100 tot-seq=1

TGGGGAATATTGGACAATGGACGCAACTCTGATGCAGCAACTCTGCGTGTGTGAAGAAGG  
TTTTAGGACCGTAAACTCTTTTAGTGGTGAAGAAAATA

>4447 len=100 tot-seq=1

CACAGAGGGTCAAAGCATGAACCCCCAGATCCTAGATGTGAGGCCCGCCTAGCTCCTTC  
TTAGCTGCATGAGGTCAGGCAAGCACTAACAGTTTGAGTT

>4448 len=100 tot-seq=1

TGGGGAATCTTCGACAATGGACGAAACTCTGATGCAGCAACTCCGCGTGAGTGAAGAAGG  
TTTTAGGACTGTAAACACTTTTAGTGGGGAAGAAGAAAA

>4449 len=100 tot-seq=1

TGGGGAATATTGACAATGGACGCAACTCTGATGCAGCAATGCTGCGTGTGTGAAGAAGG  
TTTTAGGCTCGTAAAGCACTTTTAGTGGGGAAGAAAAACA

>4450 len=100 tot-seq=1

TAGGGAATATTGCACAATGGACGCAACCCTGATGGAGCAACGCCGCGTGAGTGAAGAAGG  
GTTTCGGCTCGTAAACCTCTGTTGGTGGGGAAGAAAGACA

>4451 len=100 tot-seq=1

TAGGGAATCTCCACAATGGACGCAAGCCTGATGCAGCAACGCCGCGTGAGTGAAGAAGG  
TTTTCGGAATGTAAAGCTCTGTCAGTAGTGAAGAAGAAAA

>4452 len=100 tot-seq=1

CATGGGCCAGGGGAGGCACCCAGCCGGGCACACGAGCCACCACAATGCGGGACAAGGGAG  
CAGGTGGTGAGGCGGGCACGGGGGAAGTGCAGTCGGTGAA

>4453 len=100 tot-seq=1

TGAGGAATATTGGTCAATGGGCGCGAGCCTGAACCAGCCAAGTAGCGTGTAGGAAGACGG  
CCCTATGGGTTGTAAACCGCTTTTATGTGGGGGTAAAGTG

>4454 len=100 tot-seq=1

TCTTCGGATTGTAAAGCACTTTAAGTTGGGAGGAAGGACAGTAAGCGAATACCTTGCTGT  
TTTGACGTTACCGACAGAATAAGCACCGGCTAACTCTGTG

>4455 len=100 tot-seq=1

CAGCAGCCCGGACAAGACCAGCAGCCAGGATAAGAACAGCTGGCCCAGCAGCCCATACAA  
GACCAGCAGCCCAGACATAGCCCAGCAGCCCAGACATAGC

>4456 len=100 tot-seq=1

CCTCTGCCCCAGGCCCTTTTCCAGCTGTGTGCCCTCCTGACTGCCTAGGGAAGGTGACCA  
TGGCACGGGCAGCCTGCTCTGAGCCAGGCACCCACTGCGC

>4457 len=100 tot-seq=1

GAACAAGATTGAATTAAGATCACATTTTTCCGGAACGATGCCGTTCTCACGCAAGAAGTT  
GGCCAGAATGGTCGCCGGCACGCCGAACTCGGTGTA CTGG

>4458 len=100 tot-seq=1

AGGAAGAGAAGAGGAGGGCAGGCAGGGTGGGGGGCACGGGGGCCAGGCACTTACGTTGGT  
GAAGAAGAACAGGACCCCAGTGAAGAGCGTAATGACCTCG

>4459 len=100 tot-seq=1

GAGGAAAGGCAGGCCACGCGCAGCCACTGGACTGCTTGGCAAATGCTCAGGGCAGAGGG  
GGTCCCCAGGCCACTGCAGAAAGGCTCTGTGAGGGGCCA

>4460 len=100 tot-seq=1

GTTTCGGCTCGTAAAGCTCTTCTGGTAGTGAAGAAAGATACAGTTAGTAACTGGCCGTTA  
TTTGACGGTAATTACTTAGAAAGTCACGGCTAACTACGTG

>4461 len=100 tot-seq=1

AACAAAGACTATCATTTAGCCAGCAACTGTGGAGGTGGCTCTTGAGTAGGCAGTCTGACC  
CGGGGCCATGCCCTCATGGCCTCGCAGTTGCCTACTGGG

>4462 len=100 tot-seq=1

TAGGGAATATTCGACAATGGACGCAACTCTGATCCAGCAATCCGCGTGTGTGAAGAAGG  
TTTTCGGACCGTAAACTCTTTTAGTGGGGAAGAAAGAAA

>4463 len=100 tot-seq=1

GTGACAATAAATACTGATACGAGGCTCTTTTGGGCCTTGTAATTGGAATGAGTACAATTT

AAATCTCTTAACGAGGAACAATTGGAGGGCAAGTCTGGTG

>4464 len=100 tot-seq=1

TCTTCGGATTGTAAAGTTCTGTTATTAGTGAAGAACATTTGCAATAGGAAATGATTGCAG

ACTGACGGTACCTTGTCAAAAAGCGATGGCTAACTATGTG

>4465 len=100 tot-seq=1

TGGGGAATATTGCACAATGGAGGGAACTCTGATGCAGCGACGCCCGTGAGTGAAGAAGT

ATTTCCGGCTCGTAAAGCTCTGTTGGTAGTGAAGAAAGATA

>4466 len=100 tot-seq=1

GTTTCGGTTCGTAAAGCTCTGTTGTTGGAGAAGAACGGGCGTGAGAGTAACGGTTCACGC

AGTGACGGTATCCATCCAGAAAGTCACGGCCAACACTACGTG

>4467 len=100 tot-seq=1

AGCGACGCCGAGTGAGCGAAGAAGTATTTCCGGTATGTAAAGCTCGATAAGAAGGGAAGAA

AATGACGGTACCTTACGAAGAAGCTCCGGCTAAATACGTG

>4468 len=100 tot-seq=1

CTACGTGCCAGCAGCCGCGTAATACGTAGGGCGCGAGCGTTGTCCGGATTTATTGGGCG

TAAAGAGCTCGTAGGTGGTTAGTCGCGTCTGTCGTGAAAG

>4469 len=100 tot-seq=1

GTCAGGGGCTTCCCAGAGCCCTCCCTTCTAGGCAGGGCAGGAGGTGACTCTCCAAGGT

GCCCCAGGAGAAGCAGAAACCAGAGGAAGAGGCCAGACAT

>4470 len=100 tot-seq=1

GGAAGAAGCTGGAGCCGCTCCCCACCACAACCACAGCAGCCTGGATACAGGAACCCGA

ATGTCACTCAGTTCAGACTGAACTGGCTCTGCTGCCACC

>4471 len=100 tot-seq=1

TTTCGGATCGTAAAGCTCTGTTTTAAGAGAAGAACGTGTGTGAGAGTGGAAAGTTCCTC

AGTGACGGTAACTAGCCAGAAAGGGACGGCTAACTACGTG

>4472 len=100 tot-seq=1

TTGTCAGGTCCCAGATATGAGACAAAAAAGACTCAGGGAAAGTTCCTAGATTTCTGATT

GAGTACGTAAATGGTATTATCATTTACTGAGCTGTAGAAT

>4473 len=101 tot-seq=1

CAACGCCGCGTGAATGATGAAGGTCTTCGGATGGTAAAGTCTTTACTAAGGGGAGAAGA  
TAGTGACGGTACCTTAGGAATAAGCCTCGGCTAACTACGTG

>4474 len=101 tot-seq=1

TTTTCGGATCGTCCAGCTCTGTTGTAAGTCAAGAACGAGTGTGAGAGTGGAACTTCACA  
CTGTGCCTTTGGCTTACCTGCCTTTGACGGCTAACTACGTG

>4475 len=101 tot-seq=1

CAGCCATGCCGCGTGTCTGAAGAAGGTCTTCGGATTGTAACTCCTGTTGTTGAGGAAGA  
TAATGACGGTACTCAACAAGGAAGTGACGGCTAACTACGTG

>4476 len=101 tot-seq=1

TGGCGAGAACGAGGGCACTGCTGGGTCTGCTGGGCCCTGCAAGGGCCCCCAGTAAGTC  
CTCTGCCAGTGCCAAGACCACCGAACAGAAGCTCAATAGCC

>4477 len=101 tot-seq=1

TGGGGAATATTGCACAATGGGCGCAACCCTGACGCAGCCACGCCGCGTGCATGAAGAAGG  
TCTTCGGATTGTAACTGCTTTCGCCAGGGAGGAAGACAGT

>4478 len=101 tot-seq=1

TGGGGAATATTGCACAATGGGGGCAAGCCTGATGCAGCCATGCCGCGTGAGTGAAGAAGG  
ATTCGGGATGTAAAGCTCTTTCAGCAGGGAGGAAAATGAC

>4479 len=101 tot-seq=1

TAGGGAATATTCGGCAATGGGGGCAACCCTGATCGAGCAACGCCGCGTGTGTGAAGAAGG  
TCTTCGGATTGTAAAGCTCTGTCGTAAGTCAAGAACGAGTG

>4480 len=101 tot-seq=1

TGGGGAATTTCCGCAATGGGCGCAAGCCTGACGGAGCAATACCGCGTGAGGGATGACGG  
CCTTCGGGTCGTAAACCTCTTTTATTAAGGAGGAAGGTCTG

>4481 len=101 tot-seq=1

TAGTGACAATAAATAACAATACCGGGCTCCTCGAGTCTGGTAATTGGAATGAGCACAAATC  
TAAATCCCTTAGCGAGGATCCATTGGAGGGCAAGTCTGGTG

>4482 len=101 tot-seq=1

TAGGGAATCTTCGGCAATGGGGGCAACCCTGACCGAGCAACGCCGCGTGAGTGAAGAAGG  
GTTTCGGCTCGTAAACTCTGTTGTTGAAGAAGAACGTGCG

>4483 len=101 tot-seq=1

CACTCCAAGAGAGTGAAGCTGCTTGTATACAGCTTGGTTAAAACTACATAGGAAAACA  
AAACCTCCTGAGGGTGGTAACCCTTGTTCCTCGTTGGCTC

>4484 len=101 tot-seq=1

TACTTTTTGGTGTGATAGTCCTCAAAGCCAGCCAGCAACCCGCGTAATTAGCAGATCGGA  
AGAGCGTCGTGTAGGGAAAGAGGGTGCCAATGTGTAGATCT

>4485 len=101 tot-seq=1

TAGGGAATCTTCCACAATGGGCGCAACCCTGATGCAGCAACCCGCGTGAGTGAAGAAGG  
GTTTCGGCTCGTAAAGCTCTGTTGGTTGGGAAGAAAGTGTC

>4486 len=101 tot-seq=1

TAGGGAATCTTCGGCAATGGACGCAAGTCTGACCGAGCAACGCCGCGTGAGTGAAGAAGG  
TTTTCGGATCGTAAAGCTCTGTTGGCAGAGAAGAAGGAGTG

>4487 len=101 tot-seq=1

TAGGGAATCTTCCACAATGGACGCAAGTCTGATGGAGCAACGCCGCGTGAGTGAAGAAGG  
GTTTCGGATCGTAAAGTCTGTTGTTGGGGAGGAAGGACAG

>4488 len=101 tot-seq=1

TGGGGAATCTTGCGAATGGACGAAACCCTGACGCAGCGACGCCGCGTGAGGGATGAAGG  
CCTTCGGGTTGTAAAGCGCTGTTGATCGGGACGAATGGTCC

>4489 len=101 tot-seq=1

TAGGGAATCTTCCACAATGGGCGAAACCCTGATGCAGCAACGCCGCGTGAGCGAAGAAGG  
TTTTCGGATCGTAAAGCTCTGTTGATGGGGAAGAAGGATTG

>4490 len=101 tot-seq=1

TGGGGAATATTGGACAATGGAGGGAAGCTCTGATCCAGCAACTCCGCGTGTGTGATGAAGG  
TTTTAGGACTGTAAACCGCTTTTAGTTGGGAAGAAAAAAT

>4491 len=101 tot-seq=1

TGGAGGCCTTCGGGTTGTAAACCTCTTCGCCAGTGAAGCAGGCCTGCTCCTTGTGGGTG  
GGTTGACGGTAGCTGGATAAGAAGCGCCGGCTAACTACGTG

>4492 len=101 tot-seq=1

TAGGGAATCTTCCACAATGGACGCAAGCCTGATGCAGCAACGCCGCGTGAGTGAAGAAGG



CTTTCGGCTCGTAAAGTTCTTTTGGTGGTGAGGAAGGAATG

>4493 len=101 tot-seq=1

TTTTTTTCAAGCAGAAGACGGCATAACGAGATAGGTTTCGTGACTGGAGTTCAGACGTGTGC

TCTTCCAATCTCCTACGAGAGGCAGCAGATCGGAAGAGCGT

>4494 len=101 tot-seq=1

CGGTAATCAACCAGAAAGTCACGGCTAACTACGTGCCAGCAGCCC GCGGTAATGCTCAGA

TCGGAAGAGCGTTCGTGTAGGAAAGAGTGTGCCAATGTGTAG

>4495 len=101 tot-seq=1

CCCAGCAGCCCAGCGCCGCGTAATTTTTAGATCGGAAGACGTTCGTGTAGGGAAAGAGTG

TGCCAATGTGTAGATCTCGGTGGTCGCCGATCATTAAAAA

>4496 len=101 tot-seq=1

TAGGGAATATTCCACAATGGACGAAACCCTGATGGAGCAACGCCGCGTGAGTGAAGAAGG

TTTTCGGTTTCGTAAAGTTCTGTCGTTGGTGAAGAAGGATAG

>4497 len=101 tot-seq=1

TAGGGAATCTTCCACAATGGACGCAAGTCTGACGGAGCAACGCCGCGTGAGTGAAGAAGG

TTTTCGGATCGTAAAGCTCTGTTGATGGGGAAGAAGGAGAG

>4498 len=101 tot-seq=1

TAGGGAATCTTCCGCAATGGGCGCAAGCCTGATGGAGCAACGCCGCGTGAGTGAAGAAGG

TTTTCGGTTTCGTAAACTCTGTTGTTAGAGAAGAACATCAC

>4499 len=101 tot-seq=1

TGCCTGGAGAATCCCAGGGATGGCAGAGCCTGGTGGGCTGCCGTCTGTGAGGTTGCTCAG

AGTCGGACACGACTGAAGCGACTTAGCAGCAGCAGCAGCCG

>4500 len=101 tot-seq=1

GATAATAAACAAAGACAAGCAGGATCAGGACCAGCAACAACAGCAAAACCAGCAACAACAG

CCTGATCAACAGAATCCTCAGGATAAAAACGAAGATAAAGA

>4501 len=101 tot-seq=1

GGGACTGGCATGTCAGCATTGCACTGAGTGTGTGTATACCTGGCCAGGCCTTGACAGTGC

CTGGGCTTGGCCCCAACTTTGCTCCAAGATCAAAGTGGGTG

>4502 len=101 tot-seq=1

CAAGAGACAGTTGTCTTGGAGAGAGAAAATGGATTGTTTTCCAAGTTCTTACCCTGCTTG  
GTGCCACTTATTTGCCAGGAACTACATTCCGCCAGCTCCCA

>4503 len=101 tot-seq=1

TAGGGAATCTTCGGCAATGGGGGCAACCCTGATCCAGCCATGCCGCGTGAGTGATGAAGG  
CCTTCGGGTTGTAAAGCTCTTTTGGCGGGGACGATGATGAC

>4504 len=101 tot-seq=1

GTCCAGATGAAAGATTTTTATAAGTGGTCCTGGCAAGAGATGATGGGGACTTGGGTAAAG  
ATGGTAGAACCAAGAGGACTTGCTGAGGAACTGGATTTTGG

>4505 len=101 tot-seq=1

GCTCACAGGCCAACCCGAGTTCTGGGTGGGGCAGGCTCGGCAGGCCCCACACTCAGAGT  
GGGCCGCCTGGCCCTGGGCAGTGAGGGGCACAGCACCTTGG

>4506 len=101 tot-seq=1

CATGTGCAGGAAAGCAGGCATTCCCAGAAACCCAGAAAGAAGTGGCAGCCAAGAAACAG  
GCCCCAGGAGCACGACGGGGACACAGCCTCCTCAACCATTC

>4507 len=101 tot-seq=1

CTTGGTAGAACTGGAAGTTGGAGAACAGTGAGGTAGACACAACCAGAGTCTGGAACAGGG  
GCCCTTCTTTCCAGACGAGTTTCCCCTCGCTTTTCTGGA

>4508 len=101 tot-seq=1

GGTTTCGGCTCGTAAAGCTCTGTTGTTAGTGCAGAAGGACAGGGGTAGTAACTGACCTTT  
GTTTGACGGTAATCAATTAGACTCACGGCTAACTACGTG

>4509 len=101 tot-seq=1

GTAGGTTTTCTAGTCAAAGCATCAGCATTGGTTTGGCGGACAGCCAGCATTACCACCA  
GACAAGGGAGTGGTGATTCCATGCTCAACCCTTTGTGTCTT

>4510 len=101 tot-seq=1

CATTCGCGCTCTTAAGAGGCTTGGTAGCTGGGCATGTATCTGGAACAGTAACCTGAGCCA  
TTGCTGGAGCAGCAAAGCGAAACCGGAGAGGAGGGTGGCG

>4511 len=101 tot-seq=1

TAGGGAATCTTCCACAATGGACGCAAGCCTGATACAGCAACGCCGCGTGAGTGAAGAAGG  
TTTTCGGATTGTAAAGCTCTGTTGTTGGTGAAGAAGGCTAG

>4512 len=101 tot-seq=1

GGGACGAAAAATAACAAGACAGGACGCGGGCGAGGCCCGGGAAGGGGAAGGAGTCCACTG  
TAAATCCTTTAACGAGGATCCATTGGAGGGCAAGTCTGGTG

>4513 len=101 tot-seq=1

TGGGGAATCTTGACAATGGGCGCAACCCTGATACAGCCACGCCGCGTGCATGAAGAAGG  
CCTTCGGGTTCGTAAAGTACTTTTCAGCGGGGAGGAAGGGAGT

>4514 len=101 tot-seq=1

CAAGGGAGGCTGTGGCAGGGTAGGCTTTCTTCAAGGTGCATGAAGATGTGGGGCCCTGTA  
ATCAGGGGACAGGGTCACTATCAGTGGCTCATACTTGCC

>4515 len=101 tot-seq=1

CGGATGCCGGCCACCTCCCCACCCACTGCCTCCACTCAAGGTTGGGGCAGTGGGGGAC  
AGGACGTGGGGCAGCGGACTCAGTGTCTGGGAGGAGCAGTTG

>4516 len=101 tot-seq=1

TCCAAACAAACCTACAATCGAAGTAAAGCAGCGCGCTTTCAATAGCGAGGCAAGGTCCCT  
TGCTCCAACCAGAAACGGGATGATACCTGGTGAACCCCAT

>4517 len=101 tot-seq=1

GGTGGCCGAGAAAAACAGGGTGGATCGGCCCTGGTCCAGGCATTCGCGCAGGTTACCCGA  
TGGGTTTATGCACATCAGCTTGACCAGAAAGCTGCCGTCT

>4518 len=101 tot-seq=1

AAGACGGCATAACGAGATAACCGAGTGACTGGAGTTCAGACGTGTTCTCTCCGATCTCCT  
TCGGGAGGCAGCAGCCGGGTAATAAATAGATCGGAAGAGCG

>4519 len=102 tot-seq=1

CTTAGCCTTAGATGACCCTAGGGATGGGCTATGTAAGCCCATCTCTAATCTCCAAGCCTG  
GATTCTCAGGTACCCAGAATATTTGGAAGGGAGTCCACCCAT

>4520 len=102 tot-seq=1

AAGTGGAACCTTGACAGAGGTGACTTAGCCAGAAACAGGTAGAGCTGGGGCTCTGAACAGAA  
AGATTATGATCTACTGTCAGGGATGGTGGCCATACCATGATC

>4521 len=102 tot-seq=1

CTTGCTCCACCAAGCCACCGGCTAACAGGATGAAGTTCCCAAGCAAGGCGTGCATCTTG

TTGGGACAGCAGTCAGAGCCCTGGCCCGGTCTCCCTTCACAG

>4522 len=102 tot-seq=1

GTTTTCGGATCGTAAAGCTCTGTTTGAAGAGAAGAACGAGTGTGAGAGTGAAAAGTTCAC

ACTGTGACGGTAACTTACCAGAAAGGGACGGCTAACTACGTG

>4523 len=102 tot-seq=1

ATGACTGCCCTATGGGTTGTAAACTTCTTTTATGCGGGAATAAAGTGGCCACGTGTGAA

TTTTTGTATGTACCATATGAATAAGGATCGGCTAACTCCGTG

>4524 len=102 tot-seq=1

TAGGGAATCTTCGGCAATGGACGGAAGTCTGACCGAGCAACGCCGCGTGAGTGAAGAAGG

TTTTCGGATTGTAAACTTCTGTTATAAAGGAAGAACGGCGGC

>4525 len=102 tot-seq=1

AACAGCCCCAGATTGGGAGCATGCAAGTGAGCTTTAGCCACGCGAAAGGGTCTGGCCTCA

CCTTGTCTTGACCTTCCGGGCCATCCAGCACTTGGACACAC

>4526 len=102 tot-seq=1

TAGGGAATCTTCGGCAATGGACGGAAGTCTGATCGAGCAACGCCGCGTGAGCGAAGAAGG

ATTTTCGGATCGTAAAGCTCTGTTGTTAGAGAAGAAAGTTGGT

>4527 len=102 tot-seq=1

TAGGGAATCTTCCACAATGGACGCAAGCCTGATGGAGCAACGCCGCGTGAGGGAAGAAGG

GTTTCGGCTCGTAAACCTCTGTTGTTGGGGAAGAAAGAAAGG

>4528 len=102 tot-seq=1

TTTTTCAAGCAGAAGACGGCATAACGAGATGATCTGGTGACTGGAGTTCAGACGTGTGCC

TTTTTGTATGTACCGTATGAATAAGGATCGGCTAACTCCGTG

>4529 len=102 tot-seq=1

TAGGGAATCTTCCACAATGGACGAAAGTCTGATGGAGCCACGCCGCGTGGGTGAAGAAGG

CCTTCGGGTCGTAAAGCACTTTTGGTGGTGAGGAAAGAAAGG

>4530 len=102 tot-seq=1

TAGGGAATATTGCACAATGGAGGAAACTCTGATGCAGCCACGCCGCGTGTGTGAAGAAGG

CTTTCGGGTCGTAAAGCTCTTTCGGTGGGGAGGAAAAAATG

>4531 len=102 tot-seq=1

TGGGGAATCTTGACAATGGGCGCAAGCCTGATGCAGCAACGCCGCGTGAATGAAGAAGG

TTTTCGGATCGTAAAGCTCTGTTGCTGGGGAAGATAGTGACG

>4532 len=102 tot-seq=1

TGGGGAATATTGCACAATGGGCGAAAGCCTGATCCAGCAATGCCGCGTGAGTGATGAAGG

CCTTAGGGTTGTAAAGTTCTTTCACCGATGAAGATAATGACG

>4533 len=102 tot-seq=1

TAGGGAATCTTCCACAATGGACGCAAGCCTGATGGAGCAACGCCGCGTGAGTGAAGAAGG

TTTTCGGCTCGTAAACTCTGTTGTTGGAGAAGAACGACTGG

>4534 len=102 tot-seq=1

CGCGTGGAGGATGGAGGCCTTCGGGTTGTAAACATCTTTTGTAGGGAGCAAGGCATTT

GGGTTGAGTGTACCTTTCGAATAAGCACCGGCTAACTACGTG

>4535 len=102 tot-seq=1

TGGGGAATATTGGGCAATGGGCGAAAGCCTGATCCAGCCATGCCGCGTGTGGGAAGAAGG

CCTTCGGGTTGTAAAGCGCTTTTAGTTGGGAGGAAGGGCATT

>4536 len=102 tot-seq=1

TGAGGAATATTGGTCAATGGGCGAGAGCCTGAACCAGGAATAAAGTGAGGGACGTGTCCC

TTATTGCATGTACCATATGAATAAGGACCGGCTAATCCGTG

>4537 len=102 tot-seq=1

GTTGCTGGAGCCAGGCTTTGAATGATGAGGAAGCCCTTTGCTAGATGGTGAGCAGGGAGG

AAGGCATTCTGGGCCCTTGCTATTTAGTGTGTGGTTTCTGGA

>4538 len=102 tot-seq=1

TTTTTTTTTTCAAGCAGAAGACGGCATAACGAGATTACGTTGTGACTGGAGTTCAGACGTG

TGCGAGGCAGCAGCCGCGTAATACTTAGATCGGAAGAGCGT

>4539 len=102 tot-seq=1

TGGGGAATATTGGACAATGGAGGCAAGTCTGATCCAGCAATGCTGCGTGTGTGAAGAAGG

TTTTCGGACTGTAAACACTTTTAGTAGGGAAGAAAAAATG

>4540 len=102 tot-seq=1

AGCCCAGCCTCAGGATCTGCAATCTCAGACAGAATCGCTTTTTCGGCTGGCAAGGTAGGG

CTAGGCAGCAGGCACAGGTGCCATTTACAGATTACCTCGGG

>4541 len=102 tot-seq=1

TAGGGAATCTTGGGCAATGGACGGAAGCCTGACCCAGCAACGCCGCGTGAGTGAAGAAGG  
CTTTCGGATTGTAAAGCTCTGTTGGTAGGGAAGAACGTTGTT

>4542 len=102 tot-seq=1

CAACAGGCACAAGCTCTGTACAAGTGTGCTGCAGGAACAATCCAGTGAGGAATGCCAGTC  
CTGACAGTGAGGGACAAGCCATGGGGGTCTCTGTCCCCTTCT

>4543 len=102 tot-seq=1

GGCTGGAGGGCTCTTACTCATGAGAACACAGAGAAGGAGCAGGTGGAAAGGCGAGAAGAA  
AACCCAGGGAGCTGAGAAGAGGAAGTGGTATTTTCAACAAAC

>4544 len=102 tot-seq=1

GGTTTTCGGATCTTACAGCTCTGTTGTTGGTGAAGGAGGATAGAGGTAGTAACTGGCCTT  
TATTTGACGGTAATCAACCAGGAATTCACGGCTAACTACGTG

>4545 len=102 tot-seq=1

TTCACCTCTTGTCTGTGGTACCTCTTAGGAGCTGCACCTCCCATCAGTGCTTCAAGA  
GGTATCTGACTTGATATTTTCTGTGGGTCTGGACATTCACC

>4546 len=102 tot-seq=1

ACCGGAGGGTGTGGGGCTGGCCAGGCTCCCCTGGGCACCAGGCGTGTGACCCCCGCTTCT  
CCCAGCTCCTCTCATCCCCAGCTGGGCTCATCCCAAGTC

>4547 len=102 tot-seq=1

GACAGAAGAGGAACAGAAGCAAACACACAGAGAAGAAGGTGATGTAAGGACAGAGGCAGG  
GATTGGAGAGCTGTGCTATAGGCCAAGGAGAGCAAAGGAGTG

>4548 len=102 tot-seq=1

TAGGGAATCTTCCACAACGGACGAAAGTCTGATGGAGCAACGCCGCGTGAGTGAAGACGG  
TTTTCGGATCGTAAAGCTCTGTTGTTGGTGACGAAGGATAGA

>4549 len=102 tot-seq=1

CATTTACTTTCCTCTAAGTTGCCTACATCACCCCTCCCCTCTCCCCTGGGAAGAAGGTAC  
ATACAAGCTCCAACCCCTTCCCTTCTGGGAATCCCCAAGTTA

>4550 len=102 tot-seq=1

CATACGAGATCCGTAGGTGACTGGAGTTCAGACGTGGGCTCTCCGATCTCCTACGGGAA

GCAGCAGTAGGACCTTTCGAATAAGCGCCGGCTAACTACGTG

>4551 len=102 tot-seq=1

TGGGGAATCTTCGACAATGGGCGCAAGCCTGATCCAGCAATACCGCGTGGGTGAAGAAGG

CTTTCGGGTTGTAAAGCCCTTTTGTGGGAAAGAAAGGCAGT

>4552 len=103 tot-seq=1

GGAATTTACCAGAGCTCCTACTTAGTTGCTTTTTTTCACCTTGATCCCAAATCAGCAGC

CTGCATTTAGCAAAGGGCATGGGGCCAGCCCCATCTCAGGTC

>4553 len=103 tot-seq=1

CGGGCCTATATGTGTGCACAGTTCCTACGGGCCAGCCTTCATGGGAACAGGCACCCTGG

ATCCCTGATGGGCTCTTGATGGTAACCGAATAAGAGCGATGAG

>4554 len=103 tot-seq=1

CAGGTGAAGGCAGAACGCTTTGTTGCTACTGTTGTTATTTGGGGGCAGAATCTCACTGTT

GCTCAGCTGTCCCCACCTCCTAGGCTTAAGCACTGGTGTGGA

>4555 len=103 tot-seq=1

AGAGGACACCAGACATCCCCAACAGTGGCAGCTCCCAGGCAGAGAGCCCGGCTGTGAGTG

CCATGTTGCATGCCATCGCTGCCAGCCACCTGCCTGTGTGCAG

>4556 len=103 tot-seq=1

TAGGGAATCTCCACAATGGACGCAAGTCTGATGGAGCAACGCCGCGTGAGTGAAGAAGG

GTTTCGGCTCGTAAAGCTCTGTTATATGGGACGAACAGGACAT

>4557 len=103 tot-seq=1

TGGGGAATCTCCACAATGGACGAAAGCCTGACGGAGCAACGCCGCGTGAGTGAAGAAGG

TCTTCGGATTGTAAAGCTCTGTTGTACGGGAAGAAAGAGACGG

>4558 len=103 tot-seq=1

TGGGGAATATTGCACAATGGGCGGAAGCCTGATGCAGCGATGCCGCGTGTGGGATGAAGG

CCTTCGGGTTGTAAACCACTTTCAGCAGGGAAGAAGCCACAAG

>4559 len=103 tot-seq=1

TAGGGAATCTCCACAATGGGCGCAACCCTGATGGAGCAACACCGCGTGAGTGAAGAAGG

GTTTCAGCTTGTAAAGCTCTGTTGTTGGAGAACAAGGTGTGTG

>4560 len=103 tot-seq=1

TAGGGAATCTTCCACAATGGACGCAACTCTGATGGAGCAACGCCGCGTGAGTGAAGAAGG  
TTTTCGGATCGTAAAGCCCTGTTGTCGGTGAAGAAGGATAGGG

>4561 len=103 tot-seq=1

TGGGGAATATTGCACAATGGGGGAAACCCTGACCCAGCAACGCCGCGTGCATGATGAAGG  
CCTTAGGGTTATAAAGTTCTTTCACCTGTGAAGAAAATGACGG

>4562 len=103 tot-seq=1

TGGGGAATCTTGCACAATGGGCGCAAGCCTGATGGAGCAACGCCGCGTGAGCGATGAAGG  
TTTTCGGATCGTAAAGCTCTGTTGTTGGGGAAGATGATGACGG

>4563 len=103 tot-seq=1

TGGGGAATATTGCGCAATGGGGGAAACCCTGACGCAGCGACGCCGCGTGCGGGATGAAGG  
CTTTCGGGTTGTAAACCTCTTTTGTGGGGAGCAAGGTTTCGG

>4564 len=103 tot-seq=1

TTTCATGGAGCCCAGAAATAAGTTCTGCGGCATATGCAAATGTAAGCAATGGGGGCAGCA  
GAACGGGCCTCTAGGTTCAAAAATGGCAGTTGTCTCCAAGAGG

>4565 len=103 tot-seq=1

TAGGGAATCTTCCGCAATGGACGCAAGCCTGACGGAGCAACGCCGCGTGAGTGAAGAAGG  
TTTTCGGATCGTAAACTCTGTTGTCAGAGAAGAACATATCGT

>4566 len=103 tot-seq=1

TAGGGAATCTTCCGCAATGGACGCAAGTCTGACGGAGCAACGCCGCGTGAGTGATGACGG  
TCTTCGGATTGTAAAGCTCTGTTAATCGGGAAGAACGGTCGGT

>4567 len=103 tot-seq=1

TACGGGAGGCAGCAGTAGGGAATATTGCACAATGGGCGCAAGCCTGATGCAGCCATGCCG  
CGTGTATGAAGAAGGGCTTCGGGTTGTAAAGTACTGTCGGCAG

>4568 len=103 tot-seq=1

TAGGGAATCTTCCGCAATGGACGGAAGTCTGACGGAGCAACGCCGCGTGAGTGCAGAAGG  
TTTTCGGCTCGTAAAGCTCTGTTGTTGGTGAAGAACGACAGGG

>4569 len=103 tot-seq=1

TAGGGAATCTTGCACAATGGACGAAACCCTGATGCAGCAACGCCGCGTGCGGGAAGAAGG  
TCTTCGGATTGTAAAGCTCTGTTGTTGGTGAAGAAGGATAGTG



>4570 len=103 tot-seq=1

TAGGGAATCTTCGGCAATGGGCGCAACCCTGACCGAGCAACGCCGCGTGAGTGAAGAAGG  
TTTTCGGATCGTAAAGCTCTGTTGTTAGAGAAGAACGTGAGGG

>4571 len=103 tot-seq=1

TAGGGAATCTTCCACAATGGGGGCAAGCCTGATGGAGCGACGCCGCGTGAGCGAAGAAGG  
GTTTCGGCTCGTAAAGCTCTGTTCTATGAGAAGAAAGTGACGG

>4572 len=103 tot-seq=1

TGGGGAATATTCCACAATGGACGAAAGTCTGATGCAGCAACGCCGCGTGAGGGAAGAAGG  
TCTTCGGATTGTAAAGCTCTGTTGTTGGGGAAGAAGGATAGAG

>4573 len=103 tot-seq=1

TCAAGCAGAAGACGGCATAACGAGATGCCTAAGCAGACGTGTGCTCTTCCGATCTCTTACG  
GGAGGCAGCAGTCAAGCCCAACAACCAGCACCCACCCCAACCT

>4574 len=103 tot-seq=1

TAGGGAATCTTCCACAATGGACGCAAGTCTGATGGAGCAACGCCGCGTGAGGGAAGAAGG  
GTTTCGGCTCGTAAAGCTCTGTTGGCAGGGAAGAAAGAGAGGG

>4575 len=103 tot-seq=1

TAGGGAATCTTCCACAATGGACGCAAGCCTGATGGAGCAACGCCGCGTGAGTGAAGAAGG  
GCTTCGGCTCGTAAACCCTGTTGTTGGGGAAGAAGGGCAGGG

>4576 len=103 tot-seq=1

TAGGGAATCTTCCACAATGGATGCAAGTCTGATGGAGCAACGCCGCGTGAGTGAAGAAGG  
GCTTCGGCTCGTAAAGCACTGTTGGTGGGGAAGAAGGACAGGG

>4577 len=103 tot-seq=1

TAGGGAATCTTCCACAATGGGCGCAAGCCTGATGGAGCAACGCCGCGTGAGCGAAGAAGG  
TTTTCGGATCGTAAAGCTCTGTCGTTGGAGAAGATGGTGAGAG

>4578 len=103 tot-seq=1

TAGGGAATATTCCACAATGGACGAAACCCTGATGCAGCAACGCCGCGTGAGTGAAGAAGG  
TTTTCGGATTGTAAAGCTCTGTTGTTGGTGAAGATGGTTAGAG

>4579 len=103 tot-seq=1

AAGGTTTCGGATCGTAAAGCTCTGTTGTTGGAGAAGAAGGAGAGAGATAGTAACTGGCCA

TTATTTGACGGTAATCAACCAGAAAGTCACGGCTAACTACGTG

>4580 len=103 tot-seq=1

TAGGGAATCTTCCACAATGGACGCAAGCCTGATGGAGCAACGCCGCGTGAGCGAAGAAGG

TTTTCGGATCGTAAAGCTCTGTTGTTGGTGAAGAAGGTTACGG

>4581 len=103 tot-seq=1

TAGGGAATATTCCACAATGGGCGCAACCCTGATGGAGCGACGCCGCGTGAGTGAAGAAGG

TTTTCGGATCGTAAAGTTCTGTTGTTGGGGAAGAAGGATAGAG

>4582 len=103 tot-seq=1

TGGGGAATCTTGACAATGGGCGCAAGCCTGATGCAGCAACGCCGCGTGAGTGAAGAAGG

CTTTCGGCTCGTAAAGCTCTGTTGTTGGTGAAGAAGGTTAGGG

>4583 len=103 tot-seq=1

CGCAGCAACGCCGCGTGAAGGAAGAAGGTCTTCGGATCGTAACTTTTGTCTTCAGGAAC

GAAAATGACGGTACCTGAGGAGGAAGCCACGGCTAACTACGTG

>4584 len=103 tot-seq=1

TAGGGAATCTTCCACAATGGACGCAAGTCTGATGGAGCAACGCCGCGTGAGTGAAGAAGG

GTTTCGGCTCGTAAAGCTCTATTGGTGGGGAAGAAAGTCAGGG

>4585 len=103 tot-seq=1

CATGAGCGGCAGACAGGCGGCCAAGAAGTGAGGCCCCAGACAGGGATCTGAGCGTGATCT

TTGCCCTTGGGACGCAAGGCATCCATCCAAGAGGTCACAGAAA

>4586 len=103 tot-seq=1

TAGGGAATCTTCCACAATGGACGCAAGCCTGATGGAGCAACGCCGCGTGAGTGAAGAAGG

GTTTCGGCTCGTAAAGTCCTGTTGTTGGTGAAGAAAGACACGG

>4587 len=103 tot-seq=1

TAGGGAATCTTCGGCAATGGGGGCAACCCTGATCGAGCAACGCCGCGTGAGTGGAGAAGG

TTTTCGGATCGTAAAGCTCTGTTGTTAGAGAAGAACGAGTGTG

>4588 len=103 tot-seq=1

TGGGGAATATTGCGCAATGGGCGAGACCCTGAAGCAGCGACGCCGCGTGCGGGATGAAGG

CCTTCGGGTTGTAAACCGCCTTTGATTGGGAGCAAGCCTTCGG

>4589 len=103 tot-seq=1

TGGGAATCTTGCACAATGGGGGAAACCCTGACGCAGCGACGCCGCGTGCGGGATGAAGG  
CTTTCGGGTTGTAAACCTCTTTTGTGGGAGGAAGCCTTCGG

>4590 len=103 tot-seq=1

TAGGGAATCTTCCACAATGGACGCAAGTCTGATGGAGCAACGCCGCGTGAGTGATGAAGG  
AATTCGTTTCGTAAACTCTGTTCTTTGTGAAGAAGGGCACTG

>4591 len=103 tot-seq=1

TAGGGAATCTTCCACAATGGGCGCAAGCCTGATGGAGCAACGCCGCGTGAGTGAAGAAGG  
GCTTCGGCTCGTAAAGCTCTGTCTTGGGGAAGAAAGTGACGG

>4592 len=103 tot-seq=1

TAGGGAATCTTGACAATGGACGCAACCCTGATGCAGCAACGCCGCGTGAGGGAAGAAGG  
CTTTCGGGTTGTAAACCTCTGTTGTTGGTGAGGAAGGATACGG

>4593 len=103 tot-seq=1

CGGCATACGAGATGTAAAGTTCTTTCGGTAATGAGGAAGGGATGTTGTTAAATAGATAGC  
ATCATTGACGTTAATTACAGAAGAAGCACCGGCTAACTCCGTG

>4594 len=103 tot-seq=1

GATGACGGTCCTATGGGTTGTAAACTGCTTTTATAGGGGAATAAAGTGAGGGACGGGTCC  
CTTATTGCATGTACCATAAGAATAAGGACCGGCTAATTCGTG

>4595 len=103 tot-seq=1

ACAGATGTGAAAAATGGGACTGTGGCTTGGTTTAGATGTAATGAGTGAAGGAAATCAAAT  
CTAGAATGATGAGTTCTGACATGAAAAATGGTGGGTGATGGTG

>4596 len=103 tot-seq=1

TAGGGAATCTTCCACAATGGACGAAAGTCTGATGGAGCAACGCCGCGTGAGCGAAGAAGG  
TTTTCGGATCGTAAGGCTCTGTTGTTGGTGAAGATGGTTACAG

>4597 len=103 tot-seq=1

GATGACGGCCCTATGAGTTGTAAACTGCTTTTATAGGGGGATAAAGTGGGGAACGTGTTCC  
CCTTTTGCGGGTACCATATGAATAAGGCCCGGCTAATTCGTG

>4598 len=103 tot-seq=1

TAGGGAATCTTCCACAATGGACGCAAGTCTGATGGAGCAACGCCGCGTGAGTGAAGAAGG  
GTTTCGGCTCGTAAAGCCCTGTTGGTGGTGAAGAAAATAGGG

>4599 len=103 tot-seq=1

TAGGGAATCTTCGGCAATGGCCGGAAGCCTGACCGAGCAACGCCGCGTGAGTGAAGAAGG  
ATTTCCGGATCGTAAAGCTCTGTTGTCAGAGAAGAACGAGAGTG

>4600 len=103 tot-seq=1

TAGGGAATCTTCCACAATGGACGGAAGTCTGATCGAGCAACGCCGCGTGAGTGAAGAAGG  
TTTTCCGGATCGTAAAGCTCTGTTGTTAGTGAAGAAGGAGAGAG

>4601 len=103 tot-seq=1

TGGGGAATATTCCACAATGGGCGCAACCCTGATGCAGCGACGCCGCGTGAGCGAAGAAGG  
GTTTCGACTCGTAAAGCTCTGTCCTTTGAGAAGATAATCACGG

>4602 len=103 tot-seq=1

TGGGGAATCTTCCACAATGGGCGCAACTCTGATGCAGCGACGCCGCGTGAGCGATGAAGG  
TTTTCGACTCGTAAAGCTCTGTCCTATGGGAAGATAGTGACGG

>4603 len=103 tot-seq=1

TGGGGAATCTTCCACAATGGACGCAACCCTGATGCAGCGACGCCGCGTGCGTGATGAAGG  
CCTTCGGCTCGTAAACCGCTTTTGTGGGAGCAAGCTCTCGG

>4604 len=103 tot-seq=1

TGGGGAATATTGCACAATGGGCGCAAGCCTGATGCAGCAACGCCGCGTGAACGATGAAGG  
GCTTCGGATCGTAAAGTTCTGTTGCTGGGGAAGAAAGTCACGG

>4605 len=103 tot-seq=1

TAGGGAATCTTCCACAATGGACGCAAGTCTGATGGAGCAACGCCGCGTGAGTGAAGACGG  
GCTTCGGCTCGTAAAGCTCTGTTGTTGGTGACGAAGGACCGGG

>4606 len=103 tot-seq=1

TAGGGAATCTTCCACAATGGACGCAACCCTGATGCAGCAACGCCGCGTGAGTGAAGAAGG  
GTTTCGGCTCGTAAAGCTCTGTTGTTGGGGAAGATGGTCACGG

>4607 len=103 tot-seq=1

GATTTGGGGGCTGAGATGGAAGGTTGGGGCTTAGAGGGTCTGAAAGGACTTTGACTGGA  
GGGATTGGAAGGAGTGGGAGGAAAGAACATGGTGTGTGGGGGG

>4608 len=103 tot-seq=1

CAAAGGGAAAAGACAAGAGATCTATTTGGGGAGCCAAGCAGTTCCTGCAAAGTTGCGCC

ACTGAAGCTCTGCATCCTAGCAACCTGCATTCTGCCCACTTTT

>4609 len=103 tot-seq=1

ACGGGAGGTTCCCGGTGGAGGGGCTTAAGGAGAGGGTCTGTACGTTTATCCCGTTACCT  
GTCTGAGAGGGGTGACGTGGTGGCTATGGCATGGGTTTCAGTA

>4610 len=103 tot-seq=1

TAGGGAATCTCCGCAATGGGCGAAAGCCTGATGGAGCAACGCCGCGTGAGTGAAGAAGG  
TCTTCGGATCGTAAACTCTGTTATTAGGGAAGAAGGTTTGTG

>4611 len=103 tot-seq=1

CAGCACCTTCTAGGACAGGTGGCAATCCAGCAGCAACAGCAGCAGGGTCTGGAGTACAG  
ACAAACCAAGCTCTGGGTCCCAAGCCCCAGGGCCTTATGCCTC

>4612 len=103 tot-seq=1

GGCCTTCGGGTTGTAAAGCTCTGTTAATCGGGACGAATGGCTACCATGCGAATAGTTTGG  
GAGTTTGACGGTACCGGAATAGAAAGCCACGGCTAACTACGTG

>4613 len=103 tot-seq=1

GGTGGATGGGGAAAAGCAGGGCTGTGCCCTAGGCTGACCTATGAACTCTGCTCCCACTCC  
AAACAGCTGTGTCACCAGCAGGTCACCTACACTCAGCCTAGCT

>4614 len=103 tot-seq=1

TAGGGAATTTCCACAATGGACGCAAGTCTGATGGAGCAATGCCGCGTGAGTGATGAAGG  
TTTTCGGATCGTAAAGTTCTGTTGTTGGGGAAGAAGGATAGAG

>4615 len=103 tot-seq=1

TAGGGAATCTCCACAATGGACGCAACTCTGATGGAGCGACGCCGCGTGAGTGAAGAAGG  
TTTTCGGATCGTAAAGCTCTGTTGGTGGGGAAGAAGGAGAGAG

>4616 len=103 tot-seq=1

CAATTCGAGTCTTTACGTCACTTTTGAACATATAAACCAGAAGTTACCAGAGCCTCCT  
CCTTTAACCAAAAACCTATTTGCTCAGCTGGCTGAAAACATTG

>4617 len=103 tot-seq=1

TGGGGAATATTGGACAATGGGCGCAAGCCTGATCCAGCCATGCCGCGTGTGTGAAGAAGG  
CCTTCGGATTGTAAACTACTTTTGTCTGGGAGGAAGGGCAGTA

>4618 len=103 tot-seq=1

GAAAGGGAAGGTTCCCTAGCCCAAGAGCTGAAGATTACCACAGAAGGACAAATCAGTCGG

GAAAAACATATCCTGCTCCCATCCATCAGTGATCCTGGAGAGT

>4619 len=103 tot-seq=1

GAAGTGTGTGCTGAGCCAGGGCAGGGAGGAGGAATGTGAGCTATGAACGCCGCCGAGCT

CCTCGGCTCTCTGGGCCCCCTTCCCCACGAGCCCATGTGCTG

>4620 len=103 tot-seq=1

TAGGGAATCTTCCACAATGGACGCAAGTCTGATGGAGCAACGCCGCGTGAGCGAAGAAGG

TCTTCGGATCGTAAAGCTCTGTTGTTGGTGAAGATGAATACAG

>4621 len=103 tot-seq=1

TAGGGAATCTTTCGTAAAGCTCTGTTGTTGGTGAAGAAGGATAGAGGTAGTAACTGGCCT

TTATTTGACGGTAATCAACCAGAAAGTCACGGCTAACTACGTG

>4622 len=103 tot-seq=1

TGTCTTTGTGTTCCCTCTCATGTTTGTAGGGCATTGTTGATTGTTTATATCCTATGTA

TGGTGCAGTGGCGGAAGAGTGGCCTCTCAAAGATATGTCCGC

>4623 len=103 tot-seq=1

CGGACTGAGGTGGTGAGGACTGGGGACGGGGGTCTCAGGTGAGAGCGGAGAAGTCTCTC

CATCCTGGGATGCAGGGGTGACACACTTGAGTGATGAGGGGTC

>4624 len=103 tot-seq=1

GGGGGCGGGGCCAGACATCAGTATTTTTTTCAGAACTCCCTATATGATTCATGGGCAGCG

GAGCTTACAAACCCACTCTGGAGCACAGCGTTATCTGGTCTTT

>4625 len=103 tot-seq=1

TGGGGAATATTGCACAATAGGCGAAAGCCTGATGGAGCGACGCCGCGTGAGCGAAGAAGG

ATTCGGAATGTAAAGCTCTATCAGAAGGGAAGAAAATGACGG

>4626 len=103 tot-seq=1

CTGCTGTTATCCCGCCGCTCACTCAGGGGCAGTGTGTCATCTGCTCACTATCCCTGAGCT

CATTTGCCTGGCCCTCTGTGATGTGGAGAGGGAGGGGCCGCC

>4627 len=103 tot-seq=1

CTTGGGGCACACATCCTCAGGCTTATAGGTGCCGGTGGGAGAGACAGAAGCATCCGCAGC

AAGGATTTTAATTCATCTCTGGTGCCTATATCACTAAGCAATG

>4628 len=103 tot-seq=1

TAGTGACGAAAAATAACAATACAGTACGCTTTCGAGGCCCTGTAATTGTAATGAGTCCAC  
TTTAAAGCCTTTAACGAGGAACCATTGGAGGGCAAGTCTGGTG

>4629 len=103 tot-seq=1

CGTATTGAATTTACTTGAAGGTGCAAGCTGACAGCACCTGGTGTCTCTATCGATGGA  
AGTGGGCCGCGGAGAGGGTCCACGCGCACGTTTGACTGGTCA

>4630 len=103 tot-seq=1

CAGGGAATCTTGGGCAATGGGGGCAACCCTGATCGAGCAACGCCGCGTGAGTGAAGAAGG  
TTTTCGGATTGTAAAGCTCTGTTGTAAGAGAAGAAAGTGTGGG

>4631 len=103 tot-seq=1

TAGGGAATCTTCGGCAATGGGCGCAAGCCTGACCGAGCAACGCCGCGTGAGTGAAGAAGG  
ATTCGGAACGTAAAGCTCTGTTGTAAGAGAAGAACATGTGTG

>4632 len=104 tot-seq=1

GGAAGAGGACCTATTTGAGAGCTGCGGCCACCCGGAAGAGGAAGAGGAAGAGGAGGAAGA  
AGATCAGGAAGAGGAGCAGGAGGAGGAGGGAGATTTAGCTTTGG

>4633 len=104 tot-seq=1

CTGTGAATGGAAGTCCAAGATCTAGCAGTTGCTCAGACTCACCAAACAAGCAGGCATAGA  
AGAGAGAGTCCATCTTCCTTCTTTCAATGTCCTTATGTAGGTCT

>4634 len=104 tot-seq=1

TAGGGAATAGTCCACAATGGAGGAAAGTCTGATGGAGAAACGCCGCGTGAGCGAAGAAGG  
GTTTCGGCTCGTAAAGCTCTGTTGGTAGTGAAGAAAGGTAGAGG

>4635 len=104 tot-seq=1

TAGGGAATCTTGGACAATGGGGGCAACCCTGATCCAGCCATGCCGCGTGTCTGAAGAAGG  
CCCTCGGGCTGTAAAGGACTTTTGTCCGGGAAGAAATGCGCGAT

>4636 len=104 tot-seq=1

TAGGGAATCTTGACAATGGACGCAAGTCTGATGGAGCAACGCCGCGTGAGTGGAGAAGG  
GTTTCGGCTCGTAAAGCGCTGTTGTTGGGGAAGAAAGACACGGG

>4637 len=104 tot-seq=1

TGGGGAATCTCCGCAATGGACGCAAGCCTGACGGAGCAATGCCGCGTGAGTGATGACGG

CCTTCGGATTGTAAAGCTCTGTCAATCGGGACGAATGGTCGGTG

>4638 len=104 tot-seq=1

TGGGGAATTTTGGACAATGGGGGAAACACTGATCCAGCCATCCC GCGTGTGCGATGAAGG

ACTTCGGGTTGTAAAGCACTTTTGGCAGGAAAGAAAAGTAGTGG

>4639 len=104 tot-seq=1

TGGGGAATCTTGCACAATGGGCGAAACCTGACGCAGCGACGCCGCGTGC GGGAGGAAGG

CCTTCGGGTTGTAAACCGCTTTTGATTAGGAGCAAGCCCTCGGG

>4640 len=104 tot-seq=1

TAGGGAATCTCCACAATGGGCGCAAGTCTGATGGAGCGACGCCGCGTGC GGGGAAGAAGG

GCTTCGGGTCGTAAACCGCTTTTGTGGAGGAAGGTCTGGGG

>4641 len=104 tot-seq=1

TGGGGAATCTTGCGCAATGGGCGAAACTCTGACGCAGCGACGCCGCGTGAG GGGATGAAGG

CCTTCGGGTTGTAAAGCTCTTTTGATTGGGAGCAAGGCTTTTGG

>4642 len=104 tot-seq=1

TGGGGAATATTGCGCAATGGGGGAAACTCTGATGTAGCGACGCCGCGTGC GGGATGAAGG

CCTTCGGGTTGTAAACCGCTTTTGTGGAGCAAGCCCTGTGG

>4643 len=104 tot-seq=1

GGAGGCTACTTCCGGGAGAGGGCAGCAGCACAGGAGAAGGCCCTGCCGCCTACAG GGGT

CCTACTCCACTCCGGGACCCTGCCCATCTGTGGCCATCCTCCCA

>4644 len=104 tot-seq=1

TAGGGAATCTTCGGCAATGGACGGAAGCCTGACCGAGCAACGCCGCGTGAGTGAAGAAGG

TTTTCGGATTGTAAAGTTCTGTTGTAAGTGAAGAACGAGTGTGT

>4645 len=104 tot-seq=1

TGGGGAATATTGCGCAATGGGCGAAACCTGACGCAGCGACGCCGCGTGC GGGATGAAGG

CCTTCGGGTTGTAAACCGCTTTTGATGGGGAGGAAGGTTTCGGG

>4646 len=104 tot-seq=1

TGGGGAATATTGACAATGGACGCAACTCTGATCCAGCAATTCCGCGTGTGTGAAGAAGG

TTTTAGGACTGTAAAGCACTTTTAGTGGGGAAGAAAGAATGAGG

>4647 len=104 tot-seq=1



TAGGGAATCTCCACAATGGACGCAAGCCTGACGGAGCAACGCCGCGTGAGTGAAGAAGG  
GCTTCGGCTCGTAAACTCTGTTGTTGGGGAGGAAGGCCCGGGG

>4648 len=104 tot-seq=1

TGGGGAATATTGCACAATGGGCGAAACCCTGACGCAGCGACGCCGCGTGCGGGATGACGG  
CCTTCGGGTTGTAAACCGCTTTTGATGGGGAGCAAGCCTTTTGG

>4649 len=104 tot-seq=1

TAGGGAATCTCCACAATGGACGAAAGTCTGATGGAGCAACGCCGCGTGAGTGAAGAAGG  
TTTTCGGATTGTAAAGCTCTGTTGTTGGGGAAGAAGAATAGGGG

>4650 len=104 tot-seq=1

TAGGGAATCTCCACAATGGGCGCAACCCTGATGGAGCAACGCCGCGTGAGTGAAGAAGG  
GCTTCGGCTCGTAAAGCTCTGTTGTTGGTGAAGAAGGTCTGGGG

>4651 len=104 tot-seq=1

CGGCATACGAGATAAGGCCGTGACTGGAGTTCAGACGTTGCTCTTCCGATCTCCTATGGG  
AGGCAGCAGATCTTCATGCCTACAGTCGGCCGCCTCAGCTATGA

>4652 len=104 tot-seq=1

TGGGGAATATTGCACAATGGGCGAAACCCTGATGCAGCGACGCCGCGTGCGGGATGAAGG  
CCTTCGGGTTGTAAACCGCTTTCAGCAGGGACGACGCCGCCAGG

>4653 len=104 tot-seq=1

TAGGGAATCTCCACAATGGGCGCAAGCCTGATGGAGCAACACCGCGTGAGTGAAGAAGG  
GTTTCGGCTCGTAAAGTTCTGTTGTTGGGGAAGAACATGAGGGT

>4654 len=104 tot-seq=1

TGGGGAATATTGCACAATGGGGGCAACCCTGACGCAGCGACGCCGCGTGCGGGAAGAAGG  
CCTTCGGGTTGTAAACCGCTTTTGATTGGGAGGAAGCCTTTTGG

>4655 len=104 tot-seq=1

TGAGGAATATTCCACAATGGGCGCAAGCCTGATGCAGCAACGCCGCGTGAGTGATGAAGG  
TTTTCGGATCGTAAAGCTCTGTTGTTGGGGAAGAAGGATAGAGG

>4656 len=104 tot-seq=1

TAGGGAATCTCCACAATGGACGAAACCCTGATGGAGCGACGCCGCGTGAGTGATGAAGG  
CTTTCGGATCGTAAAGCTCTGTTGTTGGTGAAGAAGCATAGGGG

>4657 len=104 tot-seq=1

TAGGGAATCTTGACAATGGGCGCAAGCCTGATGGAGCAACGCCGCGTGAGTGAAGAAGG  
TTTTCGGATCGTAAAGCTCTGTTGTTGGTGAAGAAGGCTGGAGG

>4658 len=104 tot-seq=1

TGGGGAATATTCCGCAATGGGGGAAACCCTGACGCAGCGACGCCGCGTGCGGGATGAAGG  
CCTTCGGGTCGTAAACCGCTTTTGTGAGCAAGGCTTTTGG

>4659 len=104 tot-seq=1

TAGGGAATCTTCCACAATGGACGCAAGCCTGACGGAGCAACGCCGCGTAAGTGAAGAAGG  
CTTTCGGATCGTAAAGCTCTGTTGTTGGTGAAGAAGGATAGTGG

>4660 len=104 tot-seq=1

TAGGGAATCTTCCACAATGGACGCAAGCCTGATGGAGCAACGCCGCGTGAGGGAAGAAGG  
GTTTCGGCTCGTAAAGCTCTTTTGTGGGGAGCAAGGAAAGGGG

>4661 len=104 tot-seq=1

TGGGGAATCTTCGACAATGGAGGCAACTCTGATGCAGCAACGCCGCGTGAGTGAAGAAGG  
GTTTCGGCCTGTAAACACTTTTAGTGGGGAAGAAAGAATGGGG

>4662 len=104 tot-seq=1

TGGGGAATATTCCACAATGGACGCAAGCCTGATGCAGCAACGCCGCGTGAGGGAAGAAGG  
TCTTCGGATCGTAAACCTCTGTTGTTGGTGAAGAAGGTTACGGG

>4663 len=104 tot-seq=1

TAGGGAATCTTCCACAATGGACGCAAGCCTGATGGAGCAACGCCGCGTGAGTGAAGAAGG  
GCTTCGGATCGTAAACCCCTGTTGTTGGGGAAGAAAGTGAGGGG

>4664 len=104 tot-seq=1

TGGGGAATCTTGCGCAATGGGGGAAACTCTGACGCAGCGACGCCGCGTGCGGGATGAAGG  
CCTTCGGGTTGTAAACCGCTTTTGGTTGGGAGCAAGCCCTCGGG

>4665 len=104 tot-seq=1

TAGGGAATATTGCACAATGGACGAAACCCTGATGGAGCAACGCCGCGTGAGGGAAGAAGG  
ATTCGGATTGTAAAGCTCTGTTGGTGGTGAAGAAGGATTGAGG

>4666 len=104 tot-seq=1

AGGAAGACGGATCTATGGTTTGTAAACTTCTTAGTGCGGGAACAAAGGGGTGTCGTGAC

ACCGGATGAGTGTACCGCAAGAATAAGCATCGGCTAACTCCGTG

>4667 len=104 tot-seq=1

CACTAGGTGCCCAAAGATTTCCCTCTCCATCATAACTGCTCCCTCCCTGAGGCACTTTTT

CTGCAGAGTGCCTCCAGCAAGACACCTCACTATGGCTTGTTCT

>4668 len=104 tot-seq=1

TAGGGAATCTTCCACAATGGACGCAAGTCTGATGGAGCAACGCCGCGTGAGCGAAGAAGG

TTTTCGGATCGTAAAGCTCTGTTGGTAGTGAAGAAAGTTAGAGG

>4669 len=104 tot-seq=1

TAGGGAATCTTCCACAATGGGCGCAAGTCTGATGCAGCAACGCCGCGTGAGTGAAGAAGG

TTTTCGGATCGTAAAGCTCTGTTGTTGGTGAGGAAGGATAGTGG

>4670 len=104 tot-seq=1

TAGGGAATCTTCCACAATGGACGCAAGTCTGATGGAGCAACGCCGCGTGAGTGGAGAAGG

GCTTCGGCTCGTAAAGCTCTGTTGGTAGGGAGGAAAGATAGAGG

>4671 len=104 tot-seq=1

TAGGGAATATTCCACAATGGGGGAAAGCCTGACGGAGCAACGCCGCGTGAGGGAAGAAGG

TTTTCGGATTGTAAAGCTCTGTTGTTGGGGAGGAAGGATAGGGG

>4672 len=104 tot-seq=1

TAGGGAATCTTCCACAATGGACGCAAGTCTGATGGAGCAACGCCGCGTGAGGGAAGAAGG

TTTTCGGATCGTAAAGTTCTGTTGTTGGTGAAGATGGTTAGAGG

>4673 len=104 tot-seq=1

ACCGCCGCCGCCGCCTAGTTACCATCACACCCCGGGAGGAGCCGCAGCTGCCGCAGCCG

GCCCCAGTCACCATCACCGCAACTATGAGCAGCGAGGCCGAGAC

>4674 len=104 tot-seq=1

TGGGGAATATTCCACAATGGGCGAAAGCCTGATGGAGCGACGCCGCGTGAGCGAAGAAGG

ATTCGGTATGTAAAGCTCTATCAGAAGGGAAGAAAGTGATGGT

>4675 len=104 tot-seq=1

GTGAAGAAGGTCTTCGGATTGTAACTGCTTTTGTATGGGGATAAAGTTAGGGACGTGTC

CCTATTTGCAGGTACCATACGAATAAGGACCGGCTAATTCCGTG

>4676 len=104 tot-seq=1

TGGAGGGACTTGGAGAAGGCAGAGCTATCATTAGTGCCTGCCCAAGCCGGACCCAATCT  
GCTCACCAAAGCAGGAGGCCACGCTTGCCCATGTGTCCTAGTAC

>4677 len=104 tot-seq=1

TCCAAAAGAAAATAAAGGGAAAGATTCTATGGCATGCCTTGCCAAAGTGAGCATGCTCT  
GGGAGTCAGGAATGCTCCGGCATTAGGAGCGAGCAGGGGAGAG

>4678 len=104 tot-seq=1

GGAATGAGTGGGAGCCTCTGAGGTCCTGGGGCCATGGGGAACGGGGTATCTCTGTCA  
CCGCAGGATTCTTCCAGCCCCGGTTCAAAGCCATCCACTTCAT

>4679 len=104 tot-seq=1

TAGGGAATCTCCGCAATGGGCGAAAGCCTGACGGAGCAACGCCGCGTGAGTGATGAAGG  
TCTTCGGATTGTAAAGCTCTGTTAGTAGGGAAGAACATAAGTGT

>4680 len=104 tot-seq=1

GGATGAAGGTCTTATGGATTGTAACTGCTTTTGTAAAGGAAGAATAAGGGCTACGCGTA  
GTTTGATGACGGTACCTTACGAATAAGCATCGGCTAACTCCGTG

>4681 len=104 tot-seq=1

CCAACCTGGGCCCATGATTGACAATGGCCTGGAGTTCATCCAGAGAGTGGGGACCTGGCC  
TGATATTGCTGGGGCCCCTCTGACTCTGCCCACTGGGCCTC

>4682 len=104 tot-seq=1

GCGGAAGTGGCGGCGCATGCGCACTGGCACCTCTCGGTGTCCTTTGAGCTGCGGCCGCA  
GAGTGCGCGGGAGACCTACCCATTCCGCGGCCGGACCACCACTC

>4683 len=104 tot-seq=1

TGGGGAATATTGCGCAATGGGGGAAACCCTGACGCAGCGCTTTTGATTGGGAGCAAGCCT  
TTTGGGTGAGGTACCTTTGAATAAGCGCCGGCTAACTACGTG

>4684 len=104 tot-seq=1

TAGGGAATCTCCACAATGGACGCAAGTCTGATGGAGCAACGCCGCGTGAGTGAAGAAGG  
GTTTCGGCTCGTAAAGCTATTAGAAAGTCACGGCTAACTACGTG

>4685 len=104 tot-seq=1

CATCCTGTCCAGCGCCAGCTTCATCAGCTTGGGCAGCAGTGCCCTCACCTACCAGGTGAG  
CAGCGGGCTGCTGACTTCCACAGCCAGCCTTCCCTCCACCCAGG

>4686 len=104 tot-seq=1

CAATAAAAAAGCAGGCAAATGCTCTGAGCAGACAACATGAAGAAACACAAATGATCAACA  
CATACACGGAAGCAAGCTCTCCCTCATTAGAAACCCCGGTAGTC

>4687 len=104 tot-seq=1

TTTTTCTAAAAAAATTATTTTTTCAGAGAGGGCGGTTCTTGCTATGTTGCCAAGGCTGTT  
CCTGAACTCCTGGTCTCAAGCTATTACAGGCATGTGACCCATGA

>4688 len=104 tot-seq=1

CCAAGATTCCCAGCGCCCAGGGCTTTCACCTGTCCCACCCTCTGCAGCTAAGGAAACCC  
CCTTTCTGGACCCTTGGCGTCCCAGGTCCCTGTGCCTTGCTCAG

>4689 len=104 tot-seq=1

AGGTTTTCGGATCGTAAAGCTCTGTTGTATGAGAAGAACGTGTGTGAGATTGAAAGTTC  
TCACTGTGACGGTAACTTACCAGAAAGGGACGGCTAACTACGTG

>4690 len=104 tot-seq=1

AATCACCTAAACTCATTAGAGAATGGTCAAGCCCACAGCAATGATGAGGAAGGCACGCTT  
GCGTTTTCTGGGCTGTAGTTTCTGGATGCAGTCATGTCCAAGGC

>4691 len=104 tot-seq=1

AAGGTTTTCGGATCGTAAAGCTCTGTTGTTGGTGAAGAAGAATAGAGGGAGTAACTGGTC  
TTTATTTGACGGTAACTCAACCAGAAAGGCACGGCTAACTACGTG

>4692 len=104 tot-seq=1

TGGGGAATCTTCCACAATGGACGCAAGCCTGATGGAGCAACGCCGCGTGAGTGAAGAAGG  
CTTTCGGATCGTAAAGCTCTGTTGATGGTGAAGAAGGATATAGG

>4693 len=104 tot-seq=1

GCTCTGTGCCTGCTGAGAAGAAGTCAGCAGGAGAAGTCAGAGTCCCCCAGAAGTTGAGCC  
CAAGGCAGGGATTTGAGTACAAGTAGATGATTAGGGAGGTGATC

>4694 len=105 tot-seq=1

GCCACTTCTGCTGGGAGATGTCTCTCGCTGGAGGAGGGATGGGATGAATGGCTGCATCA  
AGCCAGGGAGATACATGCTCTGGTGTCTGGACAGAATCAACACCT

>4695 len=105 tot-seq=1

TGGGGAATTTTCGACAATGGGCGAAAGCCTGATCCAGCAACGCCGCGTGCGGGAAGAAGG

CCTTCGGGTCGTAACTTCTTTTGTACGGGACGAAAAAGCTTCTC

>4696 len=105 tot-seq=1

AAGCATGATCCTGGAGGCAGGAGCTGATGCAGAGGTCATGGAGGGGTTGATGCTTACTGG  
CTTGTTCCATGGCTTGCTCATCCTGCCTTCTTATAGAACAGAGGA

>4697 len=105 tot-seq=1

GGCAACAGGACCACCCTGGGGTGGGACTAGCTATAGGCAATAAAGACCAGGCTTTCTCAA  
ACAGATCAGCCCTGAGTAAGTTTAAGGTACAGCATCCAGAAGCAG

>4698 len=105 tot-seq=1

GTGAGTAGGGGAGTGCATGGGAAGTTACGATGAGTCAGGCAGGTCCTTTGGAGCCTCGTG  
TTCTGGCTAAAGGGCTTTGCAAGGGGAGCAATGTGTGGTATTGGG

>4699 len=105 tot-seq=1

AATAGGCTAACCTGGCCAGAGCCTTGAGTTTGCCATCTCTGAGGCATGGAAGAGGATGG  
GTCACATGTGAGCCCTAGTGTGCATGCTCAGGGACAGAGACAGG

>4700 len=105 tot-seq=1

GAAGGTTTTCGGATCGTAAAGCTCTGTTGGTGGTGAAGAAGTGTAGAGGTAGTAACTGGC  
CTGTATTTGACGGTAATCAACCAGAAAGTCACGGCTAACTACGTG

>4701 len=105 tot-seq=1

CCAGCCAAGTAGCGTGAGGGATGACTGCCCTATGGGTTGTAAACCTCTTTTATATGGGAA  
TAACAGAGATTACGTGTTCCCTATTGCATGTACCATAATGAATAA

>4702 len=105 tot-seq=1

TAGGGAATCTCCACAATGGACGCAAGTCTGATGGAGCAACGCCGCGTGAGGGAAGACGG  
TTTTCGGATCGTAAAGCTCTGTTGTTGGTGAAGAAGGATAGTGTT

>4703 len=105 tot-seq=1

GAAGGGTTTTCGGCTCGTAAAGCTCTGTTGTTGGTGAAGAAGGGCAGGGGTAGTAACAGAC  
CTTTATTTGACGGTAATCAATTAGGAAGTCACGGCTAACTACGTG

>4704 len=105 tot-seq=1

GACGCCGCGTGCGGGATGAAGGCCTTAGGGTTGTAAAACGCGTTTGATTGGGCGCAAGAC  
TTTTGGGTGAGTGTACCTTTCGAATAAGCGCCGGCTAACTACGTG

>4705 len=105 tot-seq=1

CCCTTGGTGTACAGACCCTGGGGCCTAGGAGAGAAGAATGGTTTCTGGGGCCAGCCCCA  
TGGCCCTGCTGCTGTGTGCAGCCTCAGGACACTGCTGCCTGCATC

>4706 len=105 tot-seq=1

AGGATGACTGCCCTATGGGGTGTAACTGCTTTTGTAGGGGGATAAAGTTAGGGACGTGT  
CCCTATTTGCAGGTACCATACGAATAAGGCCCGGCTAATTCCGTG

>4707 len=105 tot-seq=1

GAAGGGTTTCGGCTCGTAAATCTCTGTTGTTTGTGAAGAAGGACAGGGTTATTAAGTAC  
CTTTGTTTACGGTAATCAATTAGAAAAGTACGGGCTAACTACGTG

>4708 len=105 tot-seq=1

TTTTTTTTTTCAAGCAGAAGACGGCATAACGAGATCTGATCGTGACTGGAGTTCAGACGTG  
GCTCTCCGATCTCCTACGGGAGGCAGCGGCCGCCAGCAGCCGC

>4709 len=105 tot-seq=1

TAGGGAATCTCCGCAATGGGCGCAAGCCTGATGGAGCAACGCCGCGTGAGGGAAGAAGG  
GTTTCGGCTCGTAAAGCTCTGTTGTTGGGGAAGAAGGAGAGGGGT

>4710 len=105 tot-seq=1

AGAGGGAAAAGGTGTTGATCCAGCAGCCGCGGTAAGTCTAGATCGGAAGAGCGTCGTGTAG  
GGAAGAGTGTGCCAATGTGTAGATCTCGGTGGTCGCCGTATCATT

>4711 len=105 tot-seq=1

TGGGGAATATTGCGCAATGGGCGAAACCTGACGCAGCAACGCCGCGTGCGGGAAGAAGG  
CCTTCGGGTTGTAAACCGCTTTTGTGGGGAGCAAGCTTTCGGGT

>4712 len=105 tot-seq=1

GAAGGCCTTCGGGTTGTAAAGCACTTTCAGCGAGGAGGAAGGGTTAGTCGTTAATAGCGG  
CTAATTTGACGTTACTCGCAGAAGAAGCACCGGCTAACTCTGTG

>4713 len=105 tot-seq=1

TGGGGAATATTCCGCAATGGGCGAAACTCTGACGCAGCGACGCCGCGTGAGGGATGAAGG  
CTTTCGGGTCGTAAACCGCTTTTGTGGGAGCAAGCTTTCGGGT

>4714 len=105 tot-seq=1

TGGGGAATCTTGACAATGGGCGCAACCTGATGGAGCAACGCCGCGTGAGTGAAGAAGG  
GTTTCGGCTCGTAAAGCTCTGTTGTTGGGAGGAAGGTCACGGGT

>4715 len=105 tot-seq=1

TAGGGAATCTCCACAATGGACGCAAGCCTGACGGAGCAACGCCGCGTGAGTGATGAAGG  
GTTTCGGCTCGTAAAGCTCTGTTGTTGGGGAAGAAGGATAGGGGT

>4716 len=105 tot-seq=1

TAGGGAATATTGCACAATGGAGGCAACTCTGATGCAGCCACGCCGCGTGTGTGAAGAAGG  
CCTTCGGGTTGTAAAGCTCTTTTGTGGGGAGGAAGGATTGAGGT

>4717 len=105 tot-seq=1

TGGGGAATCTTCCGCAATGGGCGCAACCCTGACGCAGCAACGCCGCGTGCGGGATGAAGG  
CCTTCGGGTTGTAAACCGCTTTTGTGGGAGCAAGCCTTTGGG

>4718 len=105 tot-seq=1

TGGGGAATATTGCGCAATGGGGGAAACCCTGATGCAGCGACGCCGCGTGTGGGATGAAGG  
CCTTCGGGCTGTAAACCGCTTTTGATTGGGAGCAAGCCTTCTGGG

>4719 len=105 tot-seq=1

GAAGGGTTTCGGCTCGTAAACTCTGTTGTTGGTGAAGAAGGGCAGGGGTAGTAACTGAC  
CTTTGTTGACGGTAATCAAGTAGAAAGTCGCGGCTAACTACGTG

>4720 len=105 tot-seq=1

TGGGGAATATTGCGCAATGGGGGAAACCCTGATGCAGCGACGCCGCGTGCGGGAAGAAGG  
CCTTCGGGTTGTAAACCGCTTTTGTGGGAGGAAGCATTCCGGT

>4721 len=105 tot-seq=1

TGGGGAATCTTGCGCAATGGGGGCAACCCTGACGCAGCGACGCCGCGTGCGTGATGAAGG  
CCTTCGGCTTGTAAACCTCTTTGATTGGGAGCAAGCTTTCGGGT

>4722 len=105 tot-seq=1

TGGGGAATATTGCGCAATGGGGGCAACCCTGACGCAGCGACGCCGCGTGCGGGATGAAGG  
CCTTCGGCTTGTAAACCGCTTTTGTGGGAGCAAGCACTCAGGGT

>4723 len=105 tot-seq=1

GAAGGGTTTCGGCTCGTAAATCTCTGTTGTTGGTGAAGAAGGACAGAGGTAGTAACTGAC  
CTTATTTGACGGTAATCAATTAGAAAATCACGGCTAACTACGTG

>4724 len=105 tot-seq=1

TAGGGAATCTCCACAATGGACGCAAGTCTGATGGAGCAACGCCGCGTGAGGGAAGAAGG



GCTTCGGCTCGTAAACCTCTGTTGTTGGTGAAGAAGGACAGGGGG

>4725 len=105 tot-seq=1

TGGGGAATATTGCGCAATGGGCGGAACCCTGACGCAGCGACGCCGCGTGCGGGATGAAGG

CTTTCGGGTTGTAAACCGCTTTTGATTGGGAGCAAGGCTATTGGG

>4726 len=105 tot-seq=1

TAGGGAATCTTGACAATGGACGCAAGTCTGATGCAGCAACGCCGCGTGAGTGATGAAGG

GTTTCGGCTCGTAAACCTCTGTTGATGGGGAAGAAGGAAAGGGGT

>4727 len=105 tot-seq=1

TGGGGAATCTTGACAATGGACGCAAGCCTGATGGAGCAACGCCGCGTGCGGGATGAAGG

CTTTCGGATCGTAAACCTCTGTTGTTGGTGAAGAAGCATAGGGGT

>4728 len=105 tot-seq=1

TAGGGAATCTTCCGCAATGGGCGCAACCCTGACGCAGCGACGCCGCGTGCGGGAAGAAGG

CCTTCGGCTCGTAAACCGCTTTTGATTGGGAGCAAGCTCTCGGGT

>4729 len=105 tot-seq=1

GAAGGGTTTCGGCTCGTAAAGCTCTGTTGTTGGAGAAGAACGTAAACGGAGAGTAACTGAT

CAGGGAGTGACGGTAACCAACTAGAAAGTCACGGCTAACTACGTG

>4730 len=105 tot-seq=1

AGGGTCCTGGGGATAGTGGCTGTCCCCCAAATCCAGCAAGGCACTCATAATTATTATTT

GTCCTATCTAATCAAGTAATACACAATAAGTTTTTTATTTTTTCC

>4731 len=105 tot-seq=1

GAAGGGTTTCGGCTCGTAAATCTCTGCTGTTGGAGAAGAACGTATCTGAGAGTAACTGGT

CAGGTAGTGACGGTAGCCAACCAGAAAGTCACGGCTAACTACGTG

>4732 len=105 tot-seq=1

TAGGGAATCTTCCACAATGGGGGCAACCCTGATGGAGCAACGCCGCGTGAGTGAAGAAGG

TTTTCGGATCGTAAAGCTCTGTTGTTGGTGAAGAAGGATAGTGGT

>4733 len=105 tot-seq=1

TGGGGAATATTGACAATGGAGGTAACCTCTGATCCAGCAACTCTGCGTGAGTGAAGAAGG

TTTTAGGACTGTAAACACTTTTAGTAGGGAAGAAAAAATGACG

>4734 len=105 tot-seq=1

ATTCAGAACCTCGTAGCAGTGTTCTGGAAACCTATGTGAGGGACAAACACTCTTAACATA  
GCAGCGGTGTTACGAATTCATGTGAGGGACAAACACTGAGAAC

>4735 len=105 tot-seq=1

CCAGCAACGCCGCGTGAAGGAAGAAGGATTTCCGGTTGTAACTTCTTTAAGAGGGACG  
AAGGAAGTGACGGTACCTCTTGAATAAGCCCCGGCTAACTACGTG

>4736 len=105 tot-seq=1

AAGGTTTTCGGATCGTAAAGATCAGTTGTAAGAGAAGAACGAGTGTGAGAGTGAAAGAT  
CACATTGTGACGGTAGCTTACCAGAAAGGGACGGCTAACTACGTG

>4737 len=105 tot-seq=1

TGTTGCTGAGGTCCTTCTCCACTGTATCGCGTCTGAGCATGTAACCTGGTGTGCCAGG  
GGCGTAGAAGGGGAGTTCGCTGTGTGTTGGCACAGCATGAGTAAC

>4738 len=105 tot-seq=1

GCACAGTGCAATGGGCAGGAATAATTCCTGCCAATTAAGCCCTTGCTTCAAAGAAGGAG  
GTCATGCTCCATGGCATATATAAGGCCCAGGAACTTAAAGGCTG

>4739 len=105 tot-seq=1

CCAGCAATTCGGTGTGTGTGAAGAAGGTTTTAGGACTGTAAAACACTTTTAGTAAGTAAG  
AAAGAAATGACGGTACCTACAGAGGAAGCGACGGCTAAATACGTG

>4740 len=105 tot-seq=1

GAAGGCTTGTCTTTTGGCAGTTCAGTGACGCCATTAATAACGCGGTACTTGGGCTCTTT  
GCTCACTTCTGGCGCATCTTTATGATAAAGATCTGCGGTGACGCG

>4741 len=105 tot-seq=1

GGCATAACGAGATAAACTGTGAATGGAGTTCAGACGTGTGCTCTCCGATCTCCTACGGG  
AGGCAGAAGGAGACAAAGAGAGGAGGGGAGAAGGGCATGAAATCT

>4742 len=105 tot-seq=1

GAGCATTGCGATCGCCGCGCGGGTGGCGATATTTAAAGGGGACGCAGCCTATCTGTCA  
GGAGTGGAGCGTGAGTCGGCTCAGCCAATGCGCATGCGTGAGGCA

>4743 len=105 tot-seq=1

CAGCTGAGGCAGTTTCTAGTAGGTAATTGTTCCAAGGTGAATCATTGGAATTACAGGTC  
ATGATGCTATCTCACGGCCATAAATCATCTCATCACATTATCTCT

>4744 len=105 tot-seq=1

TGCTAACAGCATTCTACTATGGAATCAGTAACATGGTGGACCCTTCTGCTGTGCAGAA  
CATGCCTCTGACAGGAATTGAGCATTCCAAGCCTAGGTCATAGG

>4745 len=105 tot-seq=1

GACTGGCCCCTACCGTTTCAAAGGGACAGGTCACAGGCTGAGCAGGATGGGGCGGCAGG  
GGCAGGCTGCCTCCCCACACGCAGAGGTCCCACCCAGCTCCCTA

>4746 len=105 tot-seq=1

CCCATGCCTGGTGTGGTCTCATTGCAGTGTCTCTCTCTCCTTGGCCACACCTGCAGTA  
CATCTTCGAAGTCAAGAAGCCAGAAGATGAAGTCTGATCTGCAT

>4747 len=105 tot-seq=1

GATGCAGCGACGCCGCGTGAGCGAAGAAGTATTCGGTATGTAAAGCTCTATCAACAGGG  
AAGATAATGACGGTACCTGACTAGGAAGCCCCGGCTAACTACGTG

>4748 len=105 tot-seq=1

CCAGCAATTCTGTGTGTGTAAGAAAAAGTTTTAGAACAATAAAACACTTTTAGTAGGGGAG  
AAAAAATGACGGTACCTACAGAAGAAGCAACGGCTAAATACGTG

>4749 len=105 tot-seq=1

GGAAGAGGGATGAACAACAATTAATTTGGATGGATTTGGAGCTGAAAGGAGTTACTGTCT  
GTCTATAATTCTTCCCTTCATTCCAGATTTCAGGACTTTCAAGG

>4750 len=105 tot-seq=1

GAAGGGTTTCGGCTCGTAAAGCTCTGTTGTTGGTGAAGAAGGATAGGAGTAGTAACTGAC  
CTTTGTTGACTGTAATCATTTAGAAAAGTCACGGCTAACTACGTG

>4751 len=105 tot-seq=1

GTGAGAGGAGTGCCAGCAGGTGAGACATTTGAAAGAGAGACTGAGAGTTAGAATATGTGC  
GAGAGGGAAGGAAAGGGAGAGACAGAGAGAAGGGGAATCCTGTGA

>4752 len=105 tot-seq=1

GGGCAGAGAGGCAAGCCTGCCAGGGTGGCCAGAGCTGTGTGCCCTGCAGAGCTTCTGAAC  
TGGACATACAGGTCCAGTCCAAAAGTAGTGTCCAGGGAGCACCC

>4753 len=105 tot-seq=1

TCCACCCACAGGTGGGGTATGGAGACCGCCCGCTTCTTCTATTCCATGATGCTGTGGC

TCTGGGCTGTTGGCTGTCCTCAGTTGCGCTTGGGATTCCTGCCAG

>4754 len=105 tot-seq=1

GATGCAGCGACGCCGCGTGAAGGACGAAGTATTCGGTACGTAACTTATATAAGCAGGG

AAGAAAATGACGGTACCTGACCAAGAAGCCCCGGCTAACTACGTG

>4755 len=105 tot-seq=1

GGGAGGAAGGTACAGAGTATCGTAAACCTCTTTTTTCAGGGAACAAAGGCTGGGACGTGT

CCCCGGATGAGTGTACCTCAAGAAAAAGCATCGGCTAACTCCGTG

>4756 len=105 tot-seq=1

GAACCAGCCAAGTAGCGTGAGCGATGAAGGCTTTCGAGTCGTAAAGCTCTGTCCTATGGG

AAGATAATGACGGTACCATAGAAGAAAGCCCCGGCTAATTACGTG

>4757 len=106 tot-seq=1

TGGGGAATATTGGACAATGGGCGCAAGCCTGATGCAGCCATGCCGCGTGAGTGATGAAGG

TCCTAGGGTCGTAAAGCTCTTTCCTGTTGAAGATAATGACGGTAA

>4758 len=106 tot-seq=1

TGGGGAATTTTGCACAATGGGCGCAAGCCTGATCCAGCAACGCCGCGTGAGTGAAGAAGG

CCTTCGGGTTGTAAAGCTCTTTTGTCTGGGAAAGAAAACCTCTGTCC

>4759 len=106 tot-seq=1

AAAAAGTCAAGTAAAGTTTGTGCAGCCCATACATCCTTGAATTCATGGCCTTGTGCTGTC

ACACCTACCAGGACAACACACTTACAGAAAACCTGACTCCACATTTT

>4760 len=106 tot-seq=1

TGGGGAATATTGCACAATGGGCGCAAGCCTGATGCAGCCATGCCGCGTGATGAAGCAGG

TCTTCGGGGTGTAAAGTACTTTCAGCGGGGCGGAAGGCGATAAGGT

>4761 len=106 tot-seq=1

TAGGGAATCTTCCACAATGGACGCAAGTCTGATGGAGCAACGCCGCGTGAGTGAAGAAGG

GTTTCGGCTCGTAAAGCTCTGTTGGCAGGGAAGAAAGGTAGAGGAC

>4762 len=106 tot-seq=1

AGGGTAGAGGCCAGGCTGGAAGTGAGATGGGCAGCAGGGCCCCGTGGCAGGGGCTGGCCT

GCCAATCAAACAAAGGCTGTAGTTGCGGAATAAAGCCCCACATTTCC

>4763 len=106 tot-seq=1

TGGGGAATCTTGCACAATGGGCGAAACCTGATGCAGCGACGCCGCGTGCGGGAAGAAGG  
CCTTCGGCTCGTAAACCGCTTTTGATTGGGAGCAAGCTTTCGGGTG

>4764 len=106 tot-seq=1

TAGGGAATCTTCCACAATGGACGAAAGTCTGATGGAGCAACGCCGCGTGAGAGTAACTGT  
TCACGCAGTGACGGTATCCAACCAGAAAGTCACGGCTAACTACGTG

>4765 len=106 tot-seq=1

TAGGGAATCTTCCACAATGGACGCAAGTCTGATGGAGCAACGCCGCGTGAGTGAAGAAGG  
GTTTCGGCTCGTAAAGCTCTGTCGGTGGGGAAGAATGACAGGGGTA

>4766 len=106 tot-seq=1

TAGGGAATCTTCCACAATGGACGCAAGTCTGATGGAGCAACTCTGCGTGTGTGAAGAAGG  
TTTTCGGATCGTAAAGCTCTGTTGTTGGTGAAGAAGGAAAGAGGTA

>4767 len=106 tot-seq=1

AGAAGGGTTTCGGCTCGTAAAGCCCTGTTGTTGGTGAAGAAGGATAGAGGTAGTAACTGG  
CCTTTGTTTGACGGTAATCAATTAGAAAGTCACGGCTAACTACGTG

>4768 len=106 tot-seq=1

TGGGGAATCTTCCGCAATGGGCGCAACTCTGACGGAGCGACGCCGCGTGCGGGAAGAAGG  
CCTTCGGGTCGTAAACCGCTTTTGTTGGGAGCAAGCTTTCGGGTG

>4769 len=106 tot-seq=1

AACCAGCCTAGAGTGTCTGCAGTAAGTATTGACTCAGAGAAAGGCAGGGCAGTAAAGGCA  
TATTTCCCAAGGAAGGAGGCCTTCTGGTATCAGCATTCAAGTTC

>4770 len=106 tot-seq=1

AGGAGTGTGCCACATTAGCATGCTGGAATAATTTAATACATCCTTCTTTAAAAAATGGG  
CTTTTTGAGTAACAAGCATCCTAATGATCAATTCTGTCATTTTCATT

>4771 len=106 tot-seq=1

AGAAGGTTTTTCGGCTCGTAAAGCTCTGTTGTTGGTGAAGAACGTGCGGGAGAGTAACTGT  
TCACTCAGTGACGGTATCCAACCAGAAAGTCACGGCTAACTACGTG

>4772 len=106 tot-seq=1

TGGGGAATCTTGCACAATGGGCGAAAGCCTGATGCAGCGACGCCGCGTGCGGGATGAAGG  
CCTTCGGGTGAGTGTACCTTTCGAATAAGCGCCGGCTAACTACGTG

>4773 len=106 tot-seq=1

TAGGGAATCTTCCACGATGGACGCAAGTCTGATGGAGCAACGCCGCGTGAGGGAAGAAGG  
GCTTCGGCTCGTAAAGTTCTGTTGTTGGGGAAGAAGGACAGGGGTA

>4774 len=106 tot-seq=1

TGGGGAATCTTGCGCAATGGGGGCAACCCTGACGCAGCGACGCCGCGTGAGGGATGAAGG  
CCTTCGGCTTGTAACCGCTTTTGATTGGGAGCAAGCCTTCGGGTG

>4775 len=106 tot-seq=1

TAGGGAATCTTCCGCAATGGACGCAAGTCTGACGGAGCAACGCCGCGTGAGGGAAGAAGG  
GTTTCGGCTTGTAAGCTCTGTTGTTGGGGAAGAAGGAGTGGGGTA

>4776 len=106 tot-seq=1

AGCACTCTGTAAATGGACCAATCAGCAGGATGTGGGCGGGGACAAATAAGGGACTAAAA  
GCTGGCGACCCGCCCACTCCCTCCAGTCCCTCCAGTCCCTCCAG

>4777 len=106 tot-seq=1

TAGGGAATATTCCACAATGGGCGCAACCCTGACGCAGCGACGCCGCGTGCGGGATGAAGG  
CCTTCGGGTTGTAAGCGCTTTTGTTGGGAGCAAGCTTTCGGGTG

>4778 len=106 tot-seq=1

GTTACCCCCAAATTCCCAGGAAAGAATAAAGAGGAAATAAGTGCAGCAGGACAGCAGCA  
AGGACTGACATTAGAGAGAAGGAAGAATTTCCAATGCCAAAAGAA

>4779 len=106 tot-seq=1

TGATGCAGCGACGCCGCGTGAACGAAGAAGGCTTTCGAGTCGTAAAGTTCTTTTATATGG  
GAAGATAATGACGGTACCATAGGAGGAAGCCACGGCTAACTACGTG

>4780 len=106 tot-seq=1

TGATGAAGCAATACCACGTGAGTGATGAAGGTTTTCGGATCGTAAAGCTCTGTCTTTGGG  
GAAGATAATGACGGTACCCAAGGAGGAAGCCACGGCTAACTACGTG

>4781 len=106 tot-seq=1

GGGAGGCGGCAGGGATGGCAGGGCAGAGGGAGGCAGGAGACTCTTTAGCTTTAGGAGGCC  
GTGGTAGGATCCTGGAGTGGAGGACGGTGCCGTGCCACAGTGGCAG

>4782 len=106 tot-seq=1

CTGATGCAGCGACGCCGCGTGAGCGAAGAAGTATTCGGTATGTAGAGCTCTATCAGAAG

GGAAGAGAGTGATGGTACCTTACTAAGAAGCTCCGGCTAAATACGT

>4783 len=106 tot-seq=1

CAAGCAGAAGACGGCATAACGAGATAAACAAGTGTGACTGGAGTTCAGACGTGTGCTATCCGA

TTCCTACGGGAGGCAGCGGCCGCGGTAATATTGAGATCGGAAGAG

>4784 len=106 tot-seq=1

AGGTAGTGACGAAAATAACAATACAGGACTCTTCGAGGCCCTGTAATTGGAATGAGGC

CACTTTAAAGCCGGTAACGAGGATCCATTGGAGGGCAAGTCTGGTG

>4785 len=106 tot-seq=1

AATCGCTTGAACCCAGCAGCCGCGGAATCCGCAGATCGGAAGAGCGTCGTGTAGGGAAAG

AGTGCGCCAATGTGTAGATCTCGGTGGTCGCCGCATCATTAAAAAA

>4786 len=106 tot-seq=1

TAGGGCAGGGTTGGGTACAGTATCTGGCATTGCTCCTGGAGTGAGGCAGAGGTTATTGTT

CTGGAGGTTCAAGTGTAAAATAGGAAGAAAGGGAACAGGCTAGTGCC

>4787 len=106 tot-seq=1

GGGTGCTTGAGGCCAGAAGTTCGAGGTAACAGTGAATCATGATTGTGCCCTTCATCCCA

GCCTGAATGACAGAGCGAGACCCTATCTCTAACAAAACCTATATGAT

>4788 len=106 tot-seq=1

TAGGGAATCTTACACAATGGACGCAAGTCTGATGGAGCAACGCCGCGTGCCTGAAGAAGG

TTTTCGGATCGTAAAGCTCTGTTGTTGGTGAACAAGGATACAGGTA

>4789 len=106 tot-seq=1

AGGAAAAGAGAGGAAGCAACAAAGAGAGGGAAACCTGCTATCGTAGCCAATGACCCCTCC

AAGAGGGAAAGGCAGTCCACACAGAGGACCCTGCCTCTGATGAAGC

>4790 len=106 tot-seq=1

TGAGCCAGCCATGCCGCGTGAGTGATGAAGGCCTTAGGGTGGTAAAGCTCTTTGTCCGG

GACGATAATGACGGTACCGGAAGAATAAGCCCCGGCTAACTTCGTG

>4791 len=106 tot-seq=1

GAAGGTGTTGCGATCGTAAAGCGCTGTTGTAAGAGAAGAACGTGTGTGAGAGTGTAATT

TCACACAGTGACGGTAACTTACCAGAAAGGTACGGCTAACTACGTG

>4792 len=107 tot-seq=1

TGGGGAATATTGCACAATGGGCGAAAGCCTGATCCAGCCATGCCGCGTGTGTGAAGAAGG  
TCTTCGGATTGTAAAGCACTTTAAGCTGGGAGGAAAATCAGTTTCCT

>4793 len=107 tot-seq=1

CAAAAAAAAAACAAAAAAAAACAGCACAAATGAAGGTGAGGTTGATACTTGGACAAGA  
AAATTGTTTTGACACATGTGAAAACACCACTTGAGTTTTATATGTTC

>4794 len=107 tot-seq=1

AGCTGCCTCCTACCTTCAGCACACACCTCTTGACCCAGCAAGGTTCCCTCCCTGTCGTCC  
CTTCAATCTTTATTTCTGGAAACCAGGCTACTCTGGTTATGGAGATA

>4795 len=107 tot-seq=1

AAGAAGGGTTTCGGCTCGTAAAGCTCTGTTGTTGGTGAAGAAGGACAGGAAAAAAAACTG  
ACCAAGATTTGACGGTAATAAAAAAGAAAGTCACGGCTAACTACGTG

>4796 len=107 tot-seq=1

TGGGGAATATTCCGCAATGGGGGAAACCCTGACGCAGCAACGCCGCGTGCGGGATGAAGG  
CCTTCGGGTCGTAAACCGCTTTTGATTGGGAGCAAGACTTTTGGGTG

>4797 len=107 tot-seq=1

TGGGGAATATTGCGCAATGGGCGAAACTCTGACGCAGCGACGCCGCGTGAGGGATGAAGG  
CTTTCGGGTTGTAAACCGCTTTTGATTGGGAGCAAGCCTTTTGGGTG

>4798 len=107 tot-seq=1

CTCTGTCTTGGGCACTGTATTAGATTCTAGAGCTGAGCAACAAGAACA AAACTCAATCT  
AAAAAATAAAAATAATAAAGTAAAATCCAACATCGCCACAGTCCGC

>4799 len=107 tot-seq=1

TAGGGAATCTCCACAATGGGCGCAAGCCTGATGGAGCAACACCGCGTGAGGGAAGAAGG  
GTTTCGGCTCGTAAAGCTCTGTTGTTGGAGAAGAAAGTGGGCGAGAG

>4800 len=107 tot-seq=1

TAGGGAATCTCCACAATGGACGCAAGTCTGATGGAGCAACGCCGCGTGAGGGAAGAAGG  
TTTTCGGATCGTAAAGCTCTGTTGTTGGGGAAGAAGGACAGAGGAAG

>4801 len=107 tot-seq=1

AGCGACGCCGAGTGCGGGATGAAGGAATTAGGGTTGTAAAAAGAGGGTGATTGGGAGAAA  
GATTTAGGGTGAGTGACCTTTCGAATAAGCGCCGCTAACTACGTG



>4802 len=107 tot-seq=1

AAAAGTAGTGGCCACTGCCATTTCCAAGGACATAATGCTTCCCACCAATTTTACTCATC  
AGCGTTGCCCCCTGGCATTCCACCCCTCGAGTAACGCCAACACCCAG

>4803 len=107 tot-seq=1

GCAGCAACGCCGCGTGCCTGATGGCGGCCTTCGGGTTGGAAACCGCTTGCCTGTGACG  
AAGCGTGAGTGACGGTAATGGGTAAAGAAGCACCGGCTAACTACGTG

>4804 len=107 tot-seq=1

TAGGGAATATTGCACAATGAGCGAAAGCCTGATGGAGCGACACAGCGTGCAGGATGAAGG  
CCTTCGGATTGTAAAGTGCTTTATAAGGGAAGAACATTTGCAGTAG

>4805 len=107 tot-seq=1

AAGAAGGGTTTCGGCTCGTAAAGCTCTGTTGTTGGTGAAGAAGGATAGAGTTAGTAACTG  
ACCTTTGTTTGACGGTACTCAATTAGAAAGTCACGGCTAACTACGTG

>4806 len=107 tot-seq=1

TAGGGAATCTTCCACAATGGACGCAAGCCTGATGGAGCAACGCCGCGTGAGGGAAGAAGG  
CCTTCGGATCGTAAACCTCTGTTGTTAGAGAAGAACACGAGTGAGAG

>4807 len=107 tot-seq=1

AAGAAGGGTTTCGGCTCGTAAAGCTCTGTTGTTGGTACGAAGGACAGGGGTAGTAACTG  
ACCTTTGTTTTTCGTTTCATCAATTAGAAAGTCACGGCTAACTACGTG

>4808 len=107 tot-seq=1

TGGGGAATCTTGCACAATGGGCGCAAGCCTGATGCAGCGACGCCGCGTGCGGGATGAAGG  
CCTTCGGGTCGTAAACCGCTTTTGTGGGAGCAAGCCTTTTGGGTG

>4809 len=107 tot-seq=1

TGGGGAATATTGACAATGGAGGCAACTCTGATCCAGCAATCCGCGTGTGTGAAGAAGG  
TTTTAGGACTGTAAACCCCTTTTAGTAGGGAAGAAAGAAATGACGGT

>4810 len=107 tot-seq=1

TAGGGAATCTTCCACAATGGACGCAAGCCTGATGGAGCAACGCCGCGTGAGTGAGGAAGG  
GCTTCGGATCGTAAAGCTCTGTTGTTGGTGAAGAAGGGCAGGGGTAG

>4811 len=107 tot-seq=1

TAGGGAATATTCCACAATGGACGCAAGTCTGACGGAGCAACGCCGCGTGAGTGAAGAAGG

CTTTCGGATCGTAAACCTCTGTTGTTGGTGAAGAAGGATAGAGGTAG

>4812 len=107 tot-seq=1

TGGGGAATATTGCGCAATGGGCGAAACCCTGACGCAGCAACGCCGCGTGAGGGATGAAGG

CCTTCGGGTTGTAAACCGCTTTTGATTGGGAGCAAGGCTTTTGGGTG

>4813 len=107 tot-seq=1

AGAAGGCTCTGGGTTGTAAAGCTCTTCGGCCGGGAAGAAGGGTCTGCATGCGAACAGC

ATGCAGATTTGACGGTACCGGAAGAAGAAGGACCTGCTAACTTCGTG

>4814 len=107 tot-seq=1

TAGGGAATATTCCACAATGGACGCAAGCCTGACGGAGCAACGCCGCGTGCGTGAAGAAGG

CTTTCGGATCGTAAAGCTCTGTTGTTGGGAGCAAGGATAGTGGTAG

>4815 len=107 tot-seq=1

TAGGGAATCTCCACAATGGACGCAACCCTGATGGAGCAACGCCGCGTGAGTGAAGAAGG

GTTTCGGCTCGTAAAGTTCTGTTGTTGGTGAAGAAGGTCAGGGGAAG

>4816 len=107 tot-seq=1

CCAGGACTCTCCCTCCGCCGCCACGTTTGCAGGGAGCCCCTGAGAGGCAGCGGCA

GCCCGGATGCTGAATCCATTCCGCCCGGTCATTTCCGGAGCGTCTT

>4817 len=107 tot-seq=1

TAGGGAATCTCCACAATGGACGCAAGTCTGATGGAGCAACGTCGCGTGAGTGAAGAAGG

GTTTCGGCTCGTAAACTTCTGTTGTTGGTGAAGAAGGACGGGGGTAG

>4818 len=107 tot-seq=1

TAGGGAATCTCCACAATGGGCGCAAGCCTGATGGAGCAACACCGCGTGAGTGAAGAAGG

GTTTCGGCTCGTAAAGCTCTGTTGGTGGAGAAGAAAGTATCTGTGCG

>4819 len=107 tot-seq=1

TAGGGAATATTCCACAATGGACGCAAGTCTGATGCAGCAACGCCGCGTGAGGGAAGAAGG

TTTTCGGATCGTAAAGCTCTGTTGTTGGTGAAGAAGGCTAGAGGTAG

>4820 len=107 tot-seq=1

TAGGGAATCTCCACAATGGGCGCAAGCCTGATGGAGCAACGCCGCGTGAGTGAAGAAGG

TTTTCGGATCGTAAGTAATCAACCAGAAAGTCACGGCTAACTACGTG

>4821 len=107 tot-seq=1

TGGGGAATCTTGACAATGGGCGAAAGCCTGACGCAGCGACGCCGCGTGCGGGATGAAGG  
CCTTCGGGTTGTAAACCGCTTTTGTGGGAGCAAGCCCTGTGGGTG

>4822 len=107 tot-seq=1

GCAGGATGACGGACCTATGGGTTGTAAACTGCTTTTATATGGGGATAAAGTGGGGAACGG  
GTTCCCGTTTCCAGGTACCATATGAATAAGGACCGGCTAATTCCGTG

>4823 len=107 tot-seq=1

TAGGGAATCTTCCACAATGGACGCAAGCCTGATGGAGCAACGCCGCGTGAGTGATGAAGG  
CCTTCGGATTGTAAAGCTCTGTTGTTGGTGAAGAAGGATAGAGGTAA

>4824 len=107 tot-seq=1

CAGTAGCAGCCTCTCAGCAGGACAAGGGGCCAACCTAGAGTCCCCTTTGCTGTGGTGAC  
TCCCAAGAACTGTGATGGCTCACCTGGGGGAAGTTCTAGAAGCTCC

>4825 len=107 tot-seq=1

TGGGGAATATTGCGCAATGGGCGAAACCCTGACGCAGCGACGCCGCGTGCGGGATGAAGG  
CCTTCGGGTCGTAAACCGCTTTTGTGGGAGCAAGCTTTGGGGTGA

>4826 len=107 tot-seq=1

CAGGGTGATGCGGGTAAGGCCATACAAAAGGCCGACAGCGGATACCCGCGAGGATCAG  
TTTGTCTGTGTCATGGGTATGACGAAATCCGCCTCTGCGGTCATGA

>4827 len=107 tot-seq=1

CTGGTGACGCGACGTCGCGTGAGCGAAGAAGTATTCGGTGTGTAAAGCTCTATCAGAAG  
GGAAGAAAATGACGGTACCTTACTAAGAAGCTTCGGCTAAATACGTG

>4828 len=107 tot-seq=1

CCTTTAAATTGTACCGTCTTGAGCATAGAAAAGCCTGAATTATGTAAAAGCTGGCCAGAT  
GCCACATCTGGCAACAGTCAGGTTGTTGGTAAGCAGGAGGTTCCC

>4829 len=107 tot-seq=1

TTAATTCTCCGTGGCATTAGCTCCCCTGCCCCACCATGCTCCAGCACCTACTGGGGTGCC  
TGGCTTGACTCCCCGGCTCTACAAAACAGCCATCTTCCTTTGTCCTT

>4830 len=107 tot-seq=1

CCCTGATGCAGCAACGCCGCGTGAGTGATGAAGGTTTTCGGATCGTAAAGCTCTTTCTAT  
GGGAAAGATAATGACGGTACCCAGGGAGGAAGCCACGGCTAACTACG

>4831 len=107 tot-seq=1

CTGATGCAGCAACGCCGCTGAGTGATGAAGGTTTGAGGGTAGTAAAGCTCTGTGGTGGG  
GGAAGATAATGACGGTACCCAAGGAGGAAGCGACGGCTAACTACGTG

>4832 len=107 tot-seq=1

TAGGGAATCTTCGGCAATGGACGGAAGTCCGACCGAGCAACGCCGCTGAGGGAAGAAGG  
TTTTCGAATCGTAAAGCTCTGTTGTAAGGGAAGAACGAGTGTGAGAG

>4833 len=107 tot-seq=1

AAGACGCTACAGGAGCAGGGTGAGAGGCTGCGAAAGCAGGAGCAGAGGCTACGCAAACAG  
GAGGAGAGGCTGCGAAAGGAGGAGGAGGCTGCAAAGCAGGAAAA

>4834 len=107 tot-seq=1

GAACACCGGGTCCAGGCCGCAAAGCTCAATGGCGTGGTAGACAGCCTTGTGGCAGTGGCG  
GGCCACCAGAACCTGGTCCCCCGGCGGGTGGCCGCCCGGATGGCCG

>4835 len=107 tot-seq=1

GAGGTAGTGACGAAAAATAACAATACATGACTCTTTCGAGGCCCTGTAATTGGAATGAAT  
CCACTTTAAATCCTTTAACGAAGATCCATTGGAGGGCAAGTTTAGTG

>4836 len=107 tot-seq=1

CTTGGGTTACCCCTAGGGTCAGGTCATCACCATTTGCCTCATCTCCTCCACAGCCAACT  
TGGAAGGATTCCCAGCCTTGTGCCAGGAGAGGCTGGCACGGCTGCC

>4837 len=107 tot-seq=1

AAGAAGTTTTTCGGATCGTAGAGCTCTGTTGTTGTTGAATAAGGATAGAGGTAGTAACTG  
GCCTTTATTTGACGGTAATCAACCAGAAAGTCACGGCTAACTACGTG

>4838 len=107 tot-seq=1

TAGGGAATCTTCCACAATGGACGCAAGTCTGATGGAGCAACGCCGCTGAGTAGTAACTG  
GCCTTTATTTGACGGTAATCAACCAGAAAGTCACGGCTAACTACGTG

>4839 len=107 tot-seq=1

TGCATTTCAATATCTGGGGAAAAGCATCTCAGTCCAGGGACTGGCAGATGTCACAGCTCA  
GAGGTGGGAGCTGCCCTGAGGGAGTGTGTCCCGGAACGACCAGGAGG

>4840 len=107 tot-seq=1

AAGGAGAATGAGGAGTACATCTTGGTTTGTGTCTAGGTGAGTTTGAGGGGACATCACACT

GGAGTTGGCTCCAACCTTTGCTAGCATAAAATAAATGTGTTAGATGAT

>4841 len=107 tot-seq=1

ATGAAGTTCTTCGGATCGCAAACTCTGTTATTAGGGAATAACAAACGTGTAAGTAACTG

TGCACGTCTTGACGGTACCTAATCAGAAAGCCACGGCTAACTACGTG

>4842 len=107 tot-seq=1

CTGATACAGCGACGCCGCGTGAGGGAAGAAGGTTTTCGGATTGTAAACCTCTGTTCTTAG

TGACGATAATGACGGTAGCTAAGGAAAAAGCACCGGCTAACTACGTG

>4843 len=107 tot-seq=1

GCAGGATGACGGCCGTATGTGTTGTAACTGCTTTTGTGGGAATAATCGACATGACGT

GTAATGTTGTGCATGTACCATTGAATAAGGACCGGCTAATTCCGTG

>4844 len=107 tot-seq=1

GAATTCTTGAACCCAGGAGTTCGAGACCAACCTGGGCGACATGGTGAACTCTGTCTCTA

TAGAAAATAAAAAAATTAGCTGGGTGTGGTGGCACATGCCTGTAGTC

>4845 len=107 tot-seq=1

CTGATGCAGCGACGCCGCGTGAGCGAAGAAGTATCTCGGTATGTAAAGCTCTATAGGCAG

GGAAGAAAATGACGGTACCTGACGAAGAAGCCCCGGCTAACTACGTG

>4846 len=107 tot-seq=1

CGGATGCAGCGACGCCGCGTGAGCGATGAAGTATTCGGTATGTAAAATATATCAGCAG

GGAAGAAAATGACGGTACCTGACTAAGAAGCACCGGCTAAATACGTG

>4847 len=107 tot-seq=1

GGAAGGTTACCAAGGAAAAAAAAAAAAAATGAAGTCAAGGGAATAAGAAAATCCCCAGGAC

TTCTACCCGACCCAATGCAATAAACGCGATAGAGACAAACCCTGGAG

>4848 len=107 tot-seq=1

AGAAGGTTTTCGGATCGTAAAGCTCTGTTGTAAGAGAAGAACGAGTGTGAGAGAGGAAGG

TTCACACTGTGACGGTAACTTTGAAAAAGGGACGGCTAACTACGTG

>4849 len=107 tot-seq=1

CTGATGCAGCGATGCCGCGTGAGCGAAGAAGTATTCGGTATGTAAAGCTCTATAAGCAG

GGAAGAAAATGACGGTACCTGACGAAGAAGCTCCGGCTAAATACGTG

>4850 len=108 tot-seq=1

TTTTTTTTCAAGCAGAAGACGGCATAACGAGATAAGGCCGTGATGGAGTTCAGACGTGTGC  
TCTCCGATCTCCTACGGGAGGCAGTAGTCGGGCCGCCTCAGCTATGA

>4851 len=108 tot-seq=1

TACAACACCTGGATGTCTGCTAGCTTTACTTTCTCTGGCAGCCACTAGAGCAGCATAACAG  
GGGAATTGCTTCAGGACCTAGGCATTGAGAGACTTTCCATGGAGGGCT

>4852 len=108 tot-seq=1

CCTATAGGAGGTGGGAACCCAGAGCATTGTAGACCAGTCAGAGCCTACAGCCCTAAAGG  
ACCTGGCCTAGCCACACCCAGTGTGTTGAAGAACCCCACTACCACAAGT

>4853 len=108 tot-seq=1

TGGGGAATATTGCACAATGGGGGAAACCCCGATGCAGCAACGCCGCGTGAGTGAAGAAGG  
ATTCGGTATGTAAAGCTCTATCAGCAGGGAAGATAAAGACGGTTTCT

>4854 len=108 tot-seq=1

GAGTGGGAATGGAATGGGGTCTTCAAAGGGGAGACCTGGAAAGGGGAAAACATTTGAA  
ATGTAAATAAAGAAAATATCCAAGAAAGAAAAAGAGGCAGAGGCCAGA

>4855 len=108 tot-seq=1

TCAAGCAGAAGACGGCATAACGAGATGGCAATGTGACTGGAGTTCAGACGTGTGCTCTTCC  
GTTCTCCTACGGGAGGCAACAGCATAGCCTGGGAGGGTGAGTGGTTAC

>4856 len=108 tot-seq=1

AACAGAAGAACGGCGCGGGGTTGGGGGAAGGGAGCGGGTGCCGAGACTCACACGAGGGC  
CTGGAGCCGGGGACGGGGAGAGGAGACTCGGGACACAGCCTCTGAGTA

>4857 len=108 tot-seq=1

TGGGGAATATTGCACAATGGGCGCAAGCCTGATGCAGCCATGCCGCGTAATTCGTAGAT  
CGGTAGAGCGTCGTGTAGGGAAAGAGTGTGCCAATGTGTAGATCTCGG

>4858 len=108 tot-seq=1

TGGGGAATATTCCGCAATGGGGGCAACTCTGATGCAGCGACGCCGCGTGCGGGATGAAGG  
CCTTCGGCTCGTAAACCGCTTTTGTGTTGGGAGCAAGCTCTCGGGTGAG

>4859 len=108 tot-seq=1

TAGGGAATCTTCCACAATGGGCGAAAGCCTGATGGAGCAACGCCGCGTGGGTGAAGAAGG  
TCTTCGGATCGTAAACTCTGTCGTTGGAGAAGAACGTGCGTGAGAGT

>4860 len=108 tot-seq=1

GAAGAAGGGTTGCGGCTCGTAAAGCTCTGTTGTTGGTGAAGAAGGACAGAGGTAGTAACT  
GGCCTTGGTTTGACGGTAATCAATTAGAAAAGTCACGGCTAACTACGTG

>4861 len=108 tot-seq=1

CAGCGACGCCGCGTGGGGGATGACGGCCTTCGGGTTGTAACTCCTTTCCTAGGGACGA  
AGTGTATTTGTGACGGTACCTGGAGAAGAAGCACCGGCTAACTACGTG

>4862 len=108 tot-seq=1

TCGGGAATCTTCCACAATGGACGCAACCCTGATGGAGCAACGCCGCGTGAGTGAAGAAGG  
TTTTCGGCTCGTAAAGCTCTGTTGTTAGTCAAGAACGACAGGGAGAGT

>4863 len=108 tot-seq=1

TAGGGAATCTTCGGCAATGGACGCAAGTCTGATCGAGCAACGCCGCGTGAGTGAAGAAGG  
TTTTCGGATCGTAAAGCTCTGTTGTTAGAGAAGAAGGAGAGGGGGAGT

>4864 len=108 tot-seq=1

GAAGAAGGGTTTCGGCTCGTAAAGCTCTGTTGTTGGTGAAGAAGGATAGAGGTAGTAACT  
GACCTTTATGTGACGGTAATCAATTAGAAAAGTCACGGCTAACTACGTG

>4865 len=108 tot-seq=1

TGGGGAATCTTCGACAATGGGCGCAAGCCTGATCCAACAATACCGCGTGAGTGATGAAGG  
CCTTCGGGTCGTAAAGCTCTTTTACCAGGGATGATAGTGACAGTACCT

>4866 len=108 tot-seq=1

TGACCCAGCAACGCCGCGTGAAGGAAGAAGGCTTTCGGGTTGTAACTTCTTTTGTCAAG  
GACGAAACAAATGACGGTACCTGACGAATAAGCCACGGCTATCCACGT

>4867 len=108 tot-seq=1

TAGGGAATCTTCCACAATGGACGAAAGTCTGATGGAGCAACGCCGCGTGCGTGAAGAAGG  
CTTTCGGATCGTAAGGCTCTGTTGTTGGTGAAGAAGGATAGAGGTAGT

>4868 len=108 tot-seq=1

GAAGAAGGGTTTCGGATCGTAAAGCTCTGTGGTTGGTGAAGAAGGACAGAGGTAGTAACT  
GGCCTTTATTTGACGGTAATCAAATAGAAAAGTCACGGCTAACTACGTG

>4869 len=108 tot-seq=1

TGGGGAATATTCCACAATGGACGCAAGTCTGATGGAGCAACGCCGCGTGAGTGAAGAAGG

TTTTCGGATTGTAAAGCTCTGTTGGTGGTGAAGAAGGATAGAGGGAGT

>4870 len=108 tot-seq=1

CAATGCTGTTTTCTTCTTCTTTAAGTGTATAACATTTTTACCCTCTTCCAGATGCAG

CAGCCCCAGCAGCCCCAGCCCCAGCAGCCTCCCCAGCCCCAGCAGTCC

>4871 len=108 tot-seq=1

TAGGGAATCTTCCACAATGGGCGCAAGCCTGACGGAGCAACACCGCGTGAGGGAAGAAGG

GTTTCGGCTCGTAAAGCTCTGTTGTTGGGGAAGAACGTGGGTGGGAGT

>4872 len=108 tot-seq=1

TAGGGAATCTTCCACAATGGACGAAAGCCTGATGCAGCAACGCCGCGTGCGTGAAGAAGG

CTTTCGGGTCGTAAAGCTCTGTTGTTGGTGAAGAAGGTTAGAGGTAGT

>4873 len=108 tot-seq=1

TAGGGAATCTTCCACAATGGGCGCAAGTCTGATGGAGCAACGCCGCGTGAGGGAAGAAGG

ATTTCCGGATCGTAAAGCTCTGTTGTTGGTGAAGAAGGATAGGGGAAGT

>4874 len=108 tot-seq=1

GAAGAAGGGTTGCGGCTCGTAAAGCTCTGTTGTTGGTGAAGAAGGACAGGGGGAGTAACG

GACCTTTGTTTGACGGTAATCAATTAGAACTCACGGCTAACTACGTG

>4875 len=108 tot-seq=1

TAGGGAATCTTCCACAATGGACGAAAGCCTGATGCAGCAACGCCGCGTGCGGGATGAAGG

TTTTCGGATTGTAAAGCTCTGTTGTTGGTGAAGAAGGATAGAGGTAGT

>4876 len=108 tot-seq=1

TAGGGAATCTTCCACAATGGACGCAAGTCTGATGGAGCAACGCCGCGTGAGTGAAGAAGG

GTTTCGGATCGTAAAGCTCTGTTGTCAGTGAAGAAGGACTGGGGGAGT

>4877 len=108 tot-seq=1

GAAGAAGGGTTTCGGCCGTAAAGCTCTGTTGTTGGTGAAGAAGGACAGGGGTAGTAACT

GACCATTGTTTGACTGGAATCAATTAGAAAGTCACGGCTAACTACGTG

>4878 len=108 tot-seq=1

TAGGGAGTCTTGACAATGGACGCAAGTCTGATGGAGCCACGCCGCGTGCGTGAAGAAGG

CTTTCGGATCGTAAAGCTCTGTTGTTGGTGAAGAAGGATAGAGGTAGT

>4879 len=108 tot-seq=1



TTTCAGCCATGCTATCTCAGTTATTGCTTGCCTAGGGCAGAGTTCGCAGGGAGCCGAAG  
CAAATAAAATCCCAGTGCTTTGAGAATGGGAGGCATTCAGAGGCAAC

>4880 len=108 tot-seq=1

AAAGAAGGGTTTCGGCTCGTAAAGCTCTGTTGTTGGTGAAGAAGGACAGGGGTAGTAACT  
GACCTTTGTTTAAACAAAATCAATTAGAAAGTCACGGCTAACTACGTG

>4881 len=108 tot-seq=1

TAGGGAATCTTCGGCAATGGACGCAAGTCTGATGGAGCAACGCCGCGTGAGTGAAGAAGG  
ATTCGGATCGTAAAGCTCTGTTGTAGGAGAAGAAGGAGAGTGAGAGT

>4882 len=108 tot-seq=1

TGGGGAATATTGCGCAATGGGAGCAACCTGACGCAGCGACGCCGCGTGCGGGATGAAGG  
CCTTCGGGTCGTAAACCGCTTTTGATTGGGAGCAAGGCTTCGGGTGAG

>4883 len=108 tot-seq=1

TAGGGAATCTTCCACAATGGGCGCAAGTCTGATGGAGCAACGCCGCGTGAGTGAAGAAGG  
GTTTCGGCTCGTAAAGCTCTGTTGTTGGTGAAGAAGGAACGGGGTATT

>4884 len=108 tot-seq=1

TGGGGAATATTGCACAATGGACGGAAGTCTGATGCAGCGACGCCGCGTGGAGGGAGAAGG  
CCTTCGGGTTGTGAACCTTTTTCTCGTGAAAAAGGCATGCTTTTGG

>4885 len=108 tot-seq=1

CCTGATGGAGCAATGCCGCGTGCAGAATGAAGGCCCTCGGGTCGTAACTGCTTTTATGA  
GAGAAGAATATGACAGTAACTAATGAATAAGGGACGGCTAACTACGTG

>4886 len=108 tot-seq=1

CTCCTCTCAAGCTCACTCTCTAGGTCTCCAGGGTAGGAGTGTCTTTCTAGCAAGAATCTT  
AGTCAGGAGTAAGCTCTGTGCGAGAGACCTGTGAATAACCAGATAACC

>4887 len=108 tot-seq=1

GATGTGGATGGTGTGGCTGCTCTTTGTGCATTCACAGTGGCAGCCTGCCGAGCAGCCCAG  
CCAACAGTGCCTGTCTTTGCTCTTTGTTGTTTCGTACCATGTGGTG

>4888 len=108 tot-seq=1

TGGGGAATATTGCACAATGGGCGCAAGCCTGATGCAGCCATGCCGCGTGTGTGAAGAAGG  
CTTCGGGATGTAAAGCACTTCAGCGGGGAGGAAGGCGATAAGGTTA

>4889 len=108 tot-seq=1

TAGGGAATCTTCGGCAATGGACGGAAGCCTGACCGAGCAACGCCGCGTGAGTGAAGAAGG  
ATTCGGATCGTAAAGCTCTGTTGTAAGGGAAGAACAAGTGTGAGAGT

>4890 len=108 tot-seq=1

AAGAAGGTGTTTCGGATCATAAAGCTCTGTTGTAAGAGAAGAACGAGTGTGAGAGCGGAAA  
GTTACAATGTGACGGTATCTTACCAGAAAGGGACGGCTAACTACGTG

>4891 len=108 tot-seq=1

AAGAAGGTGTTTCGGATCGTAAAGCTCTGTTGTAAGAGAAGAACGAGTGTGAGAGTGGAAA  
GTTCTACTGTGACGGTACCTTACGAGAAAGGGACGGCTAACTACGTG

>4892 len=108 tot-seq=1

GAAGAAGGGTTTCGGCTCGTAAAGCTCTGTTGTAAGTGAAGAAGGGCAGGGGTAGTA  
GGCCTTTGTTGACGGTAATCAATTAGAAAGGCACGGCTAACTACGTG

>4893 len=108 tot-seq=1

GAAGAAGGCCTTCGGGTTGTAAGCCCTTTTGTGGGAAAGAAAAGCAATCGATTAATAC  
TCGGTTGTTATGACGGTACCCAAAGAATAAGCACCGGCTAACTGCGTG

>4894 len=108 tot-seq=1

GATCGCTTGAGTCCAAGAGTTTGAGATCAGCCTAAGCAACACAGGGAGACACCATCTCTA  
CAAAAATTTTTTAAAATGGCTGGGCATGGTAGTGTGCATCTATAGTC

>4895 len=108 tot-seq=1

TAGGGAATCTTCCACAATGGACGCAAGTCTGATGGAGCAACGCCGCGTGAGTGAAGAAGG  
GTTTCGGCTCGTAAAGCTCTGTTGTTGGTGAAGAAGGACAACTACGTG

>4896 len=108 tot-seq=1

CCTGATGGAGCAACGCCGCGTGCAGGAAGACGTCCTTCGGGTTGTAACTTCTTTTATAA  
GCGAGAAATATGATGGTAACTTATGAATAAGGCCCTGCTAACTACGTG

>4897 len=108 tot-seq=1

CCTGATGCAGCGACGCCGCGTGAGCGAAGAAGGATTTTCGGTTTGTAAAGCTCTATCATT  
GGGAAGAAAATGACGGTACCTTACAAAGAAGCGCCGGCTAAATACGTG

>4898 len=108 tot-seq=1

TAGGGAATCTTCCACAATGGACGCAAGTCTGATGGAGCAACGCCGCGTGAGTGAAGAAGG

TTTTCGGATCGTAAAGTTCTGTCGTCGGGGAAGAAGGATAGAGGTAGT

>4899 len=108 tot-seq=1

AGCCCAGGACAAGGTGAAAAGCAAAGAAATGTCTGCAGGACATAGCGTCCCGGGCTTGCC

TAGAACTGCGCCCTCCGCAACGTTTCTAAACCACTCTCCGCCCGTTTC

>4900 len=108 tot-seq=1

TGCAGGATGACGGCCCGATGGGTTGTAAACTGCTTTTATATGGGGATAAAGGGGGGAACG

TATGCCCTTTTGCAGGTACCATATGAATAAGGACCGGCTAATTCCGTG

>4901 len=108 tot-seq=1

TGGAGCTTTCATTTAAATGCCTTGTCTCCTTGTGGCGCAGGAAGGTTGGATTTTCAAGAA

CTTCCATCTCTGTCCCCTGTCTGTTACTGGAGAGCAGTATGTAGTG

>4902 len=108 tot-seq=1

TAGGGAATATTCCGCAATGGGGGCAACCCTGACGCAGCGACGCCGCGTGAGGGATGAAGG

GCTTCGGGTTGTAATCCGCTTTTGATTGGGAGCAAGCTTTCGGGTGAG

>4903 len=108 tot-seq=1

CAGCCAAGGGTAGGCACGGATGCCTCAGTCAGCCCTTTGTGTCTTGAAGCACGGGCAACT

GGCTGGGCAACTTCTCAGGGCTTCTCTATCAGCAATCTGGGCTGGA

>4904 len=108 tot-seq=1

GAAGAAGGTCTTCGGATTGTAAAGCACTTTAAGTTGGGAGGAAGGGTATTAACCTAATAC

GTTAGTACTTTGACGTTACCGACAGAATAAGCACCGGCTAACTCTGTG

>4905 len=108 tot-seq=1

CCCAGAATCAGATCCCGAATCCCCTTCTCTCTGGTACAGCCACCATCATCTCTTTCCTGG

AGGACAACAGCCTCCTCCCTGGTCTCCATGCTTCCACCCAAGCCCCTG

>4906 len=108 tot-seq=1

CCTGGTAAGAAGAGGAGAGGACACAGCTGCACACTTGGGAAGGAGGCCGCGGGACGACAG

AGGCAGAAGTTGCAGCGATGTCTCTGAACCGAGGGGCACCAAGGATTG

>4907 len=108 tot-seq=1

AGTGGGGTAGGACACACGTGGCTGTGAAGTGGTCTGCTCTTCCTTAGGGTTTCATTGTTT

CCTGGAGAGCTCTGACCCTGTGCAGAAGGGAATCAGAGCTCAATAAGG

>4908 len=108 tot-seq=1

AGCCCTAGGATCCCACCCGACAGGAAGTGCAGAACACACCCAGGGAGATGTCTCAATAGC  
TGAGTGCAGATTTCAAAAGTACAGTGC AACACAGCAGAAGTCACAA

>4909 len=108 tot-seq=1

TGATGTGATTGTCCTCGTGGGCACATACATCTCTGCAAATAGCCCATTCTCTTAACCACT  
GTGGTATTGTGTAATGAAGACATAGAAGAGTGAAAAGCTGTGTGCCTT

>4910 len=108 tot-seq=1

TAGGGAATCTTCGGCAATGGGGGCAACCCTGACCGAGCAATGCCGCGTGAGTGAAGAAGG  
TTTTCGGATTGTAAAGCTCTGTTGTATGAGAGGAACGTGTGTGAGTGT

>4911 len=108 tot-seq=1

CCTGATGCAGCGACGCCGCGTGAGCGAAGAAGGCTTTCGAGACGTAAAGCTCTGTCCTAT  
GGGAAGATAATGACGGTACCATAGGAAGAAGCCCTGGCTAAATACGTG

>4912 len=109 tot-seq=1

TGGGGGATATTGCACAATGGGGGAAACCCTGATGCAGCGACGCCGCGTGTTGGGAAGAAGG  
TCCTCCGGATTGTAAACCCTGTCCCCAGGGACGAAGATGAAGGTACCT

>4913 len=109 tot-seq=1

GGCACTAAGCATGTGGACAAGTAGTGTGTGCAGATAATGCACACACTCGCAGACACATTT  
AAAGCAACAACTGCCACCTTGCCCTCCACATCCGGGGGCAATCACCTC

>4914 len=109 tot-seq=1

CCGTAAATGGAAGTCCAAGGATCTAGCAGTTGTTTCAGTCCCACAAGGAAAGCAGGCAAAG  
GAGAGAAAGAGTGTTAATCTTCCTTCTTCAAAGTACTCACATAGGTCT

>4915 len=109 tot-seq=1

GCCTGATCCAGCCATGCCGCGTGAGTGATGAAGGCCCTAGGATTGTAAAGCTCTTTCGCC  
GATGAAGATAATGACGGTAACCGGAGAAGAAGCCCCGGCTAACTGCGTG

>4916 len=109 tot-seq=1

GAACGCTGGGGCCAGAGAGCCAGGGAGCCCGTGACAAAGGCCACAGAGGTGAAGCCAAG  
GGAAGACAGGACGAAACTAGGACTGCAGACATTGAGAGGAAGTCAGACC

>4917 len=109 tot-seq=1

TGACGTATTTGCAAAGTGGAAATATCAGCAGAGGTGAGAAACCCTTTTAGAAAAGAAATC  
TGAGAGGTAAAATATAAGAAATGGAAATGGAAAACTCCCAAGGAGAAT

>4918 len=109 tot-seq=1

TGGGGGATCTCCGCAATGGACGAAAGTCTGACGGAGCAACGCCGCGTGAGTGATGACGG  
CCTTCGGATTGTAAAGCTCTGTTAATCGGGACGAATGGTCGGAGGGCAA

>4919 len=109 tot-seq=1

TGATCCAGCAATTCTGTGTGCACGATGAAGTTCTTCGGAAGGTAAAGTGCTTTCAGTTGG  
GAAGAAGAAAGTGACGGTACCAACAGAGGAAGTGACGGCTAAATACGTG

>4920 len=109 tot-seq=1

CCCTGATCCAGCAATGCCGCGTGAGTGATGAAGGCCTTCGGGTTGTAAAGCTCTTTCGGC  
GGGAAGATGATGACGGTACCCGCGAGAAGAAGCCCCGGCTAACTTCGTG

>4921 len=109 tot-seq=1

GAGTGAAGAAGGGTTTCGGCTCGTAAACTCTGTTGTTGAAGAAGGATAGAGGTAGTAAC  
TGGCCTTTATTTGACGGTAATCAACCAGAAAGTCACGGCTAACTACGTG

>4922 len=109 tot-seq=1

TGGGAATCTCCGCAATGGACGAAAGTCTGATGGAGCAACGCCGCGTGAGGGATGACGG  
TTTTCGGATTGTAAAGCTCTGTTAATCGGGACGAATGGTTTGTGTGCAA

>4923 len=109 tot-seq=1

TAGGAATCTTCGGCAATGGACGCAAGTCTGATGGAGCAACGCCGCGTGAGTGAAGAAGG  
GTTTCGGATCGTAAAGCTCTGTTGTTGGAGAAGAACGTTGGTAGGAGTG

>4924 len=109 tot-seq=1

CCCTGACGCAGCGACGCCGCGTGAGTGGTGAAGTATTCGGTATGTAAAGCTCTATCAGC  
AGGAAGATAATGACGGTACCTGACTAAGAAGCACCGGCTAAATACGTG

>4925 len=109 tot-seq=1

GCAGGAGGCGGGAGAGGAGATGGCATTGGCATGCAGGTGGACGGACTCCTGTCGCCTGTC  
CTGCATGGCCAGCAGCGCACGAGGAAGGAGGAAACAAAAGCCTGAGGCT

>4926 len=109 tot-seq=1

TGAAGAAGGCCTTCGGGTTGTAAAGTCTTTCAGCGGGGAGGAAGGGAGTAAAGGTAATA  
TCTTTGCTCATTGACGTTACCCGCGAGAAGAAGCACCGGCTAACTCCGTG

>4927 len=109 tot-seq=1

GCCATTGGGTGGGTCTGTGGGGTCGGCCATTGTGAGCCACTAGCCTGACTTGGTTGTTTC

CTGGTAACCAGGTGACATAGGAGGCTTTGTGGGTACTAGCCATTGGGCA

>4928 len=109 tot-seq=1

CTCTGATGCAGCGACGCCGCGTGAGCGAAGAAGGAATTCGTTTCGTAAAGCTCTGTCCTG

GGGAAGGTAATGACGGTACCCCAGGAGGAAGCCCCGGCTAACTACGTG

>4929 len=109 tot-seq=1

CTCTGATGCAGCGACGCCGCGTGAACGAAGAAGGTCTTCGGATTGTAAAGTTCTGTCCTG

GGTGAAGATAATGACGGTACCTGCAGAAGAAGCCCCGGCTAACTACGTG

>4930 len=109 tot-seq=1

CTGACGGAGCAACGCCGCGTGAGTGATGAAGGTTTTTCGGATCGTAAACTCTGTTGTTAG

GGAAGAACAAGTGCCATAGTAACTGATGGCACCTTGACGGTACCTAACC

>4931 len=109 tot-seq=1

TGAAGAAGGTTTTTCGGCGCGTAAAGCTCTGTTGTTGGTGAAGGAGGACAGGGGTAGTAAC

TGACCTTTGTTTGACGGTAATCAATTAGAAAGGCACGGCTAACGACGTG

>4932 len=109 tot-seq=1

CCCTGATGCAGCGACGCCGCGTGAAGGAAGAAGTATCTCGGTATGTAACTTCTATCAGC

AGGGAAGATAATGACGGTACCTGACTAAGAAGCACCGGCTAAATACATG

>4933 len=109 tot-seq=1

TGGGAATCTCCGCAATGGGGGAAACCCTGATGCAGCGACGCCGCGTGCGGGATGAAGG

CTTCGGGTCGTAAACCGCTTTTGATTGGGAGCAAGCCTTTTGGGAGAG

>4934 len=109 tot-seq=1

TAGGAATCTCCACAATGGACGCAACCCTGACGGAGCAACGCCGCGTGCGTGAAGAAGG

CCTTCGGATCGTAAACCTCTGTTGATGGTGAAGAAGGATAGAGGTAGTA

>4935 len=109 tot-seq=1

GTAGGAGACGCCGGGATTCATCCAGCTCTGTCACTGCCGTGAACGCTGGCCCCATCTCC

GCGGGCTCTTCTCTCTGGAGCTTCTGCTCAGAATACTGCCAAGGG

>4936 len=109 tot-seq=1

TAGGAATCTTCGGCAATGGACGGAAGCCTGACCCAGCAACGCCGCGTGAGTGAAGAAGG

CTTCGGATTGTAAAGCTCTGTTGTTAGAGAAGAACGTTGGTAGAAGTG

>4937 len=109 tot-seq=1

CCCTGATGCAGCGACGCCGCGTGGGGGATGACGGCCTTCGGGTTGTAAACCTCTTTCAGT  
AGGGAAGAAGCCTCTTCGGGGGTGACGGTACCTGCAGAAGAAGTACCGG

>4938 len=109 tot-seq=1

CCCTGATGCAGCGACGCCGCGTGAGCGAAGAAGTATTTAGGTATGTAAAGATATATAAGA  
AGGGAAGATAATGACGGTACCTGACTAAGAAGCTCCGGCTAAATACGTG

>4939 len=109 tot-seq=1

GGGCGCAAGCCTGATGCAGCAACGCCGCGTGAACGATGAAGGTCTTCGGATCGTAAAGTT  
CTGTTGCAGGGGAAGATAATGACGGTACCCAAGGAGGAAGCCACGGCTA

>4940 len=109 tot-seq=1

TAGGGAGTGGGTGCATATCTGGGCATTTGCCAGGTGCCGGGAGAGGAAAACGGAAACCT  
GCTCCTATTCCTCTACAGCTGTTGACGTCAGCCGGTGACATAACCCGGC

>4941 len=109 tot-seq=1

TGAGGAATATTGCTCAATGGACGAGAGTCTGAACCAGCCAAGCCGCGTGAAGGATGACTG  
CCCTATGGGTTGTAAACTTCTTTTATACGGGAATAAAGTTAGCCACGTG

>4942 len=109 tot-seq=1

CAGCAGCTTGACATGCTCATCCTTTGATCCCCCTAGTTGTTTGCATAGGTGCTCCTGGTA  
GCTGGTGTGATGGGTGATCCACAGGTTCTCAGACAATGTGCTGGGGTC

>4943 len=109 tot-seq=1

GGCCTTCTGGGCACAGAGCGTGGGCACTAGGGTCCGAACTGTCTCTGGGCCTAGGAGACG  
ACATTCCACCCCATCCTGCACAAGATGACAAGCTCCCTGCTTCATGTTG

>4944 len=109 tot-seq=1

CCCTAATCCAGCAACGCCGCGTGAGTGAAGAAGGTTTTCGGATTGTAAACCTCTGTCCTT  
GGTGACGATAATGACGGTAGCCAAGGAGGAAGCCACGGCTAACTACGTG

>4945 len=109 tot-seq=1

TAGGGAATCTCCGCAATGGGCGAAAGCCTGACGCAGCAACGCCGCGTGAGTGAAGAAGG  
TCTTCGGATCGTAAACTCTGTTATTAGGGAAGAACATATGTATGAGTA

>4946 len=109 tot-seq=1

GAAGAAGGTGTTTCGGATCGTAAAGTTAGGTTGTAAGAGAAGAACGAGTGTGAGAGTGGAA  
AGTTCACAATTTGACGGTATCTTACCAGAAAGGGACGGCTAGCTACGTG

>4947 len=109 tot-seq=1

TGAGGAATATTTACAATGGGCGAAAGCCTGATGCAGCAATACCACGTGAACGATGAAGG  
TCTTCTGATTGTAAAGTTCTTTATTTAGGAAGAAAAGCGTGCTAGCAA

>4948 len=109 tot-seq=1

GCAAGCCTGATGCAGCCATGCCGCGTGTATGAAGAAGGCCTTAGGGTTGTAAAGTACTTT  
CAGCGGGGAGGAAGGTGATAAGGTTAATACCCTTATCAATTGATGTTTT

>4949 len=109 tot-seq=1

AGAAAAGGGAATGCTTCTGCACTGTTAGTGGGAATGTAAATTAGTTCAGTCACTGTGGAA  
AGCAGCTTGGAGATTTCTCAAGGAACTAAAAATAGTACTACCATTTGAC

>4950 len=109 tot-seq=1

CCTTAGCATCCTGCTTAACGGTCTTAGCAGCATCTGGTGGAGCAACAACAGCGTTCTTAA  
AAGTAACCTCTGGGTGATCCTTCTTGAAGGCTTTCTCCATAGCCTGAAT

>4951 len=109 tot-seq=1

GATCCAAGTCAAAACTTCTGCTTCTCTGGAAATCTCTGCCATCCACCCTCTCCCTGCT  
GTCTCTTGCTGTCTCTGGTCCCATCACCTTTGTCTGAAGGCCTCTCC

>4952 len=109 tot-seq=1

TGAAGAAGGCCTTCGGGTTGTAAAGCTTTTCGGCCGGAACGAAATCGCACGGGCCAATA  
CCTTGTGTGGATGACGGTACCGGAAGAAGAAGCACCGGCTAACTACGTG

>4953 len=109 tot-seq=1

TCATGGAGTTGGCTAGTACTGAATCCTGGAECTCAGTATCTACCAATAACGAGGGCCTC  
ACCTGGTGTAAGAGGCTCAGCCAGTGCCCTTTGTACTTCAGCTTTTCTC

>4954 len=109 tot-seq=1

CCTCCAGGCAGCAGAACATGCCATGAGTGCAGGGGCTGCAGGGCGGGGACCTGGCAGGT  
GGTACAAGTGAGGGGATCCTGGTCTCAGCCTGTGCATAAGCAGCTCCCT

>4955 len=109 tot-seq=1

CCCTGATGCAGCTACGCCGCTGAGCGTAGAAGGCTTTTCGAGTCGTAAAGCTCTGTCCTA  
TGAGAAGATAATGACGGTAGCATAGGAAGAAGCCCTGGCTAAATACGTG

>4956 len=109 tot-seq=1

CCCTGACGCAGCAGCGCCGCTGAAGGAAGAAGGCCTTCGGGTTGTAACTTCTTTAAGT



GTGGAAGATAATGACGGTACACACAGAATAAGCCACGGCTAACTACGTG

>4957 len=109 tot-seq=1

TGACCCAGCAATTCTGTGTGTGGAAGAAGGTTTTAGGACTGTAAATCTCTGTAGTAGG

GAAGAAAAAATGACGGTACCTACAGAAGAAGCACCCGGCTAAATACATG

>4958 len=109 tot-seq=1

GTCTTCACTCCCTCTCCATCTTTCTGCATTCTCTGAGGCCTTTCTGTCCCTGAACATCTA

GGTTCAACAGCCTAGCCCTCAGAGGAACCATCGGACAATGATGTCCT

>4959 len=109 tot-seq=1

GAGAAGGGAAAGCCCCGAAGATGCCATTATGCAGAGCCCTGGCCTCCACCTCCCAGCAAG

AGCTGGACCCAGCCTGCAAGCATGGCCGGCATGATTTCTGACGAAGCTC

>4960 len=109 tot-seq=1

TGAGGAATATTGGTCAATGGACGAGAGTCTGAACCAGCCAAGTAGCGTGCAGGATGACGG

CCTTCTGGGTTGTAACTCCTTTTGTGGGGATAATCGACATTACGTG

>4961 len=109 tot-seq=1

CAAGCAGAAGACGGCATAACGAGATAGTTGGGTGACTGGAGAAGAACACGTGCTAGGTAAC

TACTAGCGCCTTGACGGTATCTAACCAGAAAGTCACGGCTAACTACGTG

>4962 len=109 tot-seq=1

GAACCAGCCAAGTAGCGTGAAGGATGCAGGCTCTATAGGTCGTAACTTCTTTTATATAA

GAATAAAGTGCAGTATGTATACTTTTTGTATGTATTATGTGAATAAGG

>4963 len=109 tot-seq=1

CCCTGATGCAGCAACGCCGCGTGAGTGAAGAAGTATTCGGTATGTAAAGCTCTATCAGC

AGGAAAGAAAATGACTGTACCTGACGAAGAAGCCCCGGCTAACTACGTG

>4964 len=109 tot-seq=1

CCCTGGTGCAGCGACGCCGCGTGAGCGAAGAAGTATTCGGTATGTAAAGCTATAGCGGC

AGGGAAGAAAATGACGGTACCTGACTAAGAAGCCCCGGCTAACTACGTG

>4965 len=109 tot-seq=1

GAAGAAGGTTTTCGGATCGTAAAGCGCTGTTGTAAGAGAAGAACGTGGGTGAGAGTGGA

AGTTCACACAGTGACGGTAACTGACTACAGAAAGGGACGGCGAACTACGTG

>4966 len=109 tot-seq=1

TGGGGAATATTGCACAATGGGGGAAACCCTGATGCAGCGACGCCGCGTGAGTGAAGAAGC  
ATTCGGTATGTAAAGAACTATCAGCAGGGCAGAAGAAATGACGGTACC

>4967 len=109 tot-seq=1

CCCTGATGCAGCGACGCCGCGTGAGCGATGAAGTATTCGGTATGTAAAGCTCTATCAGC  
GGGGAAGAGAATGACGGTACCTGACTAAGAAGCCCCGGCTAACTACGTG

>4968 len=110 tot-seq=1

CAGCCCCGAGTGGATCAGAAGCTCAAGAGCTCTTCTCCGATACTTATCCTTCACCTATTG  
GGATCTTCAGATCCATAAGAGTCTTTGTATATTCCTTTTGAGCCAAATG

>4969 len=110 tot-seq=1

AATTTCTCAAATTAACACATTGGCTGTAAAAGTCCCATTTACAGCTATGCCTCAACCA  
CTGTTTCAAAGGAGGAACTTGGCATGCTAGGAAGAAATGCAGATCGTGC

>4970 len=110 tot-seq=1

TGGGGAATATTGCACAATGGGCGCAACCCTGATGCAGCGACGCCGCGTGATGAAGAAGG  
CTTTCGGGTTGTAAAGTACTTTAGCGGGGAGGAAGGGAGTAAAGTTAAT

>4971 len=110 tot-seq=1

GGGTCAGCTTGTTAGGGTTTTATGCATCTTCAGTGAAAAATTACATAAGAGTCTTTATCA  
GGGAAGGGCCAGGGTATAACACCATCTTACCTACAAGTTCTCAGCATTTG

>4972 len=110 tot-seq=1

CGTGTGTTTGAAGATTTGAGCATAGAGATAGTGAAGACAGGGCAGAGGACACAGGTGC  
ATGCATGGAAGAACTGGATCAAGCACAGATACTTTGCCTTAACCGTTAGC

>4973 len=110 tot-seq=1

GTGCGCCACCGTGGGGACTGTGACGGGGCAGGCTCAGTGAGAAAAATGACAGATGGCTAG  
ATGGGTTGATCTAGGGATTACTAAATCAGCAAGCTCTCCTTCTCCAGCCC

>4974 len=110 tot-seq=1

CCCTGACGCAGCAACGCCGCGTGAAGGGTGAAGGTTTTCGGATTGTAACTTCTTTTATT  
AAGGGCGAACTTGACGGTACTTAATGAATAAGCTCCGGCTAACTACGTG

>4975 len=110 tot-seq=1

CGTGAGGGACGACTGCCCTATGGGTTGTAAACCTCTTTTGTGGGAATAAAGTGCGCCA  
CGTGTGGCGCATTGCATGTACCATTTGAATAAGGACCGGCTAATTCCGTG

>4976 len=110 tot-seq=1

GTGAAGAAGGGTTTCGGCTCGTAAAGCTCTGTTGTTGGGGAAGAAGGGCAGGGGTAGTAA  
CGGACCTTTGTTTGACGGTAATCAATTAGAAAAGTAACGGCTAACTACGTG

>4977 len=110 tot-seq=1

TGGGGAATATTGCGCAATGGGCGAAACCCTGACGCAGCGACGCCGCGTGCGGGAAGAAGG  
CCTTCGGGCTGTAAACCGCTTTTGATTGGGAGCAAGGCTTTTGGGTGAGT

>4978 len=110 tot-seq=1

ATGAAGAAGGCCTTCGGGTTATAAAGTACTTTCAGCGGGGAGGAAGGGAGTAAAGGTAAG  
ACCTTTGCTGATTGACGTTACCCGCAGAAGAAGCACCCGGCTAACTCCGTG

>4979 len=110 tot-seq=1

GTGAAGAAGGTTTTCGGATCGTAAAGCCCTGTTGTTGGAGAAGAAGGTGAGTGAGAGTAA  
CTGGTCACGTTTCGACGGTAACTAACCAGAAAGCCACGGCTAACTACGTG

>4980 len=110 tot-seq=1

TAGGGAATATTGCACAATGGAGGAAACTCTGATGCAGCCACGCCGCGTGTGTGAAGAAGG  
CCTTCGGGTTGTAAAGCACTTTTGGTGGGAGGAAAAAATGAGGTTACAC

>4981 len=110 tot-seq=1

AACGATGAAGGTCTGCTGAGTGTAAGTTCTTTTATTTAGGAAAAAAGCGAGCTAGGAA  
ATGAGTGCGACTTGAGGGTACTAATTGAATAAGTGACAGCTAACTATGTG

>4982 len=110 tot-seq=1

ATGAAGAAGGCCTTCGGGTTGTAAAGTACTTTCAGCGGGGAAGAAGGGAGTAAAGTTAAA  
CCCTTTGCTCATTGACGTTACCCGAAGAAGAAGCACCCGGCTAACTCCGTG

>4983 len=110 tot-seq=1

GTGAAGAAGGTTTTCGGATCGTAAAGGTCGGTTGTTGGTGAAGAAGGATAGAGGTAGTAA  
CTGGTCTTTATTTGACGGTAATCAACCAGAAAGTCCCGGCTAACTACGTG

>4984 len=110 tot-seq=1

TAGGGAATCTCCACAATGGACGCAACCCTGACGGAGCAACGCCGCGTGAGTGAAGAAGG  
TTTTCGGATCGTAAAGCTCTGTTGTTGGTGAAGAAGGATTGTGGTAGTAA

>4985 len=110 tot-seq=1

ATATGACATTGAACAGATATGTCTGGGGGCTTCAAATCCTCCTTGGGCCTCCACTCTCTT

TGAAATAGATGAATTTGTAAAGATCTATGACTTGCCAGGGGAAGATGACA

>4986 len=110 tot-seq=1

GTGAAGAAGGTCTTCGGACCGTAAAACCTGTTGTTAGAGAAGAAAGTGAGTGGGAGTAA

CTGTTACGTTTTGACGGTATCTAACCAGAAAGCCACGGCTAACTACGTG

>4987 len=110 tot-seq=1

TAGGGAATCTCCACAATGGACGCAAGTCTGATGGAGCAACGCCCGTGAGTGAAGAAGG

GCTTCGGCTCGTAAAGCTCTGTTATTTGTGAAGAAAGACAGGGGTAGTAA

>4988 len=110 tot-seq=1

GTGAAGAAGGGTTTCGGCTCGTAAAGCTCTGTTGTTAGAGAAGAAGGACAGGGAGAGTAA

CTGATCTTTGTTGACGGTAATCAATTAGAAAGTCACGGCTAACTACGTG

>4989 len=110 tot-seq=1

TGGAGAATATTGCACAATGGACGCAAGCCTGACGCAGCAACGCCCGTGAGGGGTGAAGG

TCTTCGGATCGTAAAGCTCTGTTGGTGGTGAGGAAGGATAGAGGTAGTAA

>4990 len=110 tot-seq=1

CTCCTAGAAAGGCAGCCCCTGCTGGAAGCATGCGACACCCTGCGCCGGGGCCTGACTGCC

CACGGCATCAACATCAAGGTGAGTGCCGCACCAAGGTCAGGGACATCACC

>4991 len=110 tot-seq=1

TAGGGAATCTTCGGCAATGGACGGAAGTCTGACCGAGCAACGCCCGTCAGGGGTAGTAA

CTGACCTTTGTTGACGGTAATCAATTAGAAAGTCACGGCTAACTACGTG

>4992 len=110 tot-seq=1

TGAGGAATATTGGTCAATGGGCGAGAGCCTGAACCAGCCAAGTCGCGTGCAGGACGACGG

CCCTATGGGTTGTAAACTGCTTTTATGTGGGATAAAGTCTGCGACGTGT

>4993 len=110 tot-seq=1

CCCTGACGCAGCAACGCCCGTGAATGAAGAAGCCCTTCGGGGTGAAAAGTTCTGTCAAT

GGGGACGAAACTTGACGGTACCCATAGAGGAAGCACCGGCTAACTCCGTG

>4994 len=110 tot-seq=1

CGTTCAGGAAGACGGCTCTACGAGTCGTAAACTGCTTTTGTACTAGGGTCAGCCTATCTA

CGTGTAGATAGCTGAAAGTATAGTACGAATAAGGATCGGCTAACTCCGTG

>4995 len=110 tot-seq=1

GTGTGTGTGAAGAAGGTTTTAGGACTGTAACTGCTTTTATGCGGGGATAAAGTCGCCCA  
CGTGTGGGTGTTTGCAGGTGCCGCATGAATAAGGACCGGCTAATCCGTG

>4996 len=110 tot-seq=1

TAGGGAATCTTCGGTAATGGACGGAAGTCTGATCGAGCAACGCCGCGTGAGTGAAGAAGG  
ATTCGGATCGTAAAGCTCTGTTGGTAGAGAAGAACGTTGGTAGGAGTGG

>4997 len=110 tot-seq=1

GGGATAAGGATGGAGAGAGGCTGAGGCCAAACGGTCCAGGTTTGTGGACTGCACATAGCC  
ATGGGAGAGAGCGAACTGCGTGGGCACCATGACCCAGGCAGCAATGTAAA

>4998 len=110 tot-seq=1

GTGAAGAAGGGTTTCGGCTCGTAAAGCTCTGTTGTTTGTGAAGAAGGTCAGGGTTAGTAA  
CTTACCTTTGTTTGACGGTAACCAATTAGAAAGTCACGGCTAACTACGTG

>4999 len=110 tot-seq=1

GTGAAGAAGGGTTTCGGCTCGTAAACTCTGTTGTTTGTGAAGAAGAACAGGGGTAGTAA  
CTGGTCTTTGTTTGACGGTAACCAATTAGAAAGTCACGGCTAACTACGTG

>5000 len=110 tot-seq=1

CCACGTCCGGGAAGTGAGGAGCGTCTCCGCCCGCAGTCGCCCGTCCGAGAAGTGAGGA  
GCCCTCCGCCCGCAGCCGCCCGTCCGGGAAGTGAGGAGCGTCTCCGC

>5001 len=110 tot-seq=1

GGTAAAAATTGATGACCAGCATCTAGCACAAGACAACCTAGACAATTCCCAATTATCCACA  
TAGATAGGAAATGTGCCTGAAGACTGAATCACTTATATCAGCAGTAAAAG

>5002 len=110 tot-seq=1

GTGATGAAGGGTTTCGGCTCGTAAACTGTTGTAAGAGAAGAATGACATTGATAGTAA  
CTGGTCAATATATGACGGTAACTTACCAGAAAGTAACGGCTAAATACGTG

>5003 len=110 tot-seq=1

TGAAGACGGCCTTCGGGTTGTAAAGCTCTGTGGTTCGAGACGAAAGATGAGCAGACGAAT  
AATCTGCATAAGTGACGGTACCGAAAAAGCAAGCCACGGCTAACTACGTG

>5004 len=110 tot-seq=1

CTGATCCAGCAATTCGGTGTGTGTGAAGGAGGTTTTAGGACTGTAAAACACTTATAGTAA  
GGAAGAAAAAATGACGGTACCTACAGAGGAAGCAACGGCTAAATACGTG

>5005 len=110 tot-seq=1

CTGACCCAGCAACGCTGTGTGAGTGATGAAGGTTTTCGGGTTGTAAAACCTTTGAGCAG  
GGAAGAAAAAAGTGACGGTACCTGTAGAACAAGCCACGGCTAAATACGTG

>5006 len=110 tot-seq=1

TGGGGAATCTTCCACAATGGGCGCAAGTCTGATGCAGCGACGCCGCGTGAGGGAAGGAGG  
CCTTCGGCTCGTAAACCTCTTTTGTAGGGAGCAAGGACTTTTGTGTTGA

>5007 len=110 tot-seq=1

GTGAAGAAGGCTTTTCGGGTTGTAAAGCACTTTCAGTGGGGAAGAAGGCCTGCGGGTTAAT  
AGCCGCGCAGGGACGACATCACCCACAGAAGAAGCACCGGCTAACTCCGTG

>5008 len=110 tot-seq=1

TGGGGAATATTGGACAATGGAGGCAACTCTGATCCAGCAATTCTGTGTGTGTGAAGAAGG  
TTTTAGGACTGTAAAAGGTACCTACAGAAGAAGCGACGGCTAAATACGTG

>5009 len=110 tot-seq=1

AGCTTGAAAGAAGGTCTGATACCAGAGGCCTGGGGTGGGTCAGATGCCCTGTGGCCTGT  
TCATTTGCTATTATTATTGACATTGCAACCTGTTCCCTTTTCTCTCCCTC

>5010 len=110 tot-seq=1

CCCTGATCCAGCGACGCCGCGTGAGTGAAGAAGTATTTTCGGTATCTAAAGCTCTATCAGC  
AGGGAAGAAAGCAGACGGTACCTGACTAAGAAGCCCCGGCTAACTACGTG

>5011 len=110 tot-seq=1

AGCCTGATGCAGCGACGCCGCGTGAGCGAAGAAGTATGTCGGTATGTAAAGCTATATTAG  
AAGGGAAGAAAATGACGGTACCTTACGAAGAAGCTCCGGCTAAATACGTG

>5012 len=110 tot-seq=1

GTGAAGAAGGGTTTCGGCTCGTAAAGCTCTGTTGTTGGTGAAGAAGGACAGGGGTAGTAA  
CTTGCCCTTTGTTTGACTGTAATCAATGAGAAAGTCACGGCTAACTACGTG

>5013 len=110 tot-seq=1

CTGATGCAGCGACGCCGCGTGAGCGAAGAAGTAGTTCGGTATGTAAAGCTCTATGAGTAG  
GTAAGAAAAAATGACGGTACCTGACTAAGAAGCCCCGGCTAACTACGTG

>5014 len=110 tot-seq=1

GTGAGGGAAGACGGTCTATGGATTGTAAACCTCTTTTGTGCGGGGAGCAATGGTCGTGAC

GAGTGAAGACTGTGAGAGTACCCGAAGAAAAAGCATCGGCTAACTCCGTG

>5015 len=110 tot-seq=1

GTGAAGAAGGGTTTCGGCTCGTAAAGCTCTGTTGTTGTTGAAGAATGTAAGGGGGAGTAA

CTGACCTTTGTTTGACGGTAATCAATTAGAAAAGTCACGGCTAACTACGTG

>5016 len=110 tot-seq=1

TTCTCTGCCTTGCTCCATTGTGGCTTGGGGATGTATGAATGAAGGAGGCCACGCGAAGCT

GCTGACGAAGGGATCTGGGGAGCCCGGCATCCCACACCCACAGTTACC

>5017 len=110 tot-seq=1

GTGAAGAAGGGTTTCGGCTCTTAAAGCTCTGTTGGTAGTGAAGAAAGATAGAGGGAGTAA

CTGGCCCTGATTTGACGGTAATTACTTAGAAAAGTCACGGCTAACTACGTG

>5018 len=111 tot-seq=1

TGGGAATATTGCACAATGGGGGAAACCCTGATGCAGCGACGCCGCGTGAGCGAAGAAGT

ATTTCCGGTACGTAAAGCTCTATCAGCAGGGAAGAAGATGAAGGGACCTGAC

>5019 len=111 tot-seq=1

GCGTGAGGGATGAAGGTACAGAGTAGCGTAAACCTCTTTTGGCAGGGAACAAAGGCGGGG

ACGCGTCCCCGGATGAGTGTACCTGAAGAAAAAGCATCGGCTAACTCCGTG

>5020 len=111 tot-seq=1

TGGGAATTTTGGACAATGGGGGCAACCCTGATCCAGCAATGCCGCGTGTGTGAAGAAGG

CTTTCGGGTTGTAAAGCACTTTTGTCCGGAAAGAACACGCCGTTGGCTAATA

>5021 len=111 tot-seq=1

AACCCTGATGCAGCGACGCCGCGTGAGCGGTGAAGTATTTCCGGTATGTAAAGCTCTATCA

GCAGGGAAGAAAATGACGGTACCTGACTAAGAAGCCCCGGATAACTACGTG

>5022 len=111 tot-seq=1

TGTGAAGAAGGCCTTCGAGTTGTAAAGCACTTTCAGCGGGGAGAAAGGCGTTAAGGTTAA

TAACCTTGGCGATTGACGTTACCCGCAGAAGAAGCACCGGCTAACTCCGTG

>5023 len=111 tot-seq=1

TAGGAATCTTCGGCAATGGACGGAAGTCTGACCGAGCAACGCCGCGTGAGTGAAGAAGG

TTTTCGGTTTCGTAAAGCTCTGTCGTTGGAGAAGAACGTTGGAAGGAGTGGA

>5024 len=111 tot-seq=1

CCGTCAGTATAAGTAAGATCGTTCAATAACGCATAGCCAACACCAATCCGGCAGATCCG  
TTACCAGCTCCGTTACCAGATCCGTTACCGAATCCGCCGGCACCAGCCTCG

>5025 len=111 tot-seq=1

TGGGGAATCTTCCACAATGGACGCAAGCCTGATGCAGCAACGCCGCGTGAGTGAAGAAGG  
TCTTCGGATCGTAAACCTCTGTTGTTAGAGAAGAACACGAGTGAGAGTAAC

>5026 len=111 tot-seq=1

TTTTTTTTCAAGCAGAAGACGGCATAACGAGATGATCTGGTGAAGTTCAGACGTGTG  
CTCTCCGATCTCCTACGGGAGACAGCAGCATTCTTCTCATTTCATATG

>5027 len=111 tot-seq=1

TTTTTTTTTTCAAGCAGAAGACGGCATAACGAGATATTGGCGTGAAGTTCGACGTGT  
GCTCTCCGATGGCAGCAGTGAAACTCTCCAGGAGCTCTAGAGCAAGA

>5028 len=111 tot-seq=1

TCCTTGAACAATGTTTTGAAGGCAGAGAAATGGTTCTCTGGATCTGGGCAGCACACAGCT  
AACGCTGCTCTACATGTGTAGGTGAGAAAGACTCAGGCCTCGCAGCCTGAA

>5029 len=111 tot-seq=1

TGGGGAATCTTCGACAATGGACGCAACTCTGATGGAGCAACTCCGCGTGTGTGAAGAAGG  
TTTTAGGACTGTAAACACTTTTAGTAGGGAAGAAAGAAATGACGGTACCT

>5030 len=111 tot-seq=1

AGTGAAGAAGGTTTTAGGATAGTAAAGATATGTTGGGGGGGAAGAAGGAGAGAGGGAGGA  
AAGGGAATTTATTTGACGGTAATCAACCAGAAAGTCACGGCTAACTACATG

>5031 len=111 tot-seq=1

AGTGAAGAAGGTTTTCGGCTAGTAAAGCTCTGTTGTGTGTGAAGAAGGATAGGGGTAGTA  
ACTGACCTTTGTTTACGGTAATAAATTAGAAAGTCACGGCTAACTACGTG

>5032 len=111 tot-seq=1

AGTGAAGAAGGTGTGCGGATCGTAAAGCTCTGTTGTTGGTGAAGAAGGATAGAGGGAGTA  
ACTGGCCTTTAGTTGACGGTAATCAACCAGAAAGTCACGGCTAACTACGTG

>5033 len=111 tot-seq=1

TAGGGAATCTTCCACAATGGGCGCAAGTCTGATGGAGCAACGCCGCGTGAGTGAAGAAGG  
TTTTCGGCTCGTAAAGCTCTGTTGTTGGTGAAGAAAGAGAGGGGTAGTAAC



>5034 len=111 tot-seq=1

AGTGAAGAAGGGTTTCGGCTCGTAAAGCTCTTTTGTGGTGAAGAAGGACAGGTTTAGTA  
ACTGACCTTTGTTTGACGGTAATCAATTAGAAAAGTCACGGCTAACTACGTG

>5035 len=111 tot-seq=1

TAGGGAATCTTCCACAATGGACGCAAGCCTGATGGAGCAACGCCGCGTGAGTGAAGACGG  
GCTTCGACTCGTAAAGCTCTGTTGTTGGTGAAGAAGGACAGGGGTAGTAAC

>5036 len=111 tot-seq=1

TAGGGAATCTTCGGCAATGGACGCAAGTCTGACCGAGCAACGCCGCGTGAGTGATGAAGG  
CTTCGGATCGTAAAGCTCTGTTGTTAGAGAAGAACGTTGGTTGGAGTGGA

>5037 len=111 tot-seq=1

TGGGGAATATTGCACAATGGGCGCAAGCCTGATGCAGCGACGCCGCGTGAGGGATGACGG  
CCTTCGGGTTGTAAACCTCTGTTAGCAGGGAAGAAGAGAACTTGACGTGAC

>5038 len=111 tot-seq=1

TAGGGAATCTTCGGCAATGGACGCAAGTCTGACCGAGCAACGCCGCGTGAGTGAAGAAGG  
CTTCGGATCGTAAAGCTCTGTTGTTAGAGAAGAACGATGGGAGGAGTGGA

>5039 len=111 tot-seq=1

TAGGGAATCTTCCACAATGGGCGCAAGCCTGATGCAGCAACGCCGCGTGAGTGATGAAGG  
CTTCGGATCGTAAAGCTCTGTTGATGGTGAAGAGGGCTAGAGGTAGTAAC

>5040 len=111 tot-seq=1

GAGGATCCCTTGAGCTGAAGACTTCGACACCAGCCTGGGCAACATAGTAAGACCCTATGT  
GTATAAAATATACAAACAGCTAGCCGGTATGGTGGCATGCAACTGTAGTC

>5041 len=111 tot-seq=1

TGGGGAATTTTGCACAATGGGGGAAACCCTGACCGAGCAACGCCGCGTGAAGGAAGAAGG  
TTTTCGGATTGTAAACTTCTGTTATAAAGGAAGAACGGCGGCTACAGGAAA

>5042 len=111 tot-seq=1

TTTTTTTTTCAAGCAGAAGACGGCATAACGAGATCGTACTGTGACTGGAGTTCAGACGTGG  
GCTCTCCGATCTCCTACGGGAGGAAGCAGTCTGAATGGGCAGCCAGTGAG

>5043 len=111 tot-seq=1

GGGGGGGGTGGATGATGGGTGTGGCTGGGCCAGGCCTGCAGGGCCTCACAGGGCAGTTTC

CTCTTCCCTTCCCTTGGGCCCTGGCCGTCTTCTGGCCTGGCATTCTTCCAC

>5044 len=111 tot-seq=1

GAACGAGGAAGGGCGGCGGAGGGTAAAGTTCTTTATTTAGGAAAAAAGCGTGCTAGGA

AATGAGCGCGCCTTGATGGTACTAATTGAATAAGTGACAGCTAACTATGTG

>5045 len=111 tot-seq=1

CAGATGAAAAGATAGAAAATATGAAATAAAGGCTAAGAATGTTGTGACTTACATTTACTT

ACAATATGGTTATAAGTAACTGAGGTGCTAATATCCAAACAATGAGATTC

>5046 len=111 tot-seq=1

GCTCTGAGGGATGTGACAGTGCTGTCATGGAGAGGGGACAGTGGACTAGGATGCCAGAGG

CCTGCAAGACCAGTGCTGGCTGACACCGGGACAGAGCTCACAGCAGCTTCC

>5047 len=111 tot-seq=1

TCTGATCCAGCAATTCTGTGTGTGTGTAGAAAGTTTTAGGACTGTAAAGCGCTTTTAGTA

GGAAAGAAAAAATGACGGTACCTACAGAAGAAGCAACGGCTAAATACGTG

>5048 len=111 tot-seq=1

TGGGGAATATTGGACAATGGAGGAAACCCTGATGCAGCAATGCCGCGTGTGTGAAGAAGG

CTTTAGGACTGTAAACACTTTTAGTAGGGAAGAAAAATTTGGCTTTACTT

>5049 len=111 tot-seq=1

AAGCCTGATGCAGCGACGCCTCGTGAGCGAAGAAGTATTCGGTATGTAAAGCTCTATAA

GAAGGGAAGAAAATGACGGTACCTTTCTAATAAGCTCCGGCTAAATACGTG

>5050 len=111 tot-seq=1

TGCGCTTGTGGGCCAGCTGCAGTTCGGGGTAGGCACGGGCTTGGCAGGCCCTGCACTCGG

AGCAGCCTGCCGGCCCTGCCGCCCAAGCTGTGAGGGGCTTAGCATCTTCG

>5051 len=111 tot-seq=1

GAGCGATGAAGGTCTTCTGATTGTAAAGTTCTTTATTTAGGAAAAAAGCGTGTTAGGA

AAGGAGCGCGCCTTGATGGTACTAATTGAATAAGGGACAGCTAACTATGTG

>5052 len=111 tot-seq=1

CTCTGATACAGCAATTCGGTGTGTGAGAAGAAGTTTTAGGACGGTAAAACACTTTTAGT

AGGGAAGAAAAAATGACGGTACCTACAGAAGAAGCAACGGCTAAATACGT

>5053 len=111 tot-seq=1

CACGATGAAGGTCTTCGGACTGTAAAGTGCTGTTATAAGGGAAGAACATTTGCAATAGGA  
AATGATTGCAGAATGACAGTACCTTGTTCAGAAAGCGAGGGCTAACTATGTG

>5054 len=111 tot-seq=1

GCGCGCAAATTACCCACTCCCGACCCGGGGAGGTAGTGACGAAAATAACAATACAGGAC  
TCTTTCGAGGCCCTGTAATTGGAATGGATCCATTGGAGGGCAAGTCTGGTG

>5055 len=111 tot-seq=1

GTTCCATCTTACAGGCAGACAAGGAAGTGAGGATAACAGTGACTTGTCCAGGTTACACAG  
CTCTGTACCGCCCCTGCCAAGCTGATTTGGCAGTTGGAGGCTCACTAGGAT

>5056 len=111 tot-seq=1

GCGTGCAGGATGACGGCCCTATTGGTTGTAAGTCTTTTGTGTTGGAATAATCGACATT  
ACGTGTAATGTTTTTCATCTACCATTCTAATAAGAACCGGCTAATTCCGTG

>5057 len=111 tot-seq=1

CGCGTGAGGGACGACGGTGCTACGGATTGTAAGTCTTTAGGCGGGGAGTAATGTGCTA  
TACGAGTAGAGTAGTGAGAGTACCCGCAGAATAAGCATCGGCTAACTCCGT

>5058 len=111 tot-seq=1

TACTAACCACTGTGCCACCGTTCTGCCAATCCAATCTCCAACCTGTCCCTATAGTCCTG  
CAAGTTTAACTTCCCTCAATCTTTGTTGGGAAACAATGATCTTCTCCACTT

>5059 len=111 tot-seq=1

CACGATGAAGGTCTTCGGATTGGAAGTGCTGTTATAATGGAAGAACATTTGCAAGAGGA  
AAGGATTTCACTGACGGTACCTTGTTCAGAAAGCGATGGCTAACTATGTG

>5060 len=111 tot-seq=1

ACGCAGAGACGCCGCGTGCGGGATGAAGGCCTTAGGGTTGTAAGCGCTTTTGATTGGGA  
GCAAGCATTCCGGTGAGTGTACCTTTCGAATAAGCGCCGGCTAACTACGTG

>5061 len=112 tot-seq=1

AAGTCAAAGCAGGCGGATGAGCGCCTGTCACAGCAGACTTCTATGAAGAATGCAGAAAAC  
TCCATGACTCAAAGCTAATAGTAAGAAATGGAACAAAGAATATAAAAAGAA

>5062 len=112 tot-seq=1

AGCAGGGCTGTGGCCTGCAGAGAGAGGAGCTGATAAGAAAGACAAGGCCACAGCAAGAGT  
CTAAAAGTGGGTTCTACTTAACTCAGGTACCCAGCAAGTCTCCTCTGTCC

>5063 len=112 tot-seq=1

TCAAGCAGAAGACGGCATAACGAGATCGTGATGTGACTAGAGTTCAGACGTGTGCTCTTCC  
GATCTCCTACAGGAGGCAGCAGACGTGTGCTCTTCCGATCTCCTACGGGAGG

>5064 len=112 tot-seq=1

TAGGGAATATTGCACAATGGAGGAACTCTGATGCAGCCACGCCGCGTGTGTGAAGAAGG  
CCTTCGGGTTGTAAAGCTCTTTTGGTGGGAGGAAAGAAATGGCGTTACCCT

>5065 len=112 tot-seq=1

CGCGTGCAGGATGACGGTCCTATGGATTGTAACTGCTTTTGTACGGGAAGAACTCC  
CTCGTGAGGGAGCTTGACGGTACCGTAAGAATAAGGATCGGCTAACTCCGTG

>5066 len=112 tot-seq=1

TAGGGAATCTTCCACAATGGACGAAAGTCTGATGGAGCAACGCCGCGTGAGTGAAGAAGG  
TTTTCGGATCGTAAAGCTCTGTTGTTGGTGAAGAAGGGTTTTCGGCTCGTAAA

>5067 len=112 tot-seq=1

TAGGGAATATTCCACAGTGGACGCAAGCCTGATGGAGCAACGCCGCGTGAGTGATGAAGG  
TTTTCGGATCGTAAAGCTCTGTTGTTGGTGAAGAAGGTTAGAGGTCGTAAC

>5068 len=112 tot-seq=1

TAGGGAATCTTCCACAATGGACGCAAGTCTGATGCAGCAACGCCGCGTGAGTGATGAAGG  
CTTTCGGATTGTAAAGCTCTGTTGTTGGTGAAGAAGGCTAGAGGTAGTAAC

>5069 len=112 tot-seq=1

TAGGGAATCTTCCGCAATGGACGAAAGCCTGATGGAGCGACGCCGCGTGAGTGAAGAAGG  
TTTTCGGATCGTAAAGCTCTGTTGTTGGTGAAGAAGGATAGGGGAAGTAAC

>5070 len=112 tot-seq=1

TAAGGAATCTTCCACAATGGACGAAAGTCTGATGGAGCAACGCCGCGTGAGTGAAGAAGG  
TTTTCGGATCGTAAAGCTCTGTTGTTGGTGAAGAAGGCTAGTGGTAGTATCT

>5071 len=112 tot-seq=1

TAGGGAATATTCCACAATGGACGCAAGCCTGATGGAGCAACGCCGCGTGAGCGATGAAGG  
TTTTCGGAACGTAAAGCTCTGTCGTCGGTGAAGAAGGATAGAGGTAGTAAC

>5072 len=112 tot-seq=1

TAGGGAATCTTCCACAATGGACGCAAGTCTGATGGAGCAACGCCGCTGAGCGAAGAAGG

CTTTCGGATCGTAAAGCTCCGTTGTTGGTGAAGAAGGATAGAGGTAGTAACT

>5073 len=112 tot-seq=1

GAGTGAAGAAGGGTTTCGGCTCGTAAAGCTCTGTTGGTAGTGAAGAAAGACAGAGGTAGT

AGCTGACCTTTGTTTGACGGTAATTAATTAGAAAAGTCACGGCTAACTACGGG

>5074 len=112 tot-seq=1

TGAGTGAAGAAGGGTTTCGGCTCGTAAAGCTCTGTTGTTGGTGAAGAAGGACAGGGGTAC

TAACTGACCTTTGTTTGACCTTAATCAATTAGAAAATTCACGGCTAACTACGT

>5075 len=112 tot-seq=1

TAGGGAATCTCCACAATGGACGAAAGTTTGATGGAGCAACGCCGCGTGAGGGAAGAAGG

TTTTCGGATCGTAAAGCTCTGTTGTTGGTGAGGAAGGATAGAGGTAGTAACT

>5076 len=112 tot-seq=1

TGGGGAATCTCCACAATGGACGCAAGTCTGATGCAGCAACGCCGCGTGAGGGAAGAAGG

CTTTCGGATCGTAAAGCTCTGTTGTTGGTGAGGAAGGATAGAGGTAGTAACT

>5077 len=112 tot-seq=1

TAGGGAATCTCCACAATGGATGCGACTCTGATGGAGCAACGCCGCGTGAGTGACGAAGG

TTTTCGGATCGTAAAGCTCTGTTGTTGGTGAAGAAGGATAGTGGCAGTAACT

>5078 len=112 tot-seq=1

CTCACTGGAAAGTGGGCTTCTAGGGAGGCTGTCAGTATCTTTGCAGCCACTTAGCTCTGG

TTCTTAGAGTCCTTAATCGCCGGCTCCTCCATGACATGAGGCCTAATGAGG

>5079 len=112 tot-seq=1

TAGGGAATCTCCACAATGGACGAAAGCCTGATGGAGCAACGCCGCGTGAGTGAAGAAGG

GTTTCGGCTCGTAAAGCTCTGTTGGCAGTGAAGAAAGATAGAGGAAGTAACT

>5080 len=112 tot-seq=1

GAACCTGATGCAGCGACGCCGCGTGGGTGAAGGAGCACCTCGGTGCGTAAAGCCCTGTC

GCGAGGGAAGAAAATGACGGTACCTGGAGAAGAAGCCCCGGCTAACTACGTG

>5081 len=112 tot-seq=1

AAACCTGATGCAGCAACGCCGCGTGAATGATGAAGGTTTTCGGATCGTAAAGCTCTGTC

TGTGGGGAAGATAATGACGGTACCCGAGGAAGAAGCCACGGCTAACTACGTG

>5082 len=112 tot-seq=1

GACAAGGGAGGCAGCGGGAGGAATGCAGTGGCCAGGCAGGTGAGGGACCTCAGGACCAGC

AGCTCAGCCGCATCCTTGCATGCAGTGGCCAGGCAGGTGAGGGACCTCAGGA

>5083 len=112 tot-seq=1

CCTAGCAGGTGCCTTGGGAACTGAATACGCAGCACCTTCCATTATTCATCCCAAGCCC

AGGATCCACTAGCCGGGAGCTCAGCCGGGAAAGGGATCCCCAAGCGGGCCAC

>5084 len=112 tot-seq=1

ACACTGGATCTCCTGGCTGGGGAGCAGGGCCCAGAGGGGAGGGGGCCGCGCAGGCCTGCC

CTCACCACCCACACACAGCAGCCTCCCCAGGAGGTCAAGTGCCTTGGAGAG

>5085 len=112 tot-seq=1

ATTTAAGAGTTTGGGGAGGAATGCTATTAGCCACCACCCTGAAGAATCAAGGACAAATGA

GAATGGACTTGGCAGGGGCTTCAGGGGATTTGGACGAAGCCAGGGGTGGACT

>5086 len=112 tot-seq=1

AAAGCCTGATGCAGCGACGCCGCGTGAGCTAAGAAGTATTTCTGTATGTAAAGCTCTATC

AGAATGTAAGAAAATGACGGTACCTTACTAAGAAGCTCCGGCTAAATACGTG

>5087 len=112 tot-seq=1

GTTTCACTCAAGGTGCGGTCTTGGGTGCGGATAAACAGCCGCAGTTCACCAGGCTCCACA

CTGTCGCTGGTTCGGGTACCAATCGAACAGAATGCGATAGCCCTTGATGTTGT

>5088 len=112 tot-seq=1

CAAGTCTGATGGAGCAACGCCGCGTGAGTGATGACGGTCTTCGGATTGTAAAGCTCTGTC

TTTAGGGACGATAATGACGGTACCTAAGGAGGAAGCCACGGCTAACTACGTG

>5089 len=112 tot-seq=1

CTCTGATCCAGCAATTCTGTGTGTGGGAAGAAGTTTTAGGACGGTAAAACACTTGTAGT

AGGGAAGAAAGAAATGACGGTACCTACAGAAGAAGCGACGGCTAAAGACGTG

>5090 len=112 tot-seq=1

AGCGTGAAGGATGACGGCGCTATGGGTTGTAACTGCTTTTATATGGGAATAATCGGCAT

TACGTGTAATGTTTTGCATGTACCATACGAATAAGGACCGGCTAATCCGTG

>5091 len=112 tot-seq=1

GAGTGAAGAAGTTTTGCGGATCGGAAAGCTCTGTTGCTGGTGAAGAAGGATAGAGGTAGT

AACTGGCCGGTATTTGACGGTAATCAACCAGAAAGTCACGGCTAACTACGTG

>5092 len=112 tot-seq=1

GCCTGACCCAGCAACGCCGCGTGAAGTATGAAGGTCTTCGGGTTGTAACTGCTTTGAGC  
AGGGAATAAACAAATGACGGTACCTGAAACACAAGCCACGGCTAACTACGTG

>5093 len=112 tot-seq=1

AAAGCCTGATGCAGCGACGCCGCGTGAGCGAAGAAGTATTTTCGATATGTAAAGCTCTATC  
AGAAGGGAATGAAATGACGGTACCTTACTAAGAAGCTCCGGCTAAATACGTG

>5094 len=112 tot-seq=1

GACGCAGCGACGCCGCGTGCGGGATGAAGGCCTGCGGGTTGTAGACCGCTTGTGATTGGG  
AGCAAGCCGTCGGGTGAGTGTACCTTTTGAATAAGCGCCGGCTAACTACGTG

>5095 len=112 tot-seq=1

CGCGTGAGGGAGGAAGGTACAGAGTATCGTAAACCGCTTTTGTTCAGGGAACAAAGACTGG  
GACGCGTCCCCGGATGGGTGTACCTGAAGAAAAGCATCGGCTAACTCCGTG

>5096 len=112 tot-seq=1

CCCTGATGCAGCGACGCCGCGTGAGTGAAGAAGTAATTCGTTACGTAAAGCTCTATCAGA  
AGGAAAGAAAAAATGACGGTACCTGATTAAGAAGCCCCGGCTAACTACGTG

>5097 len=112 tot-seq=1

CGCCAGTCCACCGGGCTCATGCCGGTGACGCGGCGGAATCCCGGTTGAAGTTGGACTTG  
GTCTGGAAACCCGAGGAAAACATGATCGCCGTTACCGATTGCTCCGTCTCTT

>5098 len=112 tot-seq=1

AGTGAAGAATGTTTTTCGGATCGTAAAGCTCTGTTGTAAGAGAAGAACGTGTGTGAGAGTT  
GAAAGTTCACACAGTGACGGTATCTTACCAGAATGGGACGGCTAACTACGTG

>5099 len=113 tot-seq=1

GACGGGAGGCAGCAGGAGAGAAAAAGGGGGCCTGGGGAGCGCTGAAAGGGGAGATGCAG  
AGAGAGGGGCTCGTAAAAAAGAAAGGAGCGGGAAGGATCATATTGGTCCTGC

>5100 len=113 tot-seq=1

CAACAGGAGCAGAAGGAACAGGAGCAGCAGGAGGAACAGTGGTAACAACAGCAGCAGCAG  
CAACCAGAGCAGCAGCAGGAGCAGCAGCAACAGGAGCAGCAGGTCCAGCAGGT

>5101 len=113 tot-seq=1

TAGCGTGAAGGATGACTGCCCTATGGGTTGTAACTTCTTTTATACGGGAATAAAGTTAG

CCGCGTGTGGCTTTTTGTATGTACCGTATGAATAAGGATCGGCTAACTCCGTG

>5102 len=113 tot-seq=1

GCAAGCCTGATGCAGCCATGCCGCGTGTAGGAAGAAGTATCTCGGTATGTAACTTCTAT

CAGCAGGGAAGATAATGACGGTACCTGACTAAGAAGCCCCGGCTAACTACGTG

>5103 len=113 tot-seq=1

GCGTGAGGGATGGAGGCCTTCGGGTTGTGAACCTTTTCGCCAGTGAAGCAGGCCTGCCT

CGTTTGTGGGTGGGTTGACGGTAGCTGGATAAGAAGCGCCGGCTAACTACGTG

>5104 len=113 tot-seq=1

TGAGTGAAGAAGGGTTTCGGAGCGGAAAGCTCGGTGGGGGGTGAAGAAGGACAGGGGTAG

TAACGGACATTTGTTTGACGGGAATCAATTAGAAAGGCACGGCTAACTACGTG

>5105 len=113 tot-seq=1

TGAGTGAAGAAGGGTTTCGGCTCGTAAAGCTCTGTTGTTGGTGAAGAAGGACAGGGGTAC

TAACTGACCTTTGTTTCGACGGTAATCGATTA AAAAGTCACGGCTAACTGCGTG

>5106 len=113 tot-seq=1

GAAGAGGGCCAGTGAGAGAATGTTCCATGAACCTCCAAGCCTGTCAAGGCAAGGGACAC

ATTTTGGCCATTTGAGCCCCTCTCGTGGGATGGATTCAGAATGAACTGGACTG

>5107 len=113 tot-seq=1

TAGGGAATCTCCACAATGGACGCAAGTCTGATGGAGCGATACCGCGTGAGTGAAGAAGG

GTTTCGGCTCGTAAAGCTCTGTTGTTGAAGAAGAACGTGCGTGAGAGCAACTG

>5108 len=113 tot-seq=1

TGAGTGAAGAAGGGTTTCGGCTCGTAAAGCTCTGTTGCTGGAGAAGAACGTA ACTGAGAG

TAACTGTT CAGTGAGTGACGGTATCCAACCAGAAAGTCACGGCTAACTACGTG

>5109 len=113 tot-seq=1

TAGGGAATATTGCACAATGGAGGAAACTCTGATGCAGCCATGCCGCGTGTGTGAAGAAGG

CCTTCGGGTTGTAAAGCACTTCGGCGGGGAGGAAAAAATGAGGTTAACCTCA

>5110 len=113 tot-seq=1

GACAGCACAGTGGCCCATCTGCCTCTTGCTCTTCACCAGGATGCCTGGTGTGTCC

CTCCATGGCCAGGCTTTACAGAACGCAGTCCCACCTGGAGCAGCCACTCGGAC

>5111 len=113 tot-seq=1



GAGTGAAGAAGGTTTTCGGATCGTAAAGCTCTGTTGTAAGAGAAGAACGAGTGTGAGAGT  
GGAAAGTTCACACTGTGACGGTACCGGAAAAGCAAGCCACGGCTAACTACGTG

>5112 len=113 tot-seq=1

TGAGTGAAGAAGGGTTTTCGGCTCGTAAAGCTCTGTTGTTAAAGAAGAACGTGGGTAAGAG  
TAACTGATTGCACAGTGACGGTAGTTAACCAGAAAGCCACGGCTAACTACGTG

>5113 len=113 tot-seq=1

ATCTCTACGGGAGCCAGTAGCCGCGGTAATGGATAGATCGGAAGAGCGTCGTGTAGGGA  
AAGAGTTGCCAATGTGTAGATCTCGGTGGTCGCCGTATCATTAAAAAAAAAAAA

>5114 len=113 tot-seq=1

TGAGTGAAGAAGGGTTTTCGGCTCGTAAAGCGCTGTTGTTGGTGAAGAAGGACAGGGGTAT  
TAACTGACCTTTGTTTGACGGTAAGCAATTAGAAAAGTCACGGCTAACTACGGG

>5115 len=113 tot-seq=1

TGAGTGAAGGAGGTTTTCGGCTCGTAAAGCTCTGTTGCTGGTGAAGAAGGATAGAGGTAG  
TAACTGGCCTTTATTTGACGGTAATTATCCAGAAAAGTCACGGCTAACTACGTG

>5116 len=113 tot-seq=1

TAGGGAATCTTCCACAATGGACGCAAGCCTGATGGAGCAACGCCGCGTGAGGGAAGAAGG  
GCTTCGGCTCGTAAACTCTGTTGTTGGGAAGAAGGACAGGGGTAGGGACTG

>5117 len=113 tot-seq=1

CAGGAGGATCACTTGAGGTCAGGAGTTCGAAACCAGCCTGGGCAACATGGCAAAACTCTG  
TCTCTACTAAAAATACAAAATTAGCTGGGCACGGTGGTACATGCCTGTAGTC

>5118 len=113 tot-seq=1

TGAGTGAAGAAGGGTTTTCGGCTCGTAAAGCTCTGTTGTTGGCGAAGAAGGAAAGGGGTAG  
TAAATGAACTTTGTTTGAGGGTAATCAATTAGAAAAGTCACGGCTAACTACGTG

>5119 len=113 tot-seq=1

TGAGTGAAGAAGGTTTTCGGAGCTTAAATCTCTGTTGTTGGTGAAGAAGGATAGAGGTAG  
TAACTGGCCTTTATTTGACGGTAATCAACCAGAAAAGTCGCGGCTAACTACGTG

>5120 len=113 tot-seq=1

TAGGGAATCTTCCACAATGGACGCAAGTCTGATGGAGCAACGCCGCGTGAGTGAAGAAGG  
GTTTCGGCTCGTAAAGCTCTGTTGTTGGTGAAGAAGGACCGGCTAATCCGTG

>5121 len=113 tot-seq=1

GGAGGATGAAGGCCTTCGGGTCGTAAACTCCTGTTGATCGGGAAGAATGGGTTCTGGGTG  
AATAGCCCGGAGCAATGACGGTACCGATTGAGGAAGCCACGGCTAACTCTGTG

>5122 len=113 tot-seq=1

TGAGTGAAGAAGGGTTTCGGATCGTAAAGCTCTGTTGTTGGTGAAGAAGGATAGAGGTAT  
TACCTGGCCTTTATTTGACGGTAATCACCCAGAAAGTCACGGCTAACTACGTG

>5123 len=113 tot-seq=1

TGAGTAAAGAAGGGTTTCGGCTCGTAAAGCTCTGTTGGTAGTGAAGAAATATAGGGGTAG  
TAACTGGCATTATTTGACGGTAATTACTTAGAAAGTCACGGCTAACTACGTG

>5124 len=113 tot-seq=1

TAGGGAATTTTCGGCAATGGGGGAAACCCTGATGCAGCGACGCCCGTGGAGGAAGAAGG  
CCTTAGGATTGTAAACTCCTATTGTTGAGGAAGATAATGACGGTACTCAACAA

>5125 len=113 tot-seq=1

CAATGATTTTCGAGCCTTCCTGCTGTGCGAAGCATCCGCCACTGCAATCATCATTCCGG  
GGCGGTTACGTTTCACATCTGCCAGCTGTCCCAAATGACCATAGAGTTTCGTA

>5126 len=113 tot-seq=1

GACAAAAGCAAGTGGGACTGCAGAGGGAAGGAGGATAAGCAGGGGAAAATCCCTGCAGGG  
AAGCAGCAGCTCCAACAGCAGGGAGCTTGCAAGTCGCACCTAGAACTGCTCT

>5127 len=113 tot-seq=1

AGTCCAGCCCCTGGGACCTCTGGAACCTGTTTCTCAGGTTCTATTCACAGTCATCTTTGG  
AAGGTATGGACAGTGAGAACTGCAGGGCAAGGGACCTTCTCATCCCTGATCC

>5128 len=113 tot-seq=1

ACAAACAGACAGGGACCCCCGCCCTTGAGGCACTGACCTTCTCACAGGACCCAAGTGAGG  
CAGAAAACCATGAGCCATGACCAGGAAGACGTAAGATGGTGCCCGTACCGCCA

>5129 len=113 tot-seq=1

GGGAAACCCTGATGCAGCGACGCCCGTGAACGAAGAAGGTATTCGTATCGTAAAGTTCT  
GTCCTATGGGAAGATAATGACAGTACCATACGAATAAGGACCGGCTAATTACG

>5130 len=113 tot-seq=1

TTCAAGCAGAAGACGGCATAACGAGATAAACTGTGACTGGAGTTCAGACTGTGCTCTTCC

GATCTCCTACGGGAGGCAGCGGGCAGATTGCATTTTGAGGCTCCAGACTTGC

>5131 len=113 tot-seq=1

TGACAGTAGTGGGATGAGTGGGTCTCAGGTCTCTGGGTGGTGTGCATGGCGTTCGTGAT

GGCAGTAGTGGTTGTGGGCCAATCCTCGGGCCCCCAAGTAGCAAACATGGGTG

>5132 len=113 tot-seq=1

AAGATGATTTGATACTCGATGACTAATTACTGGACTCCTAGGATCTCCCTGTCAAAGGCC

ATAATTGGCACAGAAATGGGAGATAAGATTGGACAGGCAGGTGTTAAGTGGTC

>5133 len=113 tot-seq=1

GGGAGGAAGAAGGCCGCGGGGGGGAAAGGACTTGCAGCGGGGAGGAAGGGAGTAAAGTT

AATACCTTTACTCATTGACGTTACCCGCAGAAGAAGCACCGGCTAACTCCGTG

>5134 len=113 tot-seq=1

CCCGGGGAGGTAGGGACGAAAAAGAACAAGACAGGCCTCTTTCGAGGCCCTGTAAGTGA

ATGAGTCCACTTTAAATCCTTTAACGATGATCCATTGGAGGGCAAGTCTGGTG

>5135 len=113 tot-seq=1

TGAGTGAAGAAGGTTTTCGAATCGTAAGGCTCTGTTGTTGGTGAAGAAGGATAGAGGTAG

TAACTGGCCTTTATTAGACGGTAATCAACCAGAAATTCACGGCAAACACTACGTG

>5136 len=113 tot-seq=1

TGAGTGAAGAGGGTTTTCTGATCGTAAAGCGCTGTTGTTGGTGAAGAAGGATAGAGGTAG

TAACTGGCCTTTATGTGACGGTAATCAACCAGAAAGTCACGGCTAACTACGTG

>5137 len=113 tot-seq=1

CAGGCAGATTGCTTGAGCCCAGGAGTTTGAGACCAGCCTGGGCAATATAGCAAAACCTG

TCTCTACAAAAAATACAAAAATTAGCTGGGTGTGGTGGCATGCGCCTGTGGTC

>5138 len=113 tot-seq=1

GAAACCCGGACGCAGCAACGCCGCGTGCGGGATGAAGGCCTTCGGGTTGTAAACCGCTGT

AAGCAGGGAAGACAGCGACGGTACCTGCAGAAGAAGCCCCGGCCAACACTACGTG

>5139 len=113 tot-seq=1

GCAAGCCTGATGCAGCGACGCCGCGTGAGCGAAGAAGTATTTCCGGTATGTAAAGCTATAT

CAGCAGGGAAGAAAATGACGGTACCTGACTAAGAGGCTCCGGCTAAATACGTG

>5140 len=113 tot-seq=1



>5150 len=114 tot-seq=1

TGGGGAATATTGCGCAATGGGCGCAACTCTGATGCAGCGACGCCGCGTGAGGGATGAAGG  
CCTTCGGGTCGTAAACCGCTTTTGATTGGGAGCAAGCTTTCGGGTGAGTGTACC

>5151 len=114 tot-seq=1

TAGGGAATATTGCACAATGGAGGCAACTCTGATGCAGCAATGCCGCGTGTGTGAAGAAGG  
CCTTCGGGTTGTAAAGCACTTTCGGAGGGGAGGAAAAAATGGGGTTACCTCA

>5152 len=114 tot-seq=1

GTGAGTGAAGAAGGGTTTCGGCTCGTAAAGCTCTGTTGTTGGTGAAAAGGGACAGGGGGA  
GTAAGTACCTTTGTTTGACGGTAACCAATTAGAAAAGTCACGGCTAACTACGTG

>5153 len=114 tot-seq=1

TGAGGAATATTGGTCAATGGGCGTTAGCCTGAACCAGCCAAGTAGCGTGAAGGATGAAGG  
CTCTATGGGTCGTAAACTTCTTTTATATAAGAATAAGGACCGGCTAATTCCGTG

>5154 len=114 tot-seq=1

GCCGCGCAGGATGACGGTCCTATGGATTGTAAACTGCTTTTGTACAGGAAGAAACT  
GGTTCGTGAACCAGCTTGACGGTACTGTAAGAATAAGGATCGGCTAACTCCGTG

>5155 len=114 tot-seq=1

GTGAGTGAAGAAGGGTTTCGGCTCGTAAAGCTCTGTTGTTGGTGAAGAAAGACAGGGGTA  
GTAACGGACCTTTGTTTGACGGTAATCGATTAGAAAAGGCACGGCTAACGACGTG

>5156 len=114 tot-seq=1

TAGGGAATCTCCACAATGGACGCAAGTCTGATGGAGCAACGCCGCGTGAGTGAAGAAGG  
GTTTCGGCTCGTAAACTCTGTTGTTGGTGAAGAACGACATGGGGAGTAACTGA

>5157 len=114 tot-seq=1

GTGAGTGAAGAAGGTTTTTCGGATCGTAAAGCTCTGTGGTGGTGAAGAAGGATAGAGGTA  
GTAAGTGGCCTTTATTGGACGGTAATCAACCAGAAAGTCAGGGCTAACGACGTG

>5158 len=114 tot-seq=1

CCCGCGTGAAGGAATAAGGACCTATGGTTTGTAACCTTCTTTTCTACAGGGATAAACCC  
GGGACGTGTCCCGGGCTGAAGTACTGTAGGAATAAGCACCGGCTAACTCCGTG

>5159 len=114 tot-seq=1

GTGAGTGAAGAAGGGTTTCGGAGCGTAAAGCTCTGTTGTTGGTGAAGAAGGATAGAGGCA

GTAAGTACCTTTGTTTGACGGTAATCAACCAGAAAGTCACGGCTAACTACGTG

>5160 len=114 tot-seq=1

TAGGGAATCTCCGCAATGGACGGAAGTCTGACGGAGCAACGCCGCGTGAGTGAAGAAGG

TTTTCGGATCGTAAAGCTCTGTTGCTAGAGAAGAACGTTGGTGGGAGTGGATAA

>5161 len=114 tot-seq=1

GTGAGTGAAGAAGGGTTTCGGCTCGTAAAGCTCTGTTGTTGGTGAAGAAGGACAGGGGTG

GTGACTGACCGGTAAATGACGGTAATCAATTAGAAAGTCACGGCTAACTACGTG

>5162 len=114 tot-seq=1

TGACGCAGCGACGCCGCGTGCGGGAGGAAGGCCGTCGGGGTGTAACCGCTTTTGATTGG

GAGCAAGCCTGGGGGGGAGTGTACCGTTCAATAAGCGCCGGCTAACTACGTG

>5163 len=114 tot-seq=1

GTGAGTGAAGAAGGTTTTCGGATCGGAAAGCTCTGTTGTTGGTGAAGAAGGATAGAGGTA

GGAAATGGCATTATTTGACGGTAAGAAACAAGAAAGTCACGGCTAACTACGTG

>5164 len=114 tot-seq=1

CGCAAGCCTGATGCAGCAACGCCGCGTGAACGATGAAGGTCTTCGGATCGTAAAGTTCTG

TTGCAGGGGAAGATAATGACGGTACCCTGTGAGGAAGAAAAGGATAAATACGTG

>5165 len=114 tot-seq=1

TGGGGAATATTCGACAATGGAGGGAACTCTGATCCAGCAATTCGCGTGTGTGAAGAAGG

TTTTAGGATTGTAAACTCTTTAGTAGGGAAGAAAAAATGATGGTTCCTAAA

>5166 len=114 tot-seq=1

TGAGGTATGATCATGCTACTGCACTCCACCTTGGGTGACAGAGAAAGACCTTGTCTCTTA

AAACAAACACACAAAAATAATAAAGTTATTTCTCTGCTTGATAGACCAGACTCC

>5167 len=114 tot-seq=1

TAACAAATGTAGGGCCTCAATTGGAAAGGAAGGACTAGGGCCTTTAGAATAATGGTCAC

TGTCAGGACAATGAGGAGTATCTAGCCCAGAGACTAGCTATAGGTACACCCCAA

>5168 len=114 tot-seq=1

CCGCCATAAAATCCACTCTTTAGCGTGTGCGACAGAGTGGTCTTGAGTAGGGTCACAAGC

GTCACCGCTAGTTCAGAGCCTTTGCATCACCCACGGAAAGAAACCCTGGACCTT

>5169 len=114 tot-seq=1

GGAAACCCTGATGCAGCAACGCCGCGTGAGTGATGAAGGATTTCCGGATCGTAAAGCTCTA  
TCTTTAGGGAAGATAATGACGGTACCCGAGGAAGAAGCCACGGCTAACTACGTG

>5170 len=114 tot-seq=1

TGACGCAGCGACGCCGCGTGCGGGATGAAGGACTTCGGGTTGAAAACCGCTATTGATTGG  
GAGCAAGCCTTTTGGGTGAGTGTACCTTGCGAATAAGCGCCGGCTAACTACGTG

>5171 len=114 tot-seq=1

CGTGGACGATGAAGGTCTTCTGATTGTAAAGTTCTTTATTTAGGAAAAAAGCGTGCTA  
GGAAATGAGCGCGCCTTGAGGGTACTAAGTGAATAAGGGACAGCTAACTAGGTG

>5172 len=114 tot-seq=1

GGGACAAATGAGAAGGAGAGCAAGAGGGAGCACATCAATGAGAAACAATGATGATGAGAT  
AATTAGAGTGAGCAATAAAGAATTCATCACAGGGACAGAGGACCAGACCAATGA

>5173 len=114 tot-seq=1

AACTCTGATCCAGCAATTCGGTGTTTGTGAAGAAGGTTTTAGGACGGTAAACTCTTTTA  
GTAGGGAAGAAAGAAATGACGGTACCTACAGAAGAAGCGACGGCTAAATACGTG

>5174 len=114 tot-seq=1

TGGGGAATATTGCACAATGGGCGCCAGCCTGATGCAGCGACGCCGCGTGAGGGATGGAGG  
CCTTCGGGTTGTACACCTCTTTTATCGGGGAGCCCGCGGAGTGAGTTTACCCG

>5175 len=114 tot-seq=1

GGGTAGGAACATCTATATAACCCCTTCCCTTTCAGCACCGTCCCTGGGGTTCTCAGCTG  
GCGCCCCCTCCAGCCCCCTGGCAGTGTGAGTGTGAGGGGTGCTGGCTGTGCCCCACT

>5176 len=114 tot-seq=1

CCAAGGGAGGCTCATGTGGGGCCAGCCTCTGGGATGGGGGAGGATGGGCAAGATGTCCTA  
GGCTGTGCCTTTCTCAGTGGCTTTTACATCTGATTTCCCTGCTTCACAGAGAGG

>5177 len=114 tot-seq=1

GAAGGGTAAGTGCATAGAGTGAGAAGAGAGAGAGGTTGAGAAGTGGATAGTGGGAAAAGG  
GCATTTGAGGTTGGACAAAGGAAGAGGATGGAGAGAGAGAAAGAGAGTGGGGAA

>5178 len=114 tot-seq=1

GCCGCGTGACAGGAAGACGGCTCTATGAGTTGTAAACTGCTTTTGTACGAGGGTAAACTCA  
CATACGTGTAGGTGACTGGAAGTATCGTACGAATAAGGACCGGCTAACTCCGTG

>5179 len=114 tot-seq=1

TTGTCCAAACCCTTGTAAGTAAAAATGTCTGCAAGATATAATCCCTGTGTTTTTCATCAGA  
GGCTTCTAGGGCTCCTGGTGTGAATAAGAATCCTCCACGCAGTTTGTATTAC

>5180 len=114 tot-seq=1

GGTAGGGGTGGTAGGGGTGGAGGATAGGCAGGGGTGAGGTAGGGAAGAACATCAGCCAAC  
GGCCTCTTTCACAGGACTGCAGGAAGGAGTCCGGGACGTGGAGTGAGGAAGGG

>5181 len=114 tot-seq=1

GGTCAAAAACTTAAGAGATTTTAATACATTTCTGTAAGTCAACCCTGTGATAACAAGA  
AGATGGCCTTCAAGAATAGGCCTCAGCCAAAGGAGTATTGGTTGGCAATGACAG

>5182 len=114 tot-seq=1

AAGTCTGAGCCAGCAATTCTGTGTGCACGATGACGTGTTTCGGAATGTAAAGTGCTTTC  
GTTGGGAAGAAAAAATGACGGTACCAACAGAAGAAGGGACGGCTAAATACGTG

>5183 len=115 tot-seq=1

GCAGTGTGGGCAGAGGCCCCCATCCCTGGAGTCAGGCAGACACACCTGCCTTCCTCCAG  
GGCGAACCTCAGTACTCCAGCCATTCCAGCAGCAACACCCTCGCCAGCAACGCCT

>5184 len=115 tot-seq=1

AGGTTAATTCTGGGCATTTTGTATTCTCTCTCACTTCTCGGCTCTTTGAATCAGAGAGA  
CTATAATGTTAGACTACTCAGCCTTTGCTCCAAGAAAAGTCTTTTAACTACTT

>5185 len=115 tot-seq=1

TTTTTTTTCAAGCAGAAGACGGCATAACGAGATTGTGCCGTGACGGAGTTCAGACGTGTGC  
TCTCCGATCTCCTACGGGTGGCAGCAGTGGTAGATGGAAAGTAAGTGATCTGGG

>5186 len=115 tot-seq=1

AAACCCTGATCCAGCGACACCGCGTGAGTGAAGAAGTATTCGGTATGTAAAGCCCTATC  
AGCAGGGAAGAAAGAAATGACGGTACCTGAGTAAGAAGCCCCGGCTAACTACGTG

>5187 len=115 tot-seq=1

GTGAGTGAAGAAGTTTTTCGGAGCGGAAAGCTCTGTTGTTAAGGAAGAACGAGTGGGAGA  
ATGGAAAGTTCATGCTGTGAAGGGACTTAACCAGAAAGGGACGGCTAACTACGTG

>5188 len=115 tot-seq=1

TAGGGAATCTCCACAATGGACGAAAGCCTGATGGAGCAACGCCGCGTGAGTGAAGAAGG



CTTTCGGATCGTAAAGCTCTGTTGTTGGGGAAGAAGGTTACAGGTAGTAACTGGC

>5189 len=115 tot-seq=1

TGCCCGCTGAAGGACTAAGGCCCTATGGGCTGTAACTTCTTTAGACGCAGAGCAATAAG

GGCCACGCGTGGTCCGATGAGAGTATGCGTAGAATAAGCATCGGCTAACTCCGTG

>5190 len=115 tot-seq=1

AGAAGACGGCATAACGAGATGACTGAGTACTGGAGTTAGACGTGTGCTCTTCCGATCTCC

TACGGGAGGCAGCACGGTAGTGCATTTGTGGGCGGCTGGATTGGGGCCAGGGGAG

>5191 len=115 tot-seq=1

ATGAGTTTCATTACACAACCTGAGGAGAATGAGGCTCAGGAAATGGAATTAACCTGCTAGG

GGCCCTGCAGCTGGGATGAAGCCTTATTGCCATCTATTAGTCTGAGAAGGATCTC

>5192 len=115 tot-seq=1

CGTGAGTGAAGAAGGGTTTAGGATGGTAAAGATATGTTGGTAGTGAAGAAAGAGAGAGGT

AGTAAATGGAATTTATTTGACGGTAATTACTTAGAAAAGTCACGGCTAACTACATG

>5193 len=115 tot-seq=1

CGAAAGAACAGTCGCAGAGGGAAAGCGGGAAAGAGATGGGGGAAAGTGTGTGTGTGTGAG

TGTGTGCTTGTGTGCATGTGTGTGCGTGTGTGTGTCAAGGAAAAAAGCTCGCAGT

>5194 len=115 tot-seq=1

CTGACGCAGCGACCCGCGTGCGGGATGAAGGCCTTCGGGTTGTAAACCGCTATTGATTG

GGAGCAGGCCTTTTGGGTGAGTGTACCTTTCGAGCAAGCGCCGGCTAACTACGTG

>5195 len=115 tot-seq=1

GGCTCCCCGGGCAGTGCCTGGGCCTAGGAGGGCTCCCCTGGCCAGGTGCATCCAGGCAGA

GACTTGAACAGTGGAGAGGAGAGTTACGGCGTGGAGAGCAAGGAGCAGGGAGGGG

>5196 len=115 tot-seq=1

CGTGAGTGAAGAAGGTTTTCGGATCGTAAATCTCTATTGTAAGAAAAGAACAAATTGTAG

ATTAACCTGCTACAGTCTTGACGGTAGCTTACCAGAAAGCCACGGCTAACTACGTG

>5197 len=115 tot-seq=1

CGGGAGCGCGTGGCCAAAGCTGTCAGCAGAGGCACAGGTGGTGGCAGGCAGTAGAGGCCG

CCCATGGGGAACATACTGACCTGTCGTGTGCGCCCTAGCGTCAGCCTCGAGTTTG

>5198 len=115 tot-seq=1

TGGGGAATTTTACGCAATGGGGGAAACCCTGACGTAGCGACACCCGCGTGAGCGAAGAAGC  
CCTTTGGGGTGTAAGCTCTGTCAGCAGGAACGAACAAAATGACGGTACCTGCAG

>5199 len=115 tot-seq=1

AGTAGCGTGCAGGATGACGGCCCTATGGGTTGTAACTGCTTTTATATGGGAATAAAGTG  
AGGGGCGTGACCTTAATGCATGTACCACATGAATAAGGACCGGCTAATCCGTG

>5200 len=115 tot-seq=1

CCTAGACTTTTTAATAATGGCATTGAAAAAGTACAAGTCACAAAAGCAACTCGATGA  
TAGTAAAGAACAGAAACGCCGAATATGTAGGTGGAGCAAGTGGCGTCCCATCCCC

>5201 len=115 tot-seq=1

GAGTCTGAACCAGCCAAGTAGCGTGCAGGATGACGGCACTATGGGTTGTAACTGCTTTT  
GTTTGGGAATAATCGACATTACGTGTAATGTTTAGCATGTACCGTGCGAATAAGG

>5202 len=115 tot-seq=1

CGTGAGTGAAGAAGGTTTTCGGATCGTAAAGCTCTGTTGTTGTTGAAGAAGGATAGAGTT  
AGTAACTGGCCTTTATTTGACTGTAATCATCCAGAAAGTCACGGCTAACTACGTG

>5203 len=115 tot-seq=1

TAGGGAATTTTCGGCAATGGGGGCAACCCTGACCGAGCAACGCCGCGTGAAGGAGGAAGG  
TCTTCGGACTGTAACTTCTGTTATAATGGAAGAAAGACGGATAAAGGGAATGAT

>5204 len=115 tot-seq=1

CCCATTGCCAGAACTCAGCACCAAGGTCAGGTGCTGCCAGAGGCTCAAGAATGTGGTCT  
CTAGCTGAGTAGCCCTAGGCCACCTAAAAGGTGGCTGAATGGTCTTCGGGCCAG

>5205 len=115 tot-seq=1

ATCTCTACATTGCTGATGAGGGGAGAAAGGAACACAAAGCACAGATTATTTTTGGGAAT  
GTGACTGGAGTTATAACTACACATGAAAAGGCAAATAATGAGTTAATGAGAAAAA

>5206 len=115 tot-seq=1

CGTGAGTGAAGAAGGGTTTTCGGCTCGTAAAGCTCTGGTGGTAGTGAAGAAAGATAGAGGT  
AGTAACGGGCCTTTATTTGACGGTAACTACTTAGAAAGGCACGGCTAACTACGTG

>5207 len=115 tot-seq=1

CGTGAGTGAAGAAGGGTTTTCGGCTCGGAAAGCTCCGTTGGTAGTGAAGAAAGATAGAGGG  
AGTAACGGGCCTTTATTTGACGGTAATTACTTAGAAAGGCACGGCTAACTACGTG

>5208 len=116 tot-seq=1

AAGTCGCGTGAGGGATGACGGCCCTACGGGTTGTAAACCCGTTTGTAAAGGGAGCGAGGG  
GCGCCACGTGTGGCGCTGTGAGAGTACCTGAAGAAAAAGCATCGGCTAACTCCGTG

>5209 len=116 tot-seq=1

GGAGACCTGCTTGCAAGCAGATCAACCATAGCCAGACAGGTCCTGCTCCATGGCTCTGAC  
AGTGCCCAGGGAGCCCATGTAATTACTGCCGGAAGTACATCTGAGGCTGTCACCC

>5210 len=116 tot-seq=1

TGTTTTTAGTTGCAAAGTGTGGGTGTTACCTTTAGAATGGAGCTTGCCTTGAGAGCCACA  
CAACTAGAGTAAGGGAATTTGAGTGGTAGCCCGGTGTGGTGGTTATACCTGTAATT

>5211 len=116 tot-seq=1

AAGTAGCGTGAAGGATGACTGCCCTATGGGTTGTAGACTTCTTTTATATGGGAATAAAGT  
GGTGACGTGTGGATTTTTGTATGTACCATATGAATAAGGGGCGGCTAACTCCGTG

>5212 len=116 tot-seq=1

GGGAAACCCTGATGCAGCAACGCCGCGTGAGTGAAGAAGTATCTCGGTATGTAAAGCTC  
TATCAGCAGGGAGGAAAATGACGGTCCCTGACTAAGAAGCCCCGGCTAACTACGTG

>5213 len=116 tot-seq=1

CGTGAGTGAAGAAGGGTTTCGGCTCGTAAAGCTCTGTTAATCGGGACGAATGGTCGGTGT  
GCAAATAGTGCATGGACATGACGGTCCCGGAATAGAAAGCCACGGCTAACTACGTG

>5214 len=116 tot-seq=1

CTATCGCTAATGTTTACGCACAAAAACAGCCAATCGCAAATCTAACAGAACACTATGACT  
TGATTATTAACCTGGTAGATGTCAATGCTGGAGGAACAACACAACGTATTATTTGG

>5215 len=116 tot-seq=1

GCGTGAGTGAAGAAGGGTTTCGGCTCTTAAAGCTCTGTTGTTGGTGAAGAAGGACAGGGA  
TAGTAACTGACCTTTGTTTGACGGTAATCAATTAGAAGGTCGCGGCTAACTACGTG

>5216 len=116 tot-seq=1

GCGTGAGTGAAGAAGGTTTCGGGAGCGTAAAGCTCTGTTGGTGGTGAAGAAGGATAGAGG  
TAGTAACTGGCCTTTATTTGACGGTAAGCAACCAGAAAGGCACGGCTAACTACGTG

>5217 len=116 tot-seq=1

CCCTGACGCAACGACGCCGCGTGAGGGATGAAGGCCTTCGGGTTGTAAACCGCTTTTGAT

TGGGAGCAAGCTGTCGGGAGAGTGTACCTTTTGAATAAGCGCCGGCTAACTACGTG

>5218 len=116 tot-seq=1

CCCTGACGCAGCGACGCCGCGTACGGGATGAAGGACTTCGGGTTGTAAAAAGATTTTGAT

TGGGAGAAAGAATTCGGGTGAGTGTACCTTTTGAATAAGCGCCGGCTAACTACGTG

>5219 len=116 tot-seq=1

GTGAGGGTGGGGCCTCCCCAGGAGAAAGAACTGCCGCTGTCTGGGCTGGGCTGGGCTGG

GAGAGGCCAGACCGGCTTCACTGCTCAGATGCCACCTCCTCTCTCCGCTCTTCT

>5220 len=116 tot-seq=1

TGGGAATCTTGACAATGGGCGAAGGATGAAGGCCTTCGGGTTGTAAACCGCTTTCAGC

AGGGACGAGGCCGCAAGGTGACGGTACCTGCAGAAGAAGCCCCGGCTAACTACGTG

>5221 len=116 tot-seq=1

GCCTGATGCAGCGACGCCGCGTGCAGGATGAAGGCCTTCGGGTTGTAAACCGCTTCCAGC

AGGGACGAGGCCGCAAGGTGAGGGTACCTGCAGAAGAAGCGCCGGCTAACTACGTG

>5222 len=116 tot-seq=1

GCGTGAGTGAAGGAGGGTTTCGGATCGTAAAGCTCTGTTGTTGGTGAAGAAGGAGAGAGG

TAGTAACTGACCTTTATTTGACGGTAATCAATTA AAAAGTCACGGCTAACTACGTG

>5223 len=116 tot-seq=1

AGTCGCGTGAAGGAAGACTGCCCCGAAGGGTTGTAAACTTCTTTTGAAGGGGATTAAAGT

CGTCGACGGGTAGACGTTTGCAGTTACCATACGAATAAGCATCGGCTAACTCCGTG

>5224 len=116 tot-seq=1

GTA ACTCTGATCCAGCAATTCAGTGGTTGTGAAGAAGTTTTAGGACGGTAAAACACTTT

TAGTAGGGAAGAAAAAATGACGGTACCTACAGAAGAAGCAACGGCTAAATACGTG

>5225 len=116 tot-seq=1

GAGAGAGAGAGAGAGATTGAGGAAGTGCCCACTTTAAACCATCAGATCTCACGAGAACT

CTCTCACTATCACAAGAACAGCATGTGGGAAACTGCCCTGTGATCTAATCACCTC

>5226 len=116 tot-seq=1

TTCAAGCAGAAGACGGCATAACGAGATCTCTCTGTGACTGGAGTTCAGACGTGTGCTCTT

CCGAGCTCCTATGGGAGGCAGCAGTGGAAACTCTCCAGGAGCTCCTAGAGCAAGA

>5227 len=116 tot-seq=1

CGGGAGGTGCCAGGCTCGTTTCAACATCAGCTCTGGCAAAAATAACAGAGCAAGAACTC  
ACTCCTTCCCGAGGGGACAAGAGGATGGCACCAAGAGGCACATGACCCCAAGACTC

>5228 len=116 tot-seq=1

GAGAGGCAGGGTGGCATCACTCCCGGGCCGGGCCCTGCCCCGAGAGGGTGGGGGTGCC  
AGCAGGCTCTGCCGGGAGCCCCACTCTGATCCCTGAGGCAGACAAGACCATCCATT

>5229 len=116 tot-seq=1

GGGAAACCCTGACGCAGCAACGCCGCGTGCGGGATGAAGGCCTTCGGGTTGGAAACCGCT  
TTCAGCAGGGAAGATCCAAGACGGTACCTGCAGAAGAAGCCCCGGCTAACTACGTG

>5230 len=116 tot-seq=1

GCAGGGAGTCAATTGATAGCCTCAATCCAGAAAGATGTCTGCAGTATAGAGCAAGCCTTC  
CCACCCAGTAGCAAGCAGAGCTCCAGGAGGGCTGAGACCAACCCACCCCCGACCCC

>5231 len=116 tot-seq=1

GGGGAAGCCCTGATGCAGCGACGCCGCGTGAGTGAAGACGGCCTTCGGGTTGTAAAGCTC  
TGTGGAGGGGGACGATAATGACGGTACCCATCTAGAAAGCCACGGCTAACTACGTG

>5232 len=116 tot-seq=1

TAGGGAATCTTCGGCAATGGACGGAAGTCTGGACGAGCAAAGCCGCGTGAGTGAAGAAGG  
TTTTAGGATCGTAAAGCTCTGTTGTTAGAGAAGAACGGTGGTAGGAGTGGAAAATC

>5233 len=116 tot-seq=1

CATAGAACTAAGCCTCTCCACCTGTCCTTCTGTGCCAGCACCAAGGGAAGGAGCATCT  
GGAAGGGGGAGAGGGAGGAGGTGCACAGAGCCTGACCACAGCACCCCTCTCCGCTA

>5234 len=116 tot-seq=1

CACGTGAACGATGAAGGTCTGCTGATTGTAAAGTTCTTTATTTAGGAAAAAAGCGCGC  
TAGGAAATGACCGCGACTTGATGGTACTAAATGAATAAGTGACAGCTAACTAGGTG

>5235 len=116 tot-seq=1

CACGTGAACGATGAAGGTCTGCTGATTGTAAAGTTCTTTATTTAGGAAAAAAGCGTGC  
TAGGAAATGAGCGCGACTTGAGGGTACTAAGTGAATAAGTGACAGCTAACTAGGTG

>5236 len=116 tot-seq=1

TTTTTTTTTCAAGCAGAAGACGGCATAACGAGATCAAGTGGTACTGGAGTTCAGACGTGT  
GCTCTGCCGATCTCTACGGGAGGCAGAAGCCGCGTAATGGCAAGATCGGAAGAG

>5237 len=116 tot-seq=1

GAGGGAGGGGAAGAAGGGGGGAGGAGAGGAAAGAGAGGGGGGGAAAGAAGAAAAAGGAGGA  
GAGGAACGGGGCAGACGTGGACGGGAGGGAACCAGAAAGGCACGGCGAACGACGTG

>5238 len=116 tot-seq=1

ATATGCACAGGGTGACCTCAAACACACCTAGGGGCTGCCCTGGATCCACTGGCGGCCT  
CCTCTCTGCCTCCGATATACCTGGACTCTCCTGCCTCCCTTTTGAACCATGCCTG

>5239 len=116 tot-seq=1

CCAGCCAAGTAGCGTGCAGGATGACGGCCCTATAGGTTGTAAACTCCTTTTATATGGGGA  
TAAAGTGGGGTACGTGTTCCCTTTTTAGGTACCATATGAATAAGGACCGGCTAAT

>5240 len=116 tot-seq=1

GCGTGAGTGAAGAAGGGTTTCGGCTCGTAAAGCTCTGTTGGTAGTGAGGAAAGATAGAGG  
TAGTAACTGGCCTTGATTTGACGGTAATTAAGTAAAGTACACGGCTAACTACGTG

>5241 len=116 tot-seq=1

CAGCGTGTGAATGCACCAGTTGTATCAGTAGGTGTATCAGTATCTGCACCAGTTGTATCA  
GTAGGTGTATCAGTATCTGCAGGCGTAGCCATCGTCTGGTAGATACACTCAGTA

>5242 len=116 tot-seq=1

CTTATGAGGGAAGGCAGTCTCAGTGGCTTCTCCGCGGAGGGAACACGTGCCTGTCTCACA  
ATCAGCACACCCCAACTGCACTATGCTGAGCCCAGCAGCACACAAGACCCATATCA

>5243 len=116 tot-seq=1

TGGGGAATATTGCGCAATGGGGGAAACCCTGACGCAGCGACGCCGCGTGCGGGATGAAGG  
CCTTCGGGTTGTAAACCGCTTTTGATTGGGAGCAATAAGCGCCGGCTAACTACGTG

>5244 len=116 tot-seq=1

CAAACATTCAGACAGTTGTGGCAGTGTCTGGTATCCTATGTGAGGGACAAACTCAGA  
TCCAGCAGCATTGTTCTGAATCCTTTTTGATGGACAAACATTAGATCCCCCTGC

>5245 len=116 tot-seq=1

GCGTGAGTGAAGAAGGTTTTTCGGATCGTAAAGCGCTGTTGTTGGTGAAGAAGGATAGAGG  
TAGTAACTGGCCTTTATGGGACGGTAATCAACCAGAAAGGCACGGCGAACTACGTG

>5246 len=116 tot-seq=1

AATTGAAGAATAAAGCGCGAGAGGCTGCCGGAATCAATTATTTGGCGGCGGCAGTGAGCG

TTGACGGTGTGATGACTTGCGCGCCATGGCGGAGAGTCTGCGTTCACAGCTGGCT

>5247 len=116 tot-seq=1

CCCTGACGCAGCGACGCCGCGGGCGGGATGAAGGCCTTCGGGTTGAAACCGCTGTTGAT

TGGGAGCAAGCCTTCGGGTGAGGGTACCTTTGAATAAGCGCCGGCTAACTACGTG

>5248 len=116 tot-seq=1

GGCGCAGGCCTGATCCAGCCATGCCGCGTGAGTGATGAAGGCCTTAGGGTTGTAAAGCGC

TTGCACCGATGAAGATAATGACGGTAGTCGGAGAAGAAGGCCCGGCTAACTTCGTG

>5249 len=116 tot-seq=1

GGGTTAGAACCTCTTGCTGGCACCAGTAAGAGGAGAACTGGGTCCCAGGCCTGTTTGA

ATCCCTGCTGGAACCGCCAGAGGGAAGGGAGGATGTGGACCCTCCTCAGGAACCC

>5250 len=116 tot-seq=1

CCCTGACGCAGAGACGCCGCGTGCGGGATGAAGGTCTTCGGGTTGTAAAACGCTTTTGAT

TGGGAGCAAGCCTTCGGGTGAGGGTACCTTTGAATAAGCGCCGGCTAACTACGTG

>5251 len=116 tot-seq=1

GCGCGAAACCTCCGCAATGTGAGAAATCGCGACGGGGGGATCCCAAGTGCCATTCCTAAC

GGGATGGCTTTTCATTAGTGAAAAAGCTTATGGAATAAGAGCTGGGCAAGACCGG

>5252 len=117 tot-seq=1

AAGAAGAAAGAGAAGCGGGGGCGGGGGAGCACTTTCTAAAAAAGTAATTTTATTTTATGT

GTTTATGTATTTGGCGTGCATGTCTGTGTACCTGCTACAAGTGCAGGCCAGAATAGG

>5253 len=117 tot-seq=1

AGGAGACCTGCTTGCAAGAAGATCAACCATAGCCAGACAGGTCCTGCTCCATGGCTCCGA

CAGTGCCCAGGGAGCCCATGTAATTACTGCCGGAAGTACATCTGAGGCTTTCACCT

>5254 len=117 tot-seq=1

GACCGTTCCTTAACCGGAACCTTCCTTCGGGACAGAGGAGACAGGTGGTGCATGGTTGTC

GTCAGCTCGTGTGAGATGTTGGGTTAAGTCCCGCAACGAGCGCAACCCCTATCC

>5255 len=117 tot-seq=1

TGGGGAATAGGGCACAAATGGGGGAAACCCTGATGCAGGGACGCCGCGAGAACGAAGAAGG

TCTTCGTATAGTAAAGTTCTGTCCTATGGGAAGATAATGACAGTACCATAGAAGAAA

>5256 len=117 tot-seq=1

CGGTGAGTGAAGAAGGGTTTCGGCTCGTAAAGCTCTGTTGTTGGTGAAGAACGAGTGTGA  
GAATGGAAAGTTCATGCTGTGACGGTACTTAACCAGAAAGGGACGGCTAACTACGTG

>5257 len=117 tot-seq=1

AAACTTCGTTAGTGAATTCTTATCCATTCTGCCATTCTATATATTTTAAGTGGGGCATT  
AGGTCAGTTACATTCAACGTTAGTATTGAGATGTGAGGTACTATTCTATTCATCGTG

>5258 len=117 tot-seq=1

TGGAGCAGCGCCGCGTGAGTGAAGAAGGGTTTCGGCTCGTAAAGCTCTGTTGTTGGTGAA  
GAAGGACAGGGGTAGTAACTGACCTTTGTTTGACGGTAGTCAATTCGAACGTCTCTT

>5259 len=117 tot-seq=1

CGCCGCGTTAGTGAAGAAGGGTTTCGGCTCGTAAAGCCCTGTTGGTGAAGAAGGACAGGG  
GTAGTAACTGACCTTTGTTTGACGGTAATCAATTAGAAAGTCACGGCTAACTACGTG

>5260 len=117 tot-seq=1

TGGGAATATTGGGCAATGGGCGCAAGCCTGATCCAGCAACGCCGCGTGAAGGAAGAAGG  
CTTTCGGGTTGTAACTTCTTTAAGTGGGAAGAGTAGAAGACGGAACAACTTGAAT

>5261 len=117 tot-seq=1

GCCATGCAGTCTGCATCCCATGGCACTGCCAATTAAGTCAAGAGCTGGTCATGGTTAGC  
CCTTACAGGTGACCCACTGAGGACCAGAGAGCTTGAGAACTATCCCACATTTGT

>5262 len=117 tot-seq=1

TAGGAATCTTCGGCAATGGACGCAAGTCTGATGGAGCAACGCCGCGTGAGTGAAGAAGG  
TTTTCGGATCGTAAAGCTCTGTTGTTAGAGAAGAAAGTGGGAAGGAGTGGAAAATCT

>5263 len=117 tot-seq=1

TTGCAGTAAGCCGAGATCACACCATTGCACTCCAGGCTGGACGACAGAGCAAGACCTTGT  
CTCAAAAAAAAAAAAAAAAAAAGTTATGGATAGGGCGTGGTGGCTCATGCCTATAATC

>5264 len=117 tot-seq=1

CTAGAGCTAGTATATGAGGAATTTTGTGTTTATTTTTTAAGAAGGGTGGGCTGTG  
GTTGAAGATGTCATGTCACTATTTGAGCTCTAGATGGCCCTCCACAGGCTAGGAT

>5265 len=117 tot-seq=1

GACCACAGGAAAGGGGAGGAATTCAGACTGCGGTGTGATGAACAGCTGCCAGTCCCACC  
CCAGTGACAACCCAGCTCCGGCCCCGAAAACCTCAGTTTTTGAAGATTCTATAA



>5266 len=117 tot-seq=1

TGTCCTCCCCTGGGGGCTGCAGCGTCCTCTCCTGGGCTCTCTCCTGGGGGCTGCAGTGTC  
TACCTTGCTGGCTGGTCTCTTTTCTGTCTTTCTGCTTCTCTGCTGACCATCTCCAC

>5267 len=117 tot-seq=1

TGAAGGAAGTTCTACTGTGGATAAAATGCTATCAAACAGCATCACATGCTACAGGGAAAT  
GTTTTGTGAAAGGAACAAACTTCATTGTTTTAAGAAATTGACACAGGCACCCAACCT

>5268 len=117 tot-seq=1

CCAAGCATTTATTTACCACGGTATGGTGTGGCCTACTATGTGACAGGCTCATTGCTAC  
ACCAGAGCCATAGACACAGCCAGCTCAAGGCAGCCACCTCTGTCTGTAGCCTCCTCT

>5269 len=117 tot-seq=1

TAGGGAATCTTCCACAATGGACGCAAGTCTGATGGAGCAACGCCGTGAAGAAGGATAGAG  
GTAGTAACTGGCCTTTATTTGACGGTAATCAACCAGAAAGTCACGGCTAACTACGTG

>5270 len=117 tot-seq=1

GACCCAGGACAGGTGGTTGAAGGAATCAGGGAGGACTTCTCAGAGGAGGTAGCATCAAAG  
CCCATAGCCTGATTTGTGGCACCTCTCAGGGTTGGGGTCCCCAGTGCCAAACTGGG

>5271 len=117 tot-seq=1

GGCCACGTGGGGAACGGCCATGCTGGCGGTGGAGAGGAGTTTGCATTCATGCTGAAAGC  
CACAGAAGACAATAAAGATGCGCTGCAAAGGGAGAAACAGGAAGCTTGAAATGAGT

>5272 len=117 tot-seq=1

CTATGGAGGGTGCGCCTGGTCCCCAGCAGTGGCTGCACTCGAATTCTCACCGGGCCTCA  
GCTGCCTCCCCACGGGGCAGAGCTCAGGACCTGCAGCCCACCATGCCTGAGCCTCCC

>5273 len=117 tot-seq=1

CAAGTAGCGTGCAGGATGACGGCGCTATGGGTTGTAACTTCTTTTATATGAGAATAATC  
GACAGTACGTATAATGTTTTGCATGTACCATATGAATAAGGACCGGCTAACTCCGTG

>5274 len=117 tot-seq=1

CGCGTGAGTGAAGAAGGTTTTCGGATCGTAAAGCGCTGTTGGTGGGGAAGAAGGATAGAG  
GGAGTAACTGGCCTTTAGTTGACGGTAATCAACCAGAAAGTCACGGCTAACTACGTG

>5275 len=117 tot-seq=1

GGGGGAAACCCTGATGCAGCGACCCGCGTGAGCGAAGAAGTATTTCCGGTAGGTAAAGCT

CTACCAGAAGGGAAGAAAATGACGGTACCTTACGAAGGAGCTCCGGCTAAATACGTG

>5276 len=117 tot-seq=1

CGCGTGAGTGAAGAAGGGTTGCGGCTCGTAAACTCTGTTGTTGAGGAAGAACGTGAGTG

AGAGTAACTATTCACGCAGTGACGGTATTCAACCAGGAAGCCACGGCTAACTACGTG

>5277 len=117 tot-seq=1

GGGGGAAACCCTGATGCAGCGACGCCGCGTGAGCGAAGAAGTATTCGGTATGTAAACCT

ATATCAGCAAGGAAGATAATGACGGTACTTGACTAAGAAGCTCCGGCTAAATACGTG

>5278 len=117 tot-seq=1

CAGGTGATTAGAAGCTTCAGTGCAATGGTTTGTGTTATGGTGTCATGTGCTCTGCACAGG

GCCTGGCTCCCCGACAGCCCTGGGTCAGGGGCCAGTTAGGATGATGGATGATTACTG

>5279 len=118 tot-seq=1

TGAGCCAGATATTTTGAGATATCCTGGGAGACAGAATGCAGATTGGATACTCAGACGGGC

AGGGGGAAAAAAGAATGAGCCATCAACCCACCACTAGTGGTGAGTGCATCCCTGTT

>5280 len=118 tot-seq=1

CCGCGTGAGTGAAGAAGGGTTTCGGCTCGTAAAGCTCTGTTGTTAAAGAAGAACACGTAT

GAGATTAAGTGTTCATTTCGATGACGGTATCTAACCAGCAAGTCACGGCTAACTACGTG

>5281 len=118 tot-seq=1

AATGGGGGAAACCCTGATGCAGCGACGCCGCGTGGAGGAAGAAGGTCTTCGGATTGTAAA

CTCCTGTTGTTGAGGAAGATAATGACGGTAATCAATTAGAAAGTCACGGCTAACTACG

>5282 len=118 tot-seq=1

AAATTTAAGTGTACAATATAGTATTGTTAAGTATAATCTCGTAGAGCAGATCTCTTGC

TAACTTAACTTTACGCTTCTTGATCAGTAGGTCCCCATTCCCCTCCACCTGTGCT

>5283 len=118 tot-seq=1

CGCGTGCGGGATGACGGCCCTCGGGTTGTAAAGCTCTGTGATCCGGGACGAAAGAGCCTG

AGGTAAATAGCCTGTGGAAGTGACGGTACCGGAAAAGCAAGCCACGGCTAACTACATG

>5284 len=118 tot-seq=1

TGGGAATATTGCACAATGGAGGCAACTCTGATGCAGCAATTCGCGTGTGTGAAGAAGG

GTTTAGGATTGTAAAACACTTTTAGTAGGGAAGAAAAAATGACGGTACCTACAGAAG

>5285 len=118 tot-seq=1

CGCGTGAACGATGAAGGTCTTATAGATTGTAAAGTTCTTTTATATGGGAAGAAACGCTAA  
GATAGTAACTGGCCTTTATTTGACGGTAATCAACCAGAAAGTCACGGCTAACTACGTG

>5286 len=118 tot-seq=1

CGCGTGTGAGATGAAGGTCCTCTGGATTGTAAATCACTTTTATTAGGGAAGAACGGCAAG  
TATAGGAAATGCTACTTACGTGACGGTACCTTTTGAATAAGCCCCGGCTAACTACGTG

>5287 len=118 tot-seq=1

CCGCGTGAGTGAAGAAGGGCTTCGGATCGTAAAGCTCTGTTATAGGTGAAGAAGGACAGG  
AGTAGTAACTGACCTTTGTTGACGGTAATCAATTAGAAAGTCACGGCTAACTACGTG

>5288 len=118 tot-seq=1

TGGGGAATATTGCGCAATGGGGGAAACCCTGACGCAGCGACGCCTCTTTCTTTATTAATT  
CCTTCTTTTTTTAAACCTCTTTTTATTTTTATCAATCCTTTTTTTTTATTTTACCTTT

>5289 len=118 tot-seq=1

TTTTTTTCAAGCAGAAGACGGCATAACGAGATTATAGCGTGACTGGTTCAGACGTGTGCT  
CTTCCGATCTCCTACAGGAGGCAGCAGCTCCAGCAGCCCCAGGGGGCTCTAGCCACAG

>5290 len=118 tot-seq=1

CAAAATACAACAAAGAAACAACAATAAATATTCTTGAAACTAAATTTTAAAATAACTC  
AATATCATTTAGTAACTCAAAGATTAATAACACATGGCTGATGGGCAGCCCGGGATT

>5291 len=118 tot-seq=1

TGGCGTTCTGTCCGAGCCTGTTTGTGTTGCTATAAAGGAATACTCGAGGCTGGGTAACTT  
ATGAAGAAAAGAGGTTTATTTGGCTCAAGGTTCTGCAGGCTGTACAAGAAACATGGCG

>5292 len=118 tot-seq=1

CCCGACCCGGGGAGGTAGTGGCGAAAAATAACAATACAGGGCTCTTTCGAGGCCCTGTAA  
TTGGAATGAGTCCACCTTAATTCCTTTAACGAGGATCCATTGGAGGGCAAATCTGGTG

>5293 len=118 tot-seq=1

GGCCCTGGAGGGACTGAGATCTGGGAGGAGTTAGGAAGGGCCAGAGGCTGAGGATCCTGA  
CCCCAGGGCTTGTGATAGCAGTAGAGGAGAAGCAGTACTGATTCCTGGGGCTGTGTAG

>5294 len=118 tot-seq=1

AGGAGCACAGTAGCTCCAGATACTTGCCTCACACCGAATTTTTCTGAATATAAATGGATT  
TAAACAACTATTTAAATTGTTATAGAATATTATGAAAACATTCACAGTTTATTAGA



GAGGGATGCCTGCAAAGCTATCCTTTGAGCATGAGCGGTAGGTGCCTACGGAGCCTTCT

>5305 len=119 tot-seq=1

CCAAGTCGCGTGAGGGAAGACGGTCCTATGGATTGTAAACCTCTTTTGTGGGGAGCAA

GAGGCCACGTGTGGTCAAAGTGAGGGTACCCGAAGAAAAAGCAGCGGCTAACTCCGTG

>5306 len=119 tot-seq=1

CCTCTGCTTCCCCAGGAAATGGTCCCACCAGACAACCACGGGACTTGAGGCAAGCCAACT

CACTCCCCTGGCCTCAGCTGCCCTCTGATGAAGGGTTCTACCGCAAATAATGGCTTG

>5307 len=119 tot-seq=1

ATGCCCCACGCAGATGGGTCCATGCTGGGAAAAAAAAAATGAGCTGCCCTCTGATCCTGCT

GCTGGATGTAGTTTGCTCTGCTGCCACCAGGCCAGCCACTTATAAGGCAGTGGCTCCAC

>5308 len=119 tot-seq=1

CCATTCAGAGAAGTCAAATACAAAACAGTATTGGTTTTTTTTGAAAGTGATCTTAACTGTA

GGCATAGAGAAATGAGATAAAAGTTTTCTTTGGTGTCTTGTGAGACATATCCGTATAGC

>5309 len=119 tot-seq=1

TTCTGGGACGGGCAGAAGTACAGAGCCGCTGAGGCAGCACCTTGGCGGACCGCAGACAG

CCGGCCACCGTCCGGACCAGAGGACAGGTGTCCGCCTGGCTTGGGAGGCGGCCTCAGCC

>5310 len=119 tot-seq=1

TAAACAACAGCGAGTGTCTCTTGGAGGCCGGTTAAGAACAGAGAAGTAGACTGGACAGGT

GACTGAGGTGTTAACAGCACATATGGAAGGCTCTTGCAGGAGACAGGTCTGATTCCAGA

>5311 len=119 tot-seq=1

CGCGTGAACGAAGAAGGTATTCGTATCGTAAAGTTCTGTCCTATGGGAAGATAATGACAG

GGGTAGTAACTGACCTTTGTTTGACGGTAATCAATTAGAAAGTCACGGCTAACTACGTG

>5312 len=119 tot-seq=1

ATGGGCGCAAGCCTGATGCAGCAACGCCGCGTGAACGATGAAGGTCTTCGGATCGTAAAG

TTCTGTTGCAGGGGAAGATAATGACGGTACTCAACAAGGAAGTGACGGCTAACTACGTG

>5313 len=119 tot-seq=1

TAGGGAATCTCCCACTGGACGCAAGTCTGATGGAGCAACGCCGCGTGAGCGAAGAAGG

TTTTCGGATCGTAAAGTTCTGTTGTTGGTGAAGAAGGATAGAGTTATTAAGTGGCCTTT

>5314 len=119 tot-seq=1

TGAGGAATATTGGTCAATGGGCGATGGCCTGAACCAGCCAAGTAGCGTGAAGAAGGACAG  
GGGTAGTAACTGACCTTTGTTTGACGGTAATCAATTAGAAAGTCACGGCTAACTACGTG

>5315 len=119 tot-seq=1

CGCCGCGTGGGTGATGAAGGCCTTCGGGTTGTAAAGCCCTGTGGGGAGGGACGAATAACA  
GTGACCCAATACGTCATTGGATGACGGTACCTCCTTAGCAAGCACCGGCTAACTCTGTG

>5316 len=119 tot-seq=1

GAGGAACTCTGATCCAGCAATTCTGTGTGTGAGAAGAAGTTTTAGGACTGTAAAACAG  
GTTTAGTAGGGAAGAAAAAAGGACGGTACCTACAGAAGAAGCAACGGCTAAATACGTG

>5317 len=119 tot-seq=1

CTGTGGAACTGCACTTGTCCCCTCTGGGGAGCTGGTGTGGCAAAGGTGTGTGTCTTTCC  
TTGGGAGGCAAATGGATGCCTTAGAAGGTGGCCAGACTTGAGTTGTTAAGAATCGTTG

>5318 len=119 tot-seq=1

GGCGTGCCAGACTCCTGGAGCCTGTCCCCTAACAAACCCACTCCCCAAGGCCTCGCTGAC  
CCTGAAGCTGGGCTTCGCCTGCCCTATTCTCCGGGTGGGGCTGTAGGAGCCTCAGC

>5319 len=119 tot-seq=1

CCCGCCGCGCTCCTGACCTCCCGGGCTGACTCCCTCTGTCGTGGGGCCGTCCCGTGCACG  
CTGGGCGTGGGCAGCCCTGAGCTCCCGTCAGGACTGTCAATGTCTGGCCTACACTACG

>5320 len=119 tot-seq=1

GAGGATGACAGAAAGAGAAGTCTGGGGTCCAGGGAGCCAGACAGAGAGCACAGAGGGGAG  
GAAACATTTTTGGAGTTGGGCCTTGGCACTGGGGCTGGAAGAGAGAAAGTGTGTACAGG

>5321 len=119 tot-seq=1

TGGGGAATCTGCACAATGGGCACAAGCCTGATATAGCGACGCCGCGTGGGGGATGACGG  
CCTTCGGGTTGTAAACCTCTTTCGACTATGACGAAGCCTTTTTGGTGTGCGGTAGTGGTA

>5322 len=119 tot-seq=1

AACCAGGGATGGCTGTGAGTCGGGGAATCGGATGCTAAGATCTTGAGGATGACACAGATT  
CCAGGTTGTGGAGGGCCAGCCCTGCCAAGGGATGGGAATGAATTGTGGACATGGACCTC

>5323 len=119 tot-seq=1

CAGAGCTGAAGAAATGCATGTCTAGAACTTCCCTGTTTATACTCGGGCCTCTTGAAAACA  
GGGAATGTGCTTTACCCATTTGCCTGCCTTCTTCAGTCAAGCTTCATGAGTGGTAACAC

>5324 len=119 tot-seq=1

TAGGGAATCTTCCACAATGGACGCAAGTCTGATGGAGCAACGCCGCGTGAGTGAAGAAGG  
TTTTCGGATCGTAAAGCTCTGTTGCGGTAATCAACCAGAAAGTCACGGCTAACTACGTG

>5325 len=119 tot-seq=1

GCCAAGTAGCGTGCAGGATGACTGCCCTATGGGTTGTAACTTCTTTTATATGGGGATAA  
AGTGTTCACGTGTTCCCTTTTGCAGGTACCATATGAATAAGGACCGGCTAATTCCGTG

>5326 len=119 tot-seq=1

CAGAGCCAAAAGATAGCGGCTCAATTAGTCTTGGTCCTACAAAACCTATTATCCACTCT  
CAAAGTTACGAGGAGAACACACACCAGCTCACCTGTATGCAAGAGCCAAAGCCCAGGCC

>5327 len=119 tot-seq=1

TTCAAGCAGAAGACGGCATAACGATATCGACAAGTACTGGAGTGCAGACGTGTGCTCTTC  
CGATCTCTACGGGAGGCAGCAAGAGACAAAGAGAGGAGGGGAGAAGGGTATGAAATCC

>5328 len=120 tot-seq=1

GAGGCTTTTGCCTAGTGAGCAGCGCCTCCCCTAGGCTGAGAGCAGAAGAGGAGGAGAGGC  
AGGGTACCAGTCCCAGGAGGGATGACAGCACACAAGAAATTGACACCCACCACCAGCTGA

>5329 len=120 tot-seq=1

GCCATAAGAGGGCAATATGAGTGTGTTGTGTCAGAGATAATCATCAGGAATGGCCTGTCA  
AAATATATTTTCATAGAGTAGATTACACCTTGACAACATTGGAGAGTTTGATATCCTGTG

>5330 len=120 tot-seq=1

ACATTTAGAGGAGAGTAGCTACTCCTTGCCACACCCCATGGTAACAAGTATCATCACATG  
GAGAAATTGGAATGCACACACACATACTACTCGAGTGAAATATAAATTTGTTGTGGCCGG

>5331 len=120 tot-seq=1

CTGATGCAGGGGACATGGAGGGTGCTGCTTACCGACATTCTGCTTTCTTATAGATTCCA  
GGACCAGCAGCGGGTAATTTCTAGATCGGAAGAGCGTCGTGTAGGGAAAGAGTGGGCCAA

>5332 len=120 tot-seq=1

TAGGGAATCTTCGGCAATGGACGGAAGTCTGACCGAGCAACGCCGCGTGAGTGAAGAAGG  
ATTCGGATTGTAAAGCTCTGTTGTCAGAGAAGAACGTTGGTAGGAGCGGCAAATCTACC

>5333 len=120 tot-seq=1

AAGACGGCATAACGAGATCACTGTGTGACTGGAGTTCAGACGTGTGCTCTTCCAGCAGTCG

CGGTAATGCAGAGATCGGAAGAGCGTCGTGTAGGGAAAGAGTGGGCCAATGTGTAGATCT

>5334 len=120 tot-seq=1

TAGAGAATATTGCACAATGGAGGAACTCTGATGCAGCGACGCCGCGTGATTTAGAAGGC

CTTCGGGTTGTAAAAATCTTTTCTATGGGAAGAAGATGACAGTACCATAGGAATAAGGAC

>5335 len=120 tot-seq=1

CGCCGCGTGAGTGAAGAAGGGTTGCGGCGCGTAAAGCTCTGGTGGTGGTGAAGAAGGACA

GGGGTAGTAACTGACCTTTGTTTGACGGGAATCAATTAGAAAGGCACGGCTAACTACGTG

>5336 len=120 tot-seq=1

CAGCAGGAAGTCTCAGCCAGCATGATAAGCAGGAGCAGAATGCCAGCAGCCCGCGTAAT

CTTAAGATCGGAAGAGCGTCGTGTAGGGAAAGAGTGGGCCAATGTGTAGATCTCGGTGGT

>5337 len=120 tot-seq=1

CGCCGCGTGAGTGAAGAAGGGTTTCGGTTCGTAAAGCTCTGTTGTTGGTGAAGAAGGACA

GATATAGTAACTGTTATTGGTTTGACGGTAATCAATTAGAAAGTCACGGCTAACTACGTG

>5338 len=120 tot-seq=1

CGCCGCGTGAGTGAAGAAGGTTTTCTGATCGTAAAGCTCTGTTGTTTGTGAAGAAGGATA

TAGTTAGTAACTGGCCTTTATTTGACGGTAATCATCCAGAAAGTCACGGCTAACTACGTG

>5339 len=120 tot-seq=1

GCTTGTGGTAAATATTTGGCGTCCAGCTCCATTTGGCATGGTTATATTTGCTCCATTGGG

GGAAAAAATAACTCTCTGTTTGCCATGGTGATGGATTTGTCGTTCTCCAATTAGAAGTTG

>5340 len=120 tot-seq=1

AATGGGGGAAAAAGTGATGAAGAAAAGACGAGTGAGTGATGAAGGTTTTCGGATCGTAAA

GCTCTGTCTGTGGGGAAGATAATGACGGTACCCAAGGAGGAAGCCAAGGCTAACTACGTG

>5341 len=120 tot-seq=1

TGGAAAGCTGTGGGCTGGCACTGAAATGAGCAGCTGCTGCTATGTCACTGAGTGATGTG

GGGTGCCGGTGAATCAGTGTATCACTGAGCCCTGATAGAATGGTGGAAAATATATATTC

>5342 len=120 tot-seq=1

TTTTTTTTTCAAGCAGAAGACGGCATAACGAGATTTATCCGTGACTGGAGTTCAGCGTGT

GCTCTCCGATCTCCTACGGGAGGCAGCGGCCCGTCTGAGAAGTGAGGAGCCCCTCCGC

>5343 len=120 tot-seq=1



GAGTAGCAATTTCTTCTCTAAGTTTCTCTCAACCCTCCTTCTCAAAGGAAGAGATTTG  
TTTCTGGCTGGCAAATGCCTGCTATTTGCCCTTGCTTACATGCATTATCTTATTTAATG

>5344 len=120 tot-seq=1

GATTTTTAAGAAGCTCTTCAGGTGATTCTAATGTAAGGCCAAATTTAGAAACCACTGCTT  
AAGCTTTGGTGCTTAAGAATTGCTGCTACTTCTTTTATTCTAGCCCTCCTGTGATGAGAT

>5345 len=120 tot-seq=1

AATTGCTTGAACCCAGGAGGTGGATATTCCAGTGAGCCGAGATCACACCATTGCACTCCA  
GCCTGGCAACAAGAGCGAAACTCTGTCTCAAAAAAAAAAACACCCTAATTCCAGGCCAA

>5346 len=120 tot-seq=1

AAGGGGCGAAAGCCTGATGCAGCGACGCCGCGTGAGAGAAGAAGTATTTGGTATGTAAA  
GCGCTATCAGAAGGGAAGAAAAGGACGGTACCGGACGAAGAAGCTCCGGCTAAATACGTG

>5347 len=120 tot-seq=1

GGAAACTGTTTTGGGTTTCTGGACCGACGGTACCTGCAAGGTGGGGATGATGAACCCGG  
CGCTTGGGCACTGAGGTTGGACCTGACGGAGGCGGAAGTGGCATCATTTCTGGCTCTTG

>5348 len=120 tot-seq=1

TGGGGAATATTGCGGCGACGCCGCGTGCGGGATGAAGGCCCTTCGGGTTGTAAACCGCTTT  
TGATTGGGAGCAAGCTTTCGGGTGAGTGTACCTTTCGAATAAGCGCCGGCTAACTACGTG

>5349 len=120 tot-seq=1

TGGGGAATATTGCACAATGGGCGCAAGCCTGATGCAGCAACGCCGCGTGAACGATGAAGG  
TCTTCGGATCGTAAAGTTCTGTTGCAGGGGAAGATAATGACGGTACCCTGTTCTTCCGCC

>5350 len=121 tot-seq=1

AACATGTTTTGGATTAATTCCCATTGCTTACATGTTGTTTGGAGTAGGGGAGGTA  
GGTGGACCATGGCAGGAAAGCTCTTGCTTCCAAGCTCAGCAGGTCTCTCCTGTGCTTCCC

T

>5351 len=121 tot-seq=1

TCTGATGGAGCAACGCCGCGTGAGTGAAGAAGGGTTTCGGCTCGTAAAGCTCTGTTGTTG  
GTGAAGAAGGACAGGGGTAGTAATGACGGTAATCAATTAGAAAGTCACGGCTAACTACAT

G

>5352 len=121 tot-seq=1

CTCGTCCATGAACGGGCACTGCGAAGAGAGGTCAGGGACACAGCGGCCATTAAGGGCTGG  
CACAGCTGTCCTTCAAGGGCAGGCAGCACTCCACAAGGGTCACAGCAGAGAAAGAAACAG  
C

>5353 len=121 tot-seq=1

TTGAGATTTGGGTGGGCCCACAGCCAAGCCGTATCACCTACTGGAACCAGAAGAAGAATG  
AGCAACACATGAAACAGAGAGGGCCACCTCAGCTGCTCTAGCTGAGACCAGCCTAGATCA  
G

>5354 len=121 tot-seq=1

CAGCCATGCCGCGTGTGTGAAGAAGGGCCTATGGGTTGTAACTCTTTTGTGGGAGAAC  
AAAACCCGGGACGTGTCCCGACTGCGTGTATCCGAAGAAAAAGCATCGGCTAACTCCGT  
G

>5355 len=121 tot-seq=1

GCGGCCATGCCGCGTGTATGAAGAAGGCCTATGGGTTGTAACTGCTTTTGTATGGGGAT  
AAAGTTAGGGACGTGTCCCTATTTGCAGGTACCATACGAATAAGGACCGGCTAATCCGT  
G

>5356 len=121 tot-seq=1

CAATGGGGGAAACCCTGATGCAGCAACGCCGCGTGAGGGAAGAAGTTTTCGGTTTGTA  
AGCTCTGTCCGCAGTGAAGATAATGACGGTACCTGAGGAAGAAGCCCCGGCTAACTACGT  
G

>5357 len=121 tot-seq=1

TCCACAATGGACGCAAGTCTGATGGAGCAACGCCGCGTGAGTGAAGAAGGGTTTCGGCTC  
GTAAAGCTCTGTTGTTGGTGAAGAAGGACAGGGGTAGTAGAAAGTCACGGCTAACTACGT  
G

>5358 len=121 tot-seq=1

GGACCGAGAGTCTGATCCAGCAATTCTGTGTGCACGATGTAGTTTTTCGGAATGTAAAGT  
GCTTTCAGTTGGGAAGAAAGAAATGACGGTACCAACAGAAGAAGTGCCGGCTAAATACGT  
G

>5359 len=121 tot-seq=1

GCAGCGACGCCGCGTGAGGGATGGAGGCCTTCGGGTTGTAACTCTTTTATATAAGAAT

AAAGTGCAGTATGTATACTGTTTTGTATGTAGTATATGAATAAGGAGCGGCTAACTCCGT  
G

>5360 len=121 tot-seq=1

CTGCTAAGTGTCAAACTGTGTTCAAATAAGGCAAACACCATCCTGTAACCAATCCAGCT  
GTTTCCATACCTTACTGCCAGTTTCTGTACATCATTTCCCTTTTCTGTCTATAAATCTTC  
T

>5361 len=121 tot-seq=1

ATGCCGCGTGATGAAGAAGGCCTTCGGGTTGTAAATTTCTTTCAGCAGGGAAGAAGGGA  
GTAAAGTTAATACCTTTGCTCATTGACGTTACCCGCAGAAGAAGCGCCGGCTAACTCCGT  
G

>5362 len=121 tot-seq=1

CTCTGCACTTCCCAGCTCTGTCAATCCCTAAGGCTATGCAGCAGCCACCCCCACCAGGCC  
CTCGGGGCACTGAAGCCTCACCCACCTCCCCAGGGGCAGGACATTGATCCGCTTCCGCAC  
C

>5363 len=121 tot-seq=1

CGCCGCGTGAGTGAAGAAGTTTTTCGGAGCGTAAAGCTCTGTTGTAAGAGAAGAACGTGT  
GTGAGAGGGGAAAGTGCACACAGTGACGGTGACTGACCAGAAAGGGACGGCTAACTACGT  
G

>5364 len=121 tot-seq=1

TGGCTCAGTCACACTTCCCGCAGGAGAGGGCCAGCCTGGCTGAGCCTGTATTTCTCCCTC  
CCCCATGGAGTCTCTGCTCCCTCTGGCTCCCGGAGTCCACAGACCTCTGCATCTCCC  
T

>5365 len=122 tot-seq=1

TTCCCTCTTTGTTTGTGTTGTTGTTGTTTTCAGATCAATTACAAAGCATGGTAA  
GTTTAGCAAATGTTGAATGTTTTAATTTGAATTTCAAATGTTCTGGTCAAACCTTTTTT  
AG

>5366 len=122 tot-seq=1

ATTAGTTGAGAGAGCACTGGCTAGCGTGCTCAATGCTCCAAATTCAATCCCCCAGTATGG  
TGTAACCTGGCACAGTAGCACATGCTTGTACTCCTAACATTCGGGAGATATGTGTAAGAA

AC

>5367 len=122 tot-seq=1

CCAGCCAAGTAGCGTGAAGGATGAAGGGTCTATGGAGTGTAACCTTCTTCTAGACGGGAA

TAAACGAATCCACGGGTGGATTTTTGCATGTACCGTATGAATAAGGAGCGGCTAACTCCG

TG

>5368 len=122 tot-seq=1

AATTCTATGTTATCTATATTTTAGAAGATAATATCCCAAATGCACCAACATCTGTA

TGATGCCCACTTGTTTTCAAGTATAATGGGCTAAAGGTTGGAAAGACAACCTGAGTTTGG

TC

>5369 len=122 tot-seq=1

AACGCCGCGTGAGTGAAGAAGGATTTAGGTTGGTAAAAATATGTTGTTAGAGAAGAAAAG

AGAATAGAGTAAATGTTATGAGTGTGAAGGTATCTAACCAGAAAGCCACGGCTAACTACG

TG

>5370 len=122 tot-seq=1

ACTCCAGCTCAGCGCACAGCATGAGGAGGACGAGGGAACAATAGGGCGTTCCTTTGTGCC

TGCCCTTGAAACGCGGTGGAGGCCACTCAGTGAGCCCGGGCAGTGCCATCGCTCACGTGT

CC

>5371 len=122 tot-seq=1

GGAGCGGGTGGGACATAGGGCTGAGCAGGCCAGGCCCAAGGAGCACGTGCTTTTCTGGA

CAGGCAGAGGGACAGTGCCCTGTGTTCCAGGACACACAGATGCATGAGGAGGAGGAGGCC

AG

>5372 len=122 tot-seq=1

CAGCCAAGTCGCGTGAGGGATTAAGGCCCTACGGGTCGTAAACCTCTTTTGACAGGGAGC

AAATGCGCCACGTGTGGGCGAGTGGAGAGTACCTGAAGAAAAAGCATCGGCTAACTCCG

TG

>5373 len=122 tot-seq=1

TTCCCTCTGAGTGTCTGCTCTGATAAAGAACCTCCAGAGGCTGGTCCTTGTCTCAA

GCCCACTAGAAATTCTGCCATGAGTGTGAGTTTTAGAGACTGGGGAAAATAGAATACA

CA

>5374 len=122 tot-seq=1

GGGCAACTGTGCAAACCTGTCCACCAAGAGCTGATGGGCTCATGGGTCCAGAGTGGAGAT  
GTCACTGCTGCAGGAGCCGGACGGCCAATGCTGAGCCAGGCCAGGAAGCCACAGCAAGTC  
AG

>5375 len=122 tot-seq=1

TAGGGAATTTTTACAATGGGCGCAAGCCTTATGAAGCAATGCCGCGTGAACGATGAAGG  
TCTTATAGATTGTAAAGTTCTTTTATATGGGAAGACCGGAAGAGCGTCGTGTAGGGAAAG  
AG

>5376 len=122 tot-seq=1

CACGGCGGTGAAAATGGCGGGCAGCCGGTGATAATCGTAGGTGCCGTCCCGTTTCACTTT  
GGCGATGACTTCGGCCATGGTGTCCGGGAGTATCCCGAATTTTTGCTGGAACAGACCTAT  
GG

>5377 len=122 tot-seq=1

AGGCAGTGCGAAGAGGAAAGTTTGTAGCTCTAAACACCTACGTCAAAAAGTCTGAAAGAG  
CACAGACAATCTAAGTTCACATCTCAGGGAAGTCTAGAGAAGCAGGAACAAGCCAAACCCAA  
TC

>5378 len=122 tot-seq=1

GTGCATTGAGTTGAACTGAAATCAACTGAGTTGAGTTGGATGTAAAGAGCAGGGCTGGC  
TCTCAGCTGCTGCCATCCCTGGCCAGGCCTCACCTCTCGGTGAACATCTTCACCTTGCT  
GA

>5379 len=122 tot-seq=1

CCAGCCAAGGAGCGGGCAGGAGGACGGCCCCGAGGGGGGGGAAACGGCGGGGGGGGGGAA  
GAACGGACATGACGTGTAATGTTTTGCATGTACCCTCGAATAAGGACCGGCTAATTCCG  
TG

>5380 len=122 tot-seq=1

AGAGCCTTGGGAGGGAGCACAGCCCTGTGGTGCCTTTTCTGGGCCAGTGACCTGGATT  
TGAACCTGGCCTTCAGCATAACATTTCTGCTGTTTTAGCTATCACATTTGTGTGTTTTG  
TT

>5381 len=122 tot-seq=1

AACCATGAAGCAGGAGGCGGCAGTGCTAATGGCCCCTGTACCCGAAGTAGCTCTAATTGC  
AGAGTGAGGCAGCCAGAGGGGGCCCCTCATGGGCAGAGGAAGGCAGGGACAGTGCTCCTAC  
CT

>5382 len=122 tot-seq=1

TCATGGGCTCCAGTTTATGCTAGTGAGTTCCAGCTCATTCTCCACTTTACCAACTGCCTG  
CCCCGGGAACTCAAACCTCCAGCATCAGATATGAAGACAACAACCGTGTAGAAACTGCTT  
AA

>5383 len=122 tot-seq=1

AAATTTGGACACAGCCACCCATGTGCACACAGGGATAACACAGGCAAAGATGTCAAGATG  
AAGGCAAAGATTGGGGTGATGCTTCTATATGCCAAGGAACACCAAACATGGCCAGCAAAC  
AC

>5384 len=122 tot-seq=1

AACGCCGCGTGAGTGAAGAAGGGTTTCGGCTCGTAAAGCTCTGTTGGTAGTGAAGAAAAA  
TAATGGTAGTAACTGGCCATTATTTGACGGTAACTACTTAGAAAAGTCACGGCTAACTACG  
TG

>5385 len=123 tot-seq=1

TGGGGAATAGAGCACAATGGGGGAAACCCTGATGTAGAAACGCCGCGGGAGTGAAGAAGG  
TTTTCGGATGGTAAAGCTCTGTTAGCAGGGAAGAGGAAGGACGGTACCTGCAGAGGAAGC  
CAC

>5386 len=123 tot-seq=1

AGACAACGACTGCCCAAACCTGAGACCCTTCCCATGGACAAGAATCAACCCGACACTATT  
AATGATGGTCTGTTATACTTGCAGACAGGAACCTAGCATAACTGTTCTCTGAGAGGTTAT  
CAC

>5387 len=123 tot-seq=1

CGGCAGCCAGGTGTTTCCTTCTTTTCAAGTCTAATCCACTAAGAGCAAACACCAGCTTG  
TTGCCACACAGCCTTACTTCAGAAAAGGAAACAAAGTATACAGGCTAACAACATGTGTCA  
ATG

>5388 len=123 tot-seq=1

CAGCCCTGCACAGCGTGTCTGTACCCCAATCATGTGCCAGAGGACTCACGAGCCTAGG

TGGGCTTCTTTCAAATGGCTCCTAGGAGTGAACAAGGTGCTGCCATGGCCAGTGGAGACT  
ATC

>5389 len=123 tot-seq=1

GGGAGGGAGGGTTACAATCTAACGTTTGGCTAAGGGTATAGGTAGAGGGGTAGGGACTAT  
GATTTGCACTGGGCATCACTTAAAAGTTGAGAAAGCAAGGGTACAGCCAAAAGGTCCTTA  
AGA

>5390 len=123 tot-seq=1

GACAACAGAAAACAGATGCCAATTATTTGCCGATGGCTGCTGGAAAACAAAACATTTTAT  
GACATTTACTCTGCCTTAGCAGAGCTGCTTCTAGTGCCAAAGAAAAATAAACTGGTCAA  
TTA

>5391 len=123 tot-seq=1

GCGACGCCGCGTGCGGGATGAAGGCCTTCGGTTCGTAAACTCTGTTGTTAGGGAAGAAA  
AAATGTATAGTAACTATATACAAAAGAGACGGTACCTAACCAGAAAGCCACGGCTAACTA  
CGT

>5392 len=123 tot-seq=1

ACCAGCCAAGTAGCGTGCAGGACGACGGCCCTATGGGTTGTAAACTGCTTTTATGGGGGG  
ATAAAGTGCGTGACGGGGCATGCATTGCAGGTACCACATGAATAAGGACCGGCTAAGTCC  
GTG

>5393 len=123 tot-seq=1

TACCAATGAGACCTTTCAGGAGCTCAAAGATCCCACCAGGCTCCCATCAGCCAAGATCT  
GTGGCCGGGGGCAGGGTAGCAAGCCAATTTCTGGGTGGAGCTGGGCTTTGTCCAGGTGC  
CTT

>5394 len=123 tot-seq=1

ACCAGCCAAGTAGCGTGAAGGATGACTGCCCTATGGGTTGTAAACTTCTTTTATACGGGA  
ATAAAGTGAGTCTCGTGAGACTTTTTGCATGTACCTTATGAATAAGGACCGGCTAATTCC  
GTG

>5395 len=123 tot-seq=1

AAGACGGCATAACGAGATTGGTCAAGTACTGGAGTTCAGACGTGTGCTCTTCCAACAGCCG  
CGGTAATCCCAAGATCGGCAGAGCGTCGTGTAGGGAAAGAGTGTGCCAATGTGTAGATCT

CGG

>5396 len=123 tot-seq=1

TAGGGAATCTTCGGCAATGGGGGCAACCCTGACCGAGCAACGCCGCGTGAGTGAAGAAGG

ACAGGGGTAGTAACTGACCTTTGTTTGACGGTAATCAATTAGAAAGTCACGGCTAACTAC

GTG

>5397 len=123 tot-seq=1

TAGGGAATATTGCACAATGGAGGAAACTCTGATGCAGCCATGCCGCGTGTGTGAAGAAGG

ACAGGGGTAGTAACTGACCTTTGTTTGACGGTAATCAATTAGAAAGTCACGGCTAACTAC

GTG

>5398 len=123 tot-seq=1

ATAGCTTTAGGGTAGTTTCTAGGGTGCTTTGGCTTGTGGGACTGAGAGCTTTAGGCTCTA

GAGTCTCAGCTGTGGGGATTCAATTGTAGATGAGAGCACCAAGCCAGAAGAGGGAAGGGGA

GCC

>5399 len=123 tot-seq=1

GGTGGGCACCAGGACAGTCAGAAGGGAGATCTCAGAACATTTAAGGAGACTAGAGGATAT

TTAAACAAGTAGCCAGTGAGGCACTGGAGATGAAGAGAAGGGAAGTACGTCTGCTCAAGG

ATG

>5400 len=123 tot-seq=1

CGCAGTGTACGGGGGACAGGAGTGGCGCCCCCTCAGTGGCCGGTCCCTCCTCGGGGGCC

CAGCTGTGGGGACACCCAGCAGTGAGCGAGAAAGCCCATCAGGCATCCCACCTCTCCCA

CCC

>5401 len=123 tot-seq=1

ACCAGCCAAGCCGCGTGAGGGAGGAAGGTACAGAGTATCGTAAACCTCTTTTGTGAGGGA

ACAAAGGCGGGGACGTGTCCCCGGATGAGTGTACCTTTCGAATAAGCGCCGGCTAACTAC

GTG

>5402 len=123 tot-seq=1

TGGGGAATATTGCACAATGGGCGCAAGCCTGATGCAGCCATGCCGCGTGTGTGAAGAAGG

ACAGGGGTAGTAACTGACCTTTGTTTGACGGTAATCAATTAGAAAGTCACGGCTAACTAC

GTG



>5403 len=123 tot-seq=1

GAGTAGTCAGCTGCTCCCGGGCAATGGGAGGGAGTGAGGCCACTGGTTCAAGGAAGAGG  
ACTTCCAGAGCATGGAGTCAATCAGGCAGCACCTGCCTGGAGGTTCTCTGGAGGGCGCCGA  
GTA

>5404 len=123 tot-seq=1

TAGGGAATCTTCCACAATGGACGCAAGTCTGATGGAGCAACGCCGCGTGAGTGAAGAAAAG  
ATAGAGGTAGTAACTGGCCTTTATTTGACGGTAATTAAGTAAAGTACACGGCTAACTAC  
GTG

>5405 len=123 tot-seq=1

TGGGCAGCTGGGAGCTGCGACTCATTCAAAGAGAGGGAGTTAGTGCAGGGTACCGAGATC  
AGGAAGAGGAGTGGTGCAGAGGTGGGAGGTGATGAGACTCAAGACTACAGAGAGAAGAAA  
GGG

>5406 len=123 tot-seq=1

CCACAATGGACGCAAGTCTGATGGAGCAACGCCGCGTGAGTGATGAAGGGTTTCGGCTCG  
TAAAGCTCTGTTGTTGGTGAAGAAGGACAGGGGTAGTAACTGACCTTACGGCTAACTAC  
GTG

>5407 len=123 tot-seq=1

TGGGGAATATTGCACAATGGGCGCAAGCCTGATGCAGCCATGCCGCGTGTATGAAGAAGG  
ATAGAGGTAGTAACTGGCCTTTATTTGACGGTAATCAACCAGAAAGTACACGGCTAACTAC  
GTG

>5408 len=123 tot-seq=1

AAAAACAAGCAAGTGTGGTGTCAATTAATGTTTAAATATCTAATTTTGAAGACCTCAGAAG  
GCTACTAAAACACCTCATTCAATTTGTTTGCAATTAAGAAAGAAAATTATATTATAGCTC  
TTG

>5409 len=123 tot-seq=1

TTTGAAAATTCAGTTCTGAGACCCATTAGGCATTCTTCTTGGAGGTATCCAGTAGGCA  
GCTATTATAGGAGTCTGGAGTGTGGAGAGGGGCTGGAGCTGAAGAGGGCTTTTTGGAAT  
TCG

>5410 len=123 tot-seq=1

CTCAGGGTACGGGGGCCCGGGCCCGGGGCTGGTCCACGGGAAGGAGATGCCGAAAGGGTA  
CCGGCGGCCCTGGCCACGCCAAGCCGCCCTACTCCTACATCTCGCTCATCACCATGGC  
CAT

>5411 len=123 tot-seq=1

TTTTTTTTTTTTTTTTTTGAGATAGAGTCTCGCTCTGTTGCCAGGCTGGAGTGCAGTGGC  
ACAATCTTGGCTCACTGCAACCTCTGCCTCCTGGGTTCAAGGGATTCTCCTGACTCAGCC  
TCC

>5412 len=123 tot-seq=1

AGCTGGAGAAGAGCTTGAGGCCTTGGCTGGGCACCCAGGAGCCCCCTGGTCCAGGCCAGC  
CCTGGGACTCCAAGAGGCCATGCTCTGCCTTGGGACCAGAGAGCCACGTGGGGCATTGAC  
AGG

>5413 len=123 tot-seq=1

AACGCCGCGTGAGTGAAGAAGGTTGTCGGATCGTAAAGCTCTGTTGGAAGAGAAGAACGT  
GTGTGAGAGTGGAAAGTTCAAACAGTGACGGTAACTACCAGAAAGGGACGGCGAACGAC  
GTG

>5414 len=123 tot-seq=1

ACCAGCCAAGTAGCGTGACAGGATGACGGCCCTATGGGTTGTAACTGCTTTTGTGTTGAGA  
ATAAAGGGCAGTACGTGTAATGTTTTGCATGTACCATTGAATAAGGACCGGCTAATTCC  
GTG

>5415 len=124 tot-seq=1

CGCCTCCTGGCGACAAAAGTGTATGCGCCGCGTGGGAAATCTCCAGAGTTAAATCAGGAC  
GGGGTGGAGCAGAGCTGAGGAGAGCAGGTTCTGGCAGAATCCGTGGCCAATCCTGGCTG  
AGCT

>5416 len=124 tot-seq=1

CCACTGTTGTGGCCAGTAAATTCCTTTATTTTGTATCTATTAATTTAATGTGAATC  
ATTCGACGCTAGTGTGGCCATAACAGCAAAGAGAAGGTAAATTGGTTCAGAGAGGCTCTT  
TCTG

>5417 len=124 tot-seq=1

AGAAAGAGCTTGGTGGCGCTAGGGCGTCCTTGTGGATGTGACAGGGAAGAACAGTTTGGGA

ATTTTTCCCCGTTTCATTGCCTGGTGATGAGAGCCAGAAGGGATGCATGCCTTCTACA  
CTTG

>5418 len=124 tot-seq=1

AGGAGGAGCAGGAGGAGGAGGAGGAGGAGGAGGAGGAGCAGGAGGAGCAGGAGGAGGAGG  
AGGAGGAGGAGGAGGAGGAGCAGGAGGAGCAGCAGGAGGAGGAGCAGGAGGAGGAGGATCAGG  
AGGA

>5419 len=124 tot-seq=1

CAGAGCTAACTGCCCTTTTATACCTGGGCTCTGTTTCATCTTCATTGGGAAACAGGTCATC  
CAGGGAGTCTTTGGGGACATCACCTTCTCCTCTGGAAGGAAGACAGGAATGATTGTC  
AGCC

>5420 len=124 tot-seq=1

CCACAGCCGGGCTCTTTGACCAGCTCACAGCCCAGAGGGCTGGGGGGACACATGGACAGA  
GCTTTCTCGTCGCAGGGTTCACAATGCACGAAAGAACCCAGGCCTTGAGCCGGTACGGCA  
TAGG

>5421 len=124 tot-seq=1

GGCAACCAATGAGCCACTACACTGGCTTGAAATTAAGTTCTAAGAAAGTTAAAAGGGG  
GCTGAGGAATGGCTCAGTGGGTGAGAGCACTGACTGCTCTCCAGATGGGCCTGAGTTCA  
ATTC

>5422 len=124 tot-seq=1

GCAGGTGAATTTCTGAGTTTGAGGCCAGGCTGGTCTACAAAGTGAATTCCAGGACAGTCA  
GGGCTACACAGAGAAACCCTGTCTCGAAAAACCAACCCCCAAAAGAAAGACTCCAAA  
ACAA

>5423 len=124 tot-seq=1

GATGCCCAGCGTCTGCGGGGGCCACCTGGGGGGTGAGTCCTCTGGCCCCAGTCACGCCTT  
CAGATGACCGCAGTCCCGGCTGACATCCTGAGTGTAACCTTTATGAGAGGCAAGAGAAGCC  
AGGA

>5424 len=124 tot-seq=1

CGGCAATGGACGGAAGTCTGACCGAGCAACGCCGCGTGAACGAAGAAGTACCTCGGTATG  
TAAAGTTCTATCAGCAGGGAAGAAAATGACGGTACCTGACTAAGAAGCCCCGGCTAACTA

CGTG

>5425 len=124 tot-seq=1

TGTTGTCAGTGAGCTAAACCCTCTCTCCAGGGCAGGAAGTCAATGGACAACATCGAAA  
CCCGATACATCAAGAAACAGCAATAGAATAGCATTTCAGGACTTCATGGCAACCCAGAA  
CCAG

>5426 len=124 tot-seq=1

TAGGGAATCTCCACAATGGACGCAAGTCTGATGGAGCAACGCCGCGTGAGTGAAGAAGG  
GTTTCGGCTCGTAACTGGCCTTTATTTGACGGTAATCAACCAGAAAGTCACGGCTAACTA  
CGTG

>5427 len=124 tot-seq=1

ATAGATGATTGGCTATTTCTTTACCTACTGTTTTGCCTAATTAGCATTTTAGTGAGCTC  
TCTGATTTGTTGGGTGTGAGCTAAGTTGCAAGCCCTGTGTTAAAGGTGGATGCAGTCAC  
CTTC

>5428 len=124 tot-seq=1

GCACAATGGGGGAAACCCTGATGCAGCGAAGCCGAGTGAGCGAAGAAGGCCCTTCGGGTTG  
TAAAGCTATGTTAGATGGGAAGATAATGACGGTACCATAAGAAAAAGCCCCGGCTAACTA  
CATG

>5429 len=124 tot-seq=1

GCAACGCCGCGTGAGTGAAGAAGTGTTCGGCTCATAAACTCTGTTGTTGGTGAAGAAG  
GGCGGGGGTAGTAACTGACCTTTGTTTGACGGTAATCAATTAGAAAGTCACGGCTAACTA  
CGTG

>5430 len=124 tot-seq=1

GATGCAGCGACGCCGCGTGAGCGAAGAAGTATTCGGTATGTAACTGCTTTTATGTGGG  
GATAAAGTGCCTGACGTGTCATGCATTGCAGGTACCACATGAATAAGGACCCGGCTAATTC  
CGTG

>5431 len=124 tot-seq=1

TTGTTTTGACTGTGAGATTCTGATGGGTTAAATTGAAACATGGCAGGTTAGAATGAATCA  
GACAGACCTATTTGGTTTTGTTTTATGTGACCCCTGAATTGGGTTATGAGTACAATTAGA  
AACC

>5432 len=124 tot-seq=1

GACAGGGTGGTCACGCTCACCTGCGTGATCGTTTCAAGGAACGGGCGCAGATAGGTGAAG  
ACGGCGAACTGGCCCATGAACAACAGCATGATTGCGAGCATTCCAATTGCGACCTGAGAA  
TTGC

>5433 len=124 tot-seq=1

AGGAGAGGGAAGGAGGGAGAGTGAAACAATAATTCTTGGTAGTAACACAGTCATTCGTTA  
AGCATTTACTCAGTGCTGGACGTGGAGCTAAGCACATCCCAGCCCTCAGCTCTTTTAAAA  
AGCT

>5434 len=124 tot-seq=1

GTAACAGGCATTGTTATCTAGCATTTGACGGTGCTCATTTAGACAAAGAGAATGAGGCT  
CAGATAAATTAAGTAACTTTCTTAAATCACAGAGCCACTAAGTAATGAAGTGTGAATTCA  
AACC

>5435 len=124 tot-seq=1

CCCTTATTATAAAAAGAGAAAATAGCGACACACACATACACACACACTCACGGAGAATG  
CCACGTGACAATGGAGACAGGGATTGCAGTGATGTTGCTACAAGCCAAGAAACACCCAGG  
ATCG

>5436 len=124 tot-seq=1

AACCAGCCAAGTAGCGTGCAGGACGACGGCCCTATGGGTTGTAACTGCTTTTATGCGGT  
GATAACCGGCATCACGTGTGAGGCCATGCAGGTACCGCATGAATAAGGACCGGCTAACTC  
CGTG

>5437 len=124 tot-seq=1

TGGGGAATCTTACACAATGGACGCACGCCTGATGGAGCAACGCCGCATGAGTGAAGAAGG  
GTTTCGGATCGTAAAGCTCTGTTGTTGGTGAAGAAGGATAGCGGTAGTAACTGGCCTTTA  
TTTG

>5438 len=124 tot-seq=1

GAACCAGCCAAGCCGCGTGAGGGATGAAGGTACAGAGTATCGTAAACCTCTTTTGTGAGG  
GGACAAAGGCGGGATGTGTCCCCGGATGAGTGTACCTGAAGAAAAAGCATCGGCTAACTC  
CGTG

>5439 len=124 tot-seq=1

GCAACGCCGCGTGAGTGAAGAAGTGTCTCGGCTCGGAAAGCTCTGTTTGTAGTGAAGAAA  
GATAGAGGGAGGAACGTGCCTTTATTTGACGGTAATTACTGAGAAAGGCACGGCTAACTA  
CGTG

>5440 len=125 tot-seq=1

GAACCAGCCAAGCCGCGTGAGGAAGGAAGGTACAGAGTATCGTAAACCTCTTTTGGCAGG  
GAACAAAGACTGGGACGCGTCCCCGGATGAGTGTACCTGAAGAAAAAGCATCGGCTAACT  
CCGTG

>5441 len=125 tot-seq=1

CAATGGGGACTCGGTGGCCTGAGTAACCGCCTGGCTGCTGCCAGGCAGCCGGCTGTAGA  
AGAGCTTGCCAGCGCTCCTGATCCTCAGCTTAGTGGTCCCGATCTGAAGCAGGGGCAT  
CACAG

>5442 len=125 tot-seq=1

CAGGGCATTCTGGGACTGTAGGAGGCAGTTTCTGAAGTAAAAGCTTGGCCATGGGCTTGG  
TGCTGTGAGCCAGCCAAGAAGAGTCTGGTTATCAAAACCTCAGCAGGCTCCTACGTGTG  
AAGTG

>5443 len=125 tot-seq=1

TCGGTCCGAGCTGCAGGTGTCGCCAGGCTTTGTTCCGCCAGGGCCTGGCCTGATGCTGG  
AGAGGCAGCTGGCAGGAGCCCTGCCTGCCCGAGATGACCCCTCCCATCGAGTCCATAG  
AAGTG

>5444 len=125 tot-seq=1

AGCATGAGCTCTGGGTACCTTGGGCATGAACTGGGGGGAAAGTCCCACAGTCCCCAGAGG  
ACTCTCCACTCGATCTTAGGATCACTGGAGAGTGAAAAACAACATCTGTTCCAATTGTGA  
CAGGC

>5445 len=125 tot-seq=1

AGCAACGCCGCGTGAGTGAAGAAGGGTTTCGGCTCTTAAAGCTCTGTTGTTGTTGAAGAA  
GGACAGAGGTAGTAACTGACCTTTTCTTGACGGTAATCAATTAGAAAGTCACGGCTAACT  
ACGTG

>5446 len=125 tot-seq=1

GAAGCATTTCCACTCTTGTTTTTTTTTTGTTGTTGTTTTTTCTGACACTTTCTTTT

CCCTTGGCTTCTCTGACAATTGGAGATGCAAGAGTGGATACAGCCATACCAATGAGAAGG  
TGATT

>5447 len=125 tot-seq=1

CAGCGACGCCGCGTGATTTAGAAGGCCTTCGGATCGTAAAGCTCTGTTGTTGGTGAAGAA  
GGATAGAGGTAGTAACTGGCCTTTATTTGACGGTAATCAACCAGAAAAGTCACGGCTAACT  
ACGTG

>5448 len=125 tot-seq=1

AGCACCGCCGCTTGAGTGAAGAAGGGTTTTCGGCTCGTAAAACCTCTGTTGTTGGTGAAGAA  
GTACAGGGGTAGTAACTGCCCTTTGTTGACGGTAATCAATTAGAAAAGTCACGGCTAACT  
ACGTG

>5449 len=125 tot-seq=1

AGCAACGCCGCGTGAGTGAAGAAGGTTTTCGGATCTGAAAGCTCGGTTGTTGGTGAAGAA  
GGATAGAGGTATTAATGGCCTTTATTTGACGGTAATCAACCAGAAAAGTCACGGCTAACT  
ACGTG

>5450 len=125 tot-seq=1

CAATGGGCGCAAGCCTGATGGAGCAACACCGCGTGAGTGAAGAAGGGTTTTCGGCTCGTAA  
AACTCTGTTGTTGAAGAAGAAGCTGCGTGAGAGTACCTTTCGAATAAGCGCCGGCTAACT  
ACGTG

>5451 len=125 tot-seq=1

GAGAATCGCTTGAACCAGGTAGGCAGAGGTTGCAGTGAGCTGAAATTGCCCCACTGCATT  
CCAGCCTGGGTGACAGAGAAAGACCCTGTCTTAAAAATAACAATAATAAATTCATAAG  
AAAAC

>5452 len=125 tot-seq=1

AATGGGCGAAAGCCTGATGCAGCGACGCCGCGTGAGGGATGAAGGAATTAGGGTTGTAAA  
AATATTTAAGAAGGGAAGAAGAGAAAAGTGACGGTACCTGCAGAAGAAGCACCGGCTAACT  
ACGTG

>5453 len=125 tot-seq=1

GGACTCGGTGGGAGGGGGTCTAGGGAACAAAGAGAAAATGGATCCGGAGCCGAGGACTCA  
CCCGCAGCTCCACCCGCACCCAGCTGTTAGAACCGTTACAAGATTCCAGAAGGACCGAGT

CTTTG

>5454 len=125 tot-seq=1

AGCCATGCCGCGTGTATGAAGAAGGCCTTCGGGTTGTAAAGGACTTTCAGCGGGGAGGAA  
GGGAGTAAAGTGTATAACTTGGCTCATTGACGTTACCCGCAGAAGAAGCACCGGCTAACT  
CCGTG

>5455 len=125 tot-seq=1

GCAATGCCGCGTGAAGGAAGAAGGTCCTCTGGATTGTAACTTCTGTTGTAAGGGAAAAA  
CGACCTATGTAGGAAATGACAGAGGAGTGATGGTACCTTACGAGAAAGCTCCGGCTAACT  
ACGTG

>5456 len=125 tot-seq=1

TGGACAATGGGGGCAACCCTGATCCAGCCATGCCGCGTGAGTGAAGAAGGCCTTCGGGTT  
GTAAAGCTCTTTCGGCGGGGACGATGATGACGGTACCCGCATAAGAAGCCCCGGCAAAC  
TCGTG

>5457 len=125 tot-seq=1

AGCAAGTTTAGTGCAGTGAGAGCAGCATCATTCTGAGGAAGAGCCAGTGGCCAACAAAG  
GCGAGGAAAAAAGACAATGAGAACATTCCAATAGAGACAGAGGAGACACGCCTTGAAG  
AAACA

>5458 len=125 tot-seq=1

AAGATAAGCAGAGCCTGGGCAGACCCCTGGCCCCAGAATGGGACTCTCCCTGGGCTGGC  
CAGACTCAGCAAGGAGCAGGCAGGCCCCCTCCTCTTCTGTGGTCTAGAAATCCCAGGCT  
GAGCC

>5459 len=125 tot-seq=1

AGCAACGCCGCGTGAATGAAGAAGGTTTCGGCTCGTAAAGCTCTGTTGGTGGTGAAGAA  
GGACAGGGGTAGTAACTGACCTTTATTTGACGGTAATCAATTAAGAAGTCACGGCTAACT  
ACGTG

>5460 len=125 tot-seq=1

GAACTTACAGACCTTAGAACCCCTCCACTAGACAGTGTGAGACTTGTGCTTCAGGGGC  
TCAGAACACACAACATGTTTCGTCACTTCAACCCTAAGAACAAGCAAAGACATTGAAAAA  
AAGTA



>5461 len=125 tot-seq=1

TGCACAATGGGGGAAACCCTGATGCAGCGACGCCCGTGAACGAAGAAGGTATTCGTATC  
GTAAAGTTCTGTTCTATGGGAAGATAATGACGGTACCATAACAAGAAAGCGCCGGCTAAAT  
ACGTG

>5462 len=125 tot-seq=1

AGCAGAGGGGCTCCCTCCATGGAGGGCAGAAGTGTGGTCCGGGGTGAGGGACGCAGGCAG  
GGGCCCCCTGAGGCAGGCCAGGCTGTCTGCTGAAAGGTGGGGCCCTCCACACGCTGCCC  
ACCCC

>5463 len=125 tot-seq=1

GCGATTGTTTTGATTCCGGAAATAGCTCTGACGTATCAGACGGTCATGCGTTTTTACCGA  
AGATTTGGGGAGAGGATTTCCATCATGAACTCCAGGCTTTCGGCAGGGGAACGTTTTGAT  
CAGTT

>5464 len=125 tot-seq=1

TGCACAATGGGCGAAAGCCTGATGCAGCGATGCCCGTGAGCGAAGAAGTATTCGGTAT  
GTAAATCTCTATCAGAAGGGAATAAAATGACTGTACCTACTAAGAAGCTCCGGCTAAAT  
ACGTG

>5465 len=125 tot-seq=1

GAACCAGCCAAGTCGCGTGAGGGAAGACGGCCCTACGGGTTGTAAACCTCTTTTGCCGGG  
GAACAAAGGCGGCCACGCGTGGCCGGATGAGCGTACCCGGAGAAAAAGCATCGGCTAACT  
CCGTG

>5466 len=125 tot-seq=1

GCAACGCCCGTGAGTGAAGAAGTTTTCGGAGCGTAAAGCTCTGTTGTAAGAGAAGAAC  
TTGTGTGAGAGTGAAAGTTCACGGGGTGACGGTAACTACCAGAAAGGGACGGCTAACT  
ACGTG

>5467 len=125 tot-seq=1

CGGGGAGTATTGCACAATGGGGGAAACCCTGATGCAGCGACGCCCGTGAGTGAAGAAGT  
TATTCGTAACGTAAAGCTCTATCAGCAGGGAAGAAAATGACGGTACCTGACTAAGAAGCC  
CCGGC

>5468 len=125 tot-seq=1

TGGCTATGAGGAAGCAGAGAAAATTAATTTGGTAGAGACAGCATTAGAGAGTGCCCTCCA  
AGAAGAAGGGTCTTGAGGAGGAAAAGAAATAGCCAGCAGCCGGTAATCACAAAGATCGGA  
AGAGC

>5469 len=126 tot-seq=1

GTGGGAGGAAAACCTTCCAAGAGACCAGCATTGCGTGGGGAGTGTCTGGGCGGTGGGTAA  
GGCAGGAGCAGGTTAGCAAAGCCTGAGAGAGACAAGCAGCGGCTTCAGCTGGGCCGGGCT  
GGGGGT

>5470 len=126 tot-seq=1

TGGGAATATTGGGCAATGGGCGCAAGCCTGACCCAGCAACGCCGCGTGGAGGAAGAAGG  
TCTTCGGATTGTAACTCCTGTTGTTGAGGAAGATAATGACGGTACTCAACAAGGAAGTG  
ACGGCT

>5471 len=126 tot-seq=1

CTGACAACTGGGTAACATTTCTCAAGCTCCAGAGCTTTCTCCAGAAAACAAGCATCAGT  
AAACTCCACATGACAGAGAATGCCAGGGTTCTTCAATCCCATATCCTCCCAGGGAGGACT  
GAGACC

>5472 len=126 tot-seq=1

TGAGGAATAGGGGTCAATGGAGGAAAGTCTGAACCAGACAAGTAGCGGGCAGGATGACGG  
CCCTATGGGGTGTAACCTGCTTTTATATGGGGATAAAGTGGGGAACGTGTTCCCTTTTGC  
AGGTAC

>5473 len=126 tot-seq=1

TGGGAATGGGGCACAATGGGGGAAACCCTGATGAAGAGACGCTGCGGGATTTAGAAGGC  
CTTCGGGTTGTAAAAATCTTTTGTATGGGAAGAAAATGACAGTACCATACGAATAAGGAC  
CGGCTA

>5474 len=126 tot-seq=1

TAGGGAATCTCCACAATGGGCGAAAGCCTGATGGAGCAACGCCGCGTGAACGATGAAGG  
TCTTCGGATCGTAAAGCTCTGTTGCAGGAGAAGATAATGACGGTACCCTGCTAGGAAGCC  
CCGGCT

>5475 len=126 tot-seq=1

GAGCAACGCCGCGTGAGTGATGAAGGGTTTCGGCTCGTAAACTCTGTTGTCAGGGAAGA

ACGTCCCCGTGAGTAACTGCACGGGGAGTGACGGTACCTGACCAGAAAGCCACGGCTAAC  
TACGTG

>5476 len=126 tot-seq=1

TTCCCCCTCCAGGACTTCCTATACCTCACACTCCTGGAGTGCAATGCCTTATCTCAGAC  
AATAGTGAGCTCAATATGCCTGTGCTATGTCAGGGTATGGCACCATCAGCTACCCAGTTG  
TCCAAA

>5477 len=126 tot-seq=1

GAGCAACGCCGCGTGAGTGAAGAAGGATTCGGTTCGTAAACTATGTTGTTAGAGAAGA  
AAAGAGAATAGAGTAAATGTTATGCGTGTGACGGTATCTAACCAGAAAGCCACGGCTAAC  
TACGTG

>5478 len=126 tot-seq=1

GAGCAACGCCGCGTGAGTGAAGAAGGGTTTCGGGTCGTAAACTCTGTTAGTAGTGAAGA  
AAGATAGTAGTAGTAACTGGCCTTTATTTGACGGTAATTAAGTAAAGTACACGGCTAAC  
TACGTG

>5479 len=126 tot-seq=1

TGAACCAGCCAAGTAGCGTGAAGGATGACGGCCCTATGGGTTGTAAACTGCTTTTATACG  
GGGATAAAGTGCCTGACGTGTCATGCATTGCAGGTACCTTATGAATAAGGACCGGCTAAC  
TCCGTG

>5480 len=126 tot-seq=1

CAGCCAAGTCGCGTGAGGGAAGACGGGTTTCGGCTCGTAAAGCTCTGTTGGTAGTGAAGA  
AAGATAGAGGTAGTAACTGGCCTTTATTTGACGGTAATTAAGTAAAGTACACGGCTAAC  
TACGTG

>5481 len=126 tot-seq=1

GACCTGGGCTTGTGCCCTTGTCACCTTCTGTATGAAGCCAGGAGGATGAAGCTTGATGAT  
ATCTCCTGTAGCGATTGAAGGGGAGTTGACAGGTATAAATTGGCCTGAGCAGGAATCTCA  
CTATTT

>5482 len=126 tot-seq=1

TGGGCAATGGGGGAAACCCTGACCCAGCGACGCCGCGTGAGTGAAGAAGTATTTCCGGTAT  
GTAAAGCTCTATCAGCAGGAACGAGAAAAGACGGTACCTGACTAAGAAGCCCCGGCTAAC

TACGTG

>5483 len=126 tot-seq=1

GCTGTGACCGTCTGTTCTGCCGGGAGGCAGGCCTCATTCTCGATGAGGTAAAACCCAGG  
CCATGGAGACGGCCATGGAGCCAGGGACAGCACCAACTCAAGACTCACGTAAGAGACTAG  
CATCCT

>5484 len=126 tot-seq=1

GCAAAGAGAGAATGAGAGAAAAGTGAAAGCGGAAACCCCTTATAAAACCATCAGATCTCA  
TGAGATTTATTCACTACCATGAGAACAGTATGGGGGAAACCACCCCATGATTCAATTAT  
CTCCCA

>5485 len=126 tot-seq=1

GGCTCACGACATGTAGGCATTCAAAGATCACCTCCAGGCACCCACAGGCCCTTGTGAAT  
TTCCACTAAAAGCAACCTTTGTGCCATTTGCTCAGGACTCTGCAGGTCCAAGGGATTGT  
TTAGAA

>5486 len=126 tot-seq=1

GTTTGGGGTGGGGCTGGGTATCTGATGTTTACTCAGACCTCCTCATCCTCATCCTGCAGG  
TGGGCAGATGCTTGGTTGAGGGAAGAGTGCCCCACCTCGCCCCTCACTTTCTAGGCAG  
AATCAT

>5487 len=126 tot-seq=1

CAGCGACGCCGCGTGCGGGATGAAGGATTCGGTTCGTAAACTCTGTTGTTAGAGAAGA  
ACAGCGCATAGAGTAACTGTTATGCGTGTGACGGTATCTTACCAGAAAGGGACGGCTAAC  
TACGTG

>5488 len=126 tot-seq=1

GGGCACAAGGGGGGAAACCCGGAGGCAGCGACGCCGCGTGAGCGAAGAAGGCTTGCGAGG  
CGGAAAGCTCTGTCCTATGAGAAGATAATGACGGTATCATAGGAGGAAGCCCTGGCTAAA  
TACGTG

>5489 len=126 tot-seq=1

TGACGAACAGCAGCACGGTGATCAGCGCATCGCTCGCCAGATCGTAAAAGTGTCCGATCT  
TGCTCGATTTGCCGCTAATTCTGGCTAATTCGCCATCGGTATGGTCAACGAAATTCGAGA  
TCACGA

>5490 len=126 tot-seq=1

CAATGGAGATGGGAGGAGAGCCAGAGGATGGCATGCAGGCTTAATCCTGCAGAGGCTCTG  
CAGTGCGGGCGAGGCCTGGGGCTTGGTCTCACGTCTCCACGGGCTCGAAGGGAAACTCTC  
CTGATG

>5491 len=126 tot-seq=1

TGAACCAGCCAAGTAGCGTGCAGGACGACGGCCCGATGGGTGGTAAACTGCTTTTATGTG  
GGGATAAAGTGCGGGACGTGTCATGCAGTGCAGGTACCACATGAATAAGGACCGGCTAAT  
TCCGTG

>5492 len=126 tot-seq=1

GAGCAACGCCCGTGAAGTGAAGAAGGGTTTCGGCTCGTAAAGCTCTGTTGTTGGAGAAGA  
ACAAGCTTGATAGTAACTGTTCAACCAGTGACGGTATCTAACCAGAAAGTACGGCTAAC  
TACGTG

>5493 len=126 tot-seq=1

CCCTGACGCAGCGACGCCCGTGCGGGATGAAGGCCTTCGGTATGTAAAGCTCTATCAGC  
AGGGAAGAAAGGTGCCCTTGGGCGCCTGGACGGTACCTGACTAAGAAGCCCCGGCTAAC  
TACGTG

>5494 len=126 tot-seq=1

GAGCAACGCCCGTGAAGTGAAGAAGGGTTTCGGCTCGTAAAGCTCTGTTGTTAGTGAAGA  
AAAATAGAGATAGTAACTGGTCGTAATTTGACGGTAATTAAGTAAAGGCACGGCTAAC  
TACGTG

>5495 len=126 tot-seq=1

CAGTGTCTGGAATCCTGTGTGAGGAACAATCATTAGACTCGTAGCTGTGTTCTGGA  
ATTCCGTGTGATGGACGAACATTCACACCCTCGGAGCAGTGTCTGGAATCCTATAAAGG  
GACAAA

>5496 len=127 tot-seq=1

AGAGTCCAGGGTGGCAGAGGAATATCTATGGCCTGGAGGCTTGGCACAAGGACTCTGGAA  
TCCACTGGTGCCAGATTGGACAAGTTATGCAACACCCGGGCTGAGTTCATTTTTTTGTAA  
AGTAGGG

>5497 len=127 tot-seq=1

GCAGCCATGCCGCGTGTATGAAGAAGTCCTTCGGGTTGTAAATTACTTTCAACCCGGAGG  
AAGATAGTCAAGTTAATACCTTTGCTCATTGACGTTACCCGCAGAAGAAGCACCGGCTAA  
CTCCGTG

>5498 len=127 tot-seq=1

GTTGATCCACGCCCAAACACTTGACAGATACACCAGCAGTCCAATTTGGTAGAGCTGGGA  
TAGCAAACACGAATCAGCAGCCGAGGCACTGACTAGCAGAGCCAACCTCGGACTCAGCCTC  
AGCAGTG

>5499 len=127 tot-seq=1

GGAGCAACGCCGCGTGAGGGAAGAAGGGTTGCGGCTCGTAAAGCTCTGTTGTTGGGGAAG  
AAGGACAGGGGGAGGAACTGACCGGGGGTGACGGTAATCAATGAGAAAAGTCACGGCTAA  
CTACGTG

>5500 len=127 tot-seq=1

CCAGCAATGCCGCGTGAGTGAAGAAGGCCTTCAGGTTGTAAAGCTCTTTTGTGAGGGAAG  
AAACGGCTGAGGTTAATACCTTCGGCTAATGACGGTACCTGAAGAATAAGCACCGGCTAA  
CTACGTG

>5501 len=127 tot-seq=1

GATGGAGCAACGCCGCGTGAGTGAAGGGTTTCGGCTCGTAAAGCTCTGTTGTTGGTGAAG  
AAGGACAGGGGTAGTAACTGGCCTTTGTTTGGCGTAATCAATTAGAAAAGTCACGGCTAA  
CTACGTG

>5502 len=127 tot-seq=1

GGAGCAACGCCGCGTGAGTGAAGAAGGGTTTCGGCTCGTAAAGCTCTGTTGTTAGAGGAG  
AACGTGCGGGAGAGCAACTGTTACGGAGTGACGGTAACTAACCAGAAAAGTCACGGCTAA  
CTACGTG

>5503 len=127 tot-seq=1

GAGTTTTTTTTTTTTTCGTGAGGATGAAGCGTGAGTTGATGTACATAGAACCAGGGTAGG  
TCTCTGATAAGGCAGGTGAGTGGCTTGTGTGGAGCATCATACTCCAGCCCACACCTGGCA  
GTGGGCA

>5504 len=127 tot-seq=1

GGGCAATGGAGGCAACTCTGACCCAGCAACGCCGCGTGAAGGATGAAGGTTCTCGGATTG

TAAACTTCTGTATTAGAGGAAGAAGATAGTGACGGTACTCTAATAGAAAAGCTACGGCAA  
CTACGTG

>5505 len=127 tot-seq=1

TAGGGAATCTTCCACAATGGACGCAAGTCTGATGGAGCAACGCCGCGTGAGTGAAGAAGG  
GTTTCGGCTCGTAGTAACTGACCTTTGTTTGACGGTAATCAATTAGAAAAGTCACGGCTAA  
CTACGTG

>5506 len=127 tot-seq=1

GGAGCAACGCCGCGTGAGTGAAGAAGGGTTTCGGCTCGTAAACCTCTGTTATAAGTGAAG  
AAGGGCGGGGGTAGTAACTGACCTTTGTTTGACGGTAATCAATTAGAAAAGTCACGGCTAA  
CTACGTG

>5507 len=127 tot-seq=1

TGGGGAATATTGCACAATGGGCGAAAAGCCTGACGCCGCGTGAGCGAAGAAGTATTTCCGGT  
ATGTAAAGCTCTATCAGAAGGGAAGAAAATGACGGTACCTTACTAAGAAGCTCCGGCTAA  
ATACGTG

>5508 len=127 tot-seq=1

CTGAACCAGCCAAGCCGCGTGAAGGATGAAGGTACAGAGTATCGTAAACCTCTTTTGTCA  
GGGAACAAAGGCGGGGACGCGTCCCCGGATGAGTGTACCGTAAGAAAAAGCATCGGCTAA  
CTCCGTG

>5509 len=127 tot-seq=1

TCCCAGCGGTCCTAGGCTGTCGGGAAACTGCAGCCCAGCCTCAGGGCCATGGGAGGTGGT  
ATCCAGGCCTGGGTGGGGCCAGGCCTCTGCTCACAGGGATGTGGGGTCAGTGCTTGGGAG  
CCTGTGG

>5510 len=127 tot-seq=1

TGGACCCGATCCCTCGTTCTTGTTACCTGGGTAGCAACCGCAGCTGCTTCTCAAAGGT  
AAGCCCTCAATCTTGACCACCAAAAAGCATCAAGGAGCTGAAGCCCAAGGAAATGCAGTC  
TGCTATG

>5511 len=127 tot-seq=1

CAGATTTCTGGAATCCTATGTGAGGGACAAAGATTGAGAACCCCGTAGAAGTGTTCTGAA  
ATCATATGTGAGGGACAAACTCCAGACCCCAGCAGCGGTAATACACAGATCGGAAGAGC

GTCGTGT

>5512 len=127 tot-seq=1

GGAGCAACGCCGCGTGAATGAAGAAGGGTTTCGGCTCGTAAAGCTCTGTTATTAGTGAGG  
AAGGACAAGAGTAGTAACTGACCTTTGTTTGACGGTAATCAATTAGAAAAGTCACGGCTAA  
CTACGTG

>5513 len=127 tot-seq=1

GGAGAAAAGAAGAGTGAGTGAAGAAGGAATTAGGGTTGTAAAGATATGTGATTAGGGAAG  
AAAGGATATATGTGAATAATATATGGAAATGACGGTACCGAAAAAGCAAGCCACGGCTAA  
CTACGTG

>5514 len=127 tot-seq=1

TAACTCGGCAGACTTAAATGTCCCTGTCTGACAGCTTTGAGGAGAGCAGTGGTTCTCTC  
AGCATGCAGCTGGAGATCTGAGAATGGGCAGACTGCCTCCTCAAGTGGATCCCTGACCCC  
TGATCCC

>5515 len=127 tot-seq=1

CCTGTAGGTCGTGTCTAAAAACATGAGCGTGGATGAGCTTCCAGGGATGAGTGAGGAT  
AAGAAGAGGAGGCACATTGAGTCCTGGAGCTGTTGCTGTGTGTAGAGCTTGAAGAGATGA  
GGAAGAA

>5516 len=127 tot-seq=1

ATTGCACAATGGGGGAAACCCTGATGCAGCGACGCCGCGTGAGCGAAGAAGGCTCTCGAG  
TCGTAAAGCTCTATCCTATGAGAAGAAAATGACGGTATCATAGGAAGAAGCCCTGGCTAA  
ATACGTG

>5517 len=127 tot-seq=1

GGAGGCCCCAGCATTGTATGCCAACCAATGGGAGCTGCAGACAACCAATCTCCTACCTAC  
CTTTAAGTCTGACCTACATTTGTCCAGAGTATCTACACCTCTCCCATATCTTCTGAAACA  
ATGAAGC

>5518 len=127 tot-seq=1

GGACAGGCATTATGAGGCATTGGGGGAGCTGTGGGGCTGGACATTGTGAGTCACTAGCC  
TGACCTGGCTGTTTCTGGTAACCAGGTGACATAGGAAGCTTTGTGGGTATAAGCATCA  
GCCAGGG



>5519 len=127 tot-seq=1

CTGAACCAGCCAAGTAGCGTGCAGGATGACTGCCCTATGGGTTGTAACTTCTTTTATAT  
GGGAATAAAGTGGGAAACGTGTGGATTTTTGCATGTACCATATGAATAAGGACCGGCTAA  
TTCCGTG

>5520 len=127 tot-seq=1

CTGAACAAGACAAGTAGCGTGAAGGATAACGGCCCTATGGGTTGTAACTGCTTTTATAT  
GGGATAAAGTGGGAAACGTGTTCTCTTTTGCAGGTACCATATGAATAAGGACCGGCTAA  
TTCCGTG

>5521 len=127 tot-seq=1

ATTGCACAACGGGGGAAACCCTGATGCAGCGACGCCCGTGGACGATGAAGTATTTCCGGT  
ATGTAAAGCTCTATCAGCAGGGAAGAAAATGACGGTACCTGACTAAGAAGCCCCGGCTAA  
ATACGTG

>5522 len=127 tot-seq=1

CTGAACCAGCCAAGTAGCGTGCAGGATGACGGCACTATGGGTGGTAACTGCTTTTTTTT  
GGGAATAAAGGGCATTACGTGTAATGTTTTGCATGTACCATTGAATAAGGACCGGCTAA  
TTCCGTG

>5523 len=127 tot-seq=1

CTGAACCAGCCAAGTAGCGTGCAGGATGGCGGCACTATGGGTTGTAACTGCTTTTGTAT  
GGGAATAATCTGCAGTACGTGTAATGTTTTGCATGTACCATTGAATAAGGACCGGCTAA  
TTCCGTG

>5524 len=127 tot-seq=1

CTGAACCAGCCAAGTAGCGTGCAGGATGAAGGCCCTATGGGTTGTAACTTCTTTTATTT  
GGGAATAAACTACAGTATGTGTAATGTTTTGCATGTATCATACGAATAAGGACCGGCTAA  
TTCCGTG

>5525 len=127 tot-seq=1

GGAGCAACGCCCGTGTGAGTGAAGAAGGTTCTCGGGTCGTAAAGCTCTGTTGTTGGTGAAG  
AAGGATAGATGTAGTAACGGGCCTTTATTTGACGGTAATCATCGAGAAAGTCACGGCTAA  
CTACGTG

>5526 len=127 tot-seq=1

GGAGCAACGCCGCGTGAGTGAAGAAGGTTTTCGGATCGTAAACTCTGTTGTTGGTGAAG  
AACGATAGAGATAGTAACTGTCCTTTATTTGACGGTAACCAACCAGAAAGTCACGGCTAA  
CTACGTG

>5527 len=127 tot-seq=1

CTGAACCAGCCAAGTAGCGTGAAGGATGAAGGTTCTATGGATTGTAACTTCTTTTATAC  
GGGAATAAACGGATGCACGTGTGGATTGGTGCATGTACCTTATGAATAAGGATCGGCTAA  
CTCCGTG

>5528 len=127 tot-seq=1

TCAAGCAGAAGACGGCATAACGAGATTCACGAGTGACTGGAGTTCAGACGTTGCTCTCCG  
ATCTCCTTCGGGAGGCAGCAGAGCATAACGAGATTCACGAGTGACTGGAGTTCAGACGTGT  
GCTCTTC

>5529 len=128 tot-seq=1

GCAGAGGAGGGAGGGGAGCACGGGAAAGTGAAGGAGCCGGGGAATCCTGTGCCGCCCTA  
GACCACAGCACAAGGCCTTTTGGCCTGAGGCCCTACAACCCACAGCTCTCACGCTGCCT  
GCTGCTCA

>5530 len=128 tot-seq=1

TGCAGCGACGCCGCGTGAGTGAAGAAGTATTTCCGGTATGTAAAGGACTTTTGTCCGGGAA  
GAGAAGCGCGATGTTAATACCATTGCGTGCTGACGGTACCGGAAGAATAAGCACCGGCTA  
ACTACGTG

>5531 len=128 tot-seq=1

TGCCATCCCGTTTTATCTCTTTTGGAGATGTTATCTAGTAGCAGGATTGCTTGTTATA  
CCGAAGTCTGTTTTTAAGTTCTAAAGGCATCTCAATATTTTATCCACAATTGGGATATT  
CATTTGCA

>5532 len=128 tot-seq=1

CAACTTACATGGTGAGCACAAAGGGTTGGCAGAATAGAAGCTTGGGAAAAGCATCCCTTC  
TGCAGCCATCCGGTCTAAATTTGGGGTCTCTCTGGAAGGTTCTCCATTCACACCCAAGTC  
ACCCACC

>5533 len=128 tot-seq=1

CCAGCCAGGCCGCGTGTTGAAGAAGGCCTTATGGTTGTAAAGCACTTTAAGCGAAGAGG

AGGCTACTTTAGTGAATGCCTAGAGATAGTGGATGTTACTCGCAGAATAAGCACCGGCTA  
ACTCTGTG

>5534 len=128 tot-seq=1

CATGACTGAGGTGGTGGTATATATGTTTATGTTGGCTGTTTCATTCCCCTAAATGCATTT  
GACATCTCTAATTAATCCCTTTGGAGCAGTGGCTGCTGGAATTCTCAGCTCAGAACCTTG  
GCTCATGC

>5535 len=128 tot-seq=1

TGGAGCAACGCCGCGTGAGTGAAGAAGGGTTTTCGGCTCGTAAAGCTCTGTTGTTGGTGAA  
GAAGGGCAGGAGGAGTAACATACCTTTATTTGACGGTAATCAATTAGAAAGTCACGGCTA  
ACTACATG

>5536 len=128 tot-seq=1

TGGGGCATATTGCACAATGGGCGAAAGCCTGATGCAGCGACACCGCGTGAGTGAAGAAGT  
ATTTCCGGTATGTAAAGCTCTATCAGCAGGGAAGAAAATGACGGTACCTGACTAAGAAGCC  
CCGGTTTA

>5537 len=128 tot-seq=1

ACTGAACCAGCCAAGTAGCGTGAGGGATGACTGCCCTATGGGTTGTAAACCTCTTTTATA  
TGGGAATAAAAAAGATTACGTGTAGTCTATTGTATGTACCTTATGAATAAGCATCGGCTA  
ATTCCGTG

>5538 len=128 tot-seq=1

TTTGAGACCAGCCTGGCCAATATGGTGAACTCTGTCTCTACTAAAAATGCAAAAATTAG  
CTGTGCATGGTTGTGGGTGCCTGCAATCTCAGCTACTCGGGAGGCTGAAGCAGGAGAATC  
GCTTGAAC

>5539 len=128 tot-seq=1

TGACACCAGCCAGTCTGACAGGTCAGAGGATGAGGGTACTACCTGCCAGCCAGTGTA  
TGCTACTTAGAGCCCCAAGTCTGGGACAGGTGAGATCAGGAAACAGAAAGTGCAAAACC  
ACCCCGAC

>5540 len=128 tot-seq=1

TGGAGCAACGCCGCGTGAGTGAAGAAGGTTTTAGGATAGTAAAGATATGTTGTTGGTGAA  
GAAGGAGAGGGGTAGTAAATGAAATTTGTTTGAAGGTAATCAACTAGAAAGTCACGGCTA

ACTACGTG

>5541 len=128 tot-seq=1

TAGGGAATTTTTACAATGGGCGCAAGCCTTATGAAGCAATGCCGCGTGAACGATGAAGG  
TCTTATAGATCGTAAGAGCGTCGTGTAGGGAAAGAGTGTGCCAATGTGTAGATCTCGGTG  
GTCGCCGT

>5542 len=128 tot-seq=1

CAGACCATCGGCCATTTGATAGAAGGGCAATGTCTCCGACTGCATGCCGAAGAAGCGCAC  
CCGCGCTTACAGTTCAGGCTCTTCGCCAGCGCCTGATAGCGAGGCTGATCCTTATCTTT  
GCCGACCA

>5543 len=128 tot-seq=1

GCAGGAGGAGGAGAAAGAGGAGGAGGAGGAGCAGGAGGAGAAGGAGCAGGAGGAGAAGGA  
GCAGGAGGAGGAGGAGCAGGAGGAAAAGGAACAGCAGGAGCAGGGCCAGACAGCCAGGGC  
CCCTAGAC

>5544 len=128 tot-seq=1

TAGGGAATCTTCCACAATGGGCGCAAGCCTGATGGAGCAACACCGCGTGAGTGAAGAAGG  
GTTTCGGCTCGTAAACTCTGTTGTTGAAGAAGAACGTGCGTGAGAGGAAGCCCCGGCTA  
ACTACGTG

>5545 len=128 tot-seq=1

GGGAGCAACGCCGCGGGAGGGAAGAAGGGGTTCCGGATCGTAAAGCTCTGTTGTTGGTGAA  
GAAGGATAGAGGTAGTAACTGGCCTTTTTTTGACGGTAATCAACCAGAAAGCCACGGCTA  
ACTACGTG

>5546 len=128 tot-seq=1

TGCAGCGACGCCGCGTGAGGGATGGAGGCCTTCGGGTTGTAAAGTACTTTCAGCGGGGAG  
GAAGGGAGTAAAGTGAATACCTTTGCTCATTGACGTTACCCGCAGAAGAAGCGCCGGCTA  
ACTCCGTG

>5547 len=128 tot-seq=1

CCTGAACCAGCCAAGTAGCGTGAAGGATGACTGCCCTATGGGTTGTAAACTGCTTTTATA  
TGGGGATAAAGTGCCTGACGTGTCATGCATTGCAGGTACCAAATAAATAAGGACCCGGCTA  
ATTCCGTG

>5548 len=128 tot-seq=1

TGGCTATGAGGAAGCAGAGAAAATAATTTGGTAGAGACAGCATTAGAGAGTGCCCTCCA  
AGAAGAAGGGTCTTGGGGAGGAAAAGAAATAGCCAGCAGGCGGTAATCCCCAGATCGGAA  
GAGCGTCG

>5549 len=128 tot-seq=1

CCTGAACCAGCCAAGTAGCGTGCAGGATGACGGCCCTATGGGTTGTAACTGCTTTTATG  
TGGGGATAAAGTAGGTCACGTGTCATCTATTGCAGGTACCGCATGAATAAGGACCGGCTA  
ATTCCGTG

>5550 len=128 tot-seq=1

TCTGAACCAGCCAAGTAGCGTGCAGGATGGCGGCCCTATGGGTTTTAACTGCTTTTATA  
TGGTGATAAAGTGGGGAACGTGTTCCCCCTTGCAGGTACCATATGAATAAGGACCGGCTA  
ATTCCGTG

>5551 len=128 tot-seq=1

GAGGGGGAAGAAAGCACTAGGTGGCTAAGGGACTCTGGGCTCATTGACAGCCGGACAGCG  
AAAGGAACAGGGGCTGGTTCGCAGCTTGAAAGATGGAGGCGGGAAGAGAAAGAGGGGGAA  
GGTGAAG

>5552 len=128 tot-seq=1

TGCAGCCATGCTGCGGGTAGGAAGAAGGCCCTTCGGGTTGGAAAGTACTTTCAGCGGGGAG  
GAAGGGAGTAAAGTTAATACCTTTGCTCCTTGACGTTACCCGCAGAAGCTGCACCGGCTA  
ACCCCGTG

>5553 len=128 tot-seq=1

CCAGCAACGCCGCGTGAGGGATGACGGTTTTCGGATCGTAAAATACTGTTGTTAGAGAAG  
AACAAGGATGAGAAGAGAATGTTTCATCCCTTGACGGTATCTAACCAGAAAGCCACGGCTA  
ACTACGTG

>5554 len=128 tot-seq=1

CAGCAGCAGCAGCAGCAGCAGCAGCAGCAACAGCAACAGCAGCAGCAGCAGCAGCAGCAG  
CAGCAGCAGCAGCAGCAGCAGCAGCAGCAACAGGCAGTGGCAGCTGCAGCCGTTTCAGCAG  
TCAACGTC

>5555 len=128 tot-seq=1

TATTGCACAATGGGGGAAACCCGGATGCAGCGACGCCGCGTGAGTGAAGAAGTATTTTCGG  
TATGTAAAGCTTTATCAGCAGGGAAGAAAGTGACGGTACCTGAAGAAGAAGCGCCGGCTA  
ACTACGTG

>5556 len=128 tot-seq=1

TCAAGCAGAAGACGGCATAACGAGATAAGTTGGTGACTGGAGTTCAGACGTGTTCTCTTCC  
GATCTCCGACGGGAGGCAGCAGCCGGTACTGAGTTCAGACGTGTGCTCTTCCGATCTCC  
TACGGGAG

>5557 len=129 tot-seq=1

GGGAGGAGACCGTAGAGAGGAGAAAATTCAGAAGGACAGGGTCTTGCTAGGGCTGGTGGG  
CTCAGGTTGAGAGATACTGACTTGGGAACAGAAAGGGTACATTGTAACCTGAGCTTATG  
TGCCACAG

>5558 len=129 tot-seq=1

GCATCTGGGGTAGACCTTGCACAGGATAGGGCTGTTCCCTCCTGAAATGACCCTCTCTCT  
ATGGGTGCCTTCTCCATATGAGATTGTCAGTACCACCCCAACATACCGTGGTCCAAGGTG  
GTCCAGAGC

>5559 len=129 tot-seq=1

GAGAAGGGAGGGGATGCTACAGTTACACGTCATGCTTTAGAGGTTGACTGATTATCATT  
AGAATCACAGTGGAACAAGTCTCCAAGTATATGTATGAGAGATTATCTAGACCTACATG  
AACATCATT

>5560 len=129 tot-seq=1

TGACCCTGTAAAGCCCTATATACAAAGAACTTTGAAATCAAAGATTATGTACCTGCCCA  
AAGGTATAACAACCAAGTGAAGAAAGAGCGTTAACCTTGTCAAATTGTCATTAAGAACCA  
AGATACTGT

>5561 len=129 tot-seq=1

TGGGGAATAGTGCACAATGGAGGAACTCTGATGAAGAGACGCCGCGGGAAGGATGAAGT  
ATTTCCGGTAGGTAACTTCTATCAGCAGGGAAGAAAATGACGGTACCTGACTAAGAAGCC  
CCGGCTAAC

>5562 len=129 tot-seq=1

TGGAAATCCCAGGAATTGATGGACTAACAAGAGCCAGCGCCGCGTAATCCTTAGATCGG

AAGAGCGTCGTGTAGGAAAGAGTGTGCCAATGTGTAGATCTCGGTGGTCGCCGTATCATT  
AAAAAAAAA

>5563 len=129 tot-seq=1

CAATGGGCGAAAGCCTGATGGTGCGACGCCGCGTGGGGGAGGAAGGTCTTCGGATTGTAA  
ACCCCTGTCATGTGGGAGCAAGACATTTGTTTGATAGTACCACAAGAGGAAGAGACGGCA  
AACTCTGTG

>5564 len=129 tot-seq=1

CAGATGGCCAGATCAAATGGAGCCAGCAGAACCACAGGGCTCTGGAGCTGGACTCCGTGG  
CCACAGGTCATGTGGAGGGAATCTGAATGGCCTGTCAGGCCCTGCTGCCCTCTTGCTCC  
TGATAACAC

>5565 len=129 tot-seq=1

ATGGAGCAACGCCGCGTGAGTGAAGAAGGGTTTCGGCTCGTAAAGCTCTGTTGTTGGTGA  
AGAAGAACAAAAAATAACTGACCTTTGTTTGACGGTAATCAATTAGAAAGTCACGGCT  
AACTACGTG

>5566 len=129 tot-seq=1

CGGAGCAATGCCGCGTGAGTGAAGAAGGCCTTCGGGTTGTAAACTCTGTCCTTATTGAA  
GAGAGGCAGTAGTGTAATAATGCTATTGTAGGACGGTAAATAAGGAGGAAGCCCCGGCT  
AACTACGTG

>5567 len=129 tot-seq=1

TCAGGAATGGATGTGAATGCAGATGGCACCCCTGCTCCCCAGCTCTGTCCTGGCCCTGAG  
GTCCTCCTGATGCGCACCCCTCCCTACCTCCCGAATCCGAGTCATGGTAATTGGGGTCCA  
GCCCCTTGT

>5568 len=129 tot-seq=1

CAGGTCAATCAGGCCCAAGGTTAGCACCATGGACTTGAGCTGGGCAGCTACAAACTCAAT  
CCCTGCAGGGACACAAGCCAAGTCAGAACCCAAAACAGGGCAGCTGCCACAACCTACCCC  
TTGTGAGTC

>5569 len=129 tot-seq=1

ATGGAGCAACGCCGCGTGAGTGTGAAGGTTTTCGGTTTCGTAAAGCTCTGTTGTTGGTGA  
AGAAGGATAGGGGTATTA ACTGACCTTTATTTGACGGTAATCAACCAGAAAGTCACGGCT

AACTACGTG

>5570 len=129 tot-seq=1

CCGAGCAACGCCGCGTGAGTGAAGAAGGTTTTCGGATCGTAAAGCTCTGTTGTTAGAGAA  
GAACGTTTTGTGGGAGTGGAAAGTTCACCCTGTGACGGTAACTTACCAGAAAGGGACGGCT  
AACTACGTG

>5571 len=129 tot-seq=1

GAGTGAGAAGGAGGAACTGGAGTGAGAAGCAGGAGCTCCTAACAATACAGGACTCTTTTCG  
AGGCCCTGTAATTGGAATGAGTCCACTTTAAATCCTTTAACGAGGATCCATTGGAGGGCA  
AGTCTGGTG

>5572 len=129 tot-seq=1

CCCTGATGGTGCGACGTCGCGTGAGGGAAAGACGGCCCTACGGGTTGTAAACCTCTTTTGT  
CAGGGAGCAAGAGGCGGGTCGGGACCTGCTGTGAGAGTACCTGAAGAAAAAGCATCGGCT  
AACTCCGTG

>5573 len=129 tot-seq=1

CCGCCACATGATGTCCCTGCTGGTAGGAAGCGCATGCACCATCCTGCTGGGAGCGGGAGC  
ATTTTATCTGCTGGATTACATGAAAAAGCCCCTATGGGCACTACCATCAATACCATCAA  
GGAAGCCAT

>5574 len=129 tot-seq=1

CCGCAATGGGCGAAAGCCTGACGGAGCAACGCCGCGTGAGGGATGACGGCCTTCGGGTTG  
TAAACCTCTTTCAGCACGGAAGAAGCGAAAGTGACGGTACGTGCAGAAGAAGCGCCGGCT  
AACTACGTG

>5575 len=129 tot-seq=1

CCGAGCAACGCCGCGTGAGGGAAGAAGGTGTTTCGGATCGTAAAGCTCTGTTGTGAGAGAA  
GAACGAGTGTGAGAGTGGAAAGTTCACACTGTGACGGTAGCTTGCCAGAAAGGGACGGCT  
AACTACGTG

>5576 len=129 tot-seq=1

TTTTTCAAGCAGAAGACGGCATAAGATTTATCCGTGACTGGATTCAGACGTGTGCTC  
TTCCGATCTCCTACCGGAGGCAGCAGGGGGAGGAGGCTTGGAGGTGGTGGTGTGAGTCC  
TGTGATCCC



>5577 len=129 tot-seq=1

TAGGGAATCTTCCACAATGGGCGCAAGCCTGATGGAGCAACACCGCGTGAGTGAAGAAGG  
GTTTCGGGCGTGAGAGTAACTGTTACGCAGTGACGGTATCCAACCAGAAAGTCACGGCT  
AACTACGTG

>5578 len=129 tot-seq=1

AGCATGACTTCCAGGAGTAGGTCATAAAGGCAATGCAGTTCACCTTAGTTTCTTGGAT  
GGCTCACTCTGGGGGAACCCAGAGTCCATGCTGTGGGACACTCAGACAGCCCTGGGGAGA  
GACCTCCCA

>5579 len=129 tot-seq=1

AAGTGGTTGATAAGCATTATAAGCATTCAAAAAAATGCTCTACTGTCCTCGACACTGATG  
AAGAAAAATGCAAATTAAGTAGAAACAAGATGCTATTCATCAGTGGTTCTTCATGTGTA  
GTCCTGAG

>5580 len=129 tot-seq=1

ATGCATCCGGGTGCAGGGCCGCTGAAGTCTTGCTGTTTGGCAGCTCCAGCAGGGACACCC  
CCAGGACAACCCAAAGGCAACAAGAGGTCAGGGAGGGACCTCGCTTGTCTTGTTCACAGC  
TGTAGGTGG

>5581 len=129 tot-seq=1

TTTCCCTTAAGTGGGTAGAAAGAGAAAGGGGAGCAAGAGAGACGCAAGGATTGGTGTCCA  
TCTCAGAAACCGCCGAGTCTGAGACTTGCTAAAATTAGCTGCAATGCAGTTGTGCACA  
ACTGCGGGG

>5582 len=129 tot-seq=1

GCCTGAACCAGCCAAGTAGCGTGAAGGATGACTGCCCTATGGGTTGTAACTTCTTTTAT  
AGGGGAATAAAATGAGCCACGTGTGGCTTTTTGTATGTACCCTATGAATAAGGATCGGCT  
AACTCCGTG

>5583 len=129 tot-seq=1

GTGAAACCAAGCAGGTTTGCTGGTGCTGATTTTATGTATTCTCATTTTCATCAAGAGTTGT  
GTGGATGACAAAGAAGAACCTCTACCATACAGGATGTTCTTTTCTAATCAGCTTTCTCT  
GACCATTG

>5584 len=129 tot-seq=1

TTTTTTTTTTCAAGCAGAAGACGGCATAACGAGATTATTCGGTGACTGGAGTTCAGACGTG  
TGCTCTTTCGATCTCCTCCGGGAGGCAGCAGCCTGAGGGGGTTTGGTTAGCATCAGGGCT  
AGTGCAGAC

>5585 len=129 tot-seq=1

GAGGGAGGGAGGAGGCAGGTGCTAACCACAGATTGGTGAGGAGCAAAGACGCATGCTGGG  
ACCCAGGGAAGCCTTCCAGAGGGGACAAGAGTGGGTGCCCAATTCGCTGAAGCTTTG  
GAGAGAGAG

>5586 len=129 tot-seq=1

CAGTTTTGAGAAGAAGCCAGACCTCCACGCTCTGCACAACAGCCTGAGCCCGGCCTACGG  
TGGTGCTGAGTTTGCCGAGCTGCCCGGTCAGGCTGTTCCACAGACACCCACCACCCCGC  
TTCTACCA

>5587 len=129 tot-seq=1

GCCTGAACCAGCCAAGTCGCGTGAGGGATGACGGTCCTACGGATTGTAAACCGCTTTAGG  
CGGGGAGTAATGTGCGCTACGCGTAGAGTAGTGAGAGTACCCGCAGAATAAGCATCGGCT  
AACTCCGTG

>5588 len=129 tot-seq=1

CAAGCAGAAGACGGCATAACGAGATCGGTGTGTGACTGGAGTTCAGACGTGTGCTTTCCGA  
TCTCCTATGGGAGGCAGCAGGAGAGAAAGAGTCTATTCTTCCCAGGCAATTCAGATACCC  
ATCCGTGCT

>5589 len=129 tot-seq=1

CCGAGCAACGCCGCTTGAGTAAAGAAGGTTTTCGGATCGTAAAGCTCTGTTGTAAGAGAA  
GAACTTGTGTGAGAGTGAAAGTTCACACAGTGACTGTAACCTTCCAGAAAGGGACGGCT  
AACTACGTG

>5590 len=129 tot-seq=1

CCGTGCCCCGGTGCCGTACCAGAAATCACGCAGCCATGCGCTGCGGTTGCCGTCCCCGGCG  
GCAATCTTGTCAAATCGGTTTCCATATCGGCGGTGAAATCGAAATCCACCAGTCCCCGC  
AGATTTTCT

>5591 len=130 tot-seq=1

GCATCAGACCCCAGACGGTCTCAGCCTCACAGGCCCTGGCCCAGGCTCTGGTTAAGCACG

AGGGGAGATGCTGGAGGGAGACGCAGGTGATGCCTGGGGCCTACCCCGGGAGCCCCCCTT  
CCCCTGGACA

>5592 len=130 tot-seq=1

CATAAGAATTGCTTGAACCTGACAGGCAGAGGTTACAGTGAGCCGAGACTGTGCCACTGC  
ACTCCAGCCTGGGTGACAGAACGATTTTCTGTCTCAACATCTGTATGGAGGAGACTGGAG  
ATGACTGACC

>5593 len=130 tot-seq=1

GATGGAGCAACGCCGCTTGAGTGAAGAAGGGTTTCGGCTCGTAAAGCTCTGTTGGTAGTG  
AAGCAATATAGATGTAGTAACTGGCCTTTATTTGACGGTAACTACTTAGAAAGTCACGGC  
TAACTACGTG

>5594 len=130 tot-seq=1

AGAGGACCTGGGGGAGGACGAACAGAATCCGGCATGGAGGACAAGGCGGGGCCCTCCTG  
GGAAGGGAAGGGGAGAGGCCTCCCTGGTTCTGCACTGGCTACAGGCGCGTAGGCGGAGCC  
GTTTTACAAA

>5595 len=130 tot-seq=1

TGAGGAATATTGGGCAATGGAGGCAACTCTGACCCAGCCATGCCGCGTGAGTGAGAAGGT  
TTTCGAATTGTAACGCTCTTTCGGGTGTGAGGATGATGACGGTAAACACCAGAAGAAGCCC  
CGGCAAAATT

>5596 len=130 tot-seq=1

TGAGGAATATTGGTCAATGGGCGGAAGCCTGAACCAGCCAAGTAGCGTGAGGGAAGACTG  
CCCTATGGGTTGTAAACCTCTTTTGTGCGGGGATAAAGTGTGGGACGTGTCCCATATTGC  
AGGTACCGCA

>5597 len=130 tot-seq=1

AATTGGGGAGGGGCCACAAGGTGAAGGAAGCTCCTAGCTGATTTTGTAAATAACTTTAACT  
GAGCACAAACGTTCTGAGCAGAATCAGTGGGGTTGGGGATTAACGGGAAGTGCAGATAA  
GAACACAGAA

>5598 len=130 tot-seq=1

CTATTTAGGAAACAAAAATTCATTACACACATCCTTATTGATTTTCCCTCTCCTTTGCT  
TATTATTGAAATGCTTTTCCCTCCATCTCTTGAAGAACTGTGTTGCAATTACTGGAAGC

TTTGCTCACC

>5599 len=130 tot-seq=1

CTACGGGCAGCCCTGATTGTTTCGTAGACTCTGTATCTGAGAATCTCGCTTGCTAAGATTT  
ATTTGTAATCCCCAAATAAATATCTGCCCTGCTTTCGGCAACAAATTCAAGTCACCTGAC  
ACCCACTTTC

>5600 len=130 tot-seq=1

AGCCTGAACCAGCCAAGTAGCGTGCAGGATGACTGCCCTATGGGTTGTAAACTGCCTTTA  
TGCGGGGATAAAGTGCCTGACGTGTCATTTCATTGCATGTACCGCATGAATAAGGACCGGC  
TAATTCCGTG

>5601 len=130 tot-seq=1

AATATTGCACAATGGGGGAAACCCTGATGCAGCAACGCCGCGTGAGTGAAGAAGTGTTTC  
GGTACGTAAAGCTCTGTGACGAGGGAAGAAAATGACGGTACCTGACCAAGAAGCCCCGGC  
TAACTACGTG

>5602 len=130 tot-seq=1

TCTGGGATGCTCAAAGCACTGTGTATGTGCTGACTTTCAGATGCCCAAAGAATGTTAAC  
ATCTGCTCATGACGAGTGTTTTGAGAAAGTTAGCCAAAGCTGTGGCAGAACAATGCCTAG  
GAAAGTTTCA

>5603 len=130 tot-seq=1

AGATCTCCAGGTGACTGGAGTTCAGACGTGTGCTCTGCCGATCTCCTACGGGAGGAAGCA  
GTGATTAACCTTTAGCAATAAACGAAAGTTTAACTAAGCTATACTAACCCAGGGTTGGT  
CAATTCGTG

>5604 len=130 tot-seq=1

CAGACGGCAGGCGGGAGCCCAGGGTAGAAGGCTGGGGAACGGAACCGTCTGACCAGTGCA  
GGGAATGCATCTCAACACGAAGCAGGCCAAGGCGGCTCAGCTGGACTIONACTGTAACAAG  
CTCACTTCCT

>5605 len=130 tot-seq=1

CAGTGGTGGGCTGGCATGTCTATACTGCTCTGAGCACGTGCACACCCAACTGGGTTATGA  
CAGTGGCTGGGTGCAGCCACAACCTTTGCTATGCCAGCGCCGCGGTAATCCGGAGATCGG  
AAGAGCGTCG

>5606 len=130 tot-seq=1

GCCCTGGGATGGAAGGAGGGACTAGAGAAGCCCCTCCTTCTCCTGCAGGGGAACAGGACT  
CTGAACTTTGGCCAGGACACTTGAGGATGCCAGAGAACCCCAGCCTCTGAATGACCTCCT  
GTGTCTCTGT

>5607 len=130 tot-seq=1

GGTCAGCCACAGGCAACTCTCACGGCTGCATGATCTTTGATGATGAATTGTTATCAACAC  
AGGGCATGATGAAGTCCCGAGCTTCTTGCCTTATAAAATGGCCCTGATCACTTTCCAGGA  
ACATTGCTAC

>5608 len=130 tot-seq=1

AGTGAAGTCTTTAAAATACTGAAAGAAAAAAGCATCATCCTGGAAGTCTACAACCTACAA  
AAGTATCTTTCAAATGTAGGCTAAAGAGAGACTTTTTAAAAAGGGAAACAAAACAGAGA  
GAATTTATTG

>5609 len=130 tot-seq=1

GCAGACGGAGGCGAGGAGCGATTCTTGGGCATCTTACGTCCTCCGGCCCCTGAGCA  
GCTGTCTCGTTTAGGGAAAAGGTGTGTTGAGGCTGAATCTCTGTGGTCCCTCTTCCCT  
GCTCCATAC

>5610 len=130 tot-seq=1

GAGGGTCCAGGCCCTGCGGGACTCGGTAATTGGTCCCAGCCTCGCTGCTCTTGCAGCCGC  
AGGGGCTGGGCTGGTGGGATCCTGGGAGGTCTGTGCCAGGCAGTGGCTGGGAGGTCCTG  
CCATCCCGGC

>5611 len=130 tot-seq=1

CTCAGAGCTTTCTCAATTAACCACTTCAAGTGCAACAGTATGTGCCATAAGAGAAAGCCG  
CATATCCCGAATTAAGGGCTCTTGATCAAAATTTAATAAACAAAAAAGGCCTTGATTG  
GGCTTTTTTC

>5612 len=130 tot-seq=1

GCAGGACCCTGCAGAAAGGGCCGCCAGGGACATCTGTCATCCTGGCCACACTTACGTCTG  
TGGAAACTGATGGCTATAAGCCTCATAAATGTGATTTACCAGTTAAGACTCCAGCCCCG  
ATGGCACGAG

>5613 len=130 tot-seq=1

AGTCTGAACCAGCCAAGTAGCGTGAAGGATGACGGCCCTATGGGTTGTAACTGCTTTTG  
TATAAGAATAATGGGCATTACGTGTAATGTTTTGCATGTACCATTCGAATAAGGACCGGC  
TAATTCCGTG

>5614 len=130 tot-seq=1

AGTCTGAACCAGCCAAGTAGCGTGAAGGATGACGGCTCTATGGGTTGTAACTGCTTTTG  
TATGGGAATAATGGGCATTACGTGTACTGTTTTGTATGTACCATATGAATAAGGACCGGC  
TAACTCCGTG

>5615 len=131 tot-seq=1

TCTACTCACAACGTTGGTTGGGTATACTGTATGACATCCAATAGTCCTATGAGTGGGGA  
GTGAGGGTAATAGGGAAGATATAAAAAAGATGTAAGAGACAGTTATTGGAGGGCTGAAGG  
CCTATACCACA

>5616 len=131 tot-seq=1

CAAGGAATGGGCTACAACTGGGGAGTGGGGGCAGCCTGGAACAGTCAGAGTCCTACTCT  
GAAGTCTTGCAGGCAGCAGCGGAAATAAACTGTGCATCAGGATAAGGGGGCCTGGGAGTT  
TAGGGTACGTG

>5617 len=131 tot-seq=1

GATTGGGCCGAGGGGAAAAGTGTTAAGATGTCATTGGCACTACCCAGGAAGGAAATCAG  
GCCTGGTAGGAGGCTGCTCTCTCCAGCACAGATGCCCTGCTCCGCAGAGAAATGCAACCA  
ATGGCCCTGTG

>5618 len=131 tot-seq=1

AAACAGGATAATTCCAGGGCTCTTGAACATCTTCCCTGCACATTAAATCAGGAGGGCT  
GAGCTGGCTCAGAGCCTGCTTGGCCTGTGTGAAACCCTGGCTTCTCCGAACAACAGAGTT  
CTAAACCACCA

>5619 len=131 tot-seq=1

TGGGGAATATTGCACAATGGGCGCAAGCCTGATGCAGCCATGCCGCGTGTATGAAGAAGG  
CCTTCGGGTTGTAAAGTACTTTTCAGCGGGGAGGAAAAAATGACGTTACCCTCAGAAGAA  
GCACCGGCTAA

>5620 len=131 tot-seq=1

TGATGGAGCAACGCCGCGTGAGTGAAGAAGGTCTTCGGATCGTAAAGCTCTGTTGTTAGA

GAAGAAGAAGAGTAAGAGTAACTGTTAATTGGATGACGGTATCTAACCAGAAAGTCACGG  
CTAACTACGTG

>5621 len=131 tot-seq=1

ATATTACGGTGGTGAAAGAAACACCCATTGCGGTAGGTGAACGTATCTCTACAACGGCAT  
CGCCAGAAACTAATCGCATCATCCGCGAGGAAACGATGAAAGCTAGACAAGATAAAAAAC  
AAATCGTTGCA

>5622 len=131 tot-seq=1

GTTTAAGAGGCCAAAGAAGAGACCTAGAGCCAGCAAACAAGACACAGGGTTTTATTAGGG  
GCTTACATACACGGAAGAGAGTCCAATGGTGGTGGGCTGGACAAGAGAACTGCCTTATGT  
ACAGATATGGT

>5623 len=131 tot-seq=1

GTACCAGAGCCTTCTCCCTAACCCAGGTCCTCCCCACGACTGTGCCTGCACAGAACCACA  
CAGGATCCCTGTTTATCTTCAGATCTTCAGCCTCTCTTGGATGCTGGCCTTGTCTGGTTC  
TCTCCAGACAC

>5624 len=131 tot-seq=1

TGGGGAATATTGCACAATGGGGGGAACCCTGATGCAGCGACGCCGCGTGAGTGAAGAAGT  
ATTCGGTATGTAAAGCTCTGTCAGCAGGGACGAAAATGACGGTACCTGCAGAAGAAGCC  
CCGGCTAACTA

>5625 len=131 tot-seq=1

CAGTCTAATACCAAAATGAAACTGGACCCTTACCTTACACCATATACACAATGAAAAAA  
GCAAACATTAGGCCAATATCCCAATGAACATAGACATAAGAATCGTCAACAAAATAGTA  
GCAAACCTGAAT

>5626 len=131 tot-seq=1

CTGATGGAGCAACGCCGCGTGAGTGAAGAAGGGTTTTCGGCTCGTAAAGCTCTGTTGGTAG  
TGGAGACAGATAGAGGTAGTAACCGCCTTTATTTGAGGTAATTACTTAGAAAAGTCACGG  
CTAACTACGTG

>5627 len=131 tot-seq=1

TGATGGAGCAACGCCGCGTGAGTGAAGAAGGGTTTTCGGCTCGTAAACTCTGTTGTTGGT  
GAAGACGGTCAGGGGTAGTAACTGTCCTTTGTTTGACGGTAATCAATTAGAAAAGGCACGG

CTAACTACGTG

>5628 len=131 tot-seq=1

TGGGGAATATTGCGCAATGGGGGAAACCCTGACGCAGCGACGCCGCGTAATAACAAGAT  
CGGAAGAGCGTCGTGTAGGGGAGTGTGCCAATGTGTAGATCTCGGTGGTCGCCGTATCAT  
TAAAAAAAAA

>5629 len=131 tot-seq=1

ACTCAGGTATGGATTTTAGAAAGATGTCTATATGGAGAATGGATTGGAAGAAATCAAGGT  
TTATCTGTGCAAGATGAATAAAACAGGGCCCCACCCTTAAGGAGCTGAAAGTCTAAAAG  
GGGAAAAGATA

>5630 len=131 tot-seq=1

TGGCAGTTTTGAGAAGAAGCCAGACCTCCACGCTCTGCACAACAGCCTGAGCCCGGCCTA  
CGGTGGTGCTGAGTTTGCCGAGCTGCCAGCCAGGCTGTTCCACAGACGCCACCACCC  
CACTCCTCACC

>5631 len=131 tot-seq=1

GGAGGGAGAAACGACGAGGGAGTGAAGAAGGGTGGCGGCGCGTAAAGCGCGGGGGGGGGG  
GAAGAAGGACAGGGGGAGGAACTGACCTTGGTTTGACGGTAATCAATTAGAAAGTCACGG  
CTAACTACGTG

>5632 len=131 tot-seq=1

GGAGGGAGAAAAGACGCGGGAGGGAAGAAGGGGGGCGGCGGAAAGCGAGGGGGGGGGG  
GAAGAAGGACAGGGGGAGGAAACGGACCGGTGTTTGACGGTAATCAATTAGAAAGTCACGG  
CTAACTACGTG

>5633 len=131 tot-seq=1

ATACCCATAGGGAAGCCCTTCTTTCCCAAATCCCACTTGAGCAGGGCATCCTGCGAGAG  
CCGGGAAAAGGGTATGGAGAACATGAGGTTAGGGACAAGGGTTCAATTACTCTTTTGGGA  
TGGAGTGAAAA

>5634 len=131 tot-seq=1

ATCTGATCCCAATCCCACCCGGGAGGTAGTGACGAAAAATAACAATACAGGACTCTTT  
CGAGGCCCTGTAATTGGAATGAGTCCACTTTAAATCCTTTAACGAGGATCCATTGGAGGG  
CAAGTCTGGTG



>5635 len=131 tot-seq=1

GAGCCTGAACCAGCCAAGTAGCGTGCAGGATGACGGCACTATGGGTTGTAAACTGCTTTT  
AGAGGGGAATAAAGTGAGGGACGTGTCCCTTATTGCATGTACCATGCGAATAAGGGCCGG  
CTAATTCCGTG

>5636 len=131 tot-seq=1

TGACGCAGCGACGCCGCGTGAGGGATGACGGTTTTTCGGATCGTAAACCTCTGTCAGAATT  
GAAGAACTACATTGTGCTAATCAGCAGTGTACTGACGGTACCTTCAAAGGAAGCACCCGG  
CTAACTCCGTG

>5637 len=131 tot-seq=1

TGCGCACATGGCACCGTCAGGGTCTGTGCTGATCCTGGGTGCTCAGAGGGCCTGCAGCAG  
CAGGTTTTGTACCAACTCTGCCGGCAACCCAGGTAGAGGCAGGCACGAGCACCTGCTAAA  
CTCAGTTTCCA

>5638 len=132 tot-seq=1

GCGCGTAAATTACCCACTTTGACCCGAAGAGGTAGTGACGACAAATAACTCTTGCGGCC  
CCTCGGGGTGACTTGAAGGAATGATTTAGAAGTAAATTCTCTAAAGAAATCAATTGGAGG  
GCAAGTCTGGTG

>5639 len=132 tot-seq=1

CCCTGATCCAGCAATGCCGCGTGTGAAGAAGGCCTTCGGGTTGTAAAGCACTTTTGTCCG  
GAAAGAAATCGCCGTGGTTAATATCCGTGGCGGATGACGGTACCGGAAGAATAAGCACCG  
GCTAACTACGTG

>5640 len=132 tot-seq=1

CCCGAGCCGCACCAAGAGGCCGCACTGTTGAAATCCTTCTGCCTGGAAGATAAATGGCCT  
ACTTTACTCTCAAGTGTCAAGTAGAGAAAACAAAACAAAACAAAATCCCTTCCAAGTGG  
ATTTTCGGAGGA

>5641 len=132 tot-seq=1

CTGATCCAGCCATGCCGCGTGTGTGAAGAAGGCCTTTTGGTTGTAAAGCACTTTAAGCAG  
TGAAGAAGACCTAACGGTTAATACCCGTTAGCGATGACATTAGCTGCAGAATAAGCACCG  
GCTAACTCTGTG

>5642 len=132 tot-seq=1

CTGATGGAGCAACACCGCGTGAGTGAAGAAGGGTTTCGGCTCGTAAACTCTGTTGTTGA  
AGAAGAACGTGCGTGAGAGTAACTGTTTCATTTCGATGACGGTATCTAACCAGCAAGTCACG  
GCTAACTACGTG

>5643 len=132 tot-seq=1

AGAGCCTGAACCAGCCAAGTAGCGTGCAGGATGACGGCCCTATGGGTTGTAACTGCTTT  
TATAAGGGAATAAAGTGGAGGTCGGGACCTCTTTTGCATGTACCTTATGAATAAGGACCG  
GCTAAGTCCGTG

>5644 len=132 tot-seq=1

TGACCGAGCAACGCCGCGGGAGTGAAGAAGGGTTTCGGATCGTAAAGCTCTGTTGGTAGA  
GAAGAACGTTGGGAGGAGTGGAAAATCTACCAAGTGGCGGTAACCTAACAGAAAGGGACG  
GCTAACTACGTG

>5645 len=132 tot-seq=1

CTGATGGAGCAACGCCGCGTGAGTGAAGAAGGTCTTCGGATCGTAAAGCCCTGTTGTTAG  
AGAAGAAGGTGCGTGAGAGTAACTGGTCACGTTTCGACGGTATCTAACCAGAAAGCCACG  
GTTAACTACGTG

>5646 len=132 tot-seq=1

GCTCAGAAGAGTTCAAAACCTCAGTTCCAAGAGTCTGTACCTTATCTAAGACACAATAGC  
ACATGGCTGAAGATTCTTCAGCAGAGGAGGGAAAGGGGAGTGGGTGTGAGGCCAGGGATC  
CTGGAAAGTTGT

>5647 len=132 tot-seq=1

TAAGGATTTCCCTTTCATCTGCCAGATGAGCCCCCAGGAGGACAATGGGTGCCCCACCT  
GGACATGGGCAGGGGCTTTGAGGCTGCTGGCTGGCAACTGGGGTCGGTGGATGGAGTGGG  
CATGGACTGGGG

>5648 len=132 tot-seq=1

CTGATGGAGCAACGCCGCGTGAGTGAAGAAGGGTTTCGGCTCGTAAACTCTGTTGTTGG  
AGAAGAACGTGAGTAAGAGTAACTGTTTACTCAGTGACGGTACCCAATCAGAAAGTCACG  
GCTAACTACGTG

>5649 len=132 tot-seq=1

AGAGTCTGAACCAGCCAAGTAGCGTGCAGGATGACGGCCCTATGGGTTGTAACTGCTTT

TATAAGGGAATAAAGTTAGTCTCGTGAGACTTTTTGCATGTACCTTTCGAATAAGCGCCG  
GCTAACTACGTG

>5650 len=132 tot-seq=1

CTGATGGAGCAACGCCGCGTGAGTGAAGAAGGGTTTTCGGATCGTAAAGCTCTGTTGTTGG  
AGAAGAACGTGTGAGGGAGTAACTGGTCACGCAGTGACGGTATCCAACCAGAAAAGTCACG  
GCTAACTACGTG

>5651 len=132 tot-seq=1

AGTCTGATGGAGCAACGCCGCGTGAGTGAAGGTTTTCGGATCGTAAAGCTCTGTTGTTGG  
TGAAGAAGCATAGAGGTAGTAACTGGCCTTTATTTGACGGTAATCAACCAGAAAAGTCACG  
GCTAACTACATG

>5652 len=132 tot-seq=1

TTTTTCAAGCAGAAGACGGCATAACGAGATCGTGATTGACTGGAGTTCAGACGTGTGCTC  
TTCCGATCTCCTACGCGAGGCAGCAGCGACTGGGCTCCCTCAGGTTCTTGGCAGAAGCCA  
GCTCCTTCTATG

>5653 len=132 tot-seq=1

TGGGGAGTATTGCACAATGGGCGCAAGACTGATGCAGCAACGCCGCGTGAGGGAAGACGG  
TCTTCGGATTGTAAACCTCTGTCTTTGGTGAAGAAGAAAGGGACGGTAGCCAAGGAGGAA  
GCCACGGCTAAC

>5654 len=132 tot-seq=1

CAACCGTGACTIONCAGGCGGAGCTGGGGCACCTGTCCGCCGAGGGTCAGGAGGGCCAGGCCA  
CCACCATACCCATTGTGCTGACACAGCAGGAGCTGGCTGCCCTGGTGCAGCAGCAGCAGC  
TGCAGGAGGCCC

>5655 len=132 tot-seq=1

CTGATGGAGCAACGCCGCGTGAGTAAAGAGGGTTTTCGGCTCGTAAAGCTCTGTTGTTGG  
TGAAGAAGGACAGGGGTAGTAACTGACCTTTGTTTACGGTAATCAATTA AAAAGTCACG  
GCTAACTACGTG

>5656 len=132 tot-seq=1

TGGGGAATATTGCACAATGGAGGGAACCCCTGATGCAGCAACTCTGCGTGTGTGAAAAAGG  
TTTTCGGACTGTAAACACTTTTAGTAGGGAAGAAAAAATGACGGTACCTACAGAAGAA

GCAACGGCTAAA

>5657 len=132 tot-seq=1

TGCGCAATGGGGGAAAAAATGAAGAAGAGAAGAAGAGTGAGGGATGAAGGAATTAGGGGG  
GGAAAAAGAGGGGGAGGGGGAGAAAGAGGTAGGGTGAGTGTAATTTTGAATAAGCGCCG  
GCTAACTACGTG

>5658 len=132 tot-seq=1

CTGATGGAGCAACGCCGCGTGAGTGAAGAAGGTTTTCGGCTCGTAAACTCTGTTGTTGG  
AGAAGAACGTGCGAGATAGTAACTGTTACGCAGTGACGGTATTCAACCAGAAAGTCACG  
GCTAACTACGTG

>5659 len=132 tot-seq=1

CATCCACAGGCCTGGGGGCCAGGGCTGGTGCTGAATTGCCTGACTCCCACGCCAGGGT  
GGGAAGGTCACCTTGGGCTCTGAGTGGCAGTGTGCTGTGGTTTGCCTAGGCGGGGAACC  
CTGCAAGGACAG

>5660 len=132 tot-seq=1

TTTACGGGTCACCCTGTGGGACCAAGTGTCTGAATCAATCAAGTCAAGATTCTCAGATCC  
AGATTTCTGTACTGGATGCTCCACACCCAACTCCTGTCTCTCCTGTCCTAATAAACAGT  
GCCATTATCCAG

>5661 len=132 tot-seq=1

TTCTAGATGCATGCAGGCCCTACTCACCACAACCTGCTCTGGCACCATGCTGTTACCAG  
TCTCCAAGGCCAAATCCGCTACCCCAGGAGGAAGTGCCTCCCCTGACTATGATGTCAC  
GCTGACAAGCCT

>5662 len=132 tot-seq=1

GTAGGAGGGGTAGTTCGGGAGACACACCAAGAATTTTTCCAGAACATTAGAGCAGCGGGA  
CTCAGTCATGCTGCCGTGTGACGTTACAGGACAGAAAAGTGTGGTGACCAGTTTCCTGT  
TAGAAGAGGGTT

>5663 len=132 tot-seq=1

TTTCATCAGCAATATTTCTGATAGGCCAGATATGCTCGCAGTCATCCAAGTAAAAGCA  
AACAAATACTGACTCTAGGTCCACTGGAATACTAAAGAAGGCACTACAGAAATGAGTCAC  
AGTGTCTCACTT

>5664 len=132 tot-seq=1

GTGTGTGCAGGGTGGAGGGTGTGGGGCTGTGGAACACCAGCCGTTCCACATCTCTGC  
TCTGTGTCTTCTGCAGGTGACGGAAGTACCGCCTCCTCCCGTCTGACGCCCTCAGGGGA  
CCCTGCATCGCT

>5665 len=132 tot-seq=1

ACGGCATAACGAGATTCGCTTGTGACTGGAGTTCAGACGTGTGCTTTACGATCTTTACG  
GGAGGCAGCAGAAGGCGATGGATTCCAAACTGCGGCGATCGGCAAGAGCCATGCAATTGC  
GGTAGCAGTCGG

>5666 len=132 tot-seq=1

TGGGGAATTTCCGCAATGGGCGAAAGCCTGACGGAGCAATGCCGCGTGGAGGTAGAAGG  
CCCACGGGTCTGAACTTCTTTCCCGGAGAAGAAGGAATGACGTGGGGAATAAGCATCG  
GCTAACTCTGTG

>5667 len=132 tot-seq=1

GAAGGAAGCTGAACCACCCCCCAGAAGTCACACACAGCCATCCCTTCAGCCTCCTGTTG  
CCGACACAGGGCAGCCTCATTAGTACGGGACAGACACCAGGAGGCAGGGTCCCCAGGG  
CCATCCTGGAGG

>5668 len=132 tot-seq=1

CTGATGGAGCAACGCCGCTGAGTGAAGAAGGGTTTCGGCTCGTAAAGCACTGTTGTTGG  
TGAAGAAGGACATATGTAGTAACTGACCTTTGTTGACGTTAATCAATTAGAAAGTCACG  
GCTAACTACATG

>5669 len=132 tot-seq=1

CTGATGGAGCAACACCGCTGAGTGAAGAAGGGTTTCGGCTCGTAAAGCTCTGTTGTTGG  
TGAAGAACGTGCGTGATAGTAACTGTTCACTCAGTGACGGTAACCAACTAGAAAGTCACG  
GCTAACTACGTG

>5670 len=132 tot-seq=1

ATGATGGAGAAAAAAGAGTGAAGTGAAGAAGGGTTTAGGATAGTAAAGATATGATGTTGG  
AGAAGAAAGTGCCTGAGAGTAACCGTTCACGCAGTGACGGTATCCAACCAGAAAGTCACG  
GCTAACTACGTG

>5671 len=132 tot-seq=1

GTGTGCAAATTGCCCACTCCGGACACGGGGAGGTAGTGATGAAAAATAACAGGAGTCTTT  
TGAGGCCCTCTAATTGGAATGAGTCCAGTTTAAGTCCTTCCGCGAGGATCCATGGGAGGG  
GCAAGTCTGGTG

>5672 len=132 tot-seq=1

AGACCAAGACTATAGTGACAAGCTAGATGGATGTGATCTCTGCTCCCATGGAGTCACAGT  
CCTGTAGGGGGTGACGAAAAGTGAATGAGCCATTGCAATCGATTTAGCACAATGGATGCC  
ATTACATGGGAC

>5673 len=132 tot-seq=1

CGGAGGGAGCAACGCCGCGGGAGGGAAGAAGGTTTTCGGATCGGAAAGCTTTTTGTTGG  
TGAAGAAGGATAGAGGTTGTAAGTACTGATCTTTATTTGACGGTAATCAACCAGAAAGTCACG  
GCTAACTACGTG

>5674 len=132 tot-seq=1

GTCGCGTTCGATGACTCCACCCCGTGCAGAGGCAGCTGGTGGACATCCGGTACTCCAAG  
GACACGAGGAAGCAGTTCAAGCCGGCCTGGCCTACGTGGGGAAGGTGGAGCTATCCTAC  
CCCGATGGCAGC

>5675 len=132 tot-seq=1

GCAGGAGATATGACCTAGTGGGCTCGAAGGAGACAGGTCCAGGTGCCAAAGAGGAGGACT  
GCAGGCCTACAGAGGGGTGGGGACAACTGATGGGCAGACCTGGAGGCCGGCAAATTATT  
CACAGCAGCCAG

>5676 len=132 tot-seq=1

CTGATGGAGCAACGCCGCGTGAGTGAAGAAGGTTTTCGGCTCGTAAAGCTCTGTTGTTAG  
TGAAGAAAGATAGTGGTAGTAACTGTTCTTTATTTGACGGTAATTACTTAGAAAGTCACG  
GCTAACTACGTG

>5677 len=132 tot-seq=1

TGACGGAGCAACGCCGCGTGAGTGAAGAAGGTCTTCGGATTGTAAAAGTCTGTTATACGT  
GACGAAAAAGGCGTATGCCAACAGTATCCGTCCGTAACCTTACCTTAATACAAAGCCACG  
GCTAACTACGTG

>5678 len=132 tot-seq=1

CTGATGGAGCAACGCCGCGTGAGTGAAGAAGGTTTTCGGAGCGTAAAGCGCTGTGGCTGG

TGAAGAAGGATAGAGGTAGTAACTGGGCTTTATTTGACGGTAATCAACCAGAAAGTCACG  
GCTAACTACGTG

>5679 len=132 tot-seq=1

CTGATGGAGCAACGCCGCGTGAGTGAAGAAGGGTTTCGGCTCGTAAAGCTCTGTTGTTGG  
TGAAGAAGGACAATGGTAGTAACTGTCCTTTGTTTGACGGTAATCAATGAGAAAGCCACG  
GCTAACTACGTG

>5680 len=132 tot-seq=1

CTGATGGAGCAACGCCGCGTGAGTGAAGAAGGGTTTCGGCTCGTAAAGCTCTGTTGTTGA  
AGAAGAACGTTAGTGAGAGTAACTATTCTCGCTGTGACGGTATTCAACCAGAAAGTCACG  
GCTAACTACGTG

>5681 len=132 tot-seq=1

GTTCTTATGGCCCTTGTACCTAAGGGTGGACAGGATCGGGGGGCTTGGTCCTCTACAGGG  
GTGGGAGAGGAGGGAAGGGGATCCCCACGACCACAAGGACTCACTCGCCCAGCAGCTCCC  
CTGTGTCTTTGT

>5682 len=132 tot-seq=1

GCGCGCAAATTGCCACTCCTGACACAGGGAGGCAGTGACAAGAAATAACAATGCGGAGC  
CTACGATTTGCAATTGGAATGAGAACAATTTAAATCCCTTATCGAGGATCCATTGGAGG  
GCAAGTCTGGTG

>5683 len=132 tot-seq=1

CTGATGGAGCAACGCCGCGTGAGTGAAGAAGGGTTTCGGGTCGTAAAGCTCTGTTGGTAG  
TGAAGAAAGATAGATGTAGTAACTGGCCTTTATTGGAAGGTAATTACTGAGAAAGGCACG  
GCTAACTACGTG

>5684 len=132 tot-seq=1

GCGCGTAAATTACCCAATCCTGACATAGGGAGGTAGTGACAATAAATCACAATGCGGAAC  
TATTAGTTTTGCAATTGGATTGAGAACAATGTACAAATGTTATCGATAAACAATTGGAGG  
GCAAGTCTGGTG

>5685 len=133 tot-seq=1

GAGTGGGAGTCAAGAGATACTTCAGTCAGAATTGATGAGAAACATCTGCTCTGCCATGCC  
TATCAGGACAAGAAACAAGATGCACAACGGTGCCACTGGGGGCAGCCAGGCCAGTGA

GACGAACATTCAG

>5686 len=133 tot-seq=1

CTGACGGAGCAACGCCGCTGAGTGAGGACGGGCTTCGGATTGTAAAGCTCTGTTAATCG  
GGACGAATGGTGTGTGTGCAAAGAGGGCATAGACATGACGGTACCGGAATAGAAAGCCAC  
GGCTAACTACGTG

>5687 len=133 tot-seq=1

TAGGGAATATTGCACAATGGAGGAACTCTGATGCAGCAACACCGCGTGAGTGAAGAAGG  
GTTTCGGCTCGTAAAGCTCTGTTGTTGGAGAAGAACGTATCTGAGAGTAACTGTTACAGT  
AGTGACGGTATCC

>5688 len=133 tot-seq=1

TGGGGAATATTGCACAATGGGGGAAACCCTGATGCAGCGACGCCGCGTGAGCGAAGAAGT  
ATTTCCGGTATGTAAAGCTCTATCAGCAGGGAAGATAATGACGGTACCCTGTGAGGAAGCC  
CCGGCTAACTACG

>5689 len=133 tot-seq=1

CGACGACCCAGGCCTTGGTGTCAAATGGCTCTGCCAAAGATGGCTCCTGAGCCCCAAGT  
GGGGGCTTCAAGCAGGGCTGGGGAGGAGGCTACCCTTCTGGCCAGGCCAGGAATGAGCCC  
CCTACCCCTGTCC

>5690 len=133 tot-seq=1

GTAGGTGGAGGTAGCCACTTAGGGCAGGGGAAGGTCCATTGTTGTTACGCCTGGTTTCA  
CTCCCAGGGCAATGTTGACACAGGAGCTCCAAATGCAATGGCGGTAATGCGGGGGTAATG  
GGGCAGAATGCA

>5691 len=133 tot-seq=1

GCGCGCAAATTACCCAATCCCGACACGGGGAGGTAGTGACAATACATAACAATATACGGC  
TTAACGTCGTATAATTGGAATGAGTACAATTTAAATCCCTTAACGAGGAACAATTGGAG  
GGCAAGTCTGGTG

>5692 len=133 tot-seq=1

TCTGATGGAGCAACGCCGCTGAGTGAAGAAGTTTTTCGGCTCGTAAAGCTCTGTTGTAA  
GTGAAGAACGACAGGGGTAGTAACTGACCTTTGTTTGACGGTAATCAGTTAGAAAGTCAC  
GGCTAACTACGTG



>5693 len=133 tot-seq=1

TGTTCTGCAATCCTATGTGAGCGACGAACATTGAGAACTTCGTAGCAGTGTTCTGATATT  
CTATGTGAGAGCAAACACTCACAACCCAGCAGCACTGCTCTGGAATCGTATGTGAGGGAC  
AACAACTCAGAAC

>5694 len=133 tot-seq=1

GGATATTGCACAATGGGGGGAACCTGATGGAGCGACGCCGCGTGAGCGAAGAAGTATCT  
CGGTATGTAAAGCTCTATCAGCAGGGAAGAAGAAATGACGGTACCTGAGTAAGAAGCCCC  
GGCTAACTACGTG

>5695 len=133 tot-seq=1

TACTATATAAAGGTGAGTAAACGATGTTGCTGTTCTGCTGCTGTTGATGACATCAGTTCT  
ATTAAAGTCAAGGTAAACAACTAAATGGTTATGAATTTTCTAAGTTTGGAGCTAATCCAC  
AGATTTATCCTTG

>5696 len=133 tot-seq=1

TTGCACAATGGGCGAAAGCCTGATGCAGGGAGGCCGCGGGCGGGATGAAGGCTTTCGGGT  
TGTAACCGCTTTCAGCAGGGACGAGGCCGAAGGTGACGGTACCTGCAGAAGAAGCCCC  
GGCTAACTACGTG

>5697 len=133 tot-seq=1

AATATTGGGCAATGGGCGAAAGCCTGACCCAGCGACGCCGCGTGAAGGAAGAAGGCCCTC  
GGGTTGTAAACTTCAGTCAACAGGGAAGAAACAAATGACGGTACCTGTGGAGGAAGCCAC  
GGCTAACTACGTG

>5698 len=133 tot-seq=1

GAGGGGGTTTCGGGTGGCTGGCTGGCTGTCATTCATGGCTTTTCAAACCCAGACTCTC  
CCTCGCCACCTGAGTTTTAGCTTCACTATTTTCTCAGCCCCAGGATCTGGGTGTTTCAG  
CAGAAAATTCTCA

>5699 len=133 tot-seq=1

GAGAGTCTGAACCAGCCAAGTAGCGTGCAGGATGACGGCCCTATGGGTGGTAAACTGCTT  
TTGGTTGGGAATAATCGACATTACGTGTAAGGTTTTGCAGGTACCAGTCGAATAAGGACC  
GGCTAATTCCGTG

>5700 len=133 tot-seq=1

CACCTTCCAAGAAAGCATCTGCTCTGTTTTCTCAGGTGACTTCACCAGCTTCCCTTCCT  
CCTCCTCACCTCTCCTAAGGTTGACAAAGCCTGGATTTAGGTCAACCTCTTCAGTGGGT  
CCTTCTGTTGTGG

>5701 len=134 tot-seq=1

GAGGATCAGAAGTTCAAGGTCTTCCTCAGCCACACAGCCAATTCAAAGCAGGATACCCGA  
GACCTCGTCCCCGACAACCGCCCTAGCCCTTGCTTGAGACAGGCTCATTACATCTCACA  
AACCTACATCCACA

>5702 len=134 tot-seq=1

TCAGGAGAATAGAGTCTCTAGTCTGGGAAAGCAGGCTCACCTTAAGGCATGCCAAAGAGG  
TAGGCAGACTCCGTTTTCTTTTCATGAGATACTACACTATACTTCCCAGCGATCACACCC  
TCCCCAGTACTCC

>5703 len=134 tot-seq=1

TGCCCTGCCATAGAAAAGCTGGCAAGACAGTGAGGCAGCAGGCCACAGCGAGGCCCTA  
ACAAAGGCGGGGCGTTGGCAGGCAGCAGAAGAGGGGCGGGCTGAGATGGATGTGGCTTGG  
AGCCTAACAGGCCA

>5704 len=134 tot-seq=1

GTGAGTTGGGCCTGAGCATGGGACAGCTGGCCCTACCACTCATCTCCCTGTGGTTGCTTA  
GATGAGGGAAAGAGTCCCTTCTCCCCTGTCCTGGACCTGGGGTCATAGAGCAGAAGAGCT  
GGCCCTGTCCTTCA

>5705 len=134 tot-seq=1

TGGGGAATATTGCACAATGGGGGAAACCCTGATGCAGCGAAGCCGCGTGAGCGATGAAGT  
ATTTCGGTACAAAAGCTCTATCAGCAGGGAAGAAAATGACGGTACCTGACTAAGAAGCCC  
CGGCTAACTACGTG

>5706 len=134 tot-seq=1

TGGGGAATATTGGGCAATGGGCGCAAGCCTGACCCAACGCCGCGTGAAGGAAGAAGGCTT  
TCGGGTTGTAAACTTCTTTTAAGAGGGAAGAGCAGAAGACTGTACCTCTAGAATAAGCCA  
CGGCTAACTACGTG

>5707 len=134 tot-seq=1

GGCTGTGCTCCTTCCCAAAGGCTTTAGAAGAGGATTCATTCCCTTGCTCATTGAGGTTGT

TGGCAGAATAAAGTTTCTGCAGTCACAGGGCTGAGTTCCTGTTTCCTTGCTGGCTGTCCG  
GCTAAGGGCCATTC

>5708 len=134 tot-seq=1

TAGGGAATCTTCCACAATGGGCGCAAGCCTGATGGAGCAACACCGCGTGAGTGAAGAAGG  
GTTTCGGCTCGTAAACTCTGTTGTTGAAGAAGAACGTGCGTGAGAGTAACTGTTACAC  
TGTGACGGTATCTT

>5709 len=134 tot-seq=1

TGGGGAATCTTGACAATGGGCGAAAGCCTGATGCAGCGACGCCGCGTGATTTAGAAGGC  
CTTCGGGTTGTAAAATCTTTTATATGGGAAGAAAATGACAGTACCATAAGAATAAGGTC  
CGGCTAAATACGTG

>5710 len=134 tot-seq=1

TAGGGAATATTCCACAATGAGCGAAAGCTTGATGGAGCGACGCCGCGTGATTTAGAAGGC  
CTTCGGGTTGTAAAATCTTTTGTATGGGAAGAAAATGACAGTACCATAACGAATAAGGAC  
CGGCTAATTACGTG

>5711 len=134 tot-seq=1

TAGGGAATCTTCCACAATGGGCGAAACCCTGATGCAGCGACGCCGCGTGATTTAGAAGGC  
CTTCGGGTTGTAAAATCTTTTCTATGAGAAGAAAATGACAGTACCATAGGAATAAGGAC  
CGGCTAATTACGTG

>5712 len=134 tot-seq=1

TTAGGAATCTTCGGCAATGGGGGAAACCCTGACCGAGCGACACTGCTTGAAGGATGAAGG  
TCTTCGGATCGTAAACTTCTGAACCTGCGACGAAAATGACGGTAGCAGGCTAATAGCAC  
CGGCTAACTCCGTG

>5713 len=134 tot-seq=1

AGTCTGATGGAGCAACGCCGCGTGAGTGAAGAAGGGTTGCGGCTCGTAAAGCTCTGTTGT  
TGGCGAAGAAGGACAGGGGTAGTAACTGACCTTTGTTGAGGTAATCAACCAGAAAGTCA  
CGGCTAACTACGTG

>5714 len=134 tot-seq=1

TGGGGGATATTGCACAATGGGGGGAACCCTGATGCAGCGACGCCGCGAGTGAAGAAGTAT  
TTCGGTATGTAAAGCTCTATCAGCAGGGAAGAAGAAAAGACGGTACCTGAGTAAGAAGCCC

CGGCTAACTACGTG

>5715 len=134 tot-seq=1

GCGCGCAAATTACCCAATCCTGACATGGGGAGGCAGTGACAATAAATAACAATACTGGGC  
TCATCGAGTCTGGTAATTGGAATGAGTACAATCTAAATCCCTAACGAGGATCCATTGGA  
GGGCAAGTCTGGTG

>5716 len=134 tot-seq=1

GGCTTTTATGTAAGTGGTCTCTGGTCTTTGTCTGTTTGGTGGTGTACTTTTTTTTTTTAA  
GCTACTGTCATTGCCAGTCGTAGTTGAGCGTGTGTCCAGTTGCTTTATGTGTGGGCTTC  
CTGGGGATGCCCTC

>5717 len=134 tot-seq=1

CAAGACACTGACCAAACATCTTCAGGAAACAAGCGAGTGAGCAGCTCCGCGGAACGTGAG  
GCAGCAGGAGACTCACGGGGTCTTTGCGTCCCCACCCCTCCGCGGACCCTGGATCTCCA  
GGGACCCAGCCCCT

>5718 len=134 tot-seq=1

TGAGGAATATTGGTCAATAGGCGAGAGCCTGAACCAGCCACGTAGCGTGCAGGATGACGG  
CCCTATGGGTTGTAACTACTTTTATGTGGGGATAAAGTGCGCGACGTGTCGTGCATTGC  
AGTTACCACATGAA

>5719 len=134 tot-seq=1

CTTAACTCTTCTCTCTCTGGGCACAAGCGTGAGCCGTGCCATGCCGTGCTGTGCCGAAC  
CCTGCCCTGGCTCCCCTCTGTCCATCTGCAAATGGACGGCTCTGGTTATCCCTCTCCTC  
TCTTCTCTGGGTG

>5720 len=134 tot-seq=1

TGTTCTGGAATCCTATGCCAGGGACAAACACTCAGAAACCAGCAGTAGTGTCTGGATTC  
GTTTCTGAGGGACAAACATTCAGGACCTTGTAGCAGTGTTGTGGAATCCCATTTGAGGGA  
CAAATACTGAAC

>5721 len=134 tot-seq=1

GATTGAAAAAGACATCAACCTACAAGAACATAGAGGGAAGTTTAGCAGCAAAACAGCAAC  
AATGTCTTGAAGCCAGAAAGCAGATGAATAAATCTTAAATATCAGGGTAGATGTGAGAA  
AATGACATAACAAG

>5722 len=134 tot-seq=1

TAGGGAATCTTCACAATGGGCGAAAGCCTGATGCAGCGACGCCGCGTGAGCGAAGAAGTA  
TTTCGGTATGTAAAGCTCTATCAGAAGGGAAGAAAATGACGATACCTTACTAAGAAGCTC  
CGGCTAAATACGTG

>5723 len=134 tot-seq=1

TGGGGAATTTTGCACAACGGGGGAAGCCCTGATGCAGCGACGCCGCGTGATTTAGAAGGC  
CTTCGAGTTGTAAAATCTTTTGTATGGGAAGAAAATGATAGTACCATACGAATAAGGAC  
CGGCTAATTACGTG

>5724 len=134 tot-seq=1

CCCTGATGCAGCGACGCCGCGTGATTTAGAAGGCCTTCGGGTTGTAAAATCTTTTGTAT  
GGGAAGAACGAGTGTGAGAATGGAAAGTTCATGCTGTGGCGGTACTTAACAAGAAGGGGA  
CGGCTAACTACGTG

>5725 len=134 tot-seq=1

AGCATGCCCTGCCCTGCTCCAGGCAGAAGGGTTGTAGGACTTAATCACGTTTCAGCTTGG  
CTGTCGGGCTGTGAGTCACGGTTCGACTGCGATTATGTAAGCACGCAGGAATAGGTGGCA  
TGACATATATGCTG

>5726 len=134 tot-seq=1

TGTTCTGCAATGCTATGTGAGGGACAAACATTCAAACAAGAGCAGGAATGTTCTGGAATC  
CTATGTTATGGTCAAACATTCAGAATATTGTCTCAATTATCTGGAATTCTATGTGAGGGA  
GAAACACTGTGAAC

>5727 len=134 tot-seq=1

CCCTGATGCAGCAACGCCGCGTGAGTGATGAAGGTTTTCGGCTCGTAAAACCTGTTGTT  
AAGGAAGAACAACCTGAGGTAGTAACTGGCCTTGAGATGACGGTACTTAACCAGAAAGCCA  
CGGCTAACTACGTG

>5728 len=134 tot-seq=1

GCGCACAAATTACCCACTCCCGACCCGGGGAGGTAGTGACGAAAAATAACAATACAGGAC  
TCTTTCGAGGCCCTGTAATTGGAATGAGTCCACTTAATCCTTCAACGAGGATCCATTGGA  
GGGCAAGTCTGGTG

>5729 len=134 tot-seq=1

GGACCTGCTTCCCTAGGGGGAAGATGGGGCGCAGGGCAGGCTGTCCATCAAGGTGCTCC  
AATTATGGGGATGGAGGGCCCTGGGGGAAGATCTGGCCAAAGCCCGTGGCCTCCCCCGCA  
GCACGTGCACCCAC

>5730 len=134 tot-seq=1

GGAAGCACTGAGCAGGGGCCGAGTCAATCAGGGGTGTGTCTGAGGGACTGGGAGTCTGGG  
CAGGGTGGGGCATGTGGCACAGCAGGGGGCCTGGCAGCCCGGGAGGATAAAGGCAGAGT  
GGCAAGGGACGGA

>5731 len=134 tot-seq=1

AGGCGGAGGGAGCGACGCCGCTGAGGGAAGAAGGGTTTCGGATCGTAAAGCTCTGTTGT  
TGGTGAAGAAGGATAGAGGTAGTAACTGGCCTTTATTTGACGGTATCAACCAGAAAGTCA  
CGGCTAACTACGTG

>5732 len=134 tot-seq=1

AGTATGTCCAAGAATTCTCACCTGGGAAGACAGACATTCCAGGGAAACACTGATATTTTT  
GTTTTCTCCTCACTGGGAAAAAGGCAGCTGGCCTTCAGAAAACAACCTGCATGTACCTTA  
TCTCCCCACCCTC

>5733 len=134 tot-seq=1

AATAAGATGAAGTTGTACTAGAATATGGTGAACCCCAATCCAGTGATTGGCATCCTTATG  
AGGAGAGGGAAATTTAGAGCCTGAGACACACGGAGGGAAGGCAGTGTGAAGACCCAGGAG  
GATGCCCCGCGGTG

>5734 len=134 tot-seq=1

TGGGGAATATTGGACAATGGGCGAAAGCCTGATCCAGCGACGCCGCGTGAGGAAGAAGGT  
CTTCGGATTGTAACTCCTGTTGTTGGGGAAGATAATGACGGTACCCAACAAGGAAGTGA  
CGGCTAACTACGTG

>5735 len=134 tot-seq=1

TGGGGAATATTGCACAATGGACGGAAGTTTGATGCAGCGACGCCGCGTGATTTAGAAGGC  
CTTCGGGTTGTAAAAATCTTTTGTATGGGAAGAAAATGACAGTACCATACGAATAAGGAC  
CGGCTAATTACGTG

>5736 len=134 tot-seq=1

TGCTTTGGAATCCTGTGTGAGCGACAAGGACTCAGGAATTCATAGCATTGTTCTGGAATT

CCATGTAAGAGGCACACACTGAGAACCCAGCAGCACTGTTCTGGAATCCTATGTGAGGGA  
CAAAAACCTCAGAAC

>5737 len=134 tot-seq=1

CGGGAGCCTGAACCAGCCAAGGAGCGTGCAGGAAGACGGCACTATGGGTTGTAACTGCT  
TTTATGCGGGGATAAAGGAGTACACGTGTGGGTTTTTGCAGGTATCGCATGAATAAGGAC  
CGGCTAATTCCGTG

>5738 len=134 tot-seq=1

GGATCGTAACAGGAGAGTCCGGCAGGGCATTTTTACACACTGAGCAGTTGGATGGAAATG  
GACGAAAAATTTGCTGTCTCCATTCTGCTAACCAATGTCATTAGTGCCGGCGTTCTC  
GGAAATCACTTCGT

>5739 len=134 tot-seq=1

TGGGGATATTGCACAATGGGGGAAACCCTGATGCAGCGACGCCGCGTGAGTGAAGGAGTA  
TCTCGGTATGTAAAGCTCTATCAGCAGGGAAGAAAGTGACAGTACCTGGCTAAGAAGCTC  
CGGCTAACTACGTG

>5740 len=134 tot-seq=1

CCTGACCGAGCAACGCCGCGTGAGTGAAGAAGGTCTTCGGATCGTAAAGCGCTGTTGTTA  
AGGAAGAACGAGTGTGAGAGGGGAAAGTTCATACTGTGACGGTACTTAACCAGAAAGGGA  
CGGCTAACTACGTG

>5741 len=134 tot-seq=1

TAGGGAATCTTCGGCAATGGGGAAACCCTGATGCAGCAACGCCGCGTGAGTGAAGAAGTC  
ATTCGTGATGTAAAGCTCTATCAGCAGGGAAGAAAATGACGGTACCTGAGTAAGAAGCCC  
CGGCTAACTACGTG

>5742 len=134 tot-seq=1

TGGGGAATATTGCACAATGGGGGAAACCCTGATGCAGCAACGCCGCGTGAGTGAAGAAGC  
GCCTCGGCGCGTAAAGCTCTGTGAGGGAAGAAAAAAGACGGTACCTGACCAAGAAGC  
CCCGGCTAACTACG

>5743 len=134 tot-seq=1

GCCTGATCCAGCCATGCCGCGTGTGTGAAGAAGGGTTTTCGGCTCGTAAAGCTCTGTTGGT  
AGTGAAGAAAGATAGAGGTAGTAACTGGCCTTTATTTGACGGTAATTAAGTAAAGTCA

CGGCTAACTACGTG

>5744 len=134 tot-seq=1

GTCTGATGGAGCAACGCCGCTGAGTGAAGAAGGGTTTCGGCTCGTGAAGCGCTGTTGGT  
AGTTAAGAAAGATAGAGGCAGTAACTGGCCTTTATTTGACGGTAATTAAGTAAAGTCA  
CGGCTAACTACGTG

>5745 len=135 tot-seq=1

CGTTAGAGCTGTTATATCATGTCCAGCTGAGAAAATAAGGACCGTGACAGGCAAAGCAGA  
TACAAAATCAAGGTCTAGAAAACATAAGTAATGAAAGGCACCTGCTGCTGGGCAGTGGCA  
GCCATGACTTTAATC

>5746 len=135 tot-seq=1

AGGTGTGAGTGAATGGGGAGTAAGGGCAGCAGGACACCACATGACACTGAGGGAGGGGA  
ACCGCCAGGTCCTACAGGCACAGGACTGTAGGCTGGAGACAGACACCGTCAGATCTGTT  
CTGAAAATAGTAGCC

>5747 len=135 tot-seq=1

TGGGGAATATTGCACAATGGGGGAAACCCTGATGCAGCGACGCCGCTGAGTGAGGAAGT  
AATTCGTTATGTAAAGCTCTATCAGCAGGGAAGAAAATGACGGTACCTGAAGAATAAGCA  
CCGGCTAACTACGTG

>5748 len=135 tot-seq=1

TGGGGGATATTGGACAATGGGGGAAACCCTGATCCAGCGACGCCGCTGAGCGATGAAGT  
ATTCGGTATGTAAAGCTCTATCAGCAGGGAAGAAAATGACGGTACCTGACTAAGAAGCA  
CCGGCTAAATACGTG

>5749 len=135 tot-seq=1

TGGGGAATATTGCACAATGGGGGAAACCCTGATGCAGCAATGCCGCTGGGTGATGGAGT  
ATTCGGTATGTAAAGCTCTATCAGCAGGGAAGATAATGACGGTACCTGACTAAGAAGCT  
CCGGCTAAATACGTG

>5750 len=135 tot-seq=1

TTAGGAATCTTGGACAATGGGCGCAAGCCTGATCCAGCCATGCCGCTGAGTGATGAAGG  
CCTTAGGGTTGTAAAGCTCTTTCAGCGGGGAAGATAATGACGGTACCCGCAGAAGAAGCC  
CCGGCTAACTTCGTG



>5751 len=135 tot-seq=1

TGGGGAATTTTGGACAATGGGCGCAAGCCTGATGCAGCGACGCCGCGTGAAGGAAGAAGT  
ATTCGGTATGTAACTTCTATCAGCAGGGAAGAAAATGACGGTACCTGAGTAAGAAGCC  
CCGGCTAACTACGTG

>5752 len=135 tot-seq=1

TAGGGAATCTTCCGCAATGGGCGAAAGCCTGACGGAGCAACGCCGCGTGAGTGAAGAAGT  
ATTCGGTATGTAAAGTTCTATCAGCAGGGAAGAGAATGACGGTACCTGAGTAAGAAGCC  
CCGGCTAACTACGTG

>5753 len=135 tot-seq=1

TGGGGAATATTGCACAATGGGGGAAACCCTGGTGCAGCGACGCCGCGTGAGTGAAGAAGT  
GTTTCGGTATGTAAAGCTCTATCAGCAGGGAAGAGAATGACGGTACCTGAGTAAGGAGCC  
CCGGCTAACTACGTG

>5754 len=135 tot-seq=1

TGGGGAATTTTGGACAATGGGCGCAAGCCTGATGCAGCGACGCCGCGTGGAGGAAGAAGG  
CCTTCGGATTGTAACTCCTGTTGTTGAGGAAGATAATGACGGTACTCAACAAGGAAGTG  
ACGGCTAACTACGTG

>5755 len=135 tot-seq=1

TGGGGAATATTGCACAATGGGGGAAACCCTGATGCAGCGACGCCGCGTGAGTGAAGAAGT  
ATCTTGGTATGTAACTTCTATCAGCAGGGAAGAAAATGACGGTACCTGAGTAAGAAGCC  
CCGGCTAACTACGTG

>5756 len=135 tot-seq=1

TGGGGAATATTGGACAATGGGCGCAAGCCTGATCCAGCCATGCCGCGTGAGTGATGAAGG  
CCTTAGGGCTGTAAAGCTCTTTCACCGGAGAAGATAATGACGGTATCCGGAGAAGAAGCA  
CCGGCTAACTCCGTG

>5757 len=135 tot-seq=1

TGGGGAATATTGCACAATGGAGGAGACTCTGATGCAGCGACGCCGCGTGAGTGAAGAAGT  
AATTCGTTATGTAAAGCTCTATCAGCAGGGAAGATAGTGACGGTACATGACTAAGAGGCT  
CCGGCTAAATACGTG

>5758 len=135 tot-seq=1

TAGGGAATATTGCGCAATGGGCGAAAGCCTGACGCAGCGACGCCGCGTGAGTGACGAAGG  
CCTTCGGGTCGTAAAGCTCTGTTGTAAGGGAAAATTATGATGGTACCTTATAAGAAAGGA  
CCGGCTAACTTCGTG

>5759 len=135 tot-seq=1

CCAGTTTTGTGAAGTGGTTTTTTAGAAGGTGGAGTAAGTTGTTCTCACTGTTGTACGCTC  
TTGGGTGAGCATCAAGGCAGTGAGAGCTGTGCTTCCTTGACGCATCCTGCCCTCCTCAT  
GACCTACGAGAGGCC

>5760 len=135 tot-seq=1

TGGGGAATATTGCGCAATGGGCGAAAGCCTGATGCAGCGACGCCGCGTGAAGGATGAAGT  
ATTCGGTATGTGAAGCTCTATCAGCAGGGAAGAAAATGACGGTACCTGACTAAGAAGCA  
CCGGCTAAATACGTG

>5761 len=135 tot-seq=1

TGGGGAATATTGCACGATGGGGGAAACCCTGATGCAGCGACGCCGCGTGAGCGATGAAGT  
ATCTCGGTATGTAAAGCTCTGTCAGCAGGGAAGAAAATGACGGTACCTGACTAAGAAGCA  
CCGGCTAAATACGTG

>5762 len=135 tot-seq=1

TGGGGGATATTGCACAATGGGGGAAACCCTGATGCAGCGACGCCGCGTGGGTGAAGACGG  
CCTTCGGGTTGTAAAGCCCTGTTGCAGAGGACGATAATGACGGTACTCTGTAAGAAAGCC  
ACGGCTAACTACGTG

>5763 len=135 tot-seq=1

CGGGGAATATTGCATAATGGGGGAAACCCTGATGCAGCGACGCCGCGTGAGTGAAGAAGT  
ATTCGGTATGTAAAGCCCTATCAGCAGGGGAGAAAAGTACGGTACCTGAATAAGAAGCC  
CCGGCTAACTACGTG

>5764 len=135 tot-seq=1

TGAGGAATATTGGTCAATGGGGGCAACCCTGACGCAGCAACGCCGCGTGCGGGACGAAGG  
CCTTCGGGTTGTAAACCGCTTTCAGCAGGGAAGACTTTGACGGTACCTGCAGAAGAAGCT  
CCGGCTAACTACGTG

>5765 len=135 tot-seq=1

TGAGGAATATTGGTCAATGGGGGAAACCCTGATGCAGCGACGCCGCGTGAAGGAAGAAGT

ATCTCGGTATGTAACTTCTATCAGCAGGGGAGATAATGACGGTACCTGACTAAGAAGCC  
CCGGCTAACTACGTG

>5766 len=135 tot-seq=1

TGGGGAATATTGCACAATGGGGGAAACCCTGATGCAGCGACGCCGCGTGAAGGATGAAGT  
ATTTTCGGTATGTAACTTCTATCAGCAGGGGAAGAAAATGACGTTACCCGCAGAAGAAGCA  
CCGGCTAACTCCGTG

>5767 len=135 tot-seq=1

GGAAGCAGGGCACTGACTAACTTCCAGGAGAGAGGGAGGAAGCCAGGGATGCAGAGTAG  
AAGACAATGCTCAACTCAGTGTTCATTCTGCATAACTCCTCACATGCCTGGCAGAGCAT  
CTTCCAGAGATCCCC

>5768 len=135 tot-seq=1

TGGGGAATATTGGACAATGGGCGAAAGCCTGATCCAGCGACGCCGCGTGAAGGAAGAAGT  
ATCTCGGTACGTAACTTCTATCAGCAGGGGAAGAGATTGACGGTACCTGACTAAGAAGCC  
CCGGCTAACTACGTG

>5769 len=135 tot-seq=1

AAGACCAGAAAAGATCCAACCTAGCTCTGCTCCCTCCGTCAATCTGCCAGCTCTTTATG  
CAAAGATGGGGCTGAGGAGGGTCCACTCAGTGAATGGATAGCCACTACATATCTTATCCT  
GGGCATCAGCCAAAA

>5770 len=135 tot-seq=1

TGGGGAATATTGCACAATGGGGGAAACCCTGATGCAGCGACGCCGCGTGAAGGATGAAGT  
ATTTTCGGTATGTAACTTCTATCAGCAGGGGAAGAAGATGACGGTACCTGACTAGAAAAGCC  
ACGGCTAACTACGTG

>5771 len=135 tot-seq=1

TGGGGGATATTGCACAATGGGGGAAACCCTGATGCAGCGACGCCGCGTGAGTGAAGAAGT  
ATCTCGGTATGTAAAGCTCTATCAGCAGGGGAAGAAAATGACGTTACCCGCAGAAGAAGCA  
CCGGCTAACTCCGTG

>5772 len=135 tot-seq=1

TGGGGAATATTGCACAATGGGGGAAACCCTGATGCAGCGACGCCGCGTGAAGGAAGAAGT  
ATCTCGGTATGTAACTTCTATCAGCAGGGGAAGATAATGACGGTACCTGAAGAATAAGCA

CCGGCTAACTACGTG

>5773 len=135 tot-seq=1

TAGGGAATCTTCCGCAATGGGCGAAAGCCTGACGGAGCAACGCCGCGTGGAGGAAGAAGG

TTTTCGGATTGTAACTCCTGTCGTTAGGGACGATAATGACGGTACCTAACAAGAAAGCA

CCGGCTAACTACGTG

>5774 len=135 tot-seq=1

TGGGGAATATTGCACAATGGGGGAAACCCTGATGCAGCGACGCCGCGTGAGTGATGTAGT

ATTTCCGGTATGTAAACTCTATCAGCAGGGAAGATAATGACGGTACCTGACTAAGAAACA

CCGGCTAAATACGTG

>5775 len=135 tot-seq=1

TGGGGAATATTGCACAATGGGGGGAACCCCGATGCAGCGACGCCGCGTGAGTGAAGAAGT

ATTTCCGGTATGTAAAGCTCTATCAGCAGGGAAGAAAGTGACGGTACCTGAATAAGAAGTC

CCGGCTAACTACGTG

>5776 len=135 tot-seq=1

TGGGGAATTTTGGACAATGGGGGCAACCCTGATCCAGCAACGCCGCGTGAGCGAAGAAGT

ATTTCCGGTGTGTAAAGCTCTATCAGCAGGGAAGAAAATGACGGTACCTGACTAAGAAGCC

CCGGCTAACTACGTG

>5777 len=135 tot-seq=1

TGGGGAATATTGGGCAATGGACGAAAGCCTGATCCAGCAATGCCGCGTGAGTGAAGAAGG

CCTTAGGGTTGTAAAGCTCTTTTAGTAGGGAAGATAATGACGGTACCTACAGAAAAGCA

CCGGCTAACTTCGTG

>5778 len=135 tot-seq=1

TGGGGAATTTTGGACAACGGGGGAAACCCTGATGCAGCGACGCCGCGTGAGTGAAGAAGT

AATTCGTTATGTAAAGCTCTATCAGCAGGGAAGAAAATGACGGTACCTGAGTAAGAAGCC

CCGGCTAACTACGTG

>5779 len=135 tot-seq=1

TGGGGGATATTGCACAATGGGGGAAACCCTGATGCAGCGACGCCGCGTGGAGGAAGAAGG

TTTTCGGATTGTAACTCCTGTCGTTAGGGACGATAATGACGGTACCGGAAGAATAAGCA

CCGGCTAACTACGTG

>5780 len=135 tot-seq=1

TAGGGAATCTTCGGCAATGGGCGAAAGCCTGACCGAGCAACGCCGCGTGAGTGAAGAAGT  
ATCTCGGTATGTAAAGCTCTATCAGCAGGGAAGAAAATGACGGTACCTGACTAAGAAGCC  
CCGGCTAACTACGTG

>5781 len=135 tot-seq=1

TGGGGGATATTGCACAATGGGGGAAACCCTGATGCAGCAACGCCGCGTGAAGGAAGAAGG  
TCTTCGGATTGTAACTTCTGTCCTCAGGGAAGATAATGACGGTACCTGAGGAGGAAGCT  
CCGGCTAACTACGTG

>5782 len=135 tot-seq=1

CAGAGAACCGGACAGCTTCTGGGACGGGCAGAAGCACAGAGCCGCTGAGGCAGCAGCCTG  
GGCGTGCCACAGACAACCGGCCACCATCCGGACCAGAGGACAGGTGTCCGCCTGGCTTGG  
GAGGCGGCCTCAGCC

>5783 len=135 tot-seq=1

TGGGGAATATTGCACAATGGAGGAACTCTGATGCAGCGACGCCGCGTGAGTGATGAAGT  
ATTTTCGGTATGTAAAGCTCTTTCAGCAGGGAAGATAATGACGGTACCTGCATAAGAAGCC  
CCGGCTAACTACGTG

>5784 len=135 tot-seq=1

GGGGGAATATGGCGAAAGGGGGGAAACCAGGAAGCAGCAACGACGAGGGAGGGATGAAGG  
CAGTCGGGTTGAAAACGCTGGCAGAAGGGAAGACATCGAAGGGACCTGCAGAAGAAGAC  
CCGGCTAACTACGTG

>5785 len=135 tot-seq=1

TGGGGAATATTGCACAATGGGCGAAAGCCTGATGCAGCAACGCCGCGTGAGCGAAGAAGG  
CCTTCGGGTTGTAAAGCTCTGTCCTTAGGGAAGATAATGACGGTACCTGAGGAGGAAGCC  
CCGGCTAACTACGTG

>5786 len=135 tot-seq=1

TGGGGAATATTGCACAATGGGGGAAACCCTGATGCAGCGACGCCGCGTGGAGGAAGAAGG  
TCTTCGGATTGTAACTCCTGTCGTTGGGGACGATAATGACGGTACCCAACAAGAAAGCC  
ACGGCTAACTACGTG

>5787 len=135 tot-seq=1

TGGGGAATATTGCACAATGGGGGAAACCCTGATGCAGCAACGCCGCGTGGGTGAAGAAGT  
ATTTCCGGTATGTAAAGCCCTGTAAGCAGGGAAGAAGGAGACGGTACCTGACCAAGAAGCC  
CCGGCTAACTACGTG

>5788 len=135 tot-seq=1

TAGGGAATCTTCCACAATGGACGCAAGTCTGATGCAGCGACGCCGCGTGAGTGAAGAAGT  
ATTTCCGGTATGTAAAGCTCTATCAGCAGGGAAGATAATGACGGTACCTGACTAAGAAGCA  
CCGGCTAAATACGTG

>5789 len=135 tot-seq=1

TAGGGAATCTTCGGCAATGGACGGAAGTCTGACCGAGCAACGCCGCGTGAGTGAAGAAGG  
TTTTCCGGTGTAAAAATCTTTTGTATGGGAAGAAAATGACAGTACCATACGAATAAGGA  
CCGGCTAATTACGTG

>5790 len=135 tot-seq=1

AGTCTGATGGAGCAACGCCGCGTGGGTGAAGGAGGGCCTCGGCTCGTAAAGCTCTGTTGT  
TGGTGAAGAAGGACGGGGTAGTAACTGACCTTTGTTGACGGTAATCAATTAGAAAGTC  
ACGGCTAACTACGTG

>5791 len=135 tot-seq=1

TGAGGAATCTTCCACAATGGACGAAAGTCTGATGGAGCAACTCCGCGTGCAGGATGAAGG  
CCTTCGGGTCGTAACTGCTTTTATGAGTGAAGAATATGACGGTAACTCATGAATAAGGG  
TCGGCTAACTACGTG

>5792 len=135 tot-seq=1

TGGGGAATTTTGCACAATGGGGGAAACCCTGATGCAGCGACGCCGCGTGAATGAAGAAGG  
CCTTCGGGTTGTAAATTCTGTCCTTAGTGAAGATAATGACAGTAACTAAGAAGCAAGCC  
CTGGCTAAATACGTG

>5793 len=135 tot-seq=1

TGGGGAATATTGGACAATGGGGGAAACCCTGATCCAGCGACGCCACGTGAAGGAAGAAGT  
ATCTCCGGTATGTAACTTCTATCAGCAGGGAAGATAATGACGGTACCTGACTAAGAAGCC  
CCGGCTAACTACGTG

>5794 len=135 tot-seq=1

TGGGGGATATTGCACAATGGGGGAAACCCTGATGCAGCGACGCCGCGTGAGTGAAGACGG

CCTTCGGGTTGTAAAGCTCTGTCAACGGGGACGATAATGACGGTACCCGTGAAGGAAGCC  
ACGGCTAACTACGTG

>5795 len=135 tot-seq=1

TGGGGAATATTGCGCAATGGGGGAAACCCTGACGCAGCAACGCCGCGTGCGGGATGAAGG  
CCTTCGGGTTGTAAACCGCTTTCAGCAGGGAAGACATCGACGGTACCTTTCGAATAAGCG  
CCGGCTAACTACGTG

>5796 len=135 tot-seq=1

TGGGGAATATTGGACAATGGAGGAACTCTGATCCAGCAACGCCGCGTGCGGGATGAAGG  
CCTTCGGGTTGTAAACCGCTTTCAGCAGGGAAGACATCGACGGTACCTGCAGAAGAAGCC  
CCGGCTAACTACGTG

>5797 len=135 tot-seq=1

TGGGGAATATTGCGCAATGGGGGAAACCCTGACGCAGCGACGCCGCGTGCGGGATGAAGG  
CCTTCGGGTTGTAAACCGCTTTCAGCAGGGAAGACATCGACGGTACCTAACCAGAAAAGCC  
ACGGCTAACTACGTG

>5798 len=135 tot-seq=1

TGGGGAATATTGCACAATGGGGGAAACCCTGATGCAGCGACGCCGCGTGAGCGAAGAAGG  
CTTTCGAGTCGTAAAGCTCTGTCCTATGAGAAGATAGTGACGGTACCGAAAAAGCAAGCC  
ACGGCTAACTACGTG

>5799 len=135 tot-seq=1

TGGGGAATATTGCACAATGGGCGCAAGCCTGATGCAGCAACGCCGCGGAGCGAAGAAGT  
ATTTCCGGTATGTAAAGCTCTATCAGAAGGGGAGAAAATGACGGTACCTTACTAAGAAGCT  
CCGGCTAAATACGTG

>5800 len=135 tot-seq=1

TGGGGAATATTGCACAATGGGCGAAAGCCTGGTGCAGCGACGCCGCGTGAGCGAAGAAGT  
ATTTCCGGTACGTAAAGCTTATCAGAAGGGAGGAAAATGACGGTACCTTACTAAGAAGCT  
CCGGCTAAATACGTG

>5801 len=135 tot-seq=1

TGGGGAATCTTGGACAATGGGGGAAACCCTGATCCAGCCATGCCGCGTGATCGATGAAGG  
CCTTAGGGTTGTAAAGATCTTTCAGCTGGGAAGATAATGACTGTACCAGCAGAAGAAGCC

CCGGCTAACTCCGTG

>5802 len=135 tot-seq=1

TGGGGAATATTGGGCAATGGGCGAAAGCCTGACCCAGCGACGCCGCGTGAAGGAAGAAGG  
CCTTCGGGTTGTAACTTCTTTTATTAGGGACGATAGTGACGGTACCTAATGAATAAGCC  
ACGGCTAACTACGTG

>5803 len=135 tot-seq=1

TGGGGAATATTGCGCAATGGGGGAAACCCTGACGCAGCGACGCCGCGTGCGGGATGAAGG  
CCTTCGGGTTGTAAACCGCTTTTGACAAGCTTTCGGGTGAGTGTACCTTTCGAATAAGCG  
CCGGCTAACTACGTG

>5804 len=135 tot-seq=1

TGGGGAATATTGGACAATGGGCAAAGCCTGATCCGGCAATGCCGCGTGAATGATGAAGG  
CCTTAGGGTTGTAAAGCTCTTTTACCCGGGATGATGATGACAGTACCGGAAGAATAAGCT  
CCGGCTAACTCCGTA

>5805 len=135 tot-seq=1

TAGGGAATCTTCCACAATGGGCGGAAGTCTGACCGAGCAACGCCGCGTGAACGATGAAGG  
TCTTCGGATCGTAAAGTTCTGTTGCAGGGGAAGATAATGACGGTACCCTGTGAGGAAGCC  
CCGGCTAACTACGTG

>5806 len=135 tot-seq=1

TAGGGAATCTTCGGCAATGGACGGAAGTCTGACCGAGCAACGCCGCGTGAACGAAGAAGG  
CTTTCGAGTCGTAAAGTTCTTTTATATGGGAAGATAATGACGGTACCATAAGAAAAAGCC  
CCGGCTAACTACGTG

>5807 len=135 tot-seq=1

TGGGGAATCTTCCACAATGGGCGCAAGCCTGATGGAGCAACACCGCGTGAGTGAAGAAGG  
CTTTCGAGTCGTAAAGTTCTTTTATATGGGAAGATAATGACGGTACCATAAGAAAAAGCC  
CCGGCTAACTACGTG

>5808 len=135 tot-seq=1

TGGGGAATATTGCACAATGGGCGCAAGCCTGATGCAGCAACGCCGCGTGAACGATGAAGG  
TCTTCGGATCGTAAAGTTCTGTTGCAGGGGAAGATAATGACGTTACCCGCAGAAGAAGCA  
CCGGCTAACTCCGTG



>5809 len=135 tot-seq=1

TGGGGAATATTGCACAATGGGGGAAACCCTGATGCAGCGACGCCGCGTGAGCGAAGAAGT  
ATTCGGTATGTAAAGCTCTATCAGCAGGGAAGATAATGACGGTACCTTTCGAATAAGCG  
CCGGCTAACTACGTG

>5810 len=135 tot-seq=1

TAGGGAATCTCCACAATGGACGCAAGTCTGATGGAGCAACGCCGCGTGAGTGAAGAAGG  
TTTTCGGATCGTAAAGCTCTGTTGTTGGTGAAGAAGGATAGAGGTAGTAACCAGAAAGGG  
ACGGCTAACTACGTG

>5811 len=135 tot-seq=1

TAGGGAATCTCCACAATGGACGCAAGTCTGATCCAGCCATGCCGCGTGAGTGAAGG  
CCTTAGGGTTGTAAAGCTCTTTCACCGATGAAGATAATGACGGTAGTCGGAGAAGAAGCC  
CCGGCTAACTTCGTG

>5812 len=135 tot-seq=1

TAGGGAATCTCCACAATGGACGCAAGTCTGATGGAGCAACGCCGCGTGAGTGAAGAAGT  
ATTCGGTATGTAAAGCTCTATCAGTAGGGAAGATAATGACGGTACCTACATAAGAAGCC  
CCGGCTAAATACGTG

>5813 len=135 tot-seq=1

TGGGGAATATTGGACAATGGGCGCAAGCCTGATCCAGCCATGCCGCGTGAGTGAAGG  
CCTTAGGGTTGTAAAGCTCTTTCACCGGAGAAGATAATAACAGTATCCGGAGAAGAAGCC  
CCGGCTAACTTCATG

>5814 len=135 tot-seq=1

TGGGGAATATTGGACAATGGGCGCAAGCCTGATCCAGCCATGCCGCGTGAGTGAAGG  
CCTTAGGGTTGTAAAGCTCTTTCACCGATGAAGATAATGACGGTAATCAATTAGAAAGTC  
ACGGCTAACTACGTG

>5815 len=135 tot-seq=1

TGGGGAATACTGTACAATGGGGGAAACCCTGATGCAGCGACGCCACGTGAACGAAGAAGG  
TATTCGTATCGTAAAGTTCTGTCCTATGGGAAAATAATGACAGTACCATAGAAGAAGCT  
CCGGCTAAATACGTG

>5816 len=135 tot-seq=1

TGGGGAATATTGCACAATGGGCGAAAGCCTGATGCAGCGATGCCGCGTGAGGGAAGACGG  
TTTTCGGATTGTAAACCTCTGTCTTGTGGGACGATAATGACGGTACCACAGGAGGAAGCC  
ATGGCTAACTACGTG

>5817 len=135 tot-seq=1

TGGGGAATATTGCACAATGGGGGAAACCCTGATGCAGCAACGCCGCGTGAGCGATGAAGG  
CCTTCGGGTCGTAAAGCTCTGTCCTAAGGGAAGATAATGACGGTACCTTAGGAGGAAGCC  
CCGGCTAACTACGTG

>5818 len=135 tot-seq=1

TAGGGAATCTCCACAATGGACGCAAGTCTGATGCAGCGACGCCGCGTGAGCGAAGAAGG  
CTTTCGAGTCGTAAAGCTCTGTCCTATGAGAAGATAATGACGGTATCATAGGAAGAAGCC  
CTGGCTAAATACGTG

>5819 len=135 tot-seq=1

TAGGGAATCTCCACAATGGACGCAAGTCTGATGGAGCAACGCCGCGTGAGTGAAGAAGG  
GTTTCGAGTCGTAAAGCTCTGTCCTATGGGAAGATAATGACGGTACCATAGAAGAAAGCC  
CCGGCTAATTACGTG

>5820 len=135 tot-seq=1

TGGGGAATTTTGCACAATGGAGGAAACTCTGATGCAGCGACGCCGCGTGAACGAAGAAGG  
TCTTCGGATTGTAAAGTTCTGTCCTGGGTGAAGATAATGACGGTAATCAATTAGAAAGTC  
ACGGCTAACTACGTG

>5821 len=135 tot-seq=1

TAGGGAATCTCCGCAATGGACGCAAATCTGACGGAGCAACGCCGCGTGAACGATGAAGG  
TCTTCGGATCGTAAAGTTCTGTTGCAGGGGAAGATAATGACGGTACCCTGTGAGGAAGCC  
CCGGCTAATTCCGTG

>5822 len=135 tot-seq=1

TGGGGAATATTGCACAATGGGGGAAACCCTGATGCAGCGACGCCGCGTGGAGGAAGAAGG  
TCTTCGGATCGTAAAGTTCTGTTGCAGGGGAAGATAATGACGGTACCCTGTGAGGAAGCC  
CCGGCTAACTACGTG

>5823 len=135 tot-seq=1

TGGGGAATATTGCGCAACGGGGGAAACCCTGACGCAGCGACGCCGCGTGAGTGAAGAAGT

AGTTCGCTATGTAAAGCTCTATCAGCAGGGAAGATAGTGACGGTACCTGACTAAGAAGCT  
CCGGCTAAATACGTG

>5824 len=135 tot-seq=1

TGGGGGATATTGCACAATGGAGGAACTCTGATGCAGCGACGCCGCGTGAAGGAAGAAGT  
ATCTCGGTATGTAACTTCTATCAGCAGGGAAGATAGTGACGGTACCCGACTAAGAAGCC  
CCGGCTAACTAAGTG

>5825 len=135 tot-seq=1

TGGGGAATACTGCACAATGAGGGAAACCCTGATGCAGCGACGCCGCGTGAGCGGAGAAGT  
ATTTCCGGTATGTAAAGCTCTATCAGCAGGGAAGAAAATGACGGTACCTGACTAAGAAGCA  
CCGGCTAAATACGTG

>5826 len=135 tot-seq=1

TGGGGAATATTGCACAATGGGGGAAACCCTGATGCAGCGACGCCGCGTGAGGGAAGAAGG  
TTTTCCGATTGTAAACCTCTGTCTTGTGGGACGATAATGACGGTACCACAGGAGGAAGCC  
ATGGCTAACTACGTG

>5827 len=135 tot-seq=1

TAGGGAATCTTCCACAATGGACGCAAGTCTGATGGAGCAACGCCGCGTGCGGGATGAAGG  
CCTTCGGGTTGTAAACCGCTTTCAGCAGGGAAGACATCGACGGTACCTGCAGAAGAAGCC  
CCGGCTAACTACGTG

>5828 len=135 tot-seq=1

TGGGGAATATTGCACAATGGGGGAAACCCTGATGCAGCGACGCCGCGTGAGCGATGAAGT  
ATCTCGGTATGTAACTTCTATCAGCAGGGAAGATAGTGACGGTACCTGACTAAGAAGCC  
CCGGCTAGCTACGCA

>5829 len=135 tot-seq=1

TGGGGAATATTGCACAATGGGGGAAACCCTGATGCAGCGACGCCGCGTGGAGGAAGAAGG  
TCTTCGGATTGTAACTCCTGTTGTTGAGGAAGATAATGACGGTACCCGCAGAAGAAGCA  
CCGGCTAACTCCGTG

>5830 len=135 tot-seq=1

TGGGGAATATTGCACAATGGGGGAAACCCTGATGCAGCGACGCCGCGTGGAGGAAGAAGG  
TCTTCGGATTGTAACTCCTGTTGTTGAGGAAGATAATGACGGTATTTAACCAGAAAGCC

ACGGCTAACTACGTG

>5831 len=135 tot-seq=1

TGGGGAATATTGCGCAATGGGGGAAACCCTGACGCAGCGACGCCGCGTGCGGGATGAAGG

TATTCGTATCGTAAAGTTCTGTCCTATGGGAAGATAATGACAGTACCATAGAAGAAAGCT

CCGGCTAAATACGTG

>5832 len=135 tot-seq=1

TGGGGAATATTGCGCAATGGGGGAAACCCTGACGCAGCAACGCCGCGTGATTGAAGAAGT

ATCTCGGTATGTAAAGCTCTATCAGCAGGGAAGAAAATGACGGTACCTGACTAAGAAGCC

CCGGCTAACTACGTG

>5833 len=135 tot-seq=1

TGGGGAATATTGCACAATGGGGGAAACCCTGATGCAGCGACGCCGCGTGAACGAAGAAGG

TATTCGTATCGTAAAGTTCTGTCCTATGGGAAGATAATGACAGTACTCAACAAGGAAGTG

ACGGCTAACTACGTG

>5834 len=135 tot-seq=1

TAGGGAATCTTCCACAATGGACGAAAGTCTGATGGAGCAACGCCGCGTGAGTGAAGAAGT

ACCTCGGTATGTAAAGCTCTATCAGCAGGGAAGAAAAGTACAGTACCTGACTAAGAAGCC

CCGGCTAACTACGTG

>5835 len=135 tot-seq=1

TGAGGAATCTTCCACAATGGGGGCAACCCTGATGGAGCAACGCCGCGTGCAGGATGAAGG

CCTTCGGGTTGTAAACTGCTTTTATTTGTGAAGAATATGACGGTAACAAATGAATAAGGG

TCGGCTAACTACGTG

>5836 len=135 tot-seq=1

TAAGGAATCTTCCACAATGGACGAAAGTCTGATGGAGCAACTCCGCGTGCAGGATGAAGG

CCTTCGGGTTGTAAACTGCTTTTATTTGTGAAGAATATGACGGTAACAAATGAATAAGGG

TCGGCTAACTACGTG

>5837 len=135 tot-seq=1

GCGCGCAAATTACCAATCCCGACACGGGGAGGTAGTGACAATAAATAACAATATAGGGC

TCTATTGGGTCTTATAATTGGAATGAGTACAATTTAAATCCCTTAACGAGGAACAACCTGG

AGGGCAAGTCTGGTG

>5838 len=135 tot-seq=1

TCGGGAATATTGCGCAATGGAGGAAACTCTGACGCAGTGACGCCGCGTGCAGGAAGAAGG  
TTTTCGGATTGTAAACTGCTTTAGACAGGGAAAGATGATGACAGTACCTGTAGAATAAGCT  
CCGGCTAACTACATG

>5839 len=135 tot-seq=1

TGGGGGATATTGCACAATGGGGGAAACCCTGATGCAGCGACGCCGCGTGGAGGAAGACGG  
CCTTCGGGTTGTAAACTCCTGTCTTCAGGGACGAAACTGACGGTACCTAAGGAGGAAGCA  
CCGGCTAACTACGTG

>5840 len=135 tot-seq=1

TGGGGAATACTGCACAATGGGGGAAACCCTGATGCAGCGACGCCGCGTGAGTGAAGAAGT  
ATTCGGTATGTAAACTTCTATCAGCAGAGAAGAAACTGACGGTACCTGACTAAGAAGCA  
CCGGCTAAATACGTG

>5841 len=135 tot-seq=1

TGGGGAATATTGCACAATGGGGGAAATCCTGATGCAGCGACGCCGCGTGAGCGATGAAGT  
ATTCGGTATGTAAAGCTCTATCAGCAGGGAAGAAAATGACGGTACCTGACTAAGAGGCC  
CTGGCTAACTACGTG

>5842 len=135 tot-seq=1

TGGGGGATATTGCACAATGGGGGGAACCCTGATGCAGCGACGCCGCGTGAGTGAAGAAGT  
CATTCGTGATGTAAAGCTCTATCAGCAGGGACGAAAATGACGGTACCTGACTAAGAAGCC  
CCGGCTAACTACGTG

>5843 len=135 tot-seq=1

GCATTATAAATGTGGCCCCAACTGCCTTTTCTCCAACCTCACGCATTTACTGCCTCCC  
TGCTGGTCTCCACCCACAGCCGCTCTTCCCGGGAACCTGGAGCTGCCCTCCCGGACCCCA  
GGTGGTCCCCTCCTG

>5844 len=135 tot-seq=1

GCCAAGGTGTAATGTCCTACAGAGACCAATACAAGGAGGCTCTCAACATGCCAGCAGAAA  
AGACAGAGGTGTCAGTTACTTACCGAACCTTCTCAAGTAGCTGGTGATAGTGCTGGAGCT  
CCAGGGTGACATGGG

>5845 len=135 tot-seq=1

TGGGGAATATTGCGCAATGGGCGAAAGCCTGACGCAGCGACGCCGCGTGCGGGATGGAGG  
CCCTCGGGTCGTAAACCGCTTTCGGCAGGGACGATTGTGACGGTACCTGCATAAGAAGCC  
CCGGCTAAATACGTG

>5846 len=135 tot-seq=1

TAGGGAATTTTTCGCAATGGGCGAAAGCCTGACGCAGCAACGCCGCGTGAACGAGACGCC  
CTTCGGGGTGTAAGTTTTGTGACGAGGGACGAAAGATGACGGTACCTACAGAGGAAGCA  
CCGGCTAACTCCGTG

>5847 len=135 tot-seq=1

TGGGGAATCTTGACAATGGGCGCAAGCCTGATCCAGCCATGCCGCGTGAGTGACGAAGG  
CCTTAGGGTTGTAAAGCTCTTTTAGCAGGGAAGATAATGACGGTACCTGCAGAATAAGCC  
CCGGCTAACTCCGTG

>5848 len=135 tot-seq=1

GCGCGCAAATTACCAATCCCGACACGGGGAGGTAGTGACAATAAATAACAATATGGGGC  
TCTTTCGGGTCTCATAATTGGAATGAGTACAATTTAAATCTCTTAACGAGGAACAATTGG  
AGGGCAAGTCTGGTG

>5849 len=135 tot-seq=1

TGGGGAATATTGCGCAATGGGGGAAACCCTGACGCAGCAACGCCGCGTGAAGGATGAAGG  
TTTTCGGATTGTAACTTCTTTGATTGGGGACGATAATGACGGTACCCAAAAACAAGCC  
ACGGCTAACTACGTG

>5850 len=135 tot-seq=1

TGGGGAATATTGACAATGGGGGCAACCCTGATCCAGCAATGCCGCGTGAGTGAAGAAGG  
CCTTAGGGTTGTAAAGCTCTTTCGACGGGGACGATGATGACGGTACCCGTAGAAGAAGCC  
CCGGCTAACTCCGTG

>5851 len=135 tot-seq=1

TGGGGAATATTGCGCAATGGGGGAAACCCTGATGCAGCGACGCCGCGTGAGCGAAGAAGG  
CCTTCGGGTCGTAAACTCTTTTATATGGGAAGATAATGACGGTACCATAAGAATAAGGA  
CCGGCTAATTACGTG

>5852 len=135 tot-seq=1

TGGGGGATATTGCACAATGGAGGCAACTCTGATGCAGCAACGCCGCGTGAACGAAGAAGG

TATTCGTATCGTAAAGTTCTGTCCTATGGGAAGATAATGACAGTACCATAGAAGAAAGCT  
CCGGCTAAATACGTG

>5853 len=135 tot-seq=1

TGGGGAATATTGCACAATGGACGAAAGTTTGATGCAGCGACGCCGCGTGAGCGATGAAGG  
CTTTCGAGTCGTAAAGCTCTGTCCTATGGGAAGATAATGACGGTACCATAGAAGAAAGCC  
CCGGCTAATTACGTG

>5854 len=135 tot-seq=1

TGGGGAATATTGCACAATGGACGAAAGTTTGATGCAGCGACGCCGCGTGAGCGAAGAAGG  
CCTTCGGGTCGTAAAGCTCTTTTATATGGGAAGATAATGACGGTACCATAAGAAAAAGCC  
CCGGCTAACTACGTG

>5855 len=135 tot-seq=1

TAGGGAATCTTCGGCAATGGACGGAAGTCTGACCGAGCAACGCCGCGTGAGTGAAGAAGG  
TTTTCGAGTCGTAAAGCTCTGTCCTATGAGAAGATAATGACGGTATCATAGGAGGAAGCC  
CTGGCTAAATACGTG

>5856 len=135 tot-seq=1

TGGGGAATTTTGCACAATGGAGGAAACTCTGACGCAGCGACGCCGCGTGAACGAAGAAGG  
TCTTCGATTGTAAAGTTCTGTCCTGGGTGAAGATAATGACGGTAACTTACCAGAAAGGG  
ACGGCTAACTACGTG

>5857 len=135 tot-seq=1

TGGGGAATATTGCACAATGGAGGAAACTCTGATGCAGCGACGCCGCGTGAGCGATGAAGG  
CTTTCGAGTCGTAAAGCTCTGTCCTATGGGAAGATAATGACGGTACCATATGAATAAGGA  
CCGGCTAATTCCGTG

>5858 len=135 tot-seq=1

TGGGGAATATTGCGCAATGGGGGAAACCCTGACGCAGCGACGCCGCGTGAGCGAAGAGGG  
CTTTCGAGTCGTAAAGCTCTGTCCTATGAGAAGATGATGACGGTATCATAGGAGGAAGCC  
CTGGCTAAATACGTG

>5859 len=135 tot-seq=1

TGGGGAATATTGGGCAATGGGCGCAAGCCTGACCCAGCAACGCCGCGTGAAGGAAGAAGG  
CTTTCGGGTTGTAACTTCTTTTATCAGGGACGATAATGACGGTACCTGATGAATAAGCT

CCGGCTAACTACGTG

>5860 len=135 tot-seq=1

TGGGGAATCTTCCGCAATGGACGAAAGTCTGACGGAGCAACGCCGCGTGAGTGATGACGG  
CTTTCGAGTCGTAAAGCTCTGTCCTATGGGAAGATAATGACGGTACCATAGAAGAAAGCC  
CCGGCTAATTACGTG

>5861 len=135 tot-seq=1

TGGGGAATATTGGACAATGGAGGAACTCTGATCCAGCAATTCTGTGTGTGTGAAGAAGG  
TTTTAGGACTGTAAACACTTTTAGTAGGGAAGATAATGACGGTACCGGGAGAATAAGCC  
CCGGCTAACTCCGTG

>5862 len=135 tot-seq=1

TGGGGAATATTGCACAATGGAGGAACTCTGATGCAGCGACGCCGCGTGAATGAAGAAGG  
CTTTCGAGTCGTAAAATTCTGTCCTAGGGGACGATAATGACGGTACCCTAGGAGGAAGCC  
CCGGCTAATTACGTG

>5863 len=135 tot-seq=1

TGAGGAATATTGGTCAATGGGGGGAACCCTGATGCAGCAACGCCGCGTGAGTGATGAAGG  
TTTTCGGATCGTAAAGCTCTGTCTTTGGGGAAGATAATGACGGTACCCAAGGAGGAAGCC  
ACGGCTAACTACGTG

>5864 len=135 tot-seq=1

TGGGGAATTTTGGACAATGGGGGCAACCCTGATGCAGCGACGCCGCGTGAACGAAGAAGG  
TATTCGTATCGTAAAGTACTGTCCTATGGGAAGATAATGACAGTACCATAGAAGAAAGCT  
CCGGCTAAATACGTG

>5865 len=135 tot-seq=1

TGGGGAATATTGCACAATGGGGGAAACCCTGATGCAGCGACGCCGCGTGGACGAGGAAGT  
ACCTCGGTATGTAAAGTCCTATCAGCAGGGAAGAAAGTGACAGTACCTGACTAAGAAGCC  
CCGGCTAACTACGTG

>5866 len=135 tot-seq=1

TGGGGAATCTTGCACAATGGGCGAAAGCCTGATGCAGCGACGCCGCGTGCGGGATGAAGG  
CCTTCGGGTTGTAAACCGCTTTCAGCAGGGACGAAAATGACGGTACCTTACTAAGAAGCT  
CCGGCTAAATACGTG



>5867 len=135 tot-seq=1

TGGGGAATATTGCACAATGGGGGAAACCCTGATGCAGCGACGCCGCGTGGGTGAGGAAGT  
ACCCCGGTATGTAAAACCCCTTCGGCAGGGAAGAAAATGACGGTACCTGGCGAAGAAGCC  
CCGGCTAACTACGTG

>5868 len=135 tot-seq=1

CGGAAGGCTGAACCAGCCAAGTCGCGTGAGGGAATAAGGCCCTACGGGTCGTAAACCTCT  
TTTGTGGGGAGCAAATTCGCCACGTGTGGCGGAGTCGAGAGTACCCGAAGAAAAAGCA  
TCGGCTAACTCCGTG

>5869 len=135 tot-seq=1

TGGGGGATATTGCACAATGGGGGAAACCCTGATGCAGCGACGCCGCGTGAGCGATGAAGT  
ATTCGGTATGTAAAGCTCTATCAGCAGGAAAGAAGATGACGGTACCTGACTAAGAAGCC  
CCGGCTAAATACGTG

>5870 len=135 tot-seq=1

TGGGGAATATTGCACAATGGGCGCAAGCCTGATGCAGCGATGCCGCGTGGAGGAAGAAGG  
TTTTCGGATTGTAACTCCTGTCTTAAGGGACGATAATGACGGTACCTTAGGAGGAAGCT  
CCGGCTAACTACGTG

>5871 len=135 tot-seq=1

TGGGGAATATTGCACAATGGGGGAAACCCTGATGCAGCGACGCCGCGTGAAGGATGAAGT  
ATTCGGTATGTAAAGCTCTATCAGAAGGGAAGAAAATGACGGTACCTTACTAAGAAGCT  
CCGGCTAAATACGTG

>5872 len=135 tot-seq=1

TCGGGAATATTGCGCAATGGAGGAACTCTGACGCAGTGACGCCGCGTATAGGAAGAAGG  
TTTTCGGATTGTAACTATTTTAGACAGGGAAGGAATTGACAGTACCTGTAGAATAAGCT  
CCGGCTAACTACGTG

>5873 len=135 tot-seq=1

TGGGGAATATTGCGCAATGGGGGCAACCCTGACGCAGCAACGCCGCGTGAAGGATGACGG  
TCTTCGGATTGTAACTTCTTTAAGTGTGGAAGAAATTGACGGTACACACAGAATAAGCC  
ACGGCTAACTACGTG

>5874 len=135 tot-seq=1

TGGGGGATATTGCACAATGGGGGAAACCCTGATGCAGCGACGCCGCGTGGGCGATGGAGT  
ACCCCGGTACGTAAAGCCCTGTCAGCAGGGAAGACAATGACGGTACCTGACCAAGAAGCC  
CCGGCTAACTACGTG

>5875 len=135 tot-seq=1

TGGGGAATATTGCACAATGGGCGAAAGCCTGACGCAGCGACGCCGCGTGAGCGAAGAAGT  
ATTTCCGGTATGCAAAGCCCTACCAGAAGGGAAGAAAATGACGGTACCTTACTAAGAAGCT  
CCGGCTAAATACGTG

>5876 len=135 tot-seq=1

TGGGGAATATTGCGCAATGGGGGAAACCCTGACGCAGCGACGCCGCGTGCGGGATGAAGT  
ATTTCCGGTATGTAAAGCTCTATCAGCAGGGAAGAAGATGACGGTACCTGAATAAGAAGCC  
CCGGCTAACTACGTG

>5877 len=135 tot-seq=1

TGGGGAATATTGCACAATGGGGGAAACCCTGATGCAGCGACGCCGCGTGGGTGAAGGAGT  
ATTTCCGGTATGTAAAGCCCTATCAGCAGGGAAGATAATGACGGTACCTGGCTAAGAAGCC  
CCGGCTAACTACGTG

>5878 len=135 tot-seq=1

TAGGGAATATTGCACAATGGGGGCAACCCTGATGCAGCGACGCCGCGTGAGCGATGGAGT  
ACTTCGGTATGTAAAGCTCTGTCAGCAGGGAAGACATTGACGGTACCTGACCAAGAAGCC  
CCGGCTAAATACGTG

>5879 len=135 tot-seq=1

TGGGGAATATTGGACAATGGGGGAAACCCTGATCCAGCGACGCCGCGTGAGTGAAGAAGT  
ATTTCCGGTATGTAAACTTCTATCAGCAAGGAAGAAAATGACGGTACTTGACTAAGAAGCC  
CCGGCTAAATACGTG

>5880 len=135 tot-seq=1

TGGGGAATATTGGACAATGGGGGAAACCCTGATCCAGCGACGCCGCGTGAGGGAAGAAGG  
TTTTCCGATTGTAAACCTCTGTCTTAAGGGACGATAATGACGGTACCTTAGGAGGAAGCT  
CCGGCTAACTACGTG

>5881 len=135 tot-seq=1

TGGGGAATATTGCACAATGGGCGAAAGCCTGATGCAGCAACGCCGCGTGAGTGATGAAGG

CCTTCGGGTTGTAAAGCTCTGTCTTCTGGGACGATAATGACGGTACCAGAGGAGGAAGCC  
ACGGCTAACTACGTG

>5882 len=135 tot-seq=1

TGGGGAATATTGCGCAATGGGCGAAAGCCTGACGCAGCAACGCCGCGTGCGGGATGACGG  
CCTTCGGGTTGTAAACCGCTTTCAGCAGGGACGAAACTGACGGTACCTGCAGAAGAAGCA  
CCGGCTAACTACGTG

>5883 len=135 tot-seq=1

TGGGGAATATTGCACAATGGGGGAAACCCTGATGCAGCGACGCCGCGTGAGTGAAGAAGT  
ATTCGGTATGTAAAGCTCTATCAGCGGGGAAGAAGATGACAGTACCCGACCAAGAAGCC  
CCGGCTAACTACGTG

>5884 len=135 tot-seq=1

TGGGGAATATTGCACAATGGGGGAAACCCTGATGCAGCGACGCCGCGTGAGCGAAGAAGC  
GCTTCGGCGCGTAAAGCTCTATCAGCAGGGAAGAAAGCGACAGTACCTGACTAAGAAGCC  
CCGGCTAACTACGTG

>5885 len=135 tot-seq=1

TGGGGGATATTGCACAATGGGGGAAACCCTGATGCAGCGACGCCGCGTGAGTGAAGAAGT  
GCTTCGGCATGTAAAGCCCTGTCAGCAGGGAAGAAGGTGACGGTACCTGACCAAGAAGCC  
CCGGCTAACTACGTG

>5886 len=135 tot-seq=1

TGGGGGATATTGCACAATGGGGGAAACCCTGATGCAGCAACGCCGCGTGTGGGAAGAAGG  
TTTTCGGATTGTAAACCACTGTTCTCAGGGACGATAATGACGGTACCTGAGGAGAAAGT  
CCGGCTAACTACGTG

>5887 len=135 tot-seq=1

TGGGGAATATTGCGCAATGGGGGAAACCCTGACGCAGCCATGCCGCGTGAGTGATGAAGG  
CCCTAGGGTTGTAAAGCTCTTCAACGGTGAAGATAATGACGGTAACCGTAGAAGAAGCC  
CCGGCTAACTTCGTG

>5888 len=135 tot-seq=1

TGGGGAATCTTGCAGCAATGGGCGAAAGCCTGACGCAGCAACGCCGCGTGGGGGATGAAGG  
CTTTCGGGTTGTAAACCCCTTTCAGCAGGGACGATTATGACGGTACCTGCAGAAGAAGGA

CCGGCCAACACTACGTG

>5889 len=135 tot-seq=1

TGAGGAATATTGGACAATGGGGCGAAAGCCTGATCCAGCAATACCGCGTGAGTGAAGAAGG  
CCTTCGGGTTGTAAAGCTCTTTCAGCAGGGAAAATAATGATGGTACCTGCAAAAAGAAGTC  
CCGGCTAACTCCGTG

>5890 len=135 tot-seq=1

TGGGGAATATTGCACAATGGGGGGAACCCTGATGCAGCGACGCCGCGTGAGGGAAGAAGG  
TATTCGTATTGTAAACCTCTGTCTTCGGGGACGATAATGACGGTACCCGAGGAGGAAGCA  
CCGGCTAACTACGTG

>5891 len=135 tot-seq=1

TGGGGAATATTGGACAATGGGGCACAAGCCTGATCCAGCCATGCCGCGTGAGTGATGAAGG  
CCTTAGGGTTGTAAAGCTCTTTTGTTCAGGGGAAGATGATGACGGTACCTGAAGAATAAGCA  
CCGGCTAACTTCGTG

>5892 len=135 tot-seq=1

TAGGGAATCTTCGGCAATGGGGGGAACCCTGACCGAGCAACGCCGCGTGAGCGAAGAAGG  
CCTTCGGGTCGTAAAGCTCTTTTATATGGGAAGATAATGACGGTACCATAAGAAAAAGCC  
CCGGCTAACTACGTG

>5893 len=135 tot-seq=1

TGGGGAATATTGGACAATGGGGCGAAAGCCTGATCCAGCCATGCCGCGTGAACGATGAAGG  
TCTTCGGATCGTAAAGTTCTGTTGCAGGGGAAGATAATGACGGTACCCTGTGAGGAAGCC  
CCGGCTAACTACGTG

>5894 len=135 tot-seq=1

TGGGGAATATTGCACAATGGGGCGCAAGCCTGATGCAGCGACGCCGCGTGAGGGATGGAGG  
TATTCGTATCGTAAAGTTCTGTCTATGGGAAGATAATGACAGTACCATAGAAGAAAGCT  
CCGGCTAAATACGTG

>5895 len=135 tot-seq=1

TGAGGAATATTGCACAATGGGGGAAACCCTGATGCAGCAACGCCGCGGAGTGAAGAAGT  
ATTCGGTACGTAAAGCCCTATCAGCAGGAAAGAAAATGACGGTACCTGACTAAGAAGCC  
CCGGCTAACTACGTG

>5896 len=135 tot-seq=1

TGGGGAATATTGGACAATGGGCGCAAGCCTGATCCAGCCATGCCGCGTGAGCGATGAAGG  
CCTTAGGGTTGTAAAGCTCTTTCACCGATGAAGATAATGACGGTAGTCGGAGAAGAAGCT  
CCGGCTAAATACGTG

>5897 len=135 tot-seq=1

TGGGGGATATTGCACAATGGGGGCAACCCTGATGCAGCGACGCCGCGTGAGCGATGAAGT  
ATTTCCGGTATGTAACTTCTATCAGCAAGGAAGAAAATGACGGTACTTGACTAAGAAGCC  
CCGGCTAAATACGTG

>5898 len=135 tot-seq=1

TGGGGAATATTGCACAATGGGCGAAAGCCTGATGCAGCGACGCCGCGTGAGTGATGAAGG  
CCTTAGGGTTGTAAAGCTCTATCAGAAGGGAAGAAAATGACGGTACCTTACTAAGAAGCT  
CCGGCTAAATACGTG

>5899 len=135 tot-seq=1

TGGGGAATATTGCGCAATGGGCGAAAGCCTGACGCAGCGACGCCGCGTGAGGGATGAAGT  
ATTTCCGGTATGTAAAGCTCTATCAGCAGGGAAGAAAATGACGGTACCTGACTAAGAAGCC  
CCGGCTAACTACGTG

>5900 len=135 tot-seq=1

TGGGGAATATTGCACAATGGAGGGAACCTCTGATGCAGCGACGCCGCGTGAACGAAGAAGG  
CTTTCGAGTCGTAAAGTTCTTTTATATGGGAAGATAATGACGGTACCTTACTAAGAAGCT  
CCGGCTAAATACGTG

>5901 len=135 tot-seq=1

TGGGGGATATTGGACAATGGGGGGAACCCTGATCCAGCGACGCCGCGTGAGTGAAGAAGT  
AATTCGTTATGTAAAGCTCTATCAGCAGGGAAGAAAATGACGGTACCTGAGTAATAAGCC  
CCGGCTAACTACGTG

>5902 len=135 tot-seq=1

TAAGGGATATTGCACAATGGGGGAAACCCTGATGCAGCGACGCCGCGTGAGCGATGAAGT  
ATCTCCGGTATGTAAAGCTCTATCAGCAGGGAAGAAAATGACAGTACCTGACTAAGAAGCC  
CCGGCTAACTACGTG

>5903 len=135 tot-seq=1

TGGGGAATTTTGCGCAATGGGCGAAAGCCTGACGCAGCAACGCCGCGTGCGGGACGAAGG  
CCTTCGGGTTGTAAACCGCTTTCAGCAGGGAAGAGAACGACGGTACCTGCAGAAGAAGCT  
CCGGCTAACTACGTG

>5904 len=135 tot-seq=1

TGAGGAATATTGCACAATGGGGGAAACCCTGATGCAGCAACGCCGCGTGAGGGAAGACGG  
TTTTCGGATTGTAAACCTCTGTCCTTAGTGACGATAATGACGGTAGCTAAGGAGGAAGCC  
ACGGCTAACTACGTG

>5905 len=135 tot-seq=1

TGGGGGATATTGCACAATGGGGGGGACCCTGATGCAGCGACGCCGCGTGAGTGAAGAAGT  
ATTCGGTACGTAAAGCTCAATCAGCAGGGAAGAAAATGACGGTACCTGACTAAGAAGCC  
CCGGCTAACTACGTG

>5906 len=135 tot-seq=1

TGGGGCATATTGCACAATGGGGGGAACCCTGATGCAGCGACGCCGCGTGGGCGAGGAAGT  
ATTCGGTATGTAAAGCTCTATCAGCAGGGAAGAAAGTGACGGTACCTGAAAAAGAAGCT  
CCGGCTAAATACGTG

>5907 len=135 tot-seq=1

TGGGGAATCTTGACAATGGGGGAAACCCTGATCCAGCCATGCCGCGTGAGTGAAGAAGG  
CCTTCGGGTTGTAAAGCTCTTTTGTTCAGGGACGATAATGACGGTACCTGAAGAATAAGCC  
CCGGCAAACCTTCGTG

>5908 len=135 tot-seq=1

TGAGGAATATTGGTCAATGGACGAGAGTCTGAACCAGCCAAGTAGCGTGCAGGATGACGG  
CCCTATGGGTTGTAAACTGCTTTTGTGGGACTAATCGACATTACCATAACGAATAAGGA  
CCGGCTAATTACGTG

>5909 len=135 tot-seq=1

TGAGGAATATTGGTCAATGGGGGAAACCCTGATGCAGCGACGCCGCGTGGGTGAAGGAGC  
ACCTCGGTGCGTAAAGCCCTATCGGCAGGGAAGAAACAGACGGTACCTGACTAAGAAGCC  
CCGGCTAACTACGTC

>5910 len=135 tot-seq=1

TGAGGGATATTGGTCAATGGGGGAAACCCTGAACCAGCAACGCCGCGTGAGGGATGACGG

CCTTCGGGTTGTAAACCTCTGTCCTCTGTGAAGATAATGACGGTAGCAGAGGAGGAAGCT  
CCGGCTAACTACGTG

>5911 len=135 tot-seq=1

TGGGGAATATTGCACAATGGGGGAAACCCTGATGCAGCGACGCCGCGTGAGTGAAGACGG  
CCTTCGGGTTGTAAAGCTCTGTTGACGGGGACGATAATGACGGTACCCGTTAAGAAAGCC  
ACGGCTAACTACGTG

>5912 len=135 tot-seq=1

TGGGGAATATTGGACAATGGGGGGTACCCTGATCCAGCCATGCCGCGTGAGTGATGACGG  
CCTTCGGGTTGTAAAGCTCTTTTACACGGGAAGATAATGACGGTACCGTGAGAATAAGCA  
CCGGCTAACTTCGTG

>5913 len=135 tot-seq=1

TGGGGGATATTGCACAATGGAGGCAACTCTGATGCAGCAACGCCGCGTGAGTGAAGAAGG  
CTTTCGAGTCGTAAACTCTGTCGTATGGGAAGAAAATGACGGTACCTTACTAAGAAGCT  
CCGGCTAAATACGTG

>5914 len=135 tot-seq=1

TGGGGAATCTTCCGCAATGGACGAAAGTCTGATGCAGCGACGCCGCGTGAGTGAAGAAGT  
ATTTCCGGTATGTAAAGCTCTATCAGCAGGGAAGAAGATGACGGTACCTGAATAAGAAGCC  
CCGGCTAACTACGTG

>5915 len=135 tot-seq=1

TGGGGGATATTGCACAATGGAGGCAACTCTGATGCAGCAACGCCGCGTGAGTGAAGAAGT  
ATTTCCGGTATGTAAAGCTCTATCAGAAGGGAAGAAAATGACGGTACCTTACTAAGAAGCT  
CCGGCTAAATACGTG

>5916 len=135 tot-seq=1

TGGGGAATATTGCACAATGGGGGAAACCCTGATGCAGCAACGCCGCGTGAGTGGTGAAGG  
TATTCGGATCGTAAAGCTCTGTCTGTGGGGAAGATAATGACGGTACCCAAGGAGGAAGCC  
ACGGCTAACTACGTG

>5917 len=135 tot-seq=1

TGGGGAATATTGCACAATGGGGGAAACCCTGATGCAGCGACGCCGCGTGAAGGAAGACGT  
ATTTCCGGTATGTAAACTTCTATCAGCAAGGAAGATGATGACGGTACCCAAGGAGGAAGCC

ACGGCTAACTACGTG

>5918 len=135 tot-seq=1

TGGGGAATATTGCGCAATGGGGGAAACCCTGACGCAGCGACGCCGCGTGAGTGATGAAGG

TTTTCGGATCGTAAAGCTCTGTCTTTGGGGAGGATAATGACGGTACCCAAGGAGGAAGCC

ACGGCTAACTACGTG

>5919 len=135 tot-seq=1

TAGGGAATCTTCCACAATGGGCGCAAGCCTGATGGAGCAACACCGCGTGAGTGAAGAAGG

GTTTCGGCTCGTAAAGCTCTGTTGTTGGAGAAGATAATGACGGTACCCAAGGAGGAAGCC

ACGGCTAACTACGTG

>5920 len=135 tot-seq=1

TAGGGAATTTTCGTCAATGGGGGGAACCCTGAACGAGCAATGCCGCGTGAGTGATGAAGG

TTTTCGGATCGTAAAGCTCTGTCTTTGGGGAAGATAATGACGGTACCCAAGGAGGAAGCC

ACGGCTAACTACGTG

>5921 len=135 tot-seq=1

TGGGGAATATTGGACAACGGGCGCAGGCCTGATCCAGCCATGCCGCGTGAGTGATGAAGG

CCTTAGGGTTGTAAAACCTTTACCCGATGAAGATAATGACGGTAGTCGGAGAAGAAGCC

CCGGCTAACTTCGTG

>5922 len=135 tot-seq=1

TGGGGAATATTGCACAATGGGGGGAACCCTGATGCAGCAACGCCGCGTGAGTGATGAAGG

TTTTCGGATCGTAAACCTCTGTCTTGAGGGACGATAATGACGGTACCTCAGGAGGAAGCT

CCGGCTAACTACGTG

>5923 len=135 tot-seq=1

TGAGGGATATTGGTCAATGGGGGAAACCCTGAACCAGCAACGCCGCGATGAGGGAAGACGG

TCTTCGGATTGTAAACCTTTGTCCTCCGTGAAGATAATGACGGTAGCAGAGGAGGAAGCT

CCGGCTAACTACGTG

>5924 len=135 tot-seq=1

TGGGGAATCTTGACAATGGGGGAAACCCTGATCCAGCCATTCCGCGTGGATGATGAAGG

CCTTAGGGTTGTAAAATCCTTTACGCAGGGAAGATAATGACTGTACCTGCAGAAGAAGCC

CCGGCTAACTCCGTG



>5925 len=135 tot-seq=1

TGGGGAATATTGCGCAATGGGGGAAACCCTGATGCAGCAACGCCGCGTGAGTGATGAAGG  
CCTTCGGGTCGTAAAGCTCTTTGATCAGGGACGATAATGACGGTACCTGAAAAACAAGCC  
ACGGCTAACTACGTG

>5926 len=135 tot-seq=1

TCGAGAATCATTACAATGGGGGAAACCCTGATGCAGCGACGCCGCGTGAAGGAAGAAGT  
ATTTCCGGTATGTAACTTCTATCAGCAGGGAAAGAAAATGACGGTACCTGAGTAAGAAGCC  
CCGGCTAACTACGTG

>5927 len=135 tot-seq=1

TGGGGGATATTGCACAATGGGGGAAACCCTGATGCAGCAATGCCGCGTGAGGGAAGAAGG  
TCTTCGGATTGTAAACCTAAGTAGCCAGGGACGATAATGACGGTACCTGGAGAGTAAGCT  
CCGGCTAACTACGTG

>5928 len=135 tot-seq=1

TAGGGAATCTCCGCAATGGGGGAAACCCTGATGCAGCGACGCCGCGTGGAGGAAGAAGG  
TTTTCCGGATTGTAACTCCTGTCGTTAGGGACGATAATGACGGTACCTAACAAGAAAGCA  
CCGGCTAACTACGTG

>5929 len=135 tot-seq=1

TGGGGAATATCGACAATGGGGGAAACCCTGATGCAGCGACGCCGCGTGAGCGAGGAAGT  
ACCTCCGGTATGTAAAGCTCTGTCAGCAGGGAAGAAAATGACGGTACCTGACTAAGAAGCC  
CCGGCTAACTACGTG

>5930 len=135 tot-seq=1

TGGGGAATATTGCACAATGGAGGAAACCCTGATGCAGCGACGCCGCGTGAGCGAAGAAGT  
ATCTCCGGTATGTAGAGCTCTATCAGCAGGGAGGATAATGACGGTACCTGACTAAGAAGCC  
CCGGCTAACTACGTG

>5931 len=135 tot-seq=1

GGGCCTGTCCCACTGCTGTGGGCTATGAGGTCTGACACACAGTTCCTGCTCAGTCAGT  
GCTTGCAGACAAAGACACGAGAGAGAGAAGCGTGGAGCCCAGCACCTCTCCTCCGCCTGG  
GATCGCCCTGAACCC

>5932 len=135 tot-seq=1

TGGGGAATTTTGGACAATGGGGGCAACCCTGATGCAGCGACGCCGCGTGAGTGAAGGAGT  
ATTCGGTATGTAAAGCTCTATCAGTAGGGAAGATAATGACGGTACCTACATAAGAAGCC  
CCGGCTAAATACGTG

>5933 len=135 tot-seq=1

TGGGGAATATTGGACAATGGGCGCAAGCCTGATCCAGCAATGCCGCGTGGGTGAAGAAGG  
TCTTCGGATTGTAAAGCCCTTTCGACAGGGACGATGATGACGGTACCTGTAGAAGAAGCC  
CCGGCTAACTTCGTG

>5934 len=135 tot-seq=1

TGGGGAATATTGGACAATGGAGGGAECTCTGATCCAGCAATTCTGTGTGTGTGAAGAAGG  
TTTTAGGACTGTAAAGCTCTATCAGCAGGGAAGAAGATGACGGTACCTGAATAAGAAGCC  
CCGGCTAACTACGTG

>5935 len=135 tot-seq=1

TAGGGAATCTCCACAATGGACGCAACTCTGATGCAGCGACGCCGCGTGAGTGAAGAAGT  
ATTCGGTATGTAAAGCTCTATCAGCAGGGGAGAAGATGACGGTACCTGAATAAGAAGCC  
CCGGCTAACTACGTG

>5936 len=135 tot-seq=1

TAGGGAATCTCCACAATGGACGCAAGTCTGATGGAGCAACGCCGCGTGAACGAAGAAGT  
ACCTCGGTATGTAAAGTTCTATCAGCAGGGAAGAAAATGACGGTACCTGACTAAGAAGCC  
CCGGCTAACTACGTG

>5937 len=135 tot-seq=1

TGGGGAATATTGCACAATGGACGGAAGTTTGTGATGCAGCGACGCCGCGTGCGGGATGAAGG  
CCTTCGGGTTGTAAACCGCTTTCAGCAGGGAAGACATCGACGGTACCTGCAGAAGAAGCC  
CCGGCTAACTACGTG

>5938 len=135 tot-seq=1

TGGGGAATATTGGACAATGGGCGAAAGCCTGATCCAGCAATGCCGCGTGAGTGATGAAGG  
CCTTAGAGTTGTAAAGCTCTTTTACTGGGGATGATAATGACAGTACCCAGAGAATAAGCT  
CCGGCTAACTCCGTG

>5939 len=135 tot-seq=1

AGTCTGATGGAGCAACGCCGCGTGAGTGAAGAAGGGTTTCGGCTCGTAAAGCTCTGTTGT

TGGTGAAGAAGGACAGGGATAGTAACTGTACTTTATTTGACGGTAGTCAATTAGAAAGTC  
ACGGCTAACTACGTG

>5940 len=135 tot-seq=1

TGGGGAATCTTGCACAATGGGGGGAACCCTGACGCAGCGACGCCGCGTGCGGGATGGAGG  
CCTTCGGGTCGTGAACCGCTTTCAGCAGGGACGAGTCTGACGGTACCTGCAGAAGAAGCC  
CCGGCTAACTACGTG

>5941 len=135 tot-seq=1

TGGGGAATCTTGACAATGGGCGAAAGCCTGATGCAGCGACGCCGCGTGAACGAAGAAGG  
TCTTCGATTGTAAAGTTCTGTCCTGGGTGAAGATAATGACGGTAACTCAGGAGGAAGCC  
CCGGCTAACTACGTG

>5942 len=135 tot-seq=1

GAAACAGGGCTGGACATGGAAATCCTCAATGGGGTGGAAATACTAGTGTGCAAAGATTAT  
AATTTAAGGGTAGCCTACGCGATTACCTGGTGTAAATGCGTTACCGGGGATGCCTCCA  
GCTATGGCATTCTC

>5943 len=135 tot-seq=1

GGGGAGAGGAAGGTCTAAGCTTGGCAAGAAAATGAGAAAGGCTGTGGCTGGCTGGAGCTG  
TGGGGAGTGTGTGGAGAGCAGTCGGAGAGTTGCCAGGGCCTGCTTAGCCTTGGTAAGGTC  
GTTTATCTCTCTATT

>5944 len=135 tot-seq=1

TGAGGAATATTGGTCAATGGGCGAGAGCCTGATGCAGCGACGCCGCGTGAGCGAGGAAGG  
CTTTCGAGTCGTAAAGCTCTGTCCTATGAGAAGATAATGACGGTATCATAGGAGGAAGCC  
CTGGCTAAATACGTG

>5945 len=135 tot-seq=1

TGGGGAATTTTGGACAATGGGGGCAACCCTGATCCAGCCATGCCGCGTGAGCGAAGAAGG  
CTTTCGAGTCGTAAAGCTCTGTCCTATGAGAAGATAATGACGGTATCATAGGAGGAAGCC  
CTGGCTAAATACGTG

>5946 len=135 tot-seq=1

GCGCGTAAATTACCCAATCCTGAAACAGGGAGGTAGTGACAATAAATAACAATGCCTGGC  
CTATCTAGGCTAGGCAATTGGAATGAGAACAATTTAAATCCCTTATCGAGGATCAATTGG

AGGGCAAGTCTGGTG

>5947 len=135 tot-seq=1

TAGGGAATCTTCCACAATGGACGCAAGTCTGATGGAGCAACGCCGCGTGAGTGAAGAAGG  
TTTTCGGATCGTAAAGCTCTGTTGTTGGTGAAGAAGGATAGAGGAATCAACCAGAAAGTC  
ACGGCTAACTACGTG

>5948 len=135 tot-seq=1

CCCAGACAGCTCCTCTGAGCAAGAGCTAAGGTAGAATGGGCTGAATAGGAAAAACAAAG  
CTAGTCCTGGGAATGGGCAACTTGCCATCTCACCATTCCCAAACCCCTAACCCCTCCACGG  
CCCAGCCACCAGGAG

>5949 len=135 tot-seq=1

TGGGGAATCTTGCCAATGGGCGAAAGCCTGAGGCAGCAACGCCGCGTGTGGGATGAAGG  
CCCTTGGGTTGTAAACCACTTTCAGCAGGGACGAAGATGACGGTACCTGCAGAAGAAGCC  
CCGGCCAACACTACGTG

>5950 len=135 tot-seq=1

TAGGGAATATTGCACAATGGGCGCAAGCCTGATGCAGCGACGCCGCGTGAGTGAAGAAGT  
ATCTCGGTATGTAAACTTCTATCAGCAGGGAAGATAGTGACGGTACCTGACTAAGAAGCC  
CCGGCTAACTACGTG

>5951 len=135 tot-seq=1

TGGGGAATATTGTACAATGGGCGAAAGCCTGATGCAGCGACGCCGCGTGAGCGAAGAAGT  
ATTTCTGGTATGTAAACTTCTATCAGCAGGGAAGAAAATGACGGTACCTGACTAAGAAGCC  
CCGGCTAACTACGTG

>5952 len=135 tot-seq=1

TGAGGAATATTCCACAATGGGCGAAAGCCTGATGGAGCAATGCCGCGTGCAGGATGAAGG  
CCCTCGGGTCGTAAACTGCTTTTATTAGAGAAGAATATGACGGTATCATAGGAGGAAGCC  
CTGGCTAAATACGTG

>5953 len=135 tot-seq=1

TGGGGGATATTGCACAATGGGGGAAACCCTGATGCAGCGACGCCGCGTGGAGGAAGAAGG  
TTTTCGGATTGTAAACTCCTGTCGTTAGGGACGATAATGACGGTACTCAACAAGGAAGTG  
ACGGCTAACTACGTG

>5954 len=135 tot-seq=1

TGGGGAATATTGGACAATGGGCGCAAGCCTGATCCAGCTATGCCGCGTGAGTGAGGAAGG  
CCTTAGGGTTGTAAACTCTTTTCAGTAGGGAAGATAATGACGGTACCTACAGAAGAAGTA  
CCGGCAAACCTCCGTG

>5955 len=135 tot-seq=1

CGGGGAATATTGCACAATGGGGGGAACCCTGATGCAGCAACGCCGCGTGAGTGAAGAAGT  
ATTTCCGGTATGTAAAGCTCTATCAGAAGGGAAGAAAATGACGGTACCTTACTAAGAAGCT  
CCGGCTAAATACGTG

>5956 len=135 tot-seq=1

TAGGGAATATTCCACAATGAGCGAAAGCTTGATGCAGCGACGCCGCGTGAGCGAAGAAGT  
ATTTCCGGTATGTAAAGCTCTATCAGAAGGGAAGAAAATGACGGTACCTTACTAAGAAGCT  
CCGGCTAAATACGTG

>5957 len=135 tot-seq=1

AATTCCTTGATGACGATTCAGCAGACATCACCTTTGATATGAGCGGGAGCCCTCGACTCC  
CAAGGCATAGCTCTCTCATAGATGAAATGTTCAAGGGCTCGGCTGGTCACAGCCCCCTGG  
CCACCCATTGTCTC

>5958 len=135 tot-seq=1

TCGAGAATCATTACAATGGGGGAAACCCTGATGGTGCGACGCCGCGTGGAGGAAGAAGG  
TTTTCGGATTGTAAACTCCTGTCGTTAGGGACGATAATGACGGTACCTAACAAGAAAGCA  
CCGGCTAACTACGTG

>5959 len=135 tot-seq=1

TGGGGAATATTGCACAATGGGCGAAAGCCTGATGCAGCAACGCCGCGTGAGCGATGAAGG  
TTTTCGGATCGTAAAGCTCTGTTCTGAGGGAAGATAGTGACGGTACCTCAGGAGAAAGCC  
CCGGCTAACTACGTG

>5960 len=135 tot-seq=1

TGGGGAATATTGGACAATGGGCGAAAGCCTGATCCAGCGACGCCGCGTGAGTGAAGAAGT  
ATCTCCGGTATGTAAACTTCTATCAGCAGGGAAGATAATGACGGTACCTGACCAAGAAGCC  
CCGGCTAACTACGTG

>5961 len=135 tot-seq=1

TGAGGAATATTGGTCAATGGACGAGAGTCTGATCCAGCGACGCCGCGTGAGTGAAGAAGT  
ATTCGGTATGTAAAGCTCTATCAGCAGGGAAGAAAATGACGGTACCTGACTAAGAAGCC  
CCGGCTAACTACGTG

>5962 len=135 tot-seq=1

TGGGGAATATTGGGCAATGGGCGAAAGCCTGACCCAGCAACGCCGCGTGCGGGATGAAGG  
CCTTCGGGTTGTAAACCGCTTTCAGCAGGGAAGACATCGACGGTACCTGCAGAAGAAGCC  
CCGGCTAACTACGTG

>5963 len=135 tot-seq=1

TGAGGAATATTGGACAATGGGCGCAAGCCTGATCCAGCAATACCGCGTGAGTGAAGAAGG  
CCTTAGGGTTGTAAAGCTCTTTCAGCAGGAAAAATAATGATGGTACCTGCAGAAGAAGTT  
CCGGCTAACTCCGTG

>5964 len=135 tot-seq=1

TGGGGAATATTGCACAATGGGCGCAAGCCTGATGCAGCAACGCCGCGTGAACGATGAAGG  
TCTTCGGATCGTAAAGTTCTGTTGCAGGGGAAGATAATGACGGTACCTACAGAAGAAGCG  
ACGGCTAAATACGTG

>5965 len=135 tot-seq=1

TGGGGAATATTGGACAATGGGGGAAACCCTGATCCAGCAATGCCGCGTGAATGAAGAAGG  
CCTTAGGGTTGTAAAATTCTTTTGTTCGTGAAGATAATGACGGTAGCGGACGAATAAGCC  
CTGGCTAACTCTGTG

>5966 len=135 tot-seq=1

TGGGAAATATTGGACAATGGGCGCAAGCCTGATCCAGCCATGCCGCGTGAGTGATGAAGG  
TCTTAGGGTTGTAAAGCTTTTTACCGATGAAGATAATGACGGTAGTCGGAGAAGAAGCC  
CCGGCTAACTTCGTG

>5967 len=135 tot-seq=1

TGGGGAATATTGCACAATGGGCGAAAGCCTGATGCAGCAACGCCGCGTGAGTGAAGAAGT  
ATCTCGGTATGTAAAGCTCTATCAGCAGGGAAGAAAATGACGGTACCTTTCGAATAAGCG  
CCGGCTAACTACGTG

>5968 len=135 tot-seq=1

CTTCACTCCCATAGCTTGGCGGGAGGGAGTGGCAGCCAGTGGCATCTTCTCTCCATTGT

TCAGCAAGCAAGAGGGAGGGTTACATCTTTTTACTCCAGCTGCCTGCAGCTCGGTGAGC  
TGGAGGGAGTGGCAC

>5969 len=135 tot-seq=1

GCTACCAATGCCATCGGCTTTCGGCAGCGGATCACTTCCACGTCTTCAGTCCAGAAAGA  
GGTCGGCAGCGGTTTCGACGTTGTGCCAGTAATCAACCGGCAGATAGAACCACAGTTTCGG  
CTTGTTACGCCATC

>5970 len=135 tot-seq=1

TGGGGAATATTGGACAATGGGCGAAAGCCTGATCCAGCAATGCCGCGTGAATGACGAAGG  
CCTTAGGGTTGTAAAGTTCTTTTAGCAGGAAAGATAATGACGGTACCTGCAAAAAAGCC  
CCGGCTAACTCCGTG

>5971 len=135 tot-seq=1

GGCAGAACAGAGGGTACCAGTTTCCCAGGCCATGGTGTAAAGGCCAAATTGTATCAGCCTC  
AGTCTGACGCTTTTGAAGACCTTCGCTCCACCTTCCCAAGGCTAAAAATTGTCTGCCT  
TTTGCAGGTGGTCAG

>5972 len=135 tot-seq=1

TGGGGAATATTGCACAATGGGGGAAACCCTGATGCAGCGACGCCGCGTGAGTGAGGAAGT  
ATTCGGTATGTAAAGCTCTATCAGCAGGGAAGAAAATGACGGTAATCAACCAGAAAGTC  
ACGGCTAACTACGTG

>5973 len=135 tot-seq=1

TGGGGGATATTGCACAATGGGGGAAACCCTGATGCAGCAACGCCGCGTGAGGGAAGAAGT  
TTTTCGGAATGTAAACCTCTATTCTTAGGGAAGATAATGACGGTAGCTAAGGAGAAAGCC  
CCGGCTAACTACGTG

>5974 len=135 tot-seq=1

TGGGGAATATTGCACAATGGGGGAAACCCTGATGCAGCAACGCCGCGTGAGTGAAGAAGT  
ATTCGGTATGTAAAGCTCTGTCTTCAGGGACGATAATGACGGTACCTGAGGAGGAAGCC  
ACGGCTAACTACGTG

>5975 len=135 tot-seq=1

TGGGGAATATTGGACAATGGAGGCAACTCTGATCCAGCAATTCTGTGTGTGTGAAGAAGG  
TTTTAGGACTGTAAACACTTTTAGTAGGGAAGATAATGACGGTACCTGACTAAGAAGCC

CCGGCTAACTACGTG

>5976 len=135 tot-seq=1

TGAGGAATATTGGTCAATGGGCGAAAGCCTGATGCAGCGACGCCCGTGCGGGATGAAGG

CTTTCGAGTCGTAAAGCTCTGTCCTATGGGAAGATAATGACGGTACCATAGAAGAAAGCC

CCGGCTAATTACGTG

>5977 len=135 tot-seq=1

TGAGGAATATTGGTCAATGAGCGAAAGCCGGATGCAGCAACGCCCGTGAGTGATGAAGG

CCTTCGGGTCGTAAACTCTGTCCTCAAGGAAGATAATGACGGTACTTGAGGAGGAAGCC

CCGGCTAACTACGTG

>5978 len=135 tot-seq=1

TGGGGAATATTGCACAATGGGGGAAACCCTGATGCAGCGACGCCCGTGAGCGATGAAGG

CTTTCGAGTCGTAAAGTTCTGTTGCAGGGGAAGATAATGACGGTACCCTGTGAGGAAGCC

CCGGCTAACTACGTG

>5979 len=135 tot-seq=1

TGGGGAATATTGCACAATGGGGGAAACCCTGATGCAGCGACGCCCGTGAGCGAAGAAGG

CCTTCGGGTCGTAAAGCTCTTTTATATGGGAAGATAATGACGGTACCATACGAATAAGCA

TCGGCTAACTCCGTG

>5980 len=135 tot-seq=1

TGGGGAATATTGCACAATGGGCGCAAGCCTGATGCAGCAACGCCCGTGAGCGATGAAGG

TTTTCGAATCGTAAAGCTCTGTCCTATGGGAAGATAATGACGGTACCATAGGAGGAAGCC

CCGGCTAACTACGTG

>5981 len=135 tot-seq=1

TGGGGAATATTGCACAATGGAGGAAACTCTGATGCAGCGACGCCCGTGAACGATGAAGG

CTTTCGAGTCGTAAAGTTCTGTCCTTGGGGAAGATAATGACGGTACCCAAGGAGGAAGCC

CCGGCTAACTACGTG

>5982 len=135 tot-seq=1

TGGGGAATATTGCACAATGGGCGAAAGCCTGATGCAGCGACGCCCGTGAGCGAAGAAGT

ATTCGGTATGTAAAGCTCTGTCCTATGAGAAGATAATGACGGTATCATAGGAGGAAGCC

CTGGCTAAATACGTG



>5983 len=135 tot-seq=1

TGGGGAATCTCCGCAATGGACGAAAGTCTGACGCAGCAACGCCGCGTGCGGGATGAAGG  
CCTTCGGGTTGTAAACCGCTTTCAGCAGGGAAGACATCGACGGTACCTGCAGAAGAAGCC  
CCGGCTAACTACGTG

>5984 len=135 tot-seq=1

TGGGGAATATTGCACAATGGAGGAAACTCTGATGCAGCGATGCCGCGTGAGGGAAGAAGG  
TTTTCGGATTGTAAACCTCTGTGTACAGGGACGATAATGACGGTACCTGTTCAGAAAGCT  
CCGGCTAACTACGTG

>5985 len=135 tot-seq=1

TGGGGAATATTGCACAATGGGCGAAAGCCTGACGCAGCGACGCCGCGTGAGCGAAGAAGT  
ATTCGGCATGTAAAGCTCTATCAGGAGGGAAGAAGATGACGGTACCTACCAAGAAGCT  
CCGGCTAAATACGTG

>5986 len=135 tot-seq=1

TGGGGAATATTGCACAATGGGCGAAAGCCTGATGCAGCGACGCCGCGTGAGCGAAGAAGT  
ATTCGGTATGTAAAGCTCTATCAGAAGGGAGGACATCGACGGTACCTGCAGAAGAAGCC  
CCGGCTAACTACGTG

>5987 len=135 tot-seq=1

TGGGGAATATTGCACAATGGGGGAAAACCTGATGCAGCGACGCCGCGTGAGCGATGAAGT  
ATTCGGTATGTAAAGCTCTATCAGCAAGGAAGATAATGACGGTACTTGACTAAGAAGCC  
CCGGCTAACTACGTG

>5988 len=135 tot-seq=1

TGGGGAATATTGCACAATGGGCGCAAGCCTGATGCAGCAACGCCGCGTGAACGATGAAGG  
TCTTCGGATCGTAAAGTTCTGTTGCAGGGGAAGATAATGAGTGTACCTTTCGAATAAGCG  
CCGGCTAACTACGTG

>5989 len=135 tot-seq=1

TGGGGAATATTGCGCAATGGGGGAAACCCTGACGCAGCGACGCCGCGTGCGGGATGACGG  
TTTTCGGATTGTAAACCTCTGTCCTCTGTGAAGATAGTGACGGTAGCAGAGGAGGAAGCT  
CCGGCTAACTACGTG

>5990 len=135 tot-seq=1

GCGCTAGCCTGAACCAGCCAAGTAGCGTGAAGGAGGAAGGCTCTATGGGTCGCAAACCTC  
TTTTATAGAAGAATAAAGTGCAGTATGTATACTGGGTTGTATGTATTATATGAATAAGGA  
TCGGCTAACTCCGTG

>5991 len=135 tot-seq=1

TGGGGAATATTGCACAATGGGGGAAACCCTGATGCAGCGACGCCGCGTGAAGGAAGAAGT  
ATCTCGGTATGTAACTTCTATAAGCAGGGAAAGATAATGGCGGTACCTGACGAAGAAGCC  
CCGGCTAACTACGTG

>5992 len=135 tot-seq=1

TGGGGAATATTGCACAATGGAGGAACTCGGATGCAGCGATGCCGCGTGGAGGAAGAAGG  
TTTTCGGATGGTAACTCCTTTTATCAGGGACGATAATGACGGTACCTGAAGAAAAAGCT  
CCGGCTAACTACGTG

>5993 len=135 tot-seq=1

TAGGGAATATTGCACAATGGAGGAACTCTGATGCAGCGATGCCGCGTGAGGGAAGAAGG  
TTTTCGGATTGTAAACCTCTGTCTTTGGGGACGGTAATGACGGTACCCAAGGAGGAAGCT  
CCGGCTAACTACGTG

>5994 len=135 tot-seq=1

TGGGGAATATTGCGCAATGGGGGAAACCCTGACGCAGCGACGCCGCGTGAGTGAAGAAGG  
CCTTCGGGTTGTAAAGCTCTGTCTTCAGGGACGATAATGACGGTACCTGAGGAGGAAGCC  
ACGGCTAACTACGTG

>5995 len=135 tot-seq=1

TGGGGAATATTGCACAATGGGGGAAACCCTGATGCAGCGACGCCGCGTGCCTGAAGAAGT  
AATTCGTTACGTAAAGCTCTACCAGCAGGGAAGAGAGTGACGGTACCTGAGTAAGAAGCC  
CCGGCTAACTACGTG

>5996 len=135 tot-seq=1

CGACGAATATTCCGCAATGCGCGAAAGCGTGACGGAGCGATGCCGCGTGCAGGATGAAGC  
GGCTCTGCCGTGTAACTGCTGTCAGGGAACAGAACATACGATCATTCCCAAAGGAAGGG  
CCTGCTAATCTCGTG

>5997 len=135 tot-seq=1

TAGGGAATCTTGCGCAATGGGCGAAAGCCTGACGCAACCATGCCGCGTGAATGATGAAGG

TCTTAGGATTGTAAAATTCTTTCAGCGGGGACGATAATGACGGTACCTGCAGAAGAAGCC  
CCGGCTAACTTCGTG

>5998 len=135 tot-seq=1

TGGGGAATATTGCACAATGGGGGAAACCCTGATGCAGCAACGCCGCGTGAGTGATGAAGT  
ACCTCGGTATGTAAAACCTCTATCAGCAGGGAAGAAAATGACGGTACCTGACTAAGAAGCC  
CCGGCTAACTACGTG

>5999 len=135 tot-seq=1

TGGGGAATGTTGGGCAATGGGCGAAAGCCTGACCCAGCAACGCCGCGTGAGGGAGGAAGG  
GTTTCGGCTCGTAAACCTCTGTCCTATGGGACGAAGAAGTGACGGTACCATAGGAGGAAG  
CCCCGGCTAACTACG

>6000 len=135 tot-seq=1

TGGGGAATATTGGACAATGGGCGCAAGCCGGATCCAGCCATGCCGCGTGAGTGACGAAGG  
TCTTCGGATTGTAAAGCTCTTTTGGCGGGGACGATAATGACGGTACCCGCAGAATAAGCC  
CCGGCTAACTTCGTG

>6001 len=135 tot-seq=1

GCGCGCAAATTACCCAATCCCGACACGGGGAGGTAGTGACAATAAATAACAATACCGGGC  
TTTTCAAGTCTGGTAATTGGAATGAGTACAATCTAAATCCCTTAACGAGGATCAATTGG  
AGGGCAAGTCTGGTG

>6002 len=135 tot-seq=1

CTGAGAATCTCCACAATGGACGAAAGTCTGATGGAGCGACATCGCGTGAGGGATGAAGG  
CCTTCGGGTTGTAAACCTCGGAAATTATCGAAGAATGAGTGACAGTAGATAATGTAAGCC  
TCGGCTAACTACGTG

>6003 len=135 tot-seq=1

TGGGGGATATTGCACAATGGGGGAAACCCTGATGCAGCGACGCCGCGTGAGGGAAGAAGG  
TTTTCGGATTGTAAACCTCTGTCAGTGGGGACGATAATGACGGTACCCACGGAGGAAGCC  
ACGGCTAACTACGTG

>6004 len=135 tot-seq=1

TGGGGGATATTGCACAATGGGGGAAACCCTGATGCAGCAACGCCGCGTGAAGGAAGAAGG  
TCTTCGGATTGTAAACTTTTGTCTTAGTGAAGATAATGACGGTAGCTAAGGGGGAAGCT

CCGGCTAACTACGTG

>6005 len=135 tot-seq=1

CCCTGACCGAGCAACGCCGCGTGAGTGAAGAAGGTTGTCGGATCGTAAAGCTCTGTTGTA  
AGAGAAGAACGTGTGTGAGAGTGGAAAGTTCACTCAGTGACGGTAACGTGCCAGAAAGGG  
ACGGCTAGCTACGTG

>6006 len=135 tot-seq=1

TGGGGAATATTGCACAATGGAGGAACTCTGATGCAGCGACGCCGCGTGAGTGAAGAAGT  
ATTCGGTATGTAAAGCTCTATCAGCAGGGAAGAAAATGACGGTAACTTACCAGAAAGGG  
ACGGCTAACTACGTG

>6007 len=135 tot-seq=1

TGGGGAATATTGCACAATGGGGGAAACCCTGATGCAGCGACGCCGCGTGAGCGAAGAAGG  
CCTTCGGGTCGTAAAGCTCTTTTATATGGGAAGATAATGACGGTATCATAGGAGGAAGCC  
CTGGCTAAATACGTG

>6008 len=135 tot-seq=1

TGGGGAATATTGCACAATGGACGGAAGTTTGATGCAGCGACGCCGCGTGGGCGAAGAAGG  
CTTTCGAGTCGTAAAGCTCTGTCCTATGAGAAGATAATGACGGTATCATAGGAGGAAGCC  
CTGGCTAAATACGTG

>6009 len=136 tot-seq=1

TGGGGAATATTGCACAATGGGGGAAACCCTGATGCAGCGACGCCGCGTGAGTGAAGAAGT  
ATTCGGTACGTAAAGCTCTGTTAGCAGGGAAGAGGAAGGACGGTACCTGCAGAGGAAGC  
CACGGCCAACACTACGTG

>6010 len=136 tot-seq=1

AATCTAATAAGAAACAGACAGTACACAATGAAGTCATCAAGATCTGGTGTCTGGTGCAAG  
TAAGACTCGCCCCACAGGAGCTGGGGTCGTGGAAACAGAAGTGAAGAAATTGAGACATGG  
AAACACAGGATAACAC

>6011 len=136 tot-seq=1

AAGCCTGAACGAGCGATGCCGCGGGAGGGAAGAAGGCCTGCGGGTCGTAAAGCGCTGTTG  
CGGGGGAAAAAAGGCAGCATCAGGAAATGGGTGCTGACGGATGGTGCCCCGCCAGAAAGT  
CACGGCTAACTACGTG

>6012 len=136 tot-seq=1

TGGGGAATATTGCACAATGGGGGAAACCCTGATGCAGCAACGCCGCGTGAGTGAAGAAGT  
ATTTCCGGTATGTAAAGCTCCATCAGCAGGGAAGAAAAAGACGGTACCTGACGAATAAGC  
CACGGCTAACTACGTG

>6013 len=136 tot-seq=1

TATGTATATGAACAAAGTAAATTGCAATAGCAGAAATAATTGACAAAATGTTGCTTGGTG  
ATTTGCTGATATTCATAGACCATGAAAGCTTCCAATTTAATTATATATATGTTAGTAAAT  
TAAGAAATATATCAAA

>6014 len=136 tot-seq=1

TGGGGAATTTTGGACAATGGGCGCAAGCCTGATCCAGCGACGCCGCGTGTGGGAAGACGG  
TCCTCTGGATTGTAAACCACTGTCCCCAGGGACGAAAATGACGGTACCTGGGGAGGAAGC  
TCCGGCTAACTACGTG

>6015 len=136 tot-seq=1

GCGCGCAAATTACCCATTCCCGGCACGGGGAGGTAGTGACGAAAAATAACGATACGGGAC  
TCATCCGAGGCCCGTAATCGGAATGAGCACACTTTAAATCCTTTAACGAGTATCCATTG  
GAGGGCAAGTCTGGTG

>6016 len=136 tot-seq=1

TGGGGAATATTGCACAATGGGGGAAACCCTGATGCAGCGACGCCGCGTGAAGGATGAAGG  
TTTTCCGGATTGTAACTTCTTTTATTAAGGACGAAACTTGACGGTACTTAATGAATAAGC  
TCCGGCTAACTACGTG

>6017 len=136 tot-seq=1

TGGGGAACATTGCACAATGGGGGAAACCCTGATGCAGCGACGCCGCGTGAGTGAAGAAGT  
ATTTCCGGTATGTAAAGCTCTATCAGCAGGGAAGAAGAAGGACGGTACCTGAGTAAGAAGC  
CCCCGCTAACTACGTG

>6018 len=136 tot-seq=1

CCTTAAGATAGTGACCTCTGCAGTTTGGTACTTTAAGGCAGTCAGTTTGTGAGCTTGCTA  
GCTTTAGAGAATCCAGCCTAAATCCTTTTACCTGCAGACAGTCTGCCTAGCAGCTTGCTA  
GCATAAGAGAGACAGA

>6019 len=136 tot-seq=1

TAGGGAATATTGGACAATGGGCGAAAGCCTGATCCAGCAATACCGCGTGAGTGATGAAGG  
CTCTTTGGTTGTAAAGCTCTTTCGTTGAGGAAGATTATGACGGTACTCAAAGAAGAAGT  
CCCGGCTAACTCCGTG

>6020 len=136 tot-seq=1

AAGTCTGATGGAGCAACGCCGCGTGAGGGAAGAAGGGTTGCGGCTCGTAAAGCTCTGTTG  
TTGGTGAAGAAGGACAGGGGGAGTAACTGACCTTGGTTTGACGGTAATCAAGTAGAAAAGT  
CACGGCTAACTACGTA

>6021 len=136 tot-seq=1

TGAGGAATAGGGGTCAATGGGAGAGAGCCTGAACCAGACAAGTAGCGAGCAGGATGACGG  
CCCTATGGGATGTAAACTGCTTTTATATGGGAATAAAGTGAGGGACGTGTCCCTTATTGC  
ATGTACCATACGAATA

>6022 len=136 tot-seq=1

TCGAGAATTTTGGGCAATGGGCGAAAGCCTGACCCAGCAATGCCGCGTGCGGGATGAAGG  
TCTTCGGATTGTAAACCGCTGTCGAGGGGGACGAAATTTGACGGTACCCCTAGAGGAAGC  
CACGGCTAACTACGTG

>6023 len=136 tot-seq=1

TGGGGAATATTGGGCAATGGGCGAAAGCCTGACCCAGCGACGCCGCGTGAGGGAAGAAGG  
TCTTCGGATTGTAAACCTTAAACAACAGGGACGAAGAAGTGACGGTACCTGTTAGGAAGC  
CACGGCTAACTACGTG

>6024 len=136 tot-seq=1

GCGCGCAAATTACCCACTCCCGGCACGGGGAGGTAGTGACGAAAATAACGATACGGAAC  
TCACATGAGGCTCCGTAATCGGAATGAGTACACTTTAAATCCTTTAACGAGGATCTATTG  
GAGGGCAAGTCTGGTG

>6025 len=136 tot-seq=1

TGGGGAATATTGCTCAATGGGGGAAACCCTGAAGCAGCAACGCCGCGTGAAGGATGAAGG  
CCTTCGGGTTGTAAACTTCTTTAATCAGGGACGAATTAATGACGGTACCTGAAGAATAAG  
CCACGGCTAACTACGT

>6026 len=136 tot-seq=1

TGGGGAATATTGGGCAATGGGGGCAACCCTGACCCAGCAACGCCGCGTGAAGGAAGAAGG

CTTTCGGGTTGTAACTTCTTTGACGAGGGACGAAACATGACGGTACCTCGAAAACAAGC  
CACGGCTAACTACGTG

>6027 len=136 tot-seq=1

CACAGAGAGACACAGACAAACAGGAAGACAGTATCCCCTCGTGGTTAACATCACAGCTTC  
TGTTTATTAAGCACCTAATGTGTTACAACACTGCACAGATCCCATTGAACCATGGGCCCTCT  
CCCTCACCTCCCAAG

>6028 len=136 tot-seq=1

TGGGGAATATTGCGCAATGGGGGAAACCCTGACGCAGCAACGCCGCGTGGGGGATGAAGG  
CCCTCGGGTTGTAAACCCCTTTCAGTAGGGACGAAATCAGACGGTACCTACAGAAGAAGC  
CCCGGCAACTACGTG

>6029 len=136 tot-seq=1

TGGGGAATCTTGCGCAATGGGCGAAAGCCTGACGCAGCAACGCCGCGTGCGGGATGAAGG  
CCTTCGGGTTGTAAACCGCTTTCAGTGGGGACGAAACAAGACGGTACCCACAGAAGAAGC  
CCCGGCAACTACGTG

>6030 len=136 tot-seq=1

GGGAGCAGAGGTCTCCGCCCTGGTTCCACACAGGGCGCCTCTGCAGAATTGCACAGAAAT  
CTCCAGAAATTCTGGCCTCTGCTTATCTGGATGGAGTCTAGGATGGGATGTCCTGACAG  
TCCTCAGTGATTCAA

>6031 len=136 tot-seq=1

TAGGGAATCTTCCGCAATGGACGCAAGTCTGACGCAGCGACGCCGCGTGCGGGACGGAGG  
CCTTCGGGTCGTAAACCGCTTTCAGCAGGGAAGAGAGAAGACTGTACCTGCAGAAGAAGC  
CCCGGCTAACTACGTG

>6032 len=136 tot-seq=1

TAGGGAATCTTCCACAATGGACGCAAGTCTGATGGAGCAACGCCGCGTGGAGGATGACAC  
TTTTCGGAGCGTAACTCCTTTTATCAGGAAAGAATAATGACGGTACCTGATGAATAAGC  
ACCGGCTAACTCCGTG

>6033 len=136 tot-seq=1

TGAGGAATCTTGACAATGGGCGAAAGCCTGATGCAGCGACGCCGCGTGAGGGATGAAGG  
CCTTCGGGTTGTAAACCTCTGTCAGTAGGGAAGAAGATTGACGGTACCTACTGAGGAAGC

TTCGGCTAACTACGTG

>6034 len=136 tot-seq=1

TGGGGAATATTGCACAATGGGGGAAACCCTGATGCAGCGACGCCGCGTGGAGGAAGAAGG  
TCTTCGGATTAGAAACCCAGTAGTCCATGTAGATCGGAAGAGCGTCGTGTAGGGAAAGA  
GTGAGCCAATGTGTAG

>6035 len=136 tot-seq=1

AAGTCTGATGGAGCCACGCCGCGTGAGTGAAGAAGGGTTTCGGCTCGTAAACTCTGTTG  
TTGGTGAAGAAGTACAGGGGTAGTAACTGGCCTTTATTTGACGGTAATCAATTAGAAAGT  
CACGGCTAACTACGTG

>6036 len=136 tot-seq=1

TGGGGAATCTTGACAATGGGCGCAAGCCTGATCCAGCCATGCCGCGTGGATGACTGAAG  
GCCCTAGGGTTGTAAAGTCCTTTCGACGGGGACGATAATGACGGTACCCGTAGAAGAAGC  
CCCGGCTAACTTCGTG

>6037 len=136 tot-seq=1

TGGGGAATATTGGGCAATGGGCGCAAGCCTGACCCAGCAACGCCGCGTGAGGGAAGAAGG  
TCTTCGGATTGTAAACCTTTTTGACAGGGGACGAAGCATGACGGTACCCTGAAAACAAGC  
CACGGCTAACTACGTG

>6038 len=136 tot-seq=1

AAGCCTGACGGAGCAACGCCGCGTGAGTGAAGAAGGATTTAGTTAGTAAAAATATGTTG  
TTAGGGAAGAAAAATGTATAGTAAATATATAAAAAAGAGAAGGTACCTAACCAGAAAGC  
CACGGCTAACTACGTG

>6039 len=136 tot-seq=1

TGGGGAATATTGCACAATGGGCGAAATCTGATAGAGCTTTACATACCGAAATACTTCTTC  
GCTCACGCGGCGTCTGCTGCATCAGGCTTTGGAAGAAAATGACGGTACCTTACTAAGAAGC  
TCCGGCTAAATACGTG

>6040 len=136 tot-seq=1

AAGTCTGATGGAGCAACGCCGCGTGAGGGAAGAAGGGTTTCGGCTCGTAAAGCTCTGTTG  
TTGGTGAAGAAGGACAAGGGTAGTAACTGGCCTTGTTTACGGTAATCAAATAGAAAGT  
CACGGCTAACTACGTG



>6041 len=136 tot-seq=1

TGGGGAATATTGCACAATGGGGGAACTCTGACGCAGTGACGCCGCGTATAGGAAGAAGG  
TCTTCGGATTGTAACTATTGTCGTTAGGGAAGAAAAAGGACAGTACCTAAGGAGGAAGC  
TCCGGCTAACTACGTG

>6042 len=136 tot-seq=1

TGAGGAATATTGCGCAATGGAGGAGACTCTGACGCAGTGACGCCGCGTATAGGAAGAAGG  
TCTTCGGATTGTAACTATTGTCGTTAGGGAAGAAAAAGGACAGTACCTAAGGAGGAAGC  
TCCGGCTAACTACGTG

>6043 len=136 tot-seq=1

TGGGGGATATTGCACAATGGGGGAAACCCTGATGCAGCGATGCCGCGTGAAGGAAGAAGA  
TTTTCGGATCGTAACTTCTATCAGCAAGGAAGAAGAAGGACAGTACTTGACTAAGCAGC  
CCCGGCTAACTACGTG

>6044 len=136 tot-seq=1

TGGGGAATATTGGGCAATGGGCGAAAGCCTGACCTAGCAACGCCGCGTGAAGGATGAAGG  
TTTTCGGATTGTAACTTCTGTCGAGGGGACGAAGAATGACGGTACCCTGTAAGAAAGC  
CCCGGCTAACTACGTG

>6045 len=136 tot-seq=1

TGGGGAATATTGCACAATGGGGGAAGCCCTGATGCAGCGACGCCGCGTGAGCGATGAAGT  
ATTCGGTATGTAAAGCTCTGTCAGCAGGGAAGAAGAATGACGGTACCTGACCAAGAAGC  
CCCGGCTAACTACGTG

>6046 len=136 tot-seq=1

TGGGGAATATTGCACAATGAGGGGAACCCTGATGCAGCGACGCCGCGTGAGTGAAGAAGT  
ATTCGGTATGTAAAGCTCTATCAGCAGGGAAGAATTTAGACGGTACCTGACTAAGAAGC  
CCCGGCTAACTACGTG

>6047 len=136 tot-seq=1

TGGGGAATATTGCACAATGGGGGAAACCCTGATGCAGCAACGCCGCGTGAGTGAAGAAGT  
CATTCGTGATGTAAAGCTCTATCAGCAGGGGAAGAAAATGACGGTACCTTACTAAGAAGC  
TCCGGCTAAATACGTG

>6048 len=136 tot-seq=1

TAGGGAATATTGCGCAATGGGGGAAACCCTGACGCAGCAACGCCGCGTGAGTGAAGACGT  
ATCTCGGTATGTAAAGCTTTATCAGCGGGGAAGAAGGAAGACGGTACCCGACTAAGAAGC  
CCCGGCTAACTACGTG

>6049 len=136 tot-seq=1

TGGGGGATATTGCACAATGGGGGAAACCCTGATGCAGCAACGCCGCGTGAGGGAAGAAGG  
TCTTCGGATTGTAAACCTTTGTTTTTGGTGACGAATAATGACGGTAGCCAAAGAGGAAGC  
TCCGGCTAACTACGTG

>6050 len=136 tot-seq=1

TGAGGAATATTGGTCAATGGGCGGGAGCCTGAACCAGCCAAGTAGCGTGCAGGAAGACGG  
CCCTATGGGTTGTAAACTGCTTTTATGCGGGGATAAAATGACGGTACCTTACTAAGAAGC  
TCCGGCTAAATACGTG

>6051 len=136 tot-seq=1

TGGGGGATATTGCGCAATGGGGGCAACCCTGACGCAGCAACGCCGCGTGAAGGATGAAGG  
TTTTCGGATTGTAAACTTCTTTTCTTGAGGACGAAAATTGACGGTACTCAAGGAATAAGC  
TCCGGCTAACTACGTG

>6052 len=136 tot-seq=1

TGGGGAATTTCCGCAATGGGGGCAACCCTGACGGAGCAATACCGCGTGAGGGAGGACGG  
CTTTTGGGTTGTAAACCTCTTTTATCAGGGAAGAATTTTACGGTACCTGATGAATCAGC  
ATCGGCTAACTCCGTG

>6053 len=136 tot-seq=1

TGGGGGATATTGCACAATGGGGGGAACCCTGATGCAGCAACGCCGCGTGAGTGAAGAAGT  
ATTTTCGGTATGTAAAGCTCTATCAGCAGGGAAGAAAAAAGACGGTACCTGACTAAGAAGT  
CCCGGCTAACTACGTG

>6054 len=136 tot-seq=1

AAGTCTGATGGAGCAACGCCGCGTGAGTGAAGAAGTGTTTCGGCTCGTAAAGCTCTGTTG  
TTGGTTAAGAAGGACATGGGTAGTAACTGACCTTTATTTGACGGTAATCACTTAGAAAGT  
CACGGCTAACTACGTG

>6055 len=136 tot-seq=1

CAGCAGGGGATCATGGGAAATGCCAAGTAAGCCAGCAACATGGTATCATGGGAAATGCCA

AGTAAGCCAGCAACATGGGATCATGGGAAATGCTAAGTAAACCAGCAACATGGGATCATA  
GGGAATGCCAAGTAAA

>6056 len=136 tot-seq=1

ATGGACGCAAGTCTGATGGAGCAACGCCGCGTGAGTGAAGAAGGGTTTCGGCTCGTAAAG  
CTCTGTTGTTGGTGAAGAAGGACAGGGGTACCTTTGTTTGACGGTAATCAATTAGAAAAGT  
CACGGCTAACTACGTG

>6057 len=136 tot-seq=1

AAGGCGGAGGGAGCAACGCCGCGGGAGGGAAGAAGGGGGCGGAGCGGAAAGCGCGGGGG  
GGGGGAAGAAGGAGAGAGGGAGTAAGTGGCCTTTATTTGACGGTAATCAACCAGAAAAGT  
CACGGCTAACTACGTG

>6058 len=136 tot-seq=1

TGGGAATATTGCACAATGGGCGAAAGCCTGATGCAGCAACGCCGCGTGAGCGATGAAGG  
CCTTCGGGTTGTAAAGCTCTGTCTTCGCTGACGAAACCTGACGGTAAGCGAGGAGGAAGC  
CACGGCTAACTACGTG

>6059 len=136 tot-seq=1

CCACTGGGAAGCCACCTGTGCTTTCCCCATCTGGGTGGGGCGGCAGCAGAGACCCTGA  
GAATCAGCGGTTATGGGAGCTGTGTGTTAGCTGTGTGTTATTGGCTTTGGCTTCAGCATG  
TCCTGCCTAGGAGTCT

>6060 len=136 tot-seq=1

TGGGAATATTGTACAATGGGGGAAACCCTGATGCAGCAACGCCGCGTGAAGGATGAAGG  
TTTTCGGATTGTAGACTTCTTTATTAAGGACGAAAATGACGGTACTTAATGAATAAGC  
TCTGGCTAACTACGTG

>6061 len=136 tot-seq=1

TAGGAATATTGCACAATGGGCGAAAGCCTGATGCAGCAACGCCGCGTGTGCGATGAAGG  
CCTTCGGGTCGTAAAGCACTTTTCTGGGAGATGAGAAAGGACAGTATCCCAGGAATAAGT  
CTCGGCTAACTACGTG

>6062 len=136 tot-seq=1

TGGGAATATTGGACAATGGAGGGAAGTCTGATCCAGCAATTCTGTGTGTGTGAAGAAGG  
TTTTAGGACTGTAAAACACTTTTAGTAGGGGAAGATAATGACGGTACCCTGTGAGGAAGC

CCCGGCTAACTACGTG

>6063 len=136 tot-seq=1

AAGCCGGAGGAAGCCAGGCCGCGGGGAGGAAGAAGGCCGCGGGGGGAAAGGACGGGCG  
GCGGGGAGGAAGGGAGGAAAGGGAAGACCTTTACTCATTGACGTTACCCGCAGAAGAAGC  
ACCGGCTAACTCCGTG

>6064 len=136 tot-seq=1

CGGTGACTAGGCCGAATTCTCCTGGTTGATAAATGAGAGGAGCTGAGAAGCGCTGAGAT  
GCCTGTTTGGAGCATCTGATCTGTAGAAGACGAATCTTCACTGTCCATGGAGATGTTCT  
GGGAGGGAGAGCCGGC

>6065 len=136 tot-seq=1

AAGAATGATGAAGAAATGAAGAGTGTATGAAGAAGGAATTAGGGTTGTAAAGTAATTTCA  
GAGGGGAGGAAGGGAGTAAAGTTAATACCTTTGCTCATTGACGTTACCCGCAGAAGAAGC  
ACCGGCTAACTCCGTG

>6066 len=136 tot-seq=1

TGGGGAATATTGCGCAATGGGGGCAACCCTGACGCAGCAACGCCGCGTGAAGGATGAAGG  
TCTTCGATTGTAAACTTCTGTTCTGAGGGGCGAACAAGGACGGTACCTCAGGAGGAAGC  
CACGGCTAACTACGTG

>6067 len=136 tot-seq=1

TGGGGGATATTGCGCAATGGGGGAAACCCTGACGCAGCAACGCCGCGTGGAGGATGACGG  
TTTTCGATTGTAAACTCCTTTTATGGGGGACGAATCAAGACGGTACCCCATGAATAAGC  
TCCGGCTAACTACGTG

>6068 len=136 tot-seq=1

GGAAGCTGGGACCAGCTGGGTGACAAACAGCCCATACTTAGGCTCCTCCCTGGAGCCCA  
GGGTGGCGTCCTAGGATGCTCCAGGCCTTGACTCTGGGATCCTTCCTTCTGATGCCAC  
ATCACAGAGAGGTGGC

>6069 len=136 tot-seq=1

TGGGGAATATTGCACAATGGACGGAAGTTTGTATGCAGCGACGCCGCGTGAGGGAAGAAGG  
TTTTAGGATTGTAAACCTCTGTCTTCAGGGACGAAAAAAGACGGTACCTGAGGAGGAAGC  
TCCGGCTAACTACGTG

>6070 len=136 tot-seq=1

TGGGGAATATTGCACAATGGGGGAAACCCTGATGCAGCAACGCCGCGTGAGTGAAGAAGC  
GTTTCGGCGCGTAAAGCTCTGTCAGCGGGGAAGAAAGAAGACGGTACCCGACCAAGAAGC  
CCCGGCTAACTACGTG

>6071 len=136 tot-seq=1

GAGGCCAGGCACCCCCGCCCCAGGAGTGGCTCTGTCCATCCGGCGTCTTTCACACATTC  
TTTCTTCTCTGTCTCTCCTCCTCCTCCACATCCTTCTGTAGAGCTACTTGGTAAG  
TCAAATGTCGGTCCCT

>6072 len=136 tot-seq=1

GGGGAATATTGGGCAATGGGGGAAACCCTGACCCAGCAACGCCGCGTGGAGGAAGAAGGG  
TTTCGGATCGTAAACTCCTGTCCTTGGAGACGAGTAGAAGACGGTATCCAAGGAGGAAGC  
CCCGGCTAACTACGTG

>6073 len=136 tot-seq=1

TGGGGAATATTGCGCAATGGGGGAAACCCTGATGCAGCGACGCCGCGGAAGGAAGAAGT  
ATTCGGTATGTAAACTTCTATCAGCAGGGAAGAAAAAAGACGGTACCTGACTAAGAAGT  
CCCGGCTAACTACGTG

>6074 len=136 tot-seq=1

AAGCCTGATGGAGCAACGCCGCGTGAGTGAAGAAGGTTTTCGGATCGTAAACTCTGTTG  
TTGAAGAAGAACGAGCGTGAGAGTAACTATCACTCAGTGACGGTATTCAACCAGAAAGT  
CACGGCTAACTACGTG

>6075 len=136 tot-seq=1

TTGAGGTCCAGGAGCTGCCGCCACCCGGCTCCTCCTCTGGGTCCCCCAGCAGCACGGGG  
ACCACACTGGAGAAGAGCTGTTTGCACCATTGCTCCGGCGGCGGCCACCTGCCTTCCGCC  
TAGGGAGACAGAGCCG

>6076 len=136 tot-seq=1

GCGGGAGCCTGAACCAGCCAAGTCGCGTGAGGGAAGACGGTCCTACGGATTGTAAACCTC  
CTTGCCGGGGAGCAACGGGGTCCTTGCAGGGCCCAATGAGAGTACCCGGAGAAAAAGC  
ATCGGCTAACTCCGTG

>6077 len=136 tot-seq=1

TGGGGAATATTGCACAATGGGGGAAACCCTGATGCAGCGACGCCGCGTGAAGGAAGAAGT  
ATCTCGGTATGTTAACTTCTATCAGCAGGGAGGAAAACAGACGGTACCTGACTAAGAAGC  
CCCGGCTAACTACGTG

>6078 len=136 tot-seq=1

AAGTCTGATGGAGCAACGCCGCGTGAGGGAAGAAGGGTTTCGGCTCGTAAAGCTCTGTTG  
GTAGTGAAGAAAGATAGAGGGAGGAACGGGCCTTTATTTGACGGTAATTAAGTAAAGT  
CACGGCTAACTACGTG

>6079 len=136 tot-seq=1

TAGGGAATCTTCGGCAATGGGGGCAACTCTGACGCAGTGACGCCGCGTGCAGGAAGAAGG  
TTTTCGGATTGTAACTGCTTTAGACAGGGAAGAAAAAAGACAGTACCTGTAGAATAAGC  
TCCGGCTAACTACGTG

>6080 len=136 tot-seq=1

TGGGGAATATTGCACAATGGGGGGAACCCTGATGCAGCGACGCCGCGTGGGTGAAGAAGT  
ATTTTCGGTATGTAAAGCCCTGTCAGCAGGGAAGAAGAATGACGGTACCTGACCAAGAAGC  
ACCGGCTAAATACGTG

>6081 len=136 tot-seq=1

CAGCTCTCACCTCTGCAAAACAGAGAACCCTGGCCAAGGGGGAGCAGGGTTGAAGATTAG  
GGTAGAGGGTGAATGGAGAAAGGATTTCTTTTGTGGCACAAAGAAGAAGGTAAATTGTT  
TCTTCATCTCATTGTC

>6082 len=137 tot-seq=1

GGGGCCGTGTGTGTGCCTACAATGACCCAGGTCTACACCCCTTCTAGCACGGAGTCAGCA  
CACATGCAACCATTCTGCTGGCTGGTACCCACGGAAGGAACACAGGTGGCTTAGAGGTA  
GATGCAGAGACCAGAGA

>6083 len=137 tot-seq=1

TGGGGAATATTGCGCAATGGGCGAAAGCCTGACGCAGCGACGCCGCGTGCGGGATGACGG  
CCTTCGGGTTGTAAACCGCTGTCGGGAGGGACGAAGCTCTGACGGTACCTCAAAGGAAG  
CACCGGCTAACTCTGTG

>6084 len=137 tot-seq=1

GAGCTGGTGTCTTGAGTGAGGGGCCCTCAGAGCCAGTAGTTAACTGGGCAGTGGAGGGAG

GCATGTGGTTAGGCCTCAGGCCAGGTCTCCAGGAGACCTGAGAGATAGTTTGAGAGAGGA  
GGACCATTCTGTGGAGC

>6085 len=137 tot-seq=1

TGGGGAATATTGCACAATGGGGGAAACCCTGATGCAGCGACGCCGCGTGAGCGAAGAAG  
TATTTCAAGTATGTAAAGCTCTACCAGCAGGGAAGAAGAATGACGGTACCTGACTAAGAAG  
CACCAGCTAAATACGTG

>6086 len=137 tot-seq=1

TAGGGAATTTTCGTCAATGGGGGAAACCCTGATGCAGCGACGCCGCGTGAGTGAGGAAGT  
ATTTCCGGTATGTAAAGCTCTATCAGCAGGGAAGAAGAATGACGGTACCTGACTAAGAAG  
CCCCGGCTAACTACGTG

>6087 len=137 tot-seq=1

CAAATATTCTGTGATCTTGTCTCTCTAACTATGCTAAACTACTGCTTACCCAC  
AGCCTCACCAGACTCCAGCAGAAACAGGCACCCAGGAAGCACTCTGGGTAAACTTCCA  
TTTACGGTGGCTGCACC

>6088 len=137 tot-seq=1

GGAAGAGGGAGAGGCACCAGCAGGAACTCAAACTGCAGCAGCAGCAGCAGCAGCAGCAA  
GAGGAGCAGAAGCACCAGAAGCAGCAACAGCAGAAGCAGCAGCAACAGCAGCAGAAGCAG  
GGACAGAATCACCAGCA

>6089 len=137 tot-seq=1

TAGGGAATCTCCACAATGGGCGAAAGCCTGATGGAGCAACGCCGCGTGGAGGTGGAAGG  
CCTACGGGTCGTCAACTTCTTTCTCGGAGAAGAAACAATGACGGTATCTGAGGAATAAG  
CATCGGCTAACTCTGTG

>6090 len=137 tot-seq=1

TAGACTTGATTAAGCCTATAAGCGAATTACATGAAGATGTTGCAAATCTGAATTATGCG  
ATTTAATGACATGGCAACGCAAAGCGTATACAAAGTGAAAAACAGCTTCGACGAGTGGC  
TAAAATCCAAAGGAAAA

>6091 len=137 tot-seq=1

CAAGTCTGATGGAGCAACGCCGCGTGAGTGAAGAAGGGTTTCGGCTCGTAAAGCTCTGTT  
GGTAGTGAAGAAAGATAGAGGTAGTAACTGTTACGTTTCGACGGTATCTAACCAGAAAG

CCACGGCTAACTACGTG

>6092 len=137 tot-seq=1

CAACCCTGATCCAGCCATGCCGCGTGCAGGATGAAGGTCTTCGGATTGTAACTGCTTTT  
GTCAGGGACGAAAAGGGACGTGATAACACCACGTTCTGCTGACGGTACCTGAAGAATAAG  
CACCGGCTAACTACGTG

>6093 len=137 tot-seq=1

CAAGTCTGATGGAGCAACGCCGCGTGAGTGGAGAAGGGTTTCGGCTCGTAAAGCTCTGTT  
GTTGGTGAAGAAGGACGGGGTAGTAACTGACCTTTGTTTGACGGTAATCAACCAGAAAAG  
TCACGGCCAACACTACGTG

>6094 len=137 tot-seq=1

CGGGGAATATTGCGCAATGGGCGAAAGCCTGACGGAGCAACGCCGCGTGCGGGATGACGC  
GTTTCGGCGTGTAACCGCTGTTTCGTGGGGACGAAGCACTGACGGTACCCACGGAGGAAG  
GCCCCGGCTAACTACGTG

>6095 len=137 tot-seq=1

TGGGGAATATTGGGCAATGGGCGCAAGCCTGACCCAGCAACGCCGCGTGAGGGAAGAAGG  
TTTTCGGATCGTAAACCTCTGTTGTAGGGGACGAGGAAAAGACGGTACCCTACGAGGAAG  
CTCCGGCTAACTACGTG

>6096 len=137 tot-seq=1

TGAGGAATATTGGTCAATGGGCGAGAGCCTGAACCAGCCAAGTAGCGTGCAGGATGACGG  
CCCTATGGGTTGTAACTGCTTTTATATGGGAATAATAATGACGGTACCAAAGGAATAAG  
CACCGGCTAACTCCGTG

>6097 len=137 tot-seq=1

TGGGGAATCTTGACAATGGGGGAAACCCTGACGCAGCGACGCCGCGTGAGGGAAGACGG  
TCCTCTGGATTGTAAACCTCTGTCTTCGGGGACGAAAGAAGACGGTACCCGAGGAGGAAG  
CCACGGCTAACTACGTG

>6098 len=137 tot-seq=1

TAGGGAATCTCCACAATGGACGAACTCTGATGCAGCCATGCCGCGTGTGTGAAGAAGG  
CCTTCGGGTTGTAAAGCACTTTCGGAGGGGAGGAAAGAATGACGTTACCCTCAGAAGAAG  
CACCGGCTAACTCCGTG



>6099 len=137 tot-seq=1

TGGGGAATATTGCGCAATGGGGGAAACCCTGACGCAGCGACGAAAAATAACAATACAGGA  
CTCTTCGAGGCCCTGTAATTGGAATGAGTCCACTTTAAATCCTTTAACGAGGATCCATT  
GGAGGGCAAGTCTGGTG

>6100 len=137 tot-seq=1

TGGGGAATATTGCACAATGGGCGCAAGCCTGATGCGGCCATGCCGCGTGTGTGAAGAAGG  
CCTTCGGGTTGTAAAGCACCTTCGGAGGGGAGGAAAAAATGACGTTACCCTCAGAAGAAG  
CACCGGCTAACTCCGTG

>6101 len=137 tot-seq=1

TAGGGAATATTCCACAATGGGCGCAAGCCTGATGGAGCAACACCGCGTGAGTGAAGAAGG  
GCTTCGGATTGTAAAGCTCTGTTGTTAGAGAAGAACGTTGGTAGGAGTGGAATCTACC  
AAGTGACGGTAACTAAC

>6102 len=137 tot-seq=1

TAGGGAATATTCCACAATGAGCGAAAGCCTGACCCAGCAACGCCGCGTGAAGGAAGAAGG  
CTTCGGGTTGTAAACTTCTTTAAGAGGGAAGAGCAGAAGACGGTACCTCTTGAATAAG  
CCACGGCTAACTACGTG

>6103 len=137 tot-seq=1

TGGGGAATATTGCACAATGGGCGCAAGCCTGATGCAGCAACGCCGCGTGAGGGATGACGG  
CCTTCGGGTTGTAAACCTCTTTAGTAGGGAAGAAGCCTTCGGGTGACGGTACCTGCAGA  
AAAAGCACCGGCTAACT

>6104 len=137 tot-seq=1

TGGGGAATATTGGGCAATGGAGGAACTCTTACCCAGCAATGCCGCGTGAGTGATGAAGG  
CCCTATGGGTTGTAAAGCTCTTTGATTAGGAACGAAACAATGACGGTACCTAAAGAACAA  
GCCCCGGCTAACTATGT

>6105 len=137 tot-seq=1

AAAGGGAGGTCAGAGAAATTGGAAGCTTGTAAAGGATTCAGCCTGCCATTGCTGGTTTTG  
ACAATGGAGGAAGGGGACCTCTAGAACCTGAGAGCAACCCCCAACCAATAGCCATCAAG  
GAAACAGGACCTAAGTC

>6106 len=137 tot-seq=1

CAGTATTCGCCTTAGACGCAGCAGAAGAATCCGCTTCAGCATTGTTAACCTCAACTCTCA  
AAGCAGTCTTATCAACCGAAGCACTCTGAGAATCAGTAGTCTCAAACCAGCAGCAGAAC  
CAGAACCAACACCCAGAA

>6107 len=137 tot-seq=1

TGGGGGATATTGCGCAATGGGGGCAACTCTGACCCAGCAACGCCGCGTGGAGGAAGAAGG  
TTTTCGGATTGTAAACTCCTGTCCTTGGAGACGAGTAGAAGACGGTATCCAAGGAGGAAG  
CCCCGGCTAACTACGTG

>6108 len=137 tot-seq=1

CAAGCCTGATGGAGCAACGCCGCGTGAGTGAAGAAGGGTTTCGGCTCGAAAAGCTCTGTT  
GTTGATGAAGAAGGACAGGGGTAGTAACTGGCCTTTGTTTGACGGTGATCAATTAGAAAG  
TCACGGCTAACTACGTG

>6109 len=137 tot-seq=1

GCGCGCAAATTACCCAATCCGGCACGGAGAGGTAGTGACGAAAATAACGATACGGGGA  
CTCTTCTGAGCCTCCGTAATCGGAATGAGTTCGCTGTAAACACGCGGGCGAGGATCCATT  
GGAGGGCAAGTCTGGTG

>6110 len=137 tot-seq=1

TGGGGAATATTGGACAATGGAGGAAACTCTGATCCAGCAATTCTATGTGTGCGAAGAAGG  
TTTTAGGACTGTAAACACTCTTAGTAGGGAAGAAAAAATGACGGTACCTACAGAAGAAG  
CAACGGCTAAATACGTG

>6111 len=137 tot-seq=1

TGGGGGATATTGCACAATGGGGGAAACCCTGATGCAGCAATGCCGCGTGAAGGAAGAAGG  
TCTTCGGATTGTAAACTTCTGTTTTTCGTGACGAAGAAGTGACGGTAGCGAAAAAGAAAG  
CTCCGGCTAACTACGTG

>6112 len=137 tot-seq=1

TGAGGAATTTCCGCAATGGGCGAAAGCCTGACGGAGCAATGCCGCGTGAAGGATGAAGG  
CCTGTGGGTTGTAAACTTCTTTTCTCAGAGAAGAATTTCTGACGGTATCTGAGGAATAAG  
CATCGGCTAACTCTGTG

>6113 len=137 tot-seq=1

TAGGGAATCTCCACAATGGACGCAAGTCTGACGGAGCAATGCCGCGTGGAGGTAGAAGG

CCCACGGGTCGTGAACTTCTTTTCCCGGAGAAGAAGCAATGACGGTATCTGGGGAATAAG  
CATCGGCTAACTCTGTG

>6114 len=137 tot-seq=1

TGGGGAATATTGCGCAATGGGGGAAACCCTGACGCAGCAACGCCGCGTGAAGGAAGAAGG  
TTTTCGGATTGTAACTTCTGTTCTTAGGGAAGAAAAACGACGGTACCTAAGGAGCAAG  
CCACGGCTAACTACGTG

>6115 len=137 tot-seq=1

TGGGGAATATTGGGCAATGGGCGCAAGCCTGACCCAGCAACGCCGCGTGAAGGAAGAAGG  
CTTTCGGGTTGTAACTTCTTTTAATGGGGAAGAGCAGAAGACTGTACCCATAGAATAAG  
CCACGGCTAACTACGTG

>6116 len=137 tot-seq=1

TGGGGAATATTGGGCAATGGGCGGAGTCTGACCCAGCAACGCCGCGTGAAGGAAGAAGG  
CTTTCGGGTTGTAACTTCTTTTAAGGGGGAACAGCAGAAGAGGGTACCCCTTGAATAAG  
CCACGGCTAACTACGTG

>6117 len=137 tot-seq=1

TGGGGGATATTGCACAATGGGGGAAACCCTGATGCAGCGACGCCGCGTGAGTGAAGAAGC  
AATTCGTTGCGTAAAGCTCTATCAGCAGGGAAGAAGAAATGACGGTACCTGAATAAGAAG  
CCCCGGCTAACTACGTG

>6118 len=137 tot-seq=1

TGGGGAATATTGGGCAATGGACGCAAGTCTGACCCAGCAACGCCGCGTGAAGGAAGAAGG  
CTTTCGGGTTGTAACTTCTTTTAACAGGGAAGAGAAGAAGACGGTACCTGTTGAATAAG  
CCACGGCTAACTACGTG

>6119 len=137 tot-seq=1

TGGGGGATATTGGACAATGGGGGGAACCCTGATCCAGCGACGCCGCGTGAGTGAAGAAGT  
ATTCGGTATGTAAGGCTCTGTCAGCAGGGAAGAAATCATGACGGTACCTGACCAAGAAG  
CCCCGGCTAACTACGTG

>6120 len=137 tot-seq=1

CAAGCCTTATGAAGCAATGCCGCGTGAGTGAAGAAGGGTTTCGGCTCGTAAAGCTCTGTT  
GGTAGTGAAGAAAGATAGAGGTAGTAACTGGCCTTTATTTGACGGTAATTAAGTAAAG

TCACGGCTAACTACGTG

>6121 len=137 tot-seq=1

TGGGGAATATTGGACAATGGGGGGAACCCTGATCCAGCGACGCCCGTGAAGGAAGAAGG

CTTTCGGGTTGTAACTTCTTTTGACAGGGAAGAGCAGAAGACGGTACCTGTGCGAATAAG

CCACGGCTAACTACGTG

>6122 len=137 tot-seq=1

TGGGGAATATTGGGCAATGGGCGCAAGCCTGACCCAGCAACGCCCGTGAAGGAAGAAGG

CTTTCGGGTTGTAACTTCTTTAAGGGGGACGAACAAATGACGGTACCCCTTGAATAAG

CCACGGCTAACTACGTG

>6123 len=137 tot-seq=1

TGGGGAATATTGCGCAATGGACGAAAGTCTGACGCAGCGACGCCCGTGAAGGAAGAAGT

ATCTCGGTATGTAAAGCTCTACCAGCAGGGAAGAAGAAATGACGGTACCTGAGTAAGAAG

CCCCGGCTAACTACGTG

>6124 len=137 tot-seq=1

TGGGGAATATTGGGCAATGGGCGAAAGCCTGACCCAGCGACGCCCGTGAAGGAAGAAGG

TCTTCGGATTGTAACTTTTGTCAACAGGGAAGAAGAAGTACGGTACCTGTTAAGAAAAG

CCACGGCTAACTACGTG

>6125 len=137 tot-seq=1

TGGGGGATATTGGACAATGGGGGAAACCCTGATCCAGCGACGCCCGTGAAGGAAGAAGT

ATTTTCGGTATGTAAAGCTCTGTGACAGGGAAGAAAGAAATGACGGTACCTGGGGAGGAA

GCTCCGGCTAACTACGT

>6126 len=137 tot-seq=1

TGGGGAATTTTCGGCAATGGGGGGAACCCTGACCCAGCAACGCCCGTGAAGGAAGAAGG

CTTTCGGGTTGTAACTTCTTTAAGAGGGAAGAGCAGAAGACGGTACCTCTTGAATAAG

CCACGGCTAACTACGTG

>6127 len=137 tot-seq=1

TGGGGAATATTGGGCAATGGAGGAAACTCTGACCCAGCAACGCCCGTGAAGGAAGAAGG

CTTTCGGGTTGTAACTTCTTTTGACAGGGAAGAGCAGAAGACGGTACCTGTGCGAATAAG

CCACGGCTAACTACGTG

>6128 len=137 tot-seq=1

TAGGGAATCTTCCACAATGGGCGAAAGCCTGATGGAGCAACACCGCGTGAAGGAAGAAGG  
CTTTCGGGTTGTAACTTCTTTTGACAGGGAAGAGCAGAAGACGGTACCTGTGCGAATAAG  
CCACGGCTAACTACGTG

>6129 len=137 tot-seq=1

TGGGGAATATTGCGCAATGGGGGAAACCCTGACGCAGCAACGCCGCGTGCGGGACGAAGG  
CGTCCGCGTCGTAAACCGCTTTCAGCGGGGAACCAATCGAGGGTACCCGCGAGAAGAAG  
CGCCGGCTAACTACGTG

>6130 len=137 tot-seq=1

TGGGGGATATTGCGCAATGGGGGCAACCCTGACGCAGCAATACCGCGTGAGTGAAGAAGG  
TTTTCGGATCGTAAAGCTCTGTTATTGGGGAAGAAGCAGTGACGGTACCCAATGAGTAAG  
TCCCGGCTAACTACGTG

>6131 len=137 tot-seq=1

TGGGGAATATTGCACAATGGGGGAAACCCTGACCCAGCAACGCCGCGTGAAGGAAGAAGG  
CTTTCGGGTTGTAACTTCTTTTAAGAGGGAAGAGAAGAAGACGGTACCTCTTGAATAAG  
CCACGGCTAACTACGTG

>6132 len=137 tot-seq=1

TGGGGAATATTGCGCAATGGACGAAAGTCTGACGCAGCGACGCCGCGTGAGTGAAGAAGT  
ATTTGGTACGTAAAGCTCTATCAGCAGGGAAGAAAAAGGACGGTACCTGAGTAAGAAG  
CCCCGGCTAACTACGTC

>6133 len=137 tot-seq=1

TGGGGAATATTGGGCAATGGGCGGAAGCCTGACCCAGCGACGCCGCGTGAAGGAAGAAGG  
CTTTCGGGTTGTAACTTCTTTTCTAAGGGACGAATAGATGACGGTACCTTAGGAATAAG  
CCACGGCTAACTACGTG

>6134 len=137 tot-seq=1

GAACCATGACCGAGCAAAGCCGCGTGAGTGATGAAGGTAGGAGGAGAGGAAAAAGAGGGG  
AGGAGGGAAGAACAGAGGGGGGAAGGAACGGGGCACAGAGGGACGGGACCGAAGCAGAAAAG  
ACACGGCGAACGACGGG

>6135 len=137 tot-seq=1

TGGCAGAGAGAAGGGTGAGCGGCTGTGTCACTGGTGGCCCCAGGCACCTGTGCTCTCAGC  
TGCTGACCCTGGGCAACTTTGTCTTAACTAACAGCTAAGAATCTCTAGTCATGGGAAAC  
TGCAGTAACAGCACAGG

>6136 len=137 tot-seq=1

TAGGGAATTTCCGCAATGGGCGAAAGCCTGACGGAGCAACGCCGCGTGAGTGATGACGG  
CCTTCGGGTTGTAAAGCTCTGTTCTTAGGGAAGAAGTTCTGACGGTACCTAAGGAGAAAAG  
CCCCGGCTAACTACGTG

>6137 len=137 tot-seq=1

TGGGGAATCTCCGCAATGGACGAAAGTCTGACGGAGCAACGCCGCGTGAGTGATGACGG  
TCTTCGGATTGTAAAGCTCTGTTATTGGGGAAGAAAACATGACGGTACCCAATGAGGAAG  
TCCCGGCTAACTACGTG

>6138 len=137 tot-seq=1

ACTCCTCTGAGAGATAGGAACTCTATCTTCTCATTGCCAGACTGGGAAGTCAAGGTGG  
ACATCCTGTCTTGGCCAGACAAATGTCTCCTGCAGGACCCAGCTCCAGTGTGATTGCTTG  
GGTTTTTCTGGTTAC

>6139 len=137 tot-seq=1

TAGGGAATCTCCACAATGGACGCTGAGTGAAGAAGTTTTCGGATCGTAAAGCTCTGTT  
GTTGGTGAAGAAGGATAGAGGTAGTAACTGGCCTTTATTGACGGTAATCAACCAGAAAAG  
TCACGGCTAACTACGTG

>6140 len=137 tot-seq=1

TAGGGAATCTTCGCAATGGACGGAAGTCTGACCCAGCAACGCCGCGTGAAGGAAGAAGG  
CTTTCGGGTTGTAACTTCTTTTGTGAGGGAAGAGTAGAAGACGGTACCTGACGAATAAG  
CCACGGCTAACTACGTG

>6141 len=137 tot-seq=1

TGGGGAATATTGCACAATGGGGGAAACCCTGATGCAGCAACGCCGCGTGAGCGAAGAAGG  
CCTTTGGGTCGTAAAGCTCTGTCTTGGGGAAGAAAAAATGACGGTACCCAAGGAGGAAG  
CCCCGGCTAACTACGTG

>6142 len=137 tot-seq=1

TGGGGGATATTGCACAATGGGGGAAACCCTGATGCAGCAACGCCGCGTGTGGGAAGAAGG

TTTTCGGATTGTAAAGCTCTGTTATTGGGGAAGAAAACATGACGGTACCCAATGAGGAAG  
TCCCGGCTAACTACGTG

>6143 len=137 tot-seq=1

CTTCATCGCATCCAGTTGGTTAATCCCCTCTCTGTCAATCACCTGCATACAAGCTGAAAA  
AACTATAAATTCACATTTCTGGAGCCACATGGTCAAAAATAGCACTTTATATTCAGTGTGA  
AATTCTTAAAATGAAAC

>6144 len=137 tot-seq=1

TGGGGAATATTGGACAATGGACGCAACTCTGGTCCAGCAACTCTGTGTGTGTGAAGAAGG  
TTTTAGGACTGTAAACACTTTTAGTAGGGAGGAAAAAATGACGGTACCTACAGAAGAAG  
CGACGGCTAAATACGTG

>6145 len=137 tot-seq=1

GGACGAGAGTCTGAACCAGCCAAGTAGCGTGCAGGATGACGGCCCTATGGGTGGTAACT  
GCTGTTGTTTGGGAATAATCGACAGTACGTGTAATGGTTTGCATGTACCATTGAAGAAG  
GACCGGCTAATCCGTG

>6146 len=137 tot-seq=1

TGGGGAATATTGCGCAATGGCCGAAAGGCTGACGCAGCGACGCCGCGTGTGGGATGAAGG  
TCTTCGGATTGTAAACCACTGTCGGGAGGGACGAAGCTCTGACGGTACCTCCAAAGGAAG  
CACCGGCTAACTCTGTG

>6147 len=137 tot-seq=1

TGGGGAATATTGCACAATGGGCGAAAGCCTGATGCAGCGACGCGGCGTGAGGGATGACGG  
TTTTCGGATTGTAAACCTCTGTCTTCAGTAACGAATCAATGACGGTAACTGAGGAGGAAG  
CCACGGCTAACTACGTG

>6148 len=137 tot-seq=1

CCATTTCTGGCCAGACTGGGCTAGGGGACAGGGAGGGGCCCGCACCCAGGATAGCTTGAT  
GCCAAGCTCACTTTCCAAGCAGGCCTTACCGGTGAACAGGAACAGCAGGGTCCAGCCGA  
GCTGTTCCAGTCACCA

>6149 len=137 tot-seq=1

TCGTACTACATTCTGCCACTGAGGAGGATAGGGCCACCTTCAGTGATGGCAGCCTAGGC  
TGGTGGCTAGGGAACACCTGCCCTGCTCTTGCCTCAGCCCCATTGGCAGCAGCCCTCGCC

TTCACTGCATTTTAGTC

>6150 len=137 tot-seq=1

TGGGGAATATTGCGCAATGGGGGAAACCCTGACGCAGCGACGCCGCGTGCGCGAAGAAGT  
ATTCGGTATGTAAAGCTCTATCAGCAGGGAAGAAAAATGACGGTACCTGACTAAGAAG  
CCCCGGCTAACTACGTG

>6151 len=137 tot-seq=1

TAGGGAATCTTCGGCAATGGGGGCAACCCTGACCGAGCAACGCCGCGTGAAGGAAGAAGG  
CTTTCGGGTTGTAAACTTCTTTAAGGGGGAAGAGCAGAAGACGGTACCCCTTGAATAAG  
CCACGGCTAACTACGTG

>6152 len=138 tot-seq=1

TCGAGAATATTGACAATGGACGAAAGTCTGATCGAGCGACGCCGCGTGCAGGATGAAGG  
CCTTCGGGTTGTAAACTGCGGTAGCTAGGGAGGAACTTCGGTGACTGTACCTAGCGGAAA  
GTGGTTGGTAACTACGTG

>6153 len=138 tot-seq=1

TTCAGTCCCTTAGCAGCTCCAGACCAGTCTAGACTGGCAATCAGCACACATGAACTGGC  
AGCTCTGTCCAGGTAGATGGTACACATGAACTGGCAGCTTCAGACTAGTCCTTTCAGCAG  
GCAGACACCAGGCATTAA

>6154 len=138 tot-seq=1

TGGGGAATATTGCACAATGGGCGAAAGCCTGATGCAGCGACGCCGCGTGAGTGAAGAAGT  
ATTCGGTATGTAAAGCTCTATCAGCAGGGAAGAAAGAAGTACGGTACCTGCATAAGAA  
GCCCCGGCTAATTACGTG

>6155 len=138 tot-seq=1

TGGGGAATATTGGCCAATGGAGGAAACTCTGAACCAGCAACGTCGCGTGAATGATGAAGG  
TCTTCGGATTGTAAAGTTCTTCTAAGGGAAGAAGATAGTGACGGTACCTTAGGAATAA  
GCCTCGGCTAACTACGTG

>6156 len=138 tot-seq=1

TAGGGAATCTTCGGCAATGGGGGCAACCCTGACCGAGCAACGCCGCGTGAAGGAAGG  
TTTTCGGATTGTAAACTCTTTAAGTGGGGACGAAGAAAGTACTGTACCCACAGAATAA  
GCCTCGGCTAACTACGTG



>6157 len=138 tot-seq=1

GGGCAGGGAGGAAGGGAGTGGAGAATCAGCTGATGGGAGGTAATTCCTAGAAAAAATG  
GCTGTGGAGGTTAGGGGAATGTTTTAAAGTACTAGGGGGGAAAAGGTGAGAAACGTGGTT  
CTATCTACTGGAATGTAT

>6158 len=138 tot-seq=1

TGGGGAATATTGCACAATGGGCGCAAGCCTGATGCAGCCATGCCGCGTGAAGGAAGAAGG  
CCTTCGGGTTGTAACTTCTTTTCTTAGGGACGAAGAAAGTGACGGTACCTAAGGAATAA  
GCCACGGCTAACTACGTG

>6159 len=138 tot-seq=1

GGGAAACCCTGATGCAGCGACGCCGCGTGAGTGAAGAAGGTCTTCGGATCGTAAAGCTCT  
GTTGTAAGTGAAGAACGGCTCATAGAGGAAATGCTATGGGAGTGACGGTAGCTTACCAGA  
AAGCCACGGCTAACTACG

>6160 len=138 tot-seq=1

TATTACAATTTAGGAAGGGCAGAGGGAAGATCCCCTTACCTCACAGGACCTGCTCGGGA  
CCTCTGTTTGAGAGTGGTGGCTTGGCAGCCTTAGGTGAGGGGCTGGGAGAGAATTGCAA  
AGCCACCTCTATTTGCCT

>6161 len=138 tot-seq=1

TGGGGGATATTGGACAATGGGGGAAACCCTGATCCAGCGACGCCGCGTGAGTGAAGAAGT  
ATTTAGGTATGTAAAGATCTATCAGCAGGGAAGAAGGAAATGACGGTACCTGAGTAAGAA  
GCCCCGGCTAACTACGTG

>6162 len=138 tot-seq=1

TGGGGAATATTGCACAATGGGCGAAAGCCTGATGCAGCGACGCCGCGTGAAGGATGAAGT  
ATTTCGGTATGTAAAGCTCTATCAGCAGGGAAGAAGGAAATGACGGTACCTGAGTAAGAA  
GCCCCGGCTAACTACGTG

>6163 len=138 tot-seq=1

GCAAGCCTGATGCAGCCATGCCGCGTGTATGAAGAAGGCCTTCGGGTTGTAAAGTACTGT  
GTGCGTTGAGGAAGGGAGTAAATGTAATACCCTTGCTCATTGACGTTACCCGCAGAAGAA  
GCACCGGCTAACTCCGTG

>6164 len=138 tot-seq=1

GCTTGAGACCTGTCACTGTCTGTGGTTTTAGCCTGGGGTCTTCCCAGCGGTGGAAGCCTT  
TAGGGGCAGCTAAAGCAGGGAAGGTGAGGGACCTGAGAAGCCTTAGGTGACAGCCAGCCA  
CAGAACCAGGCTCGCCAG

>6165 len=138 tot-seq=1

TGGGGAATATTGCACAATGGGGGAAACCCTGATGCAGCGACGCCGCGTGAAGGAAGAAGT  
ATCTCGGTATGTAACTTCTATCGACAGGGAAGAAAGAAATGACGGTACCTGAATAAGAA  
GCCCCGGCTAACTACGTG

>6166 len=138 tot-seq=1

TGGGGAATATTGCACAATGGGCGCAACTCTGACCCAGCAACGCCGCGTGAATGATGAAGG  
TCTTCGGATTGTAAAGTTCTTTCTAAGGGAAGAAGAAAGTGACGGTACCTTAGGAATAA  
GCCTCGGCTAACTACGTG

>6167 len=138 tot-seq=1

TGGGGAATATTGCACAATGGGGGAAACCCTGATGCAGCAACGCCGCGTGAAGGAAGAAGG  
TTTTCGGATCGTAACTTCTATCAATAGGGAAGAAACAAATGACAGTACCTAAAGAAAAA  
GCCACGGCTAACTACGTG

>6168 len=138 tot-seq=1

TGGGGAATATTGCACAATGGGCGCAAGCCTGATGCAGCAATTCTGTGTGCACGATGAAGT  
TTTTCGGAATGTAAAGTGCTTTCAGTTGGGAAGAAGAAAGTGACGGTACCAACAGAAGAA  
GTGACGGCTAAATACGTG

>6169 len=138 tot-seq=1

TGGGGAATATTGCACAATGGGCGAAAGTCTGATGCAGCAACGCCGCGTGAGCGAAGAAGG  
TCTTCGGATCGTAAAGCTCTGTCCTTGGGGAAGAAGAAAATGACGGTACCCTTGGAGGAA  
GCCCCGGCTAACTACGTG

>6170 len=138 tot-seq=1

AAAGTCTGACGCAGCAATACCGTGTGAGGGATGAAGCATTTCGGTGTGTAAACCTCTGTC  
GATGATGAATAAAGCATTTCGAGAGTGAAAAGCTCAAATAAAGAAGGTAATCATGAAGGAA  
GCCACAGCAAAAAAATG

>6171 len=138 tot-seq=1

TAGGGAATATTCCACAATGAGCGAAAGCTTGTGAGCGACACAGCGTGCACGATGAGGG

TCTTCGGATTGTAAAGTGCTGTTATAAGGGAAGAAAAAATGACGGTACCTACAGAAGAA  
GCAACGGCTAAATACGTG

>6172 len=138 tot-seq=1

TGGGGAATATTGGACAATGGAGGAACTCTGATCCAGCAATTCTGTGTGTGTGAAGAAGG  
TTTTAGGACTGTAAAACACTTTTAGTAGGGACGAAGAAAGTGACGGTACCTGTAGAACAA  
GCCACGGCTAACTACGTG

>6173 len=138 tot-seq=1

TTGAACAGATAAGAACCCTTCGTGATTGTGAAATGGGAGAGTTCCTGGCTCCCCCTCG  
CAGGATGTGCAACAAGGGTGTGGCTCTCTGTTTCAGCCACTGCGAGCTCAAACCCCTTACG  
AGATGGGGAGCGTGCAGA

>6174 len=138 tot-seq=1

TGGGGAATCTCCGCAATGGACGAAAGTCTGACGGAGCAACGCCGCGTGAGTGAAGACGG  
TCTTCGGATTGTAAACTGCTTTTATGCGGGGATAAAGGAGTCCACGTGTGGGCTTTTGCA  
GGTACCGCATGAATAAGG

>6175 len=138 tot-seq=1

TGGGGAATCTCCGCAATGGACGAAAGTCTGACGGAGCAACGCCGCGTGAGTGAAGAAGG  
TCTTCGGATTGTAAAGCTCTGTTATACGGGACGAAAAAATGACGGTACCTACAGAAGAA  
GCAACGGCTAAATACGTG

>6176 len=138 tot-seq=1

AAGTGAGCGTGTGGCTCCGACATTGCGGGAGGAGGATCTATGTACCAGGTGGGTGGGGGA  
ATGAGGGGGCCTTAGAGATCATAACAGGCCCCAGAATCTAAACGGAGGCTGATGGAGATGA  
TCCTCTGGGCTTCCACTC

>6177 len=138 tot-seq=1

AAAACAGAGTTGTAACACTTGAGGTCTGTCACTACCAAAGCTCTTCCAGAGCCACTATT  
TCCCTGGCAGGCAGTGGAGCTGATCAGATGAACAAGCAGCCATAGTGTGCTGCCTCATG  
TGACACCTGCCTCTCTGA

>6178 len=138 tot-seq=1

TATTGGGAGGGGAAGCTGGGGAGAAGTCAAAATTACAAAGAGAGCCATTTCTGGTGCTTT  
TTCATGGCTAGGTTCAAGTTCACCTGCACTGAGGACCACAGCATCCTAATCCATGACAAT

GACCTTGTGTTCCCTATT

>6179 len=138 tot-seq=1

TGGGGAATCTTCCGCAATGGACGAAAGTCTGACGGAGCAACGCCGCGTGAGTGAAGACGG  
CCTTCGGGTTGTAAAGCACTTTCGGAGGGGAGGAAAAAATGACGTTACCCTCAGAAGAA  
GCACCGGCTAACTCCGTG

>6180 len=138 tot-seq=1

TGGGGAATATTGCGCAATGGGGGAAACCCTGACGCAGCCATGCCGCGTGTGTGAAGAAGG  
CCTTCGGGTTGTAAAGCACTTTCGGAGGGGAGGAAAAAATGACGTTACCCTCAGAAGAA  
GCACCGGCTAACTCCGTG

>6181 len=138 tot-seq=1

TAGGGAATCTTCGGCAATGGACGGAAGTCTGATGGAGCCATGCCGCGTGTGTGAAGAAGG  
CCTTCGGGTTGTAAAGCACTTTCGGAGGGGAGGAAAAAATGACGTTACCCTCAGAAGAA  
GCACCGGCTAACTCCGTG

>6182 len=138 tot-seq=1

TGGGGAATTTTGGACAATGGGGGAAACCCTGATCCAGCCATGCCGCGTGCGGGATGAAGG  
CCTTCGGGTTGTAAAGCACTTTCGGAGGGGAGGAAAAAATGACGTTACCCTCAGAAGAA  
GCACCGGCTAACTCCGTG

>6183 len=138 tot-seq=1

GGAAGGAAAAGCTAGTTTAGTTGGGTTTTCTGTTCCCTGTAAGTAAAGCATCCTCTTGG  
GCAGTCACTGCTAAGAGAAGTCCAGATCTCGCTCCCATTTTAGATCTGGGAATCCCGCTG  
CTTTGGCAGGAGCCCATC

>6184 len=138 tot-seq=1

TGGGGAATTTTCCGCAATGGGCGAAAGCCTGACGGAGCAATACCGCGTGAGGGAAGAAGG  
CTCTTGGGTTGTAAACCTCTTTCTTGGGGAAGAAAAAATGACGGTACCCAAGGAATCA  
GCATCGGCTAACTCCGTG

>6185 len=138 tot-seq=1

TGGGGAATATTGCACAATGGAGGAAACTCTGATGCAGCAACGCCGCGTGAACGAAGAAGG  
CTCTTGGGTCGTAAAGTTCTGTTATGAGGGAAGAAGAAAGTGACGGTACCTCAGGAGAAA  
GCCCCGGCTAACTACGTG

>6186 len=138 tot-seq=1

TGGGGAATCTTGACAATGGGCGAAAGCCTGATGCAGCAACGCCGCGTGAGCGAAGAAGG  
CCTTTGGGTCGTAAAGCTCTGTCTGGTAGGGAAGAAGGAAGTGACGGTACCTACCGAGGAA  
GCCCCGGCTAACTACGTG

>6187 len=138 tot-seq=1

AATCTTCCACAATGGACGATTGTCTGATGGAGCAACGCCGCGTGAGTGAAGAAGGTTTTTC  
GGCTCGTAAAGCTCTGTTGTTGGTGAAGAAGGACAGAGGTAGTAACTGGCCTTTATTTGA  
CGGTAATCAATTTGCTCG

>6188 len=138 tot-seq=1

TGGACGAGAGTCTGAACCAGCCAAGTAGCGTGCAGGATGACGGCCCTATGGGTTGTAAAA  
TGATTTTGTGGGAATAATAGAAATTAAGTGAATGTTTTGCATGTACCATTGAATAA  
GGACCGGCTAATTACGTG

>6189 len=138 tot-seq=1

GGTGTGGCTATGTAGCATCAGCAGGAGGCATCCTGGGCAGCTCAGACCCGGAGGGCTGTC  
CGGAGAGCCAGGTGAGGAGACAGGCAGGGGCCAGGCAGCTCGGGAGTCCGGGAAGCAGAA  
AGTGCCTGATGAAAACCC

>6190 len=138 tot-seq=1

TGGGGAATATTGGGCAATGGGCGCAAGCCTGACCCAGCAACGCCGCGTGAGGGAAGAAGG  
CCTTCGGGTTGTAAACCTCTGTCTATGGGAAGAAGAAAGTGACGGTACCATAGGAGGAA  
GCTCCGGCTAACTACGTG

>6191 len=138 tot-seq=1

GCTGATCCCAGGCTCTGGAGCTAGTCTTGGGTTCAAATCCCAGCTCCAGCAGTTACCAGC  
TGTGTGCCCTTTGACACGTTTCCTGATCTCTCAAGTTTCCTATCAAGGTTTTTGTCTGT  
CAAGCTGTTTCCTCAAAC

>6192 len=138 tot-seq=1

TAGGGAATCTTCGGCAATGGACGGAAGTCTGACCGAGCAACGCCGCGTGAGTGAAGAAGG  
CCTTCGGGTTGTAAACTCTTTGGACAGGGACGAAGAAAGTGACGGTACCTGTAGAACAA  
GCCACGGCTAACTACGTG

>6193 len=138 tot-seq=1

TAGGGAATCTTCGGCAATGGACGGGAGTCTGACCGAGCAACGCCGCGTGAGTGAAGAAGG  
TTTTAGGACTGTAAAACACTTTTTAGTAGGGAAGAAAAAATGACGGTACCTACAGAAGAA  
GCAACGGCTAAATACGTG

>6194 len=138 tot-seq=1

TGGGGAATATTGGGCAATGGAGGAACTCTGACCCAGCAATGCCGCGTGAATGAAGAAGG  
TCTTCGGATTGTAAAGTTCTTTAGTTAGGGAAGAATAAAATGACGGTACCTAAAGAATAA  
GCCCCGGCTAACTACGTG

>6195 len=138 tot-seq=1

GAGGACTACAGAGTGACGGTGTCACACTGCGAGAGTCTGCCACTTGGGCAGGGAGCCTCC  
CTGGAGCCACGCAGGAAGAGCAGGAGTTTCCAAGAGAACAAGACAGAACTCCGCATAGCC  
TGATCCCTTGTCCAAAC

>6196 len=138 tot-seq=1

TGGGGAATCTTCGCAATGGACGAAAGTCTGACGGAGCAATTCTGTGTGTGTGAAGAAGG  
TTTTAGGACTGTAAAACACTTTTTAGTAGGGAAGAAAAAATGACGGTACCTACAGAAGAA  
GCAACGGCTAAATACGTG

>6197 len=138 tot-seq=1

TGGGGAATATTGCACAATGGGGGAAACCCTGATCCAGCAATTCTGTGTGTGTGAAGATGG  
TTTTAGGACTGTAAAACACTTTTTAGTAGGGAAGAAAGAAATGACGGTACCTACAGAAGAA  
GCGACGGCTAAATACGTG

>6198 len=138 tot-seq=1

TAGGGAATCTTCACAATGGACGCAAGTCTGATGGAGCAACGCCGCGTGAGTGAAGAAGG  
GTTTCGGCTCGTAAAGCTCTGTTGTTGGTGAAGAAGGAAATGACGGTACCTGACCAAGAA  
GCCCCGGCTAACTACGTG

>6199 len=138 tot-seq=1

TGGGGAATATTGCACAATGGGCGCAAGCCTGATGCAGCCATGCCGCGTGTATGAAGAAGG  
CCTTCGGGTTGTAAAGTACTTTTCAGTTGGGAAGAAGTCAGTGACGGTACCAACAGAAGAA  
GCGACGGCTAAATACGTG

>6200 len=138 tot-seq=1

TGGGGAATATTGCACAATGGGCGCAAGCCTGATGCAGCAACGCCGCGTGAAGGAAGAAGG

CCCTCGGGTTGTAACTTCTTTAACAGGGACGAAGAAAGTGACGGTACCTGTTGAATAA  
GCCACGGCTAACTACGTG

>6201 len=138 tot-seq=1

TGGGGAATATTGGACAATGGAGGAACTCTGACCCAGCAACGCCGCGTGAGTGATGAAGG  
CCTTCGGGTTGTAAACTCTTTGGACAGGGACGAAGAAAGTGACGGTACCTGTAGAACAA  
GCCACGGCTAACTACGTG

>6202 len=138 tot-seq=1

TGGGGAATATTGGGCAATGGGCGAAAGCCTGACCCAGCGACGCCGCGTGAGGGAAGAAGG  
TCTTCGGATTGTAACTCTGTTGACAGGGAAGAAGAAAGTGACGGTACCTGTCGAGGAA  
GTCACGGCTAACTACGTG

>6203 len=138 tot-seq=1

TGGGGAATATTGCACAATGGGGGAAACCCTGATGCAGCGATGCCGCGTGGAGGAAGAAGG  
TTTTCGGATTGTAACTCCTGCCTTAAAGGAAGAAGTCAGTGACGGTACTTTAGGAGGAA  
GCTCCGGCTAACTACGTG

>6204 len=138 tot-seq=1

TTGGGAATATTGGACAATGGAGGAACTCTGATCCAGTGACGCCGCGTGAAGGAAGAAGG  
TCTTCGGATTGTAACTTATTTATCAGGGAAGAAGAAAGTGACAGTACCTGAAGAAAAA  
GGACCGGCAAACACTACGTG

>6205 len=138 tot-seq=1

TGAGGAATATTGGTCAATGGGCGGAGCCTGAACCAGCGACGCCGCGTGAGTGAAGAAGT  
ATTTCCGGTATGTAAAGCTCTATCAGCAGGGAAGAAGAAATGACGGTACCTGACCAAGAA  
GCCCCGGCTAACTACGTG

>6206 len=138 tot-seq=1

TGGGGAATATTGGGCAATGGGCGCAAGCCTGACCCAGCAACGCCGCGTGAAGGAAGAAGG  
CCTTCGGGTTGTAACTTCTTTGACCAGGGAAGAAACAAATGACGGTACCTGGAAAACAA  
GCCACGGCTAACTACGTG

>6207 len=138 tot-seq=1

TGGGGGATATTGCACAATGGGGGAAACCCTGATGCAGCGACGCCGCGTGAGTGAAGAAGT  
ATTTCCGGTATGTAAAGCTCTATCAGCAGGGAAGAAGAAATGATAGTACCTGAAGAAAAA

GCATCGGCTAACTCCGTG

>6208 len=138 tot-seq=1

TGGGGAATATTGGGCAATGGGCGCAAGCCTGACCCAGCAACGCCGCGTGAAGGAAGAAGG

TTTTCGGATTGTAACTTCTTTTATGAGGGACGAAACAAATGACGGTACCTCATGAATAA

GCCACGGCTAACTACGTG

>6209 len=138 tot-seq=1

TGGGGAATATTGCACAATGGGGGAAACCCTGATGCAGCAACGCCGCGTGAAGGACGAAGG

CTTTCGGGTTGTAACTTCTATCGATGGGGAAGAAAAAATGACGGTACCCAAGTAAGAA

GCCCCGGCTAACTACGTG

>6210 len=138 tot-seq=1

TCGAGAATTTTTACAATGGGGGAGACCCTGATGGAGCGACGCCGCGTGGAGGATGAAGG

CCCTTGGGTTGTAACTCCTGTCATAAGGGAACAAGAAAGTGATAGTACCTTAAGAGGAA

GAGACGGCTAACTCTGTG

>6211 len=138 tot-seq=1

TGGGGAATATTGGACAATGGGGGGAACCCTGATCCAGCGACGCCGCGTGAGTGAAGAAGT

AATTCGTTATGTAAAGCTCTATCAGCAGGGAAGAAGAAAGTGACGGTACCTGACTAAGAA

GCCCCGGCTAACTACGTG

>6212 len=138 tot-seq=1

TGGGGAATATTGCGCAATGGGGGAAACCCTGACGCAGCGACGCCGCGTGAAGGAAGAAGG

CTTTCGGGTTGTAACTTCTTTTCTCGGGGACGAAGCAAGTGACGGTACCTGAGGAATAA

GCCACGGCTAACTACGTG

>6213 len=138 tot-seq=1

TGGGGAATATTGGGCAATGGGGGAAACCCTGACCCAGCAACGCCGCGTGAAGGATGAAGG

CTTTCGGGTTGTAACTTCTTTGATCAGGGACGAAACAAATGACGGTACCTGAAGAACAA

GCCACGGCTAACTACGTG

>6214 len=138 tot-seq=1

TGGGGAATATTGGGCAATGGGCGAAAGCCTGACCCAGCAACGCCGCGTGAGTGATGAAGG

CCTTCGGGTTGTAAACTCTTTGGACAGGGACGAAGAAAATGACGGTACCTTACTAAGAA

GCTCCGGCTAAATACGTG



>6215 len=138 tot-seq=1

TGGGGAATATTGCACAATGGGGGAAACCCTGATGCAGCGACGCCGCGTGAGTGAAGAAAT  
ATTTCCGGTATGTAAAGCTCTGTCAGCAGGGAAGAAAGCAATGACGGTACCTGACCAAGAA  
GCCCCGGCTAACTACGTG

>6216 len=138 tot-seq=1

TGGGGAATATTGGGCAATGGAGGCAACTCTGACCCAGCAACGCCGCGTGAGCGATGAAGG  
TCTTCGGATTGTAAAGCTTTTTAAGCGGGGACGAAGAAAGTGACTGTACCCGCAGAATAA  
GCCTCGGCTAACTACGTG

>6217 len=138 tot-seq=1

TGGGGAATCTTGCACAATGGGCGAAAGCCTGATGCAGCGACGCCGCGTGGGCGAAGAAGG  
CCTTTGGGCCGTAAAGCCCTGTCGGGAGGGAAGAAGGAAGCGACGGTACCTCCAAGGAA  
GCCCCGGCTAACTACGTG

>6218 len=138 tot-seq=1

TGGGGGATATTGCACAATGGGGGAAACCCTGATGCAGCGACGCCGCGTGAGGGAAGACGG  
CCTTCGGGTTGTAAACCTCTGTCGAGGGGACGAAGGAGATGACGGTACCCTGTGAGGAA  
GCCACGGCTAACTACGTG

>6219 len=138 tot-seq=1

TGGGGGATATTGGACAATGGGGGAAACCCTGATCCAGCGACGCCGCGTGAGTGAAGAAGT  
ATTTCCGGTATGTAAAGCTCTGTCAGCAGGGAAGAAAGAAATGACGGTACCAAAGAACAA  
GCCCCGGCTAACTACGTG

>6220 len=138 tot-seq=1

GGAGCGAGAGCCGGAACCAGCCAAGGAGCGGGCAGGAGGACGGCCCCGAGGGGGGGGAAAC  
TGCTTTTATAAGGGAATAAAGTGAGAGTCGTGACTCTTTTTGCATGTACCTTATGAATAA  
GGACCGGGTAATTCCGTG

>6221 len=138 tot-seq=1

TGGGGAATCTCCGCAATGGACGAAAGTCTGACGGAGCAACGCCGCGTGAAGTATGAAGG  
CCTTCGGGTTGTAAACTTCTTTGATCAGGGAAGAAACAAATGACGGTACCTGAAAAACAA  
GCCACGGCTAACTACGTG

>6222 len=138 tot-seq=1

TGGGGAATATTGCACAATGGGGGAAACCCTGATGCAGCAACGCCGCGTGAGCGAAGAAGG  
CCTTTGGGTCGTAAAGCTCTGTCTCAGGGAAGAAGGAAGTGACGGTACCTGAGGAGGAA  
GCCCCGGCTAACTACGTG

>6223 len=138 tot-seq=1

TGGGGAATATTGCACAATGGGCGAAAGCCTGATGCAGCGACGCCGCGTGAGCGAAGAAGG  
TTTTAGGACTGTAAAACACTTTTAGTAGGGAAGAAAAAATGACGGTACCTTACTAAGAA  
GCTCCGGCTAAATACGTG

>6224 len=138 tot-seq=1

TGGGGGATATTGCACAATGGAGGCAACTCTGATGCAGCAACGCCGCGTGAGTGAAGAAGG  
CTTTGAGTCGTAAAACCTCTGTCTATGGGAAGAAAAAATGACGGTACCTACAGAAGAA  
GCAACGGCTAAATACGTG

>6225 len=138 tot-seq=1

TAGGGAATCTCCGCAATGGGCGAAAGCCTGACGGAGCAACGCCGCGTGAAGGAAGAAGG  
CTTTGGGTTGTAAACTTCTTTTGTGAGGGACGAAGCAAGTGACGGTACCTGACGAATAA  
GCCACGGCTAACTACGTG

>6226 len=138 tot-seq=1

TGGGGAATATTGGACAATGGAGGCAACTCTGATCCAGCAATTCTGTGTGTACGAAGAAGG  
TCTTAGGATTGTAAAGTACTTTTAGTTGGGAAGAAGAAAGTGACGGTACCAACAGAAGAA  
GCGACGGCTAAATACGTG

>6227 len=138 tot-seq=1

TGGGGGATATTGGACAATGGGGGGAACCCTGATCCAGCGACGCCGCGTGAGTGAAGAAGT  
ATTTGGTATGTAAAGCTCTATCAGCAGGGAAGAAGAAAATGACGGTACCTGACTAAGAA  
GCACCGGCTAAATACGTG

>6228 len=138 tot-seq=1

CTTTGACAATGGTCCCAACACCCACATTTAACAAGAGGCAATTTGCTCAGGGTTTTATTC  
CCACAATAAATCTTACCATTTTCTGCTCCTTAGCCTGCCTGTCTTCTCTTCTGTATTA  
CACTAACAGCTCCTTTTC

>6229 len=138 tot-seq=1

TGGGGAATATTGGGCAATGGGGGGAACCCCGACCCAGCAACGCCGCGTGAGGGAAGAAGG

TTTTCGGATTGTAAACCTCTGTCCTCAAGGACGAAGGGAGTGACGGTACTTGAGGAGGAA  
GCCCCGGCTAACTACGTG

>6230 len=138 tot-seq=1

TTGCACAATGGGGAAAACCTGATGCAGCGACGCCGCGTGGGTGAAGGAGCACTTCGGTG  
CGTAAAGCCCTATCGGCAGGGAAGAAAAGGGGGAAAACCCAGACGGTACCTGACTAAGAA  
GCCCCGGCTAACTACGTG

>6231 len=138 tot-seq=1

TGGGGAATATTGGGCAATGGGCGCAAGCCTGACCCAGCAACGCCGCGTGAAGGATGAAGG  
TTTTCGGATTGTAAACTTCTTTAGTCAGGGACGAAAGAAATGACGGTACCTGAAGAATAA  
GCCACGGCTAACTACGTG

>6232 len=138 tot-seq=1

GGAAATGAATAGATTACACAGGCCAGTCAGGACTGTGGCTCCAACCCCGTTAGAAGGAA  
GAAGCAGGGCATTGTGATGAGGCCGCGCCACTGCCTGCTCAGCACAGTGGGCACAAAATGGC  
CCAAAACATGTGTCAAGC

>6233 len=138 tot-seq=1

GCAAGTCTGATGGAGCAACGCCGCGTGAGTGAAGAAGGGTTTTCGGCTCGTAAACTCTGT  
TGTTAGTGAAGAAGGACAAAGATAGTAACTGACCTTTGTTTGACGGTAATCAATTAGAAA  
GTCACGGCTAACTACGTG

>6234 len=138 tot-seq=1

CGGGGAATTTTGGACAATGGGGGCAACCCTGATCCAGCAATTCTGTGTGTGTGAAGAAGG  
TTTTAGGACTGTAAACACTTTTAGTAGGGAAGAAAAAATGACGGTACCTACAGAAGAA  
GCAACGGCTAAATACGTG

>6235 len=138 tot-seq=1

TGGGGAATTTTGGACAATGGGGGCAACCCTGATCCAGCCATGCCGCGTGCAGGATGAAGG  
TCTTCGGATTGTAAACTGCTTTTGTGAGGGAAGAAAAAATGACGGTACCTACAGAAGAA  
GCAACGGCTAAATACGTG

>6236 len=138 tot-seq=1

TGGGGGATATTGCACAATGGGCGCAAGCCTGATGCAGCAACGCCGCGTGAGGGAGGACGG  
TCTTCGGATTGTAAACCTCTGTCCTTGGGGAAGAAACAAATGACGGTACCCTTCGAATAA

GCGCCGGCTAACTACGTG

>6237 len=138 tot-seq=1

TGGGGAATATTGCACAATGGGGGAAACCCTGATGCAGCAACGCCGCGTGTGGGAAGAAGG

TTTTCGGATTGTAAACCACTGTTCTTAGCGAAGAAACAAATGACGGTAACTAAGAAGAAA

GCTCCGGCTAACTACGTG

>6238 len=138 tot-seq=1

TGAGGAATATTGGTCAATGGGCGTAAGCCTGAACCAGCAATTCTGTGTGCACGATGAAGT

TTTTCGGAATGTAAAGTGCTTTCAGTTGGGAAGAAAAAATGACGGTACCAACAGAAGAA

GTGACGGCTAAATACGTG

>6239 len=138 tot-seq=1

GAAAGTCTGATGGAGCAACGCCGCGTGAGTGAAGAAGGTTTTCGGATCGTAAAACCTCTGT

TGTTAGAGAAGAACATGTGTGAGAGTAACTGTTTCATGCAGTGACGGTATCTAACCAGAAA

GCCACGGCTAACTACGTG

>6240 len=138 tot-seq=1

AATGAAAGGGGCCAGGAGGTGACCCCAGGCTGGCCTCTGCCCTCACGGACAAAGCTGCTT

CCCCACGGCAGGTGGGAGTCGCTGCCCTTCTGCTGGCAGTGAGTCCCACCTGGAGTCTTG

CTAAGCCCTTCCTAACTA

>6241 len=138 tot-seq=1

TGGGGAATATTGCACAATGGGGGAAACCCTGATGCAGCGACGCCGCGTGAGTGAAGAAGT

ATCTCGGTATGTAAAGCTCTATCAGCAGGGAAGAAAAAATGACGGTACCTACAGAAGAA

GCAACGGCTAAATACGTG

>6242 len=138 tot-seq=1

CAGTGGGGAATATTGCACAATGGGGGAAACCCGGATGCAGCGACGCCGCGTGAGCGAAGA

AGGTTTTCGAATCGTAAAGCTATGTAATGTTGGAAGATAATGACGGTACCATAGGAGGAA

GCCCCGGCTAACTACGTG

>6243 len=138 tot-seq=1

TGGGGAATCTTGCACAATGGGCGAAAGCCTGACGCAGCGACGCCGCGTGCGGGATGAAGG

CCTTCGGGTTGTAAACCGCTTTCAGCAGGGACGAAGAAAGTACGGTACCTGTAGAACAA

GCCACGGCTAACTACGTG

>6244 len=138 tot-seq=1

TGAGGAATATTGGTCAATGGACGAGAGTCTGAACCAGCAACGCCGCGTGAGTGATGAAGG  
CCTTTGGGTTGTAAACTCTTTGGACAGGGACGAAGAAAGTGACGGTACCTGTAGAACA  
GCCACGGCTAACTACGTG

>6245 len=138 tot-seq=1

TGGGGAATATTGGGCAATGGAGGCAACTCTGACCCAGCAACGCCGCGTGAATGATGAAGG  
TCTTCGGATTGTAAAGTTCTGTGATGGGGGATGAACACAATGACGGTACCCAATAGCAA  
GCCACGGCTAACTACGTG

>6246 len=138 tot-seq=1

TGGGGAATATTGGACAATGGGCGCAAGCCTGATCCAGCAACGTCGCGTGAAGGAAGAAGG  
TCTTCGGATTGTAAACTTCTTTAGACAGGGATGAAAGAAATGACAGTACCTGTAGAATAA  
GCCACGGCTAACTACGTG

>6247 len=138 tot-seq=1

TGGGGAATCTTGACAATGGGCGAAAGCCTGACCCAGCAACGCCGCGTGAAGTATGAAGG  
CCTTCGGGTTGTAAACCTCTTTGATCAGGGAAGAAACAATGACAGTACCTGAAAAACAA  
GCCACGGCTAACTACGTG

>6248 len=138 tot-seq=1

CAACAACAAAAAACAAGCACTTAATTTTCTTCAGAATAAATGTTGCATTTCGTAAAATA  
GCAAGATGGTATAAAAAGTACCAACCAATAAAAAGAATTTGGAAAAAAGAAATGAG  
GGTTTAAAAAAAATCTG

>6249 len=138 tot-seq=1

GCAAGTCTGATGGAGCAACGCCGCGTGAGTGAAGAAGGGTTTCGGCTCGTAAAGCTCTGT  
TGTTGGGGAAGAAGGGCAGGGGTAGTAACTGGCCTTTGTGTGACGGTAATCAATGAGAAA  
GTCACGGCTAACTACGTG

>6250 len=138 tot-seq=1

CGATGGCTGGGAGTTCTTCTTTGACTTGATTGATAGGCCAGTTGAAGCAGTGGAGTATAT  
TACCCTCTGGATGCCTGAAGGCAGTCCGTAGTTCTGCGCCGACCCTACGGGAGTTGCCA  
CAGCCAGCGACATCATCG

>6251 len=138 tot-seq=1

TGGGGAATATTGGGTAATGGGCGCAAGCCTGACCCAGCAACGCCGCGTGAAGGAGGAAGG  
CCCTCGGGTTGTAACTTCTTTTGTTCAGGGACGAAGAAAGTGACGGTACCTGACGAATAA  
GCCACGGCTAACTACGTG

>6252 len=138 tot-seq=1

TGGGGAATATTGGGCAATGGGCGCAAGCCTGACCCAGCAACGCCGCGTGAGGGAAGAAGG  
CTTTCGGGTTGTAACTTTTATTCTGAGGGACGAAGAAAGTGACGGTACCTCAGGAATAA  
GCCACGGCTAACTACGTG

>6253 len=138 tot-seq=1

TGGGGAATATTGCGCAATGGGGGAAACCCTGACGCAGCAACGCCGCGTGAGGGAAGAAGG  
TTTTCGGATTGTAAACCTCTGTCCTAAGGGAAGAAGGAAGTGACGGTACCTTAGGAGGAA  
GCCCCGGCTAACTACGTG

>6254 len=138 tot-seq=1

GAGGCTGTTGAAAGCCAGGTGGGATGGGAGGCCACAGAGTCAAAGCTGTGTTTCCACATT  
GTAGCTGGGGATGCTTAGCAGACACACAGACTGCGCCAGCCCAAACACTCGAAGAAGCTC  
TTTCTGACCACATGTTGG

>6255 len=138 tot-seq=1

TGGGGAATATTGGGCAATGGGCGCAAGCCTGACCCAGCAACGCCGCGTGAAGGAAGAAGG  
CCCTCGGGTTGTAACTTCTTTTATTCGGGACGAAACAAATGACGGTAACTTACCAGAAA  
GGGACGGCTAACTACGTG

>6256 len=138 tot-seq=1

TCTGCACCAAGATCATCCAAAATCAGAAGATCGTAGGCATTGACTGGCAAGAAAGTCA  
GCACGCTCAGAACCGAACAGTCCGGTCATACGATTCAAATCGTCGGGAAATTTGTCATC  
AGAACCGGCACGTCCTGC

>6257 len=138 tot-seq=1

TGGGGAATATTGCACAATGGGCGCAAGCCTGATGCAGCAACGCCGCGTGAGTGAAGAAGG  
CCTTCGGGTTGTAAACTCTGTCCTATGGGAAGAAACAAATGACGGTACCATAGGAGGAA  
GCCCCGGCTAACTACGTG

>6258 len=138 tot-seq=1

TGGGGAATTTTACGCAATGGGCGAAAGCCTGACGTAGCGACACCGCGTGAGCGAAGAAGC

CCTTTGGGGTGTAAAGCTCTGTCGGCTGGAACGAAAAAATGACGGTACCAGCAAAGGAA  
GCATCGGCTAACTACGTG

>6259 len=139 tot-seq=1

TGGGAATCTTGGACAATGGGCGAAAGCCCGATCTAGCAATATCGCGTGAGTGAAGAAGG  
GCAATGCCGCTTGTAAAGCGCTTTCGTTGAGTGCACGATCATGACAGGACTCGAGGAAGA  
AGCCCCGGCTAACTCTGTG

>6260 len=139 tot-seq=1

GACGCACAGCCGGGATGATGCCTCTCAGTCTGCCTTGGACTTGGTCCCTCGTGAGAAAGG  
AGAAGGAAGAAGAAGAGAGAACCAGGACCAGGGGCTGCGGGACTCATGGAAGCAGGGAT  
GGGTCTCTCTATGGCAGAC

>6261 len=139 tot-seq=1

TGGGAATCTTGGACAATGGGCAAATCCCGATCCAACAATATCGCGTGAGTGAAGAAGG  
GCAATGCCGCTTGCAAAGCTTTCGTCGAGTGCACGATCATGACAGGACTCAAGGAGGA  
AGCCCCGGCTAACTCCGTG

>6262 len=139 tot-seq=1

CTGAGTGAAGGTCAAACCCAGCCAGTGCTACCATAATTCATGGTGTAGGAGGCTACTCTG  
GGCCAGGTTGCTTGGAAATCCAAGCCCAGGGTCTTGGAAAGGGCAAACCTCAAGGGCAACAG  
TGGTGCAGAGTAGGAACCC

>6263 len=139 tot-seq=1

AACTTAGGAAATTAGTCTGAACAGGTGAGAGGGTGCGCCAGAGAACCAGACAGCTTCTGG  
GACAGGCGGAAGCACAGAGCCGCTGAGGCAGCACCTTGGCGGGCCGACAGACCCGGCC  
ACTGTCCGGACCAGAGGAC

>6264 len=139 tot-seq=1

TGGGAATATTGCACAATGGGGGGAACCCTGATGCAGCGACGCCGCGTGAGTGAAGAAGG  
GCAATGCCGCTTGTAAAGCTTTCGTCGAGTGCGCGATCATGACAGGACTCGAGGAAGA  
AGCCCCGGCTAACTCCGTG

>6265 len=139 tot-seq=1

ATGGAGGCAACTCTGACCCAGCCATGCCGCGTGGAGGATGAAGGCCCTCTGGGTTGTAAA  
CTTCTTTTACAGGGGACGAAACCTTTCTATTCTTAGGAAGTTGACGGTACCCTGGGAATA

AGCACCGGCTAACTCCGTG

>6266 len=139 tot-seq=1

TAGGGAATCTTCCGCAATGGGCGAAAGCCTGATCCAGCAATATCGCGTGAGTGAAGAAGG  
GCAATGCCGCTTGTAAGCTCTTTCGTCGAGTGAGCGCAAATGACAGGACTCGAGGAAGA  
AGCCCCGGTAACTCCATG

>6267 len=139 tot-seq=1

CGCAAGCCTGATGGAGCAACACCGCGTGAGTGAAGAAGGGTTTCAGCTCGTAAAGCTCTG  
TTGTTGGAGAAGAAGCTGCGGGATAGTAACTGTTACGGAGTGACGGTAACCAACCAGAA  
AGTCACGGCTAACTACGTG

>6268 len=139 tot-seq=1

CGACGACGAAATGAGCAGAGAGGAAGCTGGATTTTCAGGCTGTACATCTCCAGCAGGTGAC  
AATGATGGCTACGGAAACCTCCAGCAGCCGCGTAATTATGAGATCGGAAGCGTCGTGTAG  
GGAAAGAGTGTGCCATGT

>6269 len=139 tot-seq=1

TGCCCCGCCAAGACAGGCAGCAAGGACAGCAGCACACAGACTGACAAGAGTGCCGAGCT  
CTTCTGGCCCAGCATGGCCTCCCTTCCCAGCCGCGGCCGGCTGAGCACGACCCCTGCTCA  
CAGCCCCGTCCTGAAACAC

>6270 len=139 tot-seq=1

TGGAGGTTTACCAGCCAGACAGCTAAATAATCCTTCAATCCTTGACTTTCAGAGGAAAC  
CGCGGGGGTCCATCCTGATTGATTATTCATCCAAAACAGACTTCAGGGCTTTGGGACAG  
CTCAGTTCCACAGGGTCAT

>6271 len=139 tot-seq=1

CGCAAGTCTGATGGAGCAACGCCGCGTAAGTGAAGAAGGGTTTCGGCTCGTAAAGCTCTG  
TTGTTGGTGAAGAAGGACAGGCGTCCTAACTGACCTTTGTTGACGGTAATCAATTAGAA  
AGTCACGGCTAACTACATG

>6272 len=139 tot-seq=1

TAGGGAATCTTCCACAATGGACGAAAGTCTGATGGAGCAACGCCGCGTGAATGAAGAAGG  
CCTTCGGGTCGTAATAATTCTGTTGTCAGAGAAGAACGTGCGTGAGAGTACCTTTCAATA  
AGCGCCGGCTAACTACGTG



>6273 len=139 tot-seq=1

CGCAAGCCTGATGGAGCAACACCGCGTGAGTGAAGAAGGGTTTCGGCTCGTAAAGCTCTG  
TTGGTAGAGAAGAACGTATCAGAGAGTAACTGGTCAGGAAGTGACGGTATCCAACCAGAA  
AGTCACGGCTAACTACGTG

>6274 len=139 tot-seq=1

GGTTGCAGTAAGCCAAGATCGCCCCACTGCATTCCAGCCTGGGTGACAAAGGTAGACTCC  
ATCTCGAACACATGCTGTCCACACCTTCTCCCATAGGTAGCTCTTCTTCATCTACAGGGC  
AAACTCCAAGCTTCTTGGC

>6275 len=139 tot-seq=1

CAATACAGTTTTGAAAACCTCCCTGATCTCCACAAAAAAGACAAAATAACTAAGTAGCA  
AAATCAAACACCCAACAATATTGAGTGACAAAGTACCTTCTCAACAATCCTCAAACCTACA  
GGAGGTTGAAGACAAACCA

>6276 len=139 tot-seq=1

GGAAACCCTGATCCAGCCATGCCGCGTGCAGGATGAAGGCCTTCGGGTTGTAAACTGCTT  
TTGTACGGAACGAAAAGGCGCTCTAATACAGGGCGCACATGACGGTACCGTAAGAATA  
AGCACCGGCTAACTACGTG

>6277 len=139 tot-seq=1

GGACTCTGTGGGTTCAATATCCCCCAGTAGTAATATCAAAAACAACCTTAACCAACTCA  
TCTTAAATACAGAAAAGTTATTACATTTATACAAAATAATACCCTCACAGCAGAAACAGT  
GCACAAATCAGTACATGTA

>6278 len=139 tot-seq=1

TGGGGGATATTGCACAATGGGCGGAAGCCTGATGCAGCGACGCCGCGTGAGGGAAGACGG  
TCCTCTGGATTGTAAACCTCTGTGGAAGGGACGAAGAACGTGACGGTACCTCCGAGGA  
AGCTCCGGCTAACTACGTG

>6279 len=139 tot-seq=1

ACGGCGCCGGAAGGCCACAGCGCAGGCGCGACTCCGGCCTCCTTCCCGAGAGAAGGGGGG  
ACCCTCCCCGCCCTCGTCCGACGAGCACCCGCGCCTGTTACCTGCAGCGCAGCCGGCGCG  
GTCCAGTGAAAGCGCCTCT

>6280 len=139 tot-seq=1

TAGGGAATCTTCGGCAATGGACGGAAGTCTGACCGAGCAACGCCGCGTGAGTGAAGGCCT  
TCGGGTTGTAAACCGCTTTTATTGGGAGCAAGCCTTCGGGTGAGTGACCTTTTGAATA  
AGCGCCGGCTAACTACGTG

>6281 len=139 tot-seq=1

CCTGGGTTCTAACAAGTCTGCCAGCAAGCTCCTATGCATCTCAAGTCCGGGAACCATGCA  
CCAGCAGCCGCGGTAACTAAGATCGGAAGAGCGTCGTGTAGGGAAAGAGTGGGCCAATG  
TGTAGATCTCGGTGGTCGC

>6282 len=139 tot-seq=1

CGAGGAGGAAGGTGTCCCCGTGGAGGCAGCGGACCTGAACCTGGGGGGAGGTCCTGGCC  
AACGAGGGATCACTAGGCTTTTACAGTACGATGATTTCCGTTTCTACTGGGAACACGATG  
TAACAGCTGCAACAAGGCA

>6283 len=139 tot-seq=1

TGAGGAATATTGGACAATGGGTGGAAGCCTGATCCAGCCATCCCGCGTGAAGGAAGACGG  
TTCTATGGATTGTAACTTCTTTTATACAGGGATAAACCTACCCTCGTGAGGGTAGCTGA  
AGGTACTGTATGAATAAGC

>6284 len=139 tot-seq=1

CGCAAGGCGGAGGGAGCAACGCCGCGGGAGGGAAGAAGGGTGGCGGCGGTAAAGCTCTG  
GGGTTGGTGAAGAAGGACAGGGGTAGTAACTGACCTTTGTTTGACGTAATCAATTAGAA  
AGTCACGGCTAACTTCGTG

>6285 len=139 tot-seq=1

TGGGGAATATTGGACAATGGACCAAGAGTCTGATCCCGCAATTCTGTGTGCACGATGAAG  
TTTTCCGGAATGTAAAGTGCTTTCAGTTGGGAAGAAAGAAATGACGGTACCAACAAAAGA  
AGTGACGGCTAACTACGTG

>6286 len=139 tot-seq=1

CGAAAGTCTGAGGGAGCAACGCCGCGTGAGTGAAGAAGGGTTTCGGCTCGTAAAGCTCTG  
GTGGTAGTGAAGAAAGATAGAGGGAGTAACTGGCCTTTATTGGACGGTAATTACTTAGAA  
AGTCACGGCTAACTACGTG

>6287 len=139 tot-seq=1

CGCAAGTCTGATGGAGCAACGCCGCGTGAGTGAAGAAGGGTTTCGGATCGTAAAGCTCGG

TTGTTGGGGAAGAAGGAGAGAGGTAGTAACTGGCCTTTATTTGACGGTAATCAACCAGAA  
AGTCACGGCTAACTACGTG

>6288 len=139 tot-seq=1

CGCAAGTCTGATGGAGCAACGCCGCGTGAGTGAAAAAGTTTTTCGGATCGTAAAGCTCTA  
TTGTTGGTGAAGAAGGATAGATGTAGTAACTGGCCTTTATTTGACGTTAATCAACCAGAA  
AGTCACGGCTAACTACGTG

>6289 len=139 tot-seq=1

CCTTGTCAGTTTCCAGGTGGCCTTTGTCCCAAGATGGGGCAGGTTCCAGTGGGGAGGTG  
TGTGTGTGGGAGGCTGATACAGGAAGATTCCAGAAAGGAGGCCCTCAGGTTGCTGTGGTG  
GGGAGTGGGGAGTGGGGAT

>6290 len=139 tot-seq=1

TGGGGAATATTGGACAATGGGCCGAGAGTCTGATCCAGCAATTATGTGTGCACGATGAAG  
TTTTTCGGAATGTAGAGTGCTTTCAGTTGGGAAGAAAGAAATGACGGTACCAACAGAAGA  
AGTGACGGCTAAATACGTG

>6291 len=139 tot-seq=1

CGCAAGCCTGATCCAGCCATGCCGCGTGAGTGAAGAAGGCCTTCGGGTTGTAAAGCTCTT  
TCAGACGGAAAGAAATCTCCAGGATAATACCTTGGGAGGATGACGGTACCGTAAGAAGA  
AGCACCGGCTAACTACGTG

>6292 len=139 tot-seq=1

TGGGGAATATTGGACAATGGACCAAAAAGTCTGATCCAGCAATTCTGTGTGTTTGATGAAG  
GCCTTCGGGTTGTAAAGAACTTTAAGTAGGGAAGAAGAAAGTGACGGTACCTACAGAATA  
AGCGACGGCTAAATACGTG

>6293 len=139 tot-seq=1

TGGCTGTGAGGAAGCAGAGAAAATTAATTTGGTAGAGACAGCATTAGAGAGTGCCCTCCA  
AGAAGAAGGGTCTTGAGGAGGAAAAGAAATAGCCAGCAGCCGCGGTATGTAGAGATCGGA  
AGAGCGTCGTGTAGGGAAG

>6294 len=139 tot-seq=1

GAAGCATAGAGTGTGAGGGCCTCGGTCCTCATTAAAGGTCCAGATGAAATTGATCATCCGG  
CACCATGCCAGGATTTCTCCTAGGTTCTGCTGAGGCAGAAGCAAAGGAAAATAAAATAG

GATGTCATGTTCCCCAGCC

>6295 len=139 tot-seq=1

TGGGGAATCTTGCGCAATGGGGGAAACCTGACGCAGCGACGCCGCGTGCGGGATGAAGG  
CCTTCGGGTAAACCGCTTTCAGCAGGGACGAGGCCGCAAGGTGACGGTACCTGCAGAAGA  
AGCTCCGGCTAAATACGTG

>6296 len=139 tot-seq=1

CGCAAGCCTGATGGAGCAACACCGCGTGAGTGAAGAAGGGTTTCGGCTCGTAAAGCTCTG  
TTGTTAGAGAAGAACGTGAGTGATAGTAACTGTTACGCAGTGACGGTAACCACCCAGAA  
AGTCACGGCTAACTACGTG

>6297 len=139 tot-seq=1

CGCAAGTCTGATGGAGCAACGCCGCGTGAGTGAAGAAGGGTTTTCGGATCGTAAAGCACTG  
TTGTTGAAGAAGAAGGATAGAGGTAGTAACTGGCCTTTAATTGACGGTAATCAACCAGAA  
AGTCACGGCTAACTACGTG

>6298 len=139 tot-seq=1

CCCCTGGAGGCCCGTGCAGGCCTCTGAGACCACCAGCTCAGGGAGGGCTTCCCTCCAGGC  
AGGGCACACCGTGCACCTGCGGCATCCGGCAGGGCCAGCCCAAGGACAAATGGCGCCCCC  
TTACCCACCGGTGACTTAC

>6299 len=139 tot-seq=1

CGTGTGGGGAATATTGCACAATGGGCGAAAGCCGGATGCAGCGACGCCGCGTGAGCGAAG  
AAGTATTTGGTAGGTAAAGCTCCATAAGAAGGGAAGAAAATGACGGTACCTTACTAAGA  
AGCTCCGGCTAAATACGTG

>6300 len=139 tot-seq=1

CGCAAGTCTGATGGAGCAACGCCGCGTGAGTGAAGAAGGGTTTCGGCTCGTAAAGCTCTG  
TTGTTGTTGAAGAATGACAGGTGGAGTAACGGACCTTTGTTTGACGGTAATCAATTAGAA  
AGTCACGGCTAACTACGTG

>6301 len=139 tot-seq=1

CGAAAGCCTGATGGAGCAACGCCGCGTGGGTGAAGAAGGGTTTCGGCTCGTAAAGCTCTG  
TTGGTAGTGAAGAAAGATAGAGGTAGTAGCTGGCCTTTATTTGACGGTAATTACTTAGAA  
AGGCACGGCTAACTACGTG

>6302 len=139 tot-seq=1

GGGGAATATTGCACAATGGGCGCAAGCCTGATGCAGCGACGCCGCGTGGGGGATGACGGC  
CTGCGGGTTGTAAACTCATTTTCGCAACCGACGAAGCTTTTGTGACGGTAGGTTGAGAAGA  
AGCACCGGCTAACTACGTG

>6303 len=139 tot-seq=1

TAGGGAATCTTGACAATGGGCGCAAGCCTGATCCAGCAATATTGCGTGAGTGAAGAAGG  
GCAATTCGCTCGTAAAGCTCTTTTCGTCGAGTGC GCGATCATGACATGACTCGAGGAAGA  
AGCCCCGGCTAACTCCGTG

>6304 len=139 tot-seq=1

CGAAAGTCTGATGGAGCAACGCCGCGTGAGTGAAGAAGGGTTTCGGCTCGTAAAGCTCTG  
TTGGTAGGGAAGAAAGAGAGAGGGAGTAACTGGTCTGTATTTGACGGTAATTA CTGAGAA  
AGTCACGGCTAACTACGTG

>6305 len=140 tot-seq=1

GGAGCAAAGTGGAGCGCCTGGGCCGCGGTTCCGGAGCCGCGTGCGGCGACTGCGGGAGC  
TCAGCGGCAGCCTGGAGCTCGTCTTCCTGGTGGACGAGTCGTC CAGCGTGGGCCAAACCA  
ACTTCCTCAACGAGCTCAAG

>6306 len=140 tot-seq=1

CCAGACCATCTATACCTGCCTCCTCAGATGATCTGAAAAGATGTGGCGGGGTTTCAAAG  
ACAAAGGAACTGGCTTTCCAGAAGATGGAACCAGGAGAACTGGCCATACTTAGAGTGTG  
CTTGTCTGACATGGGAAATC

>6307 len=140 tot-seq=1

TGGGGAATATTGCACAATGGGCGCAAGCCTGATGCAGCCATGCCGCGTGTATGAAGAAGG  
CCTTCGGATTGTAAACCCCTGTCATGTGGGAGCAAATTA AAAAGATAGTACCACAAGAGG  
AAGAGACGGCTAACTCTGTG

>6308 len=140 tot-seq=1

TCCATCTACACAGGCATCCCTCAGACTCACCAGTGTGTCCTTGTTGCTGTAATGGACCAC  
CCAGCCCTCCCGCAGGGTGGTGTGATTTCCGGGTCGTGTGTAGCACAGACTGTACCAC  
GCGCAGCAGGGGGATGTATC

>6309 len=140 tot-seq=1

TGGGGAATATTGGACAATGGGCGAAAGCCTGATCCAGCCATGCCGCGTGTGTGAAGAAGG  
TCTTAGGATTGTAAACCCCTGTCATGTGGGAGCAAATTAAGATAGTACCACAAGAGG  
AAGAGACGGCTAACTCTGTG

>6310 len=140 tot-seq=1

GACACAGGCAGTGTCTCTAGATGAGGCCCTCTCCTCCCTTGCTCATAGCTAAGGCCCA  
GCTGAAGCTACCACCAATTTGACTAGAGCCAGGGCTGGCCTTTTCCCTACCATCCTGTGT  
CCTTGAGGGCAAGTCTGGTG

>6311 len=140 tot-seq=1

AGAGACCTGTCCATGTTCACTACACATTCCACAATGCGCTACGGCCCCAGTCCAGCAACC  
CAACAGCTTGCTTCTCCTAGCTGTTTGCTTATCTGGTTTACAACAGAGAAGGGTGGGTC  
TGTGGCCTCCAGAACAGGGC

>6312 len=140 tot-seq=1

CAAACACACACACACACAGTGGATCAGTGTAGAGTGCTCATTATTGTCTTCTTTGGC  
CTGGAAAGCCAGGGAGTGGCTGAGGTGTGTGACTCAATCGCATCACCTGTTATTCTAACT  
CTTCTTCTTCTGTTCCAA

>6313 len=140 tot-seq=1

CAAAAAGGGACTGCAGGCGGAGAGCAATAGTGTTCCTCTGTCAGCAGAACAGGGGAG  
CAGGGTGGTGGCAGCGGCTGCTCAGGAGAGCGGTACCACGGCTGCCTTTATTACCCACC  
ATCAAACAGCAATTTCTTCC

>6314 len=140 tot-seq=1

TGGGGAATATTGCACAATGGGCGCAAGCCTGATGCAGCCATGCCGCGTGGATGAAGGCCT  
TCGGGTTGTAAACCGCTTTTGATTGGGAGCAAGCCTTTGGGTGAGTGTACCTTTCGAAT  
AAGCGCCGGCTAACTACGTG

>6315 len=140 tot-seq=1

TGGGGAATATTGGACAATGGGCGGAAGCCTGATCCAGCAACGCCGCGTGAGGGATGACGG  
CCTTCGGGTTGTGAACCTCTTTCAGCACAGACGAAGCGAAAGTGACGGTATGTGCAGAAG  
GAGGACCGGCCAACTACGTG

>6316 len=140 tot-seq=1

TGGGGAATATTGCACAATGGGCGGAAGCCTGATGCAGCAACGCCGCGCGGGATGACGG

CCTTCGGGTTGTAAACCGCTTTCAGCAGGGAAGAAGCGCAAGTGACGGTACCTGCAGAAG  
AAGTACCGGCTAACTACGTG

>6317 len=140 tot-seq=1

TAGGGAATCTCCGCAATGGGCGAAAGCCTGACGCAGCGACGCAGCGTGCGGGATGACGG  
CCTTCGGGTTGTAAACCGCTTTCAGCAGGGAAGAAGCGCAAGTGACGGTACCTGCAGAAG  
AAGTACCGGCTAACTACGTG

>6318 len=140 tot-seq=1

TGGGGAATATTGGACAATGGGCGAAAGCCTGATCCAGCAACGCCGCGTGAGGGATGACGG  
CCTTCGGGTTGTAAACCTCTTTCAGCGCAGACGAAGCGAAAGTGACGGTATGCGCAGAAG  
AAGCACCGGCCAACTACGTG

>6319 len=140 tot-seq=1

TGGGGAATATTGCACAATGGGCGAAAGCCTGATACAGCGACGCCGCGTGCGGGATGACGG  
CCTTCGGGTTGTAAACCGCTTTCAGCTCTGACGAAGCTTTTGTGACGGTAGGAGCAGAAG  
GAGCACCGGCTAACTACGTG

>6320 len=140 tot-seq=1

TAGGGAATCTCCACAATGGGCGCAAGCCTGATGCAGCAACGCCGCGTGCGGGATGACGG  
CCTTCGGGTTGTAAACCGCTTTCAGTAGGGACGAAGCTAACGTGACGGTACCTACAGAAG  
AAGGACCGGCTAACTACGTG

>6321 len=140 tot-seq=1

TGGGGAATCTCCGCAATGGACGAAAGTCTGACGGAGCAACGCCGCGTGAGTGAAGACGG  
CCTTCGGGTTGTAAACCTCTTTCAGCAGGGACGAAGCGCAAGTGACGGTACCTGCAGAAG  
AAGCACCGGCTAACTACGTG

>6322 len=140 tot-seq=1

CGCAAGTCTGATGGAGCAACGCCGCGTGAGTGAAGAAGGGTTTCGGCTCGTAAAGCTCTG  
TTAATCGGGACGAATGGTCCTTGTGTGAATAATGCAAGGATTTGACGGTACCGGAATAGA  
AAGCCACGGCTAACTACGTG

>6323 len=140 tot-seq=1

TGGGGAATCTTGACAATGGGCGAAAGCCTGATGCAGCGACGCCACGTGCGGGAAGAAGG  
CCCTCGGGTCGTAAACCGCTTTCAGCAGGGACGAGGCCGAAAGGTGACGGTACCTGCAGA

AGAAGCCCCGGCTAACTACG

>6324 len=140 tot-seq=1

TGGGGAATATTGCGCAATGGGGGAAACCCTGACGCAGCGACGCCGCGTGAGGGATGACGG  
CCTTCGGGTTGTAAACCTCTGTTAGCATCGAAGAAGCGAAAGTGACGGTAGGTGCAGAGA  
AAGCGCCGGCTAACTACGTG

>6325 len=140 tot-seq=1

TGGGGAATTTTGGACAATGGGCGCAAGCCTGATCCAGCAATGCCGCGTGCGGGAAGAAGG  
CCTTCGGGTTGTAAACCGCTTTCGCTGTGACGAAGCGTGAGTGACGGTAATGGGTAAAG  
AAGCACCGGCTAACTACGTG

>6326 len=140 tot-seq=1

TGGGGAATATTGCACAATGGGCGCAAGCCTGATGCAGCGACGCCGCGTGGGGGATGACGG  
CCTTCGGGTTGTAAACCTCTTTCAGTACCGACGAAGCGTAAGTGACGGTAGGTACAGAAG  
AAGCACCGGCCAACTACGTG

>6327 len=140 tot-seq=1

TGGGGAATATTGCACAATGGGGGAAACCCTGATGCAGCGACGCCGCGTGAGGAAGAAGG  
TCTTCGATTAGAAAACCCTGTAGTCCTTCAAGATCGGAAGAGCGTCGTGTAGGGAAAGA  
GTATGCCAATGTGTAGATCT

>6328 len=140 tot-seq=1

CGGAAGTCTGACCGAGCAACGCCGCGTGAGGGAAGAAGGGTTTCGGATCGTAAAGCTCTG  
TTGTTAGAGAAGAACGGTGGTAGGAGTGGAATCGACCAAGTGACGGTAACGAACCAGA  
AAGGGACGGCTAACTACGTG

>6329 len=140 tot-seq=1

TGGGGAATCTTGCACAATGGGCGAAAGCCTGATGCAGCGACGCCGCGTGCGGGATGAAGG  
CCTTCGGGTTGTAAACCTCTTTCAGTACCGACGAAGCGCAAGTGACGGTAGGTACAGAAG  
AAGCACCGGCCAACTACGTG

>6330 len=140 tot-seq=1

TGGGGAATATTGCACAATGGGCGCAAGCCTGATGCAGCAACGCCGCGTGAGTGAAGAAGT  
ATTCGGTATGTAAAGCTCTATCGGCAGGGAAGAAAGGCCCTTAACAGGGAGATGACGGT  
ACCTGACTAAGAAGCCCCGG



>6331 len=140 tot-seq=1

TGGGGAATATTGGGCAATGGAGGAACTCTGACCCAGCGACGCCGCGTGAGGGATGAAGG  
CCTTCGGGTTGTAAACCTCTTTCAGCAGGGAATAAGCGAAAGTGAAGGTACCTGCAGAAG  
AAGCACCGGCTAACTATGTG

>6332 len=140 tot-seq=1

TGGGGAATCTCCGCAATGGACGAAAGTCTGACGGAGCAACGCCGCGTGAGTGAAGACGG  
CCTTCGGGTTGTAAACCGCTTTCGCTGTGACGAAGCGTGAGTGACGGTAATGGGTAAAG  
AAGCACCGGCTAACTACGTG

>6333 len=140 tot-seq=1

TGGGGAATATTGGACAATGGAGGTAACCTCTGATCCAGCAATTCTGTGTGTGTGAAGAA  
GGTTTTAGGACTGTAAAACACTTTTAGTAGGGAAGAAAAAAGTGACGGCACCTACAGAAG  
AAGCAACGGCTAAATACGTG

>6334 len=140 tot-seq=1

CTCAACTCCCCATACCACTCTGTGCTTTTCCCCTGGCCCTCTGCCACTAAGACTGCAT  
GTA ACTAAGTTTCTCCAGGATGCGTCCCCTAGATCAGAGAACCAGGAATTGGCAA CTAC  
AGCCTGCAAATCAAATCCAG

>6335 len=140 tot-seq=1

TGAGGAATATTGGTCAATGGGCGCTAGCCTGAACCAGCCAAGTAGCGTGAGGGATGACGG  
CCTTCGGGTTGTAAACCTCTTTCAGCAGGGACGAAGCGCAAGTGACGGTACCTGCAGAAG  
AAGCACCGGCTAACTACGTG

>6336 len=140 tot-seq=1

TGGGGAATATTGCGCAATGGTAAACCCTGACGCAGCGACGCCGCGTGCGGGATGAAGGCC  
TTCGGGTTATAAACCGCTTTTGATTGGGAGCAAGCCTTCGGGTGAGTGTACCTTTCGAAT  
AAGCGCCGGCTAACTACGTG

>6337 len=140 tot-seq=1

GACAAAACCTCAGTCAGCTTGGTGGTGACACAAGCCAGGTCCTTAGGAGGGTCACCA GTT  
TG TAGCTGCCTTGAGAAACATGGTCTTGCTGCACTGGGCTCAGTGGAGGCGAGCGGTTTG  
TGCACTGTTATCCAGACAGG

>6338 len=140 tot-seq=1

TGGGGAATATTGCACAATGGGCGCAAGCCTGATGCAGCGACGCCGCGTGGGGGATGACGG  
CCTTCGGGTTGTAAACCTCTTTCAGCGCCGACGAAGCGAAAGTGACGGTAGGCGCAGAAG  
AAGCACCGGCCAACTACGTG

>6339 len=140 tot-seq=1

TGGGGAATATTGCGCAATGGGCGGAAGCCTGACGCAGCGACGCCGCGTGGGGGATGACGG  
CCTTTGGGTTGTAAACCTCTTTCGGCCCCGACGAAGCGTGAGTGACGGTAGGGGTAGAAG  
AAGCACCGGCCAACTACGTG

>6340 len=140 tot-seq=1

TAGGGAATCTCCACAATGGGCGAAAGCCTGATGGAGCAACGCCGCGTGGGTGAAGAAGG  
TCTTCGGATTGTAAACCCCTGTCATGTGGGAGCAAATTAAGAGATAGTACCACAAGAGG  
AAGAGACGGCTAACTCTGTG

>6341 len=140 tot-seq=1

TGGGGAATATTGCACAATGGGCGCAAGCCTGATGCAGCGACGCCGCGTGAGGGATGGAGG  
CCTTCGGGTTGTAAACCTCTTTTATCGGGGAGCAAGCGAGAGTGAGTTTACCTGCAGAAG  
AAGCCCCGGCTAACTACGTG

>6342 len=140 tot-seq=1

TGGGGAATCTTCGCAATGGACGAAAGTCTGACGGAGCGACGCCGCGTGAGGGATGGAGG  
CCTTCGGGTTGTAAACCTCTTTTATCGGGGAGCAGGCGAGAGTGAGTTTACCCGTTGAAT  
AAGCACCGGCTAACTACGTG

>6343 len=140 tot-seq=1

TAGGGAATCTTCGCAATGGGCGAAAGCCTGACCGAGCAACGCCGCGTGAATGAAGAAGG  
CCTTCGGGTTGTAAACCCCTGTCATGTGGGAGCAAATTAAGAGATAGTACCACAAGAGG  
AAGAGACGGCTAACTCTGTG

>6344 len=140 tot-seq=1

TGAGGAATATTGGTCAATGGGCGCAAGCCTGATGCAGCGACGCCGCGTGAGGGATGGAGG  
CCTTCGGGTTGTAAACCTCTTTTATCGGGGAGCAAGCGTGAGTGAGTTTACCCGTTGAAT  
AAGGACCGGCTAATCCGTG

>6345 len=140 tot-seq=1

TGAGGAATATTGGTCAATGGGCGAGAGCCTGATGCAGCGACGCCGCGTGAGGGATGGAGG

CCTTCGGGTTGTAAACCTCTTTTATCGGGGAGCAAGCGAGAGTGAGTTTACCCGTTGAAT  
AAGCACCGGCTAACTACGTG

>6346 len=140 tot-seq=1

AAGGGGAGAGAGAAGGAAAAAGACCAGGAGCGGGCAGGAGGACGGCCCCGAGGGGGTGTA  
ACTGCTTTTATATGGGAATAAAGTGAGGGACGTGTCCCTTATTGCATGTACCATACGAAG  
AAGGACCGGCTAATCCGTG

>6347 len=140 tot-seq=1

GGGGATATTGCGCAATGGGGGAAACCCTGACGCAGCGACGCCGCGTGCGGGATGAAGGCC  
TTCGGGTTGTGAGCCGCGTTTGATTGGGAGCAAGCCTTCGGGTGAGTGTACCTTTCGAAT  
AAGCGCCGGCTAACTACGTG

>6348 len=140 tot-seq=1

CGGGGAATCTTGACAATGGGCGAAAGCCTGATGCAGCGACGCCGCGTGCGGGATGAAGG  
CCTTCGGGTTGTAAACCGCTTTCAGCAGGGACGAAGCGCAAGTGACGGTACCTGCAGAAG  
AAGCACCGGCTAACTACGTG

>6349 len=140 tot-seq=1

TGGGGAATCTTCGCAATGGGCGCAAGCCTGACGGAGCAACGCCGCGTGAGGGATGGAGG  
CCTTCGGGTTGTAAACCTCTTTTATCGGGGAGCAAGCGAGAGTGAGTTTACCCGTTGAAT  
AAGCACCGGCTAACTACGTG

>6350 len=140 tot-seq=1

TGGGGAATTTTGCACAATGGGGGAAACCCTGATGCAGCGACGCCGCGTGAGGGATGGAGG  
CCTTCGGGTTGTAAACCCCTTTTATCGGGGAGCAAGCGAGAGTGAGTTTACCCGTTGAAT  
AAGCACCGGCTAACTACGTG

>6351 len=140 tot-seq=1

GGAGTTGGAGATAAAGGACACAGGGCTCCTGCCCTCAGCATGTGCACTGTTTCATGGTGCT  
GGAGAGCAGGTGGGGATGAGGCTCCCTCTCTTGGATCTGTGAATGCAGCATCCCATGCAT  
GACTGAGTCCTACAGAAAGT

>6352 len=140 tot-seq=1

TGGGGAATTTTGCACAATGGGGGAAACCCTGATGCAGCAACGCCGCGTGCGGGATGACGG  
CCTTCGGGTTGTAAACCGCTTTCAGCAGGGACGAAGCGCAAGTGACGGTACCTGCAGAAG

AAGCACCGGCTAACTACGTG

>6353 len=140 tot-seq=1

TAGGGAATCTTCCACAATGGACGCAAGTCTGATGGAGCAACGCCGCGTGAGGGATGACGG  
CCTTCGGGTTGTAAACTCCTTTCACCATCGACGAAGGTTTTCTGACGGTAGATGGAGAAG  
AAGCACCGGCTAACTACGTG

>6354 len=140 tot-seq=1

TGGGGAATCTTCCGCAATGGGCGAAAGCCTGATGCAGCGACGCCGCGTGAGGGATGACGG  
CCTTCGGGTTGTAAACCTCCTTTCAGCAGGGACGAAGCGCAAGTGACGGTACCTACAGAAG  
AAGCAACGGCTAAATACGTG

>6355 len=140 tot-seq=1

TCTCAACGAACAGTACCGCACTCTCATCATCGTTCAAACCTGAGCCCGTTCGGAAAATAGA  
GCTCCGACAAAACAACGGTAACTTCACCGTTTGGATCACGACGCAACAGCCGTCCTGATG  
GTCTGTGCTCGATGAACGCT

>6356 len=140 tot-seq=1

ACGCAAGTCTGATGGAACAACGCCACGTGAGTGAAGAAGGTTTTCGGATCGTAAAGCTCT  
GTTGTTGGTTAAGAAGGATAGAGGTAGTAACTGGCCTTTATTTGGCGGTAATCAACCAGA  
AAGTCACGGCTAACTACGTG

>6357 len=140 tot-seq=1

TGGGGAATATCGCACAATGGACGGAAGTTTGATGCAGCGACGCCGCGTGAGGGATGACGG  
CCTTCGGGTTGTAAACCTCCTTTCAGCAGGGACGAAGCGCAAGTGACGGTACCTGCAGAAG  
AAGCACCGGCTAACTACGTG

>6358 len=140 tot-seq=1

TGGGGAATATTGGACAATGGGCGAAAGCCTGATCCAGCAACGCCGCGTGAGGGATGAATG  
CCTTCGGGTTGTAAACCTCCTTTCGCCTGCGACGAAGCGAGAGTGACGGTAGCAGGTAAG  
AAGCACCGGCCAACTACGTG

>6359 len=140 tot-seq=1

GGGTAGGGGGAGCAGAGCAACTGTGCGACTCCAGGAGATGGGATGTGGGCTCAGTGGAGG  
CCGTTGCAGGGGACCAGGTAGGCATCTGGACCTTCTGGCTAGGCCAGCTTCAAGCTCGAG  
TTGCGGGGAGGCCTCTCCTA

>6360 len=140 tot-seq=1

CCCCAGACCCAGGGGGCCTGGAGCCACATCCTCCCCACCAGCCAGCAGCTTGGCATCAGG  
TCCATGGGATCTGTGAACAAGAAAAGGAGAGGGGATAGGCTGGGAGGATAGAACTCCCAG  
GAGCCTGAGGAAGGCGATCC

>6361 len=140 tot-seq=1

TGAATCAATCTCAGTGGGAGGTTTCATAGTGAGAGGGAAGATGGAACACCTGAAACCAAAG  
GGGAAAAACAACTGCAAATACATATATATTTTCTTTGCTAACATTACTTGGTAATTAG  
ACAATTACAGGAAACAGCTT

>6362 len=140 tot-seq=1

TGGGGAATATTGCACAATGGGCGCAAGCCTGATGCAGCGACGCCCGTGGGGGATGAAGG  
CCTTCGGGTTGTAAACTCCTTCAGCCATGACGAAGCGTAAGTGACGGTAGTGGTAGAAG  
AAGCACCGGCTAACTACGTG

>6363 len=140 tot-seq=1

GCCCCTTGTGGCCTCACCTGTTCCACCGCGCCCCTTGCCACAGCTTCACCCTCCCCA  
GAGCTGGTCCGGTACTCTACGCTCAACTCTGAGCACTTCCCACAGCCCACACAGCAGATC  
AAGAATATTGTCAGGCAGTA

>6364 len=140 tot-seq=1

TGGGGAATATTGCGCAATGGGGGAAACCCTGACGCAGCAACGCCCGTGAGGGACGACGG  
CCTTCAGGTTGTAAACCTCTTTTAGCAAGGAAGAAGCGAAAGTGACGGTACTTGCAGAAA  
AAGCGCCGGCTAACTACGTG

>6365 len=140 tot-seq=1

TAGGGAATCTTCCACAATGGACGCAAGTCTGATGGAGCAACGCCCGTGGGGGATGAAGG  
CCTTCGGGTTGTAAACTCCTTCGCTAGGGACGAAGCGCAAGTGACGGTACCTGGAGAAG  
AAGCACCGGCTAACTACGTG

>6366 len=140 tot-seq=1

TGGGGAATATTGCGCAATGGGGGAAACCCTGACGCAGCCATGCCCGTGAGGGATGACGG  
CCTTCGGGTTGTAAACCTCTTCAGCAGGGACGAAGCGCAAGTGACGGTACCTGCAGAAG  
AAGCACCGGCTAACTACGTG

>6367 len=140 tot-seq=1

CGGCATACGAGATCGGTGTGTGACTGGAGTGCAGACGTGTGCTCTCCGATTCCCTACGGG  
AGGCAGCGGTAGGCCTTTCTAACAAACAAGCACGTACACCCCCTGAGTCTGTAAAATACC  
AAAACAATGACGACAGCACC

>6368 len=140 tot-seq=1

CCCTCACCTTGGCCCGAGCAGCAGCCCTGGTCTCGGCGTCCATCCAGTCCAGCTCCTCCA  
GGCGCTGGCCAGGGTGTACTTGATGTCTTCCACTAGCTGCTGCACCTGCAGGGTCAGGG  
GTCAGGGAGCAAGGGTCAAC

>6369 len=140 tot-seq=1

TGAGGAATATTGGTCAATGGACGAAAGCCTGATGCAGCGACGCCGCGTGAGGGATGACGG  
CCTTCGGGTTGTAAACCTCTTTTCAGTAGGGACGAAGCGCAAGTACCGGTACCTGCAGAAG  
AAGCACCGGCTAACTACGTG

>6370 len=140 tot-seq=1

CATGCGTGGCGCTGAGGATGCCCTGAGAGACCAGTGGAGAAGCAGGGGTGCGGCCTGGAG  
TTCCCATCACCTCACAATACCTTCTGCTCGTACTGCTGCTTCATGGACCGGAAATGCTG  
GTCCCATTGCTTGTTCACTT

>6371 len=141 tot-seq=1

TGGGGAATAGGGCACAATGGGGGGAAGCCTGATGCAGACATGCCGCGAGTATGAAGAAGG  
CCTTCGGGTGGTAAAGTACTTTTCAGCGGGGAGGAAGGGAGTAAAGTTAATACCTTTGCTC  
ATTGACGTTACCCGCAGAAGA

>6372 len=141 tot-seq=1

TGGGGAATATTGCACAATGGGCGGAAGCCTGATGCAGCAACGCCGCGTGCGGGATGACGG  
CCTTCGGGTTGTAAACCGCTTTTACCATCGACGAAGCTTTTTGTGACGGTAGGTGGAGAA  
GAAGCACCGGCTAACTACGTG

>6373 len=141 tot-seq=1

TAGGGAATCTTCGGCAATGGACGGAAGTCTGACCGAGCAACGCCGCGTGGGGGATGACGG  
CCTTCGGGTTGTAAACTCCTTTTCGCTAGGGACGAAGCTTTTTGTGACGGTACCTAGATAA  
GAAGCACCGGCTAACTACGTG

>6374 len=141 tot-seq=1

GGCCGTATCCCTCTGAAGGCGCCAGAGAAGGGTCCATCTTTGCCCTCCAGCTTCCGGC

GGTCACCAGCAGGCCTTAGCGTTTGCTGGCGCAGCTGCATGGCTCTGATCTCTGCCTCTG  
TCTTCACAGGGATTTCTTCCC

>6375 len=141 tot-seq=1

TGGGGAACCTTCCGCAATGGGCGCAAGCCTGACGGAGCAATGCCGCGTGAGTGAAGAAGG  
CCTTCGGGTTGTAAACCGCTTTTGATTGGGAGCAAGCTTTCGGGTGAGTGTACCTTTCGA  
ATAAGCGCCGGCTAACTACGT

>6376 len=141 tot-seq=1

CGGAAAGGGGGACGCAGAGAAAGGCAGCCTCGGCGCACCGCGGCCAGGGAGGCAGAGGCC  
CCTCGCGGCGCCGGCTCTGGAGACCTAACTCCGCCGGGGCTGTGCCAGGGCGCGTCTG  
AGCGTCGCCGCCTTACCCTC

>6377 len=141 tot-seq=1

TGGGGAATATTGCACAATGGGCGCAAGCCTGATGCAGCGACGCCGCGTGGGGGATGACGG  
CCTTCGGGTTGTAACTCCTTTGCAACCGACGAAGCCCTTGTGGTGACGGTAGGTTGAG  
AAGAAGCACCGGCTAACTAGG

>6378 len=141 tot-seq=1

GACGAAAGTCTGATGGAGCAACGCCGCGTGAGTGAAGAAGTTTTTCGGATCGTAAAGCTC  
TGTTGTTGGTGAAGGGGAGGGGAGGTAGTAACAGGCCTTTATTTGACGGTAATCAACCAG  
AAAGTCACGGCTAACTACGTG

>6379 len=141 tot-seq=1

GAGATGGGGAAGGTATCCAGGGCCCCCTCAGCCGCTGCCCCGCTTGGGCAGATCCCCGAT  
GCTTTTCTGCACAGCCATTTTGCATTCCTGCCTGCATTAGTAGATAAAACAAAGAAAGAG  
CAGGTCCCTGGCATGCAGAGC

>6380 len=141 tot-seq=1

TGAGGAATATTGGTCAATGGTCGGGAGACTGAACCAGCCAAGCCGCGTGAGGGAATGAAG  
GTCTTCGGATTGTAAACCCCTGTCATGTGGGAGCAAATTA AAAAGATAGTACCACAAGAG  
GAAGAGACGGCTAACTCTGTG

>6381 len=141 tot-seq=1

GAGACAAGCTCAGGAGCTTGAATGCCAGACCAGAGTACTTGGGCCACAGTCTGGAGACAG  
TGGGAGACTGGGGAAGGTATGGCGGGGGCGCTGCACAAGGTCACATAGAAGCCAAAGCTT

GGGGAGAAAGAGCTGCCATCC

>6382 len=141 tot-seq=1

TCTGAGCTGCGCTAAAAGGATAATTAATTGGAACGAAAACACCAGCTCCAGCTCCTCTGA

TCTGTTCTCTCAGAGAATTCACAGTTGTCTTCTCCAAGCCCCTCCCCCTCCCAGACT

CCAGGCTAATTCCTTCAGATG

>6383 len=141 tot-seq=1

TGAGGAATATTGGTCAATGGGAGAGATCCTGAACCAGCCAAGCCGCGTGGGGGAATGAAG

GTCTTCGGATTGTAAACCCTGTCATGTGGGAGCAAATTA AAAAGATAGTACCACAAGAG

GAAGAGACGGCTAACTCTGTG

>6384 len=141 tot-seq=1

TGGGGAATATTGCGCAATGGGGAAACCCTGACGCAGCGACGCCGCGTGC GGGATGAGGGC

CTTCGGGTTGTAGACCGCTTTTGATTGGGAGCAAGCCCTCGGGTGAGTGTACCTTT CGAA

TAAGCGCCGGCTAACTACGTG

>6385 len=141 tot-seq=1

TGAGGAATTTTTACAATGGACGAAAGTCTGATGGAGCAACGCCGCGTGGGGGATGACGG

CCTTCGGGTTGTAAACTCCTTCGACAGGGACGAAGCTTTTTGTGACGGTACCTGTATAA

GAAGCACCGGCTAACTACGTG

>6386 len=141 tot-seq=1

TGCCTTTGGCTGGGAGGAGGGATGGGGCATTACAGGAGCAGGCCGGGGTGGACAGCGCC

CAATGCCACAAGTACAGTGGGTGGGCACCAGCAAAGTCCTCTTCCAATGCCTTCAGCTTC

TCAGGGAAGGAGGGTGCAAGG

>6387 len=141 tot-seq=1

GCGAAAGCCTGACGGAGCAACGCCGCGTGAGTGAAGACGGCCTTCGGGTTGTAAAGCTCT

GTGATTCGGGACGAAAGATAAGCAGACAAATAATCTGCATAAGAGACGGTACCGAAAAAG

CAAGCCACGGCTAACTACGTG

>6388 len=141 tot-seq=1

GAGGGTTCTACGTAAAACGTCCGGTCCAGAGTTCAAACCCCAAATAATAGTTTTGGATTT

CCCCAAGTACTACCACTTAATATGTCACCAGGAAAGACCCATCACACACATATATGGAA

GGAAAAATTAAGTTTCTCT



>6389 len=141 tot-seq=1

CAAAAATATACCAGGACCATGCTAGGAGTTCACTCTCCCTGTCAGGATAGGTAGGACCAA  
AGAAATAACTCTCAGTTAGCTTTTAGACCATTTCCAGAAATATCAGTGACATGGCATCAT  
CAACTTTTACTTCACTTCACC

>6390 len=141 tot-seq=1

CTGGAACACAAGTCTCCCCACTGAGAACTTGACCCCTCATTCTCAACCCCAGTCTCAGA  
GCAATACTGAGGTAGTGCCTATGGGTCCAGGCAGACTCATGGAGGCAGAGGCCAAGGCCA  
CACCCAGTCAGTAATAATCAC

>6391 len=141 tot-seq=1

GAACCTGAGGCTGAGCTGGCTCCTAGCCAGGACCCTCCGAGCTGCTGCCCTGCAGACCA  
CGGCCTGCCGAAGCACCCCTTCAGCCCAGTGCAGCCACAGCCGGCCTGGTGCACATCCTG  
CCCCGGTTTTTTTTTTTTTAA

>6392 len=141 tot-seq=1

TGCAGTGAGCCGAGATCGCGCCACTGCACTCCAGCCTGGGCGACAGAGCAAGACTCCGTC  
TCAAAAACAAAAACAAAAACAAAAACCACTTTAAGGAACTGCCGAACTGCTTTCCAAG  
TGGTTGCACCATTTACATTC

>6393 len=141 tot-seq=1

TGCGGGTAGCGGTCTAGGAACTAGGCATGGGGCAGGCCACGTCACACTGCACTGAGGGA  
GGGCCCCGTCTGTGAGGCAGGCTCCTGAATCCACACCTCCACCACTTCAGAGGCCTCATT  
TCCTCAGTCCTCACAGTAACC

>6394 len=141 tot-seq=1

TGGGGAATATTGCACAATGGGCGCAAGCCTGATGCAGCGACGCCGCGTGGGGGATGACGG  
CCTTCGGGTTGTAACTCCTTCGCCAGGGACGAAGCGTTTTGTGACGGTACCTAACCAG  
AAAGTCACGGCTAACTACGTG

>6395 len=141 tot-seq=1

TGGGGAATATTGCGCAATGGGGGAAACCCTGACGCAGCGACGCGGGGGGCTGGATGAAGG  
CCTTCGGGTTGTAAACCGCTTTTGATTGGGAGCAAGCCTTCGGGTGAGTGTACCTTTCA  
ATAAGCGCCGGCTAACTCCGT

>6396 len=141 tot-seq=1

CCGCCACATCGGCGGCGGCCACGGACAGCTTCCCGTCCGCCACCTCATGGATAGCCAGGG  
TCACAGGTTTGACATCCAGCTTCTCCCCATATCCTCTGCCTCCTGGGCGATCTGGCGGG  
CCCGGCGGGCCACCACATTCA

>6397 len=141 tot-seq=1

TTTTTTTTTTCAAGCAGAAGACGGCATAACGAGATCGGTGTGTGACTGGAGTTCAGACGTG  
TGCTTTTCCGATCTCCTACGGGAGGCAGTAGCCAGCCTGAGAAGGGAGGGAGTGTCTAC  
TCTCCTGGAAAAGAGCTGAGG

>6398 len=142 tot-seq=1

TTTTTTTTTTCAAGCAGAAGACGGCATAACGAGATAAGGCCGTGACTGGAGTTCAGACGTG  
TGCTCTGATCTCCTACGGAGGCAGCAGGAGGCTTTGCTGATCAACTTCCCGCCAAGT  
AACAGAGAAAGGAGGCCAGAG

>6399 len=142 tot-seq=1

CTGGTTGGCGAAGGCCAAAGACCAAGTCGGTGAGGGGGCCAAAGCCAGCGTTGTGCATCTG  
AGTCCGGTTCAGGGTCAGTCCATCTGAGAAGGTCATTGTGTCTTGCTCAGGCGGTACCG  
CGTGCAGATTCGCAGAATCTGG

>6400 len=142 tot-seq=1

CAGCTACCTAGCTAGTTCCAGGCTACCTGGTCTATGTGAGATCCTGTCTCACAAAAACA  
AGAACAAACAAATAAACAAAAAACCTATATGTATACACCTATATGTATATGTATATGTAT  
ATGTATATGTATATGTATATGT

>6401 len=142 tot-seq=1

ATGCATAAACTCAACAATGCCTTCCAGGCACTGCGCGAGGTCATCCCGCACGTGCGGGCT  
GACAAGAAGCTCTCCAAGATCGAGACCCTCACGCTGGCCAAGAACTATATCAAGTCGCTG  
ACCGCCACCATACTTACTATGT

>6402 len=142 tot-seq=1

TGGGGAATATTGCACGATGGGCGCAAGCCTGATGCAGCAACGCCGCGTGCGGGATGAAGG  
CCTTCGGGTTGTAAACCGCTTTCAGCAGGGACGAGGCCGCAAGGTGACGGTACCTGCAGA  
AGAAGCCCCGGCTAACTACGTG

>6403 len=142 tot-seq=1

TGGGGAATTTTGGACAATGGGCGAAAGCCTGATCCAGCAATGCCGCGTGTGTGAAGAAGG

CCTTTGGGTTGTAAGCCGCTTTTGATTGGGAGCAAGCTTTCGGGTGAGTGTACCTTTCGA  
ATAAGCGCCGGCTAACTACGTG

>6404 len=142 tot-seq=1

TGGGGAATATTGCGCAATGGGGGAAACCCTGACGCAGCGACGCCGCGTGCGGGATGAAGG  
CCTTCGGGTTGTAACCGCTTTCAGCAGGGACGAGGCCGCAAGGTGACGGTACCGTAAGA  
GAAAGCCACGGCTAACTACGTG

>6405 len=142 tot-seq=1

TGGGGAATATTGGACAATGGGGGCAACCCTGATCCAGCCATGCCGCGTGTGTGAAGAAGG  
CCCTCGGGTTGTAACCGCTTTTGATTGGGAGCAAGCCTTCGGGTGAGTGTACCTTTCGA  
ATAAGCGCCGGCTAACTACGTG

>6406 len=142 tot-seq=1

GGGGACTGCAGGAAACTCTGTATGGCTTTGTGCAGAATCCCTCTCTAGCATTAGTCCCA  
ACCCAGAGGAAAACAGTCTCTTGCCCCGCTGCTGGTGAAGAAGAGGAGGAGAAGAAAA  
ATGATGATGAGGAGGAGTATGA

>6407 len=142 tot-seq=1

ATCACCTGAGGTCAGGAGTTCGAGACAAAAACCAACATGGAAAAATCCCCTCTACTAA  
AAATACGAAATTAGCCAGGCGTGGTGGCACATGCCTGTAATCCCAGCTGCTCAGGAGGCT  
GATGCAAGAGAATCGCTTGAAC

>6408 len=142 tot-seq=1

GTGATGGGAGGAGAAGAGATGCAGGCAGAGAGTGAGTCCAGCAGGCTGGGCAGGAGGAGG  
GAGGCCATGCCGTGGACCGGGCCAGGTTTGTATATACAGTTGCCTCTCACTCAGTCCCT  
CACTAAGAAGCCCAGTGTGGTG

>6409 len=142 tot-seq=1

TCGGGAATTTTGACAATGGCCGAAAGGCTGATGCAGCAACGCCGCGTGGGGGAAGAAGG  
CCTTCGGGTTGTAACCGCTTTTGATTGGGAGCAAGCTTTCGGGTGAGTGTACCTTTCGA  
ATAAGCGCCGGCTAACTACGTG

>6410 len=142 tot-seq=1

TAGGGAATCTCCACAATGGACGCAACCCTGACGCAGCGACGCCGCGTGCGGGATGAGGG  
CCTTCGGGTCGTAACCGCTTTTGATTGGGAGCAAGCTTTCGGGTGAGTGTACCTTTCGA

ATAAGCGCCGGCTAACTACGTG

>6411 len=142 tot-seq=1

TAGGGAATCTTCGGCAATGGACGCAAGTCTGAACCAGCCAAGTAGCGTGCAGGATGAAGG

CCTTCGGGTTGTAAACCGCTTTTGATTGGGAGCAAGCTTTCGGGTGAGTGTACCTTTCGA

ATAAGCGCCGGCTAACTACGTG

>6412 len=142 tot-seq=1

AGCAGACCAGCACTGGTGCCACAGCTCCAATAGAGGCCACAGTCGCAGTGCCTAGGAGCA

GTAAGATTTTTTCACTTCTCTCGCCAGATGGGTCTCATTGCCAGCTTCCAGCATAGTGG

TCCTGCTTCTGCCTGAAACTGG

>6413 len=142 tot-seq=1

TGGGGGATATTGCACAATGGACGCAAGTCTGATGCAGCGACGTCGTGTGGGGGATGAAGG

CCTTCGGGTTGTAAACCGCTTTCAGCAGGGACGAGGCCGCAAGGTGACGGTACCTGCAGA

AGAAGCCCCGGCTAACTACGTG

>6414 len=142 tot-seq=1

TGGGGAATCTTCCGCAATGGACGAAAGTCTGACGGAGCAACGCCGCGTGAGTGATGACGG

CCTTCGGGTTGTAAACCGCTTTTGATCGGGAGCAAGCCTACGGGTGAGTGTACCTTTCGA

ATAAGCACCGGCTAACTACGTG

>6415 len=142 tot-seq=1

TAGGGAATTTTCGGCAATGGGGCGAAAGCCTGACCGAGCAACGCCGCGTGAGTGATGACGG

CCTTCGGGTTGTAAACCGCTTTTGATTGGGAGCAAGCTTTCGGGTGAGTGTACCTTTCGA

ATAAGCACCGGCTAACTACGTG

>6416 len=142 tot-seq=1

TAGGGAATCTTCGGCAATGGGGGCAACCCTGACCGAGCAACGCCGCGTGAGTGAAGAAGG

CCTTCGGGTTGTAAACCGCTTTTGATTGGGAGCAAGCTTTCGGGTGAGTGTACCTTTCGA

ATAAGCGCCGGCTAACTACGTG

>6417 len=142 tot-seq=1

TAGGGAATCTTCGGCAATGGGGGCAACCCTGATGCAGCGACGCCGCGTGCGGGATGAAGG

CCTTCGGGTTGTAAACCGCTTTCAGCAGGGACGAGGCCGCAAGGTGACGGTACCTGCAGA

AGAAGCCCCGGCTAACTACGTG

>6418 len=142 tot-seq=1

AGGGGAATATTGCGCAATGGAGGAAACCCTGACGCAGCGACGCCACGTGCGGGATGAAAG  
CCTTCGGGTTGTAAACCGCTTTTGATTGGGAGCAAGCCTTCGGGTGAGTGTACCTTTCGA  
ATAAGCGCCGGCTAACTACGTG

>6419 len=142 tot-seq=1

TTGACCTCACCTGGCCCTCCTCACCCCGCGCAGGTCCCTCCACGAGCTGTCCCGGGAG  
ATGGGGCGCGAGGTCTGCACGCCGGCGTGCCGCACGCCGGCCCCGTGCTGCCGGCACTTG  
CTCAGCAGCTCCTCGTACTTCT

>6420 len=142 tot-seq=1

CACTACTTGGACAAATAGATAATTCTGGGACTGGAGTGAAAAATCAAACCTTAAGGTAGAG  
TATTCTGTAAAGCTAGAAAGTTAAAAAGTGCTTTATGAACAACTGAAAGAGACATGTCAG  
AGGAAGCCAACCTGAAAGAGTT

>6421 len=142 tot-seq=1

TGGGGAATATTGCACAATGGGCGCAAGCCTGATGCAGCGACGCCCGTGCGGGATGACGG  
CTTTCGGGTTGTAAACCGCTTTTCAGCAAGGAAGAAGCTTAACTGTGACGGTACTTGCAGA  
AGAAGCGCCGGCTAACTACGTG

>6422 len=142 tot-seq=1

TGGGGAATATTGCGCAATGGGGGAAACCCTGACGCAGCGACGCCCGTGCGGGATGAAGG  
CCTTCGGGTTGTAAACCGCTTTTGATTGGGAGCAAGCCTTTTGGTGACGGTACCTGCAG  
AAGAAGCCCCGGCTAACTACGT

>6423 len=142 tot-seq=1

TGGGGAATATTGCGCAATGGGGGAAACCCTGACGCAGCGACGCCCGTGCGGGATGAAGG  
CCTTCGGGTTGTAAACCGCTTTTGATTGGGACGAGGCCGCAAGGTGACGGTACCTGCAGA  
AGAAGCCCCGGCTAACTACATG

>6424 len=142 tot-seq=1

TGGGGAATATTGCACAATGGGCGAAAGCCTGATGCAGCGACGCCCGTGGGGGATGAAGG  
CCTTCGGGTTGTAAACTCCTTCGCTAGGGACGAAGAGTTACATTGACGGTACCTGGAGA  
AGAAGCACCGGCTAACTACGTG

>6425 len=142 tot-seq=1

TGGGGAATATTGCACAATGGACGGAAGTCTGATGCAGCAACGCCGCGTGCGGGATGACGG  
CCTTCGGGTTGTAAACCGCTTTCAATTGTGACGAAGCTTTTTGTGACGGTAGCAGTAGA  
AGAAGCACCGGCTAACTACGTG

>6426 len=142 tot-seq=1

TAGGGAATCTTCCACAATGGACGAAACCCTGACGCAGCGACGCCGCGTGCGGGATGAAAG  
CCTTCGGGTTGTAAACCGCTTTTGATTGGGGGCAAGCTTTCGGGTGAGTGTACCTTTCA  
ATAAGCGCCGGCTAACTACGTG

>6427 len=142 tot-seq=1

TGGGGAATATTGCACAATGGGCGGAAGCCTGATGCAGCAACGCCGCGTGCGGGATGACGG  
CCTTCGGGTTGTAAACCGCTTTTCAGCAGGGACGAGGCCTTATGGTGACGGTACCTGCAGA  
AGAAGCTCCGGCTAAATACGTG

>6428 len=142 tot-seq=1

TGGGGAATATTGCACAATGGGCGGAAGCCTGATCCAGGAACGCCGCGTGCGGGATGACGG  
CCTTCGGGTTGTAAACCGCTTTTCGGCAGGGACGAGGCCGCAAGGTGACGGTACCTGCAGA  
AGAAGCCCCGGCTAACTACGTG

>6429 len=142 tot-seq=1

TAGGGAATCTTCGGCAATGGACGGAAGTCTGACCGAGCAACGCCGCGTGAGTGAAGAAGG  
CCTTCGGGTTGTAAACCGCTTTTCAGCAGGGACGAGGCCGCAAGGTGACGGTACCTGCAGA  
AGAAGCCCCGGCTAACTACGTG

>6430 len=142 tot-seq=1

TGGGGAATATTGCCAATGGGGGAAACCCTGACGCAGCGACGCCGCGTGCGGGATGAAGG  
CCTTCGGGTTGTAAACCGCTTTTGTTGGGGGCAAGCTTTCGGGTGAGTGTACCTTACGA  
ATAAGCGCCGGCTAACTACATG

>6431 len=142 tot-seq=1

TGGGGAATCTTGCACAATGGGCGAAAGCCTGATGCAGCGACGCCGCGTGCGGGATGAAGG  
CCTTTGGGTTGTAAACTCCTTTCAGTACAGAAGAAGCTTTATTGTGACGGTATGTGCAGA  
AGAAGCGCCGGCTAACTACGTG

>6432 len=142 tot-seq=1

CTGGTGTGGAGTTCTGGGAGCAGGTAGGCTATGGGTGAGTACTGGTAGGATCTAGACGGA

TAGGGTGAGAGTAGAGTGGGAGGGCCAGGGAGTGCCCTCAGAGCAGGAGAAAGGGCACAA  
GCAGAGGCGGTGGCAGGAACTC

>6433 len=142 tot-seq=1

TGGGGAATATTGCGCAATGGGGTAAACCATGACGCAGCGACGCCGCGTGCAGGATGAAGG  
CCTTCGGGTTGTAAACCGCTTTTGATTGAGAGCAAGCCTTCGGGTGAGTGTACCTTTCGA  
ATAAGCGCCGGCTAACTACGTG

>6434 len=142 tot-seq=1

TGGGGAATATTGGGCAATGGGCGCAAGCCTGACCGAGCAACGCCGCGTGAACGAAGAAGT  
TATTCGTAATGTAAAGTTCTTTTATCAGGGAAGAAAGAGGAATTTGACGGTACCTGAGGA  
ATAAGCTCCGGCTAACTACGTG

>6435 len=142 tot-seq=1

TAGGGAATCTTCCACAATGGACGCAAGTCTGATGGAACAACGCCGCGTGAGTGAAGAAGG  
CCTTCGGGTTGTAAACCGCTTTGATTGGGAGCAAGCCTTCGGGTGAGTGTACCTTTCGA  
ATAAGCGCCGGCTAACTACGTG

>6436 len=142 tot-seq=1

TAGGGAATTTTTTACAATGGGCGCAAGCCTTATGAAGCAATGCCGCGTGAGTGAAGAAGG  
GTTTCGGGTTGTAAACCGCTTTTGATTGGGAGCAAGCTTTCGGGTGAGTGTACCTTTCGA  
ATAAGCGCCGGCTAACTACGTG

>6437 len=142 tot-seq=1

TGGGGAATATTGCACAATGGGCGGAAGCCTGATGCAGCGACGCCGCGTGAGGGATGACGG  
CCTTCGGGTTGTAAACCTCTTTCAGTACGGAAGAAGCCTTGGGTGACGGTACGTGCAGA  
AGAAGCGCCGGCTAACTACGTG

>6438 len=142 tot-seq=1

TAGGGAATCTTGACAATGGGCGCAAGCCTGATGCAGCGACGCCGCGTGAGGGATGGAGG  
CCTTCGGGTTGTAAACCGCTTTTGATCGGGAGCAAGCCTTCGGGTGAGTGTACCTTTCGA  
ATAAGCACCGGCTAACTACGTG

>6439 len=142 tot-seq=1

TGGGGAATATTGCACAATGGGCGCAAGCCTGATGCAGCGACGCCGCGTGCGGGATGACGG  
CCTTCGGGTTGTAAACCGCTTTTGATCGGGAGCAAGCCTTCGGGTGAGTGTACCCTGTGA

GGAAGCCCCGGCTAACTACGTG

>6440 len=142 tot-seq=1

CAATGGGCGGGAGCCTGAACCAGCCAAGTCGCGTGAGGGAAAGACGGTCTACGGATTGTA  
AACCTCTTTTGCCGGGAAGCAAGCTGTGCCACGTGTGGCGCAGCTGAGAGTACCCGGAGA  
AAAAGCATCGGCTAACTCCATG

>6441 len=142 tot-seq=1

TAGGGAATTTTCGTCAATGGGCGCAAGCCTGAACGAGCAATGCCGCGTGCGGGATGAAGG  
CCTTCGGGTTTTAAACCGCTTTTGATTGGGAGCAAGCCTTCGGGTGAGTGTACCTTTCGA  
ATAAGCGCCGGCTAACTACGTG

>6442 len=142 tot-seq=1

TAGGGAATTTTTCACAATGGGCGCAACCCTGACGCAGCGACGCCGCGTGCGGGATGAAGG  
CCTTCGGGTTGTAAACCGCTTTTGATTGGGAGCAAGCCTTCGGGTGAGTGTACCTTTCGA  
ATAAGCGCCGGCTAACTACGTG

>6443 len=142 tot-seq=1

TAGGGAATTTTCGTCAATGGGGGGAACCCTGAACGAGCAATGCCGCGTGAGCGAAGAAGT  
TATTCGTAATGTAAAGTTCTTTTATCAGGGAAGAAAGAGGAATTTGACGGTACCTGAGGA  
ATAAGCTCCGGCTAACTACGTG

>6444 len=142 tot-seq=1

TGGGGAATATTGGGCAATGGGCGCAAGCCTGACCCAGCAACGCCGCGTGAAGGAAGAAGG  
CTTTCGGGTTGTAAACCGCTTTCAGCAGGGACGAGGCCGCAAGGTGACGGTACCTGCAGA  
AGAAGCCCCGGCTAACTACGTG

>6445 len=142 tot-seq=1

TGGGGAATCTTCGCAATGGACGAAAGTCTGACGGAGCAACGCCGCGTGAACGATGACGG  
CCTTCGGGTTGTAAACCGCTTTTGATTGGGAGCAAGCCTTCGGGTGAGTGTACCTTTCGA  
ATAAGCGCCGGCTAACTACGCG

>6446 len=142 tot-seq=1

TGGGGAATATTGACAATGGAGGCAACTCTGACGCAGCGACGCCGCGTGCGGGATGAAGG  
CCTTCGGGTTGTAAACCGCTTTTGATTGGGAGCAAGCCTTCGGGTGAGTGTACCTTTCGA  
ATAAGCGCCGGCTAACTACGTG



>6447 len=142 tot-seq=1

TGGGGAATCTTGCGCAATGGGGGAAACCCTGACGCAGCGACGCCGCGTGCGGGACGGAGG  
CCTTCGGGTTGTAAACCGCTTTCAGCAGGGACGAGGCCGCAAGGTGACGGTAACTGCAGA  
AGAAGCCCCGGCTAACTACGTG

>6448 len=142 tot-seq=1

TGGGGAATATTGCGCAATGGGGGAAACCCTGACGCAGCGACGCCGCGTGCGGGATGAAGG  
CCTTCGGGTTGTAAACCGCTTTCAGCAGGGACGAGGCCGCAAGGTGACGGTACCTTACTA  
AGAAGCTCCGGCTAAATACGTG

>6449 len=142 tot-seq=1

TGGGGAATATTGCACAATGGGGCGAAAGCCTGATGCAGCGACGCCGCGTGCGGGATGAAGG  
CCTTCGGGTTGTAAACCGCTTTTATTGGGAGCAAGCCTTCGGGTGAGTGTACCTTTCGA  
ATAAGGACCGGCTAATCCGTG

>6450 len=142 tot-seq=1

GGTCCCAGAGGAGTTGCTTGAAGAGGGTCCTAAGGCCAGTCATCAGAGAAGGAATACCT  
GGGGTGGAGATTCCAGGAAGATACACACATCACCTGGTCCACAGCCTCTCCAGCCTTACT  
TTCCAACACTGGAGTTATTTGA

>6451 len=142 tot-seq=1

CGAGATATACCTGTGACTGGAGTTCAGACGTGTGCTATTCCGATTCTACGGAGGCAGCA  
GGCACACAATAAATGGCATTTCACAGCCATGTGGGAAAGACCACATGCCAGGTGGGACAC  
CTGGGGAGGCTGGGAAACTCGC

>6452 len=142 tot-seq=1

CGATTCATTGCTGCGTTTCTGAATAGGTTGCCACTGGTAAGTGATTCCATGGGAACATG  
GCTGGCGTAACGAGGATGCGGCCACAGGTCGTGGGGGAAGGGAAGGGAAGCAGGCTCTGC  
TCACCTCTGCAGCCCCTCTGCC

>6453 len=142 tot-seq=1

CTGAGGATGGCGGAAACTGCCTCTCCAGCAGCACCCGGGAAACTCAGCACTGCCGTGTTC  
ACATGGCACCTGTTTATTCTCTCCAGCAGCACCCAGGAAACTCATCACTGCCGTGTTCA  
CATAGCACCTGTTTATTCTCT

>6454 len=142 tot-seq=1

GGGCGAAAGCCTGACGGAGCAACGCCGCGTGAGTGATGAAGGTCTTAGGATCGTAAAGCT  
CTGTTATTAGGGAAGAACAACGTGTAAGTAACTGTGCACGTCTTGACGGTACCCAATCA  
GAAAGCCACGGCTAACTACGTG

>6455 len=142 tot-seq=1

TGGGGAATATTGGGCAATGGGCGAAAGCCTTACCCAGCAATGCCGCGTGCGGGATGAAGG  
CCTTCGGGTTGTAAACCGCTTTTGATTGGGAGCAAGCTTTCGGGTGAGTGTACCTTTCGA  
ATAAGCGCCGGCTAACTACGTG

>6456 len=142 tot-seq=1

GCAGGGGGGAAGAGGGGACAAGGGAGGAAACGCGGAGCCAGCAAGGCGGGGGGGGGGAAG  
AAGGGGGGAGGACGGGAAAACACTTTGAGTAGTGAAGAAAAAATGACGGTACCTTCAGA  
AGAAGCAACGGCTAAAGACGTG

>6457 len=142 tot-seq=1

CCTCCTTACAGATACAGATGTCAAGACAGATGAACAGGTAAGAGGGAAAAGGCTCCACG  
CTGGGGGCTGCTTGTGTCCCCTGGGTCAGTCCAGCCTGACAAGGGGCCTTATCATTAAA  
GCCATGTCAGTCTACACCAGCC

>6458 len=142 tot-seq=1

TAAAGAATATTGCGCAATGGGGGAAACCCTGACGCAGCGACGCCGCGTGCGGGATGAAGG  
CCCTCGGGTTGTAAACCGCTTTTGATTGGGAGCAAGCCTTCGGGTGAGTGTACCTTTCGA  
ATAAGCGCCGGCTAACTACGTG

>6459 len=142 tot-seq=1

TCGAGAATCTTCGGCAATGGGCGCAAGCCTGACCGAGCGACGCCGCGTGAGGATGAAGG  
CCTTCGGGTTGTAAACTCCTGTGAGGGGGAAGAAGCCGCAAGGTTGACTGATCCCTGGA  
GGAAGCACGGGCTAAGTTCGTG

>6460 len=142 tot-seq=1

TGGGGAATCTTGCAGCAATGGGGGAAACCCTGACGCAGCGACGCCGCGTGCGGGATGAAGG  
CCTTCGGGTTGTAAACCGCCTTCAGCAGGGACGAGGCCGCAAGGTGACAGTACCTGCAGA  
AGAAGCTCCGGCTAAATACGTG

>6461 len=142 tot-seq=1

TGGGGAATATTGCACAATGGACGGAAGTTTGATGCAGCGACGCCGCGTGAGGGTGTAGG

CCTTCGGGTTGTAAACCGCTTTTGATTGGGAGCAAGCCTTCGGGTGGGTGTACCTTTCGA  
ATAAGCGCCGGCTAACTACGTG

>6462 len=142 tot-seq=1

TGGGGAATATTGCACAATGGGGGGAACCCTGATGCAGCGACGCCGCGTGAGTGAAGAAGT  
ATTTCCGGTATGTAAAGCTCTATCAGCAGGGACGAGGCCGCAAGGTGACGGTACCTGCAGA  
AGAAGCCCCGGCTAACTACGTG

>6463 len=142 tot-seq=1

TGGGGAATATTGCACAATGGGCGCAAGCCTGATGCAGCGACGCCGCGTGGGGGATGACGG  
CCTTCGGGTTGTAAACTCCTTCGACAGGGACGAAGCTTTATTGTGACGGTACCTGTAGA  
AGAAGTACCGGCTAACCACGTG

>6464 len=142 tot-seq=1

CTCCTCCACCTGCAAAGCAATCCTGGCACCCAGTCTGGCCAGGGAGTATGGTTGGCAGT  
ACTGGGTGTCTAGTTTCCAGTCAGCAATCCAGCCCAGCTGCAAAGCACAGATGGCAAC  
CATGCCCAGGCAGGGAACCAAG

>6465 len=142 tot-seq=1

TGAGGAATATTGGTCAATGGGCGTAAGCCTGAACCAGCCAAGTCGCGTGCGGGATGAAGG  
CCTCCGGGTTGTAAACCGCTTTTGATTGGGAGCAAGCCTTCGGGTGAGTGTACCTTTCGA  
ATAAGCGCCGGCTAACTACGTG

>6466 len=142 tot-seq=1

GGGCGCAAGCCTGATGAAGCCAGGCCGCGTGCATGAAGAAGGCCTTCGGGTTGTAAAGTA  
CTTTCAGCGGGGAGGAAGGCGACAGGGTTAATAACCCTGTCGATTGACGTTACCCGCAGA  
AGAAGCACCGGCTAACTCCGTG

>6467 len=142 tot-seq=1

GGACGCAAGTCTGATGGAGCAACGCCGCGTGAGTGAAGAAGGGTTTCGGCGCGTAAAGCT  
CTGTTGTTGGTGAAGAAGGACAGGGGAGTAACTGACCTTGGGGTGACGGTAATTAATTA  
GAAAGTCACGGCTAACTACGTG

>6468 len=142 tot-seq=1

GGACGAAAGTCTGATGGAGCAACGCCGCGTGAGTGAAGAAGGGTTTCGGCTCGTAAAGCT  
CTGTTGGTAGTGAAGAAAGAGAGAGGTAGTAGCGGGCCTTTATTTGACGGTAATTAGTGA

GAAAGGCACGGCTAACTACGTG

>6469 len=142 tot-seq=1

GGACGAAAGTCTGATGGAGCAACGCCGCGTGAGTGAAGAAGGGGTTCCGGCTCGTAAAGCT  
CTGTTGGTAGTGAAGAAAGATAGATTTAGTAGCTGGCCTTTATTTGACGGTAATTACGTA  
GAAAGTCACGGCTAACTTCGTG

>6470 len=142 tot-seq=1

GGACGAAAGTCTGATGGAGAAACGCCGCGTGAGTGAAGAAGGGTTCCGGCTCGTAAAGCT  
CTGTTGGTAGTGAAGAAAGAGAGAGGTAGTGACTGGCCTTGATTTGACGGTATTTAATTA  
GAAAGTCACGGCTAACTACGTG

>6471 len=142 tot-seq=1

TGAGGAATATTGGTCATGAACCAGCCAAGTAGCGTGCAGGATGACGGCCCTATGGGTTGT  
AAACTGCTTTTATGTGGGGATAAAGTGCGTGACGTGTCATGCATTGCAGGTACCACATGA  
ATAAGGACCGGCTAATCCGTG

>6472 len=142 tot-seq=1

TGGGGAATATTGCACAATGGGCGCAAGCCTGATGCAGCGACGCCGCGTGAGGGATGGAGG  
CCTTCGGGTTGTAAACCTCTTTTGTGGGAGCAAGCCTTCGGGTGAGTGTACCATTCTGA  
ATAAGGACCGGCTAATCCGTG

>6473 len=143 tot-seq=1

CAGTTGGGCTGCCTGGGGGAGAGAGGCTGTACCCAAGCAGGGCCAGTGAACATGGAGGG  
AGGCTCAGAGGACACCAGCATTATTTTTGGCTGTATTTCTTTGTATTTTAGGATTACTG  
CCTTTATCCATCTTCATTGCTAA

>6474 len=143 tot-seq=1

TGGGGAATTTTGCACAATGGAGGAAACTCTGATGCAGCGACGCCGCGTGCGGGATGAAGG  
CCTTCGGGTTGTAAACCGCTTTTGATTGGGAGCAAGCCTTTTGGGTGAGTGTACCTTTTCG  
AATAAGCGCCGGCTAACTACGTG

>6475 len=143 tot-seq=1

GTCAATGGGCGCAAGCCTGAACCAGCCAAGTAGCGTGAAGGATGACTGCCCTATGGGTTG  
TAAACTTCTTTTATACGCGAACAACCGCAGGTACGTGTACCTGTCTGCGTGTAGCGTATG  
AATAAGCATCGGCTAACTCCGTG

>6476 len=143 tot-seq=1

CAGGGAATCTCCGCAATGGGCGAAAGCCTGACGCAGCGACGCCGCGTGCGGGATGAAGG  
CCTTCGGGTTGTAAACCGCTTTTGATTGGGAGCAAGCCTTTGGGTAAGTGTACCTTTCG  
AATAAGCGCCGGCTAACTACGTG

>6477 len=143 tot-seq=1

GCCTGCTCTGCCAACACCAGGCTGGAGGCAGGTTTTAGGGAAGGCTGGGCTTCCCGGCC  
TCAGAGCTGCACCCATGCTACCTGTGAGCTTCTGGGGCTCCTGGAGCCTCGAGATGGCG  
TGGAAAGGCCAGGGTCGTCCGGTG

>6478 len=143 tot-seq=1

TGGGGAATATTGCACAATGGGCGCAAGCCTGATGCAGCCGTGCCGCGTGTGTGAGGAAGG  
CCTTCGGGTTGTAAACCGCTTTTGATTGGGAGCAAGCCTTTGGGTGAGTGTACCTTTCG  
AATAAGCGCCGGCTAACTACGTG

>6479 len=143 tot-seq=1

TGAGGAATATTGCGCAATGGGGGAAACCCTGACGCAGCGACGCCGCGTGAAGGATGAAGG  
TCTTCGGATTGTAAACCGCTTTTGATTGGGAGCAAGCCTTTGGGTGAGTGTACCTTTCG  
AATAAGCGCCGGCTAACTACGTG

>6480 len=143 tot-seq=1

TGGACGCAAGTCTGATGGAGCAACGCCGCGTGAGTGAAGAAGGGTTTCGGATGGAAAAGC  
TCTGTTGTTGGTGAAGAAGGACAGGGGTAGTAACTGACCTAAAAGAGACGGTAATCAATT  
AGAAAAGTCACGGCTAACTACATG

>6481 len=143 tot-seq=1

TGGGGAATCTTGCACAATGGGGGAAACCCTGACGCAGCGACGCCGCGTGCGGGATGAAGG  
CCTCCGGGTTGTAAACCGCCTTTGATTGGGAGCAAGCCTTTTGGTGAAGTGTACCTTTCG  
AATAAGCGCCGGCTAACTACGTG

>6482 len=143 tot-seq=1

TGGGGAATATTGCACAATGGGGGAAACCCTGATGCAGCGACGCCGCGTGGGGGATGAAGG  
CCTTCGGGTTGTAAACCCCTTTCAGTAGGGAACAAGGCCATGATTGTTGTTGTGGTTGAG  
GGTACTTGCAGAAGAAGCGCCGG

>6483 len=143 tot-seq=1

TGGGGGAAACCCTGACGCAGCGACGCCGCGTGCGGGATGAAGGCCTTCGGGTTGTAAAGT  
ACTTTCAGCGGGGAGGAAGGGAGTAAAGTTAATACCTTTGCTCATTGACGTTACCCGCAG  
AAGAAGCACCGGCCAACTCCGTG

>6484 len=143 tot-seq=1

GGACGGAAGTCTGACCGAGCAACGCCGCGTGAGTGAAGAAGGTGTTCCGATCGTAAAGGT  
AGGTTGTTAGAGAAGAACGTTGGTAGGAGTGGAAAATCTACCAAGTGACGGTAACTAACC  
AGAAAGGGACGGCTAACTACGTG

>6485 len=143 tot-seq=1

TGGGGAATTTTGGACAATGGGGGAAACCCTGATCCAGCCATGCCGCGTGCGGGATGAAGG  
CCTTCGGGTTGTAAACCGCTTTTGATTGGGGGCAAGCCCTTTGGGTGAGTGTACCTTTCG  
AATAAGCGCCGGCTAACTACGTG

>6486 len=143 tot-seq=1

GGGGTTGCTCTCTAGGCAGGCACAGCTGTACTGGCTGGGGCACCCCAGGGTTCAGCAGC  
GGGAGGGAAGGGTGCAAGCTGAGGGCTGGGCGGGCCTGCCGAGAGCCTGTGGTGGTTAAC  
CCCTCCGGAACGCAGTCCACAG

>6487 len=143 tot-seq=1

TAGGGAATTTTACAATGGGCGCAAGCCTTATGAAGCGACGCCGCGTGCGGGATGAAGG  
CCTTCGGGTTGTAAACCGCTTTTGATTGGGAGCAAGCCTTTGGGTGAGTGTACCTTTCG  
AATAAGCGCCGGCTAACTACGTG

>6488 len=143 tot-seq=1

ATCAGAGTGAATAGTAGATGTGATAACAGAAGCAAGAGGTTAGAATAATGTGGCCATGAG  
CTAAAGAACGCAGCTAAGGAATGTGGCTTCTAGAGGTTGGAAGAGGTAAGAAATGGATTA  
TTTCGTAGAGCCTCCAGAATGAA

>6489 len=143 tot-seq=1

TGGGGAATTTTGGACAATGGGCGCAAGCCTGACGCAGCGACGCCGCGTGCGGGATGAAGG  
CCTTCGGGTTGTAAACCGCTCTTGATTGGGAGCAAGCCTTTGGGTGAGTGTACCTTTCG  
AATAAGCGCCGGCTAACTACGTG

>6490 len=143 tot-seq=1

GGACGGAAGGCGGACCGAGCAACGCCGCGGGAGGGAAGAAGGTGTTCCGATCGTAAAGCT

CTGTTGTAAGAGAAGAACGAGTGTGAGAGTGGAAAGTTCACACTGTGACGGTATCTTACC  
AGAAGGGGACGGCTAACTACGTG

>6491 len=143 tot-seq=1

TAGGGAATCTTCCACAATGGGCGCAAGCCTGATGCAGCGACGCCGCGTGCGGGATGACGG  
CCTTCGGGTTGCAAACCGCTTTTGACTGGGAGCAAGCCTTTGGGTGAGTGTACCTTTCG  
AATAAGCGCCGGCTAACTACGTG

>6492 len=143 tot-seq=1

TGAGGAATATTGGTCAATGGACGCAAGTCTGAACCAGCCAAGTAGCGTGCAGGATGACGG  
CCCTATGGGTTGTAACCGCTTTTGATCGGGAGCAAGCCTTCGGGTGAACGTACCTTTCG  
AATAAGCACCGGCTAACTACGTG

>6493 len=143 tot-seq=1

GGGGGCAACCCTGAACGAGCAACGCCGCGGGAGTGAAGAAGGTTTTCGGATCGTAAAGCT  
CTGTTGTAAGCCAAGAACGAGTGTGAGAGTGGAAAGTTCACCTCTGTGACGGTAGCTTACC  
AGAAAGGGACGGCTAACTACGTG

>6494 len=143 tot-seq=1

GGAAGAAAGACTGACGGAGCAACGCCGCGTGAGTGAAGACGGTCTTCGGATTGTAAAGCG  
CTGTTATACGGGACGAATGGAAAGGTGGTAAATAGCCATCATGAGTGACGGTACCGTAAG  
AGAAAGCCACGGCTAACTACGTG

>6495 len=143 tot-seq=1

TTTTAAAAATATGGGCATCTTCTTTGCGCTGGCATGAGTCAGCACTCTTCCCCACCCC  
TCCGGCCCTGTGCCTGATGACTTGGGCTTGGGGGATGTAGTTGGTGGAAAAGCAACTC  
TTTTTCTGGATTCCAAAGGGTC

>6496 len=143 tot-seq=1

GGAAGAAAGTATGAAGGAGAAAAGAAGAGTGAAGTGAAGAAGGTCTTAGGATTGTAAAGCT  
ATGTTATACGGGACGAACGGCAAGGTGGTAAATAGCCATCATGAGTGACGGTACCGTAAG  
AGAAAGCCACGGCTAACTACGTG

>6497 len=143 tot-seq=1

CTGTAGAGGCAGGGAGGAGCTGGGGAGACCAGAGGGAGGCACTGCTGGTGGCTTCTTCTC  
TTCTCTGCCCCGGCTCACCTTTACTTTATTATCAAACACCTCCTGCCACACCACATAGCC

CTTGCCATAAGAAGAGACGATGT

>6498 len=143 tot-seq=1

GGTGGACTTCCTGGAGGCATGAGAGAACTTTCACCTAAGAAAATGACTGAGGCCTACTTA  
CTGGAGCCTGTCCTAATAAAGGAAGCTCGGCCTCGCCTCTGGGCAGGCTCGCAGGGGGCA  
TTACCAGGCCTGTCCTCTCTCCC

>6499 len=143 tot-seq=1

CCTGGAAGCTGGTGTGGTGGACCCAGAGCCACAGTCAGACCTCTGCCCCAGGGCTCCTTT  
CTCTGTGCGGCGGTGGGATCTTGGTCTGGCAAGGGTGGGGGCTGACCCAGAGAGCCTGCT  
GTGAGGGAGCCCCAGATAGTAA

>6500 len=143 tot-seq=1

GTCAATGGCCGGGAGGCTGTACCAGCCAAGTCGCGTGAGGGAAGACGGTCCTATGGATAG  
TAAACCTCTTTGGTCAGGGAGAAAAATCTGCCACGTGTGGCAGGATGAGAGTACCTGAAG  
AAAAAGCATCGGCTAACTCCGTG

>6501 len=143 tot-seq=1

TGAGGAATATTGGTCAATGGTCGGGAGACTGAACCAGCCAAGCCGCGTGCGGGATGAAGG  
CCTTCGGGTTGTAAACCGCTTTTGATTGGGAAGCAAGCCTTCGGGTGAGTGTACCTTTTCG  
AATAAGCGCCGGCTAACTACGTG

>6502 len=144 tot-seq=1

CTGAGTCCTGTGTTCCCCCTTACACCCTGGTACTGGAGGCTTCCCCAAGGTCAGAACT  
GAGGCTGGCCCTCCCCTCCTCTGCAGAGTTGCACATTCAGCCACCCCCAGCTGTAGGA  
AAGTTCCAGCCTGGCCTGGGCTC

>6503 len=144 tot-seq=1

CACAGCTGTCAGGACTCCAGAGCAGTATTACCAGACTTTCAGCCCCGAGCTCCAGCCACTC  
CCCTGCACGGTCTGTGGGTCGCTCCCCTTCTATAGCTCCACCCCGTCACCACTGATGCC  
CAATCTGGAGAACTTCCCCTATAG

>6504 len=144 tot-seq=1

GAAACACAGAGAGAAATAGACTGAACCTGGCCGTGAGGGGAGGAGAAGTGGAGCAGAGAG  
ATAGAGAGGAGTGGGGAGGGAGGCTGGGAGGCATATCAAAAATAGTCCGGTTATAAGGAG  
AATGAGTAAGTAGGGGAGGGAAGC



>6505 len=144 tot-seq=1

TGGGGAATCTTGACAATGGGCGAAAGCCTGATGCAGCGACGCCGCGTGAGGGATGAAGG  
CCTTCGGGTTGTAAACCTCTTTAGTAGGGAAGCAGCCCTTCGGGGTGACGGTACCTGCA  
GAAGAAGCGCCGGCTAACTACGTG

>6506 len=144 tot-seq=1

TGAGGAATATTGGTCAATGGACGAGAGTCTGAACCAGCGACGCCGCGTGCGGGATGACGG  
CCTTCGGGTTGTAAACCGCTTTTACTGGGAGCAAGCCCTTCGGGGTGAGTGTACCTTTC  
GAATAAGCACCGGCTAACTACGTG

>6507 len=144 tot-seq=1

GAAAATTTGAATTTTAAAACTTACAATACAAGGAGACACTCCATCAATGATTGACAGAA  
ACTGGTGGATAAATACCCAGCTCCCTCTCTCCTCAGACAGTATAACTCTGAGGCATGTG  
GTCTACCTTGTTTCCCAGAGGTTT

>6508 len=144 tot-seq=1

GCAGCAGTGGGGAATATTGCACAATGGGGGAAACCCTGATGCAGCGACGCCGCGTGAACG  
AAGAAGGTATTCGTATCGTAAAGTTCTATCAGCAGGGAAGAAGAAATGACGGTACCTGAC  
TAAGAAGCACCGGCTAAATACGTG

>6509 len=144 tot-seq=1

TGACGAATATTGGCCACCGACGCAAGTCTGAACCAGCCAAGTAGCGTGCAGGATGACGG  
CCCTATGGGTTGTAAACTGCTTTTATATGGGGATAAAGTGGGGAACGTGTTCCCTTTTGC  
ATGTACCATATGAATAAGGATCGG

>6510 len=144 tot-seq=1

TGGGGAATATTGCACAATGGGCGGAAGCCTGATGCAGCGACGCCGCGTGAGGGATGACGG  
CCTTCGGGTTGTAAACCTCTTTAGTAGGGAACAAGGCCTTCGGGTTGAGGGTACTCGCA  
GAAGAAGCGCCGGCTAACTACGTG

>6511 len=144 tot-seq=1

ATGGACGCAAGTCTGATGGAGCAACGTCGCGTGAGTGAAGAAGGGTTTCGGCTCGTAAAG  
CTCTGCTGTTGGTGAAGAAGTGCATTTTTAGTAACTGACCTTTGTTTGACGGTAATCAAT  
TAGAAAGTCACGGCTAACTACGTG

>6512 len=144 tot-seq=1

ATCATGAGGTCAAGAGATCGAGACCATCCTGGCCAACATGGTGAAACCCCGTCTCTACTA  
AAAATACAAAAATTAGCCGGGCGTGGTGGCATGCATCTGTAGTCCCAGCTACTCAGGAGG  
CTGAGGCAGAAGAATCGCTTGAAC

>6513 len=144 tot-seq=1

ACCGGTGAAGACCAGCAAACCATCCTTGACATTGCCGAACATTGCAAACAGCAATACGAA  
GACCAGAAGCAACGACACAGGGACGACGATTTGCAATCGCTGTGTGCGGGACTGCAGGTT  
TTCAAATGTGCCACCCAGCTCGT

>6514 len=144 tot-seq=1

TTGTGCCTGTAGACCCAGCCAAGAGGAAGAGGTGGGCCTGGAGAAGCCCCCATGAGGCAG  
AGGTTGGGCCTGTAGACGCTGACAGGAGGCAGGAGCTGGGCCTGGACAGGTCAACTTGAG  
GAGATTTTGGGCCTTCATAGGCCA

>6515 len=144 tot-seq=1

TTTAGCAGTTAAATGCAACATCCAGGAATAAGGTTATTTCTGTCTTCTCACATTGACAAT  
TCTCATTATGTTGACTTTCATTCTCAGCCTAGGTGCCTCTTGATTCCAGAGTAATTTACA  
CAGCTCCACTTAGCATATCCTTAC

>6516 len=144 tot-seq=1

TCAGGGCAGCTTCACTGAGGAGGTGACCTTGGAGCAAGCCTTACAGGGGAGCATGTGAGC  
AGGCAGGTGTGTGGGGATGTGCATTCCAGGAGAAGGAACAGCAAAGAGCAAAGTCCCCAG  
AGCAGCAGCAAGCCCAGCCTCCAC

>6517 len=144 tot-seq=1

GAAGTGCAGGGCCGAGGGGTGCTGTGCAGGAAGGAGGAGGGACATGTGGGGTGCTTCGCT  
GGTAACCCCCCTTCTGGAGTGACCTCCTGGTGTGGCCGCTTGGATCCTGCTACTTTCAT  
TTTAAAAGTTGGCAGCATGTTGGG

>6518 len=144 tot-seq=1

AGGGCTTCTGTAGGTCTGGGGGAGTAATGTGACCTCGTGGGGTGTGGGAGGATCTACC  
AGGCAAAGCGCCTCCAGAATGCAGCAGAGGGCTTGTGTAGGTCTGGGGGAGTAATGTGA  
TCTAACTCATGGGGTACTGGGAGG

>6519 len=144 tot-seq=1

TGGGGAATATTGCGCAATGGGGGAAACCCTGACGCAGCGACGCCGCTGCGGGATGACGG

CCTTCGGGTTGTAAACCGCTTTTACTGGGAGCAAGCCCTTCGGGGTGAGTGTACCTTC  
GAATAAGCACCGGCTAACTACGTG

>6520 len=144 tot-seq=1

GGAGTGTGTCTGGGGTGAGGTGCCAGCTGAGAGCAGGACCCAGGACCCAGGCCTAAGC  
CCTGCTCTTGCTGGAGGCTGGGGCGGATTTACCGCTGGAGGGAAACCGTGCCTCTGTGA  
CGTGTGAGGGATGTTTTCTAGTCT

>6521 len=144 tot-seq=1

GCAGGCTCTCCCGAAGCTGCTTCTGTTACACATGTGCTTCCAACTCTCCACTTCTC  
AGGAACTCCCTAATTGTGCTGTGGGTCCAGGACACTGTCCATGAGGGGGCCATGGC  
AGGGTCTCCCGGACGGTATGACT

>6522 len=144 tot-seq=1

GTCACATACCTGGAATCACCTGCTTTGGCCAAGTTCTATAACCAGAGGGTCTCTGGTCA  
GGGAGGTGTCAATAATACGTCCATCTACCAAGCTTCCCTGGGGGGAGAGAGCATCAAGAG  
CATACATCTAGCACCTCTCCCTC

>6523 len=144 tot-seq=1

CACACGTGTCTTCTCCCGAGGTACGCTGGCAGCTCCACATAGAAAACCTCACACCTCCCA  
TAAGGACAGCGGGCTCCCTCCTGGGACCCCTCCCTTGGCTTCTCCCGAGCCCTGCTCC  
TAGAAGGGAGGCTTGGAGCAGGAA

>6524 len=144 tot-seq=1

ATGGGGGCAACCCTGACCGAGCAACGCCGCGTGAGTGAAGAAGGTCTTCGGATCGTAAAG  
CACTGTTGTAAGTGAAGAATGCCATATAGAGGAAATGCTATGTGGGTGACGGTAGCTTAC  
CAGAAAGCCACGGCTAACTACGTG

>6525 len=144 tot-seq=1

GGATGAGTTCAAGGGCAGGACCCATAGCTGGGAATGCCACAGAAGACACAGTTCAGAGGA  
AGAGTGGCTGCACAAGGAAAGAAGGCAGACTCCCGAGTTCTCTTGAAAACCTTTTCATAG  
TAGACACTGAGTGGGAAGGGCCAG

>6526 len=144 tot-seq=1

AGGGAACGTCGCCACTAAGGCCTTGACAGAAAGAGTTTTGGGGACCAACAGGGGGCCAG  
TGTGGCTGAATATAGCCAGTAGGAGGAAGAAGTTCTGGAAGGGGCCAGGCCATGTAAGC

ACGGCAGATTGTTCTCATTTAATT

>6527 len=144 tot-seq=1

CCTACCATGACCTCGGAATGGAGGGACCTCGTGCCATTACCCACATAACAAGTGGGAAAA  
TTCTTACGGCTGATGCACGACTAAAGAAATGGTTTTCGCCCGACCAAATCACCATTATGA  
AGGAAGCTGTGGAAGATCATAGAG

>6528 len=144 tot-seq=1

TAGGGAATCTTCCACAATGGACGCAAGTCTGATGCAGCGACGCCGCGTGCGGGATGACGG  
CCTTCGGGTTGTAAACCGCTTTTGACTGGGAGCAAGCCCTTCGGGGTGAGTGTACCTTTC  
GAATAAGCACCGGCTAACTACGTG

>6529 len=144 tot-seq=1

TTGGGGCGACCAGGTGAGCTGGCCCTTGTGGGAGGATGTAAGTACTCCTGAGCCTGGCG  
AGCCAGGCAGCCCCTCGCCAACATCCCCACCCCTACCTCTCCAGCCCCCGCATTCCCT  
GATCCTCCCATCCGCTCCCCTGAC

>6530 len=144 tot-seq=1

TGAGCCATGATCTCACCCTGCGCTCCACCCTGGCAACAGAGCGAGACCCTGACTCAAAT  
AATAATAAACTTAGTCTTTGAAATATCATGCACATTTTACACCTGCAATCCATCACAAT  
TTAGACCAGCCACATTTCAAATGC

>6531 len=144 tot-seq=1

TAGGGAATCTTCGGCAATGGGGGCAAGCCTGATGCAGCGACGCCGCGTGCGGGATGACGG  
CCTTCGGGTTGTAAACCGCTTTTGACTGGGAGCAAGCCCTTCGGGGTGAGTGTACCTTTC  
GAATAAGCACCGGCTAACTACGTG

>6532 len=144 tot-seq=1

TGGGGAATATTGCACAATGGGCGGAAGCCTGATGCAGCGACGCCGCGTGGGGGATGACGG  
CCTTCGGGTTGTAAACTCCTTCGCCATTGACGAAGCCCTTTGGGTGACGGTAGGTGGA  
GAAGAAGCACCGGCTAACTACGTG

>6533 len=145 tot-seq=1

CCCCACCTCGGGCCCCACCCCTGTCCCCGTCTCCTCCTGGTTGCCCTGAGTTTAGAAG  
AGCAGCCGCTGCCGCCACCACCTCCGGAGGGCACCAGGGCTGCTGTCCAGGGAGGGAC  
AGTAGCAGTGAGGCTCTGGCCAGTC

>6534 len=145 tot-seq=1

GAAAGGAGGACAAGGCAGCAGATGAAGGAAAAAAAAATGACACGAGGACAGGACCACTCC  
TAGATATGGGTGGAGGAGGGGGTTATTTAGATAAGAGGGAAAACACAGTCAGAGGCAT  
TTGGAAGGGTCCAGTGTGAGCATGG

>6535 len=145 tot-seq=1

AGAGTGAGGTAATGTCCAAACAATGACTGGCCCCACTTGAGATTCATCCCATGGGCAAGA  
ACCAATCTCTGACTCTATTAGTGATAGATACTCTGTTATACTTGCAGACAGAACCCTAGC  
ATAACTGTCTTCTTATAGTCTCCAC

>6536 len=145 tot-seq=1

GCAGGGTATGCTGTAGACAAAGCTCATTCTGGGGGAGGCGAGGGGTGGAGGGAGGGGGG  
CAGCATCTTGAGTTGCTCACTCCTCAAGTTCTAGGACCTGCTTTCTTGCTATGACCATG  
GAGGGCAGAGAGCGCGCACTGATGC

>6537 len=145 tot-seq=1

GAGGAGGAGGAGGAAGAAGAGGAGGAGGAGGAGCAGCAGCAGCAGCAGCAGCAGCAG  
CAGCATCACGTGTGCACGAGTTAAGGCCAGCCTAAGCAACACATGGAGAGCCTCACAAA  
TGAAAGCTATGGTCACTATGTCCTG

>6538 len=145 tot-seq=1

GGGTAGTCAATGTTTCAGTGCCTTCCACTTAGCGAAGTGGGGGGTTTGATGGGCATCTGT  
CTGAACTGGCCTCCTAGTCTGGATTTCTGGAAGCCACTGTCCTTTTACTTTCTCTCCT  
TGATGGCAGAAGGCAGAAAGTGGGC

>6539 len=145 tot-seq=1

TGAGGAATATTGGTCAATGGGCGAGAGCCTGAACCAGCCAAGTAGCGTGCAGGAAGACGG  
CCCTATGGGTTGTAAACTGCTTTTATGCGGGGATAAAGTGC GCGACGTGACGGTACCTGC  
AGAAGAAGCCCCGGCTAACTACGTG

>6540 len=145 tot-seq=1

TGGGGAATATTGCACAATGGGCGCAAGCCTGATGCAGCGACGCCGCGTGC GGGATGACGG  
CCTTCGGGTTGTAAACCGCTTTTGATCGGGAGCAAGGCACTTTGTGTTGAGTGTACCTTT  
CGAATAAGCACCGGCTAACTACGTG

>6541 len=145 tot-seq=1

TGGGGAATCTTCGCAATGGACGAAAGTCTGACGGAGCAACGCCGCGTGAGTGATGACGG  
CCTTCGGGTTGTAAACCTCTTTTGTAGGGAGCAAGGCACTTTGTGTTGAGTGACCTTT  
CGAATAAGCACCGGCTAACTACGTG

>6542 len=145 tot-seq=1

TAGGGAATATTGCGCAATGGACGGAAGTCTGACGCAGCGACGCCGCGTGAGCGATGAAGG  
CCTTCGGGTCGTAAAGCTCTGTCTTGGGGAAGAAGGTCTTCGGACTTGACGGTACCCAA  
GAAGAAAGCCCCGGCTAACTACGTG

>6543 len=145 tot-seq=1

GCATGCAAATTACCCACTCCCGACCCGAAGAGGTAGTGACGAAAGTTTTCGGATCGTAAA  
GCTCTGTTGTTGGTGAAGAAGGATAGAGGTAGTAACTGGCCTTTATTTGACGGTAATCAA  
CCAGAAAGTCACGGCTAACTACGTG

>6544 len=145 tot-seq=1

AATGGACGAAAGTCTGGCGGAGCAACGCCGCGTGAGTGAAGAAGGATTTTCGGTTCGTAAA  
ACTCTGTTGTTAAGGAAAAAAAAAAGAATAGTAACTAAAAACAAAAGAGACGGTACCTAA  
CCAGAAAGCCACGGCTAACTACGTG

>6545 len=145 tot-seq=1

TGGGGAATATTGCGCAATGGGGGAAACCCTGACCCGGGGAGGTAGTGACGAAAATAACA  
ATACAGGACTCTTCGAGGCCCTGTAATTGGAATGAGTCCACTTTAAATCCTTTAACGAG  
GATCCATTGGAGGGCAAGTCTGGTG

>6546 len=145 tot-seq=1

TGGGGAATATTGCACAATGGGGGAAACCCTGATGCAGCAACGCCGCGTGAGGGATGGAGG  
CCTTCGGGTTGTAAACCTCTTTTGTAGGGAGCAAGGCATTTTGTGTTGAGTGACCTTT  
CGAATAAGCACCGGCTAACTACGTG

>6547 len=145 tot-seq=1

CAATGGGCGAGTGCCTGACGCAGCGACGCCGCGTGTGGGATGAAGGTCTTCGGATTGTAA  
ACCACTGTCGGGAGGGACGAAGGCGCGGGGTTAACTGCCGCCGCGATTGACGGTACCTCC  
AAAGGAAGCACCGGCTAACTCTGTG

>6548 len=145 tot-seq=1

TGAGGAATATTGGTCAATGGGCGAGAGCCTGAACCAGCCAAGTCGCGTGAGGGATGAATG

GCCTATGGCCTGTAAACCTCTTTTGTCAAGGAAGAATAAGGATGACGAGTCATTTCGATGC  
CAGTACTTGACGAATAAGCATCGGC

>6549 len=145 tot-seq=1

CAAAACTAGCAGACCACCAGCTCCATGACCACCATCCGGCTCAGGCAGATCTTTACAGTG  
CAGCCTCAGAAGAGCCAAACAGGGAAGCTGCAGGTTGGGTAAGTTCAGCAGTTCGCACTG  
TCTAGATCCAGCCACAGGAGCAAAT

>6550 len=145 tot-seq=1

TGGTCAATGGACGAGAGTCTGAACCAGCCAAGTAGCGTGCAGGACGACGGCCCTATGGGT  
TGTAACCTGCCTTTATGTGGGGATAAAGTGCCTGACGGGTCATGCATTGCAGGTATCACA  
TGAATAAGGACCGGCTAATTCCGTG

>6551 len=145 tot-seq=1

CAATGGGGGCAACCCTGATCCAGCAATGCCGCGTGTGTGAAGAAGGCCTGCGGGTTGTAA  
AGCACTTTCAGAGGGGAAGAAAAATCGGATCTAACACGTCCGATCTTGACGTTACCCTT  
AGAAGAAGCACCGGTTAACTCCGTG

>6552 len=146 tot-seq=1

TGTGGATGAATAGTTGGATCACGGAAGAAAACAGGTACGAAGGAACAAAAAGTGCCAAAA  
ATGGAGCCTTTGTAGAAGGATGCACAAGAGTAGCCATGACAGGAATCCTAGCTGCTCTT  
TCTTGGTCCCTTGCAACCTAACATCT

>6553 len=146 tot-seq=1

TAGGGAATAGACCGCAATGGGAGAAAGCCTGACGGAGAAACGCCGCGAGAGTGATGAAGG  
TCTTCGGATAGTAAACTCTGCTATTAGGGAAGAACAATGTGTAAGTAACTATGCACGT  
CTTGACGGTACCTAATCAGAAAGCCA

>6554 len=146 tot-seq=1

AGGGATCAGCTGGATGAATGGAAGATGTCAGCAGCAGATGTAAGTGGTTAGTTCAACGGGG  
ACAAAATTCCATGAACACGCCACACGGCCTCTAACTTTCAAGAAGGGCACAGTGATAGGG  
TGAATTTGCAGGAACCAGGGCAGCAG

>6555 len=146 tot-seq=1

AAATAGGATTCAATAAAGTTTAATTTTTATACCAGCATAATTAATTAACAACTGAACA  
AAATTTGTCACACACACAGAAAAGTCTCATGTGTGTGTAACAGAAAATGTCTCAAGGCCA

GTGCTGCAGCGAGCAGGCTGCCCCAT

>6556 len=146 tot-seq=1

TGGGGAATAGAGGACAATGGGGGAAAGCCTGATCCAGACATGCCGCGAGTCTGAAGAAGG  
CCTTCGGGTGGTAAAGGACTTTTGT CAGGGAAGAAAAGGACAGGGTTAATACACCTGTCT  
GATGACGGTACCTGAAGAATAAGCAC

>6557 len=146 tot-seq=1

TAAGAAAGAAAAGGTCGGCTGGAGTTAAGAGTAAAATAAATTCAAATTGGGACTTTCAT  
GAGGCAAATCGACTTTC AACTGCACAAATAACTCCTTTGTTAGGTTTTCCGAGTAGCCGC  
TAATGTCACCAAGAGCTGTTTACAGC

>6558 len=146 tot-seq=1

CGGCATACGAGATAAGGCCGTGACTGGAGTTCAGACGTGTGCTTCCGATCTCCTACGGG  
AGGCAGCGGGGGAGTGGGGGGTGTGTCTCCTGGGTCAGCTTTCATGTGAAGAGAGATCAC  
CTCTGTCCTCACTTAGGCCAGACCAG

>6559 len=146 tot-seq=1

GAAAGAAGATTGAAACATACTTCTCCTAAAGGGCCACACACACTCCAACAAGACCACAC  
CTCCTAATAGTGGCATTCCCTATGGACCTACGGGGCCATTTCCATTCAAACCACCACACT  
TGTTTTGGTGCCATCTGAGCACTTTG

>6560 len=146 tot-seq=1

TAGGGAATTTTCGTC AATGGGGGGAACCCTGAACGAGCAATGCCGCGTGTGTAAAGAAGG  
TCTTCGGATCGTAAAGCACTGTTGTAAGTCAAGAACGGGTGTGAGAGTGGAAAGTTCACA  
CTGTGACGGTAGCTTACCAGAAAGGG

>6561 len=146 tot-seq=1

GTTAAGAGACATAGATGCACACTGGTGCCTCATTATTCTCACTTCAGACACTGTGCGGA  
ACATCTAAGCATAGCTTGAGTGGGGG CAGCTGCACCGCTTCAGCCACAAGCACGCAGCAC  
AGGCAAGTTCATT CATAAAAAGACT

>6562 len=146 tot-seq=1

CGTGAGACGTGGGTGACCCAGAGAGAAGCGGGCTGGGGAGAGGCCCTTATGGACCACGTG  
GAGGGAGGGATCAGTGTGTCCCGTGGGCTGGCAGCCTTGCCAGGTCCTGAAGATGCCAC  
AATAGTGCATGCTCAGCTGGGAGGCC



>6563 len=146 tot-seq=1

GGGGCAGTGGGCTCAGTGGGGCAGGCAGCCACGATTCCCTTGATCCTTGAAGGGCTGGCG  
CACGCCAGCATCTTATCCCCCTCCCTGGGGCCAGGAGATGTGTAGGTTCAAGAACCA  
GACGTTGAATCTTCTTGTAGTCCTC

>6564 len=146 tot-seq=1

CAATGGGCGCAAGCCTGATGGAGCAACACCGCGTGAGTGAAGAAGGGTTTCGGCTCGTAA  
AACTCTGTTGTTGGAGAAGAAGGACAGGGGTAGTAACTGACCTTATTTGACGGTAATCA  
ACCAGAAAGTCACGGCTAACTACGTG

>6565 len=146 tot-seq=1

CAATGGGCGCAAGCCTGATGGAGCAACACCGCGTGAGTGAAGAAGGGTTTCGGCTCGTAA  
AGCTCTGTTGTTGGAGAAGAACGTATCTGAGAGTAACTGTTACGTTTCGACGGTATCTA  
ACCAGAAAGCCACGGCTAACTACGTG

>6566 len=146 tot-seq=1

GAGCCTTGGGCAGCAGCAGAACAGACCATGTGTGTTTCAGGGAGTGGCACCTGGTGTGCCT  
GGAGTCAGGCTGGAAAGTGTGAAGTACTAGTGAGGAAGCTGCACACATGGGCTGGCACC  
GATTGCAAAGGGGTTTCATACCAAAC

>6567 len=146 tot-seq=1

CAGACCCCCTCCCCTGCATAGAGGGCCTGGGAGATATCCAAGCAGCTACAGCCTATGGGG  
CATGGTGGAGACTCACACCTCAGTGGCAATGGTGGAGAAAAGGTTTCTGTCATGCACTG  
CCGGACCACAGGCTCCGTGTCCTGCA

>6568 len=146 tot-seq=1

CAAGGGACGCAAGGCGGAGGGAGCAACGCCGCGGGAGGGAAGAAGGTTTTTCGGATCGGAA  
AGCTCTGTTGTTGGTGAAGAAGGATAGAGGTAGTAACTGGCCTTATTTGACGGTAATCA  
ACCAGAAAGTCACGGCTAACCACGTG

>6569 len=146 tot-seq=1

CAATGGGCGAAAGCCTGATCCAGCCAGGCCGCGTGTTGTGAAGAAGGGCTTCGGAGTGTA  
AGCACGGTAAGTTGGGAGGAAGGGTGGTAGATTAATACTCTGCAATTTTGACGTTACCGA  
CAGAATAAGCACCGGCTAACTCTGTG

>6570 len=146 tot-seq=1

TTTCAAGCAGAAGACGGCATAACGAGATAAACTGTGACTGGAGGTTCCAGACGTGTGCTTT  
TCCGATCTCCTACGGGGGCAGCAGACACCAGGCCTACATGGACCACCTGAAGATATTTTC  
GAACATGAAATCAACAGTCCCTCAAC

>6571 len=146 tot-seq=1

CCCAGGAGGCAAAGGGTGCAGTGAAGTGAAGTACACGCCATGGCACTCCAGCCCAGGTGAC  
AGTGCAAGACTCAATCTCAAAAAAAAAAAAAAAAAATGAAAAAAAAATAATTAATAAAAAATAAA  
TACCCCTCTATCACAATGGACAGAT

>6572 len=146 tot-seq=1

AATGGACGAAAGTCTGACGGAGCAACGCCGCGTGAGTGAAGACGGTCTTCGGATTGTAAA  
GCTCTGTAATACGAGAAAAACGGCAAGGTGATAAATAGCCATCATAAATAACAAAGAAAA  
AAGAGAAAGCCACGGCTAACTACGTG

>6573 len=146 tot-seq=1

CAATGGACGCAAGTCTGATGGAGCAACGCCGCGTGAGTGAAGAAGGTTTTCGGATCGTAA  
AGCTCGGTTGTTGGTGAAGAAGGATAGAGTTAGTAACGGGCCTTTATATGACGGTAATCA  
ACCAGAAAGTCACGGCTAACTACGTG

>6574 len=146 tot-seq=1

CAGAGAGGGATGGGTGCATTTGAGCTCAATCTCTAGTATCAAAGCTCAGCCGAACCTGGA  
GAAGAAGCCACCCAGGGACGAATTCCACTGCTGAGATCATCCAGGACTTAGCTCTCTGCC  
CACTCCCTTAGAGTTAGACCCTGAC

>6575 len=146 tot-seq=1

CCGCAGCCACAGGGGCAGCCGGCGCATATGGGCGCCGAAGTCCTTCCAGGAGCCTGCTAC  
CGTCCGTTCCAGCAGCCATACCACCAGAAACGCCGGTATCAGCGCCAGCAAAATGGCAAA  
TATCCGTCCTGTCCCAATATATCCG

>6576 len=146 tot-seq=1

CAATGGACGAAAGTCTGATGGAGCAACGCCGCGTGAGTGAAGAAGGTTTTCGGCTCGTAA  
AGCTCTGTTGTTAGTGAAGAAAGATAGAGGGAGTAACTGGTCTTTATTTGACGGTATTTA  
CTTAGAAAGTCACGGCTAACTACGTG

>6577 len=146 tot-seq=1

GAAGAAGTCCCCACCAGCGCCACCAACAGCACGATCCCGGCGCGGATACAGAGACCGG

CATTCCGGTCAGCAACAGGTAAAACAGTGCCGCCGACGCGCGCAGCAAATCAGCGGCTT  
ATAAAATTTCCATTTGCGGCCAAAAC

>6578 len=147 tot-seq=1

AAAACAGTAGTGAAGCAGACCCACAGCCCATTTTATGGGAACGGTGA CTCCCTGTCCCTG  
CTCCGGCTGCCTGAACATGAGGGCATTCTGTTGAAGTGACCGTCAACCTTCCATGTTTG  
CTTCTGCCTAAAGCCACTCCAGTCACA

>6579 len=147 tot-seq=1

GGAGGCAGCAGTGGGGGAGATTGCACAAGGGGGGGAACCCGGAGGAAGCGACGCAGAGGG  
GGGGAAGGAGCGGGGCGCGCGGAAAGACCTAGCGGAAGGGAAGAAGGAGGAAGGGACCT  
GACTAAGAAGACCCGGCTAACTACGTG

>6580 len=147 tot-seq=1

GAGAGGGTGCACCACAGAACCCGGACAGCTTCTGGGTCAGGCGGAAGCACAGAGCCGCTGA  
GGCAGCACCCTTTGCAGGCTGCAGACAGCCAGCCACCGTCCGGACCAGAGGACAGGTGTC  
CACCTGGCTTGGGAGGCGGCCTCAGCC

>6581 len=147 tot-seq=1

CATGGGTGGAGAACACCAGCAAGGAGGGCCCTCAGAGGGACTGCCTGTGCCATTGAAAGA  
GGCAATCAGGAAGCCATTTTCTATCCAGTCACTTCTGTTCTTACCATTTAAGTTATCATC  
TTTTAATGTCTAAAACCACTAAAATA

>6582 len=147 tot-seq=1

TTTTTTTTTTCAAGCAGAAGACGGCATA CGAGATGCCTAAGTGA CTGGAGTTCAGACGTG  
TGCTCTGTTGTTAAGGAAGAACGAGTGTGAGAATGGAAAGTTCATGCTGTGACGGTACTT  
AACCAGAAAGGGACGGCTAACTACGTG

>6583 len=147 tot-seq=1

AGGCAGCAGTGGGGAATAGTGGACAAGGGAGGGA ACTCTGATCCAGCAATTCTGGGGGGG  
TGAAGAAGGTTTTAGGACTGTAAAACAATTTTAGTAGGGAAGAAAAAATGACGGTACCT  
ACAGAAGAAGCAACGGCTAAATACGTG

>6584 len=147 tot-seq=1

TGGGGAATATTGCACAATGGGCGAAAGCCTGATGCAGCGACGCCGCGTGAGGGATGACGG  
CCTTCGGGTTGTAAACCTCTTTCAGTAGGGAAGAAGCCCCTTTGGGGGTGACGGTACTT

GCAGAAGAAGCGCCGGCTAACTACGTG

>6585 len=147 tot-seq=1

TGAGGAATATTGGTCAATGGACGAGAGTCTGAACCAGCCAAGTAGCGTGCAGGATGACGG  
CCCTATGGGTTGTAACTGCTTTTATAAGGGAATAAAGTGGGAGTCGTGACTCCTTTTGC  
ATGTACCTTATGAATAAGGACTGGCTA

>6586 len=147 tot-seq=1

TTAGGAATCTTCCCAATGGACGAAAGTCTGAGGGAGCGACGCCGCGTGAGGGATGAAGG  
TTTTCGGATCGTAAACCTCTGAATCAGGGACGAAAGGGCCTTCGGGCAGATGACGGTACC  
TGAGTAATAGCACCGGCTAACTCCGTG

>6587 len=147 tot-seq=1

CAATGGACGAAAGTCTGACGGGGCAACGCCGCGTGAGTGAAGAAGGTCTTCGGATTGTAA  
AGCTCTGTTATACGGGACAAAAAGACGGATGCCGACAGTATCCGTCCGTGACTGTACCG  
TAAGAGAAAGCCACGGCTAACTACGTG

>6588 len=147 tot-seq=1

CCGGTGAGGGCAGAGGCCGGTGGCCCAGGCGTGCGACGCAGGGGGCTCAGTGGGGGTGGG  
AGAGGTGGGCTGATGGTCCCCGTGGTCGGTGGAGGTGAAGAAGTGAAGTCTGGGAAGATT  
TTGGATACTATTCCAATCTCATGGGAG

>6589 len=147 tot-seq=1

GCAATGGGCGAAAGCCTGACGGAGCAACGCCGCGTGAGTGATGAAGGTCTTCGGATCGTA  
AAACTCTGTTATTAGGGAAGAACAGATATATAAGTAACTGTGCACAACCTGACGGTACCT  
AATCAGAAAGCCACGGCTAACTACGTG

>6590 len=147 tot-seq=1

GCAATGGGCGAAAGCCTGACGGAGCAACGCCGCGTGAGTGATGAAGGTCTTCGGATCGTA  
AAACTCTGTTATTAGGGAAGAAAATATGTGTAAGGAAAGGTGAACATCTTGACGGTACCT  
AATCAGAAAGCAACGGCTAACTACGTG

>6591 len=147 tot-seq=1

TGGGGGATATTGCACAATGGGGGAAACCCTGATGCAGCGACGCCGCGTGAGGGATGACGG  
CCTTCGGGTTGTAAACCTCTTTCAGTTGGGAAGAAGTCCCCTTTGGGGGTGACGGTACCT  
TCAGAAGAAGCACCGGCTAACTACGTG

>6592 len=147 tot-seq=1

CACAAGCCCACTTTCCCACTCCCCTGCTGGACTCCATCCGCTGGTTCATGTCCCACCCCT  
GCTCAGCAGCTGGGCTCGCAGCTCTCCTTAACCACCGACCCAGATTGAGATCTCCATCT  
ACGAGGACCGGTGCAGCAGTGGCAGCT

>6593 len=147 tot-seq=1

CAAGAGAGGGAGAGAAGCCTCCCAGAGCGTATGTTTTGTCTACATGAGAAGGATGGTGA  
CAGGGGCATCACCAGCACCGCGGTAATCAATAGATCGGAAGAGCGTCGTGTAGGGAAGAG  
TGGGCCAATGTGTAGATCTCGGTGGTC

>6594 len=147 tot-seq=1

TTAGAATTC AATCAGAGAAGCAGAACCATATAAGTGATATAAAAATATTTATTATAGGGAT  
GAGATCTCACGCAATTGTGGGACCTTGGTGAGTGTATAGGTAAGTCTGTTGCTCCTGTGT  
CTAGTGCTGGGCCTGAAGTCAGCAAGG

>6595 len=147 tot-seq=1

TTAGGAATCTTCCCAATGGACGAAAGTCTGAGGGAGCGACGCCGCGTGAGGGATGAAGG  
TTTTCGGATCGTAAACCTCTGAATCAGGGACGAGAGACGCGGAAGCGGGATGACGGTACC  
TGAGTAATAGCACCGGCTAACTCCGTG

>6596 len=147 tot-seq=1

ACAATGGACGCAAGTCTGATGGAGCAACGCCGCGTGAGTGAATAATTTTTTCGGATCGTA  
AAGCTCTGTTGTTGGTGAAGAAGGATAGAGGTAGTAACTGGCCTTATTTGACAATAATC  
AACCATAAATTC ACTTCTAACTACGTG

>6597 len=147 tot-seq=1

GGTATTCTGAGTCTACAGAGAGGGACCTGCGGGGCCTGCCCCACAGGCACGTGGGGCTC  
CTGCTGGGGCTGTCAAGGACCCCCGGGCACTGAGAGGACATCTGGGCCCTTGGGCAGCCA  
GGCTGACGGGTTCCCTGCACACACGAT

>6598 len=148 tot-seq=1

TGACTGCCCTCAGAAAGACCCAACAAGCAGCACAAAGAGTCAGATATAGATATTTGCACT  
CAACCAATAGACAGAAGCTGCCGACCCCTGTGGTTGAATTAGAGAAAAGCTGGAAGAAGC  
TGAGAAGAAGGAAGACCCTATAGGAGGA

>6599 len=148 tot-seq=1

CACAATGGACGAAATGCTGATGGAGCAACGCCGCGTGAGTGAATAAGGGTTTCGGCTCGT  
AAATCTCTGTTTGTAGTGAAGAAATATAGAGGTAGTATCTGGCTTTTATTTTACGGTAAT  
TACTTATAAAGTCACGGCTAACTACGTG

>6600 len=148 tot-seq=1

CAAAACCTACCTATGGGGTAACATAGTTCCTCTAATAAGGCCACACTTCCAATAGTGCC  
ACTCCCTATGAGCCACACATTTAAACACAAGAGTCCATGGGGGCCATTCTAGTCAGAGC  
ACCACACAAGGTGACTCACAGTCTCATG

>6601 len=148 tot-seq=1

ACCTTGGTGTAATCACTTGAGATGAAGTAATAGAATGTAGACATGGCCAGCTTTCATG  
ATTA AAAACAAAGCAAACAACAACATCAAAGCAAACAGCTCCACAAAGCAATGGGTT  
TCTTCCTGTGTGGCTATTGCTTGCCTT

>6602 len=148 tot-seq=1

TCAATGGACGAGAGTCTGAACCAGCCAAGTAGCGTGAAGGATGAAGGTTCTATGGATTGT  
AAACTTCTTTTATAAAGGAAGAACGGCGGCTACAGGAAATGGTAGCCGAGTGACGGTACT  
TTATTAGAAAGCCACGGCTAACTACGTG

>6603 len=148 tot-seq=1

CTGGCCGGCTGCAGCGCCTGCGGGATGCTCACGAGGCACAGCAGTACTACCTGGATGCAG  
GCGAGGCCGAAGCCTGGATCAGCGAGCAGGAGCTATATGTGTTCTCTGATGAACCCCTA  
AGGTACACGGGAGGGGGGGCAGAGTCCG

>6604 len=148 tot-seq=1

TTAGAGGGTGCGCCAGAGAACCGGACAGCTTCTGGGATGGGCAGAAGCACAGAGCCACTG  
AGGCAGCAGCCTGGGCGGGCCGAGACAACCGGCCACCATCCGGACCAGAGGACAGGTGT  
CCGCCTGGCTTGGGAGGCGACCTCAGCC

>6605 len=148 tot-seq=1

TTTGTGGTCTCAGGCATTCACTGGGGGTGCTTAGAATGTTATCTACCATAGTGAATGGG  
GAACTACTGCACTTATTTGGTTGTAACACAACACAGCCTCTCTAGCTCTTCAGGTAAAAC  
TTTGCAGTTTAGAAGAAAACACCCTATC

>6606 len=148 tot-seq=1

TAGGGAATAGGCGCAATGGGGGGAACCCTGACCGAGAAACGCCGCGAGAGTGAAGAAGG

TTTTCGGATAGTAAAGCTCTGTTGTTAAGGAAGAACGAGTGTGAGAATGGAAAGTTCATG  
CTGTGACGGTACTTAACCAGAAAGGGAC

>6607 len=148 tot-seq=1

ACGAGAGGCAGCAGTGGGGAACTGTGCACAATGGGGGAAACCCTGAGGCAGCGACGCCGC  
GGGATTTAGAAGGCCTTCGGGTTGTAAAAATCTTTTGTATGGGAAGAAAATGACAGTACC  
ATACGAATAAGGACCGGCTAATTACGTG

>6608 len=148 tot-seq=1

TGGGGAATATTGCGCAATGGGGGAAACCCTGACGCAGCGACGCCGCGTGCGGGATGAAGG  
CCTTCGGGTTGTAAGAGAAGAACGTGTGTGAGAGTGGAAAGTTCACACAGTGACGGTAAC  
TTACCAGAAAGGGACGGCTAACTACGTG

>6609 len=148 tot-seq=1

TGAAAATGCAGGGACCCACCTGGAATCAGGAAAGACACACTGCCACTGCAGATGGGTGAC  
TTTCAAGCGACTGCTGCCTTTACATCTGGGCACATAGTAACTGGACGCGAGCCCCGCGGA  
GTAGCCCGCTGAACAAGCAGTGATGCAG

>6610 len=148 tot-seq=1

GCAATGGGGGAAACCCTGACGCAGCGACGCCGCGTGCGGGATGAAGGCCTTCGGGTTGTA  
AAGCTCTGTTAATCGGGACGAATGGTCCTTGTGTGAATAATGCAAGGATTTGACGGTACC  
GGAATAGAAAGCCACGGCTAACTACGTG

>6611 len=148 tot-seq=1

AGCAGTGGGGAATTGTGCACAATGGGGGAAACCCTGACGCAGCGACGCCGCGTGAGGGAT  
GAAGGCCTTCGGGTTGTAAACCGCTTTTGATTGGGAGCAAGACTTTTGGGTGAGTGTACC  
TTTCAATAAGCGCCGGCTAACTACGTG

>6612 len=148 tot-seq=1

CACAATGGACGCAAGTCTGATGGAGCAACGCCGCGTGAGTGAAGGAGTTTTTCGGATAGT  
AAAGATATGTTGTTGGTGAAGAAGGAGAGAGGGAGTAAATGGAATTTATTTGACGGTAAT  
CAACCAGAAAGTCACGGCTAACTACATG

>6613 len=148 tot-seq=1

GCCAGTGGGGAAAGCACCAAGGCTTGCACATCAGGCCAGACCACCGGACCCCCGACCGAA  
AAGTTATAGGCAGTAGACCCCGTCGGAGTCGATACGATTAACCGTCCGCCCCGTACTCG

GAAACCGCTTCTCCATCAACGCCAAAAG

>6614 len=148 tot-seq=1

CACAATGGACGAAAGTCTGATGGAGCAACGCTGCGTGAGTGAAGAAGGGTTTCGGCTCGT  
AAAGCTCTGTTGGTAGTGAAGAAGGATAGAGGTAGGAACCGGCCTTTATTTGACGGTAAT  
TACTTAGAAAGTCACGGCTAACTACGTG

>6615 len=148 tot-seq=1

GTGCAGAGTTCAGAGTCAGGCTGAGCCCACATCCCTGAAAGAAGGGGCTCTCGGCCAGGG  
CTCCTCCTGCTTTCTCACTGTGGGGATTGATCGGGTTGGGGACCAATTTCCCATTTTCATT  
TTCCTCTAACGCTTCCTCTCCCCCTTCC

>6616 len=148 tot-seq=1

AGGTATGGATAACCTGTGACCGAGCTGTAGCCACTAATATAGACTCCAAAAAGAGGAAAG  
CATTTTACTTCCGACCAAGACTAAGGAAATGAGGATGTGACAAAAAGGGGAAATTTTGAA  
GAAATTTCTTTGGCGCTTCTGTTGCTCT

>6617 len=148 tot-seq=1

GGTTCTTGTTTGGACCCTGCCCTGGGCCATGGCCAGGTGACCATGGCTACATTGCCAAA  
CCTCTGACTGCCACAGCTGCAGACTGAGAGGGTGGGTCTGAGTCCCCACAATGTCTGAAG  
CTGCCCTGGGATTCTCAGGCCAACCTG

>6618 len=148 tot-seq=1

TGAGCCAAGATCGGGCCACTGCACTCAAGCCTGGGCAACAGAGCGAGACTCTGGGTCAGA  
ACAAATGAAAAACCAGCACCAGCATGAAGAGCCTGTGTATTGCCTGGGGTACTTTGCTGC  
CCTTGGGCAGAATCTGCATCCCTCCCAG

>6619 len=148 tot-seq=1

ACAATGGGAGCAAGCCTTATGAAGCAATGCCGCGTGAACGAAGAAGGTCTTAGAGATTGT  
AAAGTTCTTTTATATGAGAAGAAACGCTAAAATAGGAAATGATTTTAGTTTACTGTACC  
ATTTGAATAAGGATCGGCTAACTACGTG

>6620 len=148 tot-seq=1

TGGGGGCTTAGACCAAGGGGAGCTCCGGAGCTTGAAGGTGCACATCCCCACACCCCGCTC  
GTGCCTGTGGGCTCCAGGAAGGTGGGCATCCGGTCACTCTAGCTCTGCATTCCCGTACCT  
CAGCCTGGCGCCTGGCACACAGTGGCTC



>6621 len=148 tot-seq=1

CACAATGGACGAAAGTCTGATGGAGCAACGCCGCGTGAGTGAAGAAGGTTTTCGGCTCGT  
AAAGCTCTGTTGGTAGTGAAGAAGGATAGAAGTAGTAACTGGCCTTTATTTGACGGTAAT  
TACTTAGAAAGTCACGGCTAACTACGTG

>6622 len=148 tot-seq=1

CACAATGGACGAAAGTCTGATGGAGCAACGCCGCGTGAGTGAAGAAGGGTTTTCGGGTCGT  
AAAGCTCTTTTGGTAGTGAAGAAAGATAGAGGGAATAACTGGCCTTTATTTGACGGTAAT  
TACTGAGAAAGTCACGGCTAACTACGTG

>6623 len=148 tot-seq=1

CACAATGGACGAAAGTCTGATGGAGCAACGCCGCGTGAGTGAAGAAGGGTTTTCGGCTCGT  
AAAGCTCTGTTGGTATTTAAGAAAGATAGGGGTAGTAACTGGCCTTTATTTGACGGTAAT  
TACTTAGAAAGTCACGGCTAACTACGTG

>6624 len=149 tot-seq=1

GTGACAACCAAAGAATGGAGAAATTGGAGAAAACCAACAGCAGCTTGCGCAAACAGAACC  
GTGACCTCCTGGAGCAGTTGCAGGTAGAGCATATTTGCCGAGCGGCTCCCGAGCCTCTG  
TGTAGTCGCTCATTAACTACCAAAGGCA

>6625 len=149 tot-seq=1

ACGGGAGGCAGCAGGGGGGAATATGGCAAAAGGGGGGAAACCAGGAGGCAGCGACGACGA  
GGGAGAGAAGAAGGAGGTCGGTATGGAAAGCTCTAGCAGAAGGGAAGAAAATGAAGGGAC  
CTGACTAAGAAGACCCGGCTAAATACGTG

>6626 len=149 tot-seq=1

ACGGGAGGCAGCAGGGGGGAATATGGCAAAAGGGGGGAAACCAGGAGGCAGCGACGACGA  
GGGGGGGAGGAAGGAAGTCGGTATGGAAAGCCCTAGCAGAAGGGAAGAAAATGAAGGGAC  
CTGACTAAGAAGACCCGGCTAACTACGTG

>6627 len=149 tot-seq=1

ACTGTTCCCAATTATTCCTGATTGGTCAACTAAAAAGCTGATTAACCAATGACTAAGC  
AGGGGAGAGAATAGAGCTAGATTCCTCCTAGTCAGGGGAATGGAGAAAGGCGAGAAGAG  
GAAGTTGGGATTCCCCTTGGGGAGAAAGA

>6628 len=149 tot-seq=1

CAGCAGCAGCAGCAGCAGCAGCAGCAGCAGCAGCAGCATCACCACCACCAGCAGCAGCAGCAGCAG  
CATCACCACCACCATCACCACCACCACCATCACCAGCAGCAGCAGCAGCAGCAGCAGCAGCAGCAG  
CAGCATCACCACCACCATCACCACCATCA

>6629 len=149 tot-seq=1

CTGTCCACACCAGGCACTGTGTGGTATTTGGTCACTAGTGCCTGCCCTGCCAGGACCATG  
TGCTGGGTGGAGGTAAAGGTATCCTCAGTCAGGCTTGGCGGCAGAGCCTGAATGAGGGAC  
TGAGAAACATGGTCCTCCGCTCAGCAGCC

>6630 len=149 tot-seq=1

TGGGAATCTTCGCAATGGGCGAAAGCCTGACGGAGCAACGCCGCTGAGTGATGACGG  
CCTTCGGGTTGTAAAGCTCTGTGATCGGGGACGAACGGACAGGAAGCTAATAACTTCCTG  
TAGTGACGGTACCCGAATAGCAAGCCACG

>6631 len=149 tot-seq=1

ACGGGAGGCAGCAGTGGGAATATTGCAAATGGGCGAAAGCATGATGCAGCGACGACGA  
GTGAGAGAAGAAGTATTTCCGGTATGCAAAGCTCTATCAGAAGGGAAGAAAATGAAGGTAC  
CTTACTAAGAAGATCCGGCTAAATACGTG

>6632 len=149 tot-seq=1

TGGGAATATTGCGCAATGGGGGAAACCCTGACGCAGCGACGCCGCTGAGTGAAGAAGT  
ATTTCCGGTATGTAAAGCTCTATCAGCAGGGAAGAAAGGCTCGTAAGAGAGATGATGGTAC  
CTGACTAAGAAGCCCCGGCTAACTACGTG

>6633 len=149 tot-seq=1

CCACAATGGACGCAAGTCTGATGGAGCAACGCCGCTGAGTGAAGAAGGTCTTCGGATCG  
TAAACTATGTTGTTAGAGAAGAAAAAGAGTAAGAGTAAATGTTAATTCGATGACGGTAT  
CTAACCAGCAAGTCACGGCTAACTACGTG

>6634 len=149 tot-seq=1

CCACAATGGACGCAAGTCTGATGGAGCAACGCCGCTGAGTGAAGAAGGGTTTCGGCTCG  
TAAAGCTCTGTTGTTAAAGAAGAACGTGAGGAAGAGTAACTGATTACCGTGTGACGGTAT  
TTAACCAGAAAGCCACGGCTAACTACGTG

>6635 len=149 tot-seq=1

CGCAATGGACGAAAGTCTGACGGAGCAACGCCGCTGAGGGAGGACGGCCTTCGGGTTGT

AAAGCTCTGTTAATCGGGACGAATGGTCCTTGTGGGAATAATGCAAGGATTTGACGGTAC  
CGGAATAGAAAGCCACGGCTAACTACGTG

>6636 len=149 tot-seq=1

CCGCAATGGGCGAAAGCCTGACGGAGCAACGCCGCGTGAGTGATGAAGGTCTTCGGATCG  
TAAACTCTGTTATTAGGGAAGAACATACGTGCAAGTAACTAGGCACGTCTTGACGGTAC  
TTAATCAGAAAGCCACGGCTAACTACGTG

>6637 len=149 tot-seq=1

CCACAATGGACGAAAGTCTGATGGAGCAACACCGCGTGAGTGAAGAAGGTTTTTCGGATCG  
TAAAGCTCTGTTGTTGGTGAAGAGGGATAGAGGTAGTAACTGGCCTTTATTTGCCGGTAA  
TCAACCAGAAAGTCACGGCTAACTACGTG

>6638 len=149 tot-seq=1

TAGGGAATCTTCCACAATGGACGCAAGTCTGATGGAGCAACGAAGAAGGTTTTTCGGATCG  
TAAAGCTCTGTTGTTGGTGAAGAAGGATAGAGGTAGTAACTGGCCTTTATTTGACGGTAA  
TCAACCAGAAAGTCACGGCTAACTACATG

>6639 len=149 tot-seq=1

CCGCAATGGACGAAAGTCTGACGGAGCAACGCCGCGTGAGTGAAGACGGCCTTCGGGTGG  
TAAAGCTCTGTGATTCGGGACGAAAGGCCATATGGGAAGAAGATATGGAAATGACGGTAC  
CGAAAAAGCAAGCCACGGCTAACTACGTG

>6640 len=149 tot-seq=1

CCACAATGGACGCAAGTCTGATGGAGCAACGCCGCGTGAGTGAAGAAGGGTTTTTCGGCTCG  
TAAAGATATGTTGGTAGTGAAGAAAGATAGAGGTAGTAAATGGAATTTATTTGACGGTAA  
TTACTTAGAAAGTCACGGCTAACTACGTG

>6641 len=149 tot-seq=1

TGGGGAATATTGCACAATGGGGGCAACCCTGATGCAGCAACGCCGCGTGAGTGAAGAAGT  
ATTCGGCATGTAAAGCTCAGTTGTTGGTGAAGAAGGACAGGGGTAGTAACTGACCTTTG  
TTTGACGGTAATCAATTAGAAAGTCACGG

>6642 len=149 tot-seq=1

TGGAGGAGGTAGCAAGAGAGATAGCCATGTGAGGATGCAAGGGAAAGGCATCCAGGAAGA  
GGGAACAGCATGTGCAAAGATCCTGCGGCACTGAGGCCAGGGGACGGAGCAGAAGAGGAA

CGGGGTTTGATGGTTGATAAAACATCCCC

>6643 len=149 tot-seq=1

AGTATCCCGTTCTAGAGGTCCTAGAGGGCATTGGGGCTCACCAGAGAATCCAGGGTGCA  
GACTGGAGGCTTGGACTGACAGATGAAGTTGTGGA ACTCTGGAAAACAAGAGCTTGAGGG  
GCCGGGCGCAGTGGCTCACGCCTGTAATC

>6644 len=149 tot-seq=1

TTTTTTTTTTCAAGCAGAAGACGGCATA CGAGATAACACTGTGACTGGAGTTCAGACTGT  
GCTCTTCCGATCTCCACGGGAGGCAGCAGCCTGGGTTCTGACAAGTCTGCCAGCAAGCTC  
CTATGCATCTCAAGTCCGGGAACCATGCA

>6645 len=149 tot-seq=1

CCAATCAGAGGTGAAGCTTTCATCCTGGGGTCTCATGCAGCCCCAGATCCTTCCACC  
ATTTAAAATATGGAGATATCTATAAAGTTCGGATTTACACCTTCTTCTGAGAACTGAGA  
GACCTTCAACACAGGCTCACCATGGTG

>6646 len=149 tot-seq=1

TGGGGGATATTGCACAATGGAGGAACTCTGATGCAACGACGCCGCGTGAGTGAAGAAGT  
ATTCGGTATGTAAAGCTCTATCAGCAGGGAAGAAAGGCTCGCAAGAGAGATGACGGTAC  
CTGAGTAAGAAGCTCCGGCTAAATACGTG

>6647 len=149 tot-seq=1

CTCCATTTGTTATCCAGTGCTTTGAATTTTAGGATCTCAGCTCACATGAGTGAAGCTGAT  
ATTTTGTCTGGCTTCCAGGGAGTCTCCAGCGGTGACTCCTTCTGGGTTGTGTGACC  
AATAACCCGGTCCAGCTCACCATTCCTA

>6648 len=149 tot-seq=1

TCAAGCAGAAGACGGCATA CGAGATTTGACTGTGACTGGAGTTCAGACGTGGCTCTTCCG  
ATCTCTACGGGAGGAAGCAGGCCAGGAACCTGGGCTGGGACTAATTATTGCTGAAGAGA  
GAACAGGGCCAAGTGTCCCTCATGTCCCC

>6649 len=149 tot-seq=1

CGGGAGGCAGCAGGCGCAAATTACCCACTCCCGACCCGGGGAGGTAGTGACGAAAAAT  
AACAATACAGGACTCTGTGAGGCCCTGTAATTGGAATGAGTCCACTTTAAGGCCTGTAA  
CGAGGATCCATTGGAGGGCAAGTCTGGTG

>6650 len=149 tot-seq=1

GGGAAGGAAGTGCTCCTTGCCCCCACCATGTGCAGACAAGTGGAGGAGGCAGTGGAGT  
CTTAGGAGCGGGGCTGCCACCTGCTAAAGGATGAGAGAGGTTCAAGAGGAGGGGGTTCA  
GGGAATTGGGATGGCAGGGGGCATCAGGC

>6651 len=149 tot-seq=1

CGGGAGGCAGCAGGCGCGCAAATTACCCACTCCCGACCCGGGGAGGTAGTGACGAAAAAT  
AGCAATTCAGGACTCTGTGAGTCCCTGTAATTGGAATGAGTCCACTTTAAATCCGGTAA  
CGAGGATCCATTGGAGGGCAAGTCTGGTG

>6652 len=149 tot-seq=1

TGCTGTGTTGTTCTCTCCAGACCGAATAGGACTGTCCTGTGTAATCACTAGGATATTGT  
GGAAATTTAAAAGTGTGACTTTGAAGGCGAGGTTATAAAAGACGTGGTGGTTTTCATTTT  
GCCATCTTGGATTACATGCTCTGAGGATG

>6653 len=149 tot-seq=1

CCGCAAAACAACAACCAGCCAAATGTAATACTGCCATTGCCGGCTGATTTTGTTTTGCAA  
ACACTGTTTTCCAAAAGTAAAGCCAGAATAAGTAACTGCCGGAAAAAGACATGGACAG  
GAAAATCTTCAAAACTGTGTTTCATTGCTG

>6654 len=149 tot-seq=1

TAGGGAATCTTCGGCAATGGGGGCAACCCTGACCGAGCAACGCCGCGTGAGTGAAGAAGG  
TTTTCGGATCGTAAAGCTCTGTTGTAAGAGAAGAACGTGTGTGAGAGTGGAAGTTCACA  
CAGTGACGGTAACTTACCAGACAGAACTA

>6655 len=149 tot-seq=1

AACAGCACTCAGGACCCCATCACTTTAATACAACCTGCGGTTGCGTCACATGGTTTCTGTG  
CTGGCATGTTTCATCTCCTCACCTCCTGCATGTGGCTGAGTGGCTTTGGTGCCCGGGAGG  
CATCCCTCCCATCCTCTCACAGCCTGGCC

>6656 len=150 tot-seq=1

TACGGGAGGCAGCAGTGGGGAATATTGCACAAGGGGGGAAACCCGGATGCAGCGACGCCG  
CGGGAGGGAAGAAGTATTTCCGGTATGTAAAGCTCTATCAGCAGGGAAGAAAATGACGGGA  
CCTGATTAAGAAGCCCCGGCTAACTACGTG

>6657 len=150 tot-seq=1

TCATTTTACTTACTGAGCCATCTTTCTGGCTCCAAAAGAAGGAATTTGATCCTTTGGTT  
TTGGTGTTTATAGGGTTGCTCATCCCCAATGGTGGTAAAGTTTGCCGACACCCAGAAGGA  
CAAAGAACAGAAGAGAATGGCCCAGCAGCT

>6658 len=150 tot-seq=1

TGGGGGATATTGCACAATGGGGGAAACCCTGATGCAGCGATGCCGCGTGAGGGATGAAGG  
TTCTATGGATCGTAAACCTCTTTTATAAGGGAATAAAGTGCGGGACGTGTCCTGTTTTGT  
ATGTACCTTATGAATAAGGATCGGCTAACT

>6659 len=150 tot-seq=1

CTGGAGTGAGTAGGTGCATGTGTTGTGTCTCCCCAGGAACAGTTTTGTCACACAACACAC  
TGCTAGAATGTGCATGGATGTAGGACCATCTACTTGATCATGGGTAACCTCCAAAGGACA  
GCATCCTTGAAAAAAGCTGACTCTCTCTCT

>6660 len=150 tot-seq=1

AACAGAGCAGAGACTGAAGGAAAGGCTATCCAGAGACCTGCTTAACTTGGGATCTATCCC  
AAGTGCAGGCACCAAACCCGGACTGTTATTCATGCCATGTTGTACTTGCAGACAGGAG  
CCTGGCATGACTGTACTTTGAAAGGTTCTA

>6661 len=150 tot-seq=1

TGGGGGATATTGCACAATGGGCGCAAGCCTGATGCAGCGACGCCGCGTGGGGGATGAAGG  
CCTTCGGGTTGTAAACTCCTTTTGCTCTGAACAAGGCGCACTATTGGGTGTGTTGAGTGT  
AGGGGTTGATTAGCGCCGGCTAACTACGTG

>6662 len=150 tot-seq=1

AACACAGGAGAGGGCGGAGACGCAGTGCTCACTTGCCACCTGACAGAGGCACACACGTGC  
ACACAGAGTCACAGGCAGAGAGAGGCATCGCACACTCAGCCTGTGAGCCACACGCATCAG  
AACCACCCGGAACACACACACATACCTACT

>6663 len=150 tot-seq=1

TGGGGAATTTTGCACAATGGAGGAAACTCTGATGCAGCGACGCCGCGTGAGTGAAGAAGG  
GTTTCGGCTCGTAAAGCTCTGTTGTTGGTGAAGAAGGACAGGGGTAGTAACTGACCTTTG  
TTTGACGGTAATCAATTAGAAAGTCACGGC

>6664 len=150 tot-seq=1

CTACGGGAGGCAGCAGTGGGGAATGTTGCACAATGGGGGAAACCATGATGCAGCGACGCC

GCGTGATTTAGAAGGCCTTCGGGTTGTAAAAATATGTTGGATGGGAAGAAAATGACAGTA  
CCATACGAATAAGGACCGGCTAATTACATG

>6665 len=150 tot-seq=1

AATCTTCCACAATGGACGCAAGTCTGATGGAGCAACGCCGCGTGAGTGAAGAAGGGTTTC  
GGCTCGTAAAGCTCTGTTGTTGGTGAAGAAGGGGTAGTGACTGACCTTTGTTTGATGGTA  
ATCAATTAGAAAGTCACGGCTAACTACGTG

>6666 len=150 tot-seq=1

TAGGGAATCTTCGGCAATGGACGGAAGTCTGACCGAGCAACGCCGCGTGAGTGAAGAAGG  
TTTTCGGATCGTAAACTCTGTTATTAGGGAAGAACATATGTGTAAGTAACTGTGCACAT  
CTTGGCGGTACCTAATCAGAAAGCCACGGC

>6667 len=150 tot-seq=1

CCCTGGAGGCAGCATCTCTTTGGTGTGGACACCCTTGGACACATGGGCTCTCACCCCGGG  
AGGCCTGGGACAGTCTGCCCCCTCATCTCTCCTTGGCTCATGGCCTCTCCTTCCCCTC  
TGTAGGACTTCCCGCACATCTCTGAGTTCC

>6668 len=150 tot-seq=1

AATAACACTGAACATCTATGATGTATCAGGCACCATTCTATGTGCTTTACATGTATCACA  
TTATTTAACATAGCAATCCTGTGAGAGGTTCTAGTGCCATCCTCAGCACTTTTGCTGACT  
CCAGGCTTCTTGCTTTGGAGGCAGTGATGT

>6669 len=150 tot-seq=1

GGTGAAGAGGGAGGAGACTGGAGCTTGTGTGTGAGGGTGGCTGGGGACCTGACGGGGGGC  
GGCACAGGCCGAGAGGCCACCAGCTGCACCCCCTCCTTTGCCCCGAGACTGTGGGTGCTC  
CAGGCAGAGACAGCCCCGATGGGACTCATG

>6670 len=150 tot-seq=1

AATTTTCGGCAATGGGGGAAACCCTGACCGAGCAACGCCGCGTGAGTGATGACGGCCTTC  
GGGTTGTAAAGCTCTGTTGTAAGAAAGGATAAATTAGTAGAGAATATTAGTCAGACATTA  
TCTTACCAGAAAGCCACGGCTAACTACGTG

>6671 len=150 tot-seq=1

TCCACAATGGACGAAAGTCTGATGGAGCAACGCCGCGTGAGTGAAGAAGGGTTGCGTCTC  
GTAAAGCTCTGTTGGTAGTGAAGAAAGATAGAGGTAGTAACTGGCCTTGATTTGACGGTA

ATTAATTAGAAAGTCACGGCTAACTACGTG

>6672 len=150 tot-seq=1

TCCACAATGGACGAAAGTCTGATGGAACGACGCCGCGTGAGTGAAGAAGGTTTTCGGCTC  
GTAAAGCTCTGTTGGTAGTGAAGAAAGATAGAGGTAGTAACTGGCCCTTATTTGACGGTA  
ATTACTTAGAAAGTCACGGCTAACTACGTG

>6673 len=150 tot-seq=1

CTCCACAATGGACGAAAGTCTGATGGAGCAACGCCGCTTGAGTGAAGAAGGGTTTTCGGCT  
CCTAAAGCTCCGTTGGTAGTGAATAAAGATAGAGGTAGTAACTGGCCTTTATTTGACGGT  
AATTACTTAGAAAGTCACGGCTAACTACGT

>6674 len=151 tot-seq=1

TGGGGAATATTGGACAATGGGCGCAAGCCTGATCCAGCCATGCCGCGTGAGTGATGAAGG  
CCTTAGGGTTGTAAACTGCTTTTGTGGGAATAATCGACATTACGTGTAATGTTTTGCA  
TGTACCATTGAATAAGGACCGGCTAATTC

>6675 len=151 tot-seq=1

ACAGGGCCTTGTTGAGATTGAGCTGCCCTGTAGCATCACAGGCAGAAAACGCAGAGGAGA  
TCCTCTGTAAATGCAGAGAGGAAATGCAGCAAGGTGTCAGACTGCACCTGAGGCTTAGGA  
GGCAGCCTGCAGAGGACTGACAATGGACAAA

>6676 len=151 tot-seq=1

TGAGGAATCTTGGTCAATGGACGAGAGTCTGAACCAGCCACGTCGCGTGCAGGATGACGG  
CCCTCTGGGCTGTAAACTGCTTTTATAAGGGAATAAAGTGAGTCTCGTGAGACTTTTTGC  
ATGTACCTTATGAATAAGGACCGGCTAATTC

>6677 len=151 tot-seq=1

TGGGGAATATTGCACAATGGGGGAAACCCTGATGCAGCGACGCCGCGTGAGTGAAGAAGT  
ATTTCCGGTATGTAAAGCTCTATCAGCAGGGAAGAAAAGAACCAAGGTTCTTCGGACGGT  
ACCTGAGTAAGAAGCCCCGGCTAACTACGTG

>6678 len=151 tot-seq=1

CAAACCCAGGTAAGTCTAATGCCTGCCCCAGCTCTGAGGTCCAAGTGTGTGCCTATCTC  
ACCTGGAAGACACCCTGGGCATCGGCTGTGACAGCTGTGTGCAGGGGAGTGCGGCCTGAG  
TGGTCCTGGGCATTGGTGTCTGCCCCAGCAT



>6679 len=151 tot-seq=1

GGACACAAGGGAAGAAAGGAGGAGGGAGAAACGACGAGGGAGGGAAGAAGGGGGGAGGAG  
AGGAAAGCGCGGGGGGGGGGGAAGAAGGAGAGAGGGAGGAACGGGCCTTGATTTGACGGT  
AATCAACCAGAAAGTCACGGCTAACGACGTG

>6680 len=151 tot-seq=1

CTTCCTTTCTATCCCCATTCTCATCCCCTCCCTCTTTTCCAAGACCAGAGCCAGAAGAGG  
GCAGGATTGAGAGGACAACCTCACACAGGATACTCCCTACTGGTCCACCTATGCACCTTT  
GGAGTCTGGCTCTCTGTCCTGCTCAGAGGTA

>6681 len=151 tot-seq=1

AGAAGACTGCAGACTTCCTGGCAGTCCTTGAAGGCATTGACTGTGACTGAGTGAGGAA  
GGGTCCGGAGTGGGGAACGGGGGTGATCCGCCTCAGATGGAACAGGGAACCCTCCAGCCA  
CCGGGTGGAGAAACGGACCATGAAGTCAAAG

>6682 len=151 tot-seq=1

TGGGGAATATTGGGCAATGGGCGAAAGCCTGACCCAGCAACGCCGCGTGAGTGATGAAGG  
CCTTCGGGTTGTAAACTGCTTTTGTGGGAATAATCGACATTACGTGTAGTGTTTTGCA  
TGTACCATTGAATAAGGACCGGCTAATTC

>6683 len=151 tot-seq=1

GAAAATAAATTAGGTTTGCCTTAGGCCTCACAAATCATTGCGGACCACTCAGAGGCTGTAA  
CTTCAGGCCTGGTTTGTCTGATGGGGTCATGCTCTTTGTGACTGGTAATGAGCTGGACAA  
CTGCCCCACTTAACTCAAGAGGCCACCAGCA

>6684 len=151 tot-seq=1

TTTTTTTTTTCAAGCAGAAGACGGCATAACGAGATCCAACCGTGACGGGAGTTCAGACGTG  
TGCTCTCCGATCTCCTAGGAGGCAGCAGACACCAGGCCTACATGGACCACCTGAAGATA  
TTTTCGAACATGAAATCAACAGTCCCTCAAC

>6685 len=151 tot-seq=1

TGGGGAATATTGCACAATGGGCGCAAGCCTGATGCAGCGACGCCGCGTGAGGGATGAAGG  
CCTTCGGGTTGTAAACCTCTTTAGTAGGGAAGAAGCCTGTCTTTGGGTGGGTGACGGT  
ACCTGCAGAAGAAGCGCCGGCTAACTACGTG

>6686 len=151 tot-seq=1

TGGGGAATATTGGACAATGGGCGGAAGCCTGATCCAGCAACGCCGCGTGAGGGATGACGG  
CCTTCGGGTTGTAAACCTCTTTTCATTACCGACGAAGCTCAGTGTTGATCTGGGTGACGGT  
AGGTGGAGAAGAAGCACCGGCCAACTACGTG

>6687 len=152 tot-seq=1

TGAGGAATATTGCGCAATGGAGGAACTCTGACGCAGCGACGCCGCGTGAAGGATGAAGG  
CCCTCTGGGTTGTAACTTCTGTAGAGAGGGAAGAATTTCTCGCTCCGCGAGGTTGACGG  
TACCTCTAAAGTAAGGGTCGGCTAACTACGTG

>6688 len=152 tot-seq=1

GTTGTTTGTTTTTTATTTCTCAAGACAGGGTTTCTCCGTGTAGCCCTGGCTGTGCTGGAA  
CTCACTCTGTAGTCCAGGCTGGCCTTGTACTCACAGAGATCTGCCTTCCTCCCCTTCCCA  
AGTGCTGGGATTAAAGGCATGCGCCCTCATGT

>6689 len=152 tot-seq=1

TGGGGAATATTGCACAATGGGGGAAACCCTGATGCAGCGACGCCGCGTGAAGGATGAAGT  
ATTTCCGGTATGTAAAGCTCTATCAGCAGGGAAGAAAAAAGTCCACAGGACTTTGGACGG  
TACCTGACTAAGAAGCCCCGGCTAACTACGTG

>6690 len=152 tot-seq=1

TCTCCTGTCCCTCTTGCTTACTCTTAGCCATAAATTTCCATGTTCTGAGCTGCCCTAAG  
GAGATTCTCAGGTGATAATGAACTGAGGGCTGTGAGGAAGGGAGCACAGCCAGCAGCCAG  
GGAGAAGCTGAGACCTGCAGACCCTCATGATT

>6691 len=152 tot-seq=1

CTTCTATGAGTGCATCCCTAACTGATCCTCAGCTCACAGGAAAATGAGCATCCCCATCCA  
TTGGCCTCTAGCATAAACCCAGGACCCTTTCCCTCCATCGTCATTCATGAAAACCTCCAAG  
CCCCTACCCCGTCAATAAAAGAGTTTGTCAAT

>6692 len=152 tot-seq=1

GGAATCTTCCACAATGGACGCAAGTCTGAACCAGCCAAGTAGCGTGAAGGATGACTGCC  
TATGGGTTGTAACTTCTTTTATACGGGAATAAAGTGAGGCACGTGTGCCTTTTTGTATG  
TACCGTATGAATAAGGATCGGCTAACTCCGTG

>6693 len=152 tot-seq=1

TGGGGAATCTTGCAGCAATGGTCTGACGACTGACGCAGCGACGCCGCGTGTGGGAGGACGC

CCTTCGGGGTGTAACCACTGTTGCCCGGGACGAACCGCTGGTTTTCGACCAGCCTGACGG  
TACCGGGTGAGGAAGCACCGGCTAACTCCGTG

>6694 len=152 tot-seq=1

CGCAAGCCTGATGGAGCAACGCCGCGTGAGTGAAGAAGGGTTTTCGGCTCGTAAAGCTCTG  
TTGTTGGAGAAGAACGTGTGTGAGAGTAACTGTTACGCAGCGACGGTAACCACCCAGAA  
AGTCACGGCTAACTACGTGGTAAAGCTCTGTT

>6695 len=152 tot-seq=1

GCAACTGCAAAAGCCACAGGATAAAGAAAAGTAGCAACGACGATAAGTACAGAACTGAGGT  
TTGTACCGAACGCCAGCGAACCAAGCAGATCTTTCATCTTCGCATTCTCTTTGGTACGGA  
CGGCGAAGATACCTATAATAGAAAGGATAATC

>6696 len=152 tot-seq=1

CACAATCATCCTGATATCATATATGTCAGTCATGAAAAGCCCAACAACATATCGGTTGAC  
GACATAAGGACACAGCTCAACAACGATATAGTGATAAAGCCGTACAGCAGTAAATACAAG  
ATTTACATAGTGGATGAGGCTGAAAAAATGAA

>6697 len=152 tot-seq=1

TGGGGGATATTGCACAATGGACGCAAGTCTGATGCAGCGACGTCGTGTGGGGGATGAAGG  
CCTTCGGGTTGTAAACTCCTTTCGCCTGCGGAAAAGGCAGGGTTTTGGCCTTGTTGATGG  
TAATCAATTAGAAAGTCACGGCTAACTACGTG

>6698 len=152 tot-seq=1

TGGGGAATATTGCACAATGGGCGCAAGCCTGATGCAGCGACGCCGCGTGGGGGATGACGG  
CCTTCGGGTTGTAAACCTCTTTCAGCCTCGACGAAGCTGCGGGTTTTCTCGTGGTGACGG  
TAGGGGCAGAAGAAGCACCGGCCAACTACATG

>6699 len=152 tot-seq=1

TGGGGGATATTGCACAATGGAGGAACTCTGATGCAGCGACGCCGCGTGAGTGAAGAAGG  
TTTTCGGATCGTAAAGCTCTGTTGTAAGAGAAGAACGTGTGTGAGAGTGGAAAGTTCACA  
CAGTGACGGTAACTTACCAGAAAGGGACGGCT

>6700 len=152 tot-seq=1

TGAGGAATATTGGTCAATGGACGAGAGAATGCAGCCAAGTAGCGTGCAGGATGACGGCCC  
TATGGGTTGTAAACTGCTTTTATAAGGGAATAAAGTGAGTCTCGTGAGACTTTTTGCATG

TACCTTATGAATAAGGACCGGCTAATTCCGTG

>6701 len=152 tot-seq=1

TGAACAGGTTGAGGGAGGCCAGGCCACTGGGCAGCGTCACATCGGCTGTGAAGAGATAGG  
CCTGTGTGGGGTGAGTAGTCCTAGCCCTTCTCCCCTGCCAATCACATCTCCCGGTGCC  
AGCCATGAAATTAACCTGGTGACATTTCCAGC

>6702 len=152 tot-seq=1

TAGGGAATATTGCACAATGGGGGAAACCCTGATGCAGCCATGCCGCGTGTGTGAAGAAGG  
GTTTCGGCTCGTAAAGCTCTGTTGTTGGTGAAGAAGGACAGGGGTAGTAACTGACCTTTG  
TTTGACGGTAATCAATTAGAAAGTCACGGCTA

>6703 len=152 tot-seq=1

GAGGGGCTCGGCGTTGCAGGAGATTGAGGCTGAGGGAGCTTGAGGGAGATGAAGGGGGCA  
GCTCAGAAGCCCAGAGGGACCTGAGGGCTCTGGGGAAGCAGAGGGGAAAGGAGCCAGTAG  
AACGGACAGGACGAGGCCAGGCAGAGCTGGGA

>6704 len=152 tot-seq=1

TGGGGAATATTGCACAATGGGGGAAACCCTGATGCAGCGACGCCGCGTGAGTGAAGAAGT  
ATTCGGTACGTAAAGCTCTATCAGCAGGGAAGAAAAAAGTCCTTTGGACTTTGGACGG  
TACCTGACCAGAAAGGGACGGCTAACTACGTG

>6705 len=152 tot-seq=1

TGAGGAATATTGGTCAATGGACGCAAGTCTGAACCAGCCAAGTAGCGTGCAGGGTGTAGG  
CCTTCGGGTTGTGAACTCCTTTTTCTCGCGAAAAAGGCACAGTTTTGGCTGTGTTGATGG  
TAGTGGGGGAAGAAGCGCCGGCTAACTACGTG

>6706 len=152 tot-seq=1

TGAGGAATATTGGTCAATGGGCGAGAGCCTGAACCAGCCAAGTCGCGTGAAGGATGACTG  
TCTTATGGATTGTAACTTCTTTTGTAGGGGAATAACGGACGGCACGTGTGCCGTAGTGA  
ATGTACCCTACGAATAAGCATCGGCTAACTCC

>6707 len=152 tot-seq=1

TGGGGAATATTGCGCAATGGACGAAAGTCTGACGCAGCGACGCCGCGTGTGGGATGAAGC  
CTTTCGGGGTGTAAACCACTGTTGCCCGGGACGAAACTCCTTTTTCGAGAGGATTGACGG  
TACCGGGTGAGGAGGCACCGGCTAACTCTGTG

>6708 len=152 tot-seq=1

ACAGGGGTTCTGAGGAAGGCAAGGGGACTGGGTGTTTGAAATCAGGATGGTCTCAGCCGA  
TCCAGACTATTAGGTGGCTGTGTGCTTATCATTGTTTAGGAAGCAATCCTTGTACCCCA  
GGTCATGCATGTTGCTGGAATCTCTGTCCACA

>6709 len=152 tot-seq=1

TAGGGAATCTTCCACGATGGACGCAAGTCTGATGGAGCAACGCCGCGTGAGTGAAGAAGG  
TCTTCGGATCGTAAACTCTGTTGTTAGAGAAGAACGGAAGAGCGTCGTGTAGGGAAAGA  
GTGTGCCAATGTGTAGATCTCGGTGGTCGCCG

>6710 len=152 tot-seq=1

GAAAATACTTACGGGATGATTAAGGAGTCTTGCCAGATGTACCGGAGGATGCCGTTATG  
TATCTGGTCAGTACCACTGCATTGGATGCGAGATGGAGCGAGGTTACTATACTTCTTCG  
CAGGGGAACCTTACGAAAGAAGATGGAACGGT

>6711 len=152 tot-seq=1

CCGCTTGTTGTTGCGCTTACTCAGGCGAAGGGCTTGAGTATTGTGCATGAAACGGTTTAC  
GAGAATCGTTTTGTTTTCACTAAGCCTCTTGTTCAAATGGGCGCTATGGTTCAGCTGTAT  
CGTGAGTGCTTGGGTTCTCTTCCTTGCCGCTT

>6712 len=152 tot-seq=1

GGAATATTGGTCAATGGACGCAAGTCTGAACCAGCCATGCCGCGTGCAGGATGACGGCTC  
TATGAGTTGTAAACTGCTTTTGTATGAGGGTAAAATCGGGTACGTGTACCTGACTGAAAG  
TAGCATAACGAATAAGGAGCGGCTAACTCCGTG

>6713 len=152 tot-seq=1

TGGGGAATATTGCACAATGGAGGGAACCTCTGATGCAGCGACGCCGCGTGAGTGAAGAAGT  
ATTCGGTATGTAAAGCTCTATCAGTAGGGAAGATAATGACGGTACCTACATAAGAAGAT  
CGGAAGAGCGTCGTGTAGGGAAGAGTGTGCCA

>6714 len=152 tot-seq=1

GCAAGAGCGGGGTGATGAGTTTGTGTTTGGATGTGGTGAATTGGAGGAGCCGTCAGGC  
CATTACCAGCACCGCGTAATGACAAGATCGGAAGAGCGTCGTGTAGGGAAAGAGCGTGC  
CAATGTGTAGATCTCGGTGGTCGCCGTATCAT

>6715 len=152 tot-seq=1

TGGGGAATATTGCGCAATGGGGGAAACCCTGACGCAGCGACGCAGCGTGCAGGATGACGG  
CCCTATGGGTTGTAACTGCTTTTGTGGGGAATAACTGACATTACGTGTAATGTTTTGC  
ATGTACCCTTCGAATAAGGACCGGCTAATTCC

>6716 len=152 tot-seq=1

TGGGGAATTTTGGACAATGGGGGCAACCCTGATCCAGCCATGCCGCGTGCAGGGTGTAGG  
CCTTCGGGTTGTGAACTCCTTTTTCTCGGAAAAAGGCACAGTTTTGGCTGTGTTGATGG  
TAGTGGGGGAAGAAGCGCCGGCTAACTACGTG

>6717 len=152 tot-seq=1

TGAGGAATATTCCACAATGGGCGAAAGCCTGATGGAGCAATGCCGCGTGCAGGATGAAGG  
CCTTCGGGTTGTGAACTCCTTTTTCTCGTAAAAAGGCATGCTTTTGGGTGTGTTGATGG  
TAGCGGGGGAAGAAGCGCCGGCTAACTACGTG

>6718 len=152 tot-seq=1

TGGGGAATCTCCGCAATGGACGAAAGTCTGAACCAGCCAAGTAGCGTGCAGGATGACGG  
CCCTATGGGTTGTAACTGCTTTTATGCGGGGATAAAGTGC GCGACGTGTCGCGCATTGC  
AGGTACCGCATGAATAAGGACCGGCTAATTCC

>6719 len=152 tot-seq=1

CCTGTAGGTAATATCTGTCTCTTCATCACTGCTTCTAAAAGATGGCCCCAAAAGTTC  
AGTCTCTGTAAAATGTGTTCTAAATTAGTGGCCCCTTAGGGATTCTGGGGCTATTTCCCC  
TAGACAGAGGTCAAGGGACTGGCTGGACTGGT

>6720 len=152 tot-seq=1

ATATCATTGTGACCATGGGGCATTGAGGCTACCAAGCCCAGGAGGGATCGAGTACACAGA  
CTGCGGATTGTGGCTCCCAAGAGGAAATAGCATGCTTTACCGAAAGGAGTGACAACAGA  
TGCTGAGAGTCCAAGACCAGCATGCACCTGCC

>6721 len=152 tot-seq=1

TGAGGAATATTGCGCAATGGGCGAAAGCCTGACGCAGCGACGCCGCGTGGGGGATGAAGG  
TCTTCGGATTGTAAACCCCTTTCGGGAGGGAAGACGGTTGCATACAAGTGCAACGGACGG  
TACCTCCAGAAGCAGCCACGGCTAACTTCGTG

>6722 len=152 tot-seq=1

TGGGGAATCTCCGCAATGGACGAAAGTCTGACGGAGCAACGCCGCGTGGAGGGTGTAGG

CCTTCGGGTTGTGAACTCCTTTTTCTCGTGAAAAAGGCATGCTTTTGGGTGTGTTGATGG  
TAGCGGGGGAAGAAGCGCCGGCTAACTACGTG

>6723 len=152 tot-seq=1

TGGGGAATATTGCGCAATGGGGGAAACCCTGACGCAGCGACGCCGCGTGGAGGGTGTAGG  
CCTTCGGGTTGTGAACTCCTTTTTCTCGTGAAAAAGGCATGCTTTTGGGTGTGTTGATGG  
TAGCGGGGGAAGAAGCGCCGGCTAATTCCGTG

>6724 len=152 tot-seq=1

TGGGGAATTTGCGACAATGGGCGCAAGCCTGATGCAGCGACGCCGCGTGGAGGATGGAGG  
CCTTCGGGTTGTGAACCTCTTCGCTCATGGTCAAGCCGCGGATGTGTCCGTGGTGAGGG  
TAGTGGGTAAAGAAGCGCCGGCTAACTACGTG

>6725 len=152 tot-seq=1

TGGGGAATATTGCGACAATGGGCGAAAGCCTGATGCAGCGACGCCGCGTGAGTGAAGAAGT  
ATTTCCGGTATGTAAGGCTCTATCAGCAGGGAAGAAATACTGACCTTACGGTCAGCAGACG  
GTACCTGACTAAGAAGCCCCGGCTAACTACGT

>6726 len=152 tot-seq=1

AAAGTCTGATGGAGCAATACCACGTGAACGATGAAGGTCTTCTGAGGGTAAAGTTCTTTA  
GTTTAGGAAAAAAGCGCGCTAGGAAATGAGCGCGCCTTGATGGTACTGATTGAATGAGT  
GACAGATAACTATGTGCCAGCAGCCTGCGGAA

>6727 len=152 tot-seq=1

TGAGGAATATTGGTCAATGGGCGGAAGTTTGATGCAGCGACGCCGCGTGGAGGGTGTAGG  
CCTTCGGGTTGTGAACTCCTTTTTCTCGTGAAAAAGGCATGCTTTTGGGTGTGTTGAAGG  
TAGCGGGGGAAGAAGCGCCGGCTAACTACGTG

>6728 len=153 tot-seq=1

TAGGGAATTTTCGTCAATGGGGGAAACCCTGATGCAGCGACGCCGCGTGAGTGAAGAAGT  
ATTTCCGGTATGTAAGGCTCTATCAGCAGGGAAGAAATAGCGACCTTTGGGTCGCCAGACG  
GTACCTGATTAAGAAGCCCCGGCTAACTACGTG

>6729 len=153 tot-seq=1

TAGGGAATTTTCGTCAATGGGCGCAAGCCTGAACGAGCGATGCCGCGTGAGTGAAGAAGT  
ATTTCCGGTATGTAAGGCTCTATCAGCAGGGAAGAAATAGCGACCTTTGGGTCGCCAGACG

GTACCTGATTAAGAAGCCCCGGCTAACTACGTG

>6730 len=153 tot-seq=1

TGGGGAATTTTGGACAATGGGCGCAAGCCTGATCCAGCCATGCCGCGTGAGTGAAGAAGT

ATTCGGTATGTAAAGCTCTATCAGCAGGGAAGAAATAGCGACCTTTGGGTCGCCAGACG

GTACCTGATTAAGAAGCCCCGGCTAACTACGTG

>6731 len=153 tot-seq=1

CCTTTTTAAAAGGGCAGCTCACTAAAAATACAGCTTAGCTTAAAGAAAGAAAAGACTTGA

GGGCAGAGGTTCTATTCTTTATGAAAACACTGTGCATGAGAGGCCAGAGCCTCTTAG

GGTAGCCACCGCCCTAGAGTGACCAGCGCTCAT

>6732 len=153 tot-seq=1

TCCTGCCCGAATGGTGTACTCTTCCCTTCTTTTGTCTCAGTGCTCACGATAACGACGT

GAAAGAAGCAAACAAGCAGAGGGGACAGTCAGCTCCCCAGTCGACACAGCTGACTGTGTT

CCAGACAGCGCAGCCCTCCCGGCCGGTTCACTT

>6733 len=153 tot-seq=1

TCTCCGCAATGGGCGAAAGCCTGACGGAGCAACGCCGCGTGAGTGATGAAGGTCTTCGG

ATCGTAAAGCACTTTCAGTGAGGAAGAACGCCTGGTGGTTAATACCCATCAGGAAAGACA

TCACTCACAGAAGAAGCACCGGCTAACTCCGTG

>6734 len=153 tot-seq=1

TAATACGGGAGGCAGCAGTGGGGAATATTGCAAATGGGGGAAAAAGTGATGAAGAGAAG

ACGCGTGAGAGAAGAAGTATTTCCGGTATGGAAAGCTCTATCAGCAGGGAAGATAATGACG

GTACCTGACTAAGAAGCCCCGGCTAACTACGTG

>6735 len=153 tot-seq=1

TAGGGAATCTTCCACAATGGACGCAAGTCTGATGGAGCAACGCCGCGTGAGTGAAGAAGG

TCTTCGGATCGTAAACTCTGTTGTTAGAGAAGAACACGAGTGAGAGTAACTGTTTCATTC

GATGACAGTACCATAGAAGAAAGCTCCGGCTAA

>6736 len=153 tot-seq=1

GAGCAGGAAATCAACATATTAAGGAGAAAAATTAATGATCATGGCGATATCTGCTTGT

GGCAGAAACAATGCCATGTGTTCACTAAATTATTTTTCTCTTCTTTTTCTTTTTTTTGT

AGATACACAGTTAAATTACATTTCCCAACCTCC



>6737 len=153 tot-seq=1

TGGGGAATCTCCGCAATGGACGAAAGTCTGACGGAGCAACGCCGCGTGAGGGATGGAGG  
CCTTCGGGTTGTAAACCTCTTTCAGTAAGGGTGAAGGCTCTCTTTGTGGGGGGTTGACA  
GTACTIONGCAGAAGAAGCGCCGGCTAACTACGTG

>6738 len=153 tot-seq=1

TGGGGAATTTTGCACAATGGGGGAAACCTGATGCAGCGTGAGTGAAGAAGGTTTTCGGA  
TCGTAAAGCTCTGTTGTAAGAGAAGAACGAGTGTGAGAGTGGAAAGTTCACACTGTGACG  
GTATCTTATCAGAAAGGGACGGCTAACTACGTG

>6739 len=153 tot-seq=1

TTTTTTTTTTCAAGCAGAAGACGGCATAACGAGATGACTGAGTACTGGAGTTCAGACGTG  
TGCTCTCCGATCGAGGCAGCAGAGACTGAAGGACAATGGGCTTTGGTGGACAACCCAGA  
TATCCCTGCACAGGCAGGGTGTACACA ACTACA

>6740 len=153 tot-seq=1

TGGGGAATATTGCACAATGGGCGCAAGCCTGATGCAGCGACGCCGCGTGGGGGATGAAGG  
CCTTCGGGTTGTAAACTCCTTTCATCATCGACGAAGGGCTCACTTGTGTTGGGTTTGACG  
GTAGGTGGAGAAGAAGCACCGGCTAACTACGTG

>6741 len=153 tot-seq=1

CGGCAGGGTCGAAGGTAATGGAGCCAGACAGGTAATGCAGCGCCAGGTTAAGCCCGGTGC  
TGGCTTTGTTAAGGTCCTGTATCTCTTCGTCTGGTTCGGTACGCCCAAAGGCTTCATCAA  
GGTTTGCAAAAACAATTTCTGGCACCCGCAGGC

>6742 len=153 tot-seq=1

CCTGCCCCGCGCTCTGTGGCCAACTGGGGTCCAATGGCCAAGAGCCATGGGGGATGGGGA  
AGTGCTCAAGGCCAAAGGCTCAAAGGCCAACACGCCAGGCCACAATGCAGTGCCTGGGG  
GCTACAGTGCCACGGCCACCTCACAAGGCCCT

>6743 len=153 tot-seq=1

TACAGGCTGTGTAATAAGTGCCTGGGAATATTCAGGGGGCAGTGATGGCTGAGGGAACT  
CTGCATCTCATCATTAGGAAGAAAAAGAGGCAGCCACCGTGGGAGGAAGAAGCAGTACGC  
AGGAATTGGACAGAAGCCAACCGAGCACTGTCA

>6744 len=153 tot-seq=1

TAATAAGGGAGGAAGAAGTGGGGAATATTGAAAAATGGGGGAAAAAATGATGAAGAAAAG  
CCGAGTGAGTGATGAAGGTTTTTCGGATCATAAAGCTCTGTCGTTTGGGAAGATAATGACG  
GTACCCAAGGAGGAAGCCACGGCTAACTACGTG

>6745 len=153 tot-seq=1

TGGGGAATATTGCGCAATGGGGGAAACCCTGACGCAGCGACGCCGCGTGCGGGATGGAGG  
CCTTCGGGTTGTAAACCGCTTTTGTCCAAGGGCAAGGCGCGGTCTTTGGCCGTGTTGAGT  
GGATTGTTCGAATAAGCACCGGCTAACTACGTG

>6746 len=153 tot-seq=1

CGTACGGATCACAAGGTCAGGAGTTCAAGACCAGCCTGGCCAGCATGGTGAAACCCCATC  
TCTACTAAAATTACCAAAAAATTAGCCGGGCATGGTGGCACGCACCTGTAGTCCTAGCTA  
CTCAGGAGGCTGAGGCAGGAGAACTGCTTGAAC

>6747 len=153 tot-seq=1

GTTCTAAGAGGGAAGTCAATTCAAACAAATATTTCTGCACGCCTTGATGCTGGGCATAA  
ACCAAGTAGAATTATCACATTTACAGAGCTTAATCTAGAAGAAGAGATAAATTAACAA  
GTAAAGAGACAAATAAATAATTGCAAATTGCGT

>6748 len=153 tot-seq=1

TGGGGAATATTGACAATGGGGGAAACCCTGATGCAGCGACGCCGCGTGAGTGAAGAAGC  
ATTTCCGGTGCGTAAAGCTCTGTCAGCGGGGAAGAAAGAGCATCTGAAAGGATGCCGGACG  
GTACCCGACCAAGAAGCCCCGGCTAACTACGTG

>6749 len=153 tot-seq=1

CAGGCGGATCACCTAAGGTCAGGAGTTGAGACCAGCCTGGCCAACATGGTGAAACCCTG  
TCTCTACTAAAATACAAAAATTAGCTGGGCGTGGTGGCAGGCGCCTGTAATCCCAGCTA  
CTTAGGAGGCTGAGGCAGGAGACTCACTTGAAC

>6750 len=153 tot-seq=1

CCCCGCCGCCACCGTCATGGATCAGCCACAGTTCAGCGGGGCGCCCCGCTTTCTACCCG  
GCCAAGGCCTTCGTGGTGTGCGGTGGGCAAGGACGCCACCCTCAGCTGCCAGATCGTGGG  
TAATCCCACGCCACAGGTGAGCTGGGAGAAGGA

>6751 len=153 tot-seq=1

TGAACCAGACAGGTCTCTGCACTCACAGAACTGATATTGCTGTGGGAGAGACAGATGATA

AATACCTCAACCAATAAACAGGGTATTCTGGATAGTGATAGGTGCCAGGAAAAACGTACA  
ACAGGACAACGGCATAGAGCTGTGCCGTCCTAT

>6752 len=153 tot-seq=1

TGGGGAATATTGCACAATGGGGGAAACCCTGATGCAGCAACGCCGCGTGAGTGATGACGG  
CCTTCGGGTTGTAGAGTTCTTCGGTATTGAGGAAGGTTGATGTGTTAATAGCACATCAA  
ATTGACGTTAATAACAGAAGAAGCACCGGCTAA

>6753 len=153 tot-seq=1

CACAGGGGCTCGGGCCCACGCTGGCTGTCCACACCCAGGGCCACGCCTCCATGACGGTGC  
CCTCCACCACATCCCCTCTCGTGTGTGCTGGTGCCACCACGGGGGCCAGGGACCTTTTT  
GCTCTACTTCTCTTCAAACCTGCAGCCCTGTG

>6754 len=153 tot-seq=1

TGGGGAATATTGCACAATGGGGGAAACCCTGATGCAGCGACGCCGCGTGAGTGAAGAAGT  
ATTCGGTATGTAAAGCTCTATCAGCAGGGAAGAAAACGCGTCGCAAGGCGCGCGTGACG  
GTACCTGACTAAGAAGCACCGGCTAAATACGTG

>6755 len=154 tot-seq=1

GTGCTTAAACTTGGAACCACTGCTTTCAGTACACTCAATGGATCAGATTTTACATGGT  
CCCGAAAGACCTTCTCCTAATTATAGTGAATGATGCAGCTATCACTAAACTGGATGATC  
ATTACCTAAATATTTAATGCCACAGAATTCTCC

>6756 len=154 tot-seq=1

CAACAGGGAAGAGGAGCCAGTTCACACAGAAGTTGGCTACTTCTGCTCACAGCACATCCT  
GTGTGTCTATATCCATTCTGGCAGGAAATGGCTAAGTCCAGTGTGAAGGAAATTTGGAA  
GTATATTCCTTCTCAGGCAGGAATTCTGAGGCGC

>6757 len=154 tot-seq=1

TTACGCAGACACTGACAAAAGCTTGTTGCTCGGTACCTTTTGGCATTATCAAGAAGAATA  
AGCATGCTCGGCCTTCATCATCTTGAAAGCTCTCGTAGTGATGGCGATCAGCATTGCCA  
ATCAAGTAATCAAAGACAGCCGTGTCAATGATGT

>6758 len=154 tot-seq=1

CACTGGCCAGAGGGTACACACCACAGAATAAAAAATGAAAATGACATGGTCACATTATGAA  
GTAAAAACACAAATTTACACAAAGTTCCAAAACAAGAATTTCACTTCAGTAGGCTCTT

TCAAATCATATTTCTAGTTACAACCCCATACCA

>6759 len=154 tot-seq=1

GTGGAGGAAGGGGAGTTTGGCCAGCTCTAAGGTCTTTCTAGATCATCCCATACATTGCT  
GGGGACCTCCAAGGGACAGACAGTGTCTTCATCAGGTCCTTTAAGGACACAGGTTCTGT  
GCATTGATGGCATTAGTGCTGAAGCCCAATTGCC

>6760 len=154 tot-seq=1

TAAGGAATATTGGTCAATGGACGCAAGTCTGAACCAGCCATGCCGCGTGGAGGATGAAGG  
CCCTCTGGGTTGTAACTTCTTTTATGGGGGACGAAATCACTTATTCTTAAGTGTCTGAC  
GGTACCCAGGAATAAGCACCGGCTAACTCCGTG

>6761 len=154 tot-seq=1

TAGGGAATATTGGGCAATGGTCGGAAGACTGACCCAGCCACGCCGCGTGCAGGAAGAAGG  
CCTTATGGGTTGTAACTGCTTTTATCTGGGAAGAAAAGTCCCTGCGGGGAAAATTGCC  
GGTACCAGATGAATAAGCACCGGCTAACTCCGTG

>6762 len=154 tot-seq=1

TAGGGAATCTTCCACAATGGACGCAAGTCTGATGGAGCAACGCCGCGTGAGTGAAGAAGG  
GTTTCGGGTTGTAACTGCTTTTACGCGGGGATAAAGTGCCTGACGTGTCTCGCATTGCA  
GGTACCGCGTGAATAAGGACCGGCTAATTCCGTG

>6763 len=154 tot-seq=1

TGGGGAATCTCCGCAATGGACGAAAGTCTGACGGAGCAACGCCGCGTGAGTGAAGACGG  
TCTTCGGATTGTAACTGCTTTTACGCGGGGATAAAGTGCCTGACGTGTCTCGCATTGCA  
GGTACCGCGTGAATAAGGACCGGCTAATTCCGTG

>6764 len=154 tot-seq=1

TAGGGAATATTGGGCAATGGCCGAGAGGCTGACCCAGCCATGCCGCGTGCAGGAAGAAGG  
CCTTCTGGGTTGTAACTGCTTTTATATAGGAAGAAAACGCCCTGCGGGGGTAACTGAC  
GGTACTATATGAATAAGCACCGGCTAACTCCGTG

>6765 len=154 tot-seq=1

TGAGGAATATTGGTCAATGGTCGAGAGACTGAACCAGCCATGCCGCGTGAAGGTGACGGC  
CCTATGGGTCTTAACTTCTTTTGTAAAGGGAGCAATAAGTCTTACGCGTAGGATGATGAG  
AGTACCTTACGAATAAGCATCGGCTAACTCCGTG

>6766 len=154 tot-seq=1

ATCTTCCACAATGGGCGCAAGCCTGATGGAGCAACACCGCGTGAGTGAAGAAGGGTTTCG  
GCTCGTAAAGCTCTGTTGTTGGAGAAGAACGTATCTGAGAGTAACTGTTTCATTTCGATGAC  
GGTATCTAACCAGCAAGTCACGGCTAACTACGTG

>6767 len=154 tot-seq=1

TGGGGAATCTCCGCAATGGACGAAAGTCTGACGGAGCAACGCCGCGTGAGTGATGACGG  
CCTTCGGGTTGTAACTGCTTTTATAAGGGAATAAAGTGAGTCTCGTGAGACTTTTTGCA  
TGTACCTTATGAATAAGGACCGGCTAATCCGTG

>6768 len=154 tot-seq=1

TGAGGAATACTGGACAATGGGCGGAAGCCTGATCCAGCCATGCCGCGTGAAGGACTAAGG  
CCCTACGGGTCGTAACTTCTTTGACGCAGAGCAATAAGGTCTACGCGTAGACCGATGAG  
AGTATGCGTCGAATAAGCATCGGCTAACTCCGTG

>6769 len=154 tot-seq=1

TAGGGAATCTTCCACAATGGACGCAAGTCTGATGGAGCAACGCCGCGTGAGTGAAGAAGG  
TCTTCGGATCGTAACTTCTTTTATATAAGAATAAAGTGACAGTATGTATACTGTTTTGTA  
TGTATTATATGAATAAGGATCGGCTAACTCCGTG

>6770 len=154 tot-seq=1

TAGGGAATCTTCGGCAATGGACGGAAGTCTGACCGAGCAACGCCGCGTGAGTGGAGAAGG  
TTTTCGGATCGTAACTTCTTTTATATAAGAATAAAGTGACAGTATGTATACTGTTTTGTA  
TGTATTATATGAATAAGGATCGGCTAACTCCGTG

>6771 len=154 tot-seq=1

TTTTTCAAGCAGAAGACGGCATAACGAGATTATAGCGTGACTGGAGTTAGACGTGTGCTC  
TTCCGATCTACTACGGAGGCAGCAGTGATTAACCTTTAGCAAGAAACGAAAGTTTAACTA  
AGCTATACTAACCCAGGGTTGGTCAATTTTCGTG

>6772 len=154 tot-seq=1

TGGGGAATATTGCACAATGGGCGAAAGCCTGATGCAGCGACGCCGCGTGAGCGAAGAAGT  
ATTCGGTATGTAAAGCTCTATCAGAAGGGAAGAAAGTGCGTGACGTGTCGCGCATCGCA  
GGTACCGCGTGAATAAGGACCGGCTAATCCGTG

>6773 len=154 tot-seq=1

TGAGGAATATTGGTCAATGGGCGAGAGCCTGAACCAGCCAAGTAGCGTGCAGGATGACGG  
CCCTATGGGTTGTAACTGCTTTACGCGGGGATAAAGTGAGGGACGTGTCCCTTATTGCA  
TGTACCATACGAATAAGGACCGGCTAATTCCGTG

>6774 len=154 tot-seq=1

TGGGGAATTTTGGACAATGGGGGCAACCCTGAACCAGCCAAGTAGCGTGCAGGATGACGG  
CCCTATGGGTTGTAACTGCTTTTATGTGGGGATAAAGTGCGTGACGTGTCATGCATTGC  
AGGTACCACATGAATAAGGACCGGCTAATTCCGT

>6775 len=154 tot-seq=1

TGGGGAATATTGGACAATGGAGGGAGCCTGAACCAGCCAAGTAGCGTGCAGGAAGACGGC  
CCTATGGGTTGTAACTGCTTTTATGCGGGGATAAAGGAGTCCACGTGTGGGCTTTTGCA  
GGTACCGCATGAATAAGGACCGGCTAATTCCGTG

>6776 len=154 tot-seq=1

TGGGGAATATTGCACAATGGGGGAAACCCTGATGCAGCAACGCCGCGTGCAGGAAGACGG  
CCCTATGGGTTGTAACTGCTTTTATGCGGGGATAAAGGAGTCCACGTGTGGGCTTTTGCA  
AGGTACCGCATGAATAAGGACCGGCTAATTCCGT

>6777 len=154 tot-seq=1

TAGGGAATATTCCACAATGAGCGAAAGCTTGATGGAGCGACACAGCGTGCACGGTGAAGG  
TCTTCGATTGTAACTGCTTTTATATGGGGATAAAGTGGGGAACGTGTTCCCTTTTGCA  
GGTACCATATGAATAAGGACCGGCTAATTCCGTG

>6778 len=154 tot-seq=1

GAAGAGCCCAGGAGGAGGGGGTGGAGGGTTCGAGGTGTGGGGCGCTGCTTGACCCAGACGC  
CAGGGCCCTGGGAGGAGGATGAGGGGGACAGAGCAGATCTTGGGCGAAAGGGGAGGTTCC  
CGCAGGCTCAGTAGTCGCCGAGTTCCAGCATGG

>6779 len=154 tot-seq=1

AAACAGACGATGAAGTTTGTATAAGGGGTGGCAGGAGAACTGAGGCAGCACCTGCCTGC  
CCCCTGGCCCCAGGGCATAAAGGGCGGGGAACACAAAGAAACACGGACATAGAGTCCCTG  
CTCCTGGTGGCTGGTGGAGCCTGGGAGGGAGGGG

>6780 len=154 tot-seq=1

TGAGGAATATTGGTCAATGGACGAGAGTCTGAACCAGCCAAGTAGCGTGCAGGATGACGG

CCCTATGGGTTGTAACTGCTTTTGTGGGATAAAGTGCCTGACGTGTCATGCATTGCA  
GGTACCACATGAATAAGGACCGGCTAATTCCGTG

>6781 len=154 tot-seq=1

CGGCATCACCTGGGAGCCTCTTAGAAAAGCTCCACCCAGAGCCACTGAATTTGCATTTCA  
CAAGTTCCACATGAGGCTCACACACATATAAGCATTGGGAATCCCTACTCTAGACTTGA  
GATTTTAAGCTATTTTATCCTATTTATCCTGTCC

>6782 len=154 tot-seq=1

TAGGGAATATTGGTCAATGGATGCAAGTCTGAACCAGCCATGCCGCGTGCAGGAAGAAGG  
CCCTATGGGTTGTAACTGCTTTTGCCAGGGGATAAAATGGGCATGCGTGCCTAATTGAA  
GGTACCTGGTGAATAAGCCACGGCTAACTACGTG

>6783 len=154 tot-seq=1

GGGAGAACTCTTTGTTGCCTCAAGCGATGGGGTTGATTCGTGGCATGCACAGTGGTCTG  
AGTTCTCTGCACAGCCCCAGTGAGGCAGAGGCCAAGATGGGCTGGACCAGACCAGTCAAG  
CCTGCCTCAAATCCCTCAATGGCAGGCACAAGC

>6784 len=155 tot-seq=1

TGGGGAATATTGGACAATGGGCGAAAGCCTGATCCAGCCATGCCGCGTGAGGGAAGACGG  
CCCTACGGGTTGTAAACCTCTTTTGTGAGGGAGCAAAGAACGCCACGAGTGGCGTCTCGA  
GAGTACCTGAAGAAAAAGCATCGGCTAACTCCGTG

>6785 len=155 tot-seq=1

TGGGGAATATTGCACAATGGGCGCAAGCCTGAACCAGCCAAGTCGCGTGAGGGAAGACGG  
CCCTACGGGTTGTAAACCTCTTTTGTGAGGGAGCAAAGAACGTACGTGTGGCGTCTCGA  
GAGTACCTGAAGAAAAAGCATCGGCTAACTCCGTG

>6786 len=155 tot-seq=1

TGGGGAATATTGGTCAATGGCCGAGAGGCTGAACCAGCCAAGTCGCGTGAGGGAAGACGG  
CCCTACGGGTTGTAAACCTCTTTTGTCTGGGAGCAAAGAACGCCACGAGTGGCGCCTCGA  
GAGTACCTGAAGAAAAAGCATCGGCTAACTCCGTG

>6787 len=155 tot-seq=1

TGAGGAATATTGGTCAATGGTCGGGAGACTGAACCAGCCAAGCCGCGTGAGGGAGGAAGG  
TACAGAGTATCGTAAACCTCTTTTGTGAGGGAACAAAGACTGGGACGCGTCCCCGGATGA

GTGTACCTGAGGAGGAAGCCACGGCTAACTACGTG

>6788 len=155 tot-seq=1

TAGGGAATTTTCGTCAATGGGCGCAAGCCTGAACGAGCGATGCCGCGTGAGAGAAGACGG  
CCCTACGGGTTGTAAACCTCTTTTGTACAGGGAGCAAAGAACGCCACGAGTGGCGTCTCGA  
GAGTACCTGAAGAAAAAGCATCGGCTAACTCCGTG

>6789 len=155 tot-seq=1

TCAGGCCAAATAGAATGCAGTTAGTAACAGGCCAGAGCAGAGTTTCTTCAAGTTTTCC  
TAGACCATTAGCAGGAGAATTACCTGAGAACTTGCTAGAAATGAAAATTCTCAGGGTCCA  
CCTCAGACTTGCTAAATTAGAAACCCAGGATAGGC

>6790 len=155 tot-seq=1

TGGGGAATATTGCACAATGGGCGCAAGTCTGAACCAGCCATGCCGCGTGCAGGAAGACGG  
CTCTATGAGTTGTAACTGCTTTTGTACTAGGGTAAACGCTTCTACGTGTAGGAGCCTGA  
AAGTATAGTACGAATAAGGATCGGCTAACTCCGTG

>6791 len=155 tot-seq=1

CATACACACACACACACACACACACACACACACACACAGAGAGAGAGAGAGAGAGAGGGG  
GGGCAACATCGCAATATTCACCCAAAGGGCTTGCCCAATGTCTTAAATTCTCTAGGT  
CTCACCTCCGAAGAGTCCCAACTTCCAATAGC

>6792 len=155 tot-seq=1

TGAGGAATATTGGTCAATGGGCGTAAGCCTGAACCAGCCAAGTCGCGTGAGGGATGAAGG  
TTCTATGGATCGTAAACCTCTTTTATACGGGAATAAACGAATCCACGTGTGGATTTTTGC  
ATGTACCGTATGAATAAGGATCGGCTAACTCCGTG

>6793 len=155 tot-seq=1

TGAGGAATATTGGTCAATGGACGAGAGTCTGAACCAGCCAAGTAGCGTGAAGGATGACTG  
CCCTATGGGTTGTAACTTCTTTTATATGGGAATAAACGAATCCACGTGTGGATTTTTGC  
ATGTACCGTATAAATAAGGATCGGCTAACTCCGTG

>6794 len=155 tot-seq=1

TTCTTATACAGACCAGGGAGCCAGAATCAGCAGTAAGGGAACCTCCCTCTTGGCTGTCTGC  
CCTTGCCACCCTACAGCACTCCCAAGCCATCCCTCAGTCTCTCCCACTATTCCACAGGC  
ACACAATCTGTTACGTAAGGACAGAAGTTCTGAGG



>6795 len=155 tot-seq=1

TGAGGAATATTGGTCAATGGACGCAAGTCTGAACCAGCCATGCCGCGTGCAGGATGAAGG  
TGCTATGCATTGTAAACTGCTTTTGTACGAGGGTAAATGCAGGTACGTGTACCTGTTTGA  
AAGTATCGTACGAATAAGGGTCGGCTAACTCCGTG

>6796 len=155 tot-seq=1

TGAGGAATATTGGTCAATGGACGCAAGTCTGAACCAGCCATGCCGCGTGCAGGAAGACGG  
CTCTATGAGTTGTAAACTGCTTTTGTATAAGGGTAAACCTCGGGACGTGTCCCGAGCTGC  
AAGTATTATACGAATAAGGATCGGCTAACTCCGTG

>6797 len=155 tot-seq=1

TGAGGAATATTGGTCAATGGACGCAAGTCTGAACCAGCCATGCCGCGTGCAGGAAGACGG  
CTCTACGAGTTGTAAACTGCTTTTGTACAAGGGTAAACCTACTTACGTGTAAGTAGTTGA  
AAGTACTGTACGAATAAGGATCGGCTAACTCCGTG

>6798 len=155 tot-seq=1

TCCATTGGTTTACAGCAAGTGACGACACCTCAGGCGAGCTAACGAGTCATGGTGTCTACG  
CAGTGCAGGTGGCTGGGATGTGGCTAAGTCAGAGATAATGAGAAAGTCAGGTGCAGGTCA  
TAAGACCTGGCAGCTGTCCCGGGTGCCATCTTGTG

>6799 len=155 tot-seq=1

GGCTGTGTCCCAGGCAGCATAAGACTGTAACCTTAAGCATTGGGTCTAAGATGAGGAA  
GCATGGTTCTGAATGTGCATCTTCTTCCCGTGCCTTACAAGCCCGGAGATGAGTGAAT  
TAGAGCGGCAGCGCAGGGGCGGGAGTGTAGACTAA

>6800 len=155 tot-seq=1

TGAGGAATATTGGTCAATGGCCGAGAGGCTGAACCAGCCAAGTAGCGTGAAGGATGACGG  
CCCTACGGGTTGTAAACTTCTTTTATAAGGGAATAAAGTGCACCACGCGTGGTGTTTTGT  
ATGTACCTTATGAATAAGCATCGGCTAACTCCGTG

>6801 len=155 tot-seq=1

TGAGGAATATTGGTCAATGGGCGCAAGCCTGAACCAGCCATGCCGCGTGCAGGATGACGG  
TCCTATGGATTGTAAACTGCTTTTGTACGGGAAGAAACACTGCTTCGTGAAGCAGCTTGA  
CGGTACCGTAAGAATAAGGATCGGCTAACTCCGTG

>6802 len=155 tot-seq=1

TAGGGAATCTTGGGCAATGGGCGAGAGCCTGACCCAGCCATGCCGCGTGCAGGAAGAAGG  
CTTTCTGAGTCGTAAACTGCTTTTGACAGGGAAGAATAAGCTGAACGTGTTTCAGTGATGA  
CGGTACCTGCAGAATAAGCACCGGCTAACTCCGTG

>6803 len=155 tot-seq=1

TGAGGAATATTGGACAATGGGTGAGAGCCTGATCCAGCCATCCCXCGTGAAGGACGACGG  
CCCTATGGGTTGTAAACTTCTTTTATACTGGGATAAACCTACTTACGTGTAAGTAGCTGA  
AGGTACAGTATGAATAAGCACCGGCTAACTCCGTG

>6804 len=155 tot-seq=1

AATCTTCCACAATGGACGCAATTCTGATGGAGCAACTCCGCGTGAGTGATGAAGGGTTTC  
GGCTCGTAAAGCTCTGTTGTTGGTGAAGAAGGACAGGGGTAGTAACTGACCTTTGTTTGA  
CGGTAATCAATTAGTCCGTACGGCTAACTACGTG

>6805 len=155 tot-seq=1

TAAGGAATATTGGTCAATGGGCGCAAGCCTGAACCAGCCATGCCGCGTGCAGGAAGACGG  
CCCTCTGGGTTGTAAACTGCTTTTGTACGGGAATAAACCTCGCTACGTGTAGCGAGCTGA  
ATGTACCGTAAGAATAAGGATCGGCTAACTCCGTG

>6806 len=155 tot-seq=1

TAAGGAATATTGGTCAATGGGCGGAAGCCTGAACCAGCCACGCCGCGTGCAGGAAGAAGG  
CCCTATGGGTTGTAAACTGCTTTTATACGGGAAGAACGGTCCACCTGCGGGTGGGATTGA  
CGGTACCGTAGGAATAAGCATCGGCTAACTCCGTG

>6807 len=155 tot-seq=1

TGGGGAATCTTCCGCAATGGACGAAAGTCTGACGGAGCAACGCCGCGTGCAGGATGACGG  
CCCTATGGGTTGTAAACTGCTTTTACGCGGGGATAAAGTGCGTGACGTGTCTCGCATTGC  
AGGTACCGCGTGAATAAGGACCGGCTAATTCCGTG

>6808 len=155 tot-seq=1

TGAGGAATATTGGTCAATGGACGTAAGTCTGAACCAGCCAAGTAGCGTGCAGGATGACTG  
CCCTATGGGTTGTAAACTGCTTTTATGCGGGGATAAAGTCAGCCACGTGTGGCTGTTTGC  
AGGTACCGCATGAATAAGGACCGGCTAATTCCGTG

>6809 len=155 tot-seq=1

TGAGGAATATTGGTCAATGGGCGCAAGCCTGAACCAGCCAAGTAGCGTGCAGGACGACGG

CCCTATGGGTTGTAACTGCTTTTATGCGGGGATAAAGTATGGGACGTGTCCCATTTTGT  
AGGTACCGCATGAATAAGGACCGGCTAATTCCGTG

>6810 len=155 tot-seq=1

TGAGGAATATTGGTCAATGGGCGATAGCCTGAACCAGCCAAGTAGCGTGCAGGATGACGG  
CCCTATGGGTTGTAACTGCTTTTGTACGGGAATAAAGTGAGCTACGTGTAGTTTATTGC  
ATGTACCGTACGAATAAGGACCGGCTAATTCCGTG

>6811 len=155 tot-seq=1

TGGGAATATTGCGCAATGGGGGAAACCCTGACCGAGCAACGCCGCGTGAGTGATGACGG  
CCTTCGGGTTGTAAAGCTCTGTTGTAAGGGAAGAACGGTAGATAGAGAATATCTAAGTA  
CGGTACCTTACCAGAAAGCCACGGCTAACTACGTG

>6812 len=155 tot-seq=1

TAGGAATCTTCGGCAATGGGCGCTAGCCTGAACCAGCCAAGTAGCGTGCAGGACGACGG  
CCCTATGGGTTGTAACTGCTTTTATGCGGGGATAAAGTCACCCACGTGTGGGTGTTTGC  
AGGTACCGCATGAATAAGGACCGGCTAATTCCGTG

>6813 len=155 tot-seq=1

AATCTTCCACAATGGACGCAAGTCTGATGGGGCAACGCCGCGTGAGTGAAGAAGGGTTTC  
GGCTCGTAAAGCTCTGTTGTTGGTGAAGAAGGACAGGGGTAGTAACTGACCTTTGTTGA  
CGGTAGTCGGAGAAGAAGCCCCGGCTAACTTCGTG

>6814 len=155 tot-seq=1

TAGGAATCTTCCACAATGGACGCAAGTCTGAACCAGCCAAGTAGCGTGCAGGATGACGG  
CCCTCTGGGTTGTAACTGCTTTTATGTTGGGAATAAAAAAGAGGACGTGTCCTCTATTGT  
ATGTACCTTCAGAAAAAGGACCGGCTAATTCCGTG

>6815 len=155 tot-seq=1

TGAGGAATATTGGTCAATGGTCGGAAGACTGAACCAGCCATGCCGCGTGCAGGAAGAATG  
CCTTATGGGTTGTAACTGCTTTTATATGGGAAGAATAAGGTGTACGTGTACATTGATGA  
CGGTACCATATGAATAAGCATCGGCTAACTCCGTG

>6816 len=155 tot-seq=1

TAGGAATTTTCGTCAATGGGGGGAACCCTGAACGAGCCAAGTAGCGTGCAGGATGACGG  
CCCTATGGGTTGTAACTGCTTTTATATGGGGATAAAGTGGGGAACGTGTTCCCTTTTGC

AGGTACCATATGAATAAGGACCGGCTAATTCCGTG

>6817 len=155 tot-seq=1

TGAGGAATATTGGTCAATGGGCAAGAGCCTGAACCAGCCAAGTAACGTGAAGGATGACTG  
CCCTATGGGTTGTAAACTTCTTTTATAAAGGAATAAAGTCGGGTATGCATACCCGTTTGC  
ATGTACTTTATGAATACGGATCGGCTAACTCCGTG

>6818 len=155 tot-seq=1

TAGGGAATATTCCACAATGAGCGAAAGCTTGATGGAGCGACACAGCGTGCAGGATGACGG  
CCCTATGGGTTGTAAACTGCTTTTATAAGGGAATAAAGTGAGTCTCGTGAGACTTTTTGC  
ATGTACCTTATGAATAAGGACCGGCTAATTCCGTG

>6819 len=155 tot-seq=1

TGAGGAATATTGGTCAATGGGCGTGAGCCTGAACCAGCCAAGTAGCGTGCAGGATGACGG  
CCCTATGGGTTGTAAACTGCTTTTATACGGGGATAAAAGGGTGAACGTGTTCTCCTTTGC  
AGGTACCGTATGAATAAGGACCGGCTAATTCCGTG

>6820 len=155 tot-seq=1

TGAGGAATATTGGTCAATGGGCGAGAGCCTGAACCAGCCAAGTCGCGTGCAGGAAGACGG  
CCCTATGGGTTGTAAACTGCTTTTTCAGCAGGGTAAAGTGATTCACGTGTGGGTCATTGC  
AAGTATGCTGAGAATAAGCATCGGCTAACTCCGTG

>6821 len=155 tot-seq=1

TGAGGAATATTAGACAATGGGCGGAAGCCTGATCCAGCCATGCCGCGTGAAGGACTAAGG  
CCCTACGGGTCGTAAACTTCTTTTGACGCAGAGCAATAAGATCTACGTGTGGACCGATGA  
GAGTATGCGTCGAATAAGCATCGGCTAACTCCGTG

>6822 len=155 tot-seq=1

TGAGGAATATTGGTCAATGGACGAGAGTCTGAACCAGCCAAATCGCGTGAAGGAAGACTG  
CCCTACGGGTTGTAAACTTCTTTTGTACAGGAATAAAAGACATTACGTGTAATGTATTGC  
ATGTACTGTACGAATAAGCATCGGCTAACTCCGTG

>6823 len=155 tot-seq=1

TGAGGAATATTGGTCAATGGGCGAGAGCCTGAACCAGCCAAGTAGCGTGCAGGATGACGG  
CCCTACGGGTTGTAAACTGCTTTTGTGGAGAATAAAACGCCCCACGCGTGGGGCCTTGC  
ATGTATCCAGTGAATAAGGACCGGCTAATTCCGTG

>6824 len=155 tot-seq=1

TAGGGAATATTGGGCAATGGACGAGAGTCTGACCCAGCCATGCCGCGTGCAGGAAGAAGG  
CTTTCTGAGTCGTAAACTGCTTTTGACAGGGAAGAATAAGGCGTACGTGTACGCTGATGA  
CGGTACCTGCAGAATAAGCACCGGCTAACTCCGTG

>6825 len=155 tot-seq=1

TGAGGAATATTGGTCAATGGACGCAAGTCTGAACCAGCCATGCCGCGTGCAGGATGACGG  
CTCTACGAGTTGTAAACTGCTTTTGTATGAGGGTAAACCTAGGTACGTGTACCTAGCTGA  
AAGTACCATACGAATAAGGATCGGCTAACTCCGTG

>6826 len=155 tot-seq=1

TGAGGAATATTGGACAATGGGCGAGAGCCTGATCCAGCCATGCCGCGTGCAGGAAGACGG  
CCCTATGGGTTGTAAACTGCTTTTGTACGGGAAGAAACACCCCCTCGTGAGGGGGCTTGA  
CGGTACCGTAAGAATAAGGATCGGCTAACTCCGTG

>6827 len=155 tot-seq=1

TGAGGAATATTGGTCAATGGGCGAGAGCCTGGACCAGCCAAGTAGCGTGCAGGATGACGG  
CCCTATGGGTTGTAAACTGCTTTTATAAGGGAATAAAGTGAGCTACGTGTAGCTTTTTGC  
ATGTACCTTATGAATAAGGACCGGCTAATCCGTG

>6828 len=155 tot-seq=1

TGAGGAATATTGGTCAATGGGCGGAAGCCTGAACCAGCCATGCCGCGTGACGGAATACGG  
CCCTATGGGTCTTAAACGTCTTTGGTCCCGGAGCAATAAGAGCCACGTGTGGCTCGATGA  
GAGTACGGGAAGAACAAGCATCGGCTAACTCCGTG

>6829 len=155 tot-seq=1

TAGGGAATTTTCGGCAATGGGGGAACCCTGACCGAGCAACGCCGCGTGAGTGAAGAAGG  
TCTTCGGATTGTAAACTCTGTTGTAAGGGAAGAACGGTGAGATGCATAATCTCAAGTGA  
CGGTACCTTACCAGAAAGCCACGGCTAACTACGTG

>6830 len=155 tot-seq=1

AATCTTCCACAATGGACGCAAGTCTGATGGAGCAACGCCGCGTGAGTGAATAAGGGTTTC  
GGCTCGTAAAGCTCTGTTGTTGGTGAAGAAGGACAGGGGTAGTAACTGACCCCCGTTTGA  
CGGTAAGCAAGTAGAAAGTCACGGCTAACTACGTG

>6831 len=155 tot-seq=1

TGAGGAATATTGGTCAATGGGCGGAAGCCTGAACCAGCCAAGTCGCGTGAAGGAAGAAGG  
TATTATGTATTGTAACTTCTTTAGCAGTGGAAAAATAAGGGGGTCGTGACCCCCGATGC  
TAGTACACTGAGAATAAGGATCGGCTAACTCCGTG

>6832 len=155 tot-seq=1

CAAGCCCAGAGGTAGGGGACTCCAAGGTTGGTTGATCCAGGGCTTAACGATGTCATCAAA  
GACCCAGGTTCTTTCTGTCTCGGCACCTCTGTCTGCAGGGCCAGCTTCATCCTAAGCCAG  
ATTGTTCTTGTCTTGATTACAAGTTGGCTGCTGGG

>6833 len=155 tot-seq=1

ATGGAGCACCTTGGCTTCCTTCTGCAGATCCGCCACCTCAAACCTTTCTAGCAGTTTCG  
TCTTCATCCTACCCACCATTGTGGGAGCTGAGGGGGACATCTTTTGAAAAGGGCCAG  
GTTGTTAAGTTCCTGTTTCCTTGGAGGTTTTATCT

>6834 len=155 tot-seq=1

TAAGGAATATTGGTCAATGGGGGCAACCCTGAACCAGCCATGCCGCGTGCAGGATGACTG  
CCCTATGGGTTGTAACTGCTTTTGCCGGGGAATAAACCCCTCCACGAGTGGAGGGCTGA  
ATGTACCCGGAGAATAAGGATCGGCTAACTCCGTG

>6835 len=155 tot-seq=1

TAAGGAATATTGGTCAATGGAGGCAACTCTGAACCAGCCATGCCGCGTGCAGGAAGACGG  
CCCTATGGGTTGTAACTGCTTTTATGTCGGAATAAACCTATTTACGTGTAAATAGCTGA  
ATGTACGGCAAGAATAAGGATCGGCTAACTCCGTG

>6836 len=155 tot-seq=1

TGAGGAATATTGGTCAATGGACGCAAGTCTGAACCAGCCAAGTAGCGTGCAGGATGACGG  
CTCTAAGGGTTGTAACTGCTTTTATATGGGGATAAAGTGGGGAACGTATTCTCCTTTGC  
AGGTACCATATGAATAAGGACCGGCTAATTCCGTG

>6837 len=155 tot-seq=1

AATATTCCACAATGAGCGAAAGCTTGATGGAGCGACGCCGCGTGAGTGAAGAAGGGTTTC  
GGCTCGTAAAGCTCTGTTGTTGGTGAAGAAGGACAGGGGTAGTAACTGACCTTTGTTGA  
CGGTAATCAATTAGAAAGTCACGGCTAACTACGTG

>6838 len=155 tot-seq=1

GATCTTCCACAATGGACGCAAGTCTGATGGAGCAACGCCGCGTGAGTGAAGAAAGTTTTTC

GGATCGTAAAGCTCTGCTGTCGGTGAAGAAGGATAGAGGTAGTACTGGCCTTTATTTGA  
CGGTAATCAACCAGAAAGTCACGGCTAACTACGTG

>6839 len=155 tot-seq=1

TGAGGAATATTGGTCAATGGGCGAGAGCCTGAACCAGCCAAGTAGCGTGCAGGACGACTG  
CCCTATGGGTTGTAACTGCTTTTATAGGGGAATAAAGTGAGGCACGTGTGCCTTTTTGT  
ATGTACCCTATGAATAAGGACCGGCTAATTCCGTG

>6840 len=155 tot-seq=1

TGAGGAATATTGGTCAATGGACGGAAGTCTGAACCAGCCAAGCAGCGTGCAGGATGACGG  
CCCTATGGGTTGTAACTGCTTTTATGTGGGAATAAAGTGAGGGACGTGTCCCTTTTTGT  
AGGTACCACATGAATAAGGACCGGCTAGTTCCGTG

>6841 len=155 tot-seq=1

TGGGGAATTTTGGACAATGGGGGCAACCCTGATCCAGCCATGCCGCGTGCAGGATGACGG  
CCCTATGGGTTGTAACTGCTTTTATATGGGGATAAAGTGGGGAACGTGTTCCCTTTTGC  
AGGTACCATATGAATAAGGACCGGCTAATTCCGTG

>6842 len=155 tot-seq=1

TAGGGAATCTTCCACAATGGACGCAAGTCTGATGGAGCAACGCCGCGTGAGGAAGGAAGG  
TACAGAGTATCGTAAACCTCTTTTGTGAGGGAACAAAGGCGGGGACGTGTCCCCGGATGA  
GTGTACCTGAAGAAAAAGCATCGGCTAACTCCGTG

>6843 len=155 tot-seq=1

TGGGGAATATTGCGCAATGGGGGAAACCCTGACGCAGCGACGCCGCGTGCAGGAAGACGG  
CCCTATGGGTTGTAACTGCTTTTATGTGGGGATAAAGTGCGCGACGTGTCATGCATTGC  
AGGTACCACATGAATAAGGACCGGCTAATTCCGTG

>6844 len=155 tot-seq=1

TGGGGAATCTTCCGCAATGGACGAAAGTCTGACGGAGCAACGCCGCGTGAGGGAAGACGG  
TCCTATGGATTGTAAACCTCTTTTGTGAGGGAGCAAAAACTGCCACGCGTGGCAGGATGA  
GAGTACCTGAAGAAAAAGCATCGGCTAACTCCGTG

>6845 len=155 tot-seq=1

TGAGGAATATTGGTCAATGGGCGCGAGCCTGAACCAGCCAAGTCGCGTGAGGGAAGACGG  
TCCTATGGATTGTAAACCTCTTTTGCCGGGGAGCAAGCTGTGCCACGTGTGGCAGGATGA

GAGTACCTGAAGAAAAAGCATCGGCTAACTCCGTG

>6846 len=155 tot-seq=1

TGAGGAATATTGGTCAATGGCCGGGAGGCTGAACCAGCCAAGTCGCGTGAGGGAAGACGG

CCCTACGGGTTGTAAACCTCTTTTGCCGGGGAGCAAAGGGCGGGATGTGTCCCGCGTCGA

GAGTACCCGGAGAAAAAGCATCGGCTAACTCCGTG

>6847 len=155 tot-seq=1

TGAGGAATATTGGTCAATGGGCGCTAGCCTGAACCAGCCAAGTAGCGTGAAGGATGAAGG

CTCTATGGGTTGTAAACTGCTTTTACGCGGGGATAAAGTGCGTGACGTGTCTCGCATTGC

AGGTACCGCGTGAATAAGGACCGGCTAATTCCGTG

>6848 len=155 tot-seq=1

TGGGGAATATTGGGCAATGGGCGAAAGCCTGACCCAGCAACGCCGCGTGAGTGATGACGG

CCCTATGGGTTGTAAACTGCTTTTATATGGGAATAAAGTGAGGGACGTGTCCCTTATTGC

ATGTACCATACGAATAAGGACCGGCTAATTCCGTG

>6849 len=155 tot-seq=1

TGAGGAATATTGGTCAATGGCCGGAAGGCTGAACCAGCCAAGCCGCGTGAGGGAAGACGG

CCCTACGGGTTGTAAACCTCTTTAGCCGGGGAACAAGGCGCGGGACGAGTCCCGCTGTGA

GCGTACCCGGAGGATAAGCATCGGCTAACTCCGTG

>6850 len=155 tot-seq=1

TGAGGAATATTGGTCAATGGACGCAAGTCTGAACCAGCCATGCCGCGTGCAGGATGACGG

CTCTATGAGTTGTAAACTGCTTTTGTATATGGGTAAATGTAGGTACGTGTACCTATTTGA

AAGTAATATACGAATAAGGATCGGCTAACTCCGTG

>6851 len=155 tot-seq=1

TGAGGAATATTGGTCAATGGGCGAGAGCCTGAACCAGCCAAGTAGCGTGCAGGACGACGG

CCCTATGGGTTGTAAACTGCTTTTATGTGGGGATAAAGTGCGTGACGTGTCATGCATTGC

AGGTACCACATGTATAAGCTCCGGCTAACTACGTG

>6852 len=155 tot-seq=1

TGAGGAATATTGGTCAATGGGCGAGAGCCTGAACCAGCCAAGTAGCGTGCAGGATGACGG

CCCTATGGGTTGTAAACTGCTTTTATGCGGGGATAAAGTGCGTGACGTGTCATGCACTGC

AGGTACCGCATGAATAAGCGCCGGCTAACTACGTG



>6853 len=155 tot-seq=1

TGAGGAATATTGGTCAATGGGCGCAAGCCTGAACCAGCCATGCCGCGTGCAGGAAGAAGC  
ATCTATGGTGTGTAAACTGCTTTTATACAGGAAGAAACACCCCCACGTGTGGGGGCTTGA  
CGGTACTGTAAGAATAAGGACCGGCTAACTCCGTG

>6854 len=155 tot-seq=1

TGAGGAATATTGGTCAATGGACGGAAGTCTGAACCAGCCAAGTAGCGTGCAGGATGACGG  
CCCTATGGGTTGTAAACTGCTTTTGTATGGGGATAAAGTTAGGGACGTGTCCCTATTTGC  
AGGTACCGTAAGAGAAAGCCACGGCTAACTACGTG

>6855 len=155 tot-seq=1

TGGGGAATCTTGACAATGGGCGAAAGCCTGATGCAGCGACGCCGCGTGCGGGATGAAGG  
CCTTCGGGTTGTAAAGCTCTGTTGTAAGGGAAGAACGGTAGATAGAGAATATCTAAGTGA  
CGGTACCTTACCAGAAAGCCACGGCTAACTACGTG

>6856 len=155 tot-seq=1

TGAGGAATATTGGACAATGGGCGCAAGCCTGATCCAGCCATGCCGCGTGCAGGATGACGG  
TCCTATGGATTGTAAACTGCTTTTGCACAGGAAGAAACAACTCTACGTGTAGAGTCTTGA  
CGGTACTGTGAGAATAAGGATCGGCTAACTCCGTG

>6857 len=155 tot-seq=1

TGAGGAATATTGGTCAATGGGCGAGAGCCTGAACCAGCCAAGTAGCGTGAAGGATGACTG  
CCCTATGGGTTGTAAACTTCTTTTATAAGGGAATAAAGTGAGGGACGTGTCCCTTTTCGT  
ATGTACCTTATGAATAAGGATCGGCTAACTCCGTG

>6858 len=155 tot-seq=1

TGGGGAATATTGCACAATGGACGGAAGTTTGTATGCAGCGACGCCGCGTGCAGGATGACGG  
CCCTATGGGTTGTAAACTGCTTTTACGCGGGGATAAAGTGCGTGACGTGTCGCGCATCGC  
AGGTACCGCGTGAATAAGGACCGGCTAATTCCGTG

>6859 len=155 tot-seq=1

TGGGGAATCTCCGCAATGGACGAAAGTCTGAACCAGCCAAGTAGCGTGCAGGATGACGG  
CCCTATGGGTTGTAAACTGCTTTTATACGGGGATAAAGTTAGGGACGTGTCCCTATTTGC  
AGGTACCGTATGAATAAGGACCGGCTAATTCCGTG

>6860 len=155 tot-seq=1

TGAGGAATATTGGTCAATGGCCGGGAGGCTGAACCAGCCAAGTCGCGTGAGGGAAGACGG  
TCCTATGGATTGTAAACCTCTTTTGTGAGGGAGCAAAAAGTCCACGTGTGGCAGGATGA  
GAGTACCTGACTAAGAAGCCCCGGCTAACTACGTG

>6861 len=155 tot-seq=1

TGAGGAATATTGGTTAATGGACGAGAGTCTGAACCAGCCAAGTTGCGTGCAGGATGACGG  
CCCTATGGGTTGTAAACTGCTTTTATGTGGGGATAAAGTGAGCCTCGTGAGGCTTTTTGC  
ATGTACCTTATGAATAAGGACCGGCTAATCCGTG

>6862 len=155 tot-seq=1

TGAGGAATATTGGTCAATGGACGAGAGTCTGAACCAGCCAAGTAGCGTGCAGGATGACGG  
CCCTATGGGTTGTAAACTGCTTTTATAAGGGAATAAAGTGAGAGTCGTGACTCGTTTTGC  
ATGTACCATTGAATAAGGACCGGCTAATCCGTG

>6863 len=155 tot-seq=1

TGAGGAATATTGGTCAATGGACGAGAGTCTGAACCAGCCAAGTAGCGTGAAGGATGACTG  
CCCTATGGGTTGTAAACTTCTTTTATACGGGAATAAAGGGCGGTATGCATACCGCGTTGC  
ATGTACCGTATGAATAAGGATCGGCTAACTCCGTG

>6864 len=155 tot-seq=1

TGAGGAATATTGGTCAACGGACGCAAGTCTGAACCAGCCAAGTAGCGTGCAGGATGACGG  
CCCTATGGGTTGTAAACTGCTTTTATATGGGGATAAAGTGCGTGACGTGTCACGCATTGC  
AGGTACCGCATGAATAAGGACCGGCTAATCCGTG

>6865 len=155 tot-seq=1

TGAGGAATATTGGTCAATGGGCGAGAGCCTGAACCAGCCAAGTAGCGTGCAGGATGACGG  
CCCTATGGGTTGTAAACTGCTTTTATAAGGGAATAAAGTGAGAGTCGTGACTCTTTTTGC  
ATGTACCTTTGAATAAGCGCCGGCTAACTACGTG

>6866 len=155 tot-seq=1

TGAGGAATATTGGTCAATGGACGCAAGTCTGAACCAGCCAAGTAGCGTGCAGGATGACGG  
CCCTATGGGTTGTAAACTGCTTTTATAAAGGAATAAAGTGGGTCTCGTGAGACTTTTTGC  
ATGTACCTTATGAATAAGGACCGGCTAATCCGTG

>6867 len=155 tot-seq=1

TGAGGAATATTGGTCAATGGACGAGAGTCTGAACCAGCCAAGTAGCGTGCAGGATGACGG

CCCTATGGGTTGTAACCTGCTTTTATAAGGGAATAAAGTGAGCCTCGTGAGGCTTTTTGC  
ATGTACCTTATGAATAAGCATCGGCTAACTCCGTG

>6868 len=155 tot-seq=1

TGGGGAATATTGCGCAATGGGCGGAAGCCTGATCCAGCCATGCCGCGTGAAGGACTAAGG  
CCCTACGGGTCGTAAACTTCTTTTGACGCAGAGCAATAAGGTCCACGTGTGGACCGATGA  
GAGTATGCGTCGAATAAGCATCGGCTAACTCCGTG

>6869 len=155 tot-seq=1

TGGGGAATATTGCACAATGGGCGAAAGCCTGATGCAGCGACGCCGCGTGAGCGAAGACGG  
CCCTATGGGTTGTAACCTGCTTTTATGCGGGGATAAAGGAGTCCACGTGTGGGCTTTTTGC  
AGGTATCGCATGAATAAGGACCGGCTAATTCCGTG

>6870 len=155 tot-seq=1

TGGGGAATATTGCACAATGGAGGGAECTCTGATGCAGCCAAGTAGCGTGCAGGAAGACGG  
CCCTATGGGTTGTAACCTGCTTTTATGCGGGGATAAAGGAGTCCACGTGTGGGCTTTTTGC  
AGGTATCGCATGAATAAGGACCGGCTAATTCCGTG

>6871 len=155 tot-seq=1

TGAGGAATATTGGTCAATGGGCGCTAGCCTGAACCAGCCAAGTAGCGTGCAGGATGACGG  
CCCTATGGGTTGTAACCTGCTTTTATGCGGGGATAAAGTCACCCACGTGTGGGTGTTTGC  
AGTTACCATACGAATAAGCATCGGCTAACTCCGTG

>6872 len=155 tot-seq=1

TAGGGAATTTTTACAATGGGCGCAAGCCTTATGAAGCAATGCCGCGTGAACGATGAAGG  
TCTTATAGATTGTAAGTTCTTTTATATGGGAATAAAGTGAGGGACGTGTCCCTTATTGC  
ATGTACCATACGAATAAGGACCGGCTAATTCCGTG

>6873 len=155 tot-seq=1

TGAGGAATATTGGTCAATGGACGTGAGCCTGAACCAGCCAAGTCGCGTGAAGGAAGAAGG  
TTCTATGGATTGTAACCTTCTTTATACGGGAATAAAGTGCGCCACGTGTGGTGTTTTGT  
ATGTACCGTATGAATAAGCATCGGCTAACTCCGTG

>6874 len=155 tot-seq=1

TGAGGAATATTGGTCAATGGTCGGAAGACTGAACCAGCCAAGCCGCGTGAAGGATGAAGG  
TACTTAGTATCGTAACTTCTTTTGTGAGGGAGCAACGGACGCCACGTGTGGCGTTATGA

GTTTACCTGAAGAAAAAGCATCGGCTAACTCCGTG

>6875 len=155 tot-seq=1

CAGTGGTGAAAGATCAGTGTATGAAGTGCAGCCAGAAGGGCAGACAACAGGAAGGACGT  
GAGATCTGAGATGGTTGTTGGGATGGGATGGGTTAGGGAGTTCAGGAGGGAGAGCTAGAG  
AGTTTGGATCTGTCCAGGGTACTGGGAGCGAGGGA

>6876 len=155 tot-seq=1

TGAGGAATATTGGTCAATGGTCGCAAGACTGAACCAGCCATGCCGCGTGCAGGATGACGG  
TCCTATGGATTGTAACTGCTTTTGTACGGGAAGAAACACTCCTACGTGTAGGGGCTTGA  
CGGTACCGTAAGAATAAGGATCGGCTAACTCCGTG

>6877 len=155 tot-seq=1

TGAGGAATATTGGTCAATGGCCGGAAGGCTGAACCAGCCAAGTAGCGTGAAGGATGAAGG  
TTCTATGGATTGTAACTTCTTTTATACGCGAATAAAACCACCTACGTGTAGGTGCTTGT  
ATGTACCGTATGAATAAGCATCGGCTAACTCCGTG

>6878 len=155 tot-seq=1

TGAGGAATATTGGTCAATGGGCGAGAGCCTGAACCAGCCAAGTAGCGTGCAGGATGACGG  
CCTTATGGGTTGTAACTGCTTTTATGCGAGGATAAAGTTACCCACGTGTGGGTGTTTGC  
AGGTATCGCATGAATAAGGACCGGCTAATTCCGTG

>6879 len=155 tot-seq=1

TGGGGAATCTCCGCAATGGGCGGGAGCCTGAACCAGCCAAGTAGCGTGCAGGAAGACGG  
CCCTATGGGTTGTAACTGCTTTTATGCGGGGATAAAGGAGTCCACGTGTGGGCTTTTGC  
AGGTACCGCATGAATAAGGACCGGCTAATTCCGTG

>6880 len=155 tot-seq=1

TGGGGAATATTGCGCAATGGGGGAAACCCTGACCGAGCAACGCCGCGTGAGTGATGAAGG  
TCTTCGATTGTAAAGCTCTGTTGTAAGGGAAGAACGGCATCTATAGAATAGGTGAGTGA  
CGGTACCTTACCAGAAAGCTACGGCTAACTACGTG

>6881 len=155 tot-seq=1

TGGGGAATATTGACAATGGAGGGAACCTGATCCAGCAATTCTGTGTGTGTGATGACGG  
CCCTATGGGTTGTAACTGCTTTTATATGGGAATAAAGTGAGGGACGTGTCCCTTATTGC  
ATGTACCATACGAATAAGGACCGGCTAATTCCGTG

>6882 len=155 tot-seq=1

TGAGGAATATTGGTCAATGGGCGCTAGCCTGAACCAGCCAAGTAGCGTGAAGGATGACTG  
CCCTATGGGTTGTAAACTTCTTTTATACGGGAATAAAGTGAGGCACGTGTGCCTTTTTGT  
ATGTACCGTATGAATATGGATCGGCTAACTCCGTG

>6883 len=155 tot-seq=1

TGGGGAATATTGCACAATGGGCGGGAGCCCGAACCAGCCAAGTAGCGTGCAGGATGACGG  
CCCTATGGGTTGTAAACTGCTTTTATATGGGAATAAAGTGAGGGACGTGTCCCTTATTGC  
ATGTACCATATGAATAAGGACCGGCTAACTCCGTG

>6884 len=155 tot-seq=1

TGAGGAATATTGGTCAATGGGCGCAAGCCTGAACCAGCCAAGTAGCGTGCAGGATGACGG  
CCCTATGGGTTGTAAACTGCTTTCAGTCGGGAATAACTCGTCGGTCGTGACCGACGTTGC  
AGGTACCGTCATAAGAAGGACCGGCTAATTCCGTG

>6885 len=155 tot-seq=1

TGAGGAATATTGGTCAATGGGCGGGAGCCTGAACCAGCCAAGTAGCGTGCAGGAAGACGG  
CCCTATGGGTTGTAAACCTCTTTAGGCGGGGAGTAATGTGCTCTACGCGTAGAGTAGTGA  
GAGTACCCGCAGAATAAGCATCGGCTAACTCCGTG

>6886 len=155 tot-seq=1

TGGGGAATATTGGACAATGGGCGGAAGCCTGATCCAGCAACGCCGCGTGAGGGATGACGG  
CCTTCGGGTTGTAAACCTCTTTCAGTGCCGACGAAGCCTTGCCTTTTGGGGGTGGGGTGA  
CGGTAGGTGCAGAAGAAGGACCGGCCAACTACGTG

>6887 len=155 tot-seq=1

TGAGGAATATTGGTAAATGGAAGAAAGTATGAAAAAGAAAAGTAGAGTGAAGGATGAAGG  
AAATATGGGTTGTAAAATGATTTTATATGGGGATAAAGTGGGGAACGTGTTCCCTTTTGC  
AGGTACCATATGAATAAGGACCGGCTAATTCCGTG

>6888 len=155 tot-seq=1

TGGGGAATATTGCACAATGGGGGAAACCCTGATGCAGCGACGCCGCGTGAAGGATGACTG  
CCCTATGGGTTGTAAACTTCTTTTATACGGGAATAAAGTGAGGCACGTGTGCCTTTTTGT  
ATGTACCGTATGAATAAGGATCGGCTAACTCCGTG

>6889 len=155 tot-seq=1

CAGCAGGGCAGGACTGCTAGGCGTCGTCAGTGGTCTGGAGCAGTCAGCAGGGGGC  
GCCTGTCTCGGGCCATGCTCTCCACTCCTTCTTACCATGACGTACAGCCTCATTGCTG  
CCTGGGCATCCTGAATCTAGACGACATGAAACATC

>6890 len=155 tot-seq=1

TGGGGAATATTGGACAATGGAGGGAAGTCTGATCCAGCCAAGTAGCGTGCAGGATGACGG  
CCCTATGGGTTGTAACTGCTTTTATATGGGGATAAAGTGGGGAACGTGTTCCCTTTTGC  
AGGTACCATATGAATAAGGACCGGCTAATTCCGTG

>6891 len=155 tot-seq=1

GCAGGATCCTTGACCATCACTCCCTGAGTTCAGCCTCACTGCAGCGGTCTCGGCAGAGGG  
CAGCTCTCTTTCCTTCATCTGCTCAAGCCAGAACCCTGGAGTTTCTTGATGTTTCTCTC  
CCTCACACTCCATGTTCACTCCGTCCTCAGTACAG

>6892 len=155 tot-seq=1

TGAGGAATATTGGTCAATGGACGGAAGTCTGAACCAGTCAAGTAGCGTGCAGGATGACGG  
CCCTATGGGTTGTAACTGCTTTTATACGGGGATAAAGTGAGCCACGTGTGGCTTATTGC  
GGGTACCGTATGAATAAGGACCGGCTAATTCCGTG

>6893 len=155 tot-seq=1

TGAGGAATATTGGTCAATGGGCGAGAGCCTGAGCCAGCCAAGTCGCGTGAAGGATGAAGG  
ATCTATGGTTCGTAACTTCTTTTATAAGGGAATAAAGTGCGGCACGTGTGCTGTTTTGT  
ATGTACCTTATGAATAAGGATCGGCTAACTCCGTG

>6894 len=155 tot-seq=1

CTGGGTTAGAAACAACGGGAGGAGGGCTGGTTTCAGAGGGTATTTGGGAAGTTACAGGGC  
TGCCTGTTGGCATTGAGGTGGATGTGTGCTACTAACGAAGTCAATTTGAGCTGGAATTC  
TGGAGGGAAGTCCAGCCTGGTGGTATCAATTCGGG

>6895 len=155 tot-seq=1

TGAGGAATATTGGTCAATGGGCGGAAGCCTGAACCAGCCATGCCGCGTGCAGGAAGACGG  
CTCTATGAGTTGTAACTGCTTTTATATGGGAATAAAGTTTTCCACGTGTGGAATTTTGT  
ATGTACCATATGAATAAGGATCGGCTAACTCCGTG

>6896 len=155 tot-seq=1

TAGGGAATTTTCGGCAATGGGCGAAAGCCTGACCGAGCAACGCCGCGTGCAGGATGACGG

CCCTATGGGTTGTAACTGCTTTTATATGGGGATAAAGTGGGGAACGTGTTCCCTTTTGC  
AGGTACCATATGAATAAGGACCGGCTAATTCCGTG

>6897 len=155 tot-seq=1

TGGGGAATCTTCCGCAATGGACGAAAGTCTGACGGAGCAACGCCGCGTGAGTGAAGACGG  
CCCTATGGGTTGTAACTGCTTTTATGTGGGGATAAAGTGCGTGACGTGTCATGCATTGC  
AGGTACCACATGAATAAGGACCGGCTAATTCCGTG

>6898 len=155 tot-seq=1

TGAGGAATATTGGTCAATGGACGAGAGTCTGAACCAGCCAAGTAGCGTGCAGGATGACGG  
CCCTATGGGTTGTAACTGCTTTTGTGGGAATAAAGTGAGGGACGTGTCCCTTATTGC  
ATGTACCATACGAATAAGGACCGGCTAATTCCGTG

>6899 len=155 tot-seq=1

TGAGGAATATTGGTCAATGGACGCAAGTCTGAACCAGCCAAGTAGCGTGCAGGACGACGG  
CCCTCCGGGTTGTAACTGCTTTTAGTTGGGAATAAAGTGCAGCTCGTGAGCTGTTTTGT  
ATGTACCATCAGAAAAAGGACCGGCTAATTCCGTG

>6900 len=155 tot-seq=1

TGAGGAATATTGGTCAATGGACGAGAGTCTGAACCAGCCAAGTAGCGTGCAGGATGACGG  
CCCTATGGGTTGTAACTGCTTTTATGCGGGGATAAAGGAGTCCACGTGTGGATTTTTGC  
ATGTACCATTGAATAAGGACCGGCTAATTCCGTG

>6901 len=155 tot-seq=1

TGAGGAATATTGGTCAATGGACGAGAGTCTGAACCAGCCAAGTAGCGTGCAGGATGACGG  
CCCTATGGGTTGTAACTGCTTTTGTGGGAATAATCGACATTACGTGTAGGTGTTTGC  
AGTTACCATACGAATAAGCATCGGCTAACTCCGTG

>6902 len=155 tot-seq=1

TAAGGAATATTGGTCAATGGACGGAAGTCTGAACCAGCCATGCCGCGTGCAGGAAGACGG  
CCCTATGGGTTGTAACTGCTTTTATACGGGAACAAACGTCGGTACGTGTACCGGTCTGA  
GTGTACCGTAAGAATAAGGATCGGCTAACTCCGTG

>6903 len=155 tot-seq=1

TGAGGAATATTGGTCAATGGACGAGAGTCTGAACCAGCCAAGTCGCGTGAAGGACGACGG  
TTCTATGGATTGTAACTTCTTTGTGCTAGAGTAAAGTCAGGTACGTGTACCTGATTGC

AAGTATAGTACGAATAAGCATCGGCTAACTCCGTG

>6904 len=155 tot-seq=1

TGAGGAATATTGGTCAATGGGTGAGAGCCTGAACCAGCCAAGTAGCGTGCAGGATGACGG  
CCCTATGGGTTGTAACTGCTTTTACGCGGGGATAAAGTGCGTGACGTGTCTCGCATTGC  
AGGTACCTTACTAAGAAGCTCCGGCTAAATACGTG

>6905 len=155 tot-seq=1

TGAGGAATATTGGACAATGGGCGGAAGCCTGATCCAGCCATGCCGCGTGCAGGATGAAGC  
ATCTATGGTGTGTAACTGCTTTTGTACGGGAAGAAAACAAGCTACGTGTAGCTTACTGA  
CGGTACCGTAAGAATAAGGATCGGCTAACTCCGTG

>6906 len=155 tot-seq=1

TGAGGAATATTGGTCAATGGACGCAAGTCTGAACCAGCCATGCCGCGTGCAGGAAGACGG  
CTCTATGAGTTGTAACTGCTTTTGTACGAGGGTAACTCGGATACGTGTATCCGTTTGA  
AAGTATCGTACGAATAAGGATCGGCTAGCTCCGTG

>6907 len=155 tot-seq=1

TGAGGAATATTGGTCAATGGGTGAGAGCCTGAACCAGCCAAGTAGCGTGCAGGATGACGG  
CCCTGTGGGTTGTAAACGGCTTTTACGCGGAGATAAAGTGCGTGACGTGTCCCGCATTGC  
AGGTACCGCGTGAATAAGGACCGGCTAATTCCGTG

>6908 len=155 tot-seq=1

TTTTTTTTCAAGCAGAAGACGGCATAACGAGATCCAACCGTACTGGAGTGCAGACGTGT  
GCTCTCCGATCTCCTACGGGAGGCAGCAAGGAAAATCTTGAAGAAGGGGCAGAGCTTTC  
AGCTCTTAAGTGAAGTTAAAGTGAAGATGGAGAC

>6909 len=155 tot-seq=1

TGGGGAATATTGCGCAATGGGGGAAACCCTGAACCAGCCAAGTAGCGTGAAGGATGAAGG  
CTCTATGGGTCGTAACTTCTTTTATATGGGAATAAAGTATTCCACGTGTGGAATTTTGT  
ATGTACCATATGAATAAGGATCGGCTAACTCCGTG

>6910 len=155 tot-seq=1

TGGGGAATATTGCGCAATGGGGGAAACCCTGACGCAGCGACGCCGCGTGCGGGATGAAGG  
TTCTATGGATCGTAAACCTCTTTTATAAGGGAATAAAGTGTGGGACGTGTCCTGTTTTGT  
ATGTACCTTATGAATAAGGATCGGCTAACTCCGTG



>6911 len=155 tot-seq=1

TGGGGAATATTGCGCAATGGGGGAAACCCTGAACCAGCCAAGTAGCGTGAAGGATGACTG  
CCCTATGGGTTGTAAACTTCTTTTATATGGGAATAAAACAGGGTATGCATACCCTCTTGT  
ATGTACCATATGAATAAGGATCGGCTAACTCCGTG

>6912 len=155 tot-seq=1

TTTTTTTTCAAGCAGAAGACGGCATAACGAGATAAGTTGGTGACTGGAGTGCAGACGTGTG  
CTCTCCGATCTCCTACGGGAGGCGCAGTGATAAATATTAAGCAATAAACGAAAGTTTGA  
CTAAGTTATACCTCTTAGGGTTGGTAAATTTCTGTG

>6913 len=155 tot-seq=1

TGAGGAATATTGGTCAATGGGCGTTAGCCTGAACCAGCCAAGTAGCGTGAAGGATGAATG  
CTCTATGGGTTGTAAACTTCTTTTATATAAGAATAAAGTGCAGTATGTATACTGTTTTGT  
ATGTATCTTATGAATAAGGATCGGCTAACTCCGTG

>6914 len=155 tot-seq=1

TGAGGAATATTGGTCAATGGTCGGGAGACTGAACCAGCCAAGCCGCGTGAGCGAGGAAGG  
TACAGAGTATCGCAAACCTCTTTTGTACAGGGAACAAAGACGGGGACGCGTCCCCGGATGA  
GTGTACCTGAATAAAAAGCATCGGCTAACTCCGTG

>6915 len=155 tot-seq=1

TGGGGAATATTGCGCAATGGGGGAAACCCTGACGCAGCCAAGTAGCGTGAAGGATGACTG  
CCCTATGGGTTGTAAACTTCTTTTATACGGGAATAAAGTGAGGCACGTGTGCCTTTTTGT  
ATGTACCGTATGAATAAGGATCGGCTAACTCCGTG

>6916 len=155 tot-seq=1

TGGGGAATATTGCGCAATGGGGGAAACCCTGACGCAGCAATTCCGCGTGTGTGAAGAAGG  
CCTTCGGGTTGTAAAGCACTTTAGTGAGGGAAGAAACAGCTTGCCACACCAAGCCTTGA  
CGGTACCTCAAGAATAAGCACCGGCTAACTCTGTG

>6917 len=155 tot-seq=1

AGGGGTCAGTAGGAGGTCAGAGGTCACAAGGAGGTCAAGGGTCATGGACAGGTCATTGGG  
CACCTGTGAATCAGGGGTTGATCAGACATATGACCCCAAATGGGGAAGGGGGCACTCC  
TATGGTGGGCACAGAAAGGCCCAAGGGCCCAAGAG

>6918 len=155 tot-seq=1

TGAGGAATATTGGACAATGGGTGCAAGCCTGATCCAGCCATCCCGCGTGCAGGAAGACGG  
CCCTATGGGTTGTAAACTGCTTTTATACAGGAATAAACCTATTCACGTGTGAGTAGTTGA  
AGGTACTGTAAGAATAAGCATCGGCTAACTCCGTG

>6919 len=155 tot-seq=1

TGAGGAATATTGGTCAATGGGCGAGAGCCTGAACCAGCCAAGTAGCGTGCAGGATGACGG  
CCCTACGGGTTGTAAACTGCTTTTGCGGGAGAATAACCGGCGCCACGGGTGGCGCCCCGC  
ATGTATCCCGCGAATAAGGACCGGCTAATTCCGTG

>6920 len=155 tot-seq=1

TGAGGAATATTGGTCAATGGGCGAGAGTCTGAACCAGCCAAGTAGCGTGCAGGATGAAGG  
CTCTATGGGTTGTAAACTGCTTTTATATGAGAATAATCGACAGTACGTATAATGTTTTGC  
ATGTACCATTGCAATAAGGACCGGCTAATTCCGTG

>6921 len=156 tot-seq=1

CAATCAGCCCTTCTGATCACCTCACGCAGAGTAGAATTTAATCCCCCGCCCTGCAGGCTC  
TTCTCCATACACACTAGGCTCCCTTTTGATGTTCTTTGTATCTTCCTTTCTAACCAAGTC  
GCCCTTTAGCAGCTCTGAAAGTGCCTCCTGTACCT

>6922 len=156 tot-seq=1

TGAGGAATATTGGTCAATGGTCTGGGAGACTGAACCAGCCAAGTCGCGTGAGGGAAGACTG  
CCCTATGGGTTGTAAACCTCTTTTGTGAGGGAGCAATTGGCGCTACGTGTAGCGTTATCG  
AGAGTACCTGAAGAAAAAGCATCGGCTAACTCCGTG

>6923 len=156 tot-seq=1

CGTCATGTACTCCAGTCAGTCTCATCGGCTTGTTATCCTGGCATGGTTAGCAACAATAG  
AAACACACAAGAATATGATCCTACAGACTACTAACAAGAGGTGGTGGTGGGTGTCACAAA  
TCCGTCAAGCAAATCTCAAATTCTTACCAGTTCTTA

>6924 len=156 tot-seq=1

AATCTTCCACAATGGGCGCAAGCCTGATGGAGCAACACCGCGTGAGTGAAGAAGGGTTTC  
GGCTCGTAAAACTCTGTTGTAAGAGAAGAACGTGTGTGAGAGTGGAAAGTTCACACAGTG  
ACGGTAACTTACCAGAAAGGGACGGCTAACTACGTG

>6925 len=156 tot-seq=1

TGGGGAATCTTGACAATGGGCGAAAGCCTGATGCAGCGACGCGTGAGTGAAGAAGGTTT

TCGGATCGTAAAGCTCTGTTGTTGGTGAAGAAGGATAGAGGTAGTAACTGGCCTTTATTT  
GACGGTAATCAACCAGAAAGTCACGGCTAACTACGT

>6926 len=156 tot-seq=1

TGAGGAATATTGGTCAATGGGCGAGAGCCTGAACCAGCCAAGTCGCGTGAAGGAAGACTG  
CCC GCAAGGGTTGTAACTTCTTTTGTATGGGATTAAAGTCGTCTACGTGTAGACGTTTG  
CAGTTACCATAAGAAAAAGCCCCGGCTAACTACGTG

>6927 len=156 tot-seq=1

TGAGGAATCTTGGTCAATGGGCGCAATGCCTGAACCAGCCAAGTAGCGTGAAGGAAGACT  
GCCCTTAGGGTTGTAACTTCTTTTATAAGGGAATAACGATAGCAACGAGTTGCTATTTG  
CATGTACCTTACGAATAAGGATCGGCTAACTCCGTG

>6928 len=156 tot-seq=1

CAGTTTTCTCCAGCTGGTTGCTAAAGAGGAAGTCAGAGAAATTCAGAGCATGAGAGATTT  
GCCTTGAGGGATGTTCTCTGTTGCTGAGATGGGGGGGCCATGAGGCAAGAACCTGAGAGC  
AGCCTTAGGAGCTGAGTGCCAGCCCCAGCAAACAG

>6929 len=156 tot-seq=1

TGAGGAATATTGGTCAATGGGCGGAAGCCTGAACCAGCCAAGTCGCGTGAGGGAATAAGG  
CCCTATGGGTCGTAAACCTCTTTTGTCTGGGGAGCAAAGGCGTCCACGTGTGGGCGCAAGG  
AGAGTACCCGAAGAAAAAGCATCGGCTAACTCCGTG

>6930 len=156 tot-seq=1

TGGGGAATATTGCACAATGGGCGCAAGCCTGATGCAGCCATGCCGCGTATATGAAGAAGG  
CCTTCGGGTTGTAAAGTACTTTTACGCGGGGAGGGAGTAAAGTTAATACCTTTGCTCATTG  
ACGTTACCCGCAGAAGAAGCACCGGCTAACTCCGTG

>6931 len=156 tot-seq=1

GAATCTTCCACAATGGACGCAAGTCTGATGGAGCAACGCCGCGTGAGTGAAGAAGGTCTT  
CGGATCGTAAAGCTCTGTTGTTAGAGAAGAACGCGAGTGGGAGTAACTGTCCTTTTCGATG  
ACGGTAACTAACCAGCAAGTCACGGCTAACTACGTG

>6932 len=156 tot-seq=1

TGAGGAATATTGGTCAATGGCCGGAAGGCTGAACCAGCCAAGTCGCGTGAGGGATGACGG  
CCCTACGGGTTGTAAACCTCTTTTGTCTGGGGAGCAAATCCGCCACGCGTGCGGGAGTCG

AGAGTACTCGAAGAAAAAGCATCGGCTAACTCCGTG

>6933 len=156 tot-seq=1

TGAGGAATATTGGTCAATGGGCGAAAGCCTGAACCAAGTAGCGTGCAGGATGACGG  
CCCTATGGGTTGTAACTGCTTTTAGGCGGGGGTAAAGTGCCGGACGTGTTCCGGTATTG  
CAAGTACCGCCAGAAAAAGGACCGGCTAATTCCGTG

>6934 len=156 tot-seq=1

GCAAAAGCCAGATCATACAAGCCTTGCCAGACCCAAATTGGAGAGCCCAGTGGGTTCGTG  
ACACTGTTCTGGAGACTCTAGAAGCTACAGACATGGCTCAGACCTAGTCCCTGCCCTCCA  
GCAGCAGACAGCAACCAAGTGGGATATTAGGCAAGTG

>6935 len=156 tot-seq=1

CGGGAGGCAGCAGTGGGGAATATTGCGCAATGGGGGAAACCCTGCAGAAGCGACGCCGCG  
TGCGGGATGAAGGCCTTCGGGTTGCAAACCGCTTTTGATTGGGAGCAAGCCTTTTGGGTG  
AGGGTACCTTTTGAATAAGCGCCGGCTAACTACGTG

>6936 len=156 tot-seq=1

TAGGGAATATTGCGCAATGGGGGAAACCCTGACGCAGCAACGCCGCGTGAAGGAAGACTG  
CCCGCAAGGGTTGTAACTTCTTTTGTATGGGATTAAGTCGTCTACGTGTAGACGTTTG  
CAGTTACCATACGAATAAGCATCGGCTAACTCCGTG

>6937 len=156 tot-seq=1

TGGGGAATCTCCGCAATGGGCGAAAGCCTGACGGAGCAACGCCGCGTGAAGGAAGACTG  
CCCGCAAGGGTTGTAACTTCTTTTGTATGGGATTAAGTCGTCTACGTGTAGACGTTTG  
CAGTTACCATACGAATAAGCATCGGCTAACTCCGTG

>6938 len=156 tot-seq=1

TGAGGAATATTGGTGCACGGACGAGAGTCTGAACCGCCAAGTCGCGTGAAGGAAGACTG  
CCCGCAAGGGTTGTAACTTCTTTTGTATAGGATTAAGTCGTCTACGTGTAGACGTTTG  
CAGTTACCATACGAATAAGCATCGGCTAACTCCGTG

>6939 len=156 tot-seq=1

AAGGGAGGAAGAAGTGGGGAATATTGCGCAATGGGGGAAACCCTGACGCAGAGAAGAAAA  
GTGAGGGATGAAGGAATTTGGGGGGGAAAAAGAGGGGGAGGGGGAGAAAGAATTAGGGTG  
AGTGTACCTTTTGAATAAGCGCCGGCTAACTACGTG

>6940 len=156 tot-seq=1

TGGGGAATATTGCACAATGGGCGCAAGCCTAAACCAGTCAAGTCGCGTGAGGGAAGACGG  
TCCTATGGATTGTAAACCTCTTTTGCCGGGGAGCAAGCTGTGCCACGTGTGGCGCAGCTG  
AGAGTACCCGGAGAAAAAGCATCGGCTAACTCCGTG

>6941 len=156 tot-seq=1

TGGGGAATCTCCGCAATGGACGAAAGTCTGACGGAGCAACGCCGCGTGAGTGAAGACGG  
CCTTCGGGTTGTAAAGCTCTGTGATTCGGGACGAAAGGCCATATGTGAATAATATGTGGA  
AATGACGGTACCGAATAAGCGCCGGCTAACTACGTG

>6942 len=156 tot-seq=1

TGGGGAATATTGGACAATGGGCGAAAGCCTGATCCAGCCATGCCGCGTGTGTGAAGAAGG  
TCTTCGGATTGTAAAGCACTTTAAGTTGGGAGGAAGGGCAGTTACCTAATACGTGATTGT  
TTTGACGTTAATCAATTAGAAAGTCACGGCTAACTA

>6943 len=156 tot-seq=1

TGGGGAATATTGGACAATGGGGGGAACCCTGATCCAGCGACGCCGCGTGAGGGAAGACGG  
TCCTATGGATTGTAAACCTCTTTTGCCGGGGAGCAAGCTGTGTCACGTGTGACACAGCTG  
AGAGTACCCGGAGAAAAAGCATCGGCTAACTCCGTG

>6944 len=156 tot-seq=1

TGGGGGATATTGGTCAATGGGCGGAGCCTGAACCAGCCAAGTCGCGTGAGGGAAGACGG  
TCCTATGGATTGTAAACCTCTTTTGCCGGGGAGCAAGCTGCGCCACGTGTGGCGCAGCTG  
AGAGTACCCGGAGAAAAAGCATCGGCTAACTCCGTG

>6945 len=156 tot-seq=1

TGAGGAATATTGGTCAATGGGCGAGAGCCTGAACCAGCCAAGTCGCGTGAAGGATGACGG  
CCCTACGGGTTGTAAAATTCTTTTGTAGGGAGCAATTGAGTCCACGTGTGGGCTTAGCG  
AGAGTACCTGAGTAAGAAGCCCCGGCTAACTACGTG

>6946 len=156 tot-seq=1

TGAGGAATATTGGTCAATGGAGGAAACTCTGAACCAGCCAAGTCGCGTGAAGGAAGACGG  
TTCATAAGCATTGTAACTTCTTTTGTAGAGGGGTAAAGGTGCGTACGTGTACGCATTTG  
CAAGTACTCTACGAATAAGTATCGGCTAACTCCGTG

>6947 len=156 tot-seq=1

TGAGGAATATTGGTCAATGGGCGAAAGCCTGAACCAGCCAAGTCGCGTGAGGGAAGACGG  
TCCTATGGATTGTAAACCTCTTTTGTACAGGGAGCAAAGCCATCCTTGCGAGGGTGGAAGG  
AGAGTACCTGAAGAAAAAGCATCGGCTAACTCCGTG

>6948 len=156 tot-seq=1

TAGGGAATCTTCGGCAATGGACGGAAGTCTGACCGAGCAACGCCGCGTGAGTGAAGAAGG  
TTTTCGGATTGTAAAGCACTTTAAGTTGGGAGGAAGGGCATTAACTAATACGTTAGTGT  
TTTGACGTTACCGACAGAATAAGCACCGGCTAACTC

>6949 len=156 tot-seq=1

ATAAGGGAGGAAGAAGTGGGGAATATTGAAAAATGGGAGGAAGAATGATGAAGAGAAGAA  
GAGTGGGGGATGAAGGCCTTCGGGTTGTAACTCCTTTCGACAGGGACGAAGCGTAAGTG  
ACGGTACCTGTATAAGAAGCACCGGCTAACTACGTG

>6950 len=156 tot-seq=1

TAGGGAATCTCCACAATGGGCGAGAGCCTGAACCAGCCAAGTCGCGTGAAGGAAGACTG  
CCCGCAAGGGTTGTAACTTCTTTGTATGGGATTAAAGTCGTCTACGTGTAGACGTTTG  
CAGTTACCATACGAATAAGCATCGGCTAACTCCGTG

>6951 len=156 tot-seq=1

TGGGGAATTTTGGACAATGGGGGCAACCCTGATCCAGCCATGCCGCGTGCGGGAAGAAGG  
CCTTCGGGTTGTAAACCGCTTTTGTACAGGGACGAAAAGGTGCGGGTTAAGAGCTAGCACT  
GATGACGGTACCTGAAGAATAAGCACCGGCTAACTA

>6952 len=156 tot-seq=1

TGAGGAATATTGGTCAATGGAGGCAACTCTGAACCAGCCATGCCGCGTGCAGGATGACGG  
TCCTATGGATTGTAACTGCTTTTATACGGGAAGAAAAAAGATCACGAGTTGGTTTACTG  
ACGGTACCGTAAGAATAAGGATCGGCTAACTCCGTG

>6953 len=156 tot-seq=1

TAGGGAATCATCGGCAATGGGGGAAACCCTGACCGTGCAATGCCGCGTGAGTGATGAAGG  
CCTTATGGGTTGTAAAGCTCTGTTGCGAAGGAAGAATAGCCTAGATAGAATCTAGGTCTG  
ACGGTACTTCGCCAGAAAGTACCGGCTAACTACGTG

>6954 len=156 tot-seq=1

TGAGGAATATTGGTCAATGGGCGGAAGCCTGAACCAGCCAAGTCGCGTGAGGGAAGACGG

TCCTATGGATTGTAAACCTCTTTTGCAGGGGAGCAAAGCCGGCCTCGTGAGGCCGGAAGG  
AGAGTACCCTGAGAAAAAGCATCGGCTAACTCCGTG

>6955 len=156 tot-seq=1

ACGGGAGGCAGCAGTGGGGAATATTGCGCAATGGGGGAACCCTGACCGAGAAACGCCGC  
GTGAACGAAGAAGTAATTCGTTATGTAAAGGTCTTTTATTGGGGAAGAAAGCGCAAGTTG  
ACGGTACCCAAGGAATAAGCTCCGGCTAACTACGTG

>6956 len=156 tot-seq=1

GAATCTGTAATGAGATAGGCAGCGAAGGGGTTTGGCATTGAGTCTGGGTGGAAGAATGG  
TAAAGAACTCTTTTCGGTATTTAAAGAGAACAGGGTAATGTTGGTAGGCATAACATTTT  
CCAATAAAGATTCTTAACAATGACGTTAGGGCCTT

>6957 len=156 tot-seq=1

CCCCAACCTTGCTTCTAGCTTTCTGAATATTGAACAGGCAAAGGCCAGCACAGACAGCAT  
GAGACAGACATCTCTGACCCCATAGAGTCTCGGGCATTACCTCCTAATGCTATGAGTAA  
ACCAGCGCTGCCATCAGAACGTCTTGGCTATTGGCA

>6958 len=157 tot-seq=1

GGAGCTGCTGGCTCTGAATCTGGCTTGGGAAGGCTGTTGAATCTGGACACAGAGCTGCGC  
ACCAATCCTTTAGGGATATAGGAGAGGCTCTCCCGCCGACGGATGCTGAAGCCAGCATCA  
TGGTGCTCTGCATTTTCATAGTAGTGCTTAATTTTGT

>6959 len=157 tot-seq=1

TGGTCCAGTGCTTTGTGTAGGACATTTGGAGAATGAACGATAGAGCCCGCATTTAAGATG  
TCGAGAGTTGGTACCAAGACCTAAACCCAAAGAAAATTTTATTGACTGGGGGGAGGG  
GGATTCTTTAACTCCTCAAATTGTTGATTAATTTTCT

>6960 len=157 tot-seq=1

TGGGGAATATTGCACAATGGGCGAAAGCCTGATGCAGCGACGCCGCGTGAAGGATGAAGT  
ATTCGGATCGTAAAGCTCTGTTGTTAAGGAAGAACGAGTGTGAGAATGGAAAGTTCATA  
CTGTGACGGTACTTAACCAGAAAGGGACGGCTAACTA

>6961 len=157 tot-seq=1

GGGACCACTAGTGCTCACACGGCAGGGAACCACTTCTACTCTTTGGCCTGTGCTTCTCAG  
CAGTATCTTTAGCGTCTACTCTGCCAAAGGACACAGGAAATGCTCTCTCTGAGTCTCCCA

GCCAAGTCTTACTTTACTTGACTGGCTCAACCACCGC

>6962 len=157 tot-seq=1

GAATCTTCGGCAATGGACGGAAGTCTGACCGAGCAACGCCGCGTGAGTGAAGAAGGTTTT  
CGGATCGTAAAATAAGTTATTAAGAAGAACGTTGGTAGGAGTGGAAAAACAACCAAGT  
GACGGTAACTAACCAGAAAGGGACGGCTAACTACATG

>6963 len=157 tot-seq=1

CTGTCAATCGCATGTCCCCAAGCCTCCATCAATGTGATGGCCAGGGACTTGTGTGGGTC  
ACAGACTCAAACCTGAACTTCTGCCGAAGATATCAAGAAGGAGAAGCCCTCTATTTACTG  
AAGTCTCTGACTGTAATAACTGAGTGAATTGATATCT

>6964 len=157 tot-seq=1

GTCAGAAAAACCCGGAAGGAAGGAAGCTGGACAGACAGACAGTAGCTGATCCTAGCTTCA  
TTGCTCCAGAGAGACACCCTCCAGACTCCTAGACTTCAAGGGACACTATCCTTCTCAGAA  
GGAGAGAGCAGCCCTCTGTCTCTTCTGAAACCAAATT

>6965 len=157 tot-seq=1

GAATCTTCCACAATGGACGCAAGTCTGATGGAGCAACGCCGCGTGAGTGAAGAAGGGTTT  
CGGCTCGTAAAGCTCTGTGATTCGGGACGAAAGATAAGCAGACGAATAATCTGCATAAGT  
GACGGTACCGAAAAAGCAAGCCACGGCTAACTACGTG

>6966 len=157 tot-seq=1

TGGGGAATATTGCACAATGGGGGAAACCCTGATGCAGCGACGCCGCGTGAGGGAAGAAGG  
TCTTCGGATTGTAACTCCTGTTGGTGAAGAAGGACAGGGGTAGTAACTGACCTTTGTTT  
GACGGTAATCAATTAGAAAGTCACGGCTAACTACGTG

>6967 len=157 tot-seq=1

ATGCCAGGGAGACCCAAGAAAGAGTCAGGTTAGGGAGCAGTGAAAGTGAGGAGGGAAGA  
CAATTCTGTGA ACTCTGTA ACTCTTAAAATTTTTGAAA ACTCCATCGTTAAACA ACTTTT  
AAAAGAAATAACTAAATTTTCAAATGAGTAAGCAGTG

>6968 len=157 tot-seq=1

CTCCGGTCCCACCTTCAGGGTTCTCTCAAGGCCAGCCCTGGGCCAGGTGGGAGCCACCC  
TGACCCTTAACCCTGTGACTGACCTATCCAAGACCAGGTCCTGTGAAGCCACAAGGG  
CAGGGGCTCCTGTGCCTGATGAAACCCGTAACCCTCC



>6969 len=157 tot-seq=1

AGGCGGAGCTTGTAGTGAGCCAAGATCGTGCCACTGCACTCCAGCCTGGGTGACAGCGAG  
ACTCTGTCTCAAAAAAAAAAGAAAAAGAAAAAGAAAGAAAAGAAATAAAAAATAATA  
AAAAGATGGCCAGGCGCAGTGGCTCACACCTTTAATC

>6970 len=157 tot-seq=1

CGTCCCCTCCTCTCCCAGCCGCAAGTGCTGGGACACTCGGTAGTAGAAACCGGCCATGG  
TGCCTGTATTTACCCCATAGGCATCCGCAAATGCTATAAACCCAGGGCTCCCCTCCCCAC  
CCCCACTCCACTCTGAGCACTGGTTGTTAAATATTCA

>6971 len=157 tot-seq=1

AGGGAGAGGACGCCTATGAATCTGAACACACCCACCATGCTGGAACACTTGACCGCCAC  
CCAGACTCCGCAAATCACAGGCCAGCCTGAGGCCGTAGCTGGGGACCGATCCCATTAGT  
AGGAGGCCACGCTGAGAGCCAGGTTTGGCCCCTGGAG

>6972 len=157 tot-seq=1

TAGGTTGTTTCACTGAGAATTATGAACAAGATAGTTATCCCTGGAGAGCTTATCTAGGAA  
GGGTATCCTGGACAGGGCTGAAATTTCTGCTAGTAAAATGATTGTAGGCTCAATGTATC  
CAAGAGACTTCATTAGCTCTCCTCATTTGCTGGTATT

>6973 len=157 tot-seq=1

AAGGAGACATCAAATGGTGCAGCCTGCAGTCCCAGCAGTGA CTCTCAATGGGACTGCAT  
GCATTACCATGGTTCCTGCAGGAACTACTGCCAGCTGATTGTCAGTGGAAGTGTGGACA  
CAGGCTATCCTCATTTCTCCTACCCTTATCTGGTTTC

>6974 len=157 tot-seq=1

GAATCTTCCACAATGGACGAAAGTCTGATGGAGCAACGCCGCGTGAGTGAAGAAGGGTTG  
CGGCTCGTAAAGCTCTGTTGTAAGAGAAGAACGTGTGTGAGAGTGGAAAGTTCACACAGT  
GACTGTAAC TTTCCAGAAAGGGACGGCTAACTACGTG

>6975 len=158 tot-seq=1

TAGGGAATTTTCGTCAATGGAGGGA ACTCTGAACGAGCAATGCCGCGTGAGTGAAGAAGG  
CCTTCGGGTCGTAAAGCTCTGTTGCGGGGGAAAAAGGCAGCATCAGGAAATGGGTGCTG  
ACTGATGGTGCCCCGCCAGAAAGTCACGGCTAACTACG

>6976 len=158 tot-seq=1

TGGGGAATATTGCACAATGGGCGAAAGCCTGATGCAGCAACGCCGCGTGAACGATGAAGG  
CCCTCGGGTCGTAAAGTTCTGTTGTAAGGGAAGAACAAGTGCCGCAGGCAATGGCGGCAC  
CTTGACGGTACCTTGCGAGAAAGCCACGGCTAACTACG

>6977 len=158 tot-seq=1

TTCAGACTCTGCAGTGAGGAAGAGCAGGGCAGGGTTATTCCTGTCCAGGCCTCAGTGGGA  
TCTTATAAACTTGGACTCCTCAGGGATAAGGTGCTCAGAGAGCCAAGTGCACCCACATGA  
GGAGGTCTACATGGAGTACTACAAGGCAAAGCTTGCC

>6978 len=158 tot-seq=1

TAGGGAATCTCCGCAATGGGCGAAAGCCTGACGGAGCAACGCCGCGTGAGTGATGAAGG  
TCTTTGGATCGTAAACTCTGTTGTTAGAGAAGAACAAGGATGAGAGTAACTGTTTCATCC  
CTTGACGGTATCTAACCAGAAAGCCACGGCTAACTACG

>6979 len=158 tot-seq=1

TGGGGAATTTTGGACAATGGGCGCAAGCCTGATCCAGCAATGCCGCGTGTGAAGAAGGCC  
TTCGGGTTGTAAAGCACTTTTGTCCGAAAGAACACCTCCTGGTTAATACCCGGGGGGGA  
TGACGGTACCGAAAGAATAAGCACCGGCTAACTACGTG

>6980 len=158 tot-seq=1

GAAGCAACGCGAAGAACCTTACCAAGTCTTGACAGCCCTCTGACCGGAACTTAACCGTTC  
CTTTCCTTCGGGACAGAGGAGACAGGTGGTGCATGGTTGTCGTCAGCTCGTGTCTGAGA  
TGTTGGGTTAAGTCCCGCAACGAGCGCAACCCCTATCC

>6981 len=158 tot-seq=1

TGGGGAATATTGCACAATGGGCGCAAGCCTGATGCAGCCATGCCGCGAGTGATGAAGGTC  
TTCGGATCGTAAACTCTGTTATTAGGGAAGAACAATGTGTAAGTAACTATGCACGTCT  
TGACGGTACCTAATCAGAAAGCCACGGCTAACTACGTG

>6982 len=158 tot-seq=1

TGGGGAATATTGCACAATGGGCGAAAGCCTGATGCAGCGACGCGTGAGTGAAGACGGCCT  
TCGGGTTGTAAACTCTGTGATTCGGGACGAAAGATAAGCAGACGAATAATCTGCATAAG  
TGACGGTACCGAAAAAGCAAGCCACGGCTAACTACGTG

>6983 len=158 tot-seq=1

GGGAATTTTGCACAATGGGGGAAACCCTGATGCAGCGACGCCGCGTGAGTGAAGAAGGTT

TTCGGATCGTAAAGCTCTGTTGTTAGAGAAGAAAGTGCCTGAGAGTAACTGGTCACGTTT  
CGACGGTATCTAACCAGAAAGCCACGGCTAACTACATG

>6984 len=158 tot-seq=1

TGGGGAATATTGGACAATGGGGGGAACCCTGATCCAGCCATGCCGCGTGTGTGAAGAAGG  
CCTTTTGGTTGTAAAGCACTTTAAGCGAGGAGGCTACCGAGATTAATACTCTTGGATAGT  
GGACGTTACTCGCAGAATAAGCACCCGGCTAACTCTGTG

>6985 len=158 tot-seq=1

TGGGGAATCTTGCACAATGGGCGAAAGCCTGATGCAGCGACGCGTGAGTGATGACGGTCT  
TCGGATTGTAAAGCTCTGTTAATCGGGACGAATGGTCGGTGTGCAAATAGTGCATGGACA  
TGACGGTACCGGAATAGAAAGCCACGGCTAACTACGTG

>6986 len=158 tot-seq=1

TGAGGAATATTGGTCAATGGACGCAAGTCTGAACCAGCCATGCCGCGTGCAGGATGAAGG  
TCTTCGGATTGTAAACTGCTTTTGTGAGGGAAGAAAAGGTCTGTGTTAATACCATAGACT  
GCTGACGGTACCTGAAGAATAAGCACCCGGCTAACTACG

>6987 len=158 tot-seq=1

TGGGGAATCTTGCACAATGGGCGAAAGTCTGACCGAGCAACGCCGCGTGAGTGAAGAAGG  
TTTTCGGATCGTAAAGCTCTGTTGTAAGAGAAGAACGAGTGTGAGAGTGGAAAGTTCACA  
CTGTGACGGTATCTTACCAGAAAGGGACGGCTAACTAC

>6988 len=158 tot-seq=1

TAGGGAGTATTCGGCAATGGGCGCAAGCCTGACCGAGCAACGCCGCGTGAATGATGAAGA  
TCTTCGGATTGTAAAATTCTGTGATTAGAGAAGAATGACGTAGTGAGGAAATGCATTACG  
TTTGACGGTATCTATTTAGAAAGCCACGGCTAACTACG

>6989 len=158 tot-seq=1

CGGGGAATTTTGGACAATGGGCGAAAGCCTGATCCAGCAATGCCGCGTGAGTGAAGAAGG  
CCTTCGGGTTATAAAGCTCTTTTGTGAGGGAAGAAACGGTGAAGGCTAATATCCTTCGCT  
AATGACGGTACCTGAAGAATAAGCACCCGGCTAACTACG

>6990 len=158 tot-seq=1

GATCCCCTCCTCCTTCCATCTACACCCAGGCTCTCCAGCCTCCTCCTAGTGGCCTG  
CTGCTGTGCAGGACACGGTCTGTCTCATCTGCACGGTGGCCTCAGCCTCCTAAAGGGTC

TCCCTGCCCTCTATGTCCTGTGCTGGCCACGTTCCAC

>6991 len=158 tot-seq=1

TTTTTTTTCAAGCAGAAGACGGCATAACGAGATACCTCAGTACTGGAGTCAGACGTGTG  
CTCTCCGATCTCCTACGGGAGGCAACAGATAAGGAGAAGGCTCGTCCTCCAGAACAGAG  
GCAGCAGCTCCAGCAGCCCCAGGGGGCTCTAGCCACAG

>6992 len=158 tot-seq=1

TTTTCAAGCAGAAGACGGCATAACGAGATACCTCAGTACTGGAGTGCAGACGTGTGCTC  
TTCCGATCTCCTAAGGGAGGCAGCAGTAGGCCTTTCTAACAACAAGCACGTACACCCCC  
TGAGTCTGTAAAATACCAAAACAATGACGACAGCACCA

>6993 len=158 tot-seq=1

TGGGAATATTGCACAATGGGCGAAAGCCTGATGCAGCAACGCCGCGTGAGCGATGAAGG  
CCTTCTGATTGTAAAGTTCTTTATTTAGGAAAAAAGCGCGCTAGGAAATGAGCGCGCC  
TTGATGGTACTAATTGAATAAGTGACAGCTAACTATGT

>6994 len=158 tot-seq=1

CGTCTCAACAGCAATGGTTGCAGCTGGTTCGCACATAGATCGTCAAGAATTTGGCTAC  
CCGAAAACGCAGAAACGATTTGTACTCCAGCGCCTGCACGGGCCACTCGGCAACCTGCTC  
AAGAAACTGTTTGGTCGTCTGTTCCGGTGAAGGTGAGTT

>6995 len=158 tot-seq=1

TCCCCTCCCGTGCAGCATGTCTAACACAGAACTCAGAATCGTCCCCAAACCAACTCTCCC  
CTCTGCGTTTTCTTCTTGTGTTGGCACCATAATTATCTGCGTTTCGGGCTCAGAAATG  
GAGCGCTTCACTTCCCCTCCCCACCATTCCTCCTC

>6996 len=158 tot-seq=1

TAGGAATTTTCGGCAATGGGGGAAACCCTGACCGAGCAACGCCGCGTGAGTGAAGAAGG  
TTTTCGGATCGTAAACTCTGTTGTTAGAGAAGAACAAGGATGAGAGTAACTGTTTCATCC  
CTTGACGGTATCTAACCAGAAAGCCACGGCTAACTACG

>6997 len=158 tot-seq=1

TTGTGGGGTAGGAGGAGGGGAGGGACTCTGGGAATTGTGGTCGTTCACTTAACTCTTAGT  
GTGAATAAGGATTCTGAGGCTTATGCAGGTCAGGAAAAGGGGAGAGAGGATCAGGTATGT  
GGTCTTCTGCGGGGTAGGAATGGCTGGGAGAAGGGAGA

>6998 len=158 tot-seq=1

TGGGGAATATTGCGCAATGGGGGAAACCCTGACGCAGCGACGCGTGAGTGAAGAAGGTTT  
TCGGATCGTAAAGCTCTGTTGTTAGAGAAGAACGTTGGTAGGAGTGGAAAATCTACCAAG  
TGACGGTAACTAACCAGAAAGGGACGGCTAACTACGTG

>6999 len=158 tot-seq=1

TTTTTTTTTTCAAGCAGAAGACGGCATAACGAGATAAGTTGGTACTGGAGTTCAGACGTG  
TGCTCTCCGATCCCCTACGTGGGGCAGCAGTGACAAAATTAAGCCATAAACGAAAGTT  
TGACTAAGTTATATTAATTAGGGTTGGTAAATCTCGTG

>7000 len=158 tot-seq=1

ACAGACACCTCATAACAGGAGAGCTCTGGCTGGCATCTGGTGGGTGCCCTCTAGGACGAA  
GCTTCCAGAGGAGGGAACAGGCAGCAATTACTGCTATTCTGCAACTTCTGCTGGTGATAC  
CCAGGCAAACAGGGTCTAGAGTGGACCTCCAGCAAAC

>7001 len=159 tot-seq=1

TGGGGAATTTTGCACAATGGGGGAAACCCTGATGCAGCGACGCCGCGTGATTTAGAAGGC  
CTTCGGGTTGTAAAGACTTTTGTACAGGGAAGAAAAGGCTGTTGCTAATACCAACAGCTG  
ATGACGGTACCTGAAGAATAAGCACCGGCTAACTACGTG

>7002 len=159 tot-seq=1

CAGGTGGATTTCTGTGAGTCAGTCCAGCCTGGTCTACAGCGTGAGTCCCAAGACAGCCAG  
AGCTACATTGAAAGACCCTGTCTGGGGTGGGGGAAAAAAAAGTGTTGATTTACTTCATAT  
AAATTGCTTTTAGGTTTTGCATTCCTTAGTCTTATAAAC

>7003 len=159 tot-seq=1

TGGGGAATTTTGCACAATGGGGGAAACCCTGATGCAGCGACGCCGCGTGATTTAGAAGGC  
CTTCGGGCTGTAAAAATCTTTTGTATGGGAAGAAGGACAGGGGTAGTAACTGACCTTTGT  
TTGACGGTAATCAATTAGAAAGTCACGGCTAACTACGTG

>7004 len=159 tot-seq=1

TAGGGAATCTCCACAATGGGCGAAAGCCTGATGGAGCAACGCCGCGTGGGTAAAGAAGG  
TCTTCGGATCGTAAACCCTGTTGTTAGAGAGGAAAGTGCATAGAGTAACTGTTATGCGT  
GTGACGGTATCTAACCAGAAAGCCACGGCTAACTACGTG

>7005 len=159 tot-seq=1

TGGGGAATTTTGCACAATGGGGGAAACCCTGATGCAGCGACGCCGCGTGATTTAGAAGGC  
CTTCGGATCGTAAAGCTCTGTTGTTAGAGAAGAACGTTGGTAGGAGTGAAAAATCTACCA  
AGTGACGGTAACTAACCAGAAAGGGACGGCTAACTACGT

>7006 len=159 tot-seq=1

TAGGGAATCTTCCACAATGGGCGCAAGCCTGATGGAGCAACGCCGCGTGAGTGAGGAAGG  
CCCTCGGGTCGTAAAGCTCTGTTGCCAGGGAAGAATAAGCATATGTAACTGCATATGCG  
ATGACGGTACCTGAGAAGAAAGCCCCGGCTAACTACGTG

>7007 len=159 tot-seq=1

TGGGGAATTTTGCACAATGGGGGAAACCCTGATGCAGCGACGCCGCGTGATTTAGAAGGC  
CTTCGGGTTGTAAAGTGCTGTTATAAGGGAAGAACATTTGCAATAGGAAATGATTGCAGA  
CTGACGGTACCTTGTGAGAAAGCGATGGCTAACTATGTG

>7008 len=159 tot-seq=1

TGGGGAATATTGCACAATGGGCGAAAGCCTGATGCAGCGACGCCGCGTGAGGGATGACGG  
CCCTCGGGTTGTAAAGCACTTTCAGTGAGGAAGAACGCCTGGTGGTTAATACCCATCAGG  
AAAGACATCACTCAAGAAGAAGCACCGGCTAACTCCGTG

>7009 len=159 tot-seq=1

TCGGGAATTTTGGGCAATGGGCGAAAGCCTGACCCAGCAACGCCGCGTGAAGGATGAAGT  
TTTTCGGATCGTAAACTCTGTTATTAGGGAAGAACAATGTGTAAGTAACTATGCACGT  
CTTGACGGTACCTAATCAGAAAGCCACGGCTAACTACGT

>7010 len=159 tot-seq=1

TAGGGAATCTTCCACAATGGGCGCAAGCCTGATGGAGCAACACCGCGTGAGTGAAGAAGG  
GTTTCGGCTCGTAAGCTCTGTTGTTGGTGAAGAAGGACAGGGGTAGTAACTGACCTTTGT  
TTGAGGGTAATCAATTAGAAAGTCATGGCTAACTACGTG

>7011 len=159 tot-seq=1

TGGGGAATTGTTTCGCAATGGGCGCAAGCCTGACGACGCAACGCCGCGTAGAGGATGAAGG  
TCTTCGGATTGTAAACTCCTGTTGATCGGGACGAAAAGCTTCGACCTAACACGTCGGAGA  
CTGACGGTACCGGTTGAGGAAGCCACGGCTAACTCTGTG

>7012 len=159 tot-seq=1

TGGGGAATTTTGCACAATGGGGGAAACCCTGATGCAGCGACGCCGCGTGATTTAGAAGGC

CTTCGGGTTGTAAAGTACTTTTCAGCGGGGAGGAAGGGAGTAAAGTTAATACCTTTGCTCA  
TTGACGTTACCCGCAGAAGAAGCACCGGCCAACTCCGTG

>7013 len=159 tot-seq=1

TGGGGAATTGTTTACAATGGGCGCAAGCCTGATGACGCAACGCCGCGTGGAGGATGAAGG  
TCTTCGGATTGTAAACTCCTGTTGCTCGGGACGAAATGCTCCGACCTAATACGTCGGAGT  
TTGACGGTACCGAGTGAGGAAGCCCCGGCTAACTCTGTG

>7014 len=159 tot-seq=1

TAGGGAATCTTCCACAATGGGCGCAAGCCTGATGGAGCAACGCCGCGTGAGTGAGGAAGG  
CTTTCGGGTCGTAAAGCTCTGTTGCCAGGGAAGAATAAGGATGTGTTAACTGCACATTCG  
ATGACGGTACCTGAGAAGAAAGCCCCGGCTAACTACGTG

>7015 len=159 tot-seq=1

TGGGGAATATTGGACAATGGGCGCAAGCCTGATCCAGCCATGCCGCGTGAGTGATGAAGG  
CCTTCGGGTCGTAAAGCTCTGTGGGGAGGGACGAACCGCTTTTGGTGCATAGCCAAGAGC  
ATGACGGTACCTCCTTAGCAAGCACCGGCTAACTTCGTG

>7016 len=159 tot-seq=1

TGGGGAATATTGCGCAATGGGGGAAACCCTGATGGAGCAATACCACGTGAACGATGAAGG  
TCTTCTGATTGTAAAGTCTTTTATTTAGGAAAAAAGCGTGCTAGGAAATGAGCGCGCC  
TTGATGGTACTAATTGAATAAGTGACAGCTAACTATGTG

>7017 len=159 tot-seq=1

GAGAGAAAATCTCTGCTCTTCTAACTGCAGTCCCTCTCCATGCATTGCCTGGCCTCAGGA  
TTGCTCTCTGGGTGATCTTGGGAGAGAGCTGGGGTCTTTTACTAGGTACATTGTAGCTC  
CATTAGGATATTCTAGAATGTTTTACTAGTTTTCTCATT

>7018 len=159 tot-seq=1

TGGGGAATTGTTTACAATGGGCGCAAGCCTGATGACGCAACGCCGCGTGGAGGATGAAGG  
TCTTCGGATTGTAAACTCCTGTTGCCCGGGACGAAAAGCTTCGACCTAACACGTCGAGGT  
CTGACGGTACCGGGTGAGGAAGCCCCGGCTAACTCTGTG

>7019 len=159 tot-seq=1

TGGGGAATTTTGGACAATGGGGGCAACCCTGATCCAGCAATGCCGCGTGAGTGAAGAAGG  
CCTTCGGGTTGTAAAGCTCTTTTGTGAGGGAAGAAACACCGGCTCTAACACAGTCCGGGA

ATGACGGTACCTGAAGAATAAGCACCCGGCTAACTACGTG

>7020 len=159 tot-seq=1

TGGGGAATCTTGC GCAATGGGCGAAAGCCTGACGCAGCGACGCCGCGTGAGTGATGAAGG

CCTTCGGGTTGTAAAGCTCTGTGGGGAGAGACGAATAAGTGCCGGCTAATACCTTGCATG

ATGACGGTATCTCCTTAGCAAGCACCCGGCTAACTCTGTG

>7021 len=159 tot-seq=1

TAGGGAATCTTCCACAATGGACGAAAGTCTGATGGAGCAATGCCGCGTGAGTGATGAAGG

ATTTTCGGTTCGTAAACTCTGTTGCGAGGGAAGAACAAGTGAAAAGTAACTACTTACACC

TTGACGGTACCTCGTTAGAAAGCCACGGCTAACTACGTG

>7022 len=159 tot-seq=1

ACGTAAAGGCGGAGAGGCGTGAGCAAGCCCGGTGGGGCAGGGGTTAGCAGTGGAATTCGT

CAAGGACCGCTTCTCAGAGAGGGCTAGTAGTGAGCCTGACTTGGGAGCAGTGGCTGGACA

TTTGAGGGAATGACACGAACCAAGGCACAGAGAGAGGAA

>7023 len=159 tot-seq=1

TAGGGAATCTTCCGCAATGGGCGAAAGTCTGACGGAGCAACGCCGCGTGAGTGAAGAAGG

TTTTTCGGATCATAAAACTCTGTTGTGAGGGAAGAACAAGTACCAGCTAACTACTGGTACC

TTGACGGTACCTCACCAGAAAGCCACGGCTAACTACGTG

>7024 len=159 tot-seq=1

TAGGGAATCTTCCGCAATGGACGGAAGTCTGACCGAGCAACGCCGCGTGAGTGAAGAAGG

TTTTTCGGATCGTAAAGCTCTGTTGTCGGGGACGAACGTGGAGACGGCGAATAGCCGTTTC

CAATGACGGTACCTGACGAGGAAGCCACGGCTAACTACG

>7025 len=159 tot-seq=1

GAAGTGAGGAATATGGGTAAATGGGAGAGATAATGAAAAAGAAAAGCCGCGTGAGGGAAG

ACGGCCCTATGGGTTGGAAACCTCTTTTGTCTGGAGAACAACCCGGGACGTGTCCCGGA

CTGCGTGTATCCGAAGAAAAGCATCGGCTAACTCCGTG

>7026 len=159 tot-seq=1

TAGGGAATCTTCCGCAATGGACGAAAGTCTGACCGAGCAACGCCGCGTGAGTGAAGAAGG

TTTTTCGGATCGTAAACTCTGTTGTCAGAGAAGAACAAGGATAAGAGTAACTGCTTATCC

CCTGACGGTATCTGACCAGAAAGCCACGGCTAACTACGT



>7027 len=159 tot-seq=1

TGGGGAATCTTGCACAATGGGCGAAAGCCTGACGCAGCGACGCCGCGTGAGCGATGAAGG  
CCTTCGGGTTGTAAAGCTCTGTGGGGAGGAAAGAATAAGGGTTGGCTAATATCCAGCTCG  
ATGACGGTACCTCCTTAGCAAGCACCGGCTAACTCTGTG

>7028 len=159 tot-seq=1

TGGGGAATATTGCACAATGGGGGAAACCCTGATGCAGCAACGCCGCGTGAGTGATGAAGG  
CCTTCGGGTTGTAAAGTACTTTTCAGTCGTGAGGAAGGGGGTATCGTTAATAGCGGTATTC  
TTTGACGTTAGCGACAGAAGAAGCACCGGCTAACTCCGT

>7029 len=159 tot-seq=1

ATCACTAACTCTGAAGCTCGCGCTCGGTGGCTTCTGAAATTTCCCTTCCAACCTCCCA  
CCAGTCAGCCTACTCTCCACCTCCCTGAGAAGCAAGCTCAGCAGCCCATCTCTTGAGAAG  
GTGACTTGAAAGTGGGAGAAAGTCAAGAAAGAGTCTAGG

>7030 len=159 tot-seq=1

CTGACATGAAGCTGGGGTGTCTTCTGCCTGCTGAGAGTTGGGGAGGTGGCAAGGTCAGAG  
GCTTGAGGGAAGTGAAGTGGGCCTCACTCAACTGGAGCCTGGCCTGCTCTGGGACAAATT  
GTTCAGGTTCCAAACTGACTCAGAGAACATTCACCCACCT

>7031 len=159 tot-seq=1

TGGGGAATTTTGCACAATGGGGGAAACCCTGATGCAGCGACGCCGCGTGATTTAGAAGGG  
TTTCGGCTCGTAAAGCTCTGTTGTTGGTGAAGAAGGACAGGGGTAGTAACTGACCTTTGT  
TTGACGGTAATCAATTAGAAAAGTCACGGCTAACTACGTG

>7032 len=159 tot-seq=1

GACGGCAGGGACAGAGCTCAGGAGGCACGCAGCGTTCCTCCTAGCAGAGGCCAGGGACAA  
AGGGCTCCATGGAGGACTGCCTGGTGGCCCCCTCCCTGCCAGTTACACCCAGCCAGGGACC  
AGGGCAGGGCACTGGCTAGCGGAGCCCCTCCAGACATA

>7033 len=159 tot-seq=1

GGGGAATTTTGGACAATGGGGGCAACCCTGATCCAGCCATGCCGCGTGATGATGAAGGT  
CTTCGGATTGTAACTACTTTTATCAGGGAAGAAAAGGTCTATGTTAATACCATAGTCTG  
CTGACGTTACCTGAAGAATAAGCACCGGCTAACTACGTG

>7034 len=159 tot-seq=1

TGAGGAATATTGGTCAATGGGCGCTAGCCTGAACCAGCCAAGTAGCGTGCAGGATGACGG  
CCCTATGGGTTGTAAAGCTCTGTGATTCGGGACGAAAGGCCATATGTGAATAATATATGG  
AAATGACGGTACCGAAAAAGCAAGCCACGGCTAACTACG

>7035 len=159 tot-seq=1

TAGGGAATATTCCACAATGAGCGAAAGCTTGATGGAGCGACACAGCGTGCACGATGAAGG  
TCTTCTGATTGTAAAGTTCTTTATTTAGGAAAAAAGCGCGCTAGGAAATGAGCGCGCC  
TTGATGGTACTAATTGAATAAGTGACAGCTAACTATGTG

>7036 len=159 tot-seq=1

TTTTTTTTTCAAGCAGAAGACGGCATAACGAGATTATTCGGTGACTGGAGTTCAGACGTG  
TGCTTTTCCGATCTCCTACGGGGCAGCAGATAAGGAGAAGGCTCGTCCTCCAGAACAGA  
GGCAGCAGCTCCAGCAGCCCCAGGGGGCTCTAGCCACAG

>7037 len=159 tot-seq=1

CTATCGCACCCTGCACTCCAGCCTGGGCAACAAGAGCGAAACCCTCAAAAAAAAAAAAAA  
TCTGTGAAGGAAGGTCAAGAAGGAAAGAGGAAACACACACACATACACACACATGCACAC  
ACACACATAAAACATTCATGAACATTAGGTAGTTACATG

>7038 len=159 tot-seq=1

TGGGGAATTTTGGACAATGGGCGCAAGCCTGATCCAGCCATGCCGCGTGCGGGAAGAAGG  
CCTTCGGGTTGTAAACCGCTTTTGGCAGGAACGAAACGGCGATTCTAATACGAGTCGTT  
AATGACGGTACCTGCAGAATAAGCACCGGCTAACTACGT

>7039 len=159 tot-seq=1

TGGGGAATCTTGCACAATGGGCGAAAGCCTGACGCAGCAACGCCGCGTGAGGGAAGAAGG  
CTTTCGGGTTGTAAACCTCTTTCAGGAGGGACGAAGCTTCCGAGGTTAATAGCCTACGGG  
GTGACGGTACCTCCAGAAGAAGCCCCGGCTAACTACGTG

>7040 len=160 tot-seq=1

TGGGGGATATTGCACAATGGGGGAAACCCTGACCGAGCAACGCCGCGTGAGGGAAGAAGT  
ATTTCCGGTATGTAAACCTCTGTTATAAAGGAAGAACGGTATGAATAGGAAATGATTCATA  
AGTGACGGTACTTTATGAGAAAGCCACGGCTAACTACGTG

>7041 len=160 tot-seq=1

TAGGGAATCTTCCACAATGGACGAAAGTCTGATGGAGCAACGCCGCGTGAACGAAGAAGG

TCTTCGGATTGTAAAGTTCTGTTATAGAGGAAGAACGGTGTACGTAGGAAATGACGTACA  
AGTGACGGTACTCTGTGAGGAAGCCACGGCTAACTACGTG

>7042 len=160 tot-seq=1

TAGGGAATTTTCGTCAATGGGGGAAACCCTGAACGAGCAATGCCGCGTGAGTGAAGAAGG  
CCTTCGGGTCGTAAAGGACTTTTGTCCGGGAAGAAAAGCGCGACGTTAATACTATTGCGT  
GCTGACGGTACCGGAAGAATAAGCACCGGCTAACTACGTG

>7043 len=160 tot-seq=1

TAGGGAATCTTCGGCAATGGGCGAAAGCCTGACCGAGCAACGCCGCGTGAATGAAGAAGG  
CCTTCGGGTCGTAAAGCTCTGTTGCGGGGAAAAAAGGCAGCATCAGGAAATGGGTGCTG  
ACTGATGGTGCCCCGCCAGAAAGTCACGGCTAACTACGTG

>7044 len=160 tot-seq=1

TAGGGAATTTTCGTCAATGGGCGCAAGCCTGAACGAGCGATGCCGCGTGAGTGAAGAAGG  
CCTTCGGGTTGTAAAGGACTTTTGTCCGGGAAGAAAAGCGCGATGTTAATACCATTGCGT  
GCTGACGGTACCGGAAGAATAAGCACCGGCTAACTACGTG

>7045 len=160 tot-seq=1

TGGGGGATATTGCACAATGGGGGAAACCCTGATGCAGCGACGCCGCGTGGGCGATGGAGT  
GCTTCGGGTTGTAAAGGACTTTTGTCCGGGAAGAAAAGCGCGATGTTAATACCATTGCGT  
GCTGACGGTACCGGAAGAATAAGCACCGGCTAACTACGTG

>7046 len=160 tot-seq=1

TGGGGAATATTGCACAATGGGGGAAACCCTGATGCAGCAACGCCGCGTGAGTGAAGAAGG  
TTTTCGGGTCGTAAAGCTCTGTTGCGGGGAAAAAAGGCAGCATCAGGAAATGGGTGCTG  
ACTGATGGTGCCCCGCCAGAAAGTCACGGCTAACTACGTG

>7047 len=160 tot-seq=1

CTGCGCTCGGACATTGGGGTAAAGCTTGGGAGAGTTAAGAGGGGGCTGTTTGCTGGGATG  
AAACTGTCCACAGCTCGGCTGGGCCATCTTCTTACTCAGGCTGACCCTAATTAACATGG  
AGCAGACAGACTGGCTCCCAAGAAGATTGGCTATGTGTCC

>7048 len=160 tot-seq=1

TGGGGGATATTGCACAATGGGGGAAACCCTGATGCAGCGACGCCGCGTGGGTGAAGAAGT  
ATTCGGTATGTAAAGTACTTTTACGCGGGGAGGAAGGGAGTAAAGTTAATACCTTTGCTC

ATTGACGTTACCCGCAGAAGAAGCACCCGGCTAACTCCGTG

>7049 len=160 tot-seq=1

TAGGGAATCTTCCGCAATGGGCGAAAGCCTGACGGAGCAACGCCCGTGAGTGATGAAGG

TCTTCGGATCGTAAAGGACTTTTGTGAGGGAAGAAAAGGCTGTTGCTAATATCGACAGCT

GATGACGGTACCTGAAGAATAAGCACCCGGCTAACTACGTG

>7050 len=160 tot-seq=1

TGGGGAATATTGCACAATGGGGGAAACCCTGATGCAGCGACGCCCGTGAGTGAAGAAGT

ATTCGGGTTGTAAAGGACTTTTGTGAGGGAAGAAAAGGCTGTTGCTAATACCAACAGCT

GATGACGGTACCTGAAGAATAAGCACCCGGCTAACTACGTG

>7051 len=160 tot-seq=1

TGGGGAATATTGCACAATGGGGGAAACCCTGATGCAGCAACGCCCGTGAGTGAAGAAGG

TTTTCGGATTGTAAAGTTCTGTTATAGAGGAAGAACGGTGTACGTAGGAAATGACGTACA

AGTGACGGTACTCTGTGAGGAAGCCACGGCTAACTACGTG

>7052 len=160 tot-seq=1

TGGGGAATCTTGCACAATGGGCGAAAGCCTGATGTAGCGACGCCCGTGCGGGATGAAGG

CCCTCGGGTCGTAAAGTTCTGTTGTAAGGGAAGAACAAGTGCCGCAGGCAATGGCGGCAC

CTTGACGGTACCTTGCAGAAAAGCCACGGCTAACTACGTG

>7053 len=160 tot-seq=1

TGGGGAATTTTGGACAATGGGCGCAAGCCTGATCCAGCCATGCCCGTGCTCTGAAGAAGG

CCTTCGGGTTGTAAAGGACTTTTGTGAGGGAAGAAAAGGCTGTTGCTAATATCGACAGCT

GATGACGGTACCTGATTAAGAAGCCCCGGCTAACTACGTG

>7054 len=160 tot-seq=1

TGGGGAATTTTGGACAATGGGCGCAAGCCTGATCCAGCCATGCCCGTGCTCTGAAGAAGG

CCTTCGGGTTGTAAAGGACTTTTGTGAGGGAAGAAAAGGCGATCTCTAATACAGGTCACT

CATGACGGTACCTGAAGAATAAGCACCCGGCTAACTACGTG

>7055 len=160 tot-seq=1

TGGGGGATATTGCACAATGGGGGAAACCCTGAACGAGCAATGCCCGTGAGTGAAGAAGG

TCTTCGGATCGTAAAGCTCTGTTGTAAGTGAAGAACGGCCATAGAGGAAATGCTATGGG

AGTGACGGTAGCTTACCAGAAAAGCCACGGCTAACTACGTG

>7056 len=160 tot-seq=1

TGGGGAATTTTGGACAATGGGCGCAAGCCTGATCCAGCAATGCCGCGTGAGTGAAGAAGG  
CCCTCGGGTTGTAAAGCTCTTTTGTGAGGGAAGAAAAGGCTGTTGCTAATACCAACAGCT  
GATGACGGTACCTGAAGAATAAGCACCGGCTAACTACGTG

>7057 len=160 tot-seq=1

TAGGGAATTTTCGTCAATGGGGGAAACCCTGAACGAGCAACGCCGCGTGAGTGAAGAAGG  
CCCTCGGGTTGTAAAGCACTTTCAGTGAGGAAGAACGCCTGGTGGTTAATACCCATCAGG  
AAAGACATCACTCACAGAAGAAGCACCGGCTAACTCCGTG

>7058 len=160 tot-seq=1

TGGGGAATATTGCACAATGGGGGAAACCCTGATGCAGCGACGCCGCGTGGAGGAAGAAGG  
TCTTCGGATTGTAAAGCACTTTAAGTTGGGAGGAAGGGCAGTAAGCTAATACCTTGCTGT  
TTTGACGTTACCGACAGAATAAGCACCGGCTAACTTCGTG

>7059 len=160 tot-seq=1

TGGGGAATTTTGGACAATGGGGGAAACCCTGATCCAGCCATCCCPCGTGAGTGAAGAAGG  
CCCTCGGGTTGTAAAGCTCTTTTGTGAGGGAAGAAAAGGTGATCTAATACAGGTCACC  
CATGACGGTACCTGAAGAATAAGCACCGGCTAACTACGTG

>7060 len=160 tot-seq=1

TAGGGAATTTTCGGCAATGGGGGAAACCCTGACGGAGCAACGCCGCGTGAGTGATGAAGG  
TCTTCGGATCGTAAACTCTGTTATCAGGGAAGAACAATGTGTAAGTAACTGTGCACAT  
CTTGACGGTACCTGATCAGAAAGCCACGGCTAACTACGTG

>7061 len=160 tot-seq=1

TGGGGAATATTGGACAATGGGGGCAACCCTGATCCAGCCATGCCGCGTGTGTGAAGAAGG  
TCTTCGGATTGTAAAGCACTTTAAGTTGGGAGGAAGGGCAGTTGCCTAATACGTAAGTGT  
TTTGACGTTACCGACAGAATAAGCACCGGCTAACTTTGTG

>7062 len=160 tot-seq=1

TGGGGAATATTGGACAATGGGGGAAACCCTGATCCAGCCATGCCGCGTGTGTGAAGAAGG  
CCTTCGGGGTTGTAAAGGACTTTTGTGAGGGAAGAAAAGGACAGGGTTAATACCCCTGTCT  
GATGACGGTACCTGAAGAATAAGCACCGGCTAACTACGTG

>7063 len=160 tot-seq=1

TGGGGAATATTGGACAATGGGCGAAAGCCTGATCCAGCCATGCCGCGTGAGTGAAGAAGG  
TCTTCGGATCGTAAAGCTCTGTTGTAAGTGAAGAACGGCTCATAGAGGAAATGCTATGGG  
AGTGACGGTAGCTTACCAGAAAGCCACGGCTAACTACGTG

>7064 len=160 tot-seq=1

TGGGGAATCTTCGCAATGGGGGAAACCCTGATCCAGCCATCCC GCGTGTGCGATGAAGG  
CCTTCGGGTTGTAAAGCACTTTTGGCAGGAAAGAAACGTCATGGGTTAATACCCCGTGAA  
ACTGACGGTACCTGCAGAATAAGCACCGGCTAACTACGTG

>7065 len=160 tot-seq=1

TGGGGAATATTGGGCAATGGACGCAAGTCTGACCCAGCAACGCCGCGTGAAGGAAGAAGG  
CTTTCGGGTTGTAAAGCACTTTTCACTGAGGAAGAACGCCTGGTGGTTAATACCCATCAGG  
AAAGACATCACTCACAGAAGAAGCACCGGCTAACTCCGTG

>7066 len=160 tot-seq=1

TAGGGAATCTTCGCAATGGGGGGAACCCTGACCGAGCAACGCCGCGTGTCTGAAGAAGG  
CCTTCGGGTTGTAAAGGACTTTTGTGAGGGAAGAAAAGGACAGGGTTAATACCCCTGTCT  
GATGACGGTACCTGAAGAATAAGCACCGGCTAACTACGTG

>7067 len=160 tot-seq=1

TGAGGAATATTGGTCAATGGGCGAGAGCCTGAACCAGCCAAGTCGCGTGGGTGAAGAAGG  
CCCTCGGGTTGTAAAGCTCTTTTGTGAGGGAAGAAAAGGTGATCTCTAATACAGGTCACT  
CATGACGGTACCTGAAGAATAAGCACCGGCTAACTACGTG

>7068 len=160 tot-seq=1

CCTGTTCTTGTGCTGGTGGTGAGGTTAATTTTTGGCATTCTACTCTGAGGGAGAAGGAA  
TGAAGAGATATCTGGTTGGGTCCAGACTGAACCGGGTCATCATGTGGTGGGAGGGGAATT  
GAGGATGTGATGGAGGATAGAGGGGCAGGTCAAGAGATCA

>7069 len=160 tot-seq=1

TGGGGAATATTGCACAATGGGGGAAACCCTGATGCAGCGACGCCGCGTGAAGGATGAAGG  
TCTTCGGATTGTAAAGCACTTTAAGTTGGGAGGAAGGGCAGTTACCTAATACGTGATTGT  
TTTGACGTTACCGACAGAATAAGCACCGGCTAACTCTGTG

>7070 len=160 tot-seq=1

TGGGGAATATTGGACAATGGGCGCAAGCCTGGTCCAGCCATGCCGCGTGAGTGATGAAGG

CCCTAGGGTTGTAAAGCTCTTTCAGCGGGGAGGAAGGGAGTAAAGTTAATACCTTTGCTC  
ATTGACGTTACCCGCAGAAGAAGCACCGGCTAACTCCGTG

>7071 len=160 tot-seq=1

GGCACTGTAGTGCCAGCTGAGGGGTCACTATCACACCTGCACCTTTATTTAAAATTAGGA  
TGCTAAGATTCAAATCGGGTTTTACAGTTTTGTAAGCCCTACTGAGTACTACTCAGCTA  
CACCCACCACAACCATAAATTAATCCACATTTTGTCCCT

>7072 len=160 tot-seq=1

TAGGGAATCTTCCGCAATGGGCGAAAGCCTGACGGAGCAACGCCGCGTGAGTGATGAAGG  
TCTTCGGATCGTAAAGCTCTGTTGTAAGTGAAGAACGGCTCACAGAGGAAATGCTATGGG  
AGTGACGGTAGCTTACCAGAAAGCCACGGCTAACTACGTG

>7073 len=160 tot-seq=1

TAGGGAATTTTCGTC AATGGGGGGAATCCTGAACGAGCAATGCTGCGTGTATGAAGAAGG  
CCTTCGGGTTGTAAAGTACTTTTCAGCGGGGAGGAAGGGAGTAAAGTTAATACCTTTACTC  
ATTGACGTTACCCGCAGAAGAAGCACCGGCTAACTCCGTG

>7074 len=160 tot-seq=1

TGGGGAATATTGCACAATGGGGGAAAGCCTGACGGAGCAACGCCGCGTGAGTGATGAAGG  
TCTTCGGATCGTAAACTCTGTTATCAGGGAAGAACAATGTGTAAGTAACTATGCACGT  
CTTGACGGTACCTAATCAGAAAGCCACGGCCA ACTACGTG

>7075 len=160 tot-seq=1

TAGGGAATCTTCCGCAATGGGCGAAAGCCTGATCCAGCCATGCCGCGTGTGTGAAGAGGG  
TCTTCGGATTGTAAAGCACTTTAAGTTGGGAGGAAGGGCAGTTGCCTAATACGTA ACTGT  
TTTGACGTTACCGACAGAATAAGCACCGGCTAACTCTGTG

>7076 len=160 tot-seq=1

TAGGGAATCTTCGGCAATGGACGAAAGTCTGACCGAGCAACGCCGCGTGAGTGAAGAAGG  
TTTTCGGATTGTAAAGCACTTTAAGTTGGGAGGAAGGGCAGTAAATTAATACTTTGCTGT  
TTTGACGTTACCGACAGAATAAGCACCGGCTAACTCTGTG

>7077 len=160 tot-seq=1

TAGGGAATCTTCGGCAATGGACGGAAGTCTGACCGAGCAACGCCGCGTGAGTGAAGAAGG  
TTTTCGGGTTGTAAAGGACTTTTGT CAGGGAAGAAAAGGCTGTTGCTAATATCGACAGCT

GATGACGGTACCTGAAGAATAAGCACCGGCTAACTACGTG

>7078 len=160 tot-seq=1

TGGGGAATATTGGGCAATGGAGGAACTCTGACCCAGCAACGCCGCGTGGAGGAAGAAGG

TTTTCGGGTTGTAAAGTACTTTTCAGCGGGGAGGAAGGGAGTAAAGTTAATACCTTTGCTC

ATTGACGTTACCCGCAGAAGAAGCACCGGCTAACTCCGTG

>7079 len=160 tot-seq=1

TGGGGAATATTGGACAATGGGGGGAACCCTGATCCAGCCATGCCGCGTGTGTGAAGAAGG

CCCTCGGGTTGTAAAGGACTTTTGTTCAGGGAAGAAAAGGCTGTTGCTAATATCAATAGCT

GATGACGGTACCTGAAGAATAAGCACCGGCTAACTACGTG

>7080 len=160 tot-seq=1

TGGGGAATTTTGGACAATGGGCGCAAGCCTGACGGAGCAACGCCGCGTGAGTGATGAAGG

GTTTCGGCTCGTAAACTCTGTTATTAGGGAAGAACAATGTGTAAGTAACTGTGCACAT

CTTGACGGTACCTAATCAGAAAGCCACGGCTAACTACGTG

>7081 len=160 tot-seq=1

TGGGGAATATTGGGCAATGGAGGAACTCTGACCCAGCAACGCCGCGTGGAGGAAGAAGG

TTTTCGGATCGTAAACTGCTTTTGTTCAGGGACGAAAAGGGATGCGATAACACCGCATTCC

GCTGACGGTACCTGAAGAATAAGCACCGGCTAACTACGTG

>7082 len=160 tot-seq=1

TGGGGAATATTGCGCAATGGGGGGAACCCTGACGCAGCCATGCCGCGTGAATGAAGAAGG

CCTACGGGTTGTAAAGGACTTTTGTCCGGGAAGAAAAGCGCGATGTTAATACCATTGCGT

GCTGACGGTACCGGAAGAATAAGCACCGGCTAACTACGTG

>7083 len=160 tot-seq=1

TGGGGAATATTGCGCAATGGGGGGAACCCTGACGCAGCCATGCCGCGTGAATGAAGAAGG

CCTTAGGGTTGTAAAGCTCTTTTCGGCCGGGAAGAAATCGCATAGGCTAATACCCTGTGTG

GATGACGGTACCGGAATAAGAAGCACCGGCTAACTACGTG

>7084 len=160 tot-seq=1

TAGGGAATCTCCACAATGGACGAAAGTCTGATGGAGCAACGCCGCGTGAATGAAGAAGG

CCTTCGGGTTGTAAAATTCTGTTATAAGGGAAGAAAGGTGATAGGAGGAAATGACTATCA

ATTGACGGTACCTTACGAGAAAGCCACGGCTAACTACGTG



>7085 len=160 tot-seq=1

TGAGGAATATTGGTCAATGGACGAGAGTCTGATGCAGCCATGCCGCGTGTATGAAGAAGG  
CCTTCGGGTTGTAAAGTACTTTTCAGCGGGGAGGAGGGGAGTAAAGTTAATACCTTTGCTC  
ATTGACGTTACCCGCAGAAGAAGCACCCGGCTAACTCCGTG

>7086 len=160 tot-seq=1

TGGGGAATTTTCCGCAATGGGCGAAAGCCTAATCCAGCCATGCCGCGTGTGTGAAGAAGG  
TCTTCGGATTGTAAAGCACTTTAAGTTGGGGGGAGGGGCATTAACCTAATACGTTAGTGT  
TTTGACGTTACCGACAGAATAAGCACCCGGCTAACTCTGTG

>7087 len=160 tot-seq=1

TGGGGAATTTTGGACAATGGGCGAAAGCCTGATCCAGCCATGCCGCGTGTCTGAAGAAGG  
CCTTCGGGTTGTAAAGGACTTTTGTTCAGGGAAGAAAAGGGCGGGATTAATACCCCTGTCT  
GATGACGGTACCTGACTAAGAAGCCCCGGCTAACTACGTG

>7088 len=160 tot-seq=1

TGAGGAATATTGGTCAATGGGCGTAAGCCTGAACCAGCCAAGTCGCGTGTGTGAAGAAGG  
TCTTCGGATTGTAAAGCACTTTAAGTTGGGAGGAAGGGCAGTAAGTTAATACCTTGCTGT  
TTTGACGTTACCAACAGAATAAGCACCCGGCTAACTTCGTG

>7089 len=160 tot-seq=1

TAGGGAATCTTCGGCAATGGACGAAAGTCTGACCGAGCAACGCCGCGTGAGTGAAGAAGG  
TTTTCGGATCGTAAACTCTGTTGTTAGGGAAGAACAAGTACCGGAGTAACTGCCGGTAC  
CTTGACGGTACCTAACCAGAAAGCCACGGCTAACTACGTG

>7090 len=160 tot-seq=1

TGGGGAATATTGCACAATGGGCGAAAGCCTGATGCAGCAACGCCGCGTGAGGGAAGACGG  
TTTTCGGATCGTAAACTCTGTTATTAGGGAAGAACAATGTGTAAGTAACTATGCACGT  
CTTGACGGTACCTAATCAGAAAGCCACGGCTAACTACGTG

>7091 len=160 tot-seq=1

TGGGGAATCTTGGACAATGGGCGAAAGCCCGATCCAGCAATATCGCGTGTGAGTGAAGAAGG  
CCTTCGGGTTGTAAAGTACTTTTCAGCGGGGAGGAAGGGAGTAAAGTTAATACCTTTGCTC  
ATTGACGTTACCCGCAGAAGAAGCACCCGGCTAACTCCGTG

>7092 len=160 tot-seq=1

TGAGGAATATTGGTCAATGGACGAGAGTCTGAACCAGCCAAGTAGCGTGAGTGAAGAAGG  
TTTTCGGATCGTAAAACCTCTGTTGTTAGAGAAGAACAAGGACGTTAGTAACTGAACGTCC  
CCTGACGGTATCTAACCAGAAAGCCACGGCTAACTACGTG

>7093 len=160 tot-seq=1

TGGGGAATATTGCACAATGGGGGAAACCCTGATGCAGCGACGCCGCGTGAGCGAAGAAGG  
CCTTCGGGTTGTAAAGTTCTTTTCGGTATTGAGGAAGGTTGATGTGTTAATAGTACATCAA  
ATTGACGTTAAATACAGAAGAAGCACCCGGCTAACTCCGTG

>7094 len=160 tot-seq=1

TAGGGAATCTTCGGCAATGGGCGAAAGCCTGACCGAGCAACGCCGCGTGAATGAAGAAGG  
CCTTCGGGTTGTAAAGCACTTTTGTCTGGGAAAGAAAACCTCTGCCCTAATACGGTGGGGG  
GATGACGGTACCGGAAGAATAAGCACCCGGCTAACTACGTG

>7095 len=160 tot-seq=1

TGGGGAATTTTGGACAATGGGCGCAAGCCTGATCCAGCCATTCCGCGTGCAGGATGAAGG  
CCCTCGGGTTGTAAACTGCTTTTGTACGGAACGAAACGGCTCTGGTTAATACCTGGGGCT  
AATGACGGTACCGTAAGAATAAGCACCCGGCTAACTACGTG

>7096 len=160 tot-seq=1

TGGGGAATCTTCGCAATGGACGAAAGTCTGACGGAGCAACGCCGCGTGAGTGATGACGG  
CCTTCGGGTTGTAAAATTCTGTTATAAGGGAAGAAAGGTGATAGGAGGAAATGACTATCA  
ATTGACGGTACCTTATGAGAAAGCCACGGCTAACTACGTG

>7097 len=160 tot-seq=1

TAGGGAATCTTCGGCAATGGGCGAAAGCCTGACCGAGCAACGCCGCGTGAATGAAGAAGG  
CCTTCGGGTTGTAAAATTCTTTTCGGTATTGAGGAAGGTTGATGTGTTAATAGCACATCAA  
ATTGACGTTAAATACAGAAGAAGCACCCGGCTAACTCCGTG

>7098 len=160 tot-seq=1

TGGGGAATATTGCACAATGGGCGCAAGCCTGATGCAGCCATGCCGCGTGTATGAAGAAGG  
CCTTCGGGTTGTAAAGTACTTTTGTCCGGAAAGAAAACGCCGTTGTTAATACCCGTGGCG  
GATGACGGTACCGGAAGAATAAGCACCCGGCTAACTACGTG

>7099 len=160 tot-seq=1

TAGGGAATTTTCGTCAATGGGGGAAACCCTGAACGAGCAATGCCGCGTGTGTGAAGAAGG

CCTTTTGGTTGTAAAGCACTTTAAGTGGGGAGGAAAAGCTTATGGTTAATACCCATAAGC  
CCTGACGTTACCCACAGAATAAGCACCGGCTAACTCTGTG

>7100 len=160 tot-seq=1

TGGGGAATATTGCACAATGGGGGAAACCCTGATGCAGCGACGCCGCGTGTGTGAAGAAGG  
CCTTCGGGTTGTAAAGCACTTTTGTCCGGAAAGAAAACCTCTGCCCTAATACGGTGGGGG  
GATGACGGTACCGGAAGAATAAGCACCGGCTAACTACGTG

>7101 len=160 tot-seq=1

TGGGGAATATTGGACAATGGGCGCAAGCCTGATCCAGCCATACCGCGTGGGTGAAGAAGG  
CCTTCGGGTTGTAAAGCCCTTTTGTGGAAAGAAATCCAGCCGGCTAATACCTGGTTGG  
GATGACGGTACCTGTTTAGAAAGCTCCGGCTAACTACGTG

>7102 len=160 tot-seq=1

TGAGGAATATTGGTCAATGGGCGATGGCCTGATCCAGCAATGCCGCGTGTGTGAAGAAGG  
CCTTCGGGTTGTAAAGCACTTTTGTCCGGAAAGAAAACCTCCTGGTTAATACCTGGGGGG  
GATGACGGTACCGGAAGAATAAGCACCGGCTAACTACGTG

>7103 len=160 tot-seq=1

TGGGGAATCTTGGACAATGGGCGAAAGCCCGATCCAGCAATATCGCGTGTGTGAAGAAGG  
TCTTCGGATTGTAAAGCACTTTAAGTTGGGAGGAAGGGCATTAACTAATACGCTAGTGT  
TTTGACGTTACCGACAGAATAAGCACCGGCTAACTTCGTG

>7104 len=160 tot-seq=1

TAGGGAATCTTCGGCAATGGGCGAAAGCCTGACCGAGCAACGCCGCGTGAATGAAGAAGG  
CCCTTTGGTTGTAAAGCACTTTAAGTGGGGAGGAAAAGCTTATGGTTAATACCCATAAGC  
CCTGACGTTACCCACAGAATAAGCACCGGCTAACTCTGTG

>7105 len=160 tot-seq=1

TGGGGAATTTTGGGCAATGGGGGCAACCCTGATCCAGCAATGCCGCGTGTGTGAAGAAGG  
TCTTCGGATTGTAAAGCACTTTAAGTTGGGAGGAAGGGCATTAACTAATACGTTAGTGT  
TTTGACGTTACCGACAGAATAAGCACCGGCTAACTTCGTG

>7106 len=160 tot-seq=1

TGGGGAATTTTCCGCAATGGGCGAAAGCCTGACGGAGCAATGCCGCGTGGAGGTGGAAGG  
CCTACGGGTCGTAAAGGACTTTTGTGAGGAAAGAAAAGGCTGTTGCTAATATCGACAGCT

GATGACGGTACCTGAAGAATAAGCACCGGCTAACTACGTG

>7107 len=160 tot-seq=1

TCGAGAATCATTACAATGGGGGCAACCCTGATGGTGCGACGCCGCGTGAAGGAAGAAGT  
AATTCGTTATGTAACTTCTGTCATAGAGGAAGAACGGTGGATATAGGAATGATATCCA  
AGTGACGGTACTCTATAAGAAAGCCACGGCTAACTACGTG

>7108 len=160 tot-seq=1

TGGGGAATTTTGGACAATGGGCGCAAGCCTGATCCAGCCATGCCGCGTGTCTGAAGAAGG  
CCTTCGGGTTGTAAAGGACTTTTGTGAGGGAAGAAAAGGACAGGGTTAATACCCCTGTCT  
GATGACGGTACCTGAGGAATAAGCATCGGCTAACTCTGTG

>7109 len=160 tot-seq=1

TAGGGAATCTCCGCAATGGGCGAAAGCCTGACGGAGCAACGCCGCGTGAGTGATGAAGG  
TCTTCGGATCGTAAACTCTGTTATTAGAGAAGAAAGTGCGTGAGAGTAACTGTTACAGT  
TTCGACGGTATCTAACCAGAAAGCCACGGCTAACTACGTG

>7110 len=160 tot-seq=1

TGGGGAATATTGGACAATGGGCGAAAGCCTGATCCAGCCATGCCGCGTGTGTGAAGAAGG  
TCCTCGGGTTGTAAAGCTCTTTTGTGAGGGAAGAAAAGGTGATCTCTAATACAGGTCCT  
CATGACGGTACCTGAAGAATAAGCACCGGCTAACTACGTG

>7111 len=160 tot-seq=1

TAGGGAATCTCCACAATGGGCGAAAGCCTGATGGAGCAACGCCGCGTGGGTGAAGAAGG  
TCTTAGGGTTGTAAAGTTCTTTGCGTATTGAGGAAGGTTGATGTGTTAATAGTACATCAA  
ATTGACGTTAAATACAGAAGAAGCACCGGCTAACTCCGTG

>7112 len=160 tot-seq=1

TGGGGAATTTTGGACAATGGGCGCAAGCCTGATCCAGCCATGCCGCGTGTCTGAAGAAGG  
CCTTCGGGTTGTAAAGGACTTTTGTGAGGGAAGAAAAGGGCGGGGTTAATACCATTGCGT  
GCTGACGGTACCGGAAGAATAAGCACCGGCTAACTACGTG

>7113 len=160 tot-seq=1

TGGGGAATTTTGGACAATGGGCGCAAGCCTGATCCAGCAATGCCGCGTGAGTGAAGAAGG  
CCCTCGGGTTGTAAAGTACTTTTGTGAGGGGAGGAAGGCGTTGTGGTTAATAACCACAGCG  
ATTGACGTTACCCGCAGAAGAAGCACCGGCTAACTCCGTG

>7114 len=160 tot-seq=1

TGGGGAATATTGCACAATGGGCGCAAGCCTGATGCAGCCATGCCGCGTGTATGAAGAAGG  
CCTTCGGGTTGTAAACTGCTTTTGTACGGAACGAAAAAGCTTCTCCTAATACGAGAGGCC  
CATGACGGTACCGTAAGAATAAGCACCGGCTAACTACGTG

>7115 len=160 tot-seq=1

TGGGGAATATTGCACAATGGGCGCAAGCCTGATGCAGCCATGCCGCGTGTATGAAGAAGG  
CCTTCGGGTTGTAAAGTACTTTTACGCGGGGAGGAAGGCGATAAGGTTACTACTTTGCTGT  
TTTGACGTTACCGACAGAATAAGCACCGGCTAACTCTGTG

>7116 len=160 tot-seq=1

TAGGGAATCTTCGGCAATGGGGGCAACCCTGATGCAGCCATGCCGCGTGTATGAAGAAGG  
CCTTCGGGTTGTAAAGTACTTTTACGCGGGGAGGAAGGCGATAAGGTTAATAACCTTGTCG  
ATTGACGTTACCCGCAGAAGAAGCACCGGCTAACTCCGTG

>7117 len=160 tot-seq=1

TAGGGAATCTTCGGCAATGGACGAAAGTCTGACGGAGCAACGCCGCGTGAGTGAAGAAGG  
TTTTCGGATCGTAAACTCTGTTGTCAGGGAAGAACAAGTACGGGAGTAACTGCCCGTAC  
CTTGACGGTACCTGGCCAGAAAGCCACGGCTAACTACGTG

>7118 len=160 tot-seq=1

GGCGGGGAGAATGCCCTCCACTGCCCCCTCCCCAACCTTGACTCGATTGCTCTTCTCCTC  
TGGGGACAGCGATGTGGTTAGGAAAGGCAGCATTCCAAGGGCGCTTCTGTGGCTGCATC  
TGCCTCTTCCCTTGCTCCCCCTGCCCTTTCTGGTAAGTG

>7119 len=160 tot-seq=1

TAGGGAATCTTCACAATGGACGCAAGTCTGATGCAGCCATGCCGCGTGAGTGAAGAAGG  
TTTTCGGATCGTAAAGCTCTGTTGTAAGAGAAGAACGAGTGTGAGAGTGGAAGTTCACA  
CTGTGACGGTATCTTACCAGAAAGGGACGGCTAACTACGT

>7120 len=160 tot-seq=1

TAGGGAATCTTCGGCAATGGACGGAAGTCTGACCGAGCAACGCCGCGTGAGTGAAGAAGG  
CCTTCGGGTTGTAAAGCACTTTTACGCGGGGAGGAAGGCGGTGAGGTTAATAACCTCATCG  
ATTGACGTTACCCGCAGAAGAAGCACCGGCTAACTCCGTG

>7121 len=160 tot-seq=1

TGGGGAATATTGCACAATGGGCGCAAGCCTGATGCAGCCATGCCGCGTGTATGAAGAAGG  
CCTTCGGATCGTAAAACCTCTGTTGTTAGAGAAGAACACGAGTGAGAGTAACTGTTTCATTC  
GATGACGGTATCTAACCCAGCAAGTCACGGCTAACTACGTG

>7122 len=160 tot-seq=1

TAGGGAATCTTCCACAATGGACGCAAGTCTGATGGAGCAACGCCGCGTGAGTGAAGAAGG  
TCTTCGGATCGTAAAACCTCTGTTGTTAGAGAAGAACACGAGTGAGAGTAACTGTTTCATTC  
GATGACGTTACCCGCAGAAGAAGCACCCGGCTAACTCCGTG

>7123 len=160 tot-seq=1

TAGGGAATCTTCCACAATGGACGCAAGTCTGATGGAGCAACGCCGCGTGAGTGAAGAAGG  
TCTTCGGATCGTAAAACCTCTGTTGTTAGAGAAGAAAGTGCCTGAGAGTAACTGTTTCATTC  
TATGACGGTATCTAACCCAGCAAGTCACGGCTAACTACGTG

>7124 len=160 tot-seq=1

TGGGGAATATTGCACAATGGGCGCAAGCCTGATGCAGCCATGCCGCGTGTATGAAGAAGG  
TTTTCGGATCGTAAAACCTCTGTTGTTAGAGAAGAACAAGGACGTTAGTAACTGAACGTCC  
CCTGACGGTATCTAACCCAGAAAAGCCACGGCTAACTACGTG

>7125 len=160 tot-seq=1

TAGGGAATCTTCGGCAATGGGGGGAACCCTGACCGAGCAACGCCGCGTGAGTGAAGAAGG  
TTTTCGGATCGTAAAGCTCTGTTGTTAAAGAAGAACACGTATGAGAGTAACTGTTTCATAC  
GTTGACGGTATTTAACCCAGAAAAGTCACGGCTAACTACGTG

>7126 len=160 tot-seq=1

TGGGGAATTTTGGACAATGGGGGCAACCCTGATCCAGCCATGCCGCGTGCGGGAAGAAGG  
TTTTCGGATCGTAAAGCTCTGTTGTTGGTGAAGAAGGATAGAGGTAGTAACTGGCCTTTA  
TTTGACGGTAATCAACCAGAAAAGTCACGGCTAACTACGTG

>7127 len=160 tot-seq=1

TGGGGAATCTTGCACAATGGGCGAAAAGCCTGATGCAGCGACGCCGCGTGTATGAAGAAGG  
CCTTCGGGTTGTAAAGTACTTTTCAGCGGGGAGGAAGGGAGTAAAGTTAATACCTTTGCAC  
ATTGACGTTACCCGCAGAAGAAGCACCCGGCTAACTCCGTG

>7128 len=160 tot-seq=1

TGGGGAATATTGCACAATGGGGGAAACCCTGATGCAGCGACGCCGCGTGAGCGATGAAGG

CTTTCGAGTCGTAAAGCTCTGTTGTTGGTGAAGAAGGATAGAGGTAGTAACTGGCCTTTA  
TTTGACGGTAATCAACCAGAAAGTCACGGCTAACTACGTG

>7129 len=160 tot-seq=1

TGGGGAATTTTGGACAATGGGCGAAAGCCTGATCCAGCAATGCCGCGTGATAGGATGAAGG  
CCCTCGGGTTGTAACTACTTTTGTACGGAACGAAAAGACTCTTCTAATAAAGAGAGTC  
CATGACGGTACCGTAAGAATAAGCACCGGCTAACTACGTG

>7130 len=160 tot-seq=1

TGGGGAATATTGGACAATGGAGGCAACTCTGATCCAGCAATTCTGTGTGTGTGAAGAAGG  
TTTTCGGATCGTAAAGCTCTGTTGTTGGTGAAGAAGGATAGAGGTAGTAACTGGCCTTTA  
TTTGACGGTAATCAACCAGAAAGTCACGGCTAACTACGTG

>7131 len=160 tot-seq=1

TGGGGAACATTGCACAATGGGCGGAAGCCTGATGCAGCGACGCCGCGTGGGGGATGACGG  
CCTTCGGGTTGTAAAGCTCTGTTGTTGGTGAAGAAGGACAGGGGTAGTAACTGACCTTTG  
TTTGACGGTAATCAATTAGAAAAGTCACGGCTAACTACGTG

>7132 len=160 tot-seq=1

TAGGGAATCTTCCACAATGGACGAAAGTCTGATGGAGCAACGCCGCGTGAGTGAAGAAGG  
TTTTCGGATCGTAAAGCTCTGTTGTTGGTGAAGAACGTGCGTGAGAGTAACTGGCCTTTA  
TTTGACGGTAATCAACCAGAAAGTCACGGCTAACTACGTG

>7133 len=160 tot-seq=1

TAGGGAATCTTCCGCAATGGACGCAAGTCTGACGGAGCAACGCCGCGTGAGTGAAGAAGG  
ATTTTCGGTTCGTAAACTCTGTTGTTAGAGAAGAAGGACAGGGGTAGTAACTGACCTTTG  
TTTGACGGTAATCAATTAGAAAAGTCACGGCTAACTACGTG

>7134 len=160 tot-seq=1

TAGGGAATCTTCCACAATGGACGCAAGTCTGATGGAGCAACGCCGCGTGAGTGAAGAAGG  
GTTTCGGGTTGTAAAGCACTTTCAGTGAGGAAGAACGCCTGGTGGTTAATACCCATCAGG  
AAAGACATCACTCACAGAAGAAGCACCGGCTAACTCCGTG

>7135 len=160 tot-seq=1

TAGGGAATCTTCCGCAATGGGCGAAAGTCTGACGGAGCAACGCCGCGTGAGTGAAGAAGG  
ATTTTCGGTTCGTAAAGCTCTGTTGTTAGGGAAGAATGATTATGTAGTAACTATACATAGT

AGAGACGGTAACTAACCAGAAAGGGACGGCTAACTACGTG

>7136 len=160 tot-seq=1

TAGGGAATCTTCGGCAATGGACGGAAGTCTGACCGAGCAACGCCGCGTGAGTGAAGAAGG

TTTTCGGATCGTAAAGCTCTGTTGTTAGAGAAGAATGACTGTGTAGTAACTATACACAGT

AGAGACGGTACCTAACCAGAAAGCCACGGCTAACTACGTG

>7137 len=160 tot-seq=1

TGGGGAATCTTCGGCAATGGACGAAAGTCTGACGGAGCAACGCCGCGTGAGTGATGACGG

TCTTCGGATTGTAAACTCTGTTGTTAGAGAAGAACAGCGCATAGAGTAACTGTTATGCG

TGTGACGGTATCTAACCAGAAAGCCACGGCTAACTACGTG

>7138 len=160 tot-seq=1

TAGGGAATCTTCCACAATGGACGAAAGTCTGATGGAGCAACGCCGCGTGTGTGATGAAGG

GTTTCGGCTCGTAAACACTGTTATAAGAGAAGAACGTCAGTGAGGGTAACTATTCATTG

AGTGACGGTATCTTATCAGAAAGGGACGGCTAAATACGTG

>7139 len=160 tot-seq=1

TAGGGAATCTTCCACAATGGACGCAAGTCTGATGGAGCAACGCCGCGTGAGTGAAGAAGG

GTTTCGGATCGTAAAGCTCTGTTGTAAGTGAAGAACGGCTCATAGAGGAAATGCTATGGG

AGTGACGGTAGCTTACCAGAAAGCCATGGCTAACTACGTG

>7140 len=160 tot-seq=1

TGGGGAATCTTGCGCAATGCGCGAAAGCGTGGCGCAGCAACGCCGCGTGCGGGAAGACGG

CCTTCGGGTTGTAAACCGCTTTCAGTTGGGACGAAGCTTCGCCGGTTAATAGCCGGCTGG

AGTGACGGTACCTTCACAAGAAGCCCCGGCTAACTACGTG

>7141 len=160 tot-seq=1

TGGGGAATCTTGCACAATGCGCGAAAGCGTGATGCAGCAACGCCGCGTGCGGGAAGAAGG

CCTTAGGGTTGTAAACCGCTTTCAGTTGGGACGAAGCTTCAGTCGTTAATAGCGGTTTGG

AGTGACGGTACCTTCAGAAGAAGCGCCGGCTAACTACGTG

>7142 len=160 tot-seq=1

TGGGGAATTTTGCACAATGGGGGAAACCCTGATGCAGCGACGCCGCGTGATTTAGAAGGC

CTTATAGATTGTAAAGTTCTTTTATATGGGAAGAAACGCTAAAATAGGAAATGATTTTAG

TTTGACTGTACCATTTGAATAAGTATCGGCTAACTATGTG



>7143 len=160 tot-seq=1

CAAGGAATTTTCCGCAATGGGCGCAAGCCTGACGGAGCAACGCCGCGTGAGTGAAGAAGG  
TTTTCGGATCGTAAAGCTCTGTTGTTAAGGAAGAACGAGTGTGAGAATGGAAAGTTCATG  
CTGTGACGGTACTTAACCAGAAAGGGACGGCTAACTACGT

>7144 len=160 tot-seq=1

TGGGGAATTTTGGACAATGGGCGCAAGCCTGATCCAGCAATGCCGCGTGCGGGAAGAAGG  
CCTTCGGGTTGTAAACCGCTTTTGGCAGGAACGAAACGGTGTCCGCTAATACCGGGCGCT  
AATGACGGTACTTAACCAGAAAGGGACGGCTAACTACGTG

>7145 len=160 tot-seq=1

TGGGGAATTTTGCACAATGGGGGAAACCCTGATGCAGCGACGCCGCGTGATTTAGAAGGC  
CTTCGGGTTGTAAAGCTCTGTTAATCGGGACGAAAGGCCTTCTTGCGAATAGTGAGAAGG  
ATTGACGGTACCGGAATAGAAAGCCACGGCTAACTACGTG

>7146 len=160 tot-seq=1

TGGGGAATCTTGCACAATGGGCGAAAAGTCTGACGGAGCAACGCCGCGTGAGTGAAGAAGG  
TTTTCGGATCGTAAACTCTGTTGTAAGAGAAGAACAAATTGTAGAGTAACTGCTACAGT  
CTTGACGGTATCTTACCAGAAAGCCACGGCTAACTACGTG

>7147 len=160 tot-seq=1

TGGGGAATATTGGACAATGGAGGAAACTCTGATCCAGCAATTCTGTGTGAGTGAAGAAGG  
ATTCGGTTTCGTAAACTCTGTTGTTAGAGAAGAACAGCGCATAGAGTAACTGTTATGCG  
TGTGACGGTATCTAACCAGAAAGCCACGGCTAACTACGTG

>7148 len=160 tot-seq=1

TAGGGAATCTTCCGCAATGGACGAAAAGTCTGACGGAGCAACGCCGCGTGAGTGAAGAAGG  
ATTCGGTTTCGTAAACTCTGTTGTTAGGGAAGAAAAAATGTATAGTAACTATATACAAA  
AGAGACGGTACCTACAGAAGAAGCCCCGGCTAACTACGTG

>7149 len=160 tot-seq=1

TGGGGAATATTGGACAATGGAGGAAACTCTGATCCAGCGACACAGCGTGACGATGAAGG  
TCTTCGGATTGTAAAGTGCTGTTATAAGGGAAGAACATTTGCAATAGGAAATGATTGCAG  
ACTGACGGTACCTTGTGAGAAAGCGATGGCTAACTATGTG

>7150 len=160 tot-seq=1

TGAGGAATATTGGTCAATGGGCGCAAGCCTGACGGAGCGATGCCGCGTGAGTGAAGAAGG  
CCTTCGGGTTGTAAACTCTGTCTCATCCAAGAGAGACCTGTAGTAACTGCCAGGTC  
TAGGACGGTAGATGAGGAGGAAGCCCCGGCTAACTATGTG

>7151 len=160 tot-seq=1

TGGGGAATATTGGACAATGGGCGCAAGCCTGATCCAGCCATGCCGCGTGTGTGAAGAAGG  
CCTTCGGGTTGTAAAGCACTTTCAGCGAGGAGGAAGGGGTTGTAGTTAATAGCTGCAATT  
TTTGACGTTACTCGCAGAAGAAGCACCGGCTAACTCCGTG

>7152 len=160 tot-seq=1

TGAGGAATATTGGACAATGGGTTAGCGCCTGATCCAGCCATCCC GCGTGTATGAAGAAGG  
CCTTCGGGTTGTAAAGTACTTTCAGCGGGGAGGAAGGGAGTAAAGTTAATACCTTTGCTC  
ATTGACGTTACCCG CAGAAGAAGCACCGGCTAACTCCGTG

>7153 len=160 tot-seq=1

TGGGGAATTTTGGACAATGGGCGAAAGCCTGATCCAGCAATGCCGCGTGTGTGATGAAGG  
CCTTCGGGTTGTAAAGCACTTTTGGTGGGAACGAAACGGTCCGGGTTAATACCCTGGACT  
AATGACGGTACCCG CAGAATAAGCACCGGCTAACTACGTG

>7154 len=160 tot-seq=1

TGGGGAATATTGCACAATGGGCGCAAGCCTGATGCAGCCATGCCGCGTGTATGAAGAAGG  
CCTTCGGGTTGTAAAGCACTTTTGTCCGAAAGAAATCCTTGGCTCTAATACAGTCGGGG  
GATGACGGTACCGGAAGAATAAGCACCGGCTAACTACGTG

>7155 len=160 tot-seq=1

TAGGGAATCTCCACAATGGGCGCAAGCCTGATGGAGCAACACCGCGTGAGTGAAGAAGG  
GTTTCAGCTCGTAAAGCTCTGTTGTTGGAGAAGAAGGACAAGGGTAGTAACTGACCTTTG  
TTTGACGGTAATCAATTAGAAAGTCACGGCTAACTACGTG

>7156 len=160 tot-seq=1

TAGGGAATCTCCACAATGGGTGCAAACCTGATGGAGCAATGCCGCGTGAGTGAAGAAGG  
TCTTCGGATCGTAAAGCTCTGTTGTTAGTGAAGAAGGACAGGGGTAGTAACTGACCTTTG  
TTTGACGGTAATCAATTGGAAAGTCACGGCTAACTACGTG

>7157 len=160 tot-seq=1

TGGGGAATATTGGACAATGGGGGGAACCCTGATCCAGCAATGCCGCGTGTGTGAAGAAGG

CCTGCGGGTTGTAAAGCACTTTCAGTAGGGAGGAGGGCTGATAGGTTAAGAGCTAATTAG  
TTGGACGTTACCTACAGAAGAAGCACCGGCTAACTCCGTG

>7158 len=160 tot-seq=1

TGGGGAATATTGCGCAATGGGGGAAGCCTTATGAAGCAATGCCGCGTGAACGATGAAGGT  
CTTATAGATTGTAAAGTTCTTTTATATGGGAAGAAACGCTAAGATAGGAAATGATTTTAG  
TTTACTGTACCATTTGAATAAGTATCGGCTAACTATGTG

>7159 len=160 tot-seq=1

TAGGGAATATTGCACAATGGAGGAAACTCTGATGCAGCCATGCCGCGTGTGTGAAGAAGG  
CCTTCGGGTTGTAAAGCTCTGTTGGTAGTGAAGAAAGATAGAGGTAGTAACTGGCCTTTA  
TTTGACGGTAATTACTTAGAAAAGTCACGGCTAACTACGTG

>7160 len=160 tot-seq=1

TAGGGAATATTGCACAATGGAGGAAACTCTGATGCAGCCATGCCGCGTGTGTGAAGAAGG  
TCTTCGGATCGTAAAGCTCTGTTGTAAGTGAAGAACGGCTCATAGAGGAAATGCTATGGG  
AGTGACGGTAGCTTACCAGAAAGCCACGGCTAACTACGTG

>7161 len=160 tot-seq=1

TAGGGAATCTTCGGCAATGGACGGAAGTCTGACCGAGCAATGCCGCGTGAGTGAGGAAGG  
TCTTCGGATCGTAAAGCTCTGTTGTAAGAGAAAAACGGCACTCATAGGGAATGATGAGTG  
AGTGATGGTATCTTACCAGAAAGTCACGGCTAACTACGTG

>7162 len=160 tot-seq=1

TGGGGAATATTGCACAATGGACGCAAGTCTGATGGAGCAACGCCGCGTGAGTGAAGAAGG  
CCTTTGGGTTGTAAAGTACTTTCAGCGGGGAGGAAGGGAGTAAAGTTAATACCTTTGCTC  
ATTGACGTTACCCGCAGAAGAAGCACCGGCTAACTCCGTG

>7163 len=160 tot-seq=1

TGGGGTATATTGCACAATGGAGGGAAGTCTGATGCAGCGACGCCGCGTGAACGAAGAAGG  
CTTTCGGATCGTAAACTCTGTTGTTAGAGAAGAACAAGGACGTTAGTAACTGAACGTCC  
CCTGACGGTATCTAACCAGAAAGCCACGGCTAACTACGTG

>7164 len=160 tot-seq=1

TAGGGAATCTTCCACAATGGGCGCAAGCCTGATGGAGCAACACCGCGTGAGTGAAGAAGG  
ATTCGGTTCGTAAACTCTGTTGTTAGAGAAGAACAAGCGCATAGAGTAACTGTTATGCG

TGTGACGGTATCTAACCAGAAAGCCACGGCTAACTACGTG

>7165 len=160 tot-seq=1

TAGGGAATCTTCCACAATGGGCGCAAGCCTGATGGAGCAACACCGCGTGAGTGAAGAAGG  
GTTTCGGCTCGTAAACTCTGTTGTTGGAGAAGAACGTGCGTAAGAGTAACTGAACGTCC  
CTGACGGTATCTAACCAGAAAGCCACGGCTAACTACGTG

>7166 len=160 tot-seq=1

TAGGGAATATTGCACAATGGAGGAAACTCTGATGCAGCCATGCCGCGTGTGTGAAGAAGG  
CCTTCGGGTTGTAAACCGCTTTTGTGAGAGACGAAAAGGGACGTACGAATAATACGTTCC  
GCTGACGGTATCTGAAGAATAAGCACCGGCTAACTACGTG

>7167 len=160 tot-seq=1

TAGGGAATCTTCCACAATGGACGCAAGTCTGATGGAGCAACGCCGCGTGAGTGAAGAAGG  
TTTTCGGATCGTAAACCTGTTGTTAGAGAAGAAGGATAGAGGCAGTAACTGGCCTTTA  
TTTGACGGTAATCAACCAGAAAGTCACGGCTAACTACGTG

>7168 len=160 tot-seq=1

TAGGGAATCTTCCACAATGGGCGCAAGCCTGATGCAGCAACGCCGCGTGAACGATGAAGG  
TCTTCGGATCGTAAAGTTCTGTTGTTAGAGAAGAAAGTGCGTGAGAGTAACTGTTACGT  
TTCGACGGTATCTAACCAGAAAGCCACGGCTAACTACGTG

>7169 len=160 tot-seq=1

TGGGGAATATTGCACAATGGGGGAAACCCTGATGCAGCGACGCCGCGTGAACGAAGAAGG  
TATTCGTATCGTAAAGTTCTGTTGTTGGTGAAGAAGGATAGAGGTAGTAACTGGCCTTTA  
TTTGACGGTAATCAACCAGAAAGTCACGGCTAACTACGTG

>7170 len=160 tot-seq=1

TGGGGAATCTTCCGCAATGGACGAAAGTCTGACGGAGCAACACCGCGTGAGTGAAGAAGG  
GTTTCGGCTCGTAAAGCTCTGTTGTTGGAGAAGAACGTATCTGAGAGTAACTGTTACAGT  
AGTGACGGTATCCAACCAGAAAGTCACGGCTAACTACGTG

>7171 len=160 tot-seq=1

TGGGGAATATTGCGCAATGGGGGAAACCCTGACGCAGCGACGCCGCGTGGGTGAAGAAGG  
TCTTCGGATCGTAAACCTGTTGTTGAGAGAAGAAAGTGCGTGAGAGTAACTGTTACAGT  
TTCGACGGTATCTAACCAGAAAGCCACGGCTAACTACGTG

>7172 len=160 tot-seq=1

TGGGGAATATTGCACAATGGGGGAAACCCTGATGCAGCGACGCCGCGTGAGCGAAGAAGT  
ATTCGGCTCGTAAAACCCTGTTGTTAGAGAAGAAAGTGCGTGAGAGTAACTGTTACGCT  
TTCGACGGTATCTAACCAGAAAGCCACGGCTAACTACGTG

>7173 len=160 tot-seq=1

TAGAGAATCTTCCACAATGGGCGCAAGCCTGATGGAGCAACGCCGCGTGGGTGAAGAAGG  
TTTTCGGATCGTAAAACCCTGTTGTTGGAGAAGAACGTGCGTGAGAGTAACTGTTACGCG  
AGTGACGGTATCCAACCAGAAAGTCACGGCTAACTACGTG

>7174 len=160 tot-seq=1

TAGGGAATCTTCCACAATGGACGCAAGTCTGATGGAGCAACGCCGCGTGAGTGAAGAAGG  
TTTTCGGATCGTAAAGCTCTGTTGTAAGAGAAAAACGACATTCATAGGGAATGATGAGTG  
AGTGATGGTATCTTACCAGAAAGTCACGGCTAACTACGTG

>7175 len=160 tot-seq=1

TAGGGAATATTGCACAATGGAGGAAACTCTGATGCAGCCATGCCGCGTGTGTGAAGAAGG  
CCTTCGGATCGTAAAGCTCTGTTGTAAGAGAAAAACGGCACTCATAGGGAATGATGAGTG  
AGTGATGGTATCTTACCAGAAAGTCACGGCTAACTACGTG

>7176 len=160 tot-seq=1

TAGGGAATCTTCCACAATGGAGGGAACCTCTGATGCAGCGACGCCGCGTGAATGAAGAAGG  
CTTCGAGTCGTAAAGCTCTGTTGGTAGTGAAGAAAGATAGAGGTAGTAACTGGCCTTTA  
TTTGACGGTAATTACTTAGAAAAGTCACGGCTAACTACGTG

>7177 len=160 tot-seq=1

TAGGGAATCTTCCACAATGGACGCAAGTCTGATGGAACAACGCCGCGTGAGTGAAGAAGG  
GTTTCGGCTCGTAAAGCTCTGTTGTTGGTGAAGAAGGACAGGGGTAGTAACTGACCTTTG  
TTTGACGGTATCTAACCAGAAAGCCACGGCTAACTACGTG

>7178 len=160 tot-seq=1

TGGGGAATATTGCACAATGGGCGCAAGCCTGATGCAGCAACGCCGCGTGAACGATGAAGG  
TCTTCGGATCGTAAAACCTCTGTTGTTAGAGAAGAACAAGGACGTTAGTAACTGAACGTCC  
CCTGACGGTATCTAACCAGAAAGCCACGGCTAACTACGTG

>7179 len=160 tot-seq=1

TGGGGAATATTGCACAATGGGCGCAAGCCTGATGCAGCAACGCCGCGTGAACGATGAAGG  
GTTTCGGCTCGTAAAACCTCTGTTGTTGGAGAAGAACGTGCGTAAGAGTAACTGTTTACGC  
AGTGACGGTATCCAACCAGAAAGTCACGGCTAACTACGTG

>7180 len=160 tot-seq=1

TAGGGAATATTGCACAATGGAGGAACTCTGATGCAGCCATGCCGCGTGTGTGAAGAAGG  
CCTTCGGGTTGTAAAACCTGTTGTTAGAGAAGAAAGTGCCTGAGAGTAACTGTTTACGT  
TTCGACGGTATCTAACCAGAAAGCCACGGCTAACTACGTG

>7181 len=160 tot-seq=1

TGGGGAATATTGCACAATGGGCGCAAGCCTGATGCAGCGACGCCGCGTGAGCGAAGAAGT  
ATTCGGTATGTAAAGCTCTGTTGTTGGTGAAGAAGGATAGAGGCAGTAACTGGCCTTTA  
TTTGACGGTAATCAACCAGAAAGTCACGGCTAACTACGTG

>7182 len=160 tot-seq=1

TAGGGAATCTTCGGCAATGGGGGGAACCCTGACCGAGCAACGCCGCGTGAGTGAAGAAGG  
TTTTCGGATCGTAAAGCTCTGTTGTTGGAGAAGAACGTGCGTGAGAGTAACTGTTTACGC  
AGTGACGGTATCCAACCAGAAAGTCACGGCTAACTACGTG

>7183 len=160 tot-seq=1

TGGGGAATATTGCACAATGGGCGAAAGCCTGATGGAGCAACGCCGCGTGGGTGAAGAAGG  
TCTTCGGATCGTAAAGCTCTGTTGTTGGTGAAGAAGGATAAAGGTAGTAACTGGCCTTTA  
TTTGACGGTAATCAACCAGAAAGTCACGGCTAACTACGTG

>7184 len=160 tot-seq=1

TGGGGAATATTGCACAATGGGGGAAAGCCTGATGGAGCAACGCCGCGTGGGTGAAGAAGG  
TCTTCGGATCGTAAAACCTGTTGTTAGAGAAGAAGGATAGAGGCAGTAACTGGCCTTTA  
TTTGACGGTAATCAACCAGAAAGTCACGGCTAACTACGTG

>7185 len=160 tot-seq=1

TGGGGAATCTTCGCAATGGACGAAAGTCTGACGGAGCAACGCCGCGTGAGTGAAGAAGG  
GTTTCGGCTCGTAAAACCTCTGTTGTTGGAGAAGAACGTGCGTAAGAGTAACTGTTTACGC  
AGTGACGGTATCCAACCAGAAAGTCACGGCTAACTACGTG

>7186 len=160 tot-seq=1

TAGGGAATTTTTACAATGGGCGCAAGCCTTATGAAGCAATGCCGCGTGGGTGAAGAAGG

TCTTCGGATCGTAAAACCTGTTGTTAGAGAAGAAAGTGC GTGAGAGTAACTGTTACGCT  
TTCGACGGTATCTAACCAGAAAGCCACGGCTAACTACGTG

>7187 len=160 tot-seq=1

TGGGGAATATTGCACAATGGGGGAAACCCTGATGCAGCGACGCCGCGTGAGCGAAGAAGT  
ATTCGGTATGTAAAGCTCTGTTGTTGGAGAAGAACGTGC GTGAGAGTAACTGTTACGCG  
AGTGACGGTATCCAACCAGAAAGTAACGGCTAACTACGTG

>7188 len=160 tot-seq=1

TAGGGAATCTTCGGCAATGGACGGAAGTCTGACCGAGCAACGCCGCGTGAGTGAAGAAGG  
TTTTCGGATCGTAAAGCTCTGTTGTAAGTGAAGAACGGCTCATAGAGGAAATGCTATGGG  
AGTGACGGTAGCTTACCAGAAAGCCACGGCTAACTACGTG

>7189 len=160 tot-seq=1

TAGGGAATCTTCCACAATGGGCGAAAGCCTGATGGAGCAACGCCGCGTGGGTGAAGAAGG  
GTTTCGGCTCGTAAAGCTCTGTTGTTGGTGAAGAAGGACAGGGGTAGTAACTGACCTTTG  
TTTGACGGTAATCAATTAGAAAGGGACGGCTAACTACGTG

>7190 len=160 tot-seq=1

TGGGGAATATTGCACAATGGACGCAAGTCTGATGGAGCAACGCCGCGTGAGTGAAGAAGG  
TTTTCGGATCGTAAAGCTCTGTTGTTGGTGAAGAAGGATAGAGGCAGTACCTGGCCTTTA  
TTTGACGGTAATCAACCAGAAAGGGACGGCTAACTACGTG

>7191 len=160 tot-seq=1

TGGGGAATTTTGGACAATGGGGGAAACCCTGATCCAGCCATGCCGCGTGCGGGATGAAGG  
CCTTCGGGTTGTAAAGTACTTTACGCGGGGAGGAAGGGAGTAAAGTTAATACCTTTGCTC  
ATTGACGTTACCCGCAGAAGAAGCACCGGCTAACTCCATG

>7192 len=160 tot-seq=1

TAGGGAATCTTCCACAATGGGCGAAAGCCTGATGGAGCAACGCCGCGTGGGTGAAGAAGG  
GTTTCGGCTCGTAAACTCTGTTGTTGAAGAAGAACGTGCGTAAGAGTAACTGTTACGCG  
AGTGACGGTATTCAACCAGAAAGTCACGGCTAACTACATG

>7193 len=160 tot-seq=1

TGGGGAATATTGCACAATGTGCGCAAGCCTGATGGAGCAACACCGCGTGAGTGAAGAAGG  
GTTTCGGCTCGTAAACTCTGTTGTCGGAGAAGAACGTGCGTAAGAGTAACTGTTTACGC

AGTGACGGTATCCAACCAGAAAGTCACGGCTAACTACATG

>7194 len=160 tot-seq=1

TGGGGAATATTGCACAATGGAGGGAACTCTGATGCAGCGACGCCGCGTGAACGAAGAAGG

CTTTCGGCTCGTAAAACTCTGTTGTTGGAGAAGAACGTGCGTAAGAGTAACTGTTTACGC

AGTGACGGTATCCAACCAGAAAGCCACGGCTAACTACGTG

>7195 len=160 tot-seq=1

TGGGGAATATTGGACAATGGGCGCAAGCCTGATCCAGCCATGCCGCGTGAGTGATGAAGG

CCTTAGGGTTGTAAAGTTCTTTTATATGGGAAGAAACGCTAAGATAGGAAATGATTTTAG

TTTACTGTACCATTTGAATAAGTATCGGCTAACTATGTG

>7196 len=160 tot-seq=1

TAGGGAATCTTCCGCAATGGACGCAAGTCTGACGGAGCAACGCCGCGTGAGTGAAGAAGG

GTTTCGGCTCGTAAAACTCTGTTGTTAAGGAAGAATGACACATGGAGTAACTGCCATGTG

TGTGACGGTACTTAACCAGAAAGCCACGGCTAACTACGTG

>7197 len=160 tot-seq=1

TAGGGAATCTTCGGCAATGGGCGCAAGCCTGACGGAGCAATGCCGCGTGAGTGAAGAAGG

CCTTCGGGTTGTAAAACTCTGTCCTCATCCAAGAGAAGGAAAGGTAGTAACTGGCCTTTC

CAGGACGGTGGATGAGGAGGAAGCCCCGGCTAACTATGTG

>7198 len=160 tot-seq=1

TGGGGAATTTTGGACAATGGGCGCAAGCCTGATCCAGTAATGCCGCGTGCAGGATGAAGG

CCTTCGGGTTGTAAACTGCTTTTGTACGGAACGAAAAGCTCTGGGCTAATACCTCGGAGT

CATGACGGTACCGTAAGAATAAGCACCGGCTAACTACGTG

>7199 len=160 tot-seq=1

TAGGGAATCTTCCGCAATGGACGCAAGTCTGACGGATCAACGCCGCGTGTGTGAAGAAGG

TCTTCGGATCGTAAAGCACTGTTGTTAGAGAAGAACGACCGGTAGAGTAACTGTTACCGG

AGCGACGGTATCTAACCCAGAAAGCCACGGCTAACTACGTG

>7200 len=160 tot-seq=1

TGGGGAATATTGGACAATGGGCGCAAGCCTGATCCAGCCATGCCGCGTGGGTGAAGAAGG

CCTTCGGGTTGTAAAGCCCTTTTGTGGCAAAGAAAAGCTTGCGGTTAATACCCGTGAGT

CATGACGGTACCCAAAGAATAAGCACCGGCTAACTTCGTG



>7201 len=160 tot-seq=1

TGGGGAATATTGCACAATGGGGGAAACCTGATGCAGCGACGCCGCGTGAACGAAGAAGG  
TATTCGTATCGTAAAGTTCTGTTGGTAGTGAAGAAAGATAGAGGTAGTAACTGGCCTTTA  
TTTGACGGTAATTACTTAGAAAAGTCACGGCTAACTACGTG

>7202 len=160 tot-seq=1

TGGGGAATATTGCACAATGGGGGAAACCGTGATGCAGCCATGCCGCGTGTGTGAAGAAGG  
CCTTCGGGTTGTAAAGCACTTTCAGTAGGGAGGAAAGGGTAAGGTTTAATACGCCTTATC  
TGTGACGTTACCTACAGAAGAAGGACCGGCTAACTCCGTG

>7203 len=160 tot-seq=1

TGGGGAAC TTTGGACAATGGGGCGCAAGCCTGATCCAGCAATGCCGCGTGCTGGATGAAGG  
CCTTCGGGTTGTAAACTGCTTTTGTACAGAACGAAAAGTCTTGGGTTAATACCCTGGGAT  
CATGACGGTACCGTAAGAATAAGCACCGGCTAACTACGTG

>7204 len=160 tot-seq=1

TAGGGAATCTCCACAATGGACGCAAGTCTGATGGAGCAACGCCGCGTGAGTGAAGAAGG  
CCTTCGGGTTGTAAAGCACTTTTGTCCGGAAAGAAATCGCGCTGGTTAATACCTGGCGTG  
GATGACGGTACCGGAAGAATAAGCACCGGCTAACTACGTG

>7205 len=160 tot-seq=1

TAGGAAATCTCCACAATGGACGCAAGTCTGATGGAGCAACGCCGCGTGAGTGAAGAAGG  
TTTTCGGATCGTAAACTCTGTTGTAAGAGGGGAACAAATTGTAGAGTAACTGCTACAGT  
CTTGACGGTATCTTACCAGAAAGCCACGGCTAACTACGTG

>7206 len=160 tot-seq=1

TAGGGAATTTTCGGCAATGGGGGCAACCTGACCGAGCAACGCCGCGTGAGTGAAGACGG  
CCTTCGGGTTGTAAACTCTGTTGTAAGAGAAGAACAATTGTAGAGTAACTGCTACAGT  
CTTGACGGTATCTTACCAGAAAGCCACGGCTAACTACGTG

>7207 len=160 tot-seq=1

TGGGGAATCTCCGCAATGGGGCGAAAGCCTGACGGAGCAACGCCGCGTGAGTGAAGACGG  
CCTTCGGGTTGTAAAGCTCTGTTGTTGGTGAAGAAGGACAGGGGTAGTAACTGACCTTTG  
TTTGATGGTAATCAATTAGAAAAGTCACGGCTAACTACGTG

>7208 len=160 tot-seq=1

TAGGGAATTTTCGTCAATGGGGGGAACCCTGAACGAGCAATGCCGCGTGAGTGAGAAAGG  
TCTTCGGATCGTAAAACCTCTGTTGTTAGAGAAGAACAGCGCATAGAGTAACTGTTATGCG  
TGTGACGGTATCTAACCAGAAAGCCACGGCTAACTACGTG

>7209 len=160 tot-seq=1

TGGGGAATATTGCACAATGGGCGCAAGCCTGATGCAGCGACGCCGCGTGAGGGATGGAGG  
CCTTCGGGTTGTAAACTGCTTTTGTGAGGGACGAAAAGGACCGTGTTAATACCATGGTCT  
GCTGACGGTACCTGAAGAATAAGCACCGGCTAACTACGTG

>7210 len=160 tot-seq=1

TGGGGAATATTGCACAATGGGGGAAACCCTGATGCAGCGACGCCGCGTGAAGGAAGAAGT  
AATTCGTTATGTAAACTTCTGTCATAGAGGAAGAGCGGTGGATATAGGGAATGATATCCA  
AGTGACGGTACTCTATAAGAAAGCCACGGCTAACTACGTG

>7211 len=160 tot-seq=1

TGGGGAATCTTCCGCAATGGACGAAAGTCTGACGGAGCAACGCCGCGTGAGTGATGACGG  
CCTTCGGGTTGTAAACTGCTTTTGTGAGGGACGAAAAGGACCGTGTTAATACCATGGTCT  
GCTGACGGTACCTGAAGAATAAGCACCGGCTAACTACGTG

>7212 len=160 tot-seq=1

TGGGGAATATTGGACAATGGGGGGAACCCTGATCCAGCCATGCCGCGTGTGTGAAGAAGG  
CCTTATGGTTGTAAAGCACTTTTCAAGCGGGGAGGAAGGGAGTAAAGTTAATACCTTTGCTC  
ATTGACGTTACCCGAGAAAGAACCGGCTAACTCCGTG

>7213 len=160 tot-seq=1

TGAGGAATATTGGTCAATGGACGAGAGTCTGAACCAGCCAAGTAGCGTGCAGGATGAAGG  
CCTTCGGGTTGTAAACTGCTTTTGTGAGGGACGAAAAGGACCGTGTTAATACCATGGTCT  
GCTGACGGTACCTGAAGAATAAGCACCGGCTAACTACGTG

>7214 len=160 tot-seq=1

TGAGGAATATTGCACAATGGAGGAAACTCTGATGCAGCGACGCCGCGTGAAGGATGAAGT  
ATTCGGTATGTAAAGTCTGTTATAAGGGAAGAACATTTGCAATAGGAAATGATTGCAG  
ACTGACGGTACCTTGTGAGAAAGCGATGGCTAACTATGTG

>7215 len=160 tot-seq=1

TGGGGAATATTGCACAATGGGCGAAAGCCTGATGCAGCAACGCCGCGTGAGCGATGAAGG

CCTTCGGGTCGTAAAGCTCTGTTGTTAAAGAAGAACGTGGGTAAGAGTAACTGTTTACCC  
AGTGACGGTATTTAACCCAGAAAGCCACGGCTAACTACGTG

>7216 len=160 tot-seq=1

TGGGGAATATTGCACAATGGGGGAAACCCTGATGCAGCGACGCCGCGTGAGTGAAGAAGT  
ATCTCGGTATGTAAAGCTCTGTTGTTAAAGAAGAACGTGGGTAAGAGTAACTGTTTACCC  
AGTGACGGTATTTAACCCAGAAAGCCACGGCTAACTACGTG

>7217 len=160 tot-seq=1

CAAGCAGAAGACGGCATAACGAGATATTGGCGTGACTGGAGTTCAGACTGTGCTCTTCCGA  
TCTCCTAGGGAGGCAGCAGCCAACGGCTTGACTTCTCTGGCCTCTGAGGCCACAACCTGGG  
CACTCCCTGCTTTCTCTCCATCTCTCACATCCACGGTCCC

>7218 len=160 tot-seq=1

TGGGGAATATTGGGCAATGGGCGCAAGCCTGACCCAGCAACGCCGCGTGAAGGAAGAAGG  
CTTTCGGGTTGTAAAGTACTTTTCAGCGGGGAGGAAGGGAGTAAAGTTAATACCTTTGCTC  
ATTGACGTTACCCGCAGAAGAAGCACCGGCTAACTCCATG

>7219 len=160 tot-seq=1

TGGGGAATCTTCTGCAATGGACGAAAGTCTGACGGAGCAACGCCGCGTGAGTGATGACGG  
CCTTCGGGTTGTAAAGCTCTGTTAATCGGGACGAATGGTCCTGTGTGAATAATGCAAGGA  
TTTGACGGTACCGGAGTAGAAAGCCACGGCTAACTACGTG

>7220 len=160 tot-seq=1

CTAAGAATATTCCGCAATGGGCGAAAGCCTGACGGAGCGACGCCGCGTGGATGATGAAGG  
CCGGAAGGTTGTAAAGTCTTTTATGACAGAGGAATAACCGGGGCAGGGAATGGCACCGG  
GGTGACTGTAGGTCATGAATAAGCACCGGCTAATTACGTG

>7221 len=160 tot-seq=1

CAGGGAATCTTCCACAATGGACGAAAGTCTGATGGAGCAACGCCGCGTGAGTGAAGAAGG  
TTTTCGAATCGTAAAGCTCTGTTGTTGGTGAAGAAGGATAGAGGTAGTGACTGGCCTTTA  
CTTGACGGTAATCAACCAGAAAGTCACGGCTAACTACGTG

>7222 len=160 tot-seq=1

TAGGGAATCTTCCACAATGGACGAAAGTCTGGTGGAGCAACGCTGCGTGAGTGAAGAAGG  
TTTTCGGATCGTAAAGCTCTGTTGTTGGTGAAGAAGGATAGAGGCAGTAACTGGCCTTTG

TTTGACGGTAATCAATTAGAAAAGTCACGGCTAACTACGTG

>7223 len=160 tot-seq=1

TAGGGAATCTTCCACAATGGACGAAAGTCTGATGGAGCAACGCCGCGTGAGTGAAGAAGG

TTTTCGGATCGTAAACTCTGTTATCAGGGAAGAACAACGTGTAAGTAACTGTGCACGT

CTTGACGGTACCTGATCAGAAAGCCACGGCTAACTACGTG

>7224 len=160 tot-seq=1

TAGGGAATTTTCGGCAATGGGGGACACCCTGACCGAGCAACGCCGCGTGAATGATGAAGT

ATTTCCGGTATGTAAATTCTTTTGTAGAGGACGAATGGCACTATCAGGAAATGGGTAGTG

AATGACGGTACTTTACGAATAAGCTCCGGCTAACTACATG

>7225 len=160 tot-seq=1

TAGGGAACCTTCCACAATGGACGAAAGTCTGATGGAGCAACGCCGCGTGAGTGTAGAAGG

TCTTCGGATCGTAAAGCTCTGTTGTTGGTGAAGAAGGATAGAGGTAGTAACCGGCCTTTA

TTTGACGGTAATCAACCAGAAAAGTCACGGCTAACTACGTG

>7226 len=160 tot-seq=1

TAGGGAATTTTCGGCAATGGGGGGAACCCTGACCGAGCAACGCCGCGTGAGTGAGGAAGG

CCTTCGGGCTGTAAAGCTCTGTTGCAGAGGAAGAACGGGAGAGCGAGGAAATGCGCTTTT

CGTGACGGTACTCTGCGAGGAAGCCACGGCTAACTACGTG

>7227 len=160 tot-seq=1

TGGGGAATATTGGACAATGGGCGAAAAGCCTGATCCAGCCATGCCGCGTGTGTGAAGAAGG

CTCTAGGGTTGTAAAGCACTTTTCAGTGGGGAGAAAAGTTCGTTCACTTAATACGTGAATGA

ATTGATGTTACCCACAGAAGAAGCACCGGCTAACTTCGTG

>7228 len=160 tot-seq=1

TAGGGAATCTTCCACAATGGGCGCAAGCCTGATGGAGCAACGCTGCGTGTGTGATGAAGG

GTTTCGGCTCGTAAACACTGTTATAAGAGAAGAACGGCACTGAGAGTAACTGTTTCAGTG

TGTGACGGTATCTTACCAGAAAAGGAACGGCTAAATACGTG

>7229 len=160 tot-seq=1

TAGGGAATTTTCGGCAATGGGGGAAAACCTTGACCGAGCAATGCCGCGTGAATGATGAAGG

TCTTCGGATCGTAAAGTTCTGTTGTTAAGGAAGAACTATGGGATTAGGAAATGAGTTCCA

TTTGACGGTACTTAACTAGAAAAGCCCCGGCTAACTATGTG

>7230 len=160 tot-seq=1

TGAGGAATTTTTACAATGGACGAAAGTCTGATGGAGCAATACCACGTGAGTGAAGAAGG  
TTTTCGGATCGTAAAGCTCTGTTGTTGGTGAAGAAGGATAGAGGTAGTAACTGGCCTTTA  
TTTGACGGTAATCAACCAGAAAGTCACGGCTAACTACGTG

>7231 len=160 tot-seq=1

TGGGGAATATTGCGCAATGGGGGAAACCCTGACGCAGCGACGCCGCGTTCGGGATGAAGG  
CCTTCGGGTTGTAAAGCTCTGTTGTTAGAGAAGAACGTGCGTGAGAGCAACTGTTACGC  
AGTGACGGTATCTAACCAGAAAGTCACGGCTAACTACGTG

>7232 len=160 tot-seq=1

TAGGGAATCTCCGCAATGGACGCAAGTCTGACGGAGCAACGCCGCGTGAGTGAAGAAGG  
TTTTCGGATCGTAAACTCTGTTGTGCGAGAAGAACACGTAAGCGAGTAACTGCGCTTAC  
CATGACGGTACCCGACCAGAAAGCCACGGCTAACTACGTG

>7233 len=160 tot-seq=1

TAGGGAGTATTCGGCAATGGGGGAAACCCTGACCGAGCAACGCCGCGTGAATGATGACGG  
CCTTCGGGTTGTAAAATTCTGTGGCGAGGAACGAATGGCAAGGAGAGGAAATGCTCTTTG  
TTTGACGGTACCTCGCTAGAAAGCCACGGCTAACTACGTG

>7234 len=160 tot-seq=1

TGGGGAATTTTGGACAATGGGCGCAAGCCTGATCCAGCCATTCCGCGTGCAGGATGAGGG  
CCTTCGGGTTGTAAACTGCTTTTGTACGGAACGAAAAGGCTTTCTCTAATACAGGGAGTC  
CATGACGGTACCGTAAGAATAAGCACCGGCTAACTACGTG

>7235 len=160 tot-seq=1

TAGGGAATTTTCGTCAATGGGGGAAACCCTGAACGAGCAATGCCGCGTGAGTGAAGAAGG  
TTTTCGGATCGTAAAGCTCTGTTGTTGGTGAAGAAGGATAGAGGTAGTAACTGGCCTTTA  
TTTGACGGTAATCAACCAAAAAGTCACGGCTAACTACGTG

>7236 len=160 tot-seq=1

TCGAGGATCATTGCAATGGGGGAAACCCTGACGATGCGACGCTGCGTGGAGGATGAAGG  
CCCTCGGGTCGTAAACTCCTGTCATGACGAAAAGGAGAGGGGACCCAACACGTCCCTTA  
TTTGATGGTACGTCAAGAGGAAGAGACGGCTAACTCTGTG

>7237 len=160 tot-seq=1

TCGAGGATCATTGCAATGGGCGAAAGCCTGACAATGCGACGCTGCGTGGAGGATGGAGG  
CCCTCGGGTTGTAAACTCCTGTCATGGGGGAAGAGGCGGACCGGCCCAATACGCCGGCGA  
GTTGACTGTACCCCAAGAGGAAGCGACGGCTAACTCTGTG

>7238 len=160 tot-seq=1

TTAGGAATATTCGTCAATGGGGGAAACCCTGAACGAGCAATGCCGCGTGAGTGATGAAGG  
TCTTTGGATTGTAAACTCTGTTGTATGGAAAGAATGGCTAAAATAGGAAATGATTTTAG  
TTTGACGGTACCATGCCAGAAAGCCCCGGCTAACTACGTG

>7239 len=160 tot-seq=1

TGGGGAATATTGGGCAATGGGCGCAAGCCTGACCCAGCAACGCCGCGTGAAGGAAGAAGG  
CTTTCGGGTTGTAAAGCTCTGTTGTTGGTGAAGAAGGACAGGGGTAGTAACTGACCTTTG  
TTTGACGGTAATCAATTAGAAAGTCACGGCTAACTACGTG

>7240 len=160 tot-seq=1

TAGGGAATCTCCACAATGGACGCAAGTCTGATGGAGCAACGCCGCGTGAGTGAAGAAGG  
GTTTCGGCTCGTAAAGCTCTGTTGTTGGAGAAGAACGTGCGTGAGAGTAACTGACCTTTG  
TTTGACGGTAATCAATTAGAAAGTCACGGCTAACTACGTG

>7241 len=160 tot-seq=1

GCGGCTGTACCTCCGGACGCAGGGTCAGGGAGTCACCGTTGCGATCTTCAAAGGTGTAC  
ATCTCTTTTCGACGATGTCGGTCACTTCACCGATGGAGCGCTTGAACAGCTCGGTGAAC  
TCGACGATCGGCATGCGGATCTGTTTGTAAACCGTAGTTAT

>7242 len=160 tot-seq=1

TGGGGAATATTGGGCAATGGGCGGAAGCCTGACCCAGCCACGCCGCGTGAGTGATGAAGG  
CCTTCGGGTTGTAAAGCTCTGTGGGAAGGGGCGAAAACTGCGAAGAGAATATCTAGCAG  
GTTGACGGTACCTTCTTAGCAAGCACCGGCTAACTCTGTG

>7243 len=160 tot-seq=1

TAGGGAATCTCCGCAATGGACGCAAGTCTGACGGAGCAACGCCGCGTGTGTGAAGAAGG  
TCTTCGGATCGTAAAGCACTGTTATTAGAGAAGAACACCCTGTAGAGTAACTGGCCTTTA  
TTTGACGGTAATCAACCAGAAAGTCACGGCTAACTACGTG

>7244 len=160 tot-seq=1

TGGGGAATTTTGGACAATGGGGGCAACCCTGATCCAGCCATCCC GCGTGTCGATGAAGG

CCTTCGGGTTGTAAAGCACTTTTGGCAGGAAAGAAACGGCGCCGGCTAATACCTGGCGCT  
AATGACGGTACCTGCAGAATAAGCACCGGCTAACTACGTG

>7245 len=160 tot-seq=1

TGGGGAATATTGCACAATGGTCGAAAGCCTGATGCAGCAACGCCGCGTGAGTGATGAAGG  
CCTTCGGGTCGTAAAGCTCTGTTGTTGGTGAAGAAGGACAGGGGTAGTAACTGACCTTTG  
TTTGACGGTAATCAATTAGAAAAGTCACGGCTAACTACGTG

>7246 len=160 tot-seq=1

TAGGGGATCTTCCACAATGGACGCAAGTCTGATGGAGCAACGTCGCGTGAGTGAAGAAGG  
GTTTTGGCTCGTAAAGCTCTGTTGCTGGTGAAGAAGGACGGGGGTAGTAACTGACCTTTG  
TTTGACGGTAATCAATTAGAAAAGTCGCGGCTAACTACGTG

>7247 len=160 tot-seq=1

CAGTGAGCTGAGATTGCGCCATTGCACTCTAGTCTGGGTGACAAAGCAAGACTCCGTCTC  
AAAAAAAAAAAAAGAAAAGAAAAGAAAATGTATGGAGAACAGTGCAAATTGTAAAAGTGCAT  
GCAAACCTTAGTTACTAGTTAATAATGCTCTCTGATATAC

>7248 len=160 tot-seq=1

CAGAGGTTGCAGTGAGCCGAGATCGTGCCACTGCACTTCAGCCTGGGGGACAGAGCAAGA  
CTCCATTTCAAAAATAAAAAATAAACATAAATAAAAAATAAAAACTGCATCGCCCAGCC  
TCCTTACAGAAATGGACAGCCATGTGACTAAGATCTGGA

>7249 len=160 tot-seq=1

TGGGGAATATTGGACAATGGGCGAAAGCCTGATCCAGCCATGCCGCGTGTGTGAAGAAGG  
CCTTATGGTTGTAAAGCACTTTAAGTGGGGAGGAAAAGCTTATGGATAACACCCATAGGT  
TCTGACGTTACCCACAGAATAAGCACCGGCTAACTCTGTG

>7250 len=160 tot-seq=1

TGGGGAATCTTGCACAATGGGCGAAAGCCTGATGCAGCGACGCCGCGTGCGGGATGAAGG  
CCTTCGGATCGTAAACTCTGTTGTAAGAGAAGAACAATTGTAGAGTAACTGCTACAGT  
CTTGACGGTATCTTACCAGAAAGCCACGGCTAACTACGTG

>7251 len=160 tot-seq=1

TGGGGAATCTTGCACAATGGGCGAAAGCCTGATGCAGCGACGCCGCGTGAGTGAAGAAGG  
GTTTCGGCTCGTAAACTCTGTTGTTGAAGAAGAACGTGCGTGAGAGTAACTGTTACGCG

AGTGACGGTATTCAACCAGAAAGTCACGGCTAACTACGTG

>7252 len=160 tot-seq=1

TGGGGAATATTGGACAATAGGCGCAAGCCTGATCCAGCCATGCCGCGTGAGTGAAGAAGG  
CCTTCGGGTTGTAAAGCTCTTTTGTCCGAAAGAAAAGCTGCCGGTTAATACCCGGTGGT  
TATGACGGTACCGGAAGAATAAGCACCGGCTAACTTCGTG

>7253 len=160 tot-seq=1

TAGGGAATTTTTACAATGGGCGCAAGCCTTATGAAGCAATGCCGCGTGAACGATGAAGG  
TTTTCGGATCGTAAAGCTCTGTTGTTGGTGAAGAAGGATAGAGGTAGTAACTGGCCTTTA  
TTTGACGGTAATCAACCAGAAAGTCACGGCTAACTACGTG

>7254 len=160 tot-seq=1

TGGGGAATATTGCGCAATGGGCGCAAGTCTGACGGAGCAATGCCGCGTGAGTGAAGAAGG  
CCTTCGGGTTGTAAACTCTGTCCTCATCCAAGAGAAGGAAAGGTAGTAACTGGCCTTTC  
CAGGACGGTAGATGAGGAGGAAGCCCCGGCTAACTATGTG

>7255 len=160 tot-seq=1

TGGGGAATATTGCACAATGGGCGCAAGCCTGATGCAGCCATGCCGCGTGTATGAAGAAGA  
CCTTCGGGTTGTAAAGTACTTTTCAGCGGGGAGGAAGGGAGTAAAGTTAATACCTTTGCTC  
ATTGACGGTAATCAATTAGAAAAGTCACGGCTAACTACGTG

>7256 len=160 tot-seq=1

TAGGGAATCTTCCACAATGGACGAAAGTCAGATGGAGCAACGCCGCGTGAGTGAAGAAGG  
TTTTCGGATCGTAAAGCTCTGTTGGTAGTGAAGAAAGATGGAGGTAGTAACTGGCCTTTA  
TTTGACGGTAATTAATTAGAAAAGTCACGGCTAACTACGTG

>7257 len=160 tot-seq=1

TGGGGAATTTTGGACAATGGACGCAAGTCTGATCCAGCCATTCCGCGTGCAGGATGAAGG  
CCCTCGGGTTGTAAACTGCTTTTGTACAGAACGAAAAGGTCCTGGTTAATACCTGGGGCT  
CATGACGGTACTGTAAGAATAAGCACCGGCTAACTACGTG

>7258 len=160 tot-seq=1

TCGGGAATATTGCACAATGGAGGAAACTCTGATGCGGTGACGCCGCGTATAGGAAGAAGG  
TTTTCGGATCGTAAAGCTCTGTTGTTGGTGAAGAAGGATAGAGGTAGTAACTGGCCTTTA  
TTTGACGGTAATCAACCAGAAAGTCACGGCTAACTACGTG



>7259 len=160 tot-seq=1

TCGAGAATCTTTTCGCAATGGGCGCAAGCCTGACGAAGCGACGCCGTGTGAGCGAAGAAGG  
CCTTCGGGTTGTAAAGCTCTTTTCGCTAGGGAACAAGAGAGATAGGATAACACCCTATTGA  
TTTGATGGTACTTGGTAAAGAAGCACCGGCTAACTCCGTG

>7260 len=160 tot-seq=1

TGGGGAATTTTGGACAATGGGCGCAAGCCTGATCCAGCCATGCCGCGTGAGTGAAGAAGG  
CCTTCGGGTTGTAAAGCTCTTTTCGGCAGGAACGAAATGGTTCGTGCTAATACCACGGACT  
GATGACGGTACCTGAAGAAGAAGCACCGGCTAACTACGTG

>7261 len=160 tot-seq=1

TGGGGGATATTGCACAATGGAGGCAACTCTGATGCAGCAACGCCGCGTGAGTGAAGAAGG  
CCTTCGGGTTGTAAACTCTGTCTCATCCAAGAGAAGGGAAGGTAGTAACTGACCTTTC  
CAGGACGGTAGATGAGGAGGAAGCCCCGGCTAACTATGTG

>7262 len=160 tot-seq=1

TGGGGAATATTGCACAATGGACGAAAGTTTGATGCAGCGACGCCGCGTGGAGGGTGTAGG  
CCTTCGGGTTGTAAAGTACTTTTCAGCGGGGAGGAAGGGAGTAAAGTTAATACCTTTGCTC  
ATTGACGTTACCCGCAGAAGAAGCACCGGCTAACTCCGTG

>7263 len=160 tot-seq=1

TGGGGAATATTGCGCAATGGGGGAAACCCTGACGCAGCGACGCCGCGTGAGTGAAGAAGG  
CCTTCGGGTTGTAAACTCTGTCTTCATCCAAGAGAAGGGAAGGTAGTAACTGACCTTTC  
CAGGACGGTAGATGAGGAGGAAGCCCCGGCTAACTATGTC

>7264 len=160 tot-seq=1

TAGGGAATCTTCGGCAATGGACGAAAGTCTGACCGAGCAACGCCGCGTGAGTGAAGAAGG  
TTTTCGGATCGTAAACTCTGTTGTTAGAGAAGAACAAGGACGTTAGTAACTGAACGTCC  
CCTGACGGTAATTACTIONTAGAAAGTCACGGCTAACTACGTG

>7265 len=160 tot-seq=1

TAGGGAATCTTCGCAATGGACGCAAGTCTGACGGAGCAACGCCGCGTGAGTGAAGAAGG  
ATTTTCGGTTCGTAAACTCTGTTGGTAGTGAAGAAAGATAGAGGTAGTAACTGGCCTTTA  
TTTGACGGTAATTACTIONTAGAAAGTCACGGCTAACTACGTG

>7266 len=160 tot-seq=1

TAGGGAATTTTTACAATGGGCGCAAGCCTTATGAAGCAATGCCGCGTGTGTGAAGAAGG  
CCCTCGGGTTGTAAAGCACTTTCAGTGAGGAAGAACGCCTGGTGGTTAATACCCATCAGG  
AAAGACATCACTCACAGAAGAAGCACCGGCTAACTCCGTG

>7267 len=160 tot-seq=1

TAGGGAATCTCCGCAATGGACGCAAGTCTGACGGAGCAACGCCGCGTGAGTGAAGAAGG  
ATTTTCGGTTCGTAAAACCTCTGTTGTTAGAGAAGAACAGCGCATAGAGTAACTGTTATGCG  
TGTGACGGTACCTGCAGAAGAAGCCCCGGCTAACTACGTG

>7268 len=160 tot-seq=1

TGGGGAATATTGCGCAATGGGGGAAACCCTGACGCAGCGACGCCGCGTGAGTGAAGAAGG  
ATTTTCGGTTCGTAAAGCTCTGTTGTTAGGGAAGAATGATTGTGTAGTAACTATAACACAGT  
AGAGACGGTACCTAACCCAGAAAGCCACGGCTAACTACGTG

>7269 len=160 tot-seq=1

TGGGGAATATTGCACAATGGGCGCAAGCCTGATGCAGCAACGCCGCGTGTGTGAAGAAGG  
TCTTCGGATCGTAAAGCACTGTTGTTAGAGAAGAACGACCGCTAGAGTAACTGTTAGCGG  
AGTGACGGTATCTAACCCAGAAAGCCACGGCTAACTACGTG

>7270 len=160 tot-seq=1

TCGAGGATCATTGCAATGGGCGAAAGCCTGACAATGCGACGCTGCGTGGAGGATGAAGG  
CCTTCGGGTTGTAAACTCCTGTCATAAGGGAACAGGCGAGGATACCCAATACGTATCCGA  
GTTGAGTGTACTTTAAGAGGAATTGGCGGCTAACTCTGTG

>7271 len=160 tot-seq=1

TGGGGAATTTTGGACAATGGGCGCAAGCCTGATCCAGCAATGCCGCGTGAGTGAAGAAGG  
CCTTCAGGTTGTAAAGCTCTTTTGTGAGGGAAGAAACGGGATTGGATAATACCTAGTCCT  
AATGACGGTACCTGAAGAATAAGCACCGGCTAACTACGTG

>7272 len=160 tot-seq=1

TGGGGAATTTTGGACAATGGGCGCAAGCCTGATCCAGCCATGCCGCGTGTCTGAAGAAGG  
CCTTCGGGTTGTAAAGGACTTTTGTTCGGGAGGAAATCCCGCTGGTTAATACCTGGCGGG  
GATGACAGTACCGGAAGAATAAGCACCGGCTAACTACGTG

>7273 len=160 tot-seq=1

TGGGGAATATTGGACAATGGGGGAAACCCTGATCCAGCCATGCCGCGTGTGTGAAGAAGG

CCTTTTGGTTGTAAAGCACTTTAAGCAGTGAAGAAGACTCTTCGGTTAATACCCGGAGAC  
GATGACATTAGCTGCAGAATAAGCACCGGCTAACTCTGTG

>7274 len=160 tot-seq=1

TGAGGAATATTGGTCAATGGGCGCTAGCCTGAACCAGCCAAGTAGCGTGTATGAAGAAGG  
CCTTCGGGTTGTAAAGTACTTTTCAGCGGGGAGGAAGGGAGTAAAGTTAATACCTTTGCTC  
ATTGACGTTACCCGCAGAAGAAGCACCGGCTAACTCTGTG

>7275 len=160 tot-seq=1

TGGGGAATATTGGACAATGGAGGTAECTCTGATCCAGCAATTCTGTGTGTGAAGAAGG  
TTTTAGGACTGTAAAGTTCTTTTATATGGGAAGAAATGCTAAAATAGGAAATGATTTTAG  
TTTACTGTACCATTTGAATAAGTATCGGCTAACTATGTG

>7276 len=160 tot-seq=1

TGGGGAATATTGCACAATGGGCGCAAGCCTGATGCAGCCATGCCGCGTGTATGAAGAAGG  
CCTTCGGGTTGTAAAGTACTTTTCAGTCGGGAGGAAGGTGGTAAGTTAATACCTTTGCTC  
ATTGACGTTACCCGCAGAAGAAGCACCGGCTAACTCCGTG

>7277 len=160 tot-seq=1

TGGGGAATATTGCACAATGGGGGAAACCCTGATGCAGCAACGCCGCGTGAGTGATGAAGG  
TTTTCGGATCGTAAAGTACCTTCAGCGGGGAGGAAGGGAGTAAAGTTAATACCTTTACTC  
ATTGACGTTACCCGCAGAAGAAGCACCGGCTAACTCCGTG

>7278 len=160 tot-seq=1

ACAGTTCATGTGAATTTGTTAATGTAAATACATCCTCTATTTATCTTTGGCTGTTAAT  
AAATTCATGCATTATTAGAAAATCCCTCATACCAGCAGACCCGCTGAGTTAGATCAGTTC  
GTTTTAAGAGATTTCTGTTGGCAGGATTCAAAGCCCACA

>7279 len=160 tot-seq=1

TAGGGAGTTTTTCGGCAATGGGGGAAACCTTGACCGAGCAACGCCGCGTGAGTGATGAAGG  
TCTTCGGATCGTAAAGCTCTGTTACGAGGGACGAAGGACCGGCTCAGGAAATGGGGCCGG  
TTTGACGGTACCTCGCCAGAAAGTGACGGCTAACTACGTG

>7280 len=160 tot-seq=1

TCGAGGATCATTTGCAATGGGCGAAAGCCTGACAATGCGACGCTGCGTGGAGGATGAAGG  
CCTTCGGGTTGTAACTCCTGTCATGGGGGAACAGGCGAGGGGACCCAACACGTCCCTTA

GTTGAGTGTACCCCAAGAGGAAGCGACGGCTAACTCTGTG

>7281 len=160 tot-seq=1

TTAGGAATATTCGTCAATGGAGGAACTCTGAACGAGCAATGCCGCGTGAGTGATGAAGG  
TCTTTGGATTGTAAACTCTGTTGTATGTGAAGAACGACTAAATAAGGAAATGTATTTAG  
AGTGACGGTAGCATACCAGAAAGCCCCGGCTAACTACGTG

>7282 len=160 tot-seq=1

TAGGGAATCTTCCACAATGGACGCAAGTCTGATGGAGCAACGCCGCGTGAGTGAAGAAGG  
GTTTCGGCTCGTAAAGCTCTGTTGTTGGAGAAGGGGGACAGGGGGAGTAACTGACCTTTG  
TTTGACGGTAATCAATTAGAGAGTCACGGGGA ACTACGTG

>7283 len=160 tot-seq=1

TTTTTTTTTTCAAGCAGAAGACGGCATAACGAGATTTATCCGTGACTGTAGTTCAGACGTG  
TGCTCTCCGATCTCATAACGGGAGGCAGCAGGAAGGAGAAAGAGGGGGTGGTGGGGACAG  
TGACAGAGAAGGATTGTGCCACAGATGGTGACATAGAGAG

>7284 len=160 tot-seq=1

TAGGGAATTTTCGTCAATGGGGGGAACCTGAACGAGCAATGCCGCGTGAGTGAAGAAGG  
CCTTCGGGTCGTAAAGCTCTGTTGTAAGAGAAAACGGTCATTATAGGGAATGATAATGA  
AGTGATGGTATCTTACCAGAAAGCCACGGCTAACTACGTG

>7285 len=160 tot-seq=1

TGGGGAATTTTGGACAATGGGGGCAACCCTGATCCAGCAATGCCGCGTGAGTGAAGAAGG  
CCCTCGGGTTGTAAAGCTCTTTTGTGAGGGAAGAAACGGGTGAGGCTAATATCCCCATCT  
AATGACGGTACCTGAAGAATAAGCACCGGCTAACTACGTG

>7286 len=160 tot-seq=1

TGGGGAATATTGCACAATGGGGGAAACCCTGATGCAGCCATGCCGCGTGTGTGAAGAAGG  
CCTTCGGGTTGTAAAGCACTTTCAGCGAGGAGGAAAGGGTAGTGGCTAATATCCGCTACC  
TGTGACGTTACTCGAGAAGAAGCACCGGCTAACTCCGTG

>7287 len=160 tot-seq=1

TGGGGAATTTTGGACAATGGGCGAAAGCCTGATCCAGCCATGCCGCGTGAGTGAAGAAGG  
CCTTCGGGTTGTAAAGCTCTTTCAGTCGGAAAGAAAAGGCGCCGGATAATACCTGGCGCT  
GATGACGGTACCGACAGAAGAAGCACCGGCTAACTACGTG

>7288 len=160 tot-seq=1

TAGGGAATTTTCGGCAATGGAGGAACTCTGACCGAGCAACGCCGCGTGAATGAAGAAGT  
ATTCGGTATGTAAAGTTCTTTTATTAAGGAAGAATGTGTTTTATAGGAAATGATAGAAC  
AGTGACGGTACTTAATGAATAAGCCCCGGCTAACTATGTG

>7289 len=160 tot-seq=1

TGGGGAATATTGGACAATGGGGGCAACCCTGATCCAGCCATGCCGCGTGTGTGAAGAAGG  
CCTTCGGGTTGTAAAGCACTTTCAGCGAGGAAGAACGCCAGGGAATTAATACCTCCCTGG  
AAAGACATCACTCGCAGAAGAAGCACCGGCTAACTCCGTG

>7290 len=160 tot-seq=1

TAGGGAATCTCCACAATGGGCACAAGCCTGATGGAGCAACACCGCGTGAGTAAAGAAGG  
GTTTCGGCTCGTAAAGCTCTGTTGTTGGAGAAGAGCGTGTGCGAGAGTAACTGTTACGC  
AGTGACGGTATCCAACCAGAAAGTCACGGCTAACTACGTG

>7291 len=160 tot-seq=1

TGGGGAATATTGGACAATGGGCGAAAGCCTGATCCAGCCATGCCGCGTGTGTGAAGAAGG  
TCTTCGGATTGTAAAGCTCTGTTGGTAGTGAAGAAAGATAGAGGTAGTAACTGGCCTTTA  
TTTGACGGTAATTACTIONTAGAAAGTCACGGCTAACTATGTG

>7292 len=160 tot-seq=1

TAGGGAATCTCCACAATGGACGCAAGTCTGATGGAGCAACGCCGCGTGAGTGAAGAAGG  
GTTTCGGGTTGTAAAGCACTTTCAGTAAGGAGGAAAGGTTAAGTTTTAATAGAGCTTAGC  
TGTGACGTTACTTACAGAAGAAGCACCGGCTAACTCCGTG

>7293 len=160 tot-seq=1

TGGGGAATATTGCACAATGGGCGCAAGCCTGATGCAGCCATGCCGCGTGTGTGAAGAAGG  
CCTTCGGGTTGTAAAGCTCTGTTGTTGGAGAAGAACGTGCGTGAGAGTAACTGTTTCATGC  
AGTGACGGTATCCAACCAGAAAGTCACGGCTAACTACGTG

>7294 len=160 tot-seq=1

TGGGGAATATTGGACAATGGGCGCAAGCCTGATCCAGCCATGCCGCGTGAGTGATGAAGG  
CCCTAGGGTTGTAAAGCTCTTTCAGCGGGGAGGAAGGCGGTGAGGTTAATAACCTCATCG  
ATTGACGTTACCCGCAGAAGAAGCACCGGCTAACTCCGTG

>7295 len=160 tot-seq=1

TAGGGAATCTTCGGCAATGGACGGAGGTCTGACCGAGCAACGCCGCGTGAGTGAAGAAGG  
TTTTCGGATCGTAAAGCTCTGTTGTTAGAGAAGAACGTGCGTGAGAGCAACTGTTACGC  
AGTGACGGTATCTAACCGAAAAGTCACGGCTAACTACGTG

>7296 len=160 tot-seq=1

TGGGGAATATTGCACAGTGGGCGCAAGCCTGATGCAGCGACGCCGCGTGCGGGATGACGG  
CCTTCGGGTTGTAAACTCTGTCTCATCCAAGAGAGACCTGTAGTAACTGCCAGGTC  
TAGGACGGTAGATGAGGAGGAAGCCCCGGCTAACTATGTG

>7297 len=160 tot-seq=1

TAGGGAATCTTCGGCAATGGGCGCAAGCCTGATGCAGCGACGCCGCGTGCGGGATGAAGG  
CCTTCGGGTTGTAAACCGCTTTTGTGAGAGACGAAAAGGGATGTACGAATAATACGTTCC  
GCTGACGGTATCTGAAGAATAAGCACCGGCTAACTACGTG

>7298 len=160 tot-seq=1

TAGGGAATTTTCGTCAATGGGGGCAACCCTGAACGAGCAATGCCGCGTGAGCGAAGAAGG  
TCTTCGGATTGTAAAGCTCTGTTGAAGGGGAAAAAGAGCGGAGAGAGGAAATGGTCTCCG  
ATTGATATTACCCTTCGAGGAAGTCACGGCTAACTACGTG

>7299 len=160 tot-seq=1

TAGGGAATTTTCGTCAATGGGCGCAAGCCTGAACGAGCAATGCCGCGTGAACGAGGAAGG  
CCTTCGGGTTGTAAAGTACTTTTCAGCGGGGAGGAAGGGAGTGAGGTTAATAACCTTATTC  
ATTGACGTTACCCGCAGAAGAAGCACCGGCTAACTCCGTG

>7300 len=160 tot-seq=1

TAGGGAATCTTCGGCAATGGGGGGAACCCTGACCGAGCAACGCCGCGTGAGTGAGGAAGG  
TCTTCGGATCGTAAAGCTCTGTTGTAAGAGAAAAACGGCGCTCATAGGGAATGATGAGTG  
AGTGATGGTATCTTACCAGAAAAGTCACGGCTAACTACGTG

>7301 len=160 tot-seq=1

TCGAGAATCATTACAATGGGGGAAACCCTGATGGAGCAACGCCGCGTGGGTGAAGAAGG  
TCTTCGGATCGTAAACCCCTGTTGTTAGAGAAGAAAGTGCGTGAGAGTAACTGTTACGTC  
TTCGACGGTATCTAACCGAAAAGCCACGGCTAACTACGTG

>7302 len=160 tot-seq=1

TGAGGAATATTGGTCAATGGGCGCAAGCCTGAACCAGCCATGCCGCGTGACAGGAAGACGG

CTCTATGAGTTGTAAACTGCTTTGTCAGGGAAGAAAAGGTCTGTGTTAATACCATAGACT  
GCTGACGGTACCTGAAGAATAAGCACCGGCTAACTACGTG

>7303 len=160 tot-seq=1

TGGGGAATATTGCACAATGGGCGAAAGCCTGACGCAGCGACGCCGCGTGAGGGATGAAGG  
TTTTCGGATCGTAAACCTCTGTCGGAAGGGAAGAAAGTGCCTGGTGCTAATCAGCCGCGT  
ATTGACGGTACCTTCAAAGGAAGCACCGGCTAACTCTGTG

>7304 len=160 tot-seq=1

TGGGGAATATTGCACAATGGGCGCAAGTCTGACGGAGCAACGCCGCGTGAGTGATGACGG  
TCTTCGGATTGTAAAGCTCTGTTAATCGGGACGAATGGTTTGTGTGCAAATAGTGCATAG  
ACATGACGGTACCGGAATAGAAAGCCACGGCTAACTACGT

>7305 len=160 tot-seq=1

TAGGGAATCTTCCACAATGGGCGCAAGCCTGAACGAGCAATGCCGCGTGAACGAGGAAGG  
TCTTCGGATCGTAAAGTTCTGTTGAAGGGGAAAAAGAGCGGAGAGAGGAAATGCTTTCTG  
ATTGATATTACCCTTCGAGGAAGTCACGGCTAACTACGTG

>7306 len=160 tot-seq=1

TGGGGAATCTTCCGCAATGGACGAAAGTCTGACGGAGCAACGCCGCGTGAGTGATGACGG  
TCTTCGGATTGTAAACTGCTTTTGTGTCAGGGAAGAAAAGGTCTGTGTTAATACCATAGACT  
GCTGACGGTACCTGAAGAATAAGCACCGGCTAACTACGTG

>7307 len=160 tot-seq=1

TGGGGAATATTGCGCAATGGGGGAAACCCTGACGCAGCGACGCCGCGTGCGGGATGAAGG  
TCTTCGGATTGTAAACTGCTTTTGTGTCAGGGACGAAAAGGGATGCGATAACACCGCATTCC  
GCTGACGGTACCTGAAGAATAAGCACCGGCTAACTACGTG

>7308 len=160 tot-seq=1

TAGGGAATCTTCCACAATGGACGCAAGTCTGATGGAGCAACGCCGCGTGAGTGAAGAAGG  
ATTTCCGTTTCGTAAACTCTGTTGTTAGAGAAGAACAGTGCATAGAGTAACTGTTATGCG  
TGTGACGGCATCTAACCGAAAAGCCACGGCTAACTACGTG

>7309 len=160 tot-seq=1

TAGGGAATCTTCCGCAATGGACGCAAGTCTGACGGAGCAACGCCGCGTGAGTGAAGAAGG  
ATTTCCGTTTCGTAAACTCTGTTGTTAGAGAAGAACACGAGTGAGAGTAACTGTTTCATTC

GATGACGGTATCTAACCAGCAAGTCACGGCTAACTACGTG

>7310 len=160 tot-seq=1

TAGGGAATCTTCCACAATGGACGCAAGTCTGATGGAGCAACGCCGCGTGAGTGAAGAAGG

TCTTCGGATCGTAAACTCTGTTGTTAGAGAAGAACACGAGTGAGAGTAACTGTTTCATTC

GATGACGGTACCGGAATAGAAAGCCACGGCTAACTACGTG

>7311 len=160 tot-seq=1

TGGGGAATATTGCACAATGGGCGCAAGCCTGATGCAGCAACGCCGCGTGAACGATGAAGG

TCTTCGGATTGTAAACTGCTTTTGCCAGGGACGAAAAGGGATGCGATAACACCGCATTCC

GCTGACGGTACCTGAAGAATAAGCACCGGCTAACTACGTG

>7312 len=160 tot-seq=1

TGGGGGATATTGCACAATGGAGGCAACTCTGATCCAGCCATGCCGCGTGCAGGACGAAGG

TCTTCGGATTGTAAACTGCTTTTGTGAGGGAAGAAAAGGTCTGTGTTAATACCATAGACT

GCTGACGGTACCTGAAGAATAAGCACCGGCTAACTACGTG

>7313 len=160 tot-seq=1

TAGGGAATTTTCGGCAATGGGGGAAACCCTGACCGAGCAACGCCGCGTGAATGATGAAGT

ATTCGGTATGTAAATTCTTTTATAGAGGACGAATGTTACTAATAGGAAATGATTAGTA

AGTGACGGTACTTTATGAATAAGCCCCGGCTAACTACGTG

>7314 len=160 tot-seq=1

TGGGGAATATTGCACAATGGGCGAAAGCCTGATGCAGCGACGCCGCGTGAGCGAAGAAGT

ATTCGGTATGTAAAGCTCTATCAGAAGGGAAGAAAAGGTCTGTGTTAATACCATAGACT

GCTGACGGTACCTGAAGAATAAGCACCGGCTAACTACGTG

>7315 len=160 tot-seq=1

TGGGGGATTTTGGACAATGGGGGCAACCCTGATCCAGCCATGCCGCGTGCAGGATGAAGG

TCTTCGGATTGTAAACTGCTTTTGTGAGGGAAGAAAAGGTCTGTGTTAATACCATAGACT

GCTGACGGTACCTGAATAGAAAGCCACGGCTAACTACGTG

>7316 len=160 tot-seq=1

TGGGGAATATTGCGCAATGGGGGAAACCCTGACGGAGCAACACCGCGTGAGTGAAGAAGG

GTTTCGGCTCGTAAAGCTCTGTTGTTAGAGAAGAACGTGCGTGAGAGCAACTGTTACGCG

AGTGACGGTATCTAACCAGAAAGTCACGGCTAACTACGTG



>7317 len=160 tot-seq=1

TAGGGAATCTCCACAATGGGCGCAAGCCTGATGGAGCAACACCGCGTGAGTGAAGAAGG  
GTTTCGGCTCGTAAAGCTCTGTTGTTGAAGAAGAATGTGCAAGAGAGTAACTGTTCTTGT  
ATTGACGGTATTCAACCAGAAAGTCACGGCTAACTACGTG

>7318 len=160 tot-seq=1

TGAGGAATATTGGTCAATGGCCGAAGGGCTGAACCAGCCAAGTCGCGTGAGTGATGAAGG  
TCTTCGGATCGTAAACTCTGTTATTAGGGAAGAACATATGTGTAAGTAACTGTGCACAT  
CTTGACGGTACCTAATCAGAAAGCCACGGCTAACTGCGTG

>7319 len=160 tot-seq=1

TGGGGAATATTGCACAATGGGCGCAAGCCTGATGCAGCCATGCCGCGTGATGAAGAAGG  
CCTTCGGATCGTAAACTCTGTTATTAGGGAAGAACATATGTGTAAGTAACTGTGCACAT  
CTTGACGGTACCTAATCAGAAAGCCACGGCTAACTACGTG

>7320 len=160 tot-seq=1

TAGGGAATCTCCGCAATGGGCGAAAGCCTGACGGAGCAACGCCGCGTGATGAAGAAGG  
CCTTCGGGTTGTAAAGTACTTTAGTCGTGAGGAAGGGGGTATCGTTAATAGCGGTATTC  
TTTGACGTTAGCGACAGAAGAAGCACCGGCTAACTCCGTG

>7321 len=160 tot-seq=1

TAGGGAATCTCCGCAATGGGCGAAAGCCTGATCCAGCAATGCCGCGTGCAGGATGAAGG  
CCTTCGGGTTGTAAACTGCTTTTGTACGGAACGAAAAAGCTCCTTCTAATATAGGGGGCC  
CATGACGGTACCGTAAGAATAAGCACCGGCTAACTACGTG

>7322 len=160 tot-seq=1

TAGGGAATCTCCACAATGGGTGCAAACCTGATGGAGCAATGCCGCGTGAGTGAAGAAGG  
ACTTCGGTTCGTAAAGCTCTGTTGTTAGAGAAGAACAAGGATAGGAGTAACTGTCTATCC  
CTTGACGGTACCTAACCAGAAAGTCACGGCTAACTACGTG

>7323 len=160 tot-seq=1

TGGGGAATATTGACAATGGGCGCAAGCCTGATCCAGCCATACCGCGTGGGTGAAGAAGG  
CCTTCGGGTTGTAAAGCCCTTTTGTGGGAAAGAAATCTTTCAGGCTAATACCCTGGGAG  
GATGACGGTACCCAAAGAATAAGCACCGGCTAACTTCGTG

>7324 len=160 tot-seq=1

TGGGGAATCTTCGCAATGGACGAAAGTCTGACGGAGCAACGCCGCGTGAGTGAAGAAGG  
TCTTCGGATTGTAAAGTTCTTTTATATGGGAAGAAACGCTAAAATAGGAAATGATTTTAG  
TTTACTGTACCATTTGAATAAGTATCGGCTAACTATGTG

>7325 len=160 tot-seq=1

TGGGGAATCTTCGGCAATGGACGGAAGTCTGACCGAGCAACGCCGCGTGAGTGAAGAAGG  
TTTTCGGATCGTAAAGCACTTTAAGTTGGGAGGAAGGGTTGTAGATTAATACTCTGCAAT  
TTTGACGTTACCGACAGAATAAGCACCGGCTAACTCTGTG

>7326 len=160 tot-seq=1

TGGGGAATCTTCGCAATGGACGGAAGTCTGGCCGAGCAACGCCGCGTGAGTGAAGAAGG  
TTTTCGGATCGTAAAGCTCTGTCGTGAGAGAAGAACGAGTGTGAGAGTGGAAAGTTCACA  
CTGTGACGGTATCTTACCAGAAAGGGACGGCTAACTACGT

>7327 len=160 tot-seq=1

TGGGGAATTTTGGACAATGAGCACAAGCCTGATCCAGCAATGCCGCGTGAGTGAAGAAGG  
CCTTCGGGTTGTAAAGCTCTTTTGTGAGGGAAGAAACGGCTGTGGGTAATATCCATGGCT  
AATGACGGTACCTGAAGAATAAGCACCGGCTAACTACGTG

>7328 len=160 tot-seq=1

TGGGGAATCTTGCACAATGGGCGAAAGCCTGATGCAGCGACGCCGCGTGCGGGATGAAGG  
GTTTCGGCTCGTAAAGCTCTGTTGTTGGTGAAGAAGGACAGGGGTAGTAACTGACCTTTG  
TTTGACGGTAATCAATTAGAAAAGTCACGGCTAACTACGTG

>7329 len=160 tot-seq=1

TAGGGAATTTTCGTCAATGGGGGGAACCCTGAACGAGCAATGCCGCGTGAGTGAAGAAGG  
TCTTCGGATCGTAAAGCTCTGTTGTAAGAGAAAAACGGTCTCCATAGGGAATGATGGAGA  
AGTGATGGTATCTTACCAGAAAGCCACGGCTAACTACGTG

>7330 len=160 tot-seq=1

TGGGGAATTTTGGACAATGGGGGCAACCCTGATCCAGCAATGCCGCGTGAGTGAAGAAGG  
CCTTCGGGTTGTAAAGCTCTTTTGTGAGGGAAGAAAAGGGCTGGGTTAATACCCTGGTTT  
CATGACGGTACCTGAAGAATAAGCACCGGCTAACTACGTG

>7331 len=160 tot-seq=1

TGGGGAATATTGCGCAATGGGGGAAAGTCTGACGGAGCAACGCCGCGTGAGTGATGAAGG

TCTTCGGATTGTAAAACCTCTGTTGTCAGGACGAATGTAAGTACTGATCTATAATACATTTTCGGT  
ATTGACGGTACCTGACGAGGAAGCCACGGCTAACTACGTG

>7332 len=160 tot-seq=1

TGGGGAATTTTGCACAATGGGGGAAAGTCTGACGGAGCAACGCCGCGTGAGTGATGACGG  
TCTTCGGATTGTAAAGCTCTGTTAATCGGGACGAATGGTCGGTGTGCAAATAGTGCATGG  
ACATGACGGTACCGGAATAGAAAGCCACGGCTAACTACGT

>7333 len=160 tot-seq=1

TGGGGAATATTGCACAATGGGCGCAAGCCTGATGCAGCCATGCCGCGTGAATGAAGAAGG  
CCTTAGGGTTGTAAAGTCTTTTCGGTATTGAGGAAGGGGTGTGTGCTAATAGTACACATC  
ATTGACGTTAAATACAGAAGAAGCACCGGCTAACTCCGTG

>7334 len=160 tot-seq=1

TGGGGAATATTGCACAATGGGCGCAAGCCTGATGCAGCGACGCCGCGTGTGTGAAGAAGG  
TCTTCGGATTGTAAAGCACTTTAAGTTGGGAGGAAGGGCAGTAAGTTAATACCTTGCTGT  
TTTGACGTTACCAGCAGAATAAGCACCGGCTAACTTCGTG

>7335 len=160 tot-seq=1

TGGGGAATATTGCACAATGGGCGCAAGCCTGATGCAGCGACGCCGCGTGAGTGAAGAAGG  
GTTTCGGCTCGTAAAGCTCTGTTGTTAAGAAGAACACGTATGAGAGTAACTGTTTCATAC  
GTTGACGGTATTTAACCAGAAAGTCACGGCTAACTACGTG

>7336 len=160 tot-seq=1

TGGGGAATATTGCACAATGGGCGCAAGCCTGATGGAGCAACACCGCGTGAGTGAAGAAGG  
GTTTCGGCTCGTAAAGCTCTGTTGTTGGAGAAGAACAAGGACGTTAGTAACTGAACGTCC  
CCTGACGGTATCTAACCAGAAAGCCACGGCTAACTACGTG

>7337 len=160 tot-seq=1

TAGGGAATTTTCGTCAATGGGGGGAACCCTGAACGAGCAATGCCGCGTGAGTGAGGAAGG  
TCTTCGGATCGTAAAGCTCTGTTGTTGGAGAAGAACGTGCGTGAGAGTAACTGTTACACG  
AGTGACGGTATCCAACCAGAAAGTCACGGCTAACTACGTG

>7338 len=160 tot-seq=1

TAGGGAATTTTCGTCAATGGGGGGAACCCTGAACGAGCAACACCGCGTGAGTGAAGAAGG  
GTTTCGGCTCGTAAAGCTCTGTTGTTGGAGAAGAACGTGCGTGAGAGTAACTGTTACACG

AGTGACGGTATCCAACCAGAAAGTCACGGCTAACTACGTG

>7339 len=160 tot-seq=1

TAGGGAATCTTCGGCAATGGACGAAAGTCTGACCGAGCAACGCCGCGTGAGTGAAGAAGG

TTTTCGGATCGTAAACTCTGTTGTTAGAGAAGAACAAGGATGAGAGTAACTGTTACGC

AGTGACGGTATCCAACCAGAAAGTCACGGCTAACTACGTG

>7340 len=160 tot-seq=1

TAGGGAATCTTCACAATGGGCGCAAGCCTGATGGAGCAACGCCGCGTGAGTGAAGAAGG

GTTTCGGCTCGTAAAGCTCTGTTGTTAAAGAAGAACACGTATGAGAGTAACTGTTACGC

AGTGACGGTATCCAACCAGAAAGTCACGGCTAACTACGTG

>7341 len=160 tot-seq=1

TAGGGAATCTTCGGCAATGGACGAAAGTCTGACCGAGCAGCGCCGCGTGAGTGAAGAAGG

CCTTCGGGTCGTAAATTCTGTTGTCAGAGAAGAACGTGCGTGAGAGTAACTGTTACGT

ATTGACGGTATCTGACCAGAAAGCCACGGCTAACTACGTG

>7342 len=160 tot-seq=1

TAGGGAATTTTCGGCAATGGGGGAAACCCTGACCGAGCAACGCCGCGTGAGTGAAGAAGG

CCTTCGGGTTGTAAAGCTCTGTTGTAAGGGAAGAACGATAGTTAGAGGGAATGCTAGCTA

TATGACGGTACCTTACCAGAAAGCCACGGCTAACTACGTG

>7343 len=160 tot-seq=1

TGGGGAATATTGGACAATGGAGGCAACTCTGATCCAGCAATTCTATGTGTGTGAAGAAGG

TCTTCGGATTGTAAAGTGCTGTTATAAGGGAAGAACATTTGCAATAGGAAATGATTGCAG

ACTGACGGTACCTTGTACAGAAAGCGATGGCTAACTATGTG

>7344 len=160 tot-seq=1

TGAGGAATATTGGTCAATGGACGCAAGTCTGATGGAGCAACGCCGCGTGAGTGGAGAAGG

GTTTCGGCTCGTAAAGCTCTGTTGTTGGTGAAGAAGGACAGGGGTAGTAACTGACCTTTG

TTTGACGGTAATCAATTAGAAAGTCACGGCTAACCACGTG

>7345 len=160 tot-seq=1

TGGGGAATTTTGACAATGGGCGCAAGCCTGATGCAGCGACGCCGCGTGCGGGATGAAGG

CCTTCGGGTTGTAAACTCTGTCCTCATCCAAGAGAAGGAAAGGTAGTAACTGACCTTTT

CAGGACGGTAGATGAGGAGGAAGCCCCGGCTAACTATGTG

>7346 len=160 tot-seq=1

TGGGGAATCTCCGCAATGGGCGCAAGCCTGACGGAGCAATGCCGCGTGAGTGAAGAAGG  
CCTTCGGGTTGTAAACTCTGTCCTCATCCAAGAGAAGGGAAGGTAGTAACTGACCTTTC  
TAGGACGGTACCCTGTGAGGAAGCCCCGGCTAACTACGTG

>7347 len=160 tot-seq=1

TGGGGAATCTCCGCAATGGGCGCAAGCCTGACGGAGCAATGCCGCGTGAGTGAAGAAGG  
CCTTCGGGTTGTAAACTCTGTCCTCATCCAAGAGAAGGAAAGGTAGTAACTGACCTTTG  
TTTGACGGTAATCAATTAGAAAAGTCACGGCTAACTACGTG

>7348 len=160 tot-seq=1

TGGGGAATCTCCGCAATGGACGAAAGTCTGACGGAGCAACGCCGCGTGAGTGAAGACGG  
CCTTCGGGTTGTAAAGCTCTGTGATTCGGGACGAAAGGCCATATGTGAATAATATATGGA  
AATGACGGTACCTGCAGAAGAAGCCCCGGCTAACTACGTG

>7349 len=160 tot-seq=1

TAGGGAATTTTCGGCAATGGGGGAAACCCTGACCGAGCAACGCCGCGTGAGTGATGACGG  
CCTTCGGCTCGTAAAGCTCTGTTGTTGGTGAAGAAGGACAGGGGTAGTAACTGACCTTTG  
TTTGACGGTAATCAATTAGAAAAGTCACGGCTAACTACGTG

>7350 len=160 tot-seq=1

TAGGGAATCTCCGCAATGGGCGAAAGCCTGACGGAGCAACGCCGCGTGAGTGAAGACGG  
CCTTCGGGTTGTAAACTCTGTCCTCATCCAAGAGAAGGGAAGGTAGTAACTGACCTTTC  
TAGGACGGTAGATGAGGAGGAAGCCCCGGCTAACTATGTG

>7351 len=160 tot-seq=1

TGGGGAATATTGCACAATGGAGGGAACCTCTGATGCAGCGACGCCGCGTGAACGAAGAAGG  
CTTTCGAGTCGTAAAGCTCTGTTGTTGGTGAAGAAGGACAGGGGTAGTAACTGACCTTTG  
TTTGACGGTAATCAATTAGAAAAGTCACGGCTAACTACGTG

>7352 len=160 tot-seq=1

TAGGGAATCTTCGGCAATGGGGGCAACCCTGACCGAGCAACGCCGCGTGAGTGAAGAAGG  
TTTTCGGATCGTAAACTCTGTTGTTAGAGAAGAACAAGTGCTAAAGTAACTGTTAGCGC  
CTTGACGGTATCTAACCAGAAAGCCACGGCTAACTACGTG

>7353 len=160 tot-seq=1

TGGGGAATCTTCGCAATGGGCGCAAGCCTGACGGAGCAATGCCGCGTGAGTGAAGACGG  
CCTTCGGGTTGTAAACTCTGTCCTTGCCCAAGAGAGAGGATGGTAGTAACTGACCATCC  
TAGGACGGTAGGCAAGGAGGAAGCCCCGGCTAACTATGTG

>7354 len=160 tot-seq=1

GTAAGAATATTCCGCAATGGGGGGAACCCTGACGGAGCGACGCCGCGTGAACGAAGAAGG  
CCGGAAGTTGTAAAGTTCTTTTCTGTCCGAGGAATAAGTGTAGGAGGAAATGCCTGCAT  
GGTGACGGTAGGGCAGGAATAAGCACCGGCTAATTACGTG

>7355 len=160 tot-seq=1

TGGGGAATATTGCACAATGGGCGAAAGTCTGATGGAGCGACGCCGCGTGAATGATGAAGG  
CCGTGAGGTTGTAAAGTTCTTTTCGGGAGGAGGAATGAAGTTATCAGGGAATGGATGACA  
GATGACGAGAATCCCGGAATAAGCCCCGGCTAACTACGTG

>7356 len=160 tot-seq=1

TGGGGAATATTGCACAATGGGCGCAAGCCTGATGCAGCCATGCCGCGTGTATGAAGAAGG  
CCTTCGGGTTGTAAAGTACTTTTCAGTCAGGAGGAAGGTGGTGAGCTTAATACGCTCATCA  
ATTGACGTTACTGACAGAAGAAGCACCGGCTAACTCCGTG

>7357 len=160 tot-seq=1

TGGGGAATATTGCGCAATGGGGGGAACCCTGACGCAGCCATGCCGCGTGAATGAAGAAGG  
CCTTCGGGTTGTAAAGCTCTGTTGTTGGTGAAGAAGGACAGGGGTAGTAACTGACCTTTG  
TTTGACGGTAATCAATTAGAAAGTCACGGCTAACTACGTG

>7358 len=160 tot-seq=1

TAGGGAATCTTCCACAATGGACGCAAGTCTGATGGAGCAACGCCGCGTGAGTGAAGAGGG  
TTTTCGGATCGTAAAGCTCTGTTGTTAGGGAAGAATGATTGTGTAGTAACTATAACACAGT  
AGAGACGGTACCTAACAGAAAGCCACGGCTAACTACGTG

>7359 len=160 tot-seq=1

TGGGGAATCTTGCGCAATGGGCGAAAGCCTGACGCAGCCATGCCGCGTGGATGATGAGGG  
TCTTAGGATTGTAAAGCTCTGTTGTTGGTGAAGAAGGACAGGGGTAGTAACTGACCTTTG  
TTTGACGGTAATCAATTAGAAAGTCACGGCTAACTACGTG

>7360 len=160 tot-seq=1

TAGGGAATCTTCCGCAATGGACGAAAGTCTGACGGAGCAACGCCGCGTGAGTGTGAAGG

TTTTCGGATCGTAAACTCTGTTGTTAGGGAAGAACAAGTAGCATAGTAACTGATGTTAC  
CTTGACGGTACCTAACCAGAAAGCCACGGCTAACTACGTG

>7361 len=160 tot-seq=1

TGGGGAATATTGCGCAATGGGGGAAACCCTGACGCAGCCATGCCGCGTGCAGGATGAAGG  
TCTTCGGATTGTAAACTGCTTTTGTTCAGGGAAGAAAAGGTCTGTGTTAATACCATAGACT  
GCTGACGGTACCTGAAAAATAAGCACCGGCTAACTACGTG

>7362 len=160 tot-seq=1

TGGGGAATATTGGACAATGGGCGCAAGCCTGATCCAGCCATGCCGCGTGTGTGAAGAAGG  
CCTTCGGGTTGTAAAGCACTTTTGTCCGAAAGAAAAGCTTCGGGTTAATAACCCGGAGT  
TATGACGGTACCGGAAGAATAAGCACCGGCTAACTTCGTG

>7363 len=160 tot-seq=1

TGGGGAATTTTGGACAATGGGCGCAAGCCTGATCCAGCAATGCCGCGTGAGTGAAGAAGG  
CCTTCGGGTTGTAAAGCTCTTTTGTTCAGGGAAGAAACGGTGGGAGCTAATATCTCCTACT  
AATGACGGTACCTGAAGAATAAGCACCGGCTAACTACGTG

>7364 len=160 tot-seq=1

TGGGGAATCTTCCGCAATGGACGAAAGTCTGACGGAGCAACGCCGCGTGAGTGAAGACGG  
CCTTCGGGTTGTAAAGCTCTGTGATTCGGGACGAAAGGCCATATGTGAATAATATATGGA  
AATGACGGTACCCAAGGAGGAAGCCACGGCTAACTACGTG

>7365 len=160 tot-seq=1

TGGGGAATATTGCACAATGGGCGCAAGCCTGATGCAGCCATGCCGCGTGATGAAGAAGG  
CCTTCGGGTTGTAAAGTACTTTTCAGCGAGGAGGAAAGGTTGATGCCTAATACGTATCAGC  
TGTGACGTTACTCGCAGAAGAAGCACCGGCTAACTCCGTG

>7366 len=160 tot-seq=1

GTAAGAATATTCCGCAATGGACGGAAGTCTGACGGAGCGACGCCGCGTGCGCGAAGAAGG  
CCGGAAGGTTGTAAAGCGCTTTTTAGGTTGAGGAAGAACAAGTACTGAGAGGAAATGCTTGGTG  
GGTGAAGTACTTGAATAAGCACCGGCTAATTACGTG

>7367 len=160 tot-seq=1

TAGGGAATCTTCCACAATGGGCGCAAGCCTGATGGAGCAACACCGCGTGAGTGAAGAAGG  
GTTTCGGCTCGTAAAGCTCTGTTGTTAAGAAGAACGTGGGTGAGAGTAACTGTTACCC

AGTGACGGTATTTAACCCAGAAAGCCACGGCTAACTACGTG

>7368 len=160 tot-seq=1

TGGGGAATCTCCGCAATGGACGAAAGCTTGATGGAGCGACACAGCGTGCACGATGAAGG

TCTTCGGATTGTAAAGTGCTGTTATAAGGGAAGAACATTTGCAATAGGAAATGATTGCAG

ACTGACGGTACCTTGTTCAGAAAGCGATGGCTAACTATGTG

>7369 len=160 tot-seq=1

TGGGGAATATTGGACAATGGGCGAAAGTCTGACCGAGCAACGCCCGTGAGTGAAGAAGG

TTTTCGGATCGTAAACTCTGTTGTTAGAGAAGAATGGTCGGCAGAGTAACTGTTGCCGG

CGTGACGGTATCCAACCAGAAAGCCACGGCTAACTACGTG

>7370 len=160 tot-seq=1

TCGAGAATTTTTCTCAATGGGGGAAACCCTGAAGGAGCGACGCCCGTGGAGGATGAAGG

TTTTCGGATTGTAAACTCCTGTCATTGGTGAACAAGAACTTGTGGTTAACTGCCATGGGT

TTCGATAGTAGCCGAAGAGGAAGGGACGGCTAACTCTGTG

>7371 len=160 tot-seq=1

TGAGGAATATTGGCCAATGGGCGCAAGCCTGACGGAGCAATGCCCGTGAGTGAAGAAGG

CCTTCGGGTTGTAAACTCTGTCCTCATCCAAGAGAAGGGAAGGTAGTAACTGACCTTTC

CAGGACGGTAGATGAGGAGGAAGCCCCGGCTAACTATGTG

>7372 len=160 tot-seq=1

GGCTCATGTTTCAGTGAATTTTCAGCTGACACCATGCCTTCAGGCCCATGGGATCTTTCT

GTGCCCCAGCGAGGCCCTGCCTGCCTCACCAGATGAGGTGAGCCATCCCTGGTCACCTG

GTGGGATCCAAAATCGGATCTGAAGAGGAGTACTGAGACC

>7373 len=160 tot-seq=1

TGGGGAATTTTGGGCAATGGGCGAAAGCCTGATCCAGCCATGCCCGTGCAGGATGAAGG

CCTTCGGGTTGTAAACTGCTTTTGTACGGAACGAAACGGTCTTTTCTAATACAGAAGGCT

AATGACGGTACCGTAAGAATAAGCACCCGGCTAACTACGTG

>7374 len=160 tot-seq=1

TGGGGAATATTGGACAATGGGGGAAACCCTGATCCAGCGACGCCCGTGTGTGAAGAAGG

CCTGCGGGTTGTAAAGCACTTTTAGTGGGGATGAAAAGTTCAGGGCTAATACCCCTGGAT

CTTGACCTAACCCACAGAAAAAGCACCCGGCTAACTCTGTG



>7375 len=160 tot-seq=1

TGGGGAATCTTGCGCAATGCACGAAAGTGTGACGCAGCAACGCCGCGTGCGGGAAGAAGG  
TCTTCGGATCGTAAACCGCTTTCAGTTGGGACGAGGGTCAGCTGGTGAATAGCCAGTCTG  
ACTGACGGTACCTTCAGAAGAAGCCCCGGCTAACTACGTG

>7376 len=160 tot-seq=1

TGAATGAGGCTGACCCCTCCGTGCCCTCATGGGAGAGACAACCCAAGGACATATCACCAC  
ACAAACCAGCTACAGGCTGGGATCTAACCTGGACTCAGGAGAGCAGCACCAGGAGCCCC  
AGCCTGGCCTGGGGATCAGGGAGGGCTTCCTGGAGGAGGC

>7377 len=160 tot-seq=1

TGGGGAATCTCCGCAATGGACGAAGGTCTGACGGAGCAACGCCGCGTGAGTGAAGACGG  
CCTTCGGATTGTAAAGCTCTGTGATTCGGGACGAAAGGCCATATGTGAATAATATGTGGA  
AATGACGGTACCGGAAAAGCAAGCCACGGCTAACTACGTG

>7378 len=160 tot-seq=1

TGGGGAATCTCCGCAATAGACGAAAGTCTGACGGAGCAACGCCGCGTGAGTGAAGACGG  
CCTTCGGGTTGTAAAGCTCTGTGATTCGGGACGAAAGGCCATATGTGAATAATATATGGA  
AATGACGGTATCATAGGAGGAAGCCCTGGCTAAATACGTG

>7379 len=160 tot-seq=1

TGGGGAATTTTGCACAATGGGGGAAACCTGATGCAGCGACGCCGCGTGATTTAGAAGGC  
CTTCGGGTTGTAAAGCTCTGTTATACGGGACGAACGGCAAGGTGGTAAATAGCCATCATG  
AGTGACGGTACCGTAAGAGAAAAGCCACGGCTAACTACGTG

>7380 len=160 tot-seq=1

TAGGGAATCTTCGGCAATGGACGAAAGTCTGACCGAGCAACGCCGCGTGAGTGAAGAAGG  
TTTTCGGATCGTAAACTCTGTTGTTAGAGAAGAACAAGGACGTTAGTAACTGGCCTTTA  
TTTGACGGTAATCAACCAGAAAAGTCACGGCTAACTACGTG

>7381 len=160 tot-seq=1

TAGGGAATCTCCACAATGGACGCAAGTCTGGTGGAGCAACGCCGCGCGAGTGAAGAAGG  
TTTTCGGATCGTAAAGCTCTGTTGTTGGTAAAGAAGGATAGAGGCAGCAACTGGCCTTTA  
TTTGACGGTAATCAACCAGAAAAGTCACGGCTAACTACGTG

>7382 len=160 tot-seq=1

TGGGGAATATTGGACAATGGAGGGAAGCTGATCCAGCAATTCTGTGTGTGTGAAGAAGG  
TTTTAGGACTGTAAAGTACTTTTCAGCGGGGAGGAAGGCGACAGGGTTAATAACCCCTGTCTG  
ATTGACGTTACCCGCAGAAGAAGCACCCGGCTAACTCCGTG

>7383 len=160 tot-seq=1

TGGGGAATATTGCACAATGGGCGCAAGCCTGATGCAGCCATGCCGCGTGTATGAAGAAGG  
CCTTCGGGTTGTAAAGTACTTTTCAGCGGGGAGGAAGGCGGTGGAGTTAATAGCTTCACCG  
ATTGACGTTACCCGCAGAAGAAGCACCCGGCTAACTCCGTG

>7384 len=160 tot-seq=1

TAGGGAATCTCCGCAATGGGCGAAAGCCTGACGGAGCAACGCCGCGTGAGTGATGAAGG  
TCTTCGGATCGTAAACTCTGTTGTTAGGGAAGAACAATTTGTTAGTAACTGAACAAGT  
CTTGACGGTACCTAACCAGAAAGCCACGGCTAACTACGTG

>7385 len=160 tot-seq=1

TGGGGAATATTGCACAATGGGCGAAAGCCTGATGCAGCGACGCCGCGTGAGTGAAGAAGG  
TTTTCGGATCGTAAACTCTGTTGTTAGAGAAGAACAAGTGCTAGAGTAACTGTTAGCGC  
CTTGACGGTATCTAACCAGAAAGCCACGGCTAACTACGTG

>7386 len=160 tot-seq=1

TGGGGAATATTGCGCAATGGGGGAAACCCTGACGCAGCGACGCCGCGTGCGGGATGAAGG  
CCTTCGGGTTGTAAAGTACTTTTCAGCGGGGAGGAAGGGAGTGAGGTTAATAACCTCATTC  
ATTGACGTTACCCGCAGAAGAAGCACCCGGCTAACTCCGTG

>7387 len=160 tot-seq=1

TAGGGAATCTCCACAATGGACGAAAGTCTGATGGAGCAACGCCGCGTGAGTGATGAAGG  
TTTTCGGATCGTAAACTCTGTTGTAAGGGAAGAACAAGTACGTTAGGAAATGAACGTAC  
CTTGACGGTACCTTATTAGAAAGCCACGGCTAACTACGTG

>7388 len=160 tot-seq=1

TGGGGAATATTGCGCAATGGGGGAAACCCTGACGCAGCGACGCCGCGTGCGGGATGAAGG  
CCTTCGGGTTGTAAAGGACTTTTGTGAGGGAAGAAAAGGCTGTTGCTAATATCGACAGCT  
GATGACGGTACCTGAAGAATAAGCACCCGGCTAACTACGTG

>7389 len=160 tot-seq=1

TGAGGAATATTGGTCAATGGACGAGAGTCTGAACCAGCCAAGTAGCGTGAGTGAAGAAGG

GCTTCGGCTCGTAAACTCTGTTGTTGAAGAAGAACGTGCGTGAGAGTAACTATTCACGC  
AGTGACGGTATTCAACCAGAAAGTCACGGCTAACTACGTG

>7390 len=160 tot-seq=1

TGGGGAATATTGCGCAATGGGGGAAACCCTGACGCAGCGACGCCGCGTGTGTAAAGAAGG  
TCTTCGGATCGTAAAGCACTGTTGTAAGTGAAGAATGCCACATAGAGGAAATGCTATGTG  
GGTGACGGTAGCTTACCAGAAAGCCACGGCTAACTACGTG

>7391 len=160 tot-seq=1

TAGGGAATCTTCGGCAATGGGGGCAACCCTGACCGAGCAACGCCGCGTGAGTGAAGAAGG  
TTTTCGGATCGTAAAGCTCTGTTGTAAGAGAAGAAAGATAGAGGTAGTAACTGGCCTTTA  
CTTGACGGTAATTACTTAGAAAAGTCACGGCTAACTACGTG

>7392 len=160 tot-seq=1

TAGGGAATCTTCGGCAATGGGGGCAAGCCTGATGCAGCCATGCCGCGTGTATGAAGAAGG  
CCTTCGGGTTGTAAAGTACTTTTCAGCGGGGAGGAAGGGAGTGAGGTTAATAACCTCATT  
ATTGACGTTACCCGCAGAAGAAGCACCGGCTAACTCCGTG

>7393 len=160 tot-seq=1

TAGGGAATCTTCGGCAATGGGGGCAACCCTGACCGAGCAACGCCGCGTGTATGAAGAAGG  
CCTTCGGGTTGTAAAGTACTTTTCAGCGGGGAGGAAGGGAGTGAGGTTAATAACCTTATTC  
ATTGACGTTACCCGCAGAAGAAGCACCGGCTAACTCCGTG

>7394 len=160 tot-seq=1

TAGGGAATCTTCCACAATGGACGAAAGTCTGATGGAGCAACGCCGCGTGAGTGAAGAAGG  
GTTTCGGCTCGTAAAGCTCTGTTGGTAGTGTCAAAGTTGGAGGTAGTAACTGGCCTTTC  
TTTGACGGTAATTACTTAGAAAAGTCACGGCTAACTACGTG

>7395 len=160 tot-seq=1

TAGGGAATCTTCCACAATGGACGAAAGTCTGATGGAGCAACGCCGCGTGAGTGAGGAAGG  
GTTTCGGCTCGTAAAGCTCTGTTGGTAGTGAAGAAAGATAGAGGGAGTAACGGGCCTTGA  
TTTGACGGTAATTACTGAGAAAAGTCACGGCTAACTACGTG

>7396 len=160 tot-seq=1

TGGGGAATTTTGGACAATGGGGGCAACCCTGATCCAGCCATGCCGCGTGTATGAAGAAGG  
CCTTAGGGTTGTAAAGTACTTTTGTAGGGAAGAAAAGTCAGCTGTGAATAATGGCTGAT

ACTGACGGTACCTAAAGAATAAGCACCGGCTAACTACGTG

>7397 len=160 tot-seq=1

TGGGGAATTTTGGACAATGGGCGCAAGCCTGATCCAGCCATTCCGCGTGAGTGAAGAAGG  
CCTTCGGGTTGTAAAGCTCTTCGCAAGGGAAGAAAGATTACCCTCTAACATAAGGTAAT  
TATGACGGTACCTTGATAAGAAGCACCGGCTAACTACGTG

>7398 len=160 tot-seq=1

TGGGGAATATTGGACAATGGGCGAAAGCCTGATCGAGCCATGCCGCGTGTGTGAAGAAGG  
TCTTCGGATTGTAAAGCACTTTAAGTTGGGAGGAAGGATAGTAAATTAACCTTTGCTGT  
TTTGACGTTACCGAAAGAATAAGCACCGGCTAACTCTGTG

>7399 len=160 tot-seq=1

TGGGGAATATTGCACAATGGGGGAAACCCTGATGCAGCCATGCCGCGTGTGTGAAGAAGG  
CCTTCGGGTTGTAAAGCACTTTCAGCGAGGAGGAAAGGGTGAAGCTAATACCTTTCATC  
TGTGACGTTACTCGCAGAAGAAGCACCGGCTAACTCCGTG

>7400 len=160 tot-seq=1

TGGGGAATTTTGGACAATGGGCGCAAGCCTGATCCAGCAATGCCGCGTGGGTGAAGAAGG  
CCTTCGGGTTGTAAAGCTCTTTTGTGAGGGAAGAAACGGGAGAAGCTAATATCTTTTCCT  
AATGACGGTACCTGAAGAATAAGCACCGGCTAGCTACGTG

>7401 len=161 tot-seq=1

GGTTGACAGATGGGGATAGGAGAGCGAGAGGCACTGTTTTTCATGGGGGATCAGATTGTTT  
AATGAGAGGGAAACACCTGAGGAAAAATGTTGAGGAAAGATGTTGGGAGAGGTGAAGGCA  
GAAAGGCTTCCTTCAATCATATGCCACCTTGTGTCTCCTTC

>7402 len=161 tot-seq=1

TTAGGGATATTCGTCAATGGGGGAAACCCTGAACGAGCAATGCCGCGTGAAGGAAGAAGG  
TCCTATGGATTGTAAACTTCTGTTGTAAGGGAAGAAAGAGTAGAAGAGGAAATGCTTCTA  
AAGTGACAGTACCTTACGAGAAAGCTCCGGCTAACTACGTG

>7403 len=161 tot-seq=1

TGGGGAATATTGGACAATGGGCGAAAGCCTGATCCAGCCATGCCGCGTGTGTGAAGAAGG  
CCTTCGGGTTGTAAAGCTCTGTTAATCGGGACGAAAGGCCTTCTTGCGAATAGTTAGAAG  
GATTGACGGTACCGGAATAGAAAGCCACGGCTAACTACGTG

>7404 len=161 tot-seq=1

TCTCAGTACAGAACACCTGGTGGGCACATCTGATGGGCTGAGTCTGAAAACATGCAGTC  
TTGCTGCTGATCAGGCAGCTTTGCAAGTTAGAGAACAGAGAGGTGGTGGGGGGACCTTGT  
GGGTGAGGAAGGCCTGTCTTCAGTAATGGGAGCAGTTAGGG

>7405 len=161 tot-seq=1

CTTCTTCATGGAAGGGGTGTCACATGCAACCAGGGAATGATGACTTGTCCCCTTTAAGTC  
CTGCCACTATTCCAGTAGTGGGACATCTTGCCCTGCTTGGTTGCTGTTGCAGTTTGTGCAA  
TTCATAGTTAGCTGGGATAGACCACTGATGCTGTTTCTCCT

>7406 len=161 tot-seq=1

TGGGGAATATTGGACAATGGGGGGAACCCTGATCCAGCCATGCCGCGTGTGTGAAGAAGG  
CCTTCGGGTTGTAAAGCACTTTAATTTGGGAGGAAGGGCTTACGGTTAATAACCGCTAAG  
TTTTGACGTTACAAAAGAATAAGCACCGGCTAACTTCGTG

>7407 len=161 tot-seq=1

TGGGGAATATTGGGCAATGGAGGAACTCTGACCCAGCAACGCCGCGTGGAGGAAGAAGG  
TTTTCGGATCGTAAAGCTCTGTTGTAAGAGAAGAACGAGTGTGAGAGTGGAAAGTTCACA  
CTGTGACGGTATCTTACCAGAAAGGGACGGCTAACTACGTG

>7408 len=161 tot-seq=1

TGGGGAATCTCCGCAATGGGCGCAAGCCTGACGGAGCAACGCCGCGTGAGTGAAGAAGG  
GTTTCGACTCGTAAAGCTCTGTTGTCGGGACGAACGTAGAGGTCATGAACAATGACTTC  
TAATGACGGTACCTGACGAGGAAGCCACGGCTAACTACGTG

>7409 len=161 tot-seq=1

TAGGGAATCTCCGCAATGGGCGAAAGCCTGACGGAGCAACGCCGCGTGAGTGATGAAGG  
TCTTCGGATCGTAAAGCTCTGTTAATCGGGACGAATGGTCGGTGTGCAAATAGTGCATGG  
ACATGACGGTACCGGAATAGAAAGCCACGGCTAACTACGTG

>7410 len=161 tot-seq=1

TGGGGAATATTGCACAATGGGGGAAACCCTGATGCAGCGACGCCGCGTGGAGGAAGAAGG  
TCTTCGGATCGTAAAGCCCTGTTGTTAAGGAAGAACGAGTGTGAGAATGGAAAGTTCATA  
CTATGACGGTACTTAACCAGAAAGGGACGGCTAACTACGTG

>7411 len=161 tot-seq=1

AAGGCTTAGAAGTACCCAGCCTTTGAGGAAGCCAAAGCATTTTAAAATTA AACCTGAGG  
ATATCTGTAGGGGATTGGATCTACTCTTAGTTGGAATCTGCATGTCCAGACACTGAAGG  
TCCTCCTTGCTGTGGTTTTTTGATCTATCAATAAAGGTA

>7412 len=161 tot-seq=1

TAGGGAATCTTCGGCAATGGGGGCAACCCTGACCGAGCAACGCCGCGTGAGTGATGACGG  
CCTTCGGGTTGTAAAGCTCTGTTAATCGGGACGAAAGGTCTCTTGCGAATAGTTAGAGG  
AATTGACGGTACCGGAATAGAAAGCCACGGCTAACTACGTG

>7413 len=161 tot-seq=1

TGAGGAATATTGGTCAATGGGCGCAGGCCTGAACCAGCCAAGTAGCGTGAGTGAAGAAGG  
TTTTCGGATCGTAAAGCTCTGTTGTAAGTCAAGAACGAGTGTGAGAGTGAAAAGTTCACA  
CTGTGACGGTAGCTTACCAGAAAGGGACGGCTAACTACGTG

>7414 len=161 tot-seq=1

TGGGGAATATTGCACAATGGGGGAAACCCTGATGCAGCGACGCCGCGTGAGCGAAGACGG  
CCTTCGGGTTGTAAAGCTCTGTTAATCGGGACGAAAGGTCTCTTGCGAATAGTTAGAGG  
AATTGACGGTACCGGAATAGAAAGCCACGGCTAACTACGTG

>7415 len=161 tot-seq=1

TGAGGTACTAAGCTTGCAGCTCGAATGCTTTATGACTACTACCTCATCTCTAATATCTTA  
TCTGGGAAGTGGTTGTGCTGTCCCTAAAAAATTCTGCATAAACCTAGAGAAGTTTGTG  
CATTAAACAGGTTTGTGTGTGCCAGGGTATTTTATATAAT

>7416 len=161 tot-seq=1

TGGGGAATCTTGGACAATGGGCGAAAGCCCGATCCAGCAATATCGCGTGAGTGAAGAAGG  
GCAATGCCGCTTGTAAAGCTCTTCGGTATTGAGGAAGGTTGATGTGTTAATAGCACATC  
AAATTGACGTTAAATACAGAAGAAGCACCGGCTAACTCCGT

>7417 len=161 tot-seq=1

TGGGGAATATTGCGCAATGGGGGCAACCCTGACGCAGCCATGCCGCGTGAATGAAGAAGG  
TTTTCGGATCGTAAAGCTCTGTTGTAAGTCAAGAACGAGTGTGAGAGTGAAAAGTTCACA  
CTGTGACGGTAGCTTACCAGAAAGGGACGGCTAACTACGTG

>7418 len=161 tot-seq=1

TGGGGAATTGTTGCAATGGGCGCAAGCCTGACGACGCAACGCCGCGTGGAGGATGAAGG

TCTTCGGATTGTAAACTCCTGTTGATCGGGACGAACAACCACCGGGATAACACCCCGGAG  
GTCTGACGGTACCGATTGAGGAAGCCCCGGCTAACTCTGTG

>7419 len=161 tot-seq=1

TGGGGAATATTGCACAATGGGCGCAAGCCTGATGCAGCAACGCCGCGTGAACGATGACGG  
CCTTCGGGTTGTAAAGTTCTGTTATATGGGACGAACAGGGCATCGGTTAATACCCGGTGT  
CTTTGACGGTACCGTAAGAGAAAGCCACGGCTAACTACGTG

>7420 len=161 tot-seq=1

TGGGGAATCTTCGCAATGGGCGCAAGCCTGACGGAGCAACGCCGCGTGAGTGAAGAAGG  
GTTTCGACTCGTAAAGCTCTGTTGTCGGGGACGAATGTGGAGATGGTGAATAACCATTTT  
CAATGACGGTACCTGACGAGGAAGCCACGGCTAACTACGTG

>7421 len=161 tot-seq=1

TGAGGAATTTTTACAATGGACGAAAGTCTGATGGAGCAACGCCGCGTGAGTGAAGAAAG  
TTTTCGGATCGTAAAGCTCTGTTGTAAGAGAAGAACGAGTGTGAGAGTGGAAAGTTCACA  
CTGTGACGGTATCTTACCAGAAAGGGACGGCTAACTACGTG

>7422 len=161 tot-seq=1

TTAGGAATATTCGTCAATGGGGGAAACCCTGAACGAGCAATGCCGCGTGAGTGATGAAGG  
TCCTTTGGATTGTAAAACCTCTGTTGTTAAGGAAAAATGATAAGAATAGGAAATGATTCTT  
ATTTGATGGTACTTTTTCAAGAAAGCCACGGCTAACTACGTG

>7423 len=161 tot-seq=1

TAGGGAATCTTCCACAATGGGCGAAAGCCTGATGGAGCAACGCCGCGTGGGTGAAGAAGG  
TCTTCGGATCGTAAAGCTCTGCTGTAAGAGAAGAACGTGTGTGAGAGTGGAAAGTTCACA  
CAGTGACGGTAACTTACCAGAAAGGGACGGCTAACTACGTG

>7424 len=161 tot-seq=1

TAGGGAATCTTCGGCAATGGGGGCAACCCTGACCGAGCAACGCCGCGTGAGTGAAGAAGG  
TTTTCGGATCGTAAAGCTCTGTTGTAAGAGAAGAACGTGTGTGAGAGTGGAAAGTTCACA  
CAGTGACGGTATTCAACCAGAAAGTCACGGCTAACTACGTG

>7425 len=161 tot-seq=1

TAGGGAATATTGCGCAATGGGGGAAACCCTGACGCAGCAACGCCGCGTGAGTGAGGAAGG  
TCTTCGGATTGTAAAACCTTTTTATTAGGGAAAAATGTCTAGGTGGCTAATATCCATCTA

GAGTGATGGTACCTAAGGAATAAGCACCGGCTAACTTCGTG

>7426 len=161 tot-seq=1

TAGGGAATCTTCGGCAATGGGGGCAACCCTGACCGAGCAACGCCGCGTGAGTGAAGAAGG

TTTTCGGATCGTAAAGCTCTGTTGTAAGAGAAGAACGTGTGTGAGAGTGGAAAGTTCACA

CAGTGACGGTACCTGCAGAAGAAGCCCCGGCTAACTACGTG

>7427 len=161 tot-seq=1

TAGGGGATCTTCGCAATGGGCGAAAGCCTGACGGAGCAACGCCGCGTGAGTGAAGAAGG

ATTTTCGGTTCGTAAAGCTCTGTTGTTAGGGAAGAACGTTGGTAGGAGTGGAAAATCTACC

AAGTGACGGTAACTAACCAGAAAGGGACGGCTAACTACGTG

>7428 len=161 tot-seq=1

TGGGGGATCTTCGCAATGGACGAAAGTCTGACGGAACAACGCCGCGTGAGTGATGACGG

TCTTCGGATTGTAAAGCTCTGTTAATCGGGACGAATGGTCGGTGTGCAAATAGTGCATGG

ACATGACGGTAACTAACCAGAAAGGGACGGCTAACTACGTG

>7429 len=161 tot-seq=1

TAGGGAATCTTCGGCAATGGACGGAAGTCTGACCGAGCAACGCCGCGTGAGTGAAGAAGG

TTTTCGGACCGTAAAGCTCTGTTGTAAGAGAAGAACGAGTATGAGAGTGGAAAATTCATA

CTGTGACGGCATCTTACCAGAAAGGGACGGCTAACTACGTG

>7430 len=161 tot-seq=1

TAGGGAGTTTTTCGGCAATGGGCGAAAGCCTGACCGAGCAACGCCGCGTGAGTGATGAAGG

TCTTCGGATCGTAAAGCTCTGTTGTTAGAGAAGAACGTTGGTAGGAGTGGAAAATCTACC

AAGTGACGGTAACTAACCAGAAAGGGACGGCTAACTACGTG

>7431 len=161 tot-seq=1

AGGATGAGATGGATGGCATCACTGACTCAAGGGATGTGAATTTGAGCAAATTCTAGGACA

TGGTGAAGGACAGGGAAGCCTGGTGTGCTGCAGTCCATGGGTCGCAGAGTTGGACACGAC

TTAGCGCCTGAACAACCAGGGGAGGAGAGCAGAGTAAAAGA

>7432 len=161 tot-seq=1

TGAGGAATTTTTACAATGGACGAAAGTCTGATGGAGCAATACCACGTGAACGATGAAGG

TCTTCGGATCGTAAAGCTCTGTTGTTAAGGAAGAACGAGTGTGAGAATGGAAAGTTCATG

CTGTGACGGTACTTAACCAGAAAGGGACGGCTAACTACGTG



>7433 len=161 tot-seq=1

TAGGGAATTTTTACAATGGGCGCAAGCCTTATGAAGCAATGCCGCGTGAACGATGAAGG  
TCTTATAGATCGTAAAGTGCTGTTATAAGGGAAGAACATTTGCAATAGGAAATGATTGCA  
GACTGACGGTACCTTGTCAGAAAGCGATGGCTAACTATGTG

>7434 len=161 tot-seq=1

TAGGGAATTTTTACAATGGGCGCAAGCCTTATGAAGCAATGCCGCGTGAACGATGAAGG  
TCTTATAGATTGTAAAGTTCTTTTATATGGGAAGAAACGCTAAAATAGGAAATGATTTTA  
GTTTGACGGTACCTTGTCAGAAAGCGATGGCTAACTATGTG

>7435 len=161 tot-seq=1

TGGGGAATCTCCGCAATGGACGAAAGTCTGACGGAGCAACGCCGCGTGAGTGATGACGG  
TCTTCGGATTGTAAACTCTGTCATACGGGACGAAAAAGGCGGATGCCAACAGTATCCGT  
CCGTGACGGTACCGTAAGAGAAAGCCACGGCTAACTACGTG

>7436 len=161 tot-seq=1

TAGGGAATCTCCGCAATGGACGAAAGTCTGACGGAGCAACGCCGCGTGAGTGAAGAAGG  
ATTCGGTTCGTAAACTCTGTTATACGGGACGAAAAAGGCGGATGCCAACAGTATCCGT  
CCGTGACGGTACCGTAAGAGAAAGCCACGGCTAACTACGTG

>7437 len=161 tot-seq=1

TGGGGAATATTGGACAATGGAGGAAACTCTGATCCAGCAATTCTGTGTGTGTGAAGAAGG  
TTTTAGGACTGTAAAGCTCTGTTAATCGGGACGAATGGTCGGTGTGCAAATAGTGCATGG  
ACATGACGGTACCGGAATAGAAAGCCACGGCTAACTACGTG

>7438 len=161 tot-seq=1

TAGGGAATTTTCGGCAATGGGCGAAAGCCTGACCGAGCAACGCCGCGTGAGTGATGACGG  
CCTTCGGGTTGTAAAGCTCTGTTATACGGGACGAAGAAGACGGATGCCAACAGTATCCGT  
CCGTGACGGTACCGTAAGAGAAAGCCACGGCTAACTACGTG

>7439 len=161 tot-seq=1

TGGGGAATATTGCACAATGGGGGAAACCCTGACCGAGCAACGCCGCGTGAGTGAAGAAGG  
TTTTCGGATCGTAAACTCTGTTGTTAGAGAAGAACAAGGATGAGAGTAGAATGTTTCATC  
CCTTGACGGTATCTAACCAGAAAGCCACGGCTAACTACGTG

>7440 len=161 tot-seq=1

TGGGGAATATTGGACAATGGAGGCAACTCTGATCCAGCAATTCTGTGTGTGTGAAGACGG  
TCTTCGGATTGTAAAGCTCTGTTATACGGGACGAACGGCAAGGTGGTAAATAGCCATCAT  
GAGTGACGGTACCCTAAGAGAAAGCCACGGCTAACTACGTG

>7441 len=161 tot-seq=1

TAGGGAATATTGCACAATGGGCGAAAGCCTGATGCAGCAACGCCGCGTGAGTGAAGAAGG  
CCCTTGGGTCGTAAAGCTCTTTAGCCTGGAAAGAAGTGTCCATGAGTGAATAATTCATGG  
ATGTGACGGTACCAGGAGAATAAGGTCCGGCTAATTCGTG

>7442 len=161 tot-seq=1

TAGGGAATCTCCACAATGGACGCAAGTCTGATGGAGCAACGCCGCGTGAGTGAAGAAGG  
CCTTTGGTTGTAAAGCACTTTAAGCGAGGAGGAGGCTACTTAGATTAATACTCTAGGAT  
AGTGGACGTTACTCGCAGAATAAGCACCGGCTAACTCTGTG

>7443 len=161 tot-seq=1

TAGGGAATCTTCGCAATGGACGGGAGTCTGACCGAGCAACGCCGCGTGAGTGAAGAAGG  
TTTTCGGGTCGTAAAGCTCTGTTGTTAAGGAAGAACGAGTGTGAGAATGGAAAGTTCATG  
CTGTGACGGTACTTAACCAGAAAGGGACGGCTAACTACATG

>7444 len=161 tot-seq=1

TAGGGAATCTCCACATTGGGCGAAAGCCTGATGGAGCAACGCCGCGTGGGTGAAGAAGG  
TCTTCGGATCGTAAAGCTCTGTTGTTAAGGAAGAACGAGTGTGAGAATTGAAAGTTCATG  
CTGTGACGGTACTTAACCAGAAAGGGACGGCTAACTACGTG

>7445 len=161 tot-seq=1

TGGGGAATCTCCGCAATGGACGAAAGTCTGACGGAGCAACGCCGCGTGAGTGAAGAAGG  
TCTTCGGATCGTAAAACCCCGTTGTTAGAGAAGAACGTTGGTAGGAGTGGAAAATCTACC  
AAGTGACGGTAACTAACCAGAAAGGGACGGCTAACTACGTG

>7446 len=161 tot-seq=1

TAGGGAATCTCCACAATGGGCGAAAGCCTGACCGAGCAACGCCGCGTGAGTGAAGAAGG  
TTTTCGGATCGTAAAGCTCTGTTGTTAGAGAAGAACGTTGGTAGGAGTGGAAAATCTACC  
AAGTGACGGTAACTAACCAGAAAGCCACGGCTAACTACGTG

>7447 len=161 tot-seq=1

TGGGGAATCTCCGCAATGGACGAAAGTCTGACGGAGCAACGCCGCGTGAGTGAAGACGG

CCTTCGGGTTGTAAAGCTCTGTGATCCGGGACGAAAGAGCCTGAGGTTAATAGCCTAAGG  
AAGTGACGTTACCTCAGAAGAAGCACCGGCTAACTCCGTG

>7448 len=161 tot-seq=1

TGGGGAATCTTCCACAATGGGCGCAAGCCTGATGGAGCAACACCGCGTGAGTGAAGAAGG  
TTTTCGGATCGTAAAGCTCTGTTGTTAGAGAAGAACGTTGGTAGGAGTGGAAAATCTACC  
AAGTGACGGTAACTAACCAGAAAGTCACGGCTAACTACGTG

>7449 len=161 tot-seq=1

TAGGGAATATTGCACAATGGAGGAACTCTGATGCAGCCATGCCGCGTGTGTGAAGAAGG  
CCTTCGGGTTGTAAAGCTCTGTTAATCGGGACGAATGGTTTGTGTGCAAATAGTGCATAG  
ACATGACGGTACCGGAATAGAAAGCCACGGCTAACTACGTG

>7450 len=161 tot-seq=1

TGGGGAATCTTCCGCAATGGGCGAAAGCCTGACGGAGCAACGCCGCGTGAGTGATGACGG  
CCTTCGGGTTGTAAAGCTCTGTGATCGGGGACGAACGGTCATTGGACGAATACTCCAGTG  
AAGTGACGGTACCCGAATAGCAAGCCACGGCTAACTACGTG

>7451 len=161 tot-seq=1

TAGGGAATCTTCCGCAATGGACGGAAGTCTGACCGAGCAACGCCGCGTGAGTGAAGAAGG  
TTTTCGGATCGTAAAGCTCTGTTGTAGGAGAAGAACGTGTGTGAGAGTGGAAAGTCCACA  
CAGTGACGGTAACTTACCAGAAAGGGACGGCTAACTACGTG

>7452 len=161 tot-seq=1

TGGGGAATCTTCCGCAATGGACGGAAGTCTGACGGAACAACGCCGCGTGAGTGAAGACGG  
CCTTCGGGTTGTAAAGCTCAGTGATCCGGGACGAAAGAGCCTGAGGTTAATAGCCTAAGG  
AAGTGACGGTACCGGAAAAGCAAGCCACGGCTAACTACGTG

>7453 len=161 tot-seq=1

TGGGGAATCTTCCGCAATGGACGAAAGTCTGACGGAGCAACGCCGCGTGAGTGAAGACGG  
CCTTCGGGTTGTAAAGCTCTGTGATCCGGGACGAAAGAGCCTGAGGCTAATAGCCTAAGG  
AGGTGACGGTACCGGAAAAGCAAGCCACGGCTAACTACATG

>7454 len=161 tot-seq=1

TAGGGAATCTTCCGCAATGGACGAAAGTCTGACGGAGCAACGCCGCGTGAGTGAGGAAGG  
CCTTCGGGTCGTAAAGCTCTGTTGTGAGGGAAGAAGCGGTGCCGTTCAATAGGGCGGTA

CCTTGACGGTACCTCACCAGAAAGCCACGGCTAACTACGTG

>7455 len=161 tot-seq=1

TTAGGGATCTTCGTCAATGAGGGAAACCTGAACGAGCAATGCCGCGTGAATGATGACGG  
TCATTATGATTGTAATAATTCTGTTGTTAGGGATGAATTGTATATATAGGAAATGATATAT  
GCTTGACAGTACCTTTCCAGAAAGCTCCGGCTAACTACGTG

>7456 len=161 tot-seq=1

TTAGGAATATTCGACAATGGGGGAAACCCTGATCGAGCAATGCCGCGTGAGTGATGAAGG  
TCTTTATGATTGTAATAACTCTGTTGTTAAGGAAGAATAGTCTAAATAGGTAATGATTTAG  
ATCTGACGGTACTTTTCAAGAAAGCTCCGGCTAACTACGTG

>7457 len=161 tot-seq=1

TGAGGAATTTTTCAACAATAGACGAAAGTCTGACGGAGCAACGCCGCGTGAGTGAAGAAGG  
TCTTCGGATTGTAATAACTCTGTTATACGGGACGAAAAGACGGATGCCAACAGTATCCGT  
CCGTGACGGTACCGTAAGAGAAAGCCACGGCTAACTACGTG

>7458 len=161 tot-seq=1

TGAGGAATATTGGTCAATGGACGCAAGTCTGACGGAGCAACGCCGCGTGAGTGAAGAAGG  
ATTCGGTTCGTAAACTCTGTTGTTAAGGAAGAACGAGTGTGAGAATGGAAAGTTCATG  
CTGTGACGGTACTTAACCAGAAAGGGACGGCTAACTACGTG

>7459 len=161 tot-seq=1

TGGGGAATCTCCGCAATGGACGAAAGTCTGACGGAGCAACGCCGCGTGAGTGATGACGG  
TCTTATAGATTGTAAGTTCTTTTATATGGGAAGAAACGCTAAGATAGGAAATGATTTTA  
GTTTACTGTACCATTGAATAAGTATCGGCTAACTATGTG

>7460 len=161 tot-seq=1

TGGGGAATATTGCGCAATGGGGGAAACCCTGACGGAGCAACGCCGCGTGAGTGAAGAAGG  
CCTTCGGGTTGTAAAGCTCTGTTATTCGGGAAGAAAGATTCGTTTGTGAACAATGAACGG  
AAGTGACGGTACCGAAAGAGAAAGCCACGGCTAACTACGTG

>7461 len=161 tot-seq=1

TGGGGAATTTTGGACAATGGGGGCAACCCTGATCCAGCCATGCCGCGTGCAGGATGAAGG  
CCTTCGGGTTGTAAAGCTCTGTTAATCGGGACGAATGATCCTTGTGTGAATAATGCAAGG  
ATTTGACGGTACCGGAATAGAAAGCCACGGCTAACTACGTG

>7462 len=161 tot-seq=1

TGGGGAATATTGCACAATGGGGGAAACCCTGATGGAGCAACGCCGCGTGAGTGATGACGG  
CCTTCGGGTTGTAAAGCTCTGTTAATCGGGACGAATGGTCCTTGTGTGAATAATGCAAGG  
ATTTGACGGTACCGGAATAGAAAGCCACGGCTAACTACGTG

>7463 len=161 tot-seq=1

TGGGGAATATTGCACAATGGGCGCAAGCCTGATGCAGCGACGCCGCGTGAGGGATGGAGG  
CCTTCGGGTTGTAAAGCTCTGTTATTCGGGAGGAAAGATTCGTTTGTGAATAATGAACGG  
AAGTGACGGTACCGAAAGAGAAAGCCACGGCTAACTACGTG

>7464 len=161 tot-seq=1

TGGGGAATATTGCACAATGGGCGCAAGCCTGATGCAGCGACGCCGCGTGAGGGATGGAGG  
CCTTCGGGTTGTAAAGCTCTGTTAATCGGGACGAATGGTCCTTGTGTGAATAATGCAAGG  
ATTTGACGGTACCGGAATAGAAAGCCACGGCTAACTACGTG

>7465 len=161 tot-seq=1

TGGGGAATATTGGGCAATGGGCGCAAGCCTGACCCAGCAACGCCGCGTGAGTGATGACGG  
CCTTCGGGTTGTAAAGCTCTGTTAATCGGGACGAATGGTCCTTGTGTGAATAATGCAAGG  
ATTTGACGGTACCGGAATAGAAAGCCACGGCTAACTACGTG

>7466 len=161 tot-seq=1

TGGGGAATTTCCGCAGTGGACGAAAGTCTGACGGAGCAACGCCGCGTGAGTGATGACGG  
CCTTCGGGTTGTAAAGCTCTGTTAATCGGGACGAATGGTCCTTGTGTGAATAATGCAAGG  
ATTTGACGGTACCGGAATAGAAAGCCACGGCTAACTACATG

>7467 len=161 tot-seq=1

TAGGGAATATTCCACAATGAGCGAAAGCTTGATGGAGCGACACAGCGTGCACGATGAAGG  
TCTTCGGATCGTAAAGCTCTGTTGTAAGAGAAGAACGTGTGTGAGAGTGGAAGTTCACA  
CAGTGACGGTAACTTACCAGAAAGGGACGGCTAACTACGTG

>7468 len=161 tot-seq=1

TGGGGAATCTCCGCAATGGACGAAAGTCTGACGGAGCAACGCCGCGTGAGTGGTGACGG  
CCTTCGGGTTGTAAAGCTCTGTTAATCGGGGAGGAAGGGAGTAAAGTTAATACCTTTGCT  
CATTGACGTTACCCGAGAAAGAAGCACCGGCTAACTCCATG

>7469 len=161 tot-seq=1

TAGGGAATCTTCGGCAATGGGGGCAACCCTGACCGAGCAACGCCGCGTGAGTGATGACGG  
CCTTCGGGTTGTAAAGCTCTGTTAATCGGGACGAATGGTCCTTGTGTGAATAATGCAAGG  
ATTTGACGGTACCGGAATAGAAAGCCACGGCTAACTACGTG

>7470 len=161 tot-seq=1

TAGGGAATCTTCCACAATGGACGAAAGTCTGATGAAGCAATGCCGCGTGTGTGAAGAAGG  
CCTTATGGTTGTAAAGCACTTTAAGCGAGGAGGAGGCTACTGAGACTAATACTCTTGAC  
AGTGGACGTTACTCGCAGAATAAGCACCGGCTAACTCTGTG

>7471 len=161 tot-seq=1

TGGGGAATCTTCGCAATGGGCGCAAGCCTGACGGAGCAATGCCGCGTGAGTGAAGAAGG  
TTTTCGGATCGTAAAGCTCTGTTGTAAGAGAAGAACGTGTGTGAGAGTGGAAGTTCACA  
CAGTGACGGTAACTTACCAGAAAGGGACGGCTAACTACGTG

>7472 len=161 tot-seq=1

TTAGGAATATTCGTCAATGGGGGAAACCCTGAACGAGCAATGCCGCGTGAGTGATGAAGG  
TCTTAATGATTGTAAACTCTGTTGTGAAGGAAGAATAGCCATCATAGGTAATGATGATG  
GTGTGACGGTACTTCACCAGAAAGCCCCGGCTAACTACATG

>7473 len=161 tot-seq=1

TTAGGAATATTCGTCAATGGGGGAAACCCTGAACGAGCAATGCCGCGTGAAGGATGACGG  
TCCTATGGATTGTAAACTTCTGTTGTTAGGGAAGAACGACCTGTGTAGGAAATGAAACAG  
GAGTGACGGTACCTTTCAAGAAAGCTCCGGCTAACTACGTG

>7474 len=161 tot-seq=1

TAGGGAATCTTCGCAATGGACGAAAGTCTGACGGAGCAACGCCGCGTGAGCGAAGAAGG  
TCTTCGGATTGTAAAGCCCTGTTGTCAGGGAAGAACAAGTACCGTTCGAATAGGACGGTA  
CCTTGACGGTACCTGACCAGAAAGCCACGGCTAACTACGTG

>7475 len=161 tot-seq=1

TGGGGAATTTTTCGCAATGGGGGAAACCCTGACGAAGCAACGCCGCGTGGAGGATGAAGG  
CCTTCGGGTCGTAAACTCCTGTCGACCGGGACGAACGCTATTGGGCCCAATACGCCCGAT  
AGTCGACTGTACCGGTGGAGGAAGCCACGGCTAACTCTGTG

>7476 len=161 tot-seq=1

CTAAGAATATTCGCAATGGGCGAAAGCCTGACGGAGCGACGCCGCGTGGACGATGAAGG

CCGGAAGGTTGTAAAGTCCTTTTATGACAGAGGAATAATGAAAGGAGTGGAAGCCTTTC  
AGATGACTGTAGGTCATGAATAAGCACCGGCTAATTACGTG

>7477 len=161 tot-seq=1

TAGGGAATCTTCCACAATGGACGCAAGTCTGATGGAGCAACGCCGCGTGAGTGAAGAAGG  
TTTTCGGATCGTAAAGCTCTGTTGTTAGAGAAGAACAAGTACCGTTTGAATAAGGCGGTA  
CCTTGACGGTACCTAACGAGAAAGCCCCGGCTAACTACGTG

>7478 len=161 tot-seq=1

TAGGGAATCTTCGGCAATGGACGAAAGTCTGACCGAGCAACGCCGCGTGAGTGAAGAAGG  
TTTTCGGATCGTAAACTCTGTTGTTAGAGAAGAATGTTGATTAGAGTGGAAAATTAATC  
AAGTGACGGTATCTAACCGAAAGGGACGGCTAACTACGTG

>7479 len=161 tot-seq=1

CCGACAGACACCTCGTACAGGAGAGCTCTGGCTGGCATCTGGCGGGTGCCCTCTGGGAT  
GAAGCTTCCAGAGGAAGGAACAGGCAGCAATCTTTGCTGTTCTGCAGTCTCTGCTGGTGA  
TACCCAGGTAAACAGGGTCTGGAGTAGACCCCGCAAACT

>7480 len=161 tot-seq=1

TGGGGAATCTTCCGCAATGGGCGCAAGCCTGACGGAGCAACGCCGCGTGAGTGAAGAAGG  
TCTTCGGATCGTAAAGCTCTGTTGACGGGGACGAACGTGCGAAGGGTGAATAATCCTTTG  
CAATGACGGTACCTGTGAGGAAGCCACGGCTAACTACGTG

>7481 len=161 tot-seq=1

TAGGGAATCTTCGGCAATGGACGGAAGTCTGACCGATCAACGCCGCGTGAGTGAAGAAGG  
TTTTCGGATCGTAAAGCTCTGTTGTAAGAGAAGAACGAGTGTGAGAGTGGAAAGTTCACA  
CTGTGACGGTACCTGCAGAAGAAGCCCCGGCTAACTACGTG

>7482 len=161 tot-seq=1

TGGGGAATATTGCGCAATGGGGGAAACCCTGACGGAGCAACGCCGCGTGAGTGATGAAGG  
TCTTCGGATTGTAAAGCTCTGTTAATCGGGACGAAAGAGTTCTGTGTGAATAATGCAGAA  
AAGTGACGGTACCGGAATAGAAAGCCACGGCTAACTCCGTG

>7483 len=161 tot-seq=1

CATCAGAGCGGTGATTCGTTAGAGTCCAGCGCGAGGGCTTTGTCGATCATTGCGCGAGT  
CTGGGCGGTCATATGCTGGCTGGCCTGGTAATAAAGCACCGTCGCCAGCGCCGCATACAG

TTCAGCGTTCTCACCACGTAGTTGCAACGCCTGACGGTACG

>7484 len=161 tot-seq=1

TGGGGAATATTGCACAATGGGCGCAAGCCTGATGCAGCCATGCCGCGTGTATGAAGAAGG  
CCTTCGGGTTGTAAACCGCTTTTGATTGGGGAGGAAGGGAGTAAAGTTAATACCTTTGCT  
CATTGACGTTACCCGCAGAAGAAGCACCGGCTAACTCCGTG

>7485 len=161 tot-seq=1

TGGGGAATTTTGGACAATGGGGGAAACCCTGATCCAGCCATGCCGCGTGCGGGATGAAGG  
CCTTCGGGTTGTAAAGCTCTGTTATACGGGACGAAAAGACGGATGCCAACAGTATCCGT  
CCGTGACGGTACCGTAAGAGAAAGCCACGGCTAACTACGTG

>7486 len=161 tot-seq=1

TAGGGAATCTTCCACAATGGACGCAAGTCTGATGGAGCGACGCCGCGTGAGTGAAGAAGG  
GTTTCGGCTCGTAAAGCTCTGTTGTTGGTGAAGAACGTTGGTAGGAGTGGAATCTACC  
AAGTGAAGTAACTAACCAGAAAGGGACGGCTAACTACGTG

>7487 len=161 tot-seq=1

TGAGGAATATTGGTCAATGGGCGAAAGCCTGATGCAGCGACGCCGCGTGAGTGAAGAAGG  
TCTTCGGATTGTAAAGCTCTGTTATACGGGACGAAAAGACGGATGCCAACAGTATCCGT  
CCGTGACGGTACCGTAAGAGAAAGCCACGGCTAACTACGTG

>7488 len=161 tot-seq=1

TAGGGAATCTTCCGCAATGGACGAAAGTCTGACGGAGCAACGCCGCGTGAACGATGAAGG  
TTTTCGGATCGTAAAGTTCTGTTGTTAGGGAAGAACACGTACCGTTTGAATAGGGCGGTA  
TCTTGACGGTACCTAACGAGAAAGCCCCGGCTAACTACGTG

>7489 len=161 tot-seq=1

TTAGGAATATTCGGCAATGGGGGAAACCCTGACCGAGCAATGCCGCGTGTGAGATGAAGG  
TCCTTCGGATTGTAAATCACTTTTATTTGGGAAGAACTGTAAGCAGAGGAAATGATGCTT  
ACTTGACGGTACCTTTTGAATAAGCCCCGGCTAACTACGTG

>7490 len=161 tot-seq=1

TAGGGAGTTTTCGGCAATGGGGGAAACCCTGACCGAGCAACACCGCGTGAGTGATGAAGG  
TCTTCGGATTGTAAACTCTGTTGTGTGGAAAAAATGACAGGTAGAGTGGAAGCTACTT  
GTTTGATGGTACCACACCAGAAAGCCACGGCTAACTACGTG



>7491 len=161 tot-seq=1

TCGAGAATCATTACAATGGGGGAAACCCTGATGGTGCGACGCCGCGTGGGGGAATGAAG  
GTCTTCGGATTGTAAACTTCTGTTGTTAGGGAAGAATGACCTATATAGGAAATGATATAG  
GAGTGACGGTACCTTTCAAGAAAGCTCCGGCTAACTACGTG

>7492 len=161 tot-seq=1

CCACCCTACTCCCAGCAACCACCGTCCCAGACCCCTCATGCCAACCTTCGTATCAGCAG  
CAGCCACAGTCTCAACCACCACAGCTCCAGTCCCTCTCAGCCTCCATACTCCCAGCAGCCA  
TCCCAGCCTCCACATCAGCAGTCCCCGGCTCCATAACCCCTC

>7493 len=161 tot-seq=1

TGGGGAATCTTCGCAATGGACGAAAGTCTGACGGAGCAGCGCCGCGGAGTGAAGAAGG  
TCTTCGGATTGTAAACTCTGTTATACGGGACGAAAAAGGCGGATGCCGACAGTATCCGT  
CCGTGACGGTACCGTAAGAGAAAGCCACGGCTAACTACGTG

>7494 len=161 tot-seq=1

TAGGGAATCTTCGCAATGGGGGGGACCCTGACCGAGCAACGCCGCGTGAGTGAAGAAGG  
TTTTCGGATCGTAAAGCTCTGTTGTTAAGGAAGAACGGGAGTAGGAGTGGAAAGCCTACT  
TTGTGACGGTACTTAACCAGAAAGGGACGGCTAACTACGTG

>7495 len=161 tot-seq=1

TGGGGAATCTTGCACAATGGGCGAAAGCCTGATGCAGCGACGCCGCGTGAGTGAAGACGG  
CCTTCGGGTTGTAAAGCTCTGTGATCCGGGACGAAAGAGCCTTGGGTAATAGCCTAAGG  
AAGTGACGGTACCGGAAAAGCAAGCCACGGCTAACTACGTG

>7496 len=161 tot-seq=1

TGGTTATAAGGTGGGTAAGGACTGGGAAGAAGGAAGCTGGAAGTGATGGTCTTCGTTTTATGG  
GAACAAAATGCATTTACATCTCAATGTTAACCACCCTGTTAACTGACCTCTCACATCCCA  
ATACTATCTCTCTTTTTCTTTTACCCAGTATTGAATTC

>7497 len=161 tot-seq=1

TAGGGAATCTTCGCAATGGGGGGAACCCTGACCGAGCAACGCCGCGTGAGCGAAGAAGG  
CCTTCGGGTTGTAAAGCTCTGTTATTCGGGAAGAAAGATTGTTTGTGAACAATGAACGG  
AAGTGACGGTACCGAAAAGAGAAAGCCACGGCTAACTACGTG

>7498 len=161 tot-seq=1

TAGGGAATATTGCACAATGGAGGGAAGCTCTGATGCAGCGACGCCGCGTGAGTGAAGAAGG  
TTTTCGGATCGTAAAGCTCTGTTGTTAAGGAAGAACGAGTGTGAGAATGGAAAGTTCATG  
CTGTGACGGTACTTAACCAGAAAGGGACGGCTAACTACGTG

>7499 len=161 tot-seq=1

TGGGGAATATTGCACAATGGGCGCAAGCCTGATGCAGCGACGCCGCGTGAGGGATGGAGG  
CCTTCGGGTTGTAAACCTCTTTTAATCGGGACGAATGGTCGGTGTGCAAATAGTGCATGG  
ACATGACGGTACCGGAATAGAAAGCCACGGCTAACTACGTG

>7500 len=161 tot-seq=1

TAGGGAATTTTCGTCAATGGGGGGAACCCTGAACGAGCAATGCCGCGTGAGTGAGGAAGG  
TCTTCGGATCGTAAAGCTCTGTTGTTAAGGAAGAACGAGTGTGAGAATGGAAAGTTCATG  
CTGTGACGGTACTTAACCAGAAAGGGACGGCTAACTACGTG

>7501 len=161 tot-seq=1

TGAGGAATATTGGTCAATGGACGGAAGTCTGAACCAGCCAAGTAGCGTGCAGGATGACGG  
CCCTATGGGTTGTAAACTGCTTTTGTGAGAGACGAAAAGGGACGTACGAATAATACGTTT  
CGCTGACGGTATCTGAAGAATAAGCACCGGCTAACTACGTG

>7502 len=161 tot-seq=1

TGGGGAATATTGGACAATGGAGGAAACTCTGATCCAGCAATTCTGTGTGAGTGAAGACGG  
CCTTCGGGTTGTAAACTCTGTGATTCGGGACGAAAGATAAGCAGACGAATAATCTGCAT  
AAGTGACGGTACCGAAAAAGCAAGCCACGGCTAACTACGTG

>7503 len=161 tot-seq=1

TGGGGAATCTCCGCAATGGACGAAAGTCTGACGGAGCAACACCGCGTGAGTGATGACGG  
TCTTCGGATTGTAAAGCTCTGTTAATCGGGACGAATGGTTTGTGTGCAAATAGTGCATAG  
ACATGACGGTACCCTGTGAGGAAGCCCCGGCTAACTACGTG

>7504 len=161 tot-seq=1

TGGGGAATCTCCGCAATGGACGAAAGTCTGACGGAGCAACGCCGCGTGAGTGATGACGG  
TCTTCGGATTGTAAAGCTCTGTTAATCGGGACGAATGGCGTAGCGGTCAATACCCGTTAC  
GAGTGACGGTACCGTAAGAGAAAGCCACGGCTAACTACGTG

>7505 len=161 tot-seq=1

TGGGGAATATTGCACAATGGGCGCAAGCCTGATGCAGCAACGCCGCGTGAGTGAAGAAGG

GTTTCGACTCGTAAAGCTCTGTTGTCGGGGACGAACGTGGAGACGGCGAATAGCCGTTTC  
CAATGACGGTACCTGACGAGGAAGCCACGGCTAACTACGTG

>7506 len=161 tot-seq=1

TGGGGAATCTCCGCAATGGACGAAAGTCTGACGGAGCAACGCCGCGTGAGTGATGACGG  
TCTTCGGATTGTAAAGTCTGTTATATGGGACGAACAGGACATCGGTCAATACCCGGTGT  
CTTTGACGGTACCGTAAGAGAAAGCCACGGCTAACTACGTG

>7507 len=161 tot-seq=1

TGGGGAATTTTGGACAATGGGGGCAGCCCTGATCCAGCCATGCCGCGTGCAGGATGAAGG  
TCTTCGGATTGTAAAGCTCTGTTAATCGGGACGAATGGTCGGTGTGCAAATAGTGCATGG  
ACATGACGGTACCGGAATAGAAAGCCACGGCTAACTACGTG

>7508 len=161 tot-seq=1

TGGGGAATCTCCGCAATGGACGAAAGTCTGACGGAGCAACGCCGCGTGAGTGATGACGG  
TCTTCGACTCGTAAAGCTCTGTTGTCGGGGACGAACGTGGAGACGGCGAATAGCCGTTTC  
CAATGACGGTACCTGACGAGGAAGCCACGGCTAACTACGTG

>7509 len=161 tot-seq=1

TAGGGAATCTCCACAATGGACGAAAGTCTGATGGAGCAACGCCGCGTGAATGAAGAAGG  
CCTTCGGGTCGTAAAGCTCTGTTAATCGGGACGAATGGTCGGTGTGCAAATAGTGCATGG  
ACATGACGGTACCGGAATAGAAAGCCACGGCTAACTACGTG

>7510 len=161 tot-seq=1

TTAGGAATATTCGTCAATGGGGGAAACCCTGAACGAGCAATGCCGCGTGAAGGAAGAAGG  
TCCTATGGATTGTAACTTCTGTTGTAAAGGAAGAACGACCTAAGTAGGAAATGACTTAG  
GAGTGACGGTACTTTATTAGAAAGCTCCGGCTAACTACGTG

>7511 len=161 tot-seq=1

TGGGGAATATTGCACAATGGGCGCAAGCCTGATGCAGCAACGCCGCGTGAACGATGAAGG  
TCTTCGGATCGTAAAGTTCTGTTAATCGGGACGAATGGTTTGTGTGCAAATAGTGCATAG  
ACATGACGGTACCGGAATAGAAAGCCACGGCTAACTACGTG

>7512 len=161 tot-seq=1

TAGGGAATATTCCACAATGAGCGAAAGCTTGATGGAGCGACACAGCGTGACGATGAAGG  
TCTTCGGATCGTAAAGCTCTGTTGTTAGAGAAGAACGTTGGTAGGAGTGGAAAATCTACC

AAGTGACGGTAACTAACCAGAAAGGGACGGCTAACTACGTG

>7513 len=161 tot-seq=1

TAGGGAATCTTCGGCAATGGACGAAAGTCTGACCGAGCAACGCCGCGTGAGTGAAGAAGG

TTTTCGGGTTGTAAACTCTGTTATACGGGACGAATGTAGGCATGGTTAATACCCATGCG

TAGTGACGGTACCGTAAGAGAAAGCCACGGCTAACTACGTG

>7514 len=161 tot-seq=1

TGGGGAATCTTGCACAATGGGCGAAAGCCTGACCGAGCAACGCCGCGTGAGTGAAGAAGG

TTTTCGGATCGTAAACTCTGTTGGTAGAGAAGAACGTTGGTGAGAGTGGAAAGCTCATC

AAGTGACGGTAACTACCCAGAAAGGGACGGCTAACTACGTG

>7515 len=161 tot-seq=1

TGGGGAATATTGCACAATGGAGGGAACTCTGATGCAGCGACGCCGCGTGAGTGAAGACGG

CCTTCGGGTTGTAAACTCTGTGATTCGGGACGAAAGATAAGTAGACGAATAATCTGCAT

AAGTGACGGTACCGAAAAAGCAAGCCACGGCTAACTACGTG

>7516 len=161 tot-seq=1

TGGGGGATATTGCACAATGGAGGCAACTCTGATGCAGCAACGCCGCGTGAGTGATGACGG

CCTTCGGGTTGTAAAGCTCTGTTAATCGGGACGAATGGTCTTTGTGTGAATAATGCAAAG

ATTTGACGGTACCGGAATAGAAAGCCACGGCTAACTACGTG

>7517 len=161 tot-seq=1

TGGGGAATCTTCCGCAATGGGCGCAAGCCTGACGGAGCAATGCCGCGTGAACGAAGAAGG

TCTTCGGATTGTAAAGTTCTGTCCTTATCGAAGAGAGGGTATAGAGTAAAAATGATATA

CTAGGACGGTAGATGAGGAGGAAGCCCCGGCTAACTACGTG

>7518 len=161 tot-seq=1

TTAGGAATATTCGACAATGGGGGAAACCCTGATCGAGCAATGCCGCGTGAAGGATGAAGG

TCCTATGGATTGTAAACTTCTGTTGTTAGGGAAGAATGACCTATATAGGAAATGATATAG

GAGTGACGGTACCTTTCAAGAAAGCTCCGGCTAACTACGTG

>7519 len=161 tot-seq=1

TGGGGAATCTTCCGCAATGGACGGAAGTCTGACGGAGCAACGCCGCGTGAGTGATGACGG

CCTTCGGGTTGTAAAGCTCTGTTAATCGGGACGAAAGGCCTTCTTGCAAATAGTGAGAAG

GATTGACGGTACCCAAGGAGGAAGCCACGGCTAACTACGTG

>7520 len=161 tot-seq=1

TAGGGAATTTTGCACAATGGAGGCAACTCTGATGCAGCGACGCCGCGTGAAGGATGAAGG  
TTTTCGGATCGTAAAGCTCTGTTGTTAAGGAAGAACGAGTGTGAGAATGGAAAGTTCATA  
CTGTGACGGTACTTAACCAGAAAGGGACGGCTAACTACGTG

>7521 len=161 tot-seq=1

TAGGGAATCTTCGGCAATGGGGGGAACCCTGACCGAGCAACGCCGCGTGAGTGAAGAAGG  
TTTTCGGATCGTAAAGCTCTGTTGTTAAGGAAGAACGAGTGTGAGAATGGAAAGTTCACA  
CTGTGACGGTATCTTACCTGAAAGGGACGGCTAACTACGTG

>7522 len=161 tot-seq=1

TAGGGAATCTCCGCAATGGGCGAAAGCCTGACCGAGCAACGCCGCGTGAGTGAAGAAGG  
TTTTCGGATCGTAAAGCTCTGTTGTAAGAGAAGAACGGGTACGAGAGTGGAAAATTCATA  
CTGTGACGGTATCTTACCAGAAAGGGACGGCTAACTACGTG

>7523 len=161 tot-seq=1

TAGGGAATCTTCGGCAATGGACGCAAGTCTGACCGAGCAACGCCGCGTGAGTGAAGAAGG  
TTTTCGGATCGTAAACTCTGTTGTTAGAGAAGAACAAGGATGAGAGTGGAAAGTTCACA  
CTGTGACGGTATCTTACCAGAAAGGGACGGCTAACTACGTG

>7524 len=161 tot-seq=1

TGGGGAATATTGGGCAATGGGCGCAAGCCTGACCCAGCAACGCCGCGTGAAGGAAGAAGG  
TTTTCGGATCGTAAACTCTGTTGGTAGAGAAGAACGTTGGTGAGAGTGGAAAGCTCATC  
AAGTGACGGTAACTACCCAGAAAGGGACGGCTAACTACGTG

>7525 len=161 tot-seq=1

TGGGGAATATTGCACAATGGGCGAAAGCCTGATGCAGCGACGCCGCGTGAGGGATGACGG  
CCTTCGGGTTGTAAACCTCTGTTATACGGGACGAAAAGACGGATGCCAACAGTATCCGT  
CCATGACGGTACCGTAAGAGAAAGCCACGGCTAACTACGTG

>7526 len=161 tot-seq=1

TAGGGAATTTTTCACAATGGGCGCAAGCCTTATGAAGCAATGCCGCGTGAACGATGAAGG  
TCTTATAGATTGTAAAGTTCTTTTATATGGGAAGAAACGCTAAAATAGGAAATGATTTTA  
GTTTGACTGTACCATAACGAATAAGGACCGGCTAATTCCGTG

>7527 len=161 tot-seq=1

TAGGGAATCTTCGGCAATGGACGGAAGTCTGACCGAGCAACGCCGCGTGAGTGAAGACGG  
CCTTCGGGTTGTAAACTCTGTGATTCGGGACGAAAGATAAGCAGACGAATAATCTGCAT  
AAGTGACGGTACCGAAAAAGCAAGCCACGGCTAACTACGTG

>7528 len=161 tot-seq=1

TGGGGAATATTGGACAATGGGGGGAACCCTGATCCAGCCATGCCGCGTGTGTGAAGAAGG  
CCTTTTGGTTGTAAAGCACTTTAAGCGAGGAGGAGGCTCCCAGTATTAATACTACTGGAG  
AGTGGACGTTACTCGCAGAATAAGCACCGGCTAACTCTGTG

>7529 len=161 tot-seq=1

TGGGGAATTTTGGACAATGGGGGCAACCCTGATCCAGCCATGCCGCGTGCAGGATGAAGG  
TCTTCGGATTGTAAACTCTGTTGTCAGGGACGAATGTACTGATTTACAATACACTTCGG  
TGTTGACGGTACCTGACGAGGAAGCCACGGCTAACTACGTG

>7530 len=161 tot-seq=1

TGGGGAATCTTCGCAATGGACGAAAGTCTGACGGAGCAACGCCGCGTGAGTGAAGACGG  
CCTTCGGGTTGTAAAGCTCTGTGATCCGGGACGAAAGAGCCTGAGGTGAATAGCTTAAGG  
AAGTGACGGTACCGGAGTAGAAAGCCACGGCTAACTACGTG

>7531 len=161 tot-seq=1

TGGGGAATCTTCGCAATGGACGAAAGTCTGACGGAGCAACGCCGCGTGAGTGATGACAG  
TCTTCGGATTGTAAAGCTCTGTTAATCGGGACGAATGGTTTGTGTGCAAATAGTGCATAG  
ACATGACGGTACCTGACGAGGAAGCCACGGCTAACTACGTG

>7532 len=161 tot-seq=1

TAGGGAATCTTCACAATGGACGCAAGTCTGATGGAGCAACGCCGCGTGAGTGATGAAGG  
TCTTCGGATTGTAAACTCTGTTGTCAGGGACGAATGTACTAATCTATAATACATTTTCGG  
TATCGACGGTACCTGACGAGGAAGCCACGGCTAACTACGTG

>7533 len=161 tot-seq=1

TGGGGAATCTTCGCAATGGACGAAAGTCTGACGGAGCAACGCCGCGTGAGTGATGAAGG  
TCTTCGGATTGTAAACTCTGTTGTCAGGGACGAATGTACTGATCTATAATACACTTCGG  
TATTGACGGTACCGGAATAGAAAGCCACGGCTAACTACGTG

>7534 len=161 tot-seq=1

GTGGGGAATATTGCACAATGGGCGCAAGCCTGATGCAGCCACGCCGCGTGATGAAGAAG

GCCTTCGGGTTGTAAAGTACTTTCAGCGAGGAGGAAGGTGCTGAGGTTAATAACCTCAGC  
AATTGACGTTACTCGCAGAAGAAGCACCGGCTAACTCCGTG

>7535 len=161 tot-seq=1

TAGGGAATCTTCCACAATGGACGAAAGTCTGATGGAGCAATACCATGTGAACGATGAAGG  
TCTTTTTGATTGTAAAGTTCTTTATATGGGAAGAAACGCTAAGATAGGAAATGATTTTA  
GTTTGACTGTACCATTTGAATAAGTATCGGCTAACTATGTG

>7536 len=161 tot-seq=1

TGGGGAATCTACCGCAATGGACGAAGGTCTGACGGAGCAACGCCGCGTGAGTGATGACGG  
CCTTCGGGTTGTAAAGCTCTGTTAATCGGGCGAATGGTCTTTGTGTAATAATGCAAAG  
ATTTGACGGTACCGGAATAGAAAGCCACGGCTAACTACGTG

>7537 len=161 tot-seq=1

TCGAGAGGCTTCGGCAATGGGGGCAACCCTGACCGAGCGACGCCGCGTGGGTGATGAAGA  
TTCTCGGATCGTAAAACCCTGTCAGGTGGGATGAAAAATCATTTCGGTTAACACCCGAGTG  
ACATGACAGTACCACCAGAGGAAGCTCCGGCCAACCTCCGTG

>7538 len=161 tot-seq=1

CATGACCCCCAGTCCCAGGCTCCGGGGTTACACTGCCTTAGTTCCTACTGTACTCCTGTGT  
GACCTTGTGGATGCTAACAGTACCTGCTAATAGGGTTGTTATGGGAATGATAAGAACTAA  
AGTAGATAAATGACTTTGGGCAGTGCCAGGCACATGTTAAG

>7539 len=161 tot-seq=1

TGAGGAATATTCCACAATGGGCGAAAGCCTGATGGAGCAATGCCGCGTGAGTGAAGACGG  
CCTTCGGGTTGTAAACTCTGTGATTCGGGACGAAAGATAAGCAGACGAATAATCTGCAT  
AAGTGACGGTACCGAAAAAGCAAGCCACGGCTAACTACGTG

>7540 len=161 tot-seq=1

TAGGGAATATTCCACAATGAGCGAAAGCTTGATGGAGCGACACAGCGTGACGATGAAGG  
TCTTCGGATCGTAAAGCTCTGTTGTTAAGGAAGAACGAGTGTGAGAATGGAAAGTTCATG  
CTGTGACGGTACTTAACCAGAAAGGGACGGCTAACTACGTG

>7541 len=161 tot-seq=1

TGGGGAATCTTCCGCAATGGACGAAAGTCTGACGGAGCAACGCCGCGTGAGTGTAGAAGG  
TCCTCGGATTGTAAAACCCTGTTATACGGGACGAAAAAGGCGGATGCCAACAGTATCCGT

CCGTGACGGTACCGTAAGAGAAAGCCACGGCTAACTACGTG

>7542 len=161 tot-seq=1

TGGGGAATATTGCACAATGGAGGGAACTCTGATGCAGCGACGCCCGTGTGAGTGAAGAAGG

TCTTCGGATTGTAAACTCTGTTATACGGGACGAAAAAGACGGATGCCAACAGTATCCGT

CCGTGACGGTACCGTAAGAGAAAGCCACGGCTAACTACGTG

>7543 len=161 tot-seq=1

TGGGGAATATTGGACAATGGAGGGAACTCTGATCCAGCAATTCTGTGTGTGTGAAGAAGG

TTTTAGGACTGTAAACTCTGTTATACGGGACGAAAAAGGCGGATGCCAACAGTATCCGT

CCGTGACGGTACCGTAAGAGAAAGCCACGGCTAACTACGTG

>7544 len=161 tot-seq=1

GAGATTACGTTGTGACTGGAGTCAGACGTGTGCTCTTCCGATCTCCTACGGGAGTCAGCA

GTGGGGAATATTGGACAATGGAGGCAAATCTGATCCAGCAATTCTGTGTGTGTGAAGAAG

GTTTTACGGTACCTACAGAAGAAGCGACGGCTAAATACGTG

>7545 len=161 tot-seq=1

TGGGGAATTTTGGACAATGGGGGCAACCCTGATCCAGCAATGCCCGTGTGTGAAGAAGG

CCTTCGGGTCGTAAAGCTCTGTTGTAAGAGAAGAACGTGTGTGAGAGTGGAAGTTCACA

CAGTGACGGTAACTTACCAGAAAGGGACGGCTAACTACGTG

>7546 len=161 tot-seq=1

CCTTGGCGCTTCGCCGGGCATGCACATCTTCAGAGGGCCGCGCAATTCGCGCTGTACCAC

GCCAAGCTCTTCGCCGTGGAGAGCAAGGTGTCGAGCAAGGGCTTTCGCGTTCGTAGAG

CAGCCGGCCGGCTTCGTCATGCGCAGATGGCGGGTACTTC

>7547 len=161 tot-seq=1

TGGGGAATCTCCCGCAGTGGACGAAAGTCTGACTGAGCAACGCCCGTGTGAGTGAAGAAGG

TCTTCGGATTGTAAACTCTGTTATACGGGACGAAAAAGGCGGATGCCAACAGTATCCGT

CCGTGACGGTACCGTAAGAGAAAGCCACGGCTAACTACGTG

>7548 len=161 tot-seq=1

TGGGGAATCTTGCGCAATGGGCGAAAGCCTGACGCAGCCATGCCCGTGAATGATGAAGG

TCTTAGGATTGTAAAGCTCTGTTATACGGGACGAACGGCAAGGTGGTAAATAGCCATCAT

GAGTGACGGTACCGTAAGAGAAAGCCACGGCTAACTACGTG



>7549 len=161 tot-seq=1

TGGGGAATCTCCGCAATGGGCGAAAGCCTGACGGAGCAACGCCGCGTGAGTGAAGACGG  
CCTTCGGGTTGTAAAGCTCTGTTATTCGGGAAGAAAGAGTCGCTTGTGAACAATGAGCGA  
AAGTGACGGTACCGAAAGAGAAAGCCACGGCTAACTACGTG

>7550 len=161 tot-seq=1

TGGGGAATCTCCGCAATGGGCGCAAGCCTGACGGAGCAACGCCGCGTGAGTGAAGAAGG  
GTTTCGACTCGTAAAGCTCTGTTGTCTGGGACGAATGTCAGGACTCAGAATATGGGTTCT  
GAATGACGGTACCTGACGAGGAAGCCACGGCTAACTACGTG

>7551 len=161 tot-seq=1

TGGGGAATATTGCACAATGGGCGCAAGCCTGATGCAGCGACGCCGCGTGCGGGATGAAGG  
CCTTCGGGTTGTAAAGCTCTGTTATACGGGACGGACGGCAAGGTGGTAAATAGCCATCAT  
GAGTGACGGTACCGTAAGAGAAAGCCACGGCTAACTACGTG

>7552 len=161 tot-seq=1

TGGGGAATATTGCACAATGGGCGAAAGTCTGACCGAGCAACGCCGCGTGAGTGATGAAGG  
TTTTCGGATCGTAAACTCTGTTGTTAGAGAAGAACAAGTACCGTTTGAATAAGGCGGTA  
CCTTGACGGTACCTAACGAGAAAGCCCCGGCTAACTACGTG

>7553 len=161 tot-seq=1

TGAGGAATATTGGTCAATGGGCGAGAGCCTGAACCAGCCAAGTAGCGTGCAGGATGACGG  
CCCTATGGGTTGTAAACTCTGTCCTCATCCAAGAGAAGGGAAGGTAGTAACTGACCTTT  
CCAGGACGGTAGATGAGGAGGAAGCCCCGGCTAACTATGTG

>7554 len=161 tot-seq=1

TGGGGAATATTGGACAATGGGGGGAACCCTGATCCAGCCATGCCGCGTGTGTGAAGAAGG  
CCTTATGGTTGTAAAGCACTTTAAGTGAGGAGGAGGCTCTTCTAGTTAATACCTAGGATG  
AGTGGACGTTACTCGCAGAATAAGCACCGGCTAACTCTGTG

>7555 len=161 tot-seq=1

TGAGGAATATTGGTCAATGGACGCGAGTCTGAACCAGCCAAGTAGCGTGAAGGATGACTG  
CCCTATGGGTTGTAAACTTCTTTTATATGGGGATAAAGTGGTCCACGTGTGGACTTTTGT  
ATGTACCATATGAATAAGGATCGGCTAACTCCGTGCCAGCG

>7556 len=161 tot-seq=1

TGGGGAATATTGGGCAATGGAGGAACTCTGACCCAGCAACGCCGCGTGAGTGAAGAAGG  
TTTTCGGATCGTAAAGCTCTGTTGTTAGAGAAGAACGTTGGTAGGAGTGAAAAATCTACC  
AAGTGACGGTAACTAACCAGAAAGGGACGGCTAACTACGTG

>7557 len=161 tot-seq=1

TAGGGAATCTTCCACAATGGGTGCAAACCTGATGGAGCAATGCCGCGTGAATGAAGAAGG  
TCTTCGGATCGTAAAGCTCTGTTGTAAGAGAAGAACGTGTGTGAGAGTGAAAGTTCACA  
CAGTGACGGTAACTTACCAGAAAGGGACGGCTAACTACGTG

>7558 len=161 tot-seq=1

TGGGGAATATTGCACAATGGGGGAAACCCTGATGCAGCGACGCCGCGTGGGCGAGGAAGT  
ATTCGGATCGTAAAGCTCTGTTGTAAGTCAAGAACGAGTGTGAGAGGGGAAAGTTCACG  
CTGTGACGGTAGCTTACCAGAAAGGGACGGCTAACTACGTG

>7559 len=161 tot-seq=1

TGAGGAATATTGGTCAATGGGCGTAACCCTGACCGAGCAACGCCGCGTGAGTGAAGAAGG  
TTTTCGGATCGCAAAGCTCTGTTGTAAGAGAAGAACGTGTGTGAGAGTGAAAGTTCACA  
CAGTGACGGTAACTTACCAGAAAGGGACGGCTAACTACGTG

>7560 len=161 tot-seq=1

TAAGGAATATTCCACAATGGGGGAAACCCTGATGGAGCAATACCGCGTGAGTGAAGAAGG  
TTTTCGGATCGTAAAGCTCTGTTGTAAGAGAAGAACGTGTGTGAGAGTGAAAGTTCACA  
CAGTGACGGTAACTTACCAGAAAGGGACGGCTAACTACGTG

>7561 len=161 tot-seq=1

TGGGGAATTGTTACAATGGGCGCAAGCCTGATGACGCAACGCCGCGTGGGGGATGAAGG  
TCTTCGGATCGTAAACCCTGTGCAATGGGACGAAAGACTCGCGAGTTAATACTTCGCGG  
GAGTGACGGTACCGTTAAAGGAAGCCACGGCTAACTCTGTG

>7562 len=161 tot-seq=1

TAGGGAATATTGCGCAATGGAGGAACTCTGACGCAGCGACGCCGCGTGGGTGATGAAGG  
CCTTCGGGTCGTAAAGCCCTGTCGGAAGGGAAGAAACACGGTATGGCTAACATCCATACC  
GCTTGACGGTACCTTTAAAGGAAGCACCGGCTAACTACGTG

>7563 len=161 tot-seq=1

TAGGGAATCTTCGGCAATGGGGGCAACCCTGACCGAGCAACGCCGCGTGAGTGAAGAAGG

TTTTCGGATCGTAAAGCTCTGTTGTAAGAGAAGAACGTGTGTGAGAGTGGAAAGTTCACA  
CAGTGACGGTAATGGGTAAAGAAGCACCGGCTAACTACGTG

>7564 len=161 tot-seq=1

TGGGGGATATTGGACAATGGGGGAAACCCTGATCCAGCGATGCCGCGTGAGGGAAGAAGG  
TTTTCGGATTGTAAAGCTCTGTTGTAAGAGAAGAACGTGTGTGAGAGTGGAAAGTTCACA  
CAGTGACGGTAACTTACCAGAAAGGGACGGCTAACTACGTG

>7565 len=161 tot-seq=1

TAGGGAATCTTCGGCAATGGGGGAAAGCCTGATCCAGCCATGCCGCGTGTGTGAAGAAGG  
CCTTTTGGTTGTAAAGCACTTTAAGCGAGGAGGAGGCTACTTGGATTAATACTCTAGGAT  
AGTGGACGTTACTCGCAGAATAAGCACCGGCTAACTCTGTG

>7566 len=161 tot-seq=1

TGAGGAATATTGGTCAATGGACGAGAGTCTGAACCAGCCAAGTAGCGTGAGTGAAGACAG  
CCTTCGGGTTGTAAACTCTGTGATTCGGGACGAAAGATAAGCAGACGAATAATCTGCAT  
AAGTGACGGTACCGAAAAAGCAAGCCACGGCTAACTACGTG

>7567 len=161 tot-seq=1

TGGGGAATCTTCGCAATGGACGAAAGCCTGACGGAGCAACGCCGCGTGAGTGAAGAAGG  
TCTTCGGATTGTAAACTCTGTTACACGGGACGAGAAAGGCGGATGCCAACAGTATCCGT  
CCGTGACGGTACCGTAAGAGAAAGCCACGGCTAACTACGTG

>7568 len=161 tot-seq=1

TGGGGGATATTGCACAATGGGGGAAACCCTGACGCAGCGACGCCGCGTGAGCGAAGAAGG  
CCTTCGGGTCGTAAAGCTCTGTTGTAAGTCAAGAACGAGTGTGAGAGTGGAAAGTTCACA  
CTGTGACGGTAGCTTACCAGAAAGGGACGGCTAACTACGTG

>7569 len=162 tot-seq=1

GAAAGCCCCAGGAGTCTCCTCCATAAGGGTGCAGAGTCGGTATTGACAGATAACATTCCCT  
TCAACACCCCCTCCACCCCCAGCACAGGCCTTTTTCGCTCTCCTAGCGGCATTCCCT  
AGCATCCAATCTGCTCCTGTAAAAAAGGACAGATTGGACCGG

>7570 len=162 tot-seq=1

TCTGTAGACCTGGCTGGCTTCTAACTCAGAGAACTATGTGCCTCTGCCTCCTGAGTGCTG  
ACTGAGTGTATGTTGGGATGAATGGATGTCCTGGAATTCTACTTTACTCTCTGAGACTAT

TCTTCTGTTGTGGAGACAGATATAAAAAATAGGGGTTTCTGT

>7571 len=162 tot-seq=1

CATTAAGTAAACCTCGTTTAAGAAATGGATAGTAAAGGCCAGGGGAGTGGATGAAGCC  
GCAACTGATTTGGAGGGGTCCTGGCCCAACTGAGACAAGACATGACAGCCAACAGTCACT  
ATGCCTCACCGCCGTTTAGTAGCTGGTATTCCACACTGTAGC

>7572 len=162 tot-seq=1

CATCCCAGGGGCTGGGAACATTGGGAGACAAGAGTGAGAGGAAATGCAATCTGCATTTTC  
CTTTTCCTACTTCTTGCTTTGACAGGAAGTGCCCTCTCTGTTCTGACAAATCGAACCCCTT  
TGACAGTGTGAGCTGAAAGAAATAATTCCTTCTATGTAGCTG

>7573 len=162 tot-seq=1

TGGGGAATATTGCACAATGGGCGCAAGCCTGATGCAGCCATGCCGCGTGTATGAAGAAGG  
CCTTCGGGTTGTAAAGTACTTTTCAGCGGGGAGGAAGGGAGTAAAGTTAGTAACTGGCCTT  
TATTTGACGGTAATTAAGTAAAGTACAGGCTAACTACGTG

>7574 len=162 tot-seq=1

ACCAGCCTCCTAAAGAGCCTACATGTGGGCAAGTACCTCCTCCACTTACCCTGTGCCAG  
GCTGTGACCGGCCAAAGAGCACCTCGGAGACGTCCACACCATCAAAGCGCCGTCCTTGAG  
GTAAGCTGGCCTGGGCCAGGGCTACCACAGTTGGAAAAATGT

>7575 len=162 tot-seq=1

TGGGGAATATTGGACAATGGACCAAAAAGTCTGATCCAGCAATTCTGTGTGCACGATGAAG  
TTTTTCGGATCGTAAAGCTCTGTTGTTAGAGAAGAACGTTGGTAGGAGTGGAAAATCTAC  
CAAGTGACGGTAACTAACCAGAAAGGGACGGCTAACTACGTG

>7576 len=162 tot-seq=1

TGGGGAATATTGCACAATGGGCGCAAGCCTGATGCAGCCATGCCGCGTGTATGAAGAAGG  
CCTTCGGGTTGTAAAGTACTTTTCAGCGGGGAGGAAGGGAGTAAAGTTAGTCTCGTGAGAC  
TTTTTGCATGTACCTTATGAATAAGGACCGGCTAATTCCGTG

>7577 len=162 tot-seq=1

TGAGGAATATTGGTCAATGGGCGAGAGTCTGAACCAGCCAAGTAGCGTGCAGGATGACGG  
CCCTATGGGTTGTAAAGCTCTGTTAATCGGGACGAATGGTTTTTGTGTGAATAATGCAA  
GATTTGACGGTACCGGAATAGAAAGCCACGGCTAACTACGTG

>7578 len=162 tot-seq=1

CCCGGGCCAGCAGCTCCCAGTGTGACCGGACAAAAACACGTAGGGGCAGGGACGGTCACC  
ACCCCCAGGGACACAACCCCTGGTCTTGGACCAGTAGAGGACACGGAGGGTTCAGACCCC  
TCCTCAGACCCTCCCCACATATGAAGCAGCGGCTAACCAACT

>7579 len=162 tot-seq=1

AAACCAAGGAGCATCTAGAGAGCCAGCAAACCACAGAGCTTGCGGACAGGCCTTCAGAA  
GGAACCAATCCTGCTGACACCTTGATCTTGAACCTTTAGCCTCCAGAGCTGTGAGGCCAT  
ACATTCCTGTTGTTAAGCTCCCCAGTTTGTGGTACTGTGTT

>7580 len=162 tot-seq=1

GAGATAACAGAGATAATTTCAACAAAATACAACCTGGCTAAGATAGAGTTATGAAAAGTA  
GAGAGACTCTTAGGTCAACATGAAAGTTCCTGAAGTTGCCAGTACCCAAGAGGAATCTTG  
AATGATCAGCAAGATTTATAGCGGCTAGAAGAATATTTATTC

>7581 len=162 tot-seq=1

CGGGCCTGCCGCTCAAGCAGACTGCGGATTCGCTCGGAGCGTCCTGTCTGCAGGGCCAGC  
AGCTCCTCTCCACCTGGGGCATCCGGAACAGAGGTTAGAGTCGGGGGCAGGAGCCCACC  
CTCCCTCCCCAGTCCTGGAGGCTGGGCCCTTACCCGCTGCT

>7582 len=162 tot-seq=1

TTTTTTTTTTCAAGCAGAAGACGGCATAACGAGATCGACAAGTGACTGGAGTTCAGACGTG  
TGCTCTCCGATCTCCTATGGGAGGCAGCAGATACTCGGAAAGCCAGCGGGGACCCCGTGT  
CTTCTGACTCACTGCCATGGCCGACGCCAGACCTCCTTACTC

>7583 len=162 tot-seq=1

TTTCAAGCAGAAGACGGCATAACGAGATCGGTGTGTGACTGGAGTTCAGACGTGTGCGCTT  
CCGATCTCCTATGGGAGGCAGCAGGATTACACACATGGAAGTGGAGAAGGCAATGTGGTG  
ATGGAGACAGATTGGAGTGATGTGGCCACAAGCCAAGGACTG

>7584 len=162 tot-seq=1

TGAGGAATATTGGTCAATGGACGAGAGTCTGAACCAGCCAAGTAGCGTGCAGGATGACGG  
CCCTATGGATCGTAAAGCTCTGTTGTAAGAGAAGAACGAGTGTGAGAGTGGAAAGTTCAC  
ACTGTGACGGTATCTTACCAGAAAGGGACGGCTAACTACGTG

>7585 len=163 tot-seq=1

TAAGACTTGAACCACAGTGAGCCGCCATCACACATTCAAAGGGGCTGTCATCCAAAGGAC  
AGATGAGGAATTCTGGGGAGCTTGCTGTGCAGAACCCAGACCATCACACTACTAAGGAGG  
ATGGGAAATGAGGCAGTCCCATCCGTGACAGTCTTCACATCTC

>7586 len=163 tot-seq=1

AGGTAAGCCACTAGCCTTTTTCAAGGTCTCAAAGTCTGAGTAAGGACTCCTCTGGTGACC  
CCTGCTCTCCCTTTTACATCCACAAAACACCTCCCCTTCCTTGGTTAGGGGGTACAACAG  
GGCAGCTAAGGTCGCCAACCCAGGTGTCTAGAGTCTGTAGAAG

>7587 len=163 tot-seq=1

TCCCTCAGCCTGCACGGAGGTGTGGCGGGAGAGGCACAGGCAGCAACTGCGGCTGCGCGC  
CGCGCTTGTGGGCCAGCTAGAGTTCGGGTGGGAGTGGGTTTGGCAGCCCCGGGCAGCCG  
GCTGCCCCAACGGCCCCAGGCAGTGAGGGGCTTAGCACCTGGA

>7588 len=163 tot-seq=1

GCACAGGCTTTTCTGGAGGGGAGGCTGGTGATGGCTCGGGGGCTTCCCAGCCAGCCCTGT  
TACTTACTTGTCTGCTGACTATCCTGTCCATGGGGTGTCCCAGCCCCACTCCCTCCTCCC  
TCAGACCCAGGAATCCAGGCTCCCAGCCCCTCCTCTCTCAGAC

>7589 len=163 tot-seq=1

GGAAGAAAATGCCACAAAGGACATTTATTAGTAAGGAAGAAAAGCAAGCACCAGGATTTA  
AGGCAGGAAGAGATAGGCAAACCTCTACTGTTCTGTGCAAATGCAGTCGGTTTGCTGCCCT  
TAGCCATAAAGCTGCTAATCCCTGAGCCTCAAAGGGAAAAAAC

>7590 len=163 tot-seq=1

TAGGGAATCTCCACAATGGACGAAAGTCTGATGGAGCAACGCCGCGTGAGTGAGGAAGG  
TTTTCGGATCGTAAAGCTCTGTTGTTGGTAGTGAAGAAAGATAGAGGTAGTAACTGGCCT  
TTATTTGACGGTAATCAACCAGAAAGTCACGGCTAACTACGTG

>7591 len=163 tot-seq=1

TAGGGAATCTCCACAATGGACGAAAGTCTGATGGAGCAACGCCGCGTGAGTGAAGAAGG  
TTTTCGGATCGTAAAGCTCTGTTGTTGGTAGTGAAGAAAGATAGAGGTAGTAACTGGCCT  
TTATTTGACGGTAATTAAGTACTTAGAAAGTCACGGCTAACTACGTG

>7592 len=163 tot-seq=1

CCTGGCCCTTCCCTGCATGCACAGGAGGGAGAGAGAGGTGGAGAGGTGGGTTGGGGTGCC

TGGCACATCCCAGAGTGGGGGACCCACCATGCCCTCCTCTTGCATAATCGAGGGAGTTG  
GCACTCTTGCTGCTCAAGAGCTCCAGGCCAGCCCAGGGAAGTC

>7593 len=163 tot-seq=1

TACACGCGTGTGCCCCGCATGCACATGTGTGTGGTCCACAGGACTCTCCAGGCACGAGGGG  
GAAGGGGTGGTCTTGGGCCTGGAGAAGGCTCAAGGCTCAGGAGCCCCGGGATGAAGGTA  
GCAGCACCAAGGGGCATGGAGGGGGCACTCGCCAGACCCAT

>7594 len=163 tot-seq=1

TGAGGAATATTGGTCAATGGGCGAGAGCCTGAACCAGCCAAGTCGCGTGAAGGAAGACTG  
CCCGCAAGGGTTGTAAAGCTCTGTTATACGGGACGAAAAAGACGGATGCCAACAGTATCC  
GTCCGTGACGGTACCGTAAGAGAAAGCCACGGCTAACTACGTG

>7595 len=163 tot-seq=1

TTTTTTTTTCAAGCAGAAGACGGCATAACGAGATATTCTCGTGATTGGAGTTCAGACGTG  
TGCTCTCCGATCTCCTACGGGCGGCAGCAGTAGGCCTTCTAACAAACAAGCACGTACA  
CCCCCTGAGTCTGTAAAATACCAAAACAATGACGACAGCACCA

>7596 len=163 tot-seq=1

CCCGCCGACGTCTCCGCGTCCCCCGGATTCCAGGTTTCGCGACCCCCGCCGTCTTCGCGCC  
TCCGGGACTCTAGCAGCGGTCTCCGCGACCCCCTAGGATCCAGCCACTGTACCCGTGCTC  
CCCAAACCCAGGCTCCAGCCGTCGTCTCCGCGTCCCCGGGGAT

>7597 len=163 tot-seq=1

TCCATTCAGTCAGTTGCGGGGTTTAGAATTTTATGTTTGGTTTACAGAGTAAATATGAGG  
TGAGGGCTAAAAGCACATTTTCTGAGTCCCAAATCAAGATACATGGGCTAACTAGGGATT  
TTTGTGCCATTTTCAGATGTGAGACGCTGTCTTGGAGGCATGG

>7598 len=163 tot-seq=1

TAGGGAATCTCCGCAATGGGCGAAAGCCTGACGGAGCAACGCCGCGTGAGTGATGAAGG  
TCTTCGGATCGTAAACTCTGTTATTAGGGAAGAACAATGTGTAAGAGTGAAAGTTCA  
CACAGTGACGGTAACTTACCAGAAAGGGACGGCTAACTACGTG

>7599 len=164 tot-seq=1

TGGGGAATAGAGCACAATGGGAGAAAGCCTGATGCAGAGACGCCGCGAGAGCGAAGAAGT  
ATTCGGTAAGTAAAGCTCTATCAGAAGGGAAGAAAATGACGGTACCTTACTAAGAAGCT

CCGGCTAAATACGTGCCACAGCCGCGGTCATCCCCAGATCGGAA

>7600 len=164 tot-seq=1

CACTAGAGCAAGCGAAAGGCATGAAACAGATTCTCCCCTAGAGCTGTAAGAGGCAGTGTG  
GCCCTGGCAACACCTTGCTTTAGGACTTCTAACCTCTAGAATAATGAGATAATGAGAGAG  
TATATTTCTGTTGGTTTCGGCCATGCGGTTTGTGGTAACTGGTT

>7601 len=164 tot-seq=1

GCAGTAGGGAATCTCCACAATGGACGTAAGTCTGATTCTCCACGCCGCGTGAGTGAAG  
AAGGTTTTCGGATCGTAAAGCTCTGTTGTTGGTGAAGAAGGATAGAGGTAGTAACTGGCC  
TTTATTTTCTGTGATCAACCAGAAAGTCACGGCTAACTACGTG

>7602 len=164 tot-seq=1

AGCAGCGAGGAATTTTCCAATGGACGAAAGTCCGATGGAGCAATTCCACGTGAACGAT  
GAAGTCTTCTGATTGTAAAGTTCTTTATTTAGGAAAAAAGCGCGCTAGGAAATGAGT  
GCGCCTTGATGGTACCAATTGAATAAGTGACAGCTAACTATGTG

>7603 len=164 tot-seq=1

CCAATCGCCTCTACCAGGCCCCACCTCCAACATTAGGGATTACAATTCAACATGAGATT  
TGGTGGGGGACACAGGTCCAACCTATATCAATAGGCCCAATCCCAATGCACAATCCCC  
AACCTGGAAGAGCTCCAAAACTCAGAGGGTTTTTGTAAACCCAC

>7604 len=164 tot-seq=1

TAGGGAATATTGCACAATGGGGGAAACCCTGATGCAGCGACGCCGCGTGAGCGAAGAAGG  
CCTTCGGGTCGTAAAGCTCTTTATATGGGAAGATAATGACGGTACCATAAGAAAAAGCC  
CCGGCTAACTACGTGCCAGCAGCCGCGGTATCATTAGATCGGAA

>7605 len=164 tot-seq=1

TAGGGAATCTTCCACAATGGACGAAAGTCTGTTGGAGCAATACCATGTGAACGACGAAGG  
TCTTTTTGATTGTAAAGTTCTTTATGAGGGATAACAAGTATGATAGTACCTCATGAATAAG  
TGACAGCAAATATGTGCCAGCAGCCGCGAATCCGGAGATCGGA

>7606 len=164 tot-seq=1

GGTGGTGGGGCCTGGAAGCTGGGAGGGGTGCTGGGCCTGCTGGGGTGGGATCAGTGGGAG  
AGCTGATTGTTTTGTCTCCTTCTGAGCACAAGAGTAATCTGTAACCTTCCACAGCCTGT  
GATGCGGGCCTGGAGCTCTGCACTGAGCTGCATGTTATCTGCAC



>7607 len=164 tot-seq=1

CAGGGTTTGAAGGGATTGACTCCAATTTTGAGAGGTTTTACTTTTGACAAAATGCAAACA  
GCATTGCATGCTACAGGGAAATCTTTAACGAAAGGAAGGGTTAATCAATGTGTCAAGCTT  
CATTGTTGTCTTATTTTAAGAAATTGCCAGAGCCACGCTAACCT

>7608 len=164 tot-seq=1

CGAAGTTCACTCTTTTCCCCACCTCCACTATCTCCAATAAACTCTCAATGTAAAGTTAAA  
CTGATTGGGCTGTGGGTCAGTTGCATTACATTTAAATAAGCACAGAGAACATCAAAAAC  
TCAGGAAACACAGTGCAGATATCTGCAGCTACCCTTTGATAAAC

>7609 len=164 tot-seq=1

TGGATTACCTGAGTGGGCCCAAATCCAATGACAGATGCCATAAGAGTGAGGCAGGCAGA  
GATTAGACAGAAGAGAACTCACAGAGACACACAGGGAGAAAGCAACATGAAGATGGAGGC  
AGAGATTGGAGTGATGTGTCTACAAGCCAAGAACACAAAGGATC

>7610 len=164 tot-seq=1

GGAGCCAATAAAAATAATTAATTAATTTCATTTTGGAAAAAAAAAAATCCTCTCTTCCTG  
ATAAACAGAACAGGGCAACAACATATTGTTCAAGTATGGTGGCTAAAATCTCACTC  
TGAAAATTATTTGTCATGGCAACGGGTGAGTGTACCCCTGAAG

>7611 len=165 tot-seq=1

CAAAGTCATGCTGCGACATTTAGGTCCAGTGTCTTTTTAACAAAGATGAGGCATCCAACCT  
CATGGCCAGGATCCTCAGAGTGTACCTCTGTGGTCTGTATCCAAAGTTGCCGCCTGTA  
TCTTCCACTAGGTTTTCTTGTAAGAAGGGTGCTAAAATAACCTGG

>7612 len=165 tot-seq=1

GGGACTCTTAGCTGAATGAATTATTAATGGGCTCTCAGAGGGAATAGATTGCTGGGGGA  
TTGCTTTTAATGGATATATTTGTTCTATGTGACCTATCCACCACGAGGTGAGCCACGTT  
GCTCTGCCATGTTTTGCACAATACTTTGCCGCACCTTGACAGAC

>7613 len=165 tot-seq=1

GACTTGGGAAGCTCTTTCTGCACCAGGCCAGTTCTGTTCCACAGGACTCCTTGCTAGAA  
ATAGCTCAGAAGAGAGTGATTCTGGAACTTCTCAGCTCCGCTACAGAATCCAGGACTAG  
ATGAAGAAAGGTCTGAGTGGCCAGATGTGGCACAGGCCTGTCATT

>7614 len=165 tot-seq=1

CAGGGAAGCCCAAAGTGGGCAGTGGGGCAACCCTGACCGAGCAACGCCGCGTGAGTGAAG  
AAGGTTTTCGGATCGTAAAGCTCTGTTGTAAGAGAAGAACGTGTGTGAGAGTGGAAAGTT  
CACACAGTGACGGTAACTTACCAGAAAGGGACGGCTAACTACGTG

>7615 len=165 tot-seq=1

AGAAGTAGGGAATATTAATAAATGGACGAAAGTCTGATGGAGCAACGCCGCGTGAGTGA  
GAAGGTTTTAGGATAGTAAAGATATGTTGTTGGTGAAGAAGGAGAGAGGTAGTAAATGGA  
ATTTATTCGACGGTAATCAACCAGAAAGTCACGGCTAACTACATG

>7616 len=165 tot-seq=1

AAGCCTCTGAATAATGTCCACAAGACTAGAGAAGCCCCTTGAGCCTGCAGCACCTTCAG  
AACTGAATTTCAATAAATCCAGAGGGGGCTTAAGATTTGTGTGAATATCTAAACTGTGCT  
GACAGCTAAAGGAGAAAGGGGTAGGGAGGGAAAATGATCTGTTCG

>7617 len=165 tot-seq=1

GGATGAGCCCTTGACATCACAGCCCTGATGGCTGCCATCCAGCACGGGCACGAGGCCGT  
GGTGCGTCTACTGATGGAGTGGGGCGCGGACCCCAACCACGCAGCCCGGACCGTGGGCTG  
GAGCCCGCTGATGCTGGCCGCACTCACTGGGCGGCTTGGAGTGGC

>7618 len=165 tot-seq=1

GCCCCGACGACCTCCACAACCTCGGCCGAGCAGGCATCGATCAGGGGCCTCTGCAGCG  
TGCTTGGCCACTGCGTGGTGGCAGGAAGACTGGACCCTCGATTCACCTTCTGTTCTGGACG  
TCCTGGTGGCTAATGAGATGGTAGCATTTCCCTCCACTGGTAAGCA

>7619 len=165 tot-seq=1

TACCACGATTTTCGTCTATTCTGACATACTGAAATATATCCTCCACACACAGTTCATCAT  
TGACTGCCGTAATCACTGCATTTATTTCAATTTCCAGCCGATATCACCGACTTTTATTG  
GCAAAAATATCGCTCTCATTGTAAGTACTGATAGACAAAAATATCGCCCT

>7620 len=165 tot-seq=1

GTCAGGCAGTCTGATAGATGTCGACCCAGTGCCAGCATGGCACATCGCGGCCCTCCCCAC  
CTGGGCTAGAGCTGGGACTGGGAAAGCCTTCCACAGAGATGGCACCTGATTGGCATCC  
TAATCATGATCAGTAGTCAGCTGGGGTGGAGGATTTTAGGAAATG

>7621 len=165 tot-seq=1

AACTAAGGTACATTCCTAGGCTTGTACCATAAAACAAGGAGACAACCTGAGAGGTGAGATG

CACAGGTGGAAAATGCCTTGTACTTCCCCTGAGCTGATGAGATTGCACGTATGGAGGAAA  
CTATCTTAGAGTAAGAGTAAAGGATTCCAGTGAGGGGACCACCGC

>7622 len=165 tot-seq=1

GGAGTTCAGACGTGTGCTCTGCCGATCTCCGACGGGAGGCAGCAGCACGTGCAAAGGCC  
TAAGGAATAAGGAGGCACTCACATTGAGAAGCCCAGTCTGGCCAGAGTGCAGAGGGTGAA  
AGGCCTTGGCTGAATGAGATGTGAGGTGGGAAAGGGCAGTGTGGG

>7623 len=165 tot-seq=1

TGGGGAATATTGCACAATGGGGGGAACCCTGATGCAGCGACGCCGCTGAGCGAAGAAGG  
CCTTCGGGTCGTAAAGCTCTTTTATATGGGAAGATAATGACGGTACCATAAGAAAAAGCC  
CCGGCTAACTACGTGCCAGCAGCCGCGTTTTCGCAGATCGGAAGA

>7624 len=165 tot-seq=1

TAAATAGAGACAGAGACCCACAGAGCACAGGGCCACATCACCATGGGAACCCAGATGAA  
GAAAGTTCAGGGAGAATGCTCCCAAGCCTTTGAGACTCAAGACTCCTAAACCAAAAAGAC  
CTCGAGGGGTCATTCAGTTCAGTCTTCTGCCTCCAGACTGGACAG

>7625 len=165 tot-seq=1

TTACAAACCACGTGTCTCATGCCTAGGGGTTGTGGGCAAACCTACCAGTCATGCAGTCT  
GGAATTTTCTCTGGTTAACCTTCAGTCTCCTGGGATACAGCCTAGTGATGGGGAAAGGGA  
TGGACTTTGAAATCAAAACCAAGTATGGAGCTCCAGCTCTGATTTA

>7626 len=165 tot-seq=1

TGTTGTAACGAAGTCGGGATGGCACGAATAATCATTTTAAGAATTTTAGTAACGGTAATA  
ATAATGTTAATTAACCGCATAAGAACACCATGCACATTGCATGCTGCCAACTAAAGCCT  
AAGCCTTTTACGACTGTGAACGTAAAGAATGCATTTAAGCCCATA

>7627 len=166 tot-seq=1

GACAACGCCTGATCCACCCCTTTGGCTCAGAAGGGGGCCACAAAATCTCCTTTAAGGAGG  
TTTTTAACATGATAATCTCAGAGACTCTTTTGGGCAGGTGAGGAAGGACAAGCATTCA  
CATAGAAAGCTGGTAATGGGCTGTTAAGAGGACAATACCTTCTATT

>7628 len=166 tot-seq=1

GCTCAGGAATGTTCTCTCCACCTTCTGCGTGAATTACCAGCAGGACATTGGGCTGAAAA  
CGTTGACTTTTGTCCATTGCTTAGGGCTGTCTGTGCTGTTCTTTTCATTTCTGAGTAAA

GTTCTTTCTTGCTAATTCAGAGACCACACTACTGCTGATGTGGCTA

>7629 len=166 tot-seq=1

AGTAGGAAGCACCAGTAATATGTCCCCCTATCTAGACAAAATTGCACTGGCAGGATCTG  
TCTGATTAACTATTTTCAAACACTGGAGTCCATTAAGTTTTGCAACTTCCAGGGGAAGT  
TTTGAATAGTCAACTGCATTAATTTTGATCAATTCAGCTCTTAGC

>7630 len=166 tot-seq=1

CCTGCCAGCAGGTCATGTAGGACTTTGTAGGCACCATAAGGTCTCAGGCTTTTCCACTGG  
GTGAACGGGAGCTGCACGCACAGGAGGGACACGGTCTGACTGACATTTCCAGTGCGGTTT  
TATCAGCACTGAAACCATCCCCCTTAGCCCTTAAGGCCACACCC

>7631 len=166 tot-seq=1

AATTGCTTGAACCCAGGAGGCAGAGTTGCAGTGAGCCGAGATTGTGCCACTGCACTCTA  
GCCTGGGCAACAAGAGCGAAACTCCATCTCAAAAAAAAAAAAAAGAAAAGAAAGAAAGAAA  
GAAAACATGAATGAATGGCCGGGCACTATGGCTCACACTTGTAAATC

>7632 len=166 tot-seq=1

TTTTTTTCAAGCAGAAGACGGCATAACGAGATCAAGTGGTGACTGGAGTTCAGACGTGTGC  
TCTTCCGATTTCTACGGAAGGCAGCAGAAGGGTAGAAGAAAGAGAAATAATTTCTACCA  
AGCTTATGTCCAGTTCACAAGATGTATTTTGCAAATGTGTCATCTC

>7633 len=166 tot-seq=1

GCACTGCACTTGCCTCAGCCCCATCCTGACTCCCCGTGGATCATCGTGCATGCAGCAGC  
TGTGACCCCCAGAGGCCTCTAGTTCAGCATAAGCTGAGGCAAAGGGGGCCCCCAGGTTCC  
CTCTACTGGTGTGAAGCCCAGCCGGCAAGGGGACTGGGGATCGGCG

>7634 len=166 tot-seq=1

TGGGGAATATTGGGCAATGGGGAAACCCTGACCCAGCAACGCCCGTGAGGGAAGAAGG  
TTTTCGGATTGTAAACCTCTGTCTATGGGAAGAAGAAAGTGACGGTACCATAGGAGGAA  
GCCCCGGCTAACTACGTGCCAGCAGCCGCGTAATATGGAGATCGGA

>7635 len=166 tot-seq=1

GGCCCTTCGGAGGAGCGGATGGAAGGCCTTCTCAGGTAAAGGGCAGAGCACACACGCCT  
TTCTGACCACCACCCCAAGGGCCCAGCCGCTTCCAGGGACCAAGACAAGAGGCCCTGTG  
GTCTTCTAGGTGAGCTGTAGTCAGCCTCTGTCGCTTCTGAATAATC

>7636 len=166 tot-seq=1

CCATATCAGAAACCTGAGACCCAAGGGGCTACTATCGGGGGAACAGGCGGTCAGCCAACC  
CTGATAAGAGGTGCCTGCCCGGAGTGTCTCACAAACACCCTGTCATCAGAGGGCTGTGCT  
GGGTCACGAGGCAGTCAATCCACTGCCATGCAGGGCTGGGGGTTGT

>7637 len=166 tot-seq=1

GCTGGGGGTGGGGACGGAGGCAAATGAGAGACAGGGTAAGATCTGAGCTGGTCCCGGGC  
TCAGGCTGGAGTTCATGGCAGCTCACTCCAGCAGCAGGGTCGGGGCCCATGGGCAGGGAT  
GGGTGGAAGGATTTTTCCAGCCTCACTGAGAGCAGGTCTTGGCCTG

>7638 len=167 tot-seq=1

ATGTTTTTCTAGGAAGGTGGTGCCTCTCTTCCACAGCTTCTCGTTTTGACTCTGGTACTT  
AGACTGGAGTTGCTTCATCTGGTTCTGGAATTCTTGAACGGCAGTGGTTTCCACTGCAGG  
GGTATGAAAGAACCAAATAGTCCCACTGCAAGGATGGCAACAAGTC

>7639 len=167 tot-seq=1

GAGGCAGCAGAAGAGATGGGAGGTGGGGTTAATGTTTGGGGGAAACATCTCAATGAGG  
GTGTCTTTTAGAGGGCTCATCTTGACCCCTTCTTTTCTGTGCCTACCTCTAGGCCACCA  
TATGGTGAGCTGACCTTCCTCAGGCTCCCTTACCCTTGATGCCCTTC

>7640 len=167 tot-seq=1

GGGTGCTGTGTAATCTGTGCTGAGGCTCAGGTGGCTCGCACCCAGAGTCAATAGTCTGC  
GATGCCGAACCAAGAGGAATGCCTTTTATCCGATTGTTAGGGTCCAGGCTTCCCGTGC  
GCGTTCTGTGGACTCCACGGGAAATTGGCGATGCCGAGATGTTAATG

>7641 len=167 tot-seq=1

CTCCCTGAATGTTCCCTATTTTCATCTAAACCTTGGTATTGCATCACACTTGGTACTC  
CAAGTCCAGATAGTGTATAGGTTCCATTTATGAAATCAATGAACATTGTCAGCATTTTAA  
AAAGCTTATGTAAATGACCGCCCCACCATAAGATATATAGAAAAAGG

>7642 len=167 tot-seq=1

GAGAGGGAATGGAAATTGGTGAAGAAGCATCAGGAGACATAGGACAGGGGAGTCTCCTG  
CTAGTCTATGGGGTGACCCTAGCTGAGACTCCGATCAGCCGGGGGTACAGAGACTTAAGG  
GGCCACATCCTGTAGCCAGGAGGGAGTTCAGTGGAGGGAAGGGGATA

>7643 len=167 tot-seq=1

GGCCTTGGAGCAGCTGCATCTATAGGCAGGGAGCAGAGAACAATTGAAGATTGTGCCACT  
CAGTTTGTTCCTTTACCTGGTGCTAGACTTGGTATACCTGCCAGGGAATGTCACTGCCC  
ATAGTGGGCACATCCTCCTCCTCAGTTAATGCATGCAAGGTAAGT

>7644 len=167 tot-seq=1

GGGGAGAAGAATGGAGGACATTGAGTTTTGGGGAAGAAAGGGTAGCTGCAGGTGGGGGCT  
AGGGCTGCTGAACACAGAAGCCACTGCCCTGTCCACCTCTGTCCACAGTACAGGTCTTC  
AGACACTTACACAGTCTTGGCTCCTGTGTTCCCTGCAGGACGCTGGT

>7645 len=167 tot-seq=1

GGAGGCAGCAGGGAGGAAGAGGGGGCAATGGGCGAGAGCCTGAACCAGAAAAGTCGCGTG  
AGGGAAGACGGTCCGAGGGAGGGGAAACCGCGGGGGTCTGGGGAGCAAAGAGGCCTCGGGA  
GGGCAAAGTGAGAGGACCCGAAGAAAAGAATCGGCTAACTCCGTG

>7646 len=167 tot-seq=1

CTCCAAGCAACCACACTAAGGAAGCCCAAGGCCAGAGTGCCCCAGCCCATTTTCCAAC  
TAGTGGGTCCCATTTTCTTATCACTTAGTTGAGAGTCGGCTCTGTTCCAGACCGGCAGC  
CTAGAGCAGTGGGCTGGAGCAAAGAGATGCAGCTGAGCTAGAGCAAC

>7647 len=167 tot-seq=1

CTAGAAAAGTGCCACATTTTCGATTCTAAACAGTTTCAAGGTTGGTTGAATGTCGGCA  
AACACTTCAGGGAAAGCCTGTTTTTTGAGGTGACCCTGTAGGATACTCATGGAATGTGAA  
GGCTTGCCTATAAAACAGCAAGGTTTTCTGCGACATGGAAACACCAG

>7648 len=167 tot-seq=1

GATAGAGGTGAACTATAAGGGGAACCTTATCCCCTATGTCCAGCACATACCTACGCTAC  
GATGCTCCAGCTTGATGAGCCTATCCAGACTTCTTGGCTCAAGGGGGTACTTGCTTCTGT  
AGAGCTACGTGGCAATGGCCCCGATCTACTGGGACTCGGAGAATATGC

>7649 len=167 tot-seq=1

TAGAAGCTGTCCCCATCATCCCCAGGCCCATCCTGGGAGCCCCGTCACCAACCACCT  
TTCTCTTAGTCTCAGCTGGCCTCGATATTGTCACCAAGTAACTTTGGGGTCAACAAA  
CATGGGTAGGAACCAACATTAGCACGGTCAGCAAATGCGCCCCCTGCT

>7650 len=167 tot-seq=1

TAAATCTACAGGGAGAGATAGAGTCCAATACAATGATAGTTGAGAACTTCAACATCCTAC

TGTCAGCATTGGACAGTTCATCTAGACATAAAATCAACAAAGAAACATTAGACTTAAGCT  
GCACTTTAGACCAAATGGACCTAACAGATATTTTCAGAATATTTTCAT

>7651 len=167 tot-seq=1

ATTCTGTTCTTCCCTCACCTCTGACTCCACAACCAGGTCCATCTGGCTGCACATTCCCA  
GCACCTGCTGTCTATCTGCATGCCACAGAAACCCTGAGCCGGGTGCGCTGGCTGAGTTGG  
AACTGGGTCTGGGGATGAGGCTAACCAGGCATTGCGTGGATCTCAC

>7652 len=167 tot-seq=1

GATAATCTGCCGGAAGTGTCCAATCCGACACCGAGCAGCTTTTCTACAGCGCTGTCCAC  
CCCCTTTGAAGTGATATGGGCTTTTCCCTTCTTTCATCTATTTTCATAAAAGTCCGC  
TTTTCTTTATGCTCTACAGGCTTGCTCCTGTCACCTTCTGCCGCT

>7653 len=167 tot-seq=1

AGGTGGTGGGGGGGATGACGGAAGCAACCGGGTATGCGGCCTTGCATCTTAGCCCTGCC  
CTAACTCCCATGTGACCTTGAGCACTCCCCTCCCCATCTGCGGGCAGGCAAGGGGCTCGG  
GATGCCGCTATAGGGCTCAACCCCACTGGGCTAGAAACAACCAAGGC

>7654 len=167 tot-seq=1

AATTGGTACATGGCTTAATACTATCTACTACTATGACTCTCCTTGCTTAATTGGCTTCC  
AGGAAAATTTTCATGAGCCTTTGTGGTTGTGGTTTAGTTAAATACACACATTTACCTAGAG  
GCAGGCTGGGGGAGGAGAGCAGAGTGCTTTCCTGACTATCCAATC

>7655 len=167 tot-seq=1

TGAGGAATATTGGTCAATGGACGAGAGTCTGAACCAGCCAAGTAGCGTGCAGGATGACGG  
CCCTATGGGTTGTAAACCGCTTTTGATTGGGAGCAAGCCTTCGGGTGAGTGTACCTTTCG  
AATAAGCGCCGGCTAACTACGTGCCAGCAGCCGCGTAATACTTAGAT

>7656 len=167 tot-seq=1

CATTTCTCAAAGAAGACATACAAACAGCCAACAAATCTATTTTAAAAGCTCAACATCA  
CTAATTATCAGAGAAAATGCAAATTGAAACCACAATGAGATACCATCTCATACCAGTCAG  
AATGGTCATTACTACAAAGTTAAAAAAATAAAAAATAAAATAAAATAA

>7657 len=167 tot-seq=1

CAAAAACAGGCTCAAGAAGCCGAGGGCGATAGCGGTGAGCAGCCAGCGTACCCAGGCGGC  
CTCGGTGATGGCGGCGTTTTTCTGGATCAGCGGCCCGCGGCCAAACTGTTGCGGAATGGG

CGGCTCGCCACCATGGTCGGGCACGGCGTGGCCAATGTCTGGGGAGG

>7658 len=168 tot-seq=1

CCAGGTGCTGCATGTCCCAGGTGAGGTTCTTGCTGCAAAGGAGAGAACGTCTGGGGT  
CAGGCTTTCTGGCATGTGGCTGCAGAAAACAGCTGCCTGACAGGGAGCATGGGTGGGACA  
GGCTGTTGCTTGCCCACTTACTTGGCCTCCAGGGTGAGAGCAATGATA

>7659 len=168 tot-seq=1

GATCCAGCATATGAAGCCAATGTCAAAAATAGTGAGACCTTAAAATACAGTAGGGCGGGT  
GTGTGTGTGTAGGGGGGTGACCCAGCTGATAAAGCTCTGCTGTACAAAAGGGCTGTGTT  
TGACCTCTGCACTCGCATTCAAAGCCAGGTAAGGGTACACACTCACAA

>7660 len=168 tot-seq=1

AGGGGAACAAGTGTCTACAGGGATAAGACTTGGTTCATGAGATATTTGCGGTTGTTGTA  
TAATAATAAAACCTTTACCTGTCTTAAATCTAAGTCACTTTGCTTCAGTAGATGACCTGC  
CTTCTGAGTTCCTCTGAGGTGAGAACTGTTTAGCACCTCACCTAAG

>7661 len=168 tot-seq=1

GAGTGCACCCAGGAAGACATGGAAGGTGGTGGAAAGGTTGTGTTAATCTGCATGGGCTTT  
CCACTGGGGGGTCAATTGTGCAAATGGAAGTACTGTTTCATCAGCCTTCAAAGGTGTGGCT  
TTTTGCCAGATACAACCTTTTGTTCGTTCTCAGACTCTCCCAACTGTA

>7662 len=168 tot-seq=1

CAGACAGATATGGTTAAGGGAGTTGTGCCCTCTGACCTTTCAACCCTTGATCCTCTCAC  
AGCAGGTGGCCTGAAGCCCTTCTGGGCATCTCCCTCTTCCGACACTGTTGATCCTTG  
CCGTGCAATAAGCCTGACCCTATACAGGTGACTCACGTGCGCTGATCA

>7663 len=168 tot-seq=1

AAAGGACAGTCAACCCTAAGGAAGGCCAGTGGTGGGTTCCACAAACCAGTGGAAATCCCA  
GTGCTCTCGAGTCTGCCCTTCCAGACTTTCTTCCAGTGTGTGTGAACTCTTGCCTGGA  
GGGTGGGAAGGGGCTAGCCCTCTAGGAGGCCCTAGGACCAGCCTAACC

>7664 len=168 tot-seq=1

GCTCCAAAATACCTGTATCCAATTTGTATTATCCCCAGCTCTCAGGGACAAGACCAGT  
CCCCAGCGTGGTGGTCAGCACGGAAGCTCCACCTTCTGGGTGGAGGTGCCATCCTAACC  
ATCCAGCCAGGCCACCCACAACCCGAGAATCAGGGAGAAAGTCCCTCC



>7665 len=168 tot-seq=1

TCTCTTGAGCCAGACCCCAGACCCTGGCTCTGCCTCTTACCAGGTGTTTGAGCTGACACA  
AATTATTTAACCTCCTTGTGCCTCAGTTCCTCATCTGTAAAACCAGAAAACAGGAATACT  
TACCTTCATGGGGCGGCTATGAGTACTCACTGAGCAAATTCATGACAC

>7666 len=168 tot-seq=1

AGTATGTTTCATACGTGTTGAACTGTGTAAAGTTACCTGAGAGAGTGGGGTTAACCTCAA  
AAGAAATAGAAAACATGGCCTGTTCCATGGATGACTTCAGTCTTATTGGGAGATCTAACA  
TTCATTGCTGAAACCAAGAGCAGTGATTGTCCAAGTATGGTCCCTGGA

>7667 len=168 tot-seq=1

CCACTGTCTCCCATCTCCCATGGCCTCCTTGGCCCCAACTCAAGCCTTGAACCTCACTG  
CCCCAGCCCCTGGGCTGAGGCATGAACACCCCCTCTGGGTCCAGTCAGAGCCCCCGGTGC  
CAGGGATGGGGAGGCATAGGGCTCTTGGCCGCCAGCCGCGTGAAGGTG

>7668 len=168 tot-seq=1

TGTGGGGAGGGCATGGGCAGGCTGGTGCATGTCAGTGGGGGTCCTCTGCTGCAGCACTC  
TGATAATCAGGTGTGGTCCACTAATGCAGGAGCTATGATGCAGGCCCTCAGAGGTACCTG  
GGGGTTGCACTGCAAGTAGGTGTGGTCAGACTGGGGCCCCAGGAGAAG

>7669 len=168 tot-seq=1

GTGAACGAAAAAACCGTCTTTACGATAAATTACGGCAACATAAGGTTCTTTTTGGCCGT  
GGGCCAATTTACTGATCAGTTTTCGGGGCGGCTTCAGCTTTAATGCCCGATTTTTCAGCTA  
ATTTACAAAATTTGTCGATTTCTCTGAAGGCCGGATCATAGTAAGCGG

>7670 len=168 tot-seq=1

TCACTATAAATGTCCCTGAAATGCAGCTGATGGGAGCTGTACCCACCAGGCCCTTCGTTG  
CAGACAATAAAAAGCCACCTCTATACCTGATAGAGGAAAGGAGAGTGTTGGAAAGAGGTCA  
GAAGAACTAATGAGTTTCCAGAGTATGTGGGAGAGGTCAGTAGAGAC

>7671 len=169 tot-seq=1

TTAGGATGCTAAGACAAGAGCTGAGTTCACAAATGAGTTCAGGGTAGAGCCCCTGCCT  
CTGTGGTTAAGAACTATGAAAAGCACAGTTGAGCTTCTTCTGGTGCTGTGTCACAAACA  
TCCTGAACTCACTGAGTCACAGTGGACAAGACAAACAGCCAAATGACTT

>7672 len=169 tot-seq=1

CACGCACATACATGTACACACACAGGCATACACACCATCATATGGACTGAGTAGAAAAGG  
GAGAGATAATGTAATTATATTATAATTTCAAAAACAAAAAGTAACTTTTAAAAAGTTGAT  
TAAAAGAAAGGAAGGTACATTCTGAATAAGAGAAAGAAATAGCTCAGCC

>7673 len=169 tot-seq=1

TTGGCCATCAGTAGCTGCCTCATGAGAGTTTAGGACTTCGTGGTCCCAGGACTGGCTTAG  
TGTATGGGATAGGTGTACTCTGTGGTATTCCTATGTTGCCAGAGCACTCATGGGCCAGT  
TGTTATGCTTGCAAGTCCACATATAGAGAATGACAACAAAAGTCCTGGC

>7674 len=169 tot-seq=1

CCTTCCTCTCCAGGCTCAACCTCTCAACACCTCAGAACTGAGGCCTTAGGTCTGCTCCT  
CCCTGCGCCCACTTCAGCTAGGGCCCGTGTATCACTCAGAACCAAAAGAAACCCGTCAGC  
GCCACAGGCGCCATCCTTGTTCCATCCAACAGGGCCAAAGTCAACAC

>7675 len=169 tot-seq=1

TCTGCTGTGCTTTTATCAAAGAAAATGTCTATCACAGCAGCAACCTCTTTTAGAAGTGTG  
TGTGTGTGTCCCGTTTTCTTTATTCCTTCGCTCTCTCCATTAATTCATTAATTTTGT  
AAGTCTCTACTAGAGTCTTAAATTCTCCAAACAATAGGGTAGACAACC

>7676 len=169 tot-seq=1

CTTGTCTACTTCACAGGTGCGCAAATGGCAGTTGGGTTGGTGAGTGGGGGTGCCACTG  
GGGGCGAAGTGACCTTCTTCAGGACATAGAAGGACCAGGCCTCTAGCCCAAGTAGACTC  
CGAAGCCTGTGCTCTTGACCTCTGTCTTACACCGCCACATGGCATGTC

>7677 len=169 tot-seq=1

GGGAGTATAGTATAGCATCTCTGCACCTAGCTGTGTCTGAGGCCACCGCTGGCCTTGGGT  
AACAGCGACGATCCTGCCCTGGAGCTGGACCACGGGAGGGTCCGCGCCCTTCTCCCATG  
CAGTGAAGTCAGCCAGCAGTGGCCAGAACAGGCTCCAGCCCTCCGCCCA

>7678 len=169 tot-seq=1

TCCTCGATTTCAACTTCTCAGAGAACTGTGTTGGCACCACTATTAGGGTCATCTCTGC  
TCATGCTCCTTCTGAGTCGCCTCATGCTGAACAGCTCAGGAATAAAGGAAAGAACAAAAT  
ATCAACTGAGCAAAAATGGTGAGAGACCTCCCTGGCAAAGATCAGGCCCC

>7679 len=169 tot-seq=1

AGGATGGATTTGAGCCTGGCTGTGTGCGGTCAGGGCACCTCCCATACGCGAGGGGGTGGGA

TCAGTCTCCTGGGGTTGCTGTGACAAATGACCATGAACTCAGTGGCTGAAAAACAAGACAC  
ACATTCGCTCACAAGCAGTCTCGTATCAAGGTGTCAGAAGGGCCACGCT

>7680 len=169 tot-seq=1

AAAGGGGATCCTGCCACAAAAAAGGCTCCACCTGGGAAGTGTTTCCTTGGAGAGAGGG  
GCAGTCCTCAGCACTGGTGCCTGTCTCCAGGATATCTGTTTGTATTCCCTCTACCTCCAT  
CAGAGGCATCATGAGGCTCTACTGAAGAGCTCCACCCCTTCAGGTAGCA

>7681 len=169 tot-seq=1

TAGTCTGGAATCCTTTGTGAGGGACAAATAAACAGAACCCAGTAGCAGTGTCTAAAGTC  
CCTTGTGAGGGAAAAATATTCAGACCTTCGTAGCAGTGTCTGGAATCCTATGTGAGGGA  
AAAACATTTAGACCCTCGTAGCAGAGTCCTGGAATCCTATATGAGGGAC

>7682 len=169 tot-seq=1

GTATCGCTCCTCCAGACACATCGGTGGAGTTGGCAGAACGGTCTGTACCGTAGATAGGCA  
CACCATCGATGACATAAAGGGGGTTGTTGTCTCCGATGATGGAGCTTAAACCACGAATGG  
TCAAGACGTTAGCAGAGCCCAAAGCACCCGATGATGTGGTCATGAAAAC

>7683 len=169 tot-seq=1

GACTAGGGAAGCCTTCCAGGAAAGGTGATGCCTGAGCTGAGTTGTTTTCTTTGAGTTT  
GGAACATTAATTTAATCAGAGGAAAACAAGGGACATGAAAAGGGCAAGGAAATAAGAAAA  
TGAGCTGAGTTTTGAAGGCAATGATCAGATGAAGTGAGAGAAGAATATT

>7684 len=169 tot-seq=1

CTGCAATTTACCCCTTCTCCCTTGTCTGCACAGAGTAGTTGAGGAAGACAGTTGTCCC  
ATTTACCTTTAACACCTGCTCAGCACCTGCTTCTCCCTTCCAACCTCCCCACACCAGAG  
AAAGGCCCCCAGCACTGACCTAGGAGCCATGAGCCAACACCTGCACCGG

>7685 len=169 tot-seq=1

TGGGGGATATTGGACAATGGGGGAAACCCTGATCCAGCGATGCCGCGTGAGGGAAGAAGG  
TTTTCGGATTGTAAACCTCTGTGGACAGGGACGATAATGACGGTACCTGTTTAGAAAGCC  
ACGGCTAACTACGTGCCAGCAGCCGCGTAATCTCGAGATCGGAAGTGGG

>7686 len=169 tot-seq=1

GATGTAGTGGTTAAAAGCATGGGCTGTAGAATCTGACCATCTGGGTTTAAACCCAACTTT  
TATCAACTCTGCAAGGTGGGGAAAATAACCTACCGTCTCTAGGGCTGTCGTGATAATTGA

GTGAATAAAGATTCACCCAGGTGGTGGCTGCCCTGTCGTAAGCACTGTG

>7687 len=170 tot-seq=1

TCATCTGGGAAGAAGACTGGACTGCCAGAGGAGGCTGGATTTGCGGTGGTGGTATCA

CATGCTAACTGGGAGAACGTTGGGTTACCTTAAATTACCATCCATGCATGCCTCTTCTCT

GTGTCCTGGGCCTTATAGTTCAGAGTGCCCCAAACAAGTGTTTCAGCAAAC

>7688 len=170 tot-seq=1

TGTGGCCAGGAGGAGGGGGTGTGAGAAGGCTCCCCTCCTACCCTGGGCCAACTTTCTCA

GGGTCCAGGAAGCCCAGGGAATTCTGAACTTTCCAGCAGCCCAGCGGTAATAGCTAGAT

CGGAGAGCGTCGTGTAGGGAAAGAGTGTGCCAATGTGTAGATCTCGGTGG

>7689 len=170 tot-seq=1

AGCAACTGTTTGTTCATTTCACCTGGCAATTGATTGATTTCAGAGAGGTCTTTTTAT

AAACAGGCAGTGGTGGGCTAACTATCTTTTCATTGTTTGTTCATTCTAGCTACCCGA

CCACTGGGAAAAAGCTGTCATCACAGTGCAGCGACCTGGAAGGATTCCAA

>7690 len=170 tot-seq=1

CGGAGCTGCTGGGAGTGGGAGTGACTCCCCACCTCGGGCCCCACCCTGTCCCTGTCCT

CTTCCCGCTTGCCCTGAGTTTAGAAGAGCAGCCGCTGCCACCACTGCCACTCGGGAGGGC

ACCAGGGCTGCTGGCTAGGGAGGGACAGGGCAGGGAGGCTCTGGCCAGTC

>7691 len=170 tot-seq=1

GTGGAGTTGGGAGATGTCATCACTCAGGATTTGGGAAGGGTAAGTGCATAGAGTGAGAAG

AGAGAGAGGTTGAGGAGTGGATACTGGGAAAAGGGCATTGAGGTTGGGCAAAGGAAGAG

GATGGAGAGAGAGGAAGAGAGTGGTGAACTGAGGTGGGGTTGTCATGTC

>7692 len=170 tot-seq=1

CCTATGAACTCATTTTGACCTGTGTTAAAGCCAACCTCAACATGGCCTGAGAATGACTTCG

TACTTCTTGAGACCTTGTGTATGAACTGCAACCTAGCTTAATAGGTAGGCAAGGCTGAAA

ACTTAACTTAGGAGTGTGTGCTGTAACAATAGCTGAGTCTTGCCAATC

>7693 len=170 tot-seq=1

TAGAGGTAGCAGGAGTGTTCAGGTACGGACGCTCGTTGAAGTGTGTTCAAATGAACGG

CTCAAGAAACTCATGTCGTCTTTCTGTAACCTCCGGCTTGTAGCGTTCCTTGATGAACCAG

TCCTGCTTATGCACGACGCAGAAGTCCGGCAGTACCTTGGTAGCCTTGCA

>7694 len=170 tot-seq=1

GCAGAGCCGCTGGTTATTGAAACACCAGAGCCAGCTACAGAGGGCAGCATAAGAGTATAT  
GATTATGACGGCTGCTGTATTTATGCGTATTACGGAGAAATCAAGATAAACAGCGACGGC  
AGGGACGGAAAGCAGATTGATATTGAATGTGCGGGGTATTTAGAGGGATA

>7695 len=170 tot-seq=1

AACGGGAGGCAGCAGTGAGGAATATTGGTCAATGGACGAGAGTCCGAACCAGCCAAGTAG  
CGTGCAGGATGACGGCCCTATGGGTTGTAACTTCTTTGTTTGGGAATAATCTACAGTA  
CGTATAATGTTTTGCATGTACCATTGAATAAGGACCGGCTAATTCCTG

>7696 len=171 tot-seq=1

AACTTAGGAAATTAGCCTGAACAGGTGAGAGGGTGCGCCAGAGAACCGGACAGCTTCTGG  
GACAGGCGGAAGCACAGAGCTGCTGGGGCAGCACCTTGGCGGGCCGACAGACCGCGCC  
ACCGTCCGGACCAGAGGACAGGTGTCCTCCTGGCTTGGGAGGCAGCCTCAG

>7697 len=171 tot-seq=1

CTTAGGAAATTAGTCGGAACAGGTTAGAGGGTGCACCAGAGAACCGGACAGCTTCTGGGA  
CATGCGGAAGCACAGAGCCACTGAGGCAGCAGCCTGGGCGGGCCACAGACAACCGGCCAC  
CATCCGGACCAGAGGACAGGTGTCCACCTGGCTTGGGAGAAGGCCTCAGCC

>7698 len=171 tot-seq=1

CTTTCTCCAGTCAAGCTCTTTAGGCCACCTCCTGCCTCGCGGTGGCCTGCACAGACCCA  
GCTCTGGCTTGAGAAGAGCCGCTGCAGGCCCACTCCTGCCTCCCAGGGGACTGTCCAGG  
CCCAGCTCTTGCCTCACGGCGCCTTCCCAGGGCCCAGTTCCTGCCTGCCTC

>7699 len=171 tot-seq=1

GGAAGCCTGGAGGCAGGCGCAGAGCCTCTGGGCCTGGGTGCCTACCCCTGCCACCCCCA  
GGGCCTCAGGCCACAGGAGACCACCTAAAGCAGGAGCCGGGAGTAGGGCCCAGGCTGGGC  
TGGCACAGCTGGGCCTGTGAGGGTGGAGGGGCCGCTGGGGAAGGGACTTA

>7700 len=171 tot-seq=1

AGGGGAGAGGCTGGCTGGGCACTTGGCTCAGGAGGCTGGAGATCTGGATCCCTTCCAGCT  
CCTCCTCCTGGCTGTGCAACTTGGCCTTGTTACTGAACGTCTCTGAGCCACATCTGTAGA  
GTGGAGACGGCATTGGACCCATATCACTGTGTCATGTGGGGCTGGTAAGAT

>7701 len=171 tot-seq=1

GGAGGCAGCAGTAGGGAATCTCCACAATGGACGCAAGTCTGATGGAGCAACGCCGCGTG  
AGTGAAGAAGGGTTTCGGATCGTAAAGCTCTGTTGTTGGAGAAGAACACGAGTAAGAGTA  
ACTGTTCAATTCGATGACGGTAGCTAACCAGAAAGTCACGGCTAACTACGTG

>7702 len=171 tot-seq=1

TGTCATGATGGCCGAGTCTATGTCTCCAGTCTGGTTCTAAAAGCCATATTTTAGGGTCAT  
CTATGGTTTTTGGTTGCCAGTGTTCCTCTTCTCCTTTTCAAGTTTTGAGTTCTGGAA  
TATGAAATCAACTTTCAAATATAACAGTATCAATACTGCAATTATTACTG

>7703 len=171 tot-seq=1

GACGCACATCCTGAGGCCTGGTGGGAGGCCGGGCCCGCCCGTGCTCACCAGCTCGTTGGCG  
TGCTTGGACCAGGCCAGATTGCACACTTGGGAGCCCGTGTCGATACACTGCAGTGGTTGT  
CCTGTCAGCGTGTTCCAGAAGCGGATACAGCGGTCAGCTGTGCCGCCCCC

>7704 len=171 tot-seq=1

TGGCAGTGTGGTGGGGAACAGACTGCCAGCATCCATGAGCACATTCAGCCAGTGATAG  
TGTTGGTGTAGGAGAGCAGGGCTGCTAGCACCCGTGTGTGCATTTACACTATTGGTGGTG  
TCATTGCAAAGGCAGTGGACAGGGACTGGTGTCTGTGCACTCATTACA

>7705 len=171 tot-seq=1

GCCATCCTCTAATTACATGTGTGGATCCTCTGGCAACATACCCCCATCCTCCAGGAGTCA  
CCTCATGAACATAAACTCAGGTATAGTGAAAAGGGCTTGCTGTGAATAACAAAAGATGC  
TCCTTTCCACCAATCATTAGAAAACCTCAAAGGTTTTAGAAGCACCGTG

>7706 len=171 tot-seq=1

AGGGCTGATCTAGGACCCCGGTACCTGAGGCCTGTTTCGAGGCGAGAGGGCTGGGCTG  
GCTGGAGCCTGGCCAAGCTAGGAAGAGGGCTGCCTTGGCATGACCTCTTCTCCTCCT  
CGACAGGCCTGTCTTCGCAGCTTACCATCAGTCACTCCCTGTTGGAGCCT

>7707 len=171 tot-seq=1

ACCACACAGACCTCAGCTCAAATCCAGGCTCCATCACTGTGTGACTTTAGAAAAATGACC  
ACCCTCTCTGGGACTCAGTTTTCCACATGGAAGATGAGGATACCAATTTACATAATTT  
ATTGGTAAGCTGTAAAGTGCACTTAAGGAGGCCCTACCCTATCCCC

>7708 len=172 tot-seq=1

GATCCCATCTTTACTACAAGGGTGGAGCAGATGGCGAGGGTCGGGAGTTAGGTGAGGCT

GTAAGCCTTCTAAGCCTACCCCACTGATACACTTTTCCAGCACGGCTGTACCTCCTAAAC  
CTGCCCCCAAAGTACCACCAACTGGGCATCAAATGTTCTAATGTCCAAATGT

>7709 len=172 tot-seq=1

GGGAAGAGTGAAACTGACAACATAGCAGGGCCTATAGTTGTGTGGGAGGCACCTTCTAG  
AACTAGGGTCCTGCCTGGGGGTTTGGGGACCTGGAATCATTGAGGTAATGGCTGTCGGC  
AACCTGGTCTGCCCAATTCCACCTGCTTCTTATATATGCAGTCCAAATGTTG

>7710 len=172 tot-seq=1

TGCTCTTTCTGCTCCCATGTGGTATTGATGTCATTGGTACGATTTTGCTTGGTTCAGTCA  
AGTGAAGTATTTGTGTGTGCATCTGTCACATCAAATCTGGATTCAAACCTCAACATGGGG  
CCTCTCTATTTCTGCAACAATGTCTTCATTTTACACAATGGCCCCAAAAGC

>7711 len=172 tot-seq=1

CTACATGGCTTGGAGAGAGAATCTGTTACCTCGGGAAGAAAGAGCACTGTGGGACTTCG  
CAGTGAACCTCAGTGCTGCCCTGTCATGACAGAAAGCAACACTTGGCAGAAATCAGCTAAC  
ACCCACGTAGGGAACATTTAGATCAGCCCTAGCCAGAGAGGAATTGCCCATC

>7712 len=172 tot-seq=1

CAGACTCCCAGGCTGAAGGCTCCCCTCAGAAGAAGCCAGCTTCTCGGAAGCAAACAGTGA  
AGGTTTCTCCTGACAAGTTTCCAAGGGCTCCAATGACCCAAGGGGATGCCGCCCCAGGA  
CGACCTGTCCCTGCACCAAGCACAGCATCCTGGGCTGCTTACCCATGGGAAA

>7713 len=172 tot-seq=1

AGCGAGACCTTGACATTCCGGGAAACCAGACCCCCATTCTAATCGCTGCTGCTGGTACT  
GCGCATTCCAGGGCGCCGGGGACATGGGCACAGAGGGGCCTGTGCGACTGGATTTCTCG  
AATTCTGCAAAGAAAATGCACAGGAAGGACAATGGCATTGCTAAGTGGTGGC

>7714 len=172 tot-seq=1

GCCGACGCTTCTCAAGTCCTGCTGCCTGTCGGGGACACCTGCACACGCCCTCAAAGCCA  
CACTCAATTGTGCTGTGTGGGAAGCTTCTCAAAGCACCTCAGCAGGAACATTCCACC  
CTGCAGGCAAGCGCCTCTGCTCCTCAGCTTACATGTTTCGTGGAGGAACCTA

>7715 len=172 tot-seq=1

TTTTTTTTTCAAGCAGAAGACGGCATAACGAGATCGACAAGTACTGGAGTTCGGACGTGT  
GCTCTTCCGATCTCCTACGGAGGCAGCAGACATTTGCATAAGTAACAAGGAGTCAAATGG

TAATCCCCAAAACAATGGGGAAAATGTCTTCAGGACATGTCAGAAACATTTG

>7716 len=173 tot-seq=1

AACTTAGGAAATTAGTCTGAACAGGTTAGAGGGTGCGCCAGGGAAACGGACAGCTTCTGG  
GACGGGCGGAAGCACAGAGCCGCTGAGGCAGTACCCTTTGCAGGCTGCAGACAGCCGGCC  
ACCGTCCAGACCAGAGGACAGGTGTCCGCCTGGCTTGGGAGGCAGCCTCAGCC

>7717 len=173 tot-seq=1

CCCCATCAAGGTGGAGACAAATGACACATCTCAGTGTCTTTTAAAGTCCAGCTTAAGTG  
AAGACTTAGATCAATAGTTCTGCCTTGAGAGCCAAGCCTGCATGGTGCTCTGTCTCACCC  
CTGCCCTCTCCTTTCAAGACCATATCTCCCTCCAAGTTCAAATTCTTGCCAG

>7718 len=173 tot-seq=1

AACTTAGGAAATTAGTCTGAACAGGTGAGAGGGTGCGCCAGAGAACCGGACAGCTTCTGG  
GACAGGTGGAAGCACAGAGCCGCTGAGGCAGCACCTTGGTGGGCCACAGACAGCCGGCC  
ACCATCCTGACCAGAGGACAGGTGTCCGCCTGGCTTGAAGGCAGCCTCAGCC

>7719 len=173 tot-seq=1

GTGTGCGGGCCGGTTTCCTTCCCTTCCCTCTTTAAGCCATTTTTTGTGATGTACCCAG  
GTTTTGTAAACTGGTGGCAGAGTATTACGTAAAATGTAAAATTCTCCTTTCAATTGTGT  
TTGGGTGCACAATTCCGGGATACCTTCTTTTTCTTGCAAAGTTAAAATACA

>7720 len=173 tot-seq=1

AACTTAGGAAATTAGTCTGAACAGGTTAGAGGGTGCGCCAGAGAACCGGACAGCTTCTGG  
GACAGGCAGAAGCACAGAGCTGCTGAGGCAGCAGCCTGGGCGGGCCGCAGATAACCGGCC  
ACCATCCGGACCAGAGGACAGGTGTCCGCCTGGCTCGGGAGGCGGCCTCAGCC

>7721 len=173 tot-seq=1

GATCCATCAATGACTTCTTGCAGCCCTAGCCAAACAATCAAAGCAAATAGTCAGCTTC  
AAAAATCAATGTTTCGTGAGATGATGAGCCAACCAAGTGAGTTCTCGTGAGGTGGGATGGA  
AAGGAGAACTAAGAGGGAAAACAGAAACATTTTTTTCATACTACCCACCAAAG

>7722 len=173 tot-seq=1

TTGTTGACGAAGACAGAAATTTAACCATGGAAGTGTATATTACTTACTTTCAAGTCCC  
TGTAACAGAGGCAAGTTTTTTGTTTGTGTTTTGTTTTGTTTTATTTTGCTTCCAGGAGTCA  
GAGGGCTCAGCCCATTGCAGTGTGTGAAACAGACTGAGTAAAGAGATCACAAAC



>7723 len=173 tot-seq=1

TGGGGAATATTGCACAATGGGGGAAACCCTGATGCAGCGACGCCGCGTGGAGGAAGAAGG  
TCTTCGGGTTGTAAACTCCTGTTGTTGAGGAAGATAATGACGGTACTCAACAAGGAAGTG  
ACGGCTAACTACGTGCCAGCAGCCGCGGTTCTGAGATCGGAAGAGCGTCGTG

>7724 len=173 tot-seq=1

TCCTTGAAATATATTTAGAATCTGACATCTTCTCACCATCTCACCTGACTTCCCTAGAC  
CAGTCCACGAATCTATCTCACATGCACTATTGCAATAAACTGCCAACCAACCAGCTTTCC  
TGCTTTTACTGTCTCCCCTGTCCCCACTCCCAATCCATCCTCCATTAAGCAGC

>7725 len=173 tot-seq=1

AAACTATTCCAATCAATAGAAAAAGAGGGAATCCTGCCTAACTCATTTTATGAGGCCAGC  
ATCATCCTGATACCAAAGCCTGGCAGAGACACAACAAAAAAGAGAATTTTAGACCTATA  
TCCCTGATGTACATTGACACAAAAATCCTCAATAAAATACTGGCAAACCGAAC

>7726 len=173 tot-seq=1

CACGATCAGCTGGCGCAAAGGGAGGTAATGCTGGAGTATACGCCGTTGCCAGGGCCTG  
GAAGCTGGCGCCAGGCCAATCCCACCGCTGCCAGGGGGAAGTGGAGCGCCACGATCCG  
CAGGGCGGAAATGCCATTTTGC GCATCTCCTCGCCGGCCTCAAACAGGTCCA

>7727 len=173 tot-seq=1

CCTGTCAAGAGCACAGAGGAGACCCCCAAGACAAGGCCATGTGGGTGGCGGGGTGAGC  
CCCAGAGTAGCCGGGCCAGGCAGCTCCTTTCTCTCTAAGAGGCCATCTACAGAGTGGGAG  
AGGACCCCGCCATCCCTGCTGAGGGCATCAGGTCATCAGGGCCAGCTAGCCA

>7728 len=173 tot-seq=1

CGGGGACTCACAGCAAGTACAACTTCTGGTCGATGTACTTCTTGGCTATGTTTGGCTGG  
AAATCAGGAGACTCAAGGAAACGTAAGAAGAACTCATACACGAGCTATAGGGGAAAAGGC  
ACGCCACTGAGGGGATGTTCCAAGGACTTGCAGGCCTCCAAGTGCCCCACTC

>7729 len=173 tot-seq=1

CCAGGGGAGTTGATGTGGAAGATGCTCTAAGAAGCATCCCCAATTAGCAAGCCTCAGCCA  
GAAACTACCTACAGGGAGCAGGAGGCCCTAGCGGGAGGCAGCCACGCCTCATTATTCTT  
GTAGCAGGAAGGGACGTCCAGACGGGACTCCAGAGGTGATGGAAAGTGGGGGA

>7730 len=173 tot-seq=1

TGCAGATGCGTCCCCAAAACTTTAGCTCATGCAATGTCTTACGCCCAAGGAATGGGTAG  
TGAAACACACTGGGGAGGCTGCCCTAGGGACAAAGGGAGCCAAAGCATGTACTCTCCAGA  
GCCTGAGAGCTGCCTGCCTGGGGCTGTTGCCACTGACAGCAAATCCTTACCCC

>7731 len=173 tot-seq=1

CCGAAGGGAGGCAGCAGGGAGGAAGAGGGGGCAAGGGGCGCGAGCCGGAACCAGCCAAGG  
CGCGGGAGGGAAGACGGGCCGATGGATTGTAAACCTCTTTTGCCGGGGAGCAAGCTGTGC  
CACGTGTGGCGCAGCTGAGAGTACCCGGAGAAAAAGCATCGGCTAACTCCGTG

>7732 len=173 tot-seq=1

TTCCATCATCAGTCCGCAACATATTGCGGGGCATGGTAGCTCCTCGCCTTCACTGCTTT  
ATTCGTCACTGGATCATAATGATCATTATCACTGTGCGTAATCAGTACAGCATCTGGTGA  
CGGTATCTCACCTGGAAGTCCCGGAGGTTCTATCAGCAAGGGCATATCGAATC

>7733 len=173 tot-seq=1

CAGCGAGGGGTGCCTCCCGGATCTCATGGCCATCTGGGAATACCCAAGACAGACCCAGAA  
CGTGCAGCTGATGACCAGTCTCCAAGCTGGTGGTCTCACCGGAGCCACACACCTCCTTC  
TCAGCCAGCAGCCGCGGTATGCGTAGATCGGAAGAGCGTCGTGTAGGGAAAGA

>7734 len=173 tot-seq=1

CAGGTGAGAACAGGGAGGAAATCTGGGGCTACTCCGTCACCTTTGGCCTGGGTGACTGGG  
TGGACATTGATGCCAGGAACAGAGAAGAAATAAAGAAAATGTTAGAGGTGTTTGAAGAA  
AAGATAATCAATTGCACTACCACATGTTGGCTCTGAGGGAGTTGCAGAGTTCT

>7735 len=174 tot-seq=1

TCAGGTCACAGAGCTAGAGCACTGGTCAAGGAAACATGCTACCTCACTGCTTTTCTGACT  
GTCCCACCCTAATCCTGCCCCACCAATCCCGGGATACCCAGACATGGCTGGGCCGTTCC  
TGCCATCTGGAGTCTCCATTCCACACTCAAAGGTGCCTCGTCAACCGTGAGTA

>7736 len=174 tot-seq=1

GGCTATGTGTCTCTCTGGGATTGGTCAGTCTGCCGGCACTTTAAGGGGAGGGGTTGCACC  
GGAGGGGTTGGCGCCAGATTTGGGCTAGCACCTGTGCAGTGGTGTGTTTACGGTGACGA  
CGGTGTACCAGAGACCGACGCCATCTTTTAGGAGCCAGCTGCCTACTTAGGTCT

>7737 len=174 tot-seq=1

AGTAATCTCTCTCTGGACCAAGTCAATTAAGAGATGTTGACTCTCATACATGGGCTTA

GGGCCATGAGTACAATCATGGGTTTCATACCAGCACGGAGGTCTCAGAGCAAATTCTGACT  
CTTGTGAATAGCATATAAAGCCCTTGAATAGTAGAGAGACTGTCCTCATAGGGC

>7738 len=174 tot-seq=1

CACCAGCTCCCCTTCCGCCATAAGTGAAAGCCACCTGAGGCCCTCACCAGAAGCAGAAGC  
TGGCACCACCACACTTCTTGTACAGTCTGCAGAACCATGAGCCAATTAACCCTTTCTTTA  
TAAATTACCCAGCCTCAGGCATTTCTTTATAGCAACACAGACTAAGACACCATC

>7739 len=174 tot-seq=1

GAGAGCAGCTACATCTGTAGCTTCTCCTGGGTGGTAAGACTTGCAGCCAGGTCCAGCTTG  
GTGACCTGGAAGTCTCTGCGTGTGCCCCAGCCTGCTGTCCTGATATTATGGTGCAGTGG  
GACCCTCTCTGCTCCACCCCCAGGCAGAAATCCAGGCATGTGTAGGACCCTGGA

>7740 len=174 tot-seq=1

GGAGTAGAGAAGCTTAGAGGGGAACTAGCCCTCAGGCTCCCCCTGAGAAGACCGTCCACT  
TGAGAAAAGCAACCTTGGAGGAGCCTTTGTGCACATAGAACCTACTGGATTAAGCAGCTG  
GGAGACAGCCAAGGAGTAGGGGACAAAGACGGCTACATTGTTAGCACTGAATGT

>7741 len=174 tot-seq=1

AGCAGGAGGGAGAAGATGAGATGACATGAGATGGGGGAGGAAGAAGGGGCCAGGTCATGG  
AAATGAGGAAAATGTGTATGCCAAGTGTGAAGGGACAGTGCTCAGAATTCCAAGCCCTAA  
CTCTCTCAGCCCCATGTCCTTTCCACTTCATATCACTGTGGCTTAAACCCCCAC

>7742 len=174 tot-seq=1

TTGCTGCTTAGGATGGGGGCAAGTCTGCTTTCCTCTGTGTCTACTTTCACATGTGTAGTA  
GTTTTGGTGCAGGAGTGGGTTGCTGGAGGGTGTGGGGCTGACAGACTCTGTGCCTGCCAA  
AGGTCCAACAACAATGGTGGTGCAGCAGGGGAAGGCAAGGAAGGTGCACTTATG

>7743 len=174 tot-seq=1

CCCCCATGATTTAATTACCTCCCCTGGGTTCTCCCATGGGAATTGTAGGAGTTACAAT  
TCAAGATGAAATTTGGGTGAGGACACAGCCAAACCATATCACCATGCCTTGGGCCACTGC  
TCACACCCCCAGGCCCTCCTTTCTTCTCTGACCCTCAGCCTTCTACCCCTCC

>7744 len=174 tot-seq=1

GGGGGGCCGGAGGGGTAGGTGGGCGGCACAGCTGGGGACTGAGGGTGTGGTTGCTGTGG  
ACAGGCTTGGAGCCGTTTTTGGCTGGAGACTGCGGGTGGGAGAGAGCAGAGGGTCAGGAC

CCAGTGGGCCAGCTGGTCTCCCTCACCACCCACCTCAGGCTCCATCTTTGTC

>7745 len=175 tot-seq=1

CCTCTGGAAGAGCAGGCAGTGTCTTAACCGCTAAGCCATCTCTCCAGCCCCTTGTCTTC  
AACATCATGAAGGCTCGCAGGGCCTTCAAGGGACTGAATAATAGTTCTAAGACAGTCCCA  
CAGCGGGACATCCTGGGTCCTACATGTGCAGGGGTAGAAGGGTCAAGTATGACCT

>7746 len=175 tot-seq=1

AACCTTGAGAAATATACCTTTGGTTTGCCTCAGAAAAGTAACACATATTGCACTGTTAAG  
GTTTATAAAATTGGCATAAAACAATGTTGTAACATCACGATACCCGTTTTAAGAGTTCAG  
TAACTAACAGGAGCCACAGGACATACACAGAACTGCGGATGCTATCACACTTAG

>7747 len=175 tot-seq=1

CCTCTTCTGCTGCTGAGACTTTTGAACAGCTATCCTAGTCATGGGGTCCCTCCAGTCTG  
CTCCTCCAACATCTATTTTCAAGAAGGCAGATATTCATTTATTAAAGTATAAATCATGT  
CAGATAATTACTCTCTTCAGAATGAGCATTACTCATCATGCCAGTCACTCTAAGT

>7748 len=175 tot-seq=1

AGGTGTGAGATGATGACTAGAAGACGGAGAAGATGGCTATGGCAATGACATTGCATAACT  
GCTGTCGCTGCGGCATGCATCCTCCCATACCCCTGTGTTTGGTGTGACGCTGGGGTGAGC  
TCAACCCTGGACTTGGATGAATCAGTGCAGGGATTCTCAAAGTGTGATCCCTGGA

>7749 len=175 tot-seq=1

TGGGGAATATTGCACAATGGGCGCAAGCCTGATGCAGCAACACCGCGTGAACGATGAAGG  
TCTTCGGATCGTAAAGTTCTGTTGCAGGGGAAGATAGTGACGGTACCCTGTGAGGAAGCC  
CCGGCTAACTACGTGCTAGCAGTCGCGGTAATAACCAGATCGGAAGAGCGTCGTG

>7750 len=175 tot-seq=1

CAGCAGAGTGGCAGATGATGCAGCCAAGCCTCCCTCATACTGACCTGGTGGCTCCATC  
CAGCACTTCCCTCCAGACCTTCCAGGGAAACTTCAGGAAGCTTCTTGGGTGCCCCACCTG  
TACTTGCACTGCCAACATCACCCAGCTCATACTAGGCACTCCCTATGATC

>7751 len=175 tot-seq=1

CTGAGTTGTGAAACCGGGTAGCTTGGGAGGTGCAGAGGCTCAGAATCTGAGTTCAAATGA  
GGCAGACTAGGTTCCATCCCTGGGGGTAGGCTCCAGGGCCCCACATGGAGATGAGGCACA  
AGGACAAGCAGGGGCGAGGAGGTTCTTGAATGAGGAGAGTCCAGGGCTCACCC

>7752 len=175 tot-seq=1

GGAGGTATTTGCGGGGAGGTCCAGCAGCTGTCTTCTAAGACAGGGACACATGGGCCT  
GGTTATTCCTCTGTACATGTGGAACGGTAGGAGATGGAAGACGGAGACAGAACAAGCA  
AAGGAGGGCCCTGGGCACAGAGGTCTGTGTGTGTAGCCATCCAAGCCACTGGACC

>7753 len=176 tot-seq=1

CAGGAGGCAGAAGCAGGCGGATTTCTGAGTTCGAGGCCAGCCTGGTCTACAGAGTGAGTT  
CCAGGACAGCCAGAGCTATACAGAGAAACCCTGTCTTGAAAAACAAAACAAAACCAAC  
CAACCAACAACCAACCAAAAAGCATGGTGATCATCCCGGGACAGCTGCATTCCCA

>7754 len=176 tot-seq=1

GCCACCACAGGAGACCCTTCTGTGAGCTGGCCTGAGCTCAGGCACATGCTGACCAGTAAG  
CTCAGTGTTTGAGCTGTTGGAGTCTGGGGTAGAGAAAGGGTGGCTCTGGGGTCCCTTCT  
CTGCCCCCTTTCACCTGGGTACACCCTGGGTCTTTTCTCAAAGCCCAGCCCAGC

>7755 len=176 tot-seq=1

CCACAGCATGGTGTTTCATTCATGGTGCTGAGGCCAAAAGTACCACACAGTGAGGGCGTTT  
GTTTGGGATGCCCTGCTACTGTCTTCCCCGTGTCTGATCAGAATAACAGTGGCTATTACA  
CTTTCTGTTTCCTTAGCACAAAGGTCTATTGCAGATGAAACTATGTATACTAGGTG

>7756 len=176 tot-seq=1

ATAGTTCATTCTTATTTTCATGGGTTAGGAATGCTGCCTGCTAACCTTGAACCTATTTTCCC  
TTCCTGAGATATGGCCCAACAAGCTGTAGCAGGCAGAACCACTGCTGATAATCACACAA  
CTTATAGAGGTTCTGCCTCCCTAGAAATCAGGTTTTCACCTGCAGCCCAGGAATTCT

>7757 len=176 tot-seq=1

CACCCACGCACACATTCATCCAAGACCTACTTCTACTATGGAGCACTGCGCTATGTTCT  
GGGAACACAGAAATGACCAAGCTAGGTCATCAGCTCCCGCCTTCAGACCATTTGTCTGGA  
GGGCATGAAACAGGTGGTACATGTAAGGGAGGATTGCAGCCGCTCACAAGCTGTAG

>7758 len=176 tot-seq=1

GGAGATGGGTGATCAAATCCACCAATCTTATCAATAAATGAGCTGAGGATGTAACCTCAGA  
GTTAGAGCACTTGCCTGGTGTGCTCCAGACCCTAACTTCAATCCTTGACACCCAAAACGA  
AACCATAGAATTGGACAGAGATAATTTTTATGTCTGAGAGATCCTATAACAAAGTA

>7759 len=176 tot-seq=1

TCAAATATTATTATAATTAGCTTTTAGTAAATTATGTTTTGTGTATTTGTGTATGCATGT  
AGAGGCCAGATATCAGTGTCAAGACCTTGGGTGGCTTCCTCAGTCCCTTGCAGCCTTATT  
GCTTGAGACAGTCTCTCTTGGGTCTGAGGCTCAGCAATTCATCTAGACCAGTTGG

>7760 len=176 tot-seq=1

AGGAAGCCTGAGTTGATGTGGGTAAAGGATGTTTGTAAACAGAGGAAACCAAAGTGCAA  
TGTCTTGCCTTGAGAGCATGATGGTTTTGATGAAAATATTTAATGGGTGTTTGATGAAAA  
TGAAGGAGAACGATCAGTTTAGAAAAAATAAAAAGGTGAGATACATATCAAATCGC

>7761 len=176 tot-seq=1

TAGGGAATCTCCGCAATGGACGAAAGTCTGACGGAGCAACGCCGCGTGAGTGATGAAGG  
ATTCGGTTCGTAAAGCTCTGTTGTTAGGGAAGAACAAGTGCCGTTCAAATAGGGCGGCA  
CCTTGACGGTACCTAACCAGAAAGCCACGGCTAACTACGTGCCAGAAGCCGAGGAA

>7762 len=176 tot-seq=1

TAAGGGAGGAAGAAGTAGGGAATATTCGGCAATGGACGGAAGTCTGACCGAGCAACGCCG  
CGTGAGTGAAGAAGGTTTTAGGATAGTAAAGATATGTTGTTAGAGAAGAAAGGGGGGAGG  
AGTGAAAAATATAAAAAGTGACGGTAACTAACCAGAAAGGGACGGCTAACTACGTG

>7763 len=176 tot-seq=1

TAGTGAGGTGCAGAGAGCATTTCTGTGGTCTTGGGAGAGAGAGAGCCAGCAACTGTGAGA  
CATTGAACTTAGTGCTGCCTTTATTATAGCAGAAAGCAAACTAGACAAATTCAGTTGAT  
GCCCACTCATGTAGGGAGCATTAAACTAGCCCTAGCAAGAGGAAAGTTGCCACC

>7764 len=176 tot-seq=1

GGGTTTCTCAGCAACCCTGCATGGGGCCAGCACTCAAGCCACCAGGCCACCTTTGTGAG  
ATCTGGGAAGAAATGCCCCTGGGAACAGAGGCAGCCTTGCCTGAGGGTACTGACCTGGTG  
AGTGCAGAGTGAGCTGGATTTAGCCACCTGCCCTTACCTGTGTGTGTCTGTCC

>7765 len=176 tot-seq=1

TGAGGGGGACAGCAGCCACGGGGATGGCTCTGAGTTGACGATGAAGGGATGCAGAGCGA  
TGACCCGGGCGCCTACAGGAGCGAGAGGGGCAACTCCCGAATAAGCGATGCCGGCCTCAA  
GTCAAGAGAATCGAAAGGGGACGATGAGGAGCAGGCAAGCACCCAGGATTCCCATG

>7766 len=176 tot-seq=1

GCCCCGCGCCTGGCGGCCCTTCTGCTGCAGGCTGCCAGTTGCCCGAGTGCTGTGTCCA

CCTGGCCACTCCTCTGCCTGAGCTGTCACCCCTCCTCTCCCTAGGGTATGCACCACGTGG  
TCCTTGACGGGCACCTGGAGGCCCGAGCTGCCCCCTGGCTCCCAGGGACCCTGGC

>7767 len=176 tot-seq=1

CAGTGGGCAGCTGAGCCAATGCTAACAGCTGCCTTGTTATGGGAACTGAAGAAAATGAAA  
CCACCCAATTGTTAATGTCACTGTTGGTCACACCTTTTGTACGGTAAGCTGACAGCATT  
TGTCACTGAAGCGGTAGGACTCCTAGCGCAGTGCTCTTCCCACTGTATAACTGTTC

>7768 len=176 tot-seq=1

GACGGGAGGCAGCAGGAGGGAAGCGGCGGCAAGGGGGGCAACCCGGACCGAGCAACGCCG  
CGTGAGTGAAGAAGGTTTTCGGATCGTAAAGCTCTGTTGTAAGAGAAGAACGTGTGTGAG  
AGTGGAAGTTCACACAGTGACGGTAACTTACCAGAAAGGGACGGCTAACTACGTG

>7769 len=177 tot-seq=1

TGCTGACCTGTCAACATGCTGGAAAAGAGCATGGCTGGGAAGTAGTGGTGGAAAGTAGAGG  
ATCCGGCCCATCAAGAAGAAAGGGAAGTAATGGAGCATCCATCCCAGGAGCAGCTGGCCA  
CCTCCTCGCAGCAGCACCTTGGTCAGCCCTGTGCAGCCCAATCAGCACAAACCAATC

>7770 len=177 tot-seq=1

CAAGGATGCTGTGCCCGAGTACTTCAACTCAAACCACACGGAGACGAGCTTTGACGGGCG  
CTCTGATGACAAGGGCCCGGAACCCGAGGGGCTGACACTGGGGACGATCGGCGATAAGAC  
GTACGCTTTCATTGGCTTGGAGCGCATCGGTGGCATCATGGTGTACGACATCACGAA

>7771 len=177 tot-seq=1

GCGCGCGCATAAACTAGAAAACTAGAAAACTAGAACTCTGGCTCTTCGTCTGATCCA  
CCAAAATCGGAGCTAGCTCCAAACGTTGCAAATCCGCCGTTTGATGGAGCAGAAGCACTC  
CACGGGTCTTCAACGTTTACGCCCTGATTAGCGCCATTTTGCGCATTTCATTCCAGCA

>7772 len=177 tot-seq=1

GGAAGACAAGAGGCCACCAACCTCAGGGAGAGGCTTATAGGGGGCAGGCTGCAGCATGAC  
CTTGAGCAAGATACCTCATCTATAAGCCCAACAAGGGTCTGGTTGCCAGGGACAGCACC  
GTGAGGGAACCTCACGGCTGCAGCTCTGGGTCAGACGTGGCCTGGGGCCAGCTCTGA

>7773 len=177 tot-seq=1

AATGACCCTGATCTACTTTAGTTGTCACAGTAGTTAATGTCATTTCAAATAAGGGAATA  
TGTAGTAATAAGAGCTAACATTTATTGAGTGCTTACTATGTTCCAAGAATTGTGCCAAGC

ACTTACTATACTCATGTGCTCATTTGATTATCTCCATACCTTGTGAAGAATGATAAG

>7774 len=177 tot-seq=1

CAAATATTATGAAATCTAGACGGAGAGATAGAGACCAATATAATGATAGTTGAGCACTTC  
AATATCCTACTCTCAGCATTGGACAGTTCATCTAGATATAAAATCAACAAAGAAACATTA  
GATTTAAGCTGCACTTTAGACCAAATGGACCTAACAGTTATTTTCAGAATATTTTCAT

>7775 len=177 tot-seq=1

CGGAATCCTTTGAAATGAGCTGAATAATAGCAATGTTTGTGGGGAAGGATCCTCATTTTA  
CCCCAATTCCTATTACCACTGTTTCCTTTCCTATGCTTTTCTCTTCAGATTGCCTCTTTG  
CTCTGGAATCTGTAACATCCTTCTTTGTGAAATTATTTTTCTCTCTCTCTTTTATAG

>7776 len=177 tot-seq=1

GGGGCCTGGGCAGTGATGGCCACAGGGCTCCCTGCTCAGAGGGACCAGTGTGAGGGCCCC  
AAGGAGGTGAAGAGACTCCCAAACAGGTGGCCCCAGACCCACAGGGCCCAGCACTGAGC  
TGTGTTGGGTGGGGCGGCGGCCACCCACATTGCCTTGCTCACAGCTCCACGCGGTG

>7777 len=177 tot-seq=1

CTTCGTAGACTACCGTCGGCGCGGTGGTGATCAGGTCGAGATCGTATTCACGCTCCAGAC  
GCTCCTGAATGATCTCCATGTGCAGCAGGCCGAGGAAGCCGCAGCGGAAGCCGAAGCCCA  
GCGCGGTAGAGCTTCCGGCTCGTAGAACAGAGAGGCATCGTTAAGGCTCAGTTTGC

>7778 len=177 tot-seq=1

TGGGGAATATTGCACAATGGACGGAAGTTTGATGCAGCGACGCCGCGTGGAGGGTGTAGG  
CCTTCGGGTTGTGAACTCCTTTTTCTCGTGAAAAGGCATGCTTTTCGGTATGTAAAGCT  
CTATCAGAAGGGAAGAAAATGACGGTACCTTACTAAGAAGCTCCGGCTAAATACGTG

>7779 len=177 tot-seq=1

GATACGGTAGTGACTGGAGTTCTACGGGAGGCAGCAGTGGGGAATATTGCGCAATGGGCG  
AAAGCCTGACGCAGCGACGCCGCGTGCGGGATGGAGGCCTTCGGGTTGTAAACCGCTTTT  
ATCGGGGAGCAAGCGAGAGTGAGTGTACCCGTTGAATAAGCACCCGGCTAACTACGTG

>7780 len=177 tot-seq=1

CATTTTACAGCACATAGGAGGGAGCAAACCTTGCAAAAATGGATCGATAGAGACTGCTTA  
TTGAAAGAACCTTGAACAAGCACATGTGTAAGGATTGAGAATGTGGTGTCTGAACTGGCA  
GCATGTGCCAGAGCAGCACAGACCTCCAGGAAAATGAAGAGAGGAAATCGAGGTC



>7781 len=177 tot-seq=1

TCTGTGGGGAAGGAAATTCCTACTACGTGCCACATTTAGGGCTTGTAACAGTCCGGTCTG  
TGAAGTGGGAGCTGGGTAAAGGGGAAAATGTTGGCTATGTTCTCATAACAGCAAGTTAC  
ATTTAAGTTAAAATTCAAAGCACAGCACACGTGAGCATGCCAAGGCCCTTCTCACT

>7782 len=177 tot-seq=1

CCCAGTCCCACCCCATCTCCACCATTAATGCCCTTTTTCACTAAGGACCCTATTCTGAGC  
AGTGACCCCAATCCCAACACAACCTCACCAGTAACACTTGCTCCACCTCTTGTCATTA  
GTAACCCCAACTCCCACCACAGCCCTCATTCTAGAAGTGACCCATCCCCACCCCGT

>7783 len=178 tot-seq=1

CAATAATTGGAGACTCAGGGAGCAAGGCACATAGAAGTCTGAAGACAAAAACCAGGTA  
CGGACAGAGAGCAGCCATTATTTAAATTTCCCCTGGCTGACAGATTGGAGAGTGAGTGG  
GCCAGACGCCGCTGGGAAGAGATGAAAAGACTTCATTTCTTCTGCAGATAAACATA

>7784 len=178 tot-seq=1

GACTGTTAGAAGCAATACATGTACATTTTTTAAAAAATGGAGCAAAACACAAGCTTGGGT  
TGCAGCTCAGTTGGTAGAGTTACTGGATAGTGAGAGTAAAGACCTGGGTTTGGGGTTGGT  
GAGATGGCTCAGCAGGTAAGAGCACTGGCTGCTCTTCAAAGGGCCCAAGTTCAAATC

>7785 len=178 tot-seq=1

GTGTGCATCCCTTCACTGAATAGCTTGTGAGGGGAACCCACTCTCTACAGCACAATTTCA  
GGATGGCACCAGCTCTAGGTAGAGCAGGGGCTTTATATTCGTTGTCCATACGTCCCAGGG  
AACTCTAACGACTCCCCTTCCCCACTGTCCCGCACGTCCAGCCTCCCATCGTCTCCGT

>7786 len=178 tot-seq=1

TGGGGAATATTGCACAATGGGGGAAACCCTGATGCAGCGACGCCGCGTGGAGGAAGAAGG  
TCTTCGGATTGTAACTCCTGTTGTTGAGGAAGATAACGACGGTACTCAACAAGGAAGTG  
ACGGCTAACTACGTGCCAGCAGCCAATAACAAGATCGGAAGAGCGTCGTGTATGGGGA

>7787 len=178 tot-seq=1

CCACTTAAGTGTCTTGTCTCAGAAGGCTTCTGAACCCCGGCAGCTTCTGCTCTCTGGA  
CCAGCTTCCCCTGCAGAAGGATTGGTCTACTTACCGAAGGTCCAGGTTCCCTGGGCAGAA  
CGAGCTCTGGTGCCTCAGAGGGCACAGGGGTTTGTGTCCTCTGGCAGCGTTCCCATC

>7788 len=178 tot-seq=1

CTTGCCGTGGCAATCACCATAAAGGGAAATATACACTGCAAAGTCAGGTATGAGCTGAG  
CACCCAAGAGGATTAGTAGTTCAAGGACTGCCTTGGCTATGTAGTGAGTTTGAGGTCAGG  
CTGGGCTACATGGGACCCTGTCTACGAAATCCTGAACCAACTACCACCACCACCACCA

>7789 len=178 tot-seq=1

ATGTTGGGGAGGATGTGGAGAAAGAGGAACACTCCTCCATTACTGGTGGGATTGCAAGCT  
GGTACCATCACTCTGGAAATCAGTCTGGCAGTTCCTCAGAAATTTGGACATAGTACTACA  
TGAAGACCGAGCAATACCTCTCCTGGGCATATACCCAGATATTCCAAGTGGTAAGAAG

>7790 len=178 tot-seq=1

CCTCTATAAGTAGCTTAGGCTGGCCTTGAACCTCCTGACCCTCCTACATTCTCTCCCAGG  
TGCTGGTATTACAGAAAACATTCTTTTAGAGAAAAACCAATGCTCGGCTGGGGAGGTGGC  
TCAGTGATTAAGGGCACATAGTGCTCTTTCAGAATTCAGAGGTCCTGAATTCAATTC

>7791 len=178 tot-seq=1

TTCTGTCCAGGGAATTCATCAGGGGAACGGGTGGGTCACAATAGCCACGGGCTCATCCA  
CAGTGCCACAGTGCACAGGGTACGTGGGCAAGGGCTGCACCTGTCAGCACCCTAGGCACA  
CCCCGAGTCTCCAGGCAGGGGTGTATGCACAGCCCTTCACAGTGGCAGCTCCATACCC

>7792 len=178 tot-seq=1

CAGGGTCTCCTTTGCTCCCCTGCGGGGGCATCCCTACCTTGCCTTCACTTCTGGACATC  
TGCTTCTGGTTTTTTTTGCTCCTTCTCGTTTTTCACAGCAGCTGCACTTCTGTTCTTCCC  
CTCTGGCTTCTTGAGGTCTTCAGGCTCCCCTTGTTCATTTTTACCGACTTTTTCTTCA

>7793 len=178 tot-seq=1

TTTTTTTTTTCAAGCAGAAGACGGCATAACGAGATAGTGGGGTACTGGAGTTCAGACGTG  
TGCTCTGCCGATCTCTACGGGAGGCAGCAGTAGGGAATCTCCACAATGGACGCAAGTCT  
GATGGAGCAAGCCTTTTGGGTGAGTGTACCTTTCGAATAAGCGCCGGCTAACTACGTG

>7794 len=178 tot-seq=1

GGGTGATGTTGTTTCAGTTCTGAGTCCAGGAAGCAAGAGGCCAAGTGTGCTTCTGCCAGC  
ACTTTGGGGTTACTATCCAACCCTCATAATGCTACCCACTGGAGGATGAGAGACTGTGTG  
GAGGAGAGAGGAGCTACCACAGCCAAGACCATGCAAGATCCAGAAGCCTCCAGCCGAC

>7795 len=178 tot-seq=1

GGAAACAAAGGTACTGCACGTTCCATCCAGATGATTCAGCAAAAAGTACCCAAAAGACAA

AAGGCTGCAGACAGTCTACATCTGGAGGACAGAGCGACAGACTTCGGTTCAGGATCAGG  
GGAAGGAGCAACCTGGCTGTCCAGGTGCACAGGCAGAAAGCTGGCATTGGCAGCCTT

>7796 len=179 tot-seq=1

ATGAGTACAACCTCAGACTGTTATGCTCAGCATCATGCACAAAGGACCAGGACGGGTAAC  
TCTCTCAAGACTCTGACATGACTTCTTTTTCTCACAGTTCCTTCAACCATAGCTGGTAA  
ATCTTGACTCCCTTCAACTCTTAGTCCATCCATACCTACTCTGGTCACAGCCATGG

>7797 len=179 tot-seq=1

GGCTCCTGGCCACCTCTCCTGCTTACATCCTTCTCTCCATCCATCTGCTTGTGATTTGG  
GCTCCTTTTGAGAGTATATGAAAATAAGATCTGTAGACAGACTAAGTTTGGAAAAATCCA  
GTGTGTTTTATGATCATTAAAGTCATTTTCTGCCTTAAAAAAAATTAAGTAAATCTAAC

>7798 len=179 tot-seq=1

GAATAACAGGAGAAGTGGGGCTATGCCAGCTGAGCCTTGGTCAGAAGTTGAGTTTAGTT  
GCCTGGAACCCAGCTGTGGAACCTTCTATTTAGGAATGAGGGCCAGGAATGAGGGCCAGA  
GAGCAGAAAGGAGCCAAAGAGGTGGGCAGGGTAGCCAGACAGACCCACCACATAGGATG

>7799 len=179 tot-seq=1

AAGGCCAGGCAGGTGGGCAGTTTTTTGGGTCCCTGGGCAGCCAGCATGGTTTGAGTGATG  
GCATCAATAGCGGTGGGAAAACACTCTGGGTCCCAAGTGATATGTGCTGATGTTGGCTAT  
GACTGTTATAAGCTGAATTGGCCAGTCTCTGAGCCATAAGTAGCATATACATGTAGGT

>7800 len=179 tot-seq=1

CATCACATGGCTGGGTGAGACTGTCTCCCGGGCCCTTCTCACTGTGAGCCCCATGAGC  
AGGGGGAGCAGTGACCCCGTGACAGTCCCGGCTGTCAGCTCCAGTCTTGGCAGAAGTCT  
GCCTCACACCCTCGCTCAGGGCTTTCTGTCTGTCTGAAGCAAAAGCCCCATGTGAA

>7801 len=179 tot-seq=1

CGTTTGCATCTCCACCTCGTCGTGGTGAGCCGCGATGGCGTTGCAGATATCCGGCTTCTC  
CTTATATTTCTCGGCCAGCTTGGCGCCATACAGCGCGTGGGGCAGCTCGCTCTCCTCATC  
AGGCACCTTTCCGATGTCGTGCAAGAGTCCGGCGCGTTTTGCCTTCTTGGGGTTGAGCC

>7802 len=179 tot-seq=1

GCAAGGAGAACAGATTGGGCAGTTACAACCACAGGAGAGTAAAACAAATAGTTCCATCAG  
GGTGAATTTTTGAGTGAACCTTCTTAGAAAACACTTGTTAACAGCTTTAAAGATAGTTT

ATTGGAAGATAGTTTATTGGAAAATATGCAGCAGGAAAATTAATGTGAAATAGACTCTT

>7803 len=179 tot-seq=1

CCAGTAGGGGCTGATAGACACCTTATACAGGAGAGCTCTGGCTGGCATCTGGCAGGTGCC

CCTCTGGGACAAAGCTTCTGGAGGAAAGATCAGGCAGCAATCTTTGCTGTTCTGCAGGCT

CTGCTGGTGACACCCAGGCAAACAGCATTGGGAGTGGACCTCCAGCAAACCTCCAGCAGA

>7804 len=180 tot-seq=1

CAAGCCAGGCCAGGTGGAACGAGCAGAGGTCCTAAAAGTCAACCACAACCCAACAACCCA

ACAACCACACGAAGGCTCACAGCCATGTTAGCTATAGTGTGCTCACATACATAAAATAA

AGAAGTAAATCTTTAAAAAAGGAAAAGAAAACGCACAAAGTCATTCAAACCTGTAGTCT

>7805 len=180 tot-seq=1

GAAGCTCAGAAGTGTATCATGCTGCTCAGACAATATGTTCTTTAAGATGGGTAGAGAGA

GGGTCAGATGGTGCTGATACTGTTCTGGTGCCAGAGAAGCCACTGGATCGGTGTGGTCAT

CAGCATAGTCTCACCAGGTGCCAAGGCAGAGGACACTCCAATCTCCCATCTTCAGTGTG

>7806 len=180 tot-seq=1

GCTGGAGTCTGAGGATATAAGGAACCAATGGAAGTCTCCTGGGACCCTCACTGCACTGG

TCACTTTCCTAGATGACACATGCCCTCTGTTCCCTCAGCAGGACATCTGGGCAAAGTAG

TCCCTCCTTCAATAGACTCACGGAAGTTATCTGCTTCTCTGGATGTGTGATGCATTAA

>7807 len=180 tot-seq=1

GAATGGGAAACAGAATAGACCCTCACCCACATCAGGAAAAAAGCAGTGGTCCCAGCAC

TGGGAATCTCTTAGGTTGGCACAGACAACAGTCGTCAGAGGCACACAGGAGCTGGTTTCC

TCCCGTTTGCTAGGAACCCAGGCTCCTACGGGCCATGGTACCCTCCATGCTGGAAGAGC

>7808 len=180 tot-seq=1

GCAAGAACTATTGTCACTAGGTTCCAGATGAGATGTTGCTCAGCTTCATGAAGGCTTGT

TGCCCTGGTGTAGAGGTGTACTIONACCAGGTGGCCTCCTGCTGTCAGCTCCTTTATCTGAG

GTGTGCTTCAGCAGTAGAAAAGCCACCTGACCAGGTCCGCTCTTCTTAGAACAGTTAGCAT

>7809 len=180 tot-seq=1

GTGACAGACAATCAGTAAGTGGCAGATATTAGCTCACTGCAACCCAGTACCCTCGACCT

ATGGGTGCACAGTACGGTCCTCACGATAGCTATAATTACTCGCTTTCTGGAGTTGCCTCT

ACTTCTCGATTGCACAGGTGCAGTGGGAGCATTGACTAATAAGAGCAGCCAGCAGATTC

>7810 len=180 tot-seq=1

CTGCCCTCCTATCTAATTCCTGACTCGGCAACCTCAGCCACTGTCCCCACAGGCCTTTT  
ACTCTGAGACCTTGGGCACACTACCCAGCTCACAGCTCTCTACTGTTGCCAATGTGTGG  
TTTGTGTTGTTAGCTCCCTCCTTCTTTCACAAGGAAGACAGGAGAAGACCCCTGCTCCC

>7811 len=180 tot-seq=1

TGGGGAATATTGCACAATGGGGGAAACCCTGATGCAGCGACGCCGCGTGGAGGAAGAAGG  
TCTTCGGATTGTAACTCCTGTTGTTGGGGAAGATAATGACGGTACCCAACAAGGAAGTG  
ACGGCTAACTACGTGCCAGCAGCCGTAATACGGAGATCGGAAGAGCGTCGTGTTGGGGAA

>7812 len=180 tot-seq=1

TGGGCTGCAGGGCGCTGCGGGGACCCTCCATCAGGCACGCTCCCTTTTGTGATGCTCGG  
TGGATGCACCAAAGGAGCAACATCCCTCAAAAAAATTTTTTTTTTAAGTCTTCATTTT  
GACCTTGAACCCTGATGTCATGGCCACCTCCAGGGAGTCAGCTGTGAGAGCAGTCATTC

>7813 len=180 tot-seq=1

TCCAAAAGTTTGACAAATGCTGCATATGAAAACCTTCATGGAAATTCAAAAGCATACT  
TGCCAACAACAGTTTCTGAGAAGCCAAAGGGAAGGATAGATAAGCCTCTTTAGCTTCATC  
TTACCCAGACTTTCCAGGCTTCTTTGATTATCAAACCCATTTTTTCATAACACATATTAG

>7814 len=180 tot-seq=1

CAGGTGGCAGGATAGGGCAGGGGAGCGAAACCCAGGGCGCCCTTGGGAGGAGCCCAAGGA  
CGGAGGTTGTCTTCTCCAGGCTCCAACCTCCAGAACCAGGAGGTCTGGGGTTCCCCAAA  
GCCCCAGCCTCAGTTTACCCCCAGTGACCAGACGGTGCTGCACAGACCACTTTATTTGA

>7815 len=180 tot-seq=1

TGGGTCAGGCTTTCAGGTGGGTTTATGTGCCTCTGGGTGGTGTGCACAGCATTGGTGATG  
GCAGTTGTGATGTTAGGTCAACCCTCAGGCCTGCAGGCAGCACATACTGGCACCAGCAGT  
GGCCACAGCAGACTGGCTGATTTAGTCCCCAGGCCCTCAGGTGATATGTGCATGTTGGTG

>7816 len=180 tot-seq=1

ATCCTTAAACCCACGTGCCTTACATCAGGACTAATCCTGGACACAGGCTGGAAAGCATA  
GCCTACAGGTGGTGAGGCAGGAGGAGTGGGCTCAGCTGTGAGAAGGAGAAGGAAATATGG  
CTGAAAACCTAGATAGGGGTCTTGAATCACACCGAGGATTTGGGCCTTTGCTGCTATCTG

>7817 len=180 tot-seq=1

GTCTTGTCTGGTTGGGCAGGAGACCTGACCACACAGGTCAGGCCTCACAGGTCCTTCCCC  
GACAGAGGAGACCCCGTTTGAGGTGGGGATCCGAGTGCAGATCCACAGCCAGGAGGAGCC  
GCCCATCATCGATCAGCTGGGCTTGGGGGTGTCCCCGGGCTACCAGACCTTTGTTTCTTG

>7818 len=180 tot-seq=1

AGAGGAATATTCGTC AATGGGCGAGAGTCTGAACCAGCCAAATAGCGTGCAGGATGACGG  
CCTTACGGGCTGTAAACTGCTTTGGTTTGGGAATAATCGACATTACGTGTAATGTTTTGC  
ATGTACCATTCCAATAAGACCCGGCTAAGTCCGTGCCAGCAGCCGCGTAATCGATAGATC

>7819 len=180 tot-seq=1

TGGGGAATATTGCGCAATGGGGGAAACCCTGACGCAGCCATGCCGCGTGAATGATGAAGG  
TCTTAGGATTGTAAAATTCTTTCACCGGGGACGATAATGACGGTACCCGGAGAAGAAGCC  
CCGGCTAACTTCGTGCCAGCAGCCGCGGTATAAGCAGATCGGAAGCGCGTCGTGTAGGGA

>7820 len=180 tot-seq=1

ACTTTGACTATACATGGAGCTACAGTGATGCTCCCTGAGCAAATGGGCAGAATTCAGACT  
TGCCACATGAATTTCCATTTCTCTGTCTCCTCCACCTGAAAACCTGTTCTGCCTT  
TGTCTCCCCTCTGCCTAAGTACCCTGGGACTTTAGTTCTCTAGGCTGATCCTATAAACTG

>7821 len=181 tot-seq=1

TGGGGAATATTGCACAATGGGGGAAACCCTGATGCAGCGACGCCGCGTGGAGGAAGAAGG  
TCCTCGGATTGTAAACTCCTGTTGTTGAGGAAGATAATGACGGTACTCAACAAGGAAGTG  
ACGGCTAACTACGTGCCAGAGCCGCGGTAATGTAAAGATCGGAAGAGCGTCGTGTGGGGA

A

>7822 len=181 tot-seq=1

TGTTTAAGGGCAGGATCTGGTTTGCTTTAGAATAGAGTTTTGACAAGTCGTTTGAACTTT  
TCATATTCCTCGATGAGAATAATAATAGTTTCAACCTCATAAGGATGCTCTAGGGATTT  
AAACAGATAAAGTTTAGAAAACGTCTGATACGGAGGATGGAACCAAACAAGCTCCCAGTA

C

>7823 len=181 tot-seq=1

TGGGGAATATTGCACAATGGGGGAAACCCTGATGCAGCGACGCCGCGTGGAGGAAGAAGG  
TCTTCGGATTGTAAACTCCTGTTGTTGAGGAAGATAATGACGGTACTCAACAGAGAAGTG  
ACGGCTAACTACGTGCCAGCAGCCGCGGTTAATCAATAGATCGGAAGAGCGTCGTGTTGG

G

>7824 len=181 tot-seq=1

TGGGGAATTTCCGCAATGGGCGAAAGCCTGACGGAGCAATGCCGCGTGAAGGTAGAAGG  
CCTACGGGTCATGAACTTCTTTCCCGGAGAAGAAGCAATGACGGTATCCGGGGAATAAG  
CATCGGCTAACTCTGTGCCAGCAGCCGCGGTATACCAAGATCGGAAGAGCGTCGTGTATG

G

>7825 len=181 tot-seq=1

CAGCAGCAGCAAGTCTCAACCAACACCCTAATTACAGCGTAGCCAACAGAAAAGCTGTAA  
CATTTATATGATGTGTCTTCAGGTGCCCGGAGTCACTGGTTACAAATGGGAGTGATCCAC  
ACCTCTGGGAAGTCTTAACAATGTCACAGCCTTTTAAAAATATGCCCTTTTGTTCACA

A

>7826 len=181 tot-seq=1

TTGTGTCCCACATAGGGCACAATGTAGTTAGTCAAGACAACCTAATGCTACATCTTCC  
ATTAGTGCAGTCTAGGTTCCACTCCCAGGAGAGCAGGGTCAGCTCCAGCTCTCTGGGCCT  
TTGGGGGAGGAGCTGGTGGGTTCAAGTTTTCAGAGCTGCTGAATTCACCTGGACCCAGAG

G

>7827 len=181 tot-seq=1

GCAGGCACACCAAGCTAGTAAATATCAGAGACTCAGGCACTTTTAATCTTTCTTGTGTCAT  
TATTCTCAGGTTGTAGTTTTATCCTTAAAGTCACCTCATGAGCACAACATAATTGCTAG  
AGTGAAATCTATCACATCAATATTCCAGGCAAGAAGAAGGAAGAACAAAAGGATATCACT

C

>7828 len=181 tot-seq=1

TTCGGCACAACCATGTCTTAGACCCGTCAAACTGCTACGGAAAGGACTCAGTTATCAAAG  
TACGTTCTGTCAATTCACAAATATTTTCATCATCCCCTGTGTAAGAAGTACTATAATTG  
TACTATGAGAGAGACTCAAAGAAATAGATTGTATGGTCTCCGCCTTAGAAAGACTTATA

C

>7829 len=181 tot-seq=1

TTTCAAAGCCATATGGAATGGGTTTTGTCATTCATTATTTGGATTCTCAGGGTGGTAT  
TCCCCTCACACTCCTCACTCCCACCCCTGGGATAATCAAGAGTCTAATATTGACTGAA

AGGAGGCCTTTGTAGAAAAGCTAATGAAGTCATATGGAGTTGCAGGGCTCTGCTGCCTTC  
C

>7830 len=181 tot-seq=1

ATCCAGAACGGAAAAGTAGTGTGGACCTATAACAAGGTAAAAGGATATGTAGAAACAAAG  
CCTTTGGTTACAACAATCAAGTAATCTTCGGTGCATGGGACAATACACTTTACTCGCTGA  
ATCAAAAAGAACGGTCATGAGAATTGGCGTTGGACGGCAATCTCACTCGAATGCACTTTT  
C

>7831 len=181 tot-seq=1

TGGGGGATATTGGACAATGGGGGAAACCCTGATCCAGCGATGCCGCGTGAGGGAAGAAGG  
TTTTCGGATTGTAAACCTCTGTGGACAGGGACGATAATGACGGTACCTGTTTAGAAAGCC  
ACGGCTAACTACGTGCCAGCAGCCGCGGTATACATAGATCGGAAGAGCGTCGTGTAGGGA  
A

>7832 len=182 tot-seq=1

TTCAAGAATGTGCCGCGAGCTGATCAATCCTGGAAGCTGGTGTCTCAGCTGGACTTCAGT  
GTATGCTGGAAGCCTGAAGGAGGCAGCTCTAATGTTCAGTGAAAGAACAGACCTGCCAGCG  
AGAGTGAGGGCAAGCAGGCACAGAGAGCAAGCTTCAGTCTTTGCTCATATTTATAGAGGT  
TG

>7833 len=182 tot-seq=1

AAAAAAAAAAAAAAAAAAGGAAAAAAGGAGGGAGGGAGGAAGGAAGGAAGGATGGGAGGGAG  
AGAGGAAGGGAGGATGGAAAGGAGGAAGGGAGGGAAAGGGGAGGGAGAGAGGAGAGAGAG  
ACAGAGACAGACAGAGACAGAGACAGGCAGAGACAGAAAGGAAAAAGACCCTAATGCTGT  
CC

>7834 len=182 tot-seq=1

TATTATCAGGGGTACAAAACCTTAGATGTGGGGGAAAGCACAGCCTCCCAAGCCTGGT  
GTGACTGAAGGCCTCTCTCCAGGCAAGGACCAGCAGGGCTCAGCGAGGCAGGTTCTGTAG  
TGACATTTGCATCAGGGAAGAGACTGGCAGAGGTCAGTGTCCATTCTGGTAAACCCAGC  
TC

>7835 len=182 tot-seq=1

TGGGGAATATTGCACAGTGGGGGAAACCCTGATGCAGCGACGCCGCGTGGAGGAAGAAGG



TCTTCGGATTGTAAACTCCTGTTGTTGAGGAAGATAATGACGGTACTCAACAAGGAAGTG  
ACGGCTAACTACGTGCCAGCAGCCGCGGGTAATCAGGAGATCGGAAGAGCGTCGTGTGGG  
GA

>7836 len=182 tot-seq=1

CCCCCAGTTCTAAGGCCTATGACTTCGTGTCCCCTGTACCTCACCATACTTGAACCTCCA  
TTCTAAAGATGGGATCCTTAAGCATGTACCAGATGCCTATCACACAACCAAACAGCCAAA  
TACAAGTCCTGGCTTGCTCCAAACTACCACGACATCGCTCTTCTGAGCCTCGCTGAGCAC  
GT

>7837 len=182 tot-seq=1

ATCCAGCTGTGGGTCTGTAGATGTATGGGAAGCATACATCTAAGAAAGCTGACTGACGGA  
AGTACTGTTGGTAGTCTGCCTTGATTCTTACAGGTGACTCTTCTACAGGGGCATGGTGGT  
CAGCAACACGTGTTTTATCAACAGAGCGTTGATCTCATCCCCTAAGTGACCCTTACCAAC  
AG

>7838 len=182 tot-seq=1

GAGCGCCGACGGGAGGCAGCAGTAGGGAAGCGGCCACAAGTGACGCAAGGAGGATGGAGC  
AAAGAAGAGGGAGTGAAGAAGGGTTTTCGGAGAGGAAAGATCTGGGGGGAGTGAAGAAAGA  
GAGAGGTAGTAAAGGGCATTGATTTGAAGGGAATTACTTAGAAAGGCACGGCTAACTACG  
TG

>7839 len=182 tot-seq=1

TGTTCTGGAATCGTTTGTGATGGAAAAGATTTAGACACTCGTAGCAGTGTCTGGGATC  
CTGTGTGAGGGACAAACTCAGAACTGGTATCAGTGTCTGGAACCCTATGTGAGGGA  
CAAACATTCAGAACCCAGCGGCAGTGTCTGGAATCCTATGTGAGGGACAAACTCAGA  
AC

>7840 len=182 tot-seq=1

TGGGGAATATTGGACAATGGGCGCAAGCCTGATCCAGCCATGCCGCGTGAGTGATGAAGG  
CCTTAGGGTTGTAAAGCTCTTTCACCGGAGAAGATAATGACGGTATCCGGAGAAGAAGGA  
TAGAGGTAGTAACTGGCCTTTATTTGACGTAATCAACCAGAAAGTCACGGCTAACTACG  
TG

>7841 len=182 tot-seq=1

GATTTGGAGACTGGATAATAGAGGTGAGGGAGAGAGGAGATATAATTCTCAGGTTTCTGG  
CTTGGTTGCCTGGATTAGTTTATTGGTGTGATGTGAGAGAGAGATTACTGATAGAGGAAA  
AAGGTAGATGAGTTTAGTTTAAAGCATCTTAACTTTGAAGTGCCTGAGAGATATCCAGCT  
AT

>7842 len=182 tot-seq=1

TGGGGAATATTGCACAATGGGGGAAACCCTGATGCAGCGACGCCGCGTGGAGGAAGAAGG  
TCTTCGGATTGTAACTCCTGTTGTTGAGGGAGATAATGACGGTACTCAACAAGGAAGTG  
ACGGCTAACTACGCGCCAGCAGCCGGGTAATAGGTAGATCGGAAGAGCGTCGTGTTGGGG  
AA

>7843 len=182 tot-seq=1

TGGCTGAGTGCCAGCAGGTGCTGGCCTCTCTCCTGGGCTCAGCAGGGCAGGTCCTGGCTG  
GCCCAAAGCTTCGTCTCTGGAAGCCTCCTTACCATCCTGTCGTACAAGCACCTGCTCT  
TCCCTCCCTGCCACACGCTCGCTTTGGGCTCACTTGGCCAACCTCCAAGTTCCCAGCCAA  
AC

>7844 len=182 tot-seq=1

TAGGGAATCTTCCACAATGGGGCAAAGCCTGATGGAGCAACGCCGCGTGAGTGAAGAAGC  
ATCTCGGTATGTAAAGCTCTGTCAGCAGGGAAGAAAATGACGGTACCTGACCAAGAAGCC  
CCGGCTAACTACGTGCCGCGAGCCGCGATAATGCCTAGATCGGAAGAGCGTCGAGTAGGG  
AA

>7845 len=182 tot-seq=1

TGGGGAATATTGCACAATGGGGGAAACCCTGATGCAGCGACGCCGCGTGAGCGAAGAAGG  
CCTTCGGGTCGTAAAGCTCCTTTATATGGGAAGATAATGACGGTACCATAAGAAAAAGCC  
CCGGCTAACTACGTGCCAGCAGCCCGGTAATATAAAGATCGGAAGAGCGTCGTGTATGGG  
GA

>7846 len=182 tot-seq=1

TGAGGAATATTGGTCAATGGGCGAGAGCCTGTACCAGCCAAGTAGCGTGCAGGACGACGG  
GCCTATGGGTTGTAACTGCTTTTATGTGGGGATAAAGTGCGCGACGTGTCGTGCATTGC  
AGGTACCACATGAATAAGGACCGGCTAATTCGTGCCAGCAGCCGCGTAATACCAAGATC  
GG

>7847 len=182 tot-seq=1

TGGGGAATATTGCACAATGGGGGAAACCCTGATGCAGCGACGCCCGTGGAGGAAGAAGG  
TCTTCGAATTGTAAACTCCTGTTGTTGGGGAAGATAATGACGGTACCCAACAAGGAAGTG  
ACGGCTAACTACGTGCCAGCAGCGCGGTAATGAGAAGATCGGAAGAGCGTCGTGTTGGGG  
AA

>7848 len=182 tot-seq=1

TGGGGAATATTGCGCAATGGGGGAAACCCTGATGCAGCGACGCCCGTGAAGGAAGAGGG  
TCTTCGATTGTAAACTCCTGTTGTTGAGGAAGATAATGACGGTACTCAACAAGGAAGTG  
ACGGCTAACTACGTGCCAGCAGCGCGGTATCCAAAGATCGGAAGAGCGTCGTGTTGGGG  
AA

>7849 len=182 tot-seq=1

TGGGCATCATTGCCACTTCCCAGAGGCCCAAGGGGTCATAAAGTCCAACAAGCTGTCTC  
AACAAAGCTGTTTCCAAATCCTCTGGGACAGGATGGCTGTCCAGAGAGGCCCTGGCTGAA  
TGGCCTTCGAGTCTGAGTGCCTCTCAAAGGGAGGATCAGGGTCTCGGTTCTTGTCCCC  
TG

>7850 len=182 tot-seq=1

TCCGCCGTAGTGTTCTTGGTGATGTAACACGAATTCTTCCCGTGAACCAGCAACAGCCGT  
CTGATATTTGTCCAACCAATCTGGTAGTCAGTGCAGCCTCCCCGATGCTGATGCGC  
TGGGGCTCCCAGGTTGTCTTCATCAAGATGAATCAAGGGGTCAATCTTACCCAGCTCGTG  
CC

>7851 len=183 tot-seq=1

TAGGAGTGGTGCAGATCACCACAACCAGTTTATGCAGTGCTGGGGATTGAACCCTGGGCG  
TTGCACATGCTGGGCAAGTACTCTGCCAAGAGAGCTAAGTCTGTAGACCTCAAAGTGAAG  
ATTAACCCTGCCAGTGGGTTAATCTTCTTCAAAGGTAGCTTGGACAAGAACAGCGAGTG  
GTT

>7852 len=183 tot-seq=1

GCAGGCAGATCTCTGTGAGTTTGAGGACAGTTACAAAGTCTCATGGTCAGTTCCCCGAA  
ACACAACAATCACTCAGCGCTAACCTAGCACATCTTCTTACCCTTGGAAACCCCAACCA  
TCATAGAATTTCTAAACCACTCCCACAGGCCATGCAGCTCAACCACCAGCCTTAGATACT

TCT

>7853 len=183 tot-seq=1

CTGTTCTGCTAGTCTGGCTAGCCAGTTTCCTTCAGGAATACTCTGACTTTATTCGCTGT  
GCTGGGATTACAGGCAGGCAATGGTACTGTGTTAGTTTGAATAAAAATGGCCCCGCTGG  
ACTGGAGAGATGGCTCAGCTGTAAAGAGAACTGACTGCTCTCCAGAGGTCCTGAGTTCA  
ATT

>7854 len=183 tot-seq=1

CTGGCTTAGGCTCTTGAAATCCCAAAGCCCACCCCCAGTGACACACTTCCTCCAACAAGG  
CCACACCCACCCAAGAGGCCACACCCACCCAAGAGGTCATACCTCCATCCTTATCAGTAG  
TGCCATTCCCTGGTGACCAAGCCATTCAAATAGATGAGTCTATGAGGGCCCTTCCTATTC  
ATC

>7855 len=183 tot-seq=1

TGGACCAGGTAGGTGGGCAGGTTCTCAAACCGTTGGGCAGTGTTTCATGGCATGGGTGATA  
GCAATCGAAGTGGTGGGAAAACCTCTGAAACCCAAGTAGTCAGTCAGCACTGGTGTTGG  
AACTGGCTGTGATGGGTTGGTTGGCCTTGTCTCAAACCTACAGGTGGGTCGTGTAGGTG  
GGT

>7856 len=183 tot-seq=1

CCAACAATGAGAAAGCTGATTCCACACAGAGAACTGGAAAAGAACTGAACAGCACACGGG  
CACTTCTCGAGACTTCTCCAGACAGGCCGGGTCCGGAGGCTCGAGGGGTCCCTGAAAGGC  
TGTAGATTCCATGACCCACATCCCTGTGCTACCCTAGCAGACCCACTTCCTAAGGAATTG  
CAC

>7857 len=183 tot-seq=1

TGGGGAATATTGCACAATGGGCGCAAGCCTGATGCAGCGACGCCGCGTGAGGGATGGAGG  
CCTTCGGATCGTAAAGCTCTGTCTTTGGGGAAGATAATGACGGTACCCAAGGAGGAAGCC  
ACGGCTAACTACGTGCCAGCAGCCGGGTAATCAATAGATCGGAAGAGCGTCGTGTAGGGA  
AAG

>7858 len=183 tot-seq=1

GCTCCAGGGAGTCGGGGGTGGCCTTGGGCAGGGTTTCTTCACTACGAGGGGTGTCCCCCA  
AAGAGCCATGAACTGTAGAGGAAGAGAAAAAGTTCAGAGCTAAGGGCTCAGGAGATCCTG

TGTTTAGGGAAGGTGACGGTCCAATTGGGGCCCGTTTTAGCTGCACTCACCTCTCTCGGT  
GGC

>7859 len=183 tot-seq=1

GTCAGACGGGTGCTCTCCGATATAATAAGGGAGGCAGAAGTGGGGAATATTGCGCAATG  
GGGGAAAAAATGAAGAAGCGACGCAGCGTGCGGGATGAAGGCCTTCGGGTTGTAAACCGC  
TTTTGATTGGGAGCAAGCCTTCGGGTGAGTGGACCTTTCGAATAAGCGCCGGCTAACGAC  
GTG

>7860 len=183 tot-seq=1

TGGCCCTTCTGTGGCCTGCCATCAGGGAGGATGGTGCCACTCTCAGTGGGAGCTGCATA  
GGCAAGCAGCTGTGGGTACACGGTTTGCTCATGCCTTAGTCCCACAGAAGCTTGCAGCA  
ATTGTGGTGATATTTGCCTTGGGGCATGTAAAAGCGCCAGTCTACACTCTCCCTCCTT  
GTT

>7861 len=183 tot-seq=1

GCAGGTGGGAGGCGCTTACTTCCCTCGTGGCTGGCCTTGACCCCCACACTGCTACAAGT  
TTCAACAAGACATGCTTACCAGCAAAGGAAGGACCCAGGTCCCAACAAGGGCAGGCACT  
GGGGCTGAGCACCCCTCCCTCTCTCGATCTGGGAATCTGAGTTCAAGGACTCCCAGGCTC  
TGT

>7862 len=183 tot-seq=1

TGACTGGAGTTCAGACGTGTGCTTCCGATCTCTACGGGAGGCAGCAGTGGGGAATATTG  
CACAATGGGGGAAACCCTGATGCAGCGACGCCGAGTGAGGGAAGAAGTTTTCGGATTGT  
AAACCTCTGTCCTTGGTGAAGATAATGACGGTAGCCAAGGAGGAAGCTACGGCTAACTAC  
GTG

>7863 len=183 tot-seq=1

AATGGGCACAGAGTGTCTGCTGGCGTGGGAGCAGAGCCAGCTTTGGACAGGTTCAAATCC  
CTGGTTGTCACCTCCTACAGGGTTATGTAGGGGCAGTCACACCCCTACTCCATACAAAGA  
GAAGAGCCCTGTCTTGTGGAGTCAGCTGGGGCCTGCAGCCCTGAGCACACCTCTTGAGTC  
ACC

>7864 len=183 tot-seq=1

GTGGCGGGTACGACCGGAGCTCTGGCGGGTCTACAGAGATAGCTACGACAGTTATGGTA

AGTGGCGCTCCAAGGGCTGGTGGTGGGAGTTCAGTGCGCCTCAGTGCACTCTGCCAGCCT  
CGATCAGAGCTGGTACTCTGCTGACCCTGTAAGGGACAAGATTGCCTCTCATGTCTCG  
GTG

>7865 len=184 tot-seq=1

AGGGAGAGGCTGATGTGAGATTCTGAGCCTTAAAATTCGCAGCTTCCCGCGTGGGGTTT  
TAGGAACATCCATCTCCCTTTCTTCTTTCCCTACTGAATTCCTCCACAAAATGATG  
GGCCTCTCTTCCATTTTTTTTTTTAAGTAACAGGTCTGTGTCTTCACTGTTTTCTACTT  
TATG

>7866 len=184 tot-seq=1

CCAATGAAGGCCCAAAGAATCTAGTAGTTGTTTAGTTCACAAGGCTGGATGTTTCATCTG  
CTCTCTAATAAAGCCAGAAGCCTGAAAAAAGTGGGGTCTGATGCCAGTGAAGACTTGCC  
AGCGAGAGTGAGGGCAAGCAGGCAAAGAGCAAGCTGCCTTCTTCTGTGTCCCCTGTGTAA  
GTGG

>7867 len=184 tot-seq=1

AGATGCTCAGGGGTGAGGAAGGAACACATGCTCTTACAGAAGACCTGGGTTCATTCTGGA  
ACCCACAATAAGTGGCTCACAGCTGCCTGGAACCCAGCTCCAGGGGATCTTCACCCCTCT  
CCTGGCCTCTAGAGGCCCGCACATACTTGCCGTACACGCCCGCAGTCGCTCACACAG  
ATGT

>7868 len=184 tot-seq=1

ATACCGGCCAGACAGGCAGAGCGCAGAGGAGTGCGCCCCAGAGATGAAAAGAGAAACGAC  
AGTGCCCGGAGCACCCGTTTCGTGGTTCTTACGCCAAATCAGAGGCTGGGACAGCAGGA  
GGGGGAAGAGACCTGGACCCAGGGCTGGGCATGAGGCAAGGACAGCAGAGAGCTGAGTGC  
AACG

>7869 len=184 tot-seq=1

GGGAAAAGACACATGGAAGCAAGAAGATACGCACTGAGCTGCGCAGGACCTGGGACAGTT  
TGAAGGCCTCTCTCCTTTGGGCCTCACCTTTCTCAGGGAAGCCATAGAGAAATCGGCCTA  
GGACAAGTCAGAGAGAAAAGGGAAACTGCCACTTATGAGGCAGAATCCACGTCCTGTTAC  
TTCC

>7870 len=184 tot-seq=1

GGAGACGGCAGGACAGAGATTCAGGAAGACCCCTGACTGGCAAATATCACTCTCATGAT  
CTCAGGGCCTCAAATGCATTATGACATTGAATTTGCCTCTTCTGTCACCATCTTTAAT  
ATGGGCATTTAAAGCCTCATTAACCTTGCTCTTAACATCCTAGAAACCAAGGAGCTTGG  
TTGC

>7871 len=184 tot-seq=1

AATCGCTTGAACGCGGGAGGCAGAGGTTGCAGTGAGCCGAGATTGTGCCACAATACTCCA  
GCCTTGGCAACAGAGCGAGACTCCGTCTCAAATAAAATAAAATAAAATAAAAAATAAA  
GCCACAATGAGCTCTTACTGGAGTGCCCTAATGATTCTTGAACCACTCTTGGAAAAACAG  
ATCT

>7872 len=184 tot-seq=1

GTGTGTGGCAGACAGTGCCTGGCTTGGTGTGGTGTGATGCTCGCCCTGAGGATGGGAAG  
GGCAGATCCATGACATTTTTCCAAGAAAGAAAGAGGAGAGCCGGGGTGCTTGTGCCAGG  
GGTTGGGGAACTGGTTCTGATTGGCCTGGACCAGCATCTCATGCCTCACCCCAACCT  
GGGC

>7873 len=184 tot-seq=1

CCGATCTCCGACGGGAGGCAGAAGGAGGGAAGCGGAAAAAGGGAAGAAAGGAGGAGGGA  
GAAAAGACGCGGGAGGGAAGAAGGGGGGCGGAGCGGAAAGCGAGGGGGGGGGGAAGAAG  
GAGAGAGGGAGGAACGGGCCGGTATTTGACGGTAATCAACCAGAAAGGCACGGCTAACTA  
CGTG

>7874 len=185 tot-seq=1

CATGGAATTGGAGGAATTCCTGTCAGAGAATGGCATCCCCCGAGTCCGTCGCAGCACGA  
CCACAGCCCTCACCCCTGGTTTGAACCAGCTTCTCCACGGCGCCCTCGGTTCATGGA  
TCTCAGCAGCCGGGCCACAGCGCCCTCCACCCGGGCATCCCGTCTCCGAACTGTATGCA  
GAGCC

>7875 len=185 tot-seq=1

TGGGAATCTTGACAATGGGCGAAAGCCCGATCCAGCAATATCGCGTGAGTGAAGAAGG  
GCAATGCCGCTTGAAGGCTTTTCGTGAGTGCAGCATCATGACAGGACTCGAGGAAGA  
AGCCCCGGCTAACTCCGTGCCAGCAGCCCGGTAATAATCAGATCGGAAGAGCGTCGTG  
TATGG

>7876 len=185 tot-seq=1

CATAGGAGATATCCTGATTTGAGATCAGCCTGGGTATATAGTGAGTTTCAGAACAGCAAA  
AGGCTACATAGAGAGGCTCTGTTACAAAACAAAACAAAACAAAACAAAACAAAACAAAAT  
GGCTGGAGAGATGGCTCTGCAGTTAAGAGCAGTGA CTCTCTCTGAAGGTCCTGAGTTC  
AATTC

>7877 len=185 tot-seq=1

GATGGATAATGATCAGAGGCCCGGGCTGGGACCCAGAGCAGAGTGCAGGCAAACCCACTG  
CAGCTAGCTAGAGCTTGAGCTGCTCCTCCAGACCCAGTCCTTCTGCTTCTCCTCCCCACT  
GCCCCCCCCCAGACCAAGGCGCGGGTTTCGCTTCGCAGTGGAAGTGTGAGGGGGCT  
GATTC

>7878 len=185 tot-seq=1

TGGGAATATTGCACAATGGGGGAAACCCTGATGCAGCGACGCCGCGTGAGCGAAGAAG  
GTTTTCGAATCGTAAAGCTCTATCAGAAGGGAAGAAAATGACGGTACCTTACTAAGAAGC  
TCCGGCTAAATACGTGCCAGCAGCCGCCGTAATGGGGAGATCGGAAGAGCGTCGTGTTG  
GGGAA

>7879 len=185 tot-seq=1

TGAGGAATATTGGTCAATGGGCGCGAGCCTGAACCAGCCAAGTAGCGTGCAGGACGACGG  
CCCTATGGGTTGTAAACTGCTTTTATGCGGGGATAAAGGAGTCCACGTGTGGATTTTGC  
AGGTACCGCATGAATAAGGACCGGCTAACTCCGTGCCAGCAGCCGCGGTAAGATCGGAA  
GAGCG

>7880 len=185 tot-seq=1

TGAGGAATATTGGTCAATGGACGAGAGTCTGAACCAGCCAAGTAGCGTGAAGGATGACTG  
CCCTATGGGTTGTAAACTTCTTTTATATGGGAATAAAATGTTCCACGTGTGGATTTTGT  
ATGTACCATATGAATAAGGATCGGCTAACTCCGTGCCAGCCCGCGGTAATAGCTAGATCG  
GAGGA

>7881 len=185 tot-seq=1

ACACAGTTTCAAATCCCCGGCTCTTTCTTCAAACACCAGGGTGTAGGAACAGACCCTG  
GATTAACACAGCACTCAAAAAGGTGCCTGAGAGGTGCAGTTATTCAACCACAAGGCCGAT  
ACCCAGAAGGAAAATCAGCACAGTGA ACTCTCTACCTTTCAATGGATACTTCCAGTCCCC



GTTAC

>7882 len=185 tot-seq=1

TCAAGGTCAAGCAAAGCTTCATTTGACCTGGGCGTGAAAGAATGTGCAGGACTGTGGTAA  
GCAAAGGAGACAGGTGGCATTTCAGCTTCAGGAATAGAATGAACAGGGAGTTGGAGGAA  
AGAAAACACAAAATGGCCTGTTACAATAGTTAAGGCAAGAGATGGGGAAACCTTCAACCT  
GGTCA

>7883 len=185 tot-seq=1

GAAGAGCGAAGAAGGGAGGCAGCAGGAGGGAAGCGGAAGAAAGGGGCGAAAGCCGGACGG  
AGCAACGCCGCGGGAGTGAGGAAGGTCTTCGGATCGTAAACTCTGTTATTAGGGAAGAA  
CATATGTGTAAGTAACTGTGCACATCTTGACGGTACCTAATCAGAAAGCCACGGCTAACT  
ACGTG

>7884 len=185 tot-seq=1

GGGTTCAAGTCTCAACCTAAATTTGAAAATCATGGAGCTGATGAAAACCTCATCTCACA  
GATGAAGACACCGGTTGCTTAGAGACATGATGGGCTTGTCCTGTTTCATGGGGCCAATGA  
AGAACAGAGCCACACCGTGAACAGCATCTTGCACTAGGCCTGGGAGATTTTGCTATTTAC  
TAACT

>7885 len=185 tot-seq=1

CGAGGGAGGGCTGGGGGCCATAACTCTCCCTGGCATCTGGCAGAATCCAGTTCTTTCCGC  
TGCTGGGTGATGTCACCTATTGTTGAAGGCTATGCTTTTTATAGCTTCTGCCGCAGCTAG  
GGAGGGCGGCTGGCAGGCGGCAGGGAAGGGCGCTATCGGTTTCCAAGCCTCGTGCTCCCA  
GCCCT

>7886 len=185 tot-seq=1

TTCAGAAACGTGGTCAGATTTGAAGTTGAATCTGAGGGTTTGAGTTAAGGAAATAAGCTT  
AAGGAGACAAGATCATTACCACAATGTCACACAGGCAGAGATCAGATACAAATCAGAGA  
ATGCCAGAGGTGTGATAAAATAGTTGGTCAATTGGGGCCAGGCACAGTGGCTCATGCCTG  
TAATC

>7887 len=185 tot-seq=1

AAATAGCCGTACAAATGGTGAAGCAAAACAAAGCCGATGCACTCATGAAAGGCTTCGTTA  
ATACCGATGTTTTGCTAAAAGCAGTGCTCCATAAAGAACACGGAATTTGCCAAAAGGGA

ATGTTTTGACACACATTACAGCAGCAAAAATAAACGATTATCCCAAGATTTTATTCTTCA  
CAGAC

>7888 len=185 tot-seq=1

TCCAGTTATGAGCAGAGACTCTGGGCTTTCACAGAAGGTAGCCTAGCCCTGAGAGGAACT  
ACCGAGTAGGCCCATGGTCCTTAATGGCTGTGAAAATGATGACCAGTATCCAGTATCTGC  
TGCTCCACCTTGACGCGTGACTTGTTGGAAGACAAGAAGTACCATCTGGCCATATGTCTC  
AAGAG

>7889 len=185 tot-seq=1

GGAGCCAAGGACCAAGAAGGACTGAGGTACAGTCATTCTGCATCCAAAGGCTTAAATTGT  
AAGGGACTGGCTTACTCTGGCTGTTCCGAAAGGCAGGCCAGCCAGCCCTCCCGTCT  
CTCTCTGACAGCCAACCTCACATGTGCCTCCCTGGGAGCACCTGCTCCGAGCTGTATC  
AGCCC

>7890 len=186 tot-seq=1

TCTGACAGACAGGGGGCAGAATAGCTCAGTAAAAAAAACCTTCTCTGAAGGGCCAACATT  
CCTAAAATAGACCTTTGCTTGACCTCAGGCGTAGAGGTCCTAGTGCCAAGGCCCTAAGAA  
AGCAGCTCATCTCATGTTAAGACTGGGCTAGAAGGTGTCTATGGGGCAGGCCACACCT  
TGGTGG

>7891 len=186 tot-seq=1

CACCTGCAAAGCTTTTGAACCTAGTTTGTTCCTGTCTGAAAAAATGCAGGGACAAAATG  
GAGCAGAGACTGAAGAAATGACTGACCAGTACTGGCTCAACAGGCACCAATCTCTGACA  
CTATTACTGATTCTATGTTGTGCTTGACAGAAAGGAGGCTTGCTTACTGCTCTGAAAG  
GCTCTA

>7892 len=186 tot-seq=1

GCATTGCAATTCACAACAGTAGCAAAAAGACAGTTATGAAGTAGCAACGAAAGTAATTGT  
ACAATTGTGACATGAGGAGCTGTATGAAAGGATCAGAGTGTTCCGGGCGGTTGAGAACTGC  
TGCTCTGGTGTAGAGGACGTGAAGACATGGATGCTGAGGACAGGCCTCTCCAGAGAACCC  
AGCCAG

>7893 len=186 tot-seq=1

TGTCATCCTATGCTCTTGGACAGAGAGAGCATGATGAACAGAGGAGCATGTGGCAGAGGC

TGCTCCTCTTGGTGGACAGGAAGTGAGAATGAGAGATTGGCCAGGACCAGTCCAACCT  
TCAAAGTCTTGCTTTTTCCAACCTATGTTCAATCTCTTGACATTTTTTAGAACCTCCCAA  
ACATTG

>7894 len=186 tot-seq=1

TCTGCCACTAACTGACCTCCAGTTTACTCACACTTCACATCCCCAGGCCCAAGGAAGACT  
TTCAGGGTCTCCAATTCCATGGCCTTCTGCTTTCTGCTAGATACTAGACTGTTCAAAC  
CCTGCCCTTAGTGAAGTTCTCCGTTTTTACC GCAGAGGTCTAAGTGGGTAAAGTCGATT  
GTGAAC

>7895 len=186 tot-seq=1

TGGGGAATTTGCACAATGGAGGAAACCCTGATGCAGCGACGCCGCGTGATTTAGAAGGC  
CTTCGGGTTGTA AAAATCTTTTGTATGGGAAGAAAATAACAATACAGGACTCTTTGAGG  
CCCTGTAATTGGAATGAGTCCACTTTAAATCCTTTAACGAGGATCCATTGGAGGGCAAGT  
CTGGTG

>7896 len=186 tot-seq=1

GACCTACAAGGGTAGAGAGGTGCGCTGCAATGATGCCAACGAAGAAGGTCATGGACGCAA  
AGCGCAAGCCACAAGAGGTGGCGGAAGGGCTGCAGGTAGACGTGCGGAGGGCGGACGCAA  
GAATGGAAAAAATGCGAAACGACCTCTTATCAGCAGGAAGACACTGGCGACTGGCGACA  
GTTTTT

>7897 len=186 tot-seq=1

TTCTTGTTCTGCCACCAGATATACCTGCAGACCTAGTGTATCCTCTCGCCCAGAACACA  
GGACATCTTATACAGGGGGCTCTATCTACAGGGGGCTCTATGCTTTGACAGGAACTGTGA  
ACCTATGGGCAGCGGATTTTCAATTCATGTTTGTAGCTCTCATTACAAATGTCCTGCCTC  
AGGCAC

>7898 len=186 tot-seq=1

CCGGGAAGGAGCGGAGATGCCGGATCGGACAGGCTTCAACCAGGAGAATCCGGCTTGAGA  
GAAAGATGGCTTCTCCACATCATGGGTGATAAAGAGGACCGTCTTTTTTCTGCCCGGC  
ACTGTTCCAAAAGCCACTCCCGCATGGAGAGCCGTGTCAGGTAATCCAGCGCCGAAAAAG  
GTTTAT

>7899 len=186 tot-seq=1

CAGAGTTCTAGAATCCTATGTGAGGGAGAAACACTCAGAACCCAGCAACAGTGTTCTGGA  
ATCCTTTGTGAGTGACAACTTTCTCAACCTCGTAGCAGTGTTCCGGAACGCTATGTGAG  
AGACAAACACTCTTAACCGACCAGCAGTGTTCTGTAATCCTATGTGAAGGACAAACACT  
CAGAAC

>7900 len=186 tot-seq=1

ACTGATTTTCATCTTGATCGTCCAGGTAATCACTCCAGCCAACACTATAAGTCCCTTCTTA  
GCCTTTTGACTIONAAAGGTAGGAGGAGCTCAAAGTGCCAGGTGGCAACTIONAACTTCCAG  
TTAATGGAATCATTGTTGTGTCTCCTGGTGGCAGCATTCCCTTGGAAACCAAGACC  
TCTAGG

>7901 len=186 tot-seq=1

TTCAGATATAATAAGGGAGGCAGCAGTGGGGAATATTGAAAATGGGAGCAAGAATGATG  
CAGACATGCCGCGTGTGTGAAGAAGGCCTTCGGGTTGTAAAGCACTTTCAGCGGGGAGGA  
AGGCGATAAGGTTAATAACCTTGTCGATTGACGTTACCCGCAGAAGAAGCACCGGCTAAC  
TCCGTG

>7902 len=186 tot-seq=1

TCCGATATAATAAGGGAGGAAGAAGTAGGGAATATTAGGAAATGGAAGGAAGTATGAAAG  
AGAAACGCAGCGTGAGTGAAGAAGTTTTCGGATCGTAAAGCTCTGTTGTTAGAGAAGAA  
CGTTGGTAGGAGTGGAAAATCTACCAAGTGACGGTAACTAACAAGAAAGGGACGGCTAAC  
TACGTG

>7903 len=186 tot-seq=1

AAAAGCCTTAGTTTTACATTTTAGTGAAACTGTTAGCAGTAGGAGGATTTGCTTTGTGT  
GTGTGTGTGTCTGTCTGCTTTGCCTTATTTGGTTCTGACCATACCACTGCTATCTCAGT  
CTTAGAGGCTGATTTTGTGGCCAGAGTGTTTCGTTTCAGATATCTTTGTGTTGAGGTGAT  
ATTGAG

>7904 len=186 tot-seq=1

AGCAGTAGATGGGCCAGTGTGGGCCTGGCGTGGGACGAGGTGCCTCCTGCCCCGGAGG  
CGCCTTCTCCGGCCACCTCCTCTCACTGGCTGCTGAGCATCTACACTGAGCTGGGCACGG  
CCTCATCGAGCCTCCAAGACAGGGTGAGAAGTGAGCAGAGCAGAGCAAATGGTGCTGCAT  
GAACCC

>7905 len=186 tot-seq=1

CTTTTGGCTTCGAATGCTGTGAACCAAAACGTAAATATCCTTCTGGCCAAGAGAAGAAGG  
TGAGATACACGGAAACAAGAGGGCTGCAAGACACTCTTGTGACCTTGTGATGTACCTGG  
AAGCAGGTTAATATTGGCGCTTCCAAGCTTCTGGGTAAAGCGATCCACACACCTGGGTC  
CACAGC

>7906 len=186 tot-seq=1

CACTGGGTGGAGAAGGGGAAAAGAGACCCCAGGAGGGGAACAGCCTACCCCTCTCCTGTC  
TGAGATTCTCTACCAAGCTCCCAGCCACCGAGAGCTGCTGCAGGCCCTCGGGCCAGAG  
TCCGCCTGCGAGAACCTGCCCTGACCTGCAGCGGGCCGAAGATGTCCCTGGACCTGGCCT  
GCATCT

>7907 len=187 tot-seq=1

TGGGCAGCAGTTTCTTTTCGGATGAGGCTGCTTAGCAGAATGTCTCCCCGCACAGCCTTTT  
GCCAGTCTGTGCAGACCTCCCAATGTGCTCGTCAAAGGCCCTTGAGCTCATCAAAGC  
CATCCATGAGGAAGAGGATCCTGGAAGGCTTGCAGGATCTTGCACACTGGGGGGTTTG  
GGTCAGG

>7908 len=187 tot-seq=1

GCAAACACAGAACAAAGGCTTGGTGCTGAGCCCCTGATCTGGCCATCATGTATCTCAGGG  
CTGGGCTGCAAGCTAGTGTGCTCATCTGGAAGCAATATTGTAGTAACGTTAGACGGCT  
CGAATACGGCATATTCTCTGAATCCGTGAACTCTACAGTGAGGAATATGGATTTAATGGA  
TAATCTC

>7909 len=187 tot-seq=1

CAGCCTATCTGGCTTCAGCTTGGTTTTGTCCTAGAGCTAGATGAAAGGGGGAGGAGAAAG  
GCAGGTCCCCATTCTTCTAACTGACTCTGCAGCTCAGCTCTCCAGCCAGACTTAAATGC  
CTGGAACAAGGACAATGGCAGGCCATGATCCTGGGAAAAGTGAAGCCATCACCTCCTTAG  
CCAAGGT

>7910 len=187 tot-seq=1

CAACTTGTTTATAAAACCATCTTGCAGATTTTTCTAAACAACTCATTCTGATCTTTCTG  
AATTTACCAAGATAAAGTGAAACAAATAAATGCCTGCATATTGAAAAATGCAGGGGGTGC  
AGGGCTGGAGAGATAGCTTAGCAGTTAAGAACACTGACTGTTCTTCCAGAGTTCCTGAGT

TCAACTC

>7911 len=187 tot-seq=1

TTGCCCAAACAATGGGCCTGAAACCCATCGTGGCCTGAAACCTCTAACGCGGTGAGCC  
AAAGCAAAGGGTTGTCCCCTGCTCGCTCTTCTCTGGAGACCTCATTGGTGACTGCTTGGC  
CCTTCTTTGCTCCGCTCAGTCCTAAGGAGCTCCACCCCGCAGTACTGTCTTCTCATCCTC  
CTTCAAA

>7912 len=187 tot-seq=1

GGATGGGGCAACACTGACGAACACCCAAAGCCAAACAGGGTCAGGCGTTAAGAGTCCTAC  
CAAGGTCAGGGCGTCTGCGCCTGCAGACTGCGCTCCAGTACGCTGGTGCCTCCAGACGGG  
CTTGCACCCAGAGCATCCCTTCCCTTGACCGCAGTCTAGGCAAAGGCAGCACCTCGCCG  
GGAGACG

>7913 len=187 tot-seq=1

AGACAGTAATGGGGGATGTAATATGAGCTGTCTCGGTTTTGAACACAGTAGATGCTGGGA  
TGCAAGTTTTGGTTGAAATTGAATAGAAGATAGGATCTACTCTACAGTCAGCACTAGGTC  
TAGACGCTGCCCTGACCACACTGCCTCCACAGATTCACACTGTCGGAAAAAACACTTGC  
TCTGGTT

>7914 len=187 tot-seq=1

AATGTGTAAGTGGAGGAGTGAGAATTCACCCTAGTTTGGTTTGGTTTTGAGCCTATGTTT  
CTAACTGCTACCATGATGTGGTCTCCAAGTGTAGTGGTCTTGCTCATTGCTTCTCTACCT  
GACAGTGGTATGTGAACAACACTTCTCTGTAGACGCCATAGTTAGACCACAGAAGTCAGA  
TCTTTTT

>7915 len=187 tot-seq=1

GCAATTGTGCTGCTCAGGGTACTTTGCTCCTGGACCGCTGACCCCCCTGAGCCAGGCTCA  
GGAAGGTAAAAGCATTAGCTCACTAGCGTCTAACTTAACACAGCACCTCAAAATAG  
GGGAGCCTGGTCACTATAAGCCACCTCCTCCCTTACCTGGAAGACCCACCTCTGGGTAC  
ATCACAG

>7916 len=187 tot-seq=1

GAAACTGTGACCACCCAGGGCCGAAGGGACAAGGGAAGGAAATAGTGTACCAGCCAGT  
GGGAGAGGGAGCACCGAGCAGGAGAGATACAGCCATGGTCAGGGCTGTGGTGGCAGAACA

GGGTGGGGACAGGATAAGAAAAACCCCAACCCTGCCACCTCCTGTTCTTGGGATTTGCC  
AGTGGCC

>7917 len=187 tot-seq=1

AATGTATTCAGATCTTTCTTACGGCATTTCATAAAGCCTTATAGTTACTCAAGGAAAG  
ATCCTTGAGGCCAGGGACTATCTTTCTATTAGGATCCATCTTGGTATTATCCTCAGTACC  
CAATGTAGAGCCTTGGACTTAGCAGGCCTTCTGTTAATCCAGTGGTTCTCAAAGTGTGCT  
CTTAGGA

>7918 len=187 tot-seq=1

TGGGAATATTGCACAATGGGCGGAAGCCTGATGCAGCGACGCCGCGTGAGGGATGACGG  
CCTTCGGGTTGTAAACCTCTTTCAGCAGGGACGAAGCGTAAGTGACGGTACCTGCAGAAG  
AAGGATAGAGGTAGTAACTGGCCTTTATTTGACGGTAATCAACCAGAAAGTCACGGCTAA  
CTACGTG

>7919 len=187 tot-seq=1

GGTCCTGCGTCTCCGCGGGAGTGTTGGCGGCGGGGGTCGCTCTGCGCGGGGACACTTGG  
CAGAGGGGGCGTGCGCCTCTCTAGGAAGCTTCTCGGAGCCCCAGACTGGCGAGGCG  
CCGCGCCCCCTTCTGGATTCCGGCGCGCCCCCTGAACCCGGGAGCTACGAGCGGAGTC  
GCTTCTC

>7920 len=187 tot-seq=1

TGTGACTGGAGTTCAGACGTGTGATATTAAGATATAATAAGGGAGGAAGAAGTGGGGAAT  
ATTGAAAAATGGGAGAAAGAATGATGAAGAGAAGAAGAGTGAGAGAAGAAGTATTTAGGT  
ATGTAAAGATATATAAGAAGGGAAGAAAATGACGGTACCTTACTAAGAAGCTCCGACTAA  
ATACGTG

>7921 len=187 tot-seq=1

CTCTTAACATGCCTCCTTTGTCCCCAACCCCATCCTGTTTCCAGCTCCAACCCTTGCA  
CAAAGTCAGGAAGGACGAGATTCATGAGCCTGTTATTTCTCATCCCCAACCCCCTACT  
CCCATACCCCAACCTCCCCTGTTCTTACCTTACCTTACGGACTCAGGAATGCTCCTTGCTA  
AAGATTT

>7922 len=187 tot-seq=1

CGTGACTGGAGTTCAGACGTGTGCTCTCCGATATAATAAGGGAGGAAGAAGGAGAGAAA

ATAAAAAATAAAGAAAAGGGGAGGTAGTGAAGAAAAATAAAAAATAAAGGAATCTTTCGA  
GGCACTGTAATTGGAATGAGTCCACTTTAAATCCTTTAACGAGGATCCATTGGAGGGCAA  
GTCTGGT

>7923 len=187 tot-seq=1

AGAGGTAAAGACTTCATTCATTTGGCATCTCAACAAGTGTTCAGTAGCTCCTTTGGCC  
GGATGCTCTCCTGGGTGCTTAGAATACGATAAGCAGGGTCCCTCCCCTCCTGGAGTGACA  
GTCTAATGGGGACAGAGGTAGGTCCAGGCGCTGGCCCGCTGGCTTGTGGTTTTTCTACA  
GCAGTAA

>7924 len=187 tot-seq=1

CCCCATAAAGCACTGTGAAAATCAAGTCTGGGTCAAATGATCAGCGACAGAGAACTAA  
AATGCCATCAAAAGCCCTTCCGTGATCCCAGCACAAACATGGATGTGAACTGTGCTCTC  
ACTACAGAGGCTCAAAGCCCATCTCCAGGCCCTGTTCTTCCACCACATGTGGTAGAACT  
CTCTTCC

>7925 len=187 tot-seq=1

TGGGGAATATTGCACAATGGGGGAAACCCTGATGCAGCGACGCCCGTGAGCGAAGAAGG  
CCTTCGGGTCGTAAAGCTCTTTTATATGGGAAGATAGTGACGGTACCATAAGAAAAAGCC  
CCGGCTAACTACGTGCCAGCAGCCGGGTAATTTAAGATCGGAAGAGCGTCGTGGGAAAG  
AGTGTAG

>7926 len=188 tot-seq=1

TAGTGGGAACAGTCAATACCTGAGGCAAACCAAGAGATATAGATGTAAGATACCAACAAA  
GTATAGGGAAAAAATAAAGCAGAAGGAAACAAGGACCAGAACTCCAGAGACCCGGAGGA  
AAAAAGAAGCTAGGTGATACCAGTACAAAGCTAAGGAGTCTGGTAGTGGTGGTACTTCGT  
CTTTAATC

>7927 len=188 tot-seq=1

TTGGGAATTTTCGTCAATGGGGGAAACCCTGAACGAGCAATGCCCGTGAGTGAAGAAGG  
CCTTCGGGTCGTAAAGCTCTGTTGTAAGAGAAAAACGGTAATGATAGGGAATGATCATT  
AGTGATGGTATCTTACGAGGAAGCCACGGCTAACTACGTGCCAGCAGCCCGGTATCGAT  
AGATCGGA

>7928 len=188 tot-seq=1



CTAGTGACACCCACAGGACACCCAGGATGTTACCACCCTGGCCAAGGAAAAGGAGGAGGG  
GGAGGAATGGGAGGAGCTCATCCGTGAGGGATCCTAGCATCATAACCTCTTCTGGAGGAA  
GGCATGAGATCCCAACCCGGCCGAGTGGTATTCTATCAACCCTACATGGAAAACCCACA  
GGACATCC

>7929 len=188 tot-seq=1

CTAATGGCTAGTTCTTAAAACCTATTTCCCCTGACTTCTGCTCCCACTGCACCCCATTCC  
CAGCTTGCAGCAATGACATGTCACCTTCTGTATGGATGAGATATCAAGTCCAACTGGAGG  
TTTCTCCATGCAAACAGAATAACCAAAGACATCCAACAGGCCAGCTCTCTCAGCTCCAAA  
AGCAGATA

>7930 len=188 tot-seq=1

CCTCAGGGCCCTACTGTGTCTTCCCTGGATCCTAATAAATGAAACTTGCATTTAAATACA  
AACTGCTCAGCTGAGGCTGAAAGCCAATTAGCCTTAAGAACAGGCTGTTCTGATTTTAAC  
AACCTGTCCCTTCTCCTTTTCCAACCTTCTGATTCATTCCTCAGCTTAGCAGAGGAGGCCA  
GATGTCTC

>7931 len=188 tot-seq=1

TTTTTCAAGCAGAAGACGGCATAACGAGATACGAATGTGACTGGAGTTCAGCGTGTGCTCT  
TCCGATCTCCTACGGGACGCAGCGACGCCGCGTGCGGGATGAAGGCCTTCGGGTTGTA  
CCGCTTTTGATTGGGAGCAAGCCTTTTGGGTGAGTGTACCTCCGAATAAGCGCCGGCTA  
ACTACGTG

>7932 len=188 tot-seq=1

CGTGAGTTACCTCTGACTGCTGTGCTGCGCAGTTAATTTAGCTGGCTAGAATCCCAG  
CTGCTCTGAGAGGCCATATCCCTTGCTGGCTGCAGTGAGGAGCTGGGTTTGTCTCTGGT  
GCCTCCTGGTCCTTGTTACCTGCCGCTGGAAGGTGAGAGAGTATCTCACCTGGGACTAGC  
AGAGGAAC

>7933 len=188 tot-seq=1

ACCTTGTTGATAATCGTCATTTCTTAGGAATAAAGTAGACTGTAGAATTTTTTTTAGCA  
GAAAGGAAACCCAAAGATAATTCTAGTGCAAATCCCTCACTTATAGAGCAGAAGCTCAA  
GTCCCAGAGGAACAAGTGGCTTGAACGAACATCGGAATGTTAGGGGCTGGATTTGTACCC  
TCCTGGTG

>7934 len=188 tot-seq=1

CAGGTGTCTGGGCCAGAACAGCCCCTCTCCTGAGTTCCCAAAGGCCACGCTGGCTCCAG  
GACCCCAGGGGCTATTAGGAAACAAGAACTGGCACAGGTGCCACCCCCCTCCACCTCC  
TAAGTGGTCCCCTTTTCCCCAAAGTTAACTTGCCAAAACAGCTGACTAGAAGGGCAGC  
CTGGATAT

>7935 len=188 tot-seq=1

TAGGTGTTTAGTGAACGGGCTATGGAGGCTGCCCCACTCACTACTTCCTTTCTAGGGGAG  
GCCGACTTCAAATGCGTGCACACACACAAACAGGATGGCCTGATGCAGACCAGCTGGTCT  
AGAAAGGCCTTCACGGCCTCAGGGAGCCTGGGAGGCGGCCTGGGGGAGACCATGAAACAG  
CAGATACA

>7936 len=188 tot-seq=1

CCTAAGAATATGTTTCTACAGTCACCCAAAGCAACTGGACATCCCCTTGGTATCAAGTAG  
ACATGAGTTCAAGTCCTTGTTCAACCCCAACCCACTCCATGAGAGCCTAAGCTGGTCCA  
TCCTCAGAGTGGGCATCAGAGCACATATGCCTCAGAGCAGTTACAAGATCAGAGCGCCAA  
CTCCTGCC

>7937 len=188 tot-seq=1

AATCACCTGAGTCCAGGAAGTTGAGGCTGCAGTGAGCTGTGATCGTGCCACTGCACTCTA  
GCCTGGGTGACCGAGTGAGACCCTGTCTCAAAAACAGAACAACGAACAACAAACAAAC  
AAACAACAAAACCATGGGAGTGCAGATATCCCTTCCATGTACTIONTTTTTTCTTTTGG  
ATATACTT

>7938 len=188 tot-seq=1

CAAGTGTGATGGAGTTCAGACGTGCCTCTTCCGATCTCTACGGGAGGCAGCAGTGGGGAA  
TATTGCACAATGGGGAAACCCTGATGCAGCGACGCCGCTGAAGGAAGAAGTATCTCGG  
TATGTAACTTCTATCAGCAGGGAAGATAATGACGGTACTTGAGGAGGAAGCCCCGGCTA  
ACTACGTG

>7939 len=188 tot-seq=1

AACAAAATGAGCAATTTGTGTCAGTAAAACTCTAGAGTACTAAGAGGACCAGCCCTGCA  
AAATCCATACCTGGGGAATGAAGATGAAGCAGTTGATTGTAGTTGTACAAACAAAGATCC  
CTCCAGATGTGAGTCCAAAGACCAGGTTGGGCCAGGAATGCAAGTATCTGGTGACTACAA

AAAGCAGC

>7940 len=188 tot-seq=1

GCAAAAAGAGAATGAGGAAGACACAAAAGTGGAACTCCTGATAAAACCATGAGATCTCG  
TGAGACTTATTCACTACCATGAGAACAGTATGGGGGAAACTGCCCTGTGATTCAATTGT  
CTCCCACAGGGTCCCTCCCACAACACGTGGGAATTATGGGAGTACAATTCAAGATGAGAT  
TTGGGTGG

>7941 len=188 tot-seq=1

CGGACAGACACGGCGTGGATCTTGCGCTGGACTTTGTGTATGCCCTGGCATATCTTGAA  
GCCCTGTTCTCAATAGCCGGGAAAGGCCTGGAATGGTCCGAAAAGAGCTGGGCCTCTGC  
TGCACTGCCATGGAAGCATTGTGTTAGCTATTTCCCTGGTACTGGGGTGACAGCCATG  
GGCACTCA

>7942 len=188 tot-seq=1

GCGGCCGAGCGCCGACGGGAGGCAGCAGGAGGGAAGCGGCCACAAGGGACGCAAGGCGGA  
GGGAGCAACGCCGCGTGAGTGAAGAAGGTTTTCGGATCGTAAAGCTCTGTTGTTGGTGAA  
GAAGGATGGAGGTAGTAACTGGCCTTTATTTGACGGTAATCAACCAGAAAGTCACGGCTA  
ACTACGTG

>7943 len=188 tot-seq=1

GAATGGCAAAGAGATGCCTTCACGGTGTTGATGGTGTGCGCCAGCCACCCATGCACATGA  
CCTGGTGTCTGTCGTGGAAGTGGAGATGCGGCCTTAGGTGCTGACCGCTGAGCCACAC  
AGGTGGGGCTCACTTTCTCACCTATCAAGAAATATACATGGGAAACCCACAGAGCCCTGC  
CTCCTGGC

>7944 len=188 tot-seq=1

GAGACTCTGTCTCAAAAAACCAACAACAAAGAGAGGCAGGGCACGGTACTCACGCCTG  
TAATCCCAGCACTTTGGGAGGCCGAGGCAGGCAGATCATCTGAGGTTAGGAGCTCCAGAC  
TAGCCTGGCCAACATGGTGACCTTCTCTACTAAAATTAGCCGGGCGGTGGCGCACGC  
TTGTAGTC

>7945 len=189 tot-seq=1

CCAGCTGTAATCTAAACCGGTCCCAGCCAGAGTTCTCTGGAGTGCAAAGCTCTGGAATCC  
CTGGAAATCACATTCTCTGTGGATGCTACCAAGAGCTCGAAGCCCTATCTCCATGTGGT

TGCTTGCTTGAACCTCAACGACATTCCCTCTCTTGACCTGATCCCTGAGCTGACAATGTC  
ACCGGAGGC

>7946 len=189 tot-seq=1

GAACAGAAACAGGCAGACACACGTGGACAGGGCAAGGCTGCGGGCGAAGAAAGGAGAAAAG  
AGAAACGGAAGTAGACCAGTAAGATAAGGAGAGAAAACGGCTTGTGGTGACCACAGGATGC  
TGTGTTTAAACAAGGGCCAGAGAGCTGTTAAGGGCACTGGATGCTCTTCCAGAGGACCCTG  
GTTCAATTC

>7947 len=189 tot-seq=1

CGGCATACGAGATACCTCAGTGACTGGAGTTCAGACGTGTGCTGGAGGCAGCAGTGGGGA  
ATCTTGCGCAATGGGCGAAAGCCTGACGCAGCCATGCCGCGTGGATGATGAAGGTCTTAG  
GATTGTAATAATCCTTTCACCGGGGACGATAATGATGGTACCCGGAGAAGAAGCCCCGGCT  
AACTTCGTG

>7948 len=189 tot-seq=1

ATGTAATTAAGGATTTTGAGATGACATCATCCTGAATTCAGGGTGGGTCTAAATCCAATG  
GCTGGTTTCCTTATGAGAGACAGAAGAGGCAGATTTGAGACACAGAGAAACATAGAGAAG  
AAGGCCATGTGAGGACAGAGGCAGAGATTGGAATGACTCCCAGCTACAAGCCCGGGAACA  
CCAAGATTG

>7949 len=189 tot-seq=1

CTGGTCCCAGCTGTGTCCCCGTGTCTCTGTTTGCTGAGTAAGTCATGTCACCAATCTGCA  
ATGCGAGGAGGTGGATGGGAGGCTCTCCCTCCTTTTTGGCCTGGGTGGTGAGTAACCTAT  
GCAGGAAAGTCTCCGGGGTTGTAGTCAAGCCATCCCCGAGTTGAATATCCCATCAGCCA  
GTACAGAAA

>7950 len=189 tot-seq=1

TTGTTATTCTTAGTATTGGTCCACAAAAGTTATATTCACATTCTAGCTTTGATGCCTCTT  
TCCTGGGATTAATGAGCTGAAAGACCTATGTGAACTGTAGAGAAGACCAGGGGCTCAGC  
CCAGCCCAGCCCAGCCCCTCAGGGCTCTGTGCTCTTCTAGGGATGGATGGTTTTGGTAAA  
GAACAGACG

>7951 len=189 tot-seq=1

AAGCAGGGATGGCCAAGTGGATTAAGGACGGCCAAGCGCTCACCTGAGGATTTTGTACACA

GGAGGCCGGGAAGAGGCCAGGCCAGTGGACTGGGCAGGAACAAACAAGGCATCAATAGG  
GGCTGAGTCGGGAGTGCAGGCCAGGCCGAGTGCAAAGAACACCTTCAAGAAGCTTGGCT  
AGAAGGAGG

>7952 len=189 tot-seq=1

AACCAAAGACCGTTTGGTTTTTCAGGAGGAAGCGGGTGTCCCCAGGCTTTGGCACCTCC  
ATCAGAAACGCCACTGCGTGTCCAAAGCCTCAGGCTTTCTTGGGAGCAGCTTCCGTGAT  
GGGAGGGACAACCCACCAGCTGTCACCACTCAGCGCAGAGGCAGGCAGGTTCCAGGGCA  
CTGCCTGGG

>7953 len=189 tot-seq=1

CTGAGGTTCTGCACTCTGCAGGTTTGACCCAACCTAGTCCCTGAGCAGTGTTCCAGTCT  
ATCATGCTGGGAATGAGCCTGGCATTCTGGAATCAGCCTTCTCTGGAGTGCCCACCATGT  
TTCTCTAGTTTGGGTAATGAGCATCGGCTTGAGTCTATGGATCAGCACTCAGTGTTCCCC  
CACCCAGC

>7954 len=189 tot-seq=1

GGGTTTGAAGGAGTAGTTAAGTACTGCGAGGCCTGCGTTTCATGACCAAAGTTCACAA  
ATGCCCATTTCTTCTTTCTTTTCTTTTTCTTTTTTAATATTTAAAAATCTTTATGTGT  
CTATTAACACCTTTTGGAAATTTCCATCCCTTCAAACCTATGTTCCAGTCAAACAAAACA  
AAGTGTGGC

>7955 len=189 tot-seq=1

GGGGGGGACGGGAGGGCAGACGGGGGCGCGCCGAGCGCCGACGGGAGGCAGCAGGGGGG  
AGAGGGCACAAGGGGGGAAACCCGTATGCAGCAACGCCGCGTGAGTGATGAAGGTTTTCG  
GATCGTAAAGCTCTGTCTTTGGGGAAGATAATGACGGTACCAAAGGAGGAAGCCACGGCT  
AACGACGTG

>7956 len=189 tot-seq=1

ATATTAAGATCTCCTACGGGAGGCAGAAGTAGGGAATCTTCGCAATGGGAGAAAGACTG  
AAGGAGCAACGACGCGTGAGTGATGAAGGTCTTCGGATCGTAAAACCTCGGTTATTAGGGA  
AGAACATATGTGTAAGTAACGGTGCACATCTTGACGGTACCTAAGCAGAAAGCCACGGCG  
AACTACGTG

>7957 len=189 tot-seq=1

TGAGAAACACCAATATTAAGAAGCTGGAAAACCAAGAGGAACCTGCATAGAGAAGGCTA  
GGAATGGTGAAAACACTACTGTGGACCTAAGAGCAGTGGGTGAGCCAGAACTGCTGCAG  
AATTTGGAAGGAGGTGAATAATTGGTGATGCCAGCGGGGCCACACTCACAGGAGCCTGCC  
ATCCTATTC

>7958 len=189 tot-seq=1

AGGACATCATCCTGGAGCAACCCATACCCCCAGGGAGCTCTGACCTCAGACTTCCAAGG  
GACTTCTGCACCTCCTCAGGAATTCCAGCCGGTACTCAGCTTCTCCAGGTGGCCTTCT  
AAGATATGACACAAGATGATCCCTGTAAATGGGACAAAACAATGATGAGCAGCTAACACT  
GAAGCACAG

>7959 len=189 tot-seq=1

AATTGCAACTTATATCTTAATATGTTTATAGCAGGCAAATAAATCATTACTCTCCAGG  
GTAGAAGGTGTCAACTTGCCACCAAGTATCTCCTTGATGTCCTTGAAATCCTCCTTCTT  
TACCCTTAGTCTTTATGCTATTTAATCATCTTCAGCTACTTTAAAATCATATTTTCTAAA  
GCATGGTCT

>7960 len=189 tot-seq=1

TCATGCAACAAGCCGTCAGGCTATTGGTTTTCAAGATGCACGACTAATACCGTGGCTTTC  
TGTAACAATAAATGTTGTTTTCGGCATGGAAGGAAGCAAGCAAGATCTTAAGAATATTGC  
GCATTTAGCGCTTTGCCAAATGCGCCTTGAAGGCTACGATAACAAGTGGCCTTCTGAGCT  
TTCTGGAGG

>7961 len=189 tot-seq=1

GCGGGGACAGAAGTAGTTTATCACTGACGTTGATTAGAATTGCTGGTGCATCACTGTTAG  
TCAGTTTATTATTGTTTGTAAATTTTCTGTAGATGATATGACCTTATTGTACCCATGT  
GCACCATTCTATGGCCCCGTCCTTGGGGACACCACTGCTTGGGAGTTAAGATGGTGGAG  
ATCTGGACC

>7962 len=189 tot-seq=1

TGAGGAATTTTGCACAATGGACGAAAGTCTGATGGAGCAATGCCACGTGAACGATGAAGG  
TCTTCAGATTGTAAAGTTCTTTATTTAGGAAAAAAGCGTGCTAGGAAATGAGCGCGCC  
TTGATGGTACTGATTGAAGTAGTGACAGCTAACTATGTGCCAGCAGCCGCGGTATAGAGA  
GATCGGAAG

>7963 len=190 tot-seq=1

CCAATGCCAAGGCTATTAGGGAGTGTTGCTTTCATGCTTACTCTTTTTGACGTGGTTAGC  
CTGCCTCCTTATAGTATCTAGGGTCATAAGCCTAGAGGTGGCACTGCCACAGAGATGGG  
CGCCCCACATAAATCTTCAATCAAATGCCCTACAGGCTTGCCACAGTCAACCTGTGG  
AGAATTTTTC

>7964 len=190 tot-seq=1

ACTCTAAAGCAGCATGACTCTCACTGGGACCCAGTGCCATTTAGGGCACTTTAGGGAGG  
GTAGGGAGAAACCTGATGGAGAGAGTGCTGGCGGGCCCTGGGGTGGAGGGACCACTGGGC  
TCACAGGCAGCTGGGGCGGCCTAGGGAAGGATCAGAAGCTGAGATCTTCAGAGCAGGCTG  
CCGCTAACAA

>7965 len=190 tot-seq=1

AATCCCGCAGGAATTTTCACTACTGGCGTTGTGTAAAATGGGACTCCGGACAAACGTAGC  
ACTATGGGAACCACTGAATCTTTAAAGTTTCAAATAAAAAGGAATATGAGCATTTTTACC  
TCTTGGCTCGACTCATCAAAGTGCTGGCTTGGGTTTGCCAGTCACTAAATCATAAATCTG  
CCAGGCTACC

>7966 len=190 tot-seq=1

AAAGAATATCTTAAATATTTGTTATTTCAAGTGAGTGGGATGAAGTATAATGCTATCAAA  
ATCGGTGCTGTATAAAAACACAAGTCACTGGTGTTTCATCTAAATGCAAAAAGGAATGGG  
TGATCACTGTCTATACACAAAGACTTTCAAGCAACACAGAGACAAAGATGAATAATAATT  
ACCTTAGCAG

>7967 len=190 tot-seq=1

TTTGCAGGTGTAATTAGTTAAGATGAGATTATACTGGATTAGGGTGGGCCCTGACCCAAT  
GGGTGGTGTCTTATAAGAAGAGAAAGCAGAGACACAGAGACACGCAGGGAGAATGCCAC  
GTGAGGACAGAGTCGGAGACTGCAATGATGTGTCTCCAGGCCAAGAAATGCCAAGGACTG  
CCGGCCACCA

>7968 len=190 tot-seq=1

CCCGCCTCCTCCCACCACCTGCGTGCAGCTGACCGAGGAGAAGAACCTGCTACAGGAAC  
AGCTGCAGGCAGAGACAGAGCTGTATGCAGAGGCTGAGGAGATGCGGGTGC GGCTGGCGG  
CCAAGAAGCAGGAGCTGGAGGAGATACTGCATGAGATGGAGGCCCGCCTGGAGGAGGAGG

AAGACAGGGG

>7969 len=190 tot-seq=1

CACAGGGGCATCTGCCAGCTCCCCACTGTGGTTGGCATGATTTGGGGCAAACACTGTTG  
TGATGAGAAGTAGATGGATTGAGAGATTCCAAGCTGCCTCTCTATCCTCCAGATGCCTGG  
TGCCCTGAAGGGAGCCCTAGTGCTGAGTGTAAGTGGAGCAGCCTCAGCCCAGCCAGGACT  
AGACCAGGGA

>7970 len=190 tot-seq=1

AGAGAAAGAGAAAGAAAGCAAGAAAGCAAGAAGAAAGAAAAGAAAGAAAGAAAGAAAGAA  
AGAGAAGGGAAAGAAGGGAGGAAGGAAGGAAGGACCTGAAAAAGTGATTGATTTGGGAG  
GAGGGCATTCTGGCAGAGCACACAGCAAGTGAAGGGCCCTGGGGTGGGAGTGCGCCTG  
CCAGGCGAGG

>7971 len=190 tot-seq=1

GTGTGCTCTTCCGATCTCCTTCGGGAGGCAGCAGTGAGGAATATTGGGCAATGGGCGAGA  
GCCTGAACCAGCCAAGTCGCGTGAAGGAAGACTGCCCGCAAGGGTTGTAACTTCTTTTG  
TATGGGATTAAGTACCTACGTGTAGGGGTTTGCAGTTACCATTGAATAAGCATCGGC  
TAACTCCGTG

>7972 len=191 tot-seq=1

CCAGGGCTGTCATTTAGTGCCTGTCTGGTCCAAGTCAAGGTCTTGTTCCTTCCCATGGT  
GGGAGCTCCAGAGGTGAGTCTAAGCCACAGGGAGAAGCGGCAGCAGCTTAAGGCACCTT  
GTCTGTTCCCCTTCTCTCATTGTTTCTAAAAGACACCGATAGCCGGGCGTGGTGGCGCA  
CACCTTAATC

>7973 len=191 tot-seq=1

GGACCTCTTCCTTAAATTCTGTGGATTTGCCCTGCCCTTGGGGGGCCAACTTGATGGT  
AATCCAGCCAAGGAAGAAGGGTCAAACAGATCATCCTACAGAGCCCACTTGGCCAGTTGC  
TTTCTGGGACACTTGGCAGCAAGGAGACGGTTTCAGGGTTAGGCAAGCATGGATGCGTTC  
CTACTTGTGCA

>7974 len=191 tot-seq=1

CTGTCTCTAAAGAATCCACAACAAGCAATAGACTTTCAACTGTATCCAAAAGAAATCTGC  
TAACAGTGTGCAGTCCAGCTGGGGATGCAGCTCAGCTGGTAAAGTATTTGTCAAGCGTGC



GCAAAGCCCTGAGTTCCTGCCTGGCAAACACATAAGCCAGGAGTGGGGGAGGGTGGACA  
CACCTGTGATC

>7975 len=191 tot-seq=1

CCTGCCCCCTAGCCTTATCTATGGTCCAGACCCCTTATCATCAGCAACAAGGCTTGGGC  
CCGTGGCTCCCCGTGCAGGCCGCACCTGAGGGGCTTGCCTGGATGCACACCCGCTGGGC  
CAGGCCGCTCAGAAAGGCAGGTGGACTCTCTGCACCACATGCTGCACGCGCAGACGCCA  
CTTGACATACT

>7976 len=191 tot-seq=1

ATACTAGAGGGGATTTCTCTCAGACCCACTCAGCTGGGGTTAGCCTTCCCTGACAGGCCT  
TAACCTTTTTATAACCTTGATATCTGAAAATAGGATCCTCTCCCAACTCCACTCCCCT  
GGCCCTGTACCATATCACCAACTGCTAGTGGATTCTGGCTCAGGTTTGGGATCACCATGC  
TTCATGGGAC

>7977 len=191 tot-seq=1

CAGTGTTCTGGAATCCTGTGTGAGGAACAATCATTAGACTCGTAGCTGTGTTCTGGA  
ATTCCGTGTGATGGACAAACATTCAGACCCTCATAGCAGTGTCTGGAAACCTATGTGAG  
GGACAAACATTCAGACCACAGCAGGCATGTTCTGGAATCCTCTGTGAGGAAGAAACATTC  
AGACCCTCGTA

>7978 len=191 tot-seq=1

GATATCCCGCAATTTTCCAACCGGAGCAGCCACAATCGGCAGCCCCAAGCTCATGGCTTC  
TTGGGCGATGAAACCCCGCAGTCCCACTCCGAAGTAATCACCAACACGCTCGCTGCCTG  
CAACCAGGTATCCAAGGACTTGCGCCACCCAGGAAAGATACTTGTGCGTCGGTGCCGTA  
AGAACGCAAAC

>7979 len=191 tot-seq=1

CACCATGACCCCATCTCGCAGTGCTCACATCCTTCCACTCCACCCCAAGCCAAAGGTC  
CAGCAGCCAGTTAGACAGCATCAACCAAGGCCAGAGCAACAGGAGGAAGCCTGTATTCC  
AGACGTTTGGCTGATGCTCTCAGTAAAGGTGACTCTGATAGAACTCAGAGGGAAAAGTA  
AACCTCTTCT

>7980 len=191 tot-seq=1

CTGGCCAAGGCTGGAGCTGGCTCCCTCAGCTTGTGGGGAGGAGTGGAGGGAGAGGTGTGG

GCGGGAACAGGCAATGCCTGCCTGCTTGGGGGCCAACTAGAGTTCTGGGTGGGCGTGGGC  
TTGGCAGCCCCTCACTCGGAGCCGCTGGCCGGCCCCCCTGCCCCAGGTAGTAAGGGGCT  
TAGCACCTGGG

>7981 len=191 tot-seq=1

TGAGAGGTCCCCTCCAGAACAGTATGTGGTTCCAACTCCTGAGGGAGCGGGGGCAGACC  
GCAAGGAAGTAGATGAGAACCTGAATGAGGCTCTGTGGGGAGAGAGGATGTTCTCAGCC  
CTCACAAGGACATGTCAGTTTCACTTGAGATTAGGTCCTGGCCTTGGCTGGGCAGCCTGC  
CAGGCAGGTTC

>7982 len=191 tot-seq=1

CCAAGTGACTGGAGTTCAGACGTGTGATATTAAGATATAATAAGGGAGGAAGAAGGAGAG  
AAAATTAATAAATAAAGAAAAGGGGAGGTAGTGAAGAAAAATAAAAATAAAGGAATATTT  
AGAGGAGATGTAATTGGAATGAGTAACTTTAAATCCTTTAACGAGGATCCATTGGAGGG  
CAAGTCTGGTG

>7983 len=191 tot-seq=1

GCCGCGGCGCTGCACCTGGTATTCGGA CTGCGGTTGCGACTTGACGTAGCCCTGGTGC GA  
CAGGGTCACGATCATCTCCTGCGGCGCAATCAGATCCTCGCGGTT CAGGTT CAGAGCAA  
TTCGCTGATCTCGGTGCGGCGGGCGTCCGCTACTGCTCCTTGATCGCCAGCAGCTCCTC  
GCGGATGACCT

>7984 len=191 tot-seq=1

GAGTGGCCACAGCCCCCTGCAGGCGGCTGCCTCCACCTGTTCTGAATGCCCCACGCCA  
CACCTCAAGCCCTGAGCAGGAAGGAGCAGCCATTGTGCATTTCAAGGCATGTCCCACAT  
CTGTAGTTTGCAGAGAGCTACCATATTCCAGGCAATATTGGGAAATGGACAAGCTGGTG  
CTTGCCCTCTA

>7985 len=191 tot-seq=1

CCACTGTGTGCTCGGTGCTGACCTGCAGGCTTCCCACTGCTGGTCAGAAGCACATACTCA  
GTGGAAGATCATCTGGAAGCTTTGCTGAGCCCACCCTTGCCTTACCCAGAATTCACAG  
CAAGGCCAAACAAGCCCCACACCCATCCCTATTTAACTGTTTCATGCCTCTCCAGGTATTC  
CCAACGCCAGC

>7986 len=191 tot-seq=1

GAGGGAATCTCCACAATGGACGCAAGTCTGATGGAGCAACGCCGCGTGAGTGAAGAAGG  
TTCTCTGAGAGTAAAGCTCTGTTTTTGGTGAAGAAGGATAGAGGTAGTAACTGGCCTTTA  
TTTGACGGTAAGCAACCAGTAAGTCACGTCTAACTACGTGCCAGCAGCCGCCGTAATCA  
TTAGATCGGAA

>7987 len=191 tot-seq=1

TTCTCATGCCAGGCCTGCCTGCAACAGCAGTGCCAGTCTGGTTTGTTCGGCTTGTGGAA  
CTGTTTCTTCCCATCTCTAGAGAGCTGAAGCTGATTTCTATCAAACACCCGCTTTGCT  
GTCAGATGACAAAGCCTGTGGTTTGCCACATTCTGGGTCCTGAGATTTGAGAGGCTCAG  
ATGAGACACAG

>7988 len=192 tot-seq=1

TGATGGTTTCTTGGCATGTTCCCTGGTAACTTGAAGGTCTGTTGACTTCTTTATGAAG  
TTTCACTGTTCTTCAGCAAGTGTGGCAGTCTGGCTGCCTGCCACCTGTCCCAGCTGCC  
TGCCACCTGTTCCAGCTGCCTGCTGTCTATCCCAGCTGCCCTGCCACTTGTCCCAGCTGC  
CTGCCAACTGTC

>7989 len=192 tot-seq=1

TGGGGAATATTGCACAATGAGGGAAACCCTGATGCAGCGACGCCGCGTGGAGGAAGAAGG  
TCTTCGGATTGTAACTCCTGTTGTTGAGGAAGATAATGACGGTACTCAACAAGGAAGTG  
ACGGCTAACTACGTGCCAGCAGCCGCGGGATCGGAAGAGCGTCGTGTAGGGAAAGAGTGT  
GCCAATGTGTAG

>7990 len=192 tot-seq=1

TATAAACACCTTGTTATTAATGACTGGAGCTAAGACATCCAATGGAAAGGGAAAGAATTA  
GCATCAAAGATTTTATGGAAGGCAGGTTTATGACCAAAGAACTCTTTAATATCATCCTA  
AGTAAGGTAACCCAGACCCAAAAGATATGAATGTCAGGAACTTAGCATAATTGTACTCT  
GAGAGGCTCGAC

>7991 len=192 tot-seq=1

TCGAGGGCTCCTCTCCTAGGTGAACAGTGTGCCTCAAACACCAAATAACAACCCATCT  
CTAACAATCCCTTTGTAAAAGCTTGTCTTCCACAGGATAGTCACGGAGTGGAAGATAATT  
AGGCAAGGTTTTTCATCAATTCCATTTCTCTCTTTTTAAAGAGGGGAGAGGCAGCTGGGT  
AGCCATCTCACC

>7992 len=192 tot-seq=1

TGGAAGCCCATGCCTCCCTGGCGAGGTGACTTCCTCTTCTATCCCCTGGCTCTGCCTGTA  
CTCCGTCATCCACCCTCTATTTATCCATCCACCCATCCCTCCATTCACTTATTCATTCC  
TTCCTTTATACATGCAAGCACTGTTCACTTCTGTGCTATACTAGAGCCATGCAAGGCTGTG  
GGGAAGCAAAT

>7993 len=192 tot-seq=1

ATTGTGGGCCAGTGGGCATGCAGGCAGCTGCGCTCCCAGAATCTCCACACAGAACTCAC  
ACCTTCCACTAAAAGGGGCAGGGACCCACGAGGAATGATTGGGAATGAGCCTGATCCGGT  
AAGAACATCGAACTCAAAAAGAAATTAACCTTTGAATTACAAAAGTCAAAGTAGGGACCC  
AACTCCAGGCAC

>7994 len=192 tot-seq=1

GGACGGGGCGGGAGGGAGATCGTAAAGGGCGAGCGCCCTCTCCCGGCCGCGGAACGGGCA  
GGTGATCTGTAAGCCTCCCCGCTGGTCTTGGAGTGCTTGGGTGCCACCTCCATCACGCT  
CCATCTCTCAATTCGGTTTGAACCCGGTTTTCTCCACGCTCCCTCTCCAGGCGAGGCCA  
GCACCAGGTCCC

>7995 len=192 tot-seq=1

CCTGTGTTCTCGATGAGCATGTGCTGCGGTGGCCGGAACCTTGCCTGGCACCAGCGGGGA  
TGTGCAAAGGCCCTGGGGGAAAAGGCAGAGAGGCTGGCTCTGGACTCGGACAGGATGTGA  
TGGTCACCCTCCCTCTTGGTCTGGAGCCGCATTCCCCGTGTGGGTGCCTCTGCAGGGTC  
ACAGGATAGCAG

>7996 len=192 tot-seq=1

TAGGGAATCTTGACAATGGGCGCAAGTCTGATGGAGCAACGCCGCGTGAGTGAAGAAGG  
TTTTCTGAGCGTAAAGCTCTGTCATTGGTGAAGAAGGATAGAGGTAGTAACTGGCCTTTA  
TTTGACGGTAATCAACCAGCAAGTCACGGCTAACTACGTGCCAGCAGCCGCGTAATTCAG  
AGATCGGAAGAG

>7997 len=192 tot-seq=1

GAGGGTCACGGGCCAGGGAAGGGCCTCCTGCTCTGGCTGTGGTGTGCCAAGTCGGCGGGG  
AGCAGGGTGTCCAGGGCTGTTTGCTCTAACCAGCCTGCCTCTCCTCCCTGCAGAGTTACG  
AAGTGAGGAGTGTCTTGGAAAGGAGGTGGGGCCGTTAACCTGTTTTGTCCGGTGCATCA

CCACCCACCCGA

>7998 len=193 tot-seq=1

AAGATCCAGTTGCCAAGAATGGACCTCATATTCCTTGAGTTAGGAGAGATGCCTGGCTTC  
TTTGCCACGCCTGCCAGCCTACATTAGGCGAGCCTTGGGCCTCCTGCATGCAGCAGGGGA  
AATTAGAGCCAATCAAGGCGATTTCAAGGGCACTGCTCCTTCCCAGCAGCCTGTGACCAT  
GCCTGTTAACCAG

>7999 len=193 tot-seq=1

AGCAGATGCAACATTATTCCTCAGTCAAGATGTTTAAATTATGTTTTGTTTTGTCTTCCA  
TTAAGTGCAAGTGAATGTGTTCATATGTAAAATATCTCTTGCTGAATGTGGACAGTTTAC  
ACACTTAACACATATTCTTTCTAAAATTACTCTGTACATAATAAGCCAGGCATGGTTGTG  
CATGCCTGTAATT

>8000 len=193 tot-seq=1

CGAGTTTAGGATTTTGTCTGTTTACTGTTCATGTACACAGTTTCTATGCTACCACATGGA  
GCAGCTCATGGATTTGATGGTAAGAACAAGCTTTGATTCCCATTAAGATCTCTAAAA  
GTGGGGACTGCAGAGATGGCTCAGTGGTTAAGAGCACTAACTGCTCTTCCAGAGGATGCA  
TGCAGGCCAATTC

>8001 len=193 tot-seq=1

AGGCCTGTGGGCAAACAGTGATGAGAACGTTTAAAGGGTGTGTGGAAACAGACAATAAGGA  
TGGAGCTAAACACTAAACACAAGATGAAGAGCACCCCTTTCTTTCATGACGGACAACAAA  
ATTCTAGCACCTCTGAGTAGCAGAGGCTGTATACTGTAGGACCTCCAGAGGCCGCATGTC  
AGTGAGGAACGTT

>8002 len=193 tot-seq=1

TAAGACCATGACCCTCACCAGAGTGCAAGCCCAGACATTACCCTGGAGCCAAGTGGCAGC  
TGAGGACACTCACATCAATATGGCCCATGGTGGCAACATTGCCAGGAACATCAGCATGT  
CTTCAGGCTGCAGCACAAACAGATATCCACATGGCCTTAAATGCCAGCTCAGTTCATGGC  
CATCAACACAGAC

>8003 len=193 tot-seq=1

CACAGGGAACACTTGACATAAAGGATTTTCTGTGAGTCACGATCACTACTTGACACACAGA  
GGGGAGTCATGCACTTAGGAAAAGGCAAGTAACTGAAGTGATATGAAAGTATTTGAGAGC

ACACATTTCCACTGAGACTCTGGACTTCCCTGTCCTATAGCTCCTTCTCCCAACTCC  
TATACATTAGTAT

>8004 len=193 tot-seq=1

GGGCCTGATTGACGGGCCAAGAGGCCTGTTGAAGCCGACCCTCTGGCAGGTGAAAGCCAA  
TGGGAGAGGGGCAAGAGGAGCCTCTCGTGGTCAACCCCCGCCGAGGAGCTCCGCGGGAG  
TAGGCCCCGGGAGAGAGTGGGATAAGGAGTAACTTTCTCCCGGCACTCCTGCCCGAGGAA  
GCCTGAGAGAGCC

>8005 len=193 tot-seq=1

ATAAAGTGGTGAATGGAGTTAAGAAGTGTGATATTAAGATATAATAAGGGAGGAAGAAGT  
GGGAATTTTAAAAATGGGGAAAAAATGATGGAGAGAAGAAGAGTGATTTAGAAGGCC  
TTCGGGTTGTA AAAATCTTTTGTATGGGAAGAAAATGACAGTACCATACGAATAAGGACC  
GGCTAATTACGTG

>8006 len=193 tot-seq=1

GTGATATTAAGATATAATAAGGGAGGAAGAAGTAGGGAATATTAGGAAATAGAAGAAAGT  
ATGAAAGAGAAAAGAAGAGTGAGTGAAGAAGTTTTAGGATAGTAAAAATATGTTGGTAG  
AGAAGAACGTTGGTGAGAGTGGAAAGCTCATCAAGTGACGGTAACTACCCAGAAAGGGAC  
GGCTAACTACGTG

>8007 len=193 tot-seq=1

CCCATCAGTCTGATCCAGA ACTTAAGCCTTTGCCCACTGAGCTCCAGTTCTACATTTCTA  
TGGCTTAAAAACATGTAGATATTCAAAATCCTAAATATGATGGAAGGAAGATCATCAGTA  
AGCAGCTTATTCAAAGTTATGGGGACTGAAGACAAACGGAAGAGTAAATTAAGTGAAA  
AAACATAGATGGG

>8008 len=193 tot-seq=1

CTGCCTTGAGGTCCTGGGGGCAGTTCACGTGGGTGTGTCTGGCAGGACATGGCAGTCCC  
TGGCACTCACTCTGAGAGGTGTCATTTCTCCAATCCTTCTCCTGTCCCCTGCAGTCCCA  
GCAGGGCAGAGGCTTCTAAGAGAGCGGAAGCACTAGACGTGTCCGCAAAGGGAAGCCTTG  
TAAGCTTCAAGCC

>8009 len=193 tot-seq=1

CAGGAGGGCCAGGGGGTCCAGCATTCCCTGGATGAGGATAGGAGGGGCTGTCAGACTCC

AGGGGGCTCTGGTGCATCATTGGGTCCTCAGTCAGCCCCACCATCCTTCTGGCAGCCCC  
ACCCAGCACCCCCAACCTAGAGCAGTGGACTCTGCTGCAGAGACTTACAGAGGGGCCAGG  
AGGACCGACTCGG

>8010 len=193 tot-seq=1

AAGGGTAGTGTATGCAGAGGATTTTATTGGGTGATGGCTCTCAGCAACATGGGAGCTGGA  
AAGGGGATTGTGTGGGAAGAAGGTGATCTTCCCTGAAGCCGCACTGTCTGAAGTTAGCT  
GCATCTATCCATAGTCACCAACGCTCAGTTGCTGCTTCTCTGCTCACTGCTCAGCCTCT  
GTATCCCCAACTC

>8011 len=193 tot-seq=1

AACATGTTACTGTAGTAGACCTACTTCGTAATGATTTAGGATTAAATGCCAATGATATAA  
GAGTGGTAAAATATAGATATATAAATAAAATAGATACTTTTCAACGTTCTATTTTGCAAG  
TCAGCAGCGAAATAAAAGGTACACTTGAAGATGATTGGCAAACACGATTGGGGGATATTA  
TTTTATCTATGTT

>8012 len=193 tot-seq=1

GCAAGGTGAAACCACTAGGCAGTTACACTTATCTCAGAGAAGTGAAAATTCAGTGTGCC  
CCCTAAATAATAGCCCCATAATGATGTACACATCCTAATCCACAGAATTTGGGAACACAT  
TACTTCACATGGCAGAGGCTTTTTGCAGAGGTGATTAAATTAGGTGGATTAATGAAGCCA  
AAAGCAAGAAATG

>8013 len=193 tot-seq=1

GACAGCCGAGGGTAGAAGCCACCGCACAGCATCTCTCCCCACTCAGCAGCTCCAGCTGG  
GACATCATCCTCCTGTCTCTCCTTTTCAGGCGCTTCGGGGGGTCCCATTCAGGCACCTT  
CTCCTCCTTGCTCCGCTCCCTTCGTTTCTTCCCAAACCTAGCATCTCCTTCAAAGAAG  
CCCAGAGCCACGG

>8014 len=193 tot-seq=1

TCAAATGATCCATTGGCATCAGCCTCCCAAAGCGTCGGAATTACAAGCATGAGCCACTGC  
GTCCAGCCCAGATGCTTAGCAGAGCATCCCATGTGACTGCTGTGGCAAGAACATATTTGG  
GGACCACTGACCAACGCACAGGCTGTTCCCAGCCTCGCAGTATCACAGGCCTGAGCCCC  
GTCTCCCTTATGT

>8015 len=193 tot-seq=1

AATACGAAGTGCAGGGAAAGACGCCAAGCACAAGGTCACATATCGCCAGGCCACGTGTCTG  
CCAGGCCACGTGTACCAGGCCACGTGTCATCAGGCACCACTGATGTGATGTGTCCTGAA  
AGGCAAGCCCATGGAGATGGGAAGTGGAGGAGTGGCAGCGGGGGTGAGGAGGCTGGGGCG  
GTGGAATGACTG

>8016 len=194 tot-seq=1

CCAAGCAGAGTGTCTGCTGAGTGTGAGGGTCTAAACTGGGAATGGAGTCCATGCTG  
ATTAGACCCCTAAGCTGTGGATCATTATGCACCATGCACATCCTGATCCTGGGTAGCAG  
CACCTCTCTCAAGCCCTACAAGGCTGGAGCACTACCTCTGTGGGGGAGCTTACTCA  
GCGATGTCCCCTGG

>8017 len=194 tot-seq=1

AAGTCTGTAGACCGCAGAAACCCAGGATGGCTGCATGGAGAAGAGGAGGAATCACCATG  
CCTCTCCACTTCATTCCCCTAATTAAGGTCAGCTCAGAACCAGAAGGAACTTCTCCCTG  
TGGAGGAAAGGTAAGTAGACGAATAATCTGCATAAGTGACGGTACCGAAAAAGCAAGCCA  
CGGCTAACTACGTG

>8018 len=194 tot-seq=1

TTCCAGTGAGCCAAGATCACCACTGCACTCCAGCCTAGGTGACACAGCGAGACTCTGT  
CTCAAAAAATAAAAAATAAAATAAATAAATAAATAAATAAATAAATAAATAAATATGCT  
GAGAGGCTCACATACTTCTGTACAATAAAGACCTATAATCATATAGGAGACGGGGAAA  
AAAAACTAAATCAT

>8019 len=194 tot-seq=1

TGTGACTGAGGGATGCCACCCAGGGGATTACCTGGCTGGGGCTGAAGCAGAGGGTGGGG  
CGGAGACCCGAGGTACCACCGCTAGGCCTGGGGCAGAGTGATCCAGTGAAGGTTCTG  
AATGGAAGAGAGATGGGCTCCTCTGCCTCCTGTAGCTGTCAGGGGCTGTCACAGGCAGCC  
CTGCCAGCCGGCC

>8020 len=194 tot-seq=1

GGAGACCGTTCTTCTTCCCGTGAGGAACATGCTCCAGGGTCCGGAGTCTACGGAAAAATA  
GGAGGGTTTGAGAAAGTGAAACCCGTTCAATTTCTGTGGAGCAGAATCAGCAAATGCTGT  
CTCGGGGGGCCCTGTGGGCCTTGGGAAGCATTTTGGACTAAACCAGAGGATAATGAGACA  
CCTGAGGTTTA



>8021 len=194 tot-seq=1

GTCATTGGGGTCACTCCCAGCTGATGGCTCTTTCCTCAGCGAAGTGGAAGGTGAGGACCT  
CTGCTGGGCGTGAAGGTGGCAGGGAAAGTCTGAGCAGAGTGAAGGAAGTCTGAAATGGGT  
CCCATGAAGCAAGGCAGATTTCTGAAGGGGCCGAGAAGCATCGTGGGCAGGCCGAGGCC  
TCTGAAGGCTGCGG

>8022 len=194 tot-seq=1

GCAATCTGGGTGACCCGCTGATGACACTCACACCAGAAGCCCGTCTGTGCTGAAGCAAAT  
CAGCGCCAGCACTGCCAGCCATTGGCATCTGTGAAGGGTGTGTCTGTGTTGTCTCAGTC  
TGGTGGCCACAAAAGCCAACCTTGAGATGATGACTCAAGGGCACATGCATGTTTTGAGGA  
GGTGACGCCCATGA

>8023 len=194 tot-seq=1

CCTAAAGAAAGCTTAGGTCTGAAACAAGTTATGTTTCATCTGCATGATTTACTCCATGTAG  
ATTCCAGGCAGTTGCCAGACAGGAGCAGGAATTGCACTCAGTGCCAGCTGGCCCTGGGGT  
CTGCAGTGAGGCAGAAATCAATTGAACTGGATTCTTGTAAACCCTCTCTTCAATGGGGCC  
TGTCCCAGCCAGA

>8024 len=195 tot-seq=1

ATCCAAACGGATAGATCTACAAAACCGTCCCAGACACACCTAAGGCTCAGACAACACTCC  
AGTAGACCAGGCAATAAGACTGTAAGAGGCTCAGGGAGTTTGCAGTGAGATTATGACTCC  
TCGGAATGTCACAAATGACACCATAAAAAGTCTACCAACGTGACTGCACAAATAGGAGC  
TGAACAAGGACACCA

>8025 len=195 tot-seq=1

ATAGATGCCCTTTGCCCTGTTGCTGTTCTTGGGTGTTGCTGTAGAGCTACTCAACTATT  
AGAGCAGTGGTTCTCAAACCTGTCTCTCTGTTAAGATAAAAATAAACGGGGTGGAGAAG  
ACAGGCTAAAGGAAGCCATAGGAAGATATTCCTGGTAAAAGATAGCTGCAGCCTTTGAG  
ATCCGCCCTTGATTT

>8026 len=195 tot-seq=1

GCCATCTGCTTCATGGCACTTGCTGGCCAGGAAAGTCAGTGACTCTCCATTTCTCTTGA  
CCAAATCTGAATTCCTTTTCTAGCATGGGCGGTCTTGGGCTATTGGGACCCACCCTACC  
CCGGCTATATTTCCACAGCTGCTCAACACACACACCCTACCTTAGGTTGGGTCCTCTTC

GCTTTGCTTCCTGAA

>8027 len=195 tot-seq=1

GCATGGCTATAGGCTTATATTTTTCTAAGCCTACTCTAATAAGTGTTTTCAAATCCCTCC  
TAAACCACCACCCACCAGAGGTAGTAGAAAGGCAAGGTTAATAGGGCAAAGGAGGATGTG  
GACCTGTTTGAAAGAGTTCTTTGGAGTGAATCCAATCTGCCTTGTGAGGATATCGGCAG  
CTCAGTTCACACAAA

>8028 len=195 tot-seq=1

GTCTAGGGTGCAGGAGCTTATCCCGTTTAGCAGGAGCTTAGCGTTTTCCAGGTAGAGGGAG  
GGAGGATTACAAGGGGATGTTGAGCCTTACTGGATGGAGCACTTAGGCATTTGTATCTGA  
CTGAACAGGAAATTGGGAGCTGTTAATGTGATTGAACAGGTGAGTGACTCAACAGGTGCT  
CGCTTTTCGATGACT

>8029 len=195 tot-seq=1

TAGACCAGGAGTTAGGATAGCTCTCCAGGGCTGAATGCCCCGTCAGTTCTTGTCTGG  
CTCTGTGTGACCTTGGGCCAGTCACTTCCCCTCTCTGGGACTCAGGAGCAAAGACAGAA  
GCAAGACATACATGCCTTCTGCAAGCTCTGGACTATGCTTCTCCCTACAGCACATTGGAA  
GCATGGAGGTCTCCG

>8030 len=195 tot-seq=1

CAGGACTGTTACTCCAGCAAGTTCTTGAAGCACTGGGACCACCTCACCCAGGTCAAGAAG  
CCAGTCATCGCTGCTGTCAATGGCTATGCCGTGAGTGTTGCTGCCAAGAGTCTCCTCCTC  
TCGTGGTTGAAGGGACCGTGCTGTGCATACACAGCATAACAGATTTTTATTTGAAGAGG  
CCTTTAGTTCCCAGG

>8031 len=195 tot-seq=1

ATAAGAGAGTGACTGGAGTTCAGACGTGTGCTTCCGATATAATAAGGGAGGAAGAAGG  
AGAGAAAATTAATAAATAAAGAAAAGGGGAGGTAGTGAAGAAAATAAATAAAGGAAT  
ATTTAGAGGAAATGTAATTGGAATGAGTCCACTTAAATCCTTCCGCGAGGATCCATTGG  
AGGGCAAGTCTGGTG

>8032 len=195 tot-seq=1

ATAAATAAAGAGATGTTCAACATTAGTGTAGGCCGGGCGTGGTGGCTCACGCCTGTAATC  
CCAGCACTTTGGGAGGCCAAGGCGGGCGAATCGCCTGAGGTCAGGAGTTTGAGACTGGCC

TGACCAATATGGTAAAACCCCATCTCTACTAAAAATACAAAAATTAGCCAGGCATGGTGG  
TGGGCACCTGTAGTC

>8033 len=195 tot-seq=1

CATGCTTCAGATTCTCCATCCTTCAAGGCTCCATTCTCCATAGTCTGGTTCTGCCGGGG  
TGTCTCTGTAGCCCTGATCCTCAAACGTCATCGAGCCTCCTGAGCAATGCCAACCCGAT  
GTCTCACTGATTCTTTTCGCTCTTCTCTCATGTTTAGGAAGATCCCTCCTGCGGCAGAT  
AGCCCCCTGCCCTCG

>8034 len=196 tot-seq=1

GGGCAGGAAATGGGGTTCGAGAGGCCTAACAGGTCCTCAGCCACATAAAGTAACAGGCT  
GTGACCTACTGAGGCCACAGCGACAGCCACAAGGGAAGAAGGCTGGGAAAACACTAATGG  
GCAAGAAAAGATCCTAAACCAGTAACAAGGAGGTCCGGCAGCCCAAGACTCAGCTGCCCT  
TCCTTCCTTAACAGCT

>8035 len=196 tot-seq=1

TATTTACACGCAATAGCAATATATGAGGAAACGCGTAACAGAATGCTTGGGGGAGAAAGA  
GAGAATGCAAATGTTACTGGAAGCTCTAGGCACAACACCGGTTTGTGAAGACCTGTCT  
GAGTTTTACAAGCCGTTTACTCTGTCTGCTACCCAGTATCATTCTGCTACCTCATATG  
GGCTGTCTCAGAGTCT

>8036 len=196 tot-seq=1

AGTGCAAGTGCTGAAGCAGATGGCTGTTGACAGCGTGAACCCAGGAGCTGCAGACGAGG  
TTGCCCTGGAGACATGCTCAGCTTTCTCAGAATCTGAATGGAGAGCTACCCCGCTAATGG  
ATGAAATCATCCGTTAAGAACAGGTAAGGGGAAAGTCCACAGCATAACAGCAATAAGGAG  
TAAATGAGGCAGAAAA

>8037 len=196 tot-seq=1

AACATTAAAAAAAAAAAGAAAGAAAAAGCATCCTCTACCCCTGGTTCAAGCAGGCATCTTG  
GGAGACAGGCAGAGCTCTGTGGTGTGTGGTGGGCAAGCCAATCAAATAGAGAATTTAAGG  
GAGCTATGGATATGGAAGGAGACTGGACTCAAACAGTACAAGACAGAACCTCACAATTGC  
TGGGTTCTGTGGGGTT

>8038 len=196 tot-seq=1

CAAAGTGTTAACTCTGAGAATGAAGGGGCAAATAAAAAAGGACACTTGTAAGCAGACCCT

CCATTTGGGAGAACCTTAATTACAGGTTGTTAGTTGCAGTGGAAACCCAGGCTGGGTGGC  
CCTCCAGCTCATTGTCTTGCCCCTTTTCTCTCTCCCTGGGTGGGTCGCATGGGTGAGAGA  
TTTGGCCCCACCCAAC

>8039 len=196 tot-seq=1

GGTTGTGAGATAACAGGGAGGAGTGGGAACCAATTGGAAACCACGGGCCACCTGCCAGCT  
TCCCCATCTAGGGGCGGGTCTGTGCCCTGGCCTCAGTTCTGATTTGTCTGAATGTCTTGG  
AAGAGTGCTTTGATCTGCAAGATGAGGGAGGGCCAGAAGTGGCCATCAGACCCCTAGTCC  
TGAACAGTAAGAGCTC

>8040 len=196 tot-seq=1

TAAATCCCATTCTGCTTAAATCACTATGTCAGTTTGCTTTGCCTACACCATATCACCT  
AAAATCAAGTAGTGTAACAATCACCATTATCTACCATGGGCCATTATTCTGGGCTGG  
GCTTGGCTGGGGCTGCCTGATGTAGGATGATCTTAGCTGGGATGGCTCATTCTGCCCA  
TGTAGCCTGTCACCT

>8041 len=196 tot-seq=1

GGGAATATGAGGCTGGAGAGGAGTCCGACGAGATGGAGAGGGTGGGGGAAACAAGACTGT  
GGCCAGGAGGGCCCCGTGAGGACCACTCCACCCAGAAGTTGGAATGAGATTTTATGGG  
GCTCAAAGTCAATTGAATGAATGAATGAATTTTGTCCCATCTGAAAATGCAAAAAGTGA  
CTCCCCCTGCCTGGCA

>8042 len=196 tot-seq=1

AAAGGAGGAAAAGGCTTCCAAGTACAAGTCTCTATGTCTACATGTGCATGTAAAGAAAGC  
GATGGCAGAGGAAGGACAACGTTGAGGGTTAGGGCAAGGGACAAAGACTGACATATGCGT  
GATCTCTTAGGGGAAAGGAGTAGAGCAATTTGGAAGTGAATTTTCCCTGGCCCAACCATC  
AGGAATTCAATTAGTG

>8043 len=196 tot-seq=1

TTCAGACGGGGGCGCGGCCGAGAGCCGACGGGAGGCAGCAGGGAGGAAGAGGGGCCAAGG  
GACGGAAGGCGGAACCAAGGAGCGGGCAGGAGGACGGCCCGAGGGGTTGTAAACTG  
CTTTGTATGGGGATAAAGTTAGGGACGTGTCCCTATTTGCAGGTACCATACGAATAAGT  
ACCGGCTAATTCCGTG

>8044 len=196 tot-seq=1

GGGGGACGGGAGGTCAGACGGGGGCGCGCCGAGAGAAGAAGGGAGGCAGAAGGGGGGA  
AGAGGGAGAAAGGGGGGAAAAAAGGAAGAAGCGACGCAGCGGGCGGGAGGAAGGCCGGCG  
GGGGGAAACCGCGGGGGAGGGGGAGCAAGCCTTCGGGTGAGTGGACCTTTCGAATAAGC  
GCCGGCTAACGACGTG

>8045 len=196 tot-seq=1

GGGGATAGGGTGTGGCCAGGAATGTGGAGTGGGCCAGGGTCCCAGGGGCTGGGATCTCT  
CTCCTTGTCCATGGCACATGCCTAGGCTTGGTCAGCATGTTGATGTATCTACGGAGCTCA  
GCTGTGTACTGGGCCATCTGCTCCGGTGTGGTATTGTCCCCTGGGTACAATGGCTCCAAC  
GGGGCTCCCCGGGCAC

>8046 len=196 tot-seq=1

CCAGGCTCAGCAGCTGGACGAGAGTGCAAGGATTCAAATCCAAGGAGGGGTGAATTCAGG  
GCCTGTTCTGAGCCTGTACTCTCTGCTCTATCAGCTACCTCTGGAGGCTGCCTAAAG  
CAGCTTCCCCTCTCCTTTTCTTCGCAACCCTAGGAGGAAGGTAACGAGTTAAAATCAGC  
TGGCATCGGAGGCCCT

>8047 len=196 tot-seq=1

AGCAGCAGTGTCCATGTATGCACATGCACCAGTAATTGCAGTGTAATGGAATCTACCTGC  
ATGTATATGGGGTGGCAGTGCAGTGGCACAGCAGAGTTAGCATGCACACTTGGGTACTG  
GTGGCAGTGGGGTGGTGGAGACCACATGTGTCCACTTGTCCAGTGATGGCATGGCAGTGA  
GGTCTGTGCATATGCA

>8048 len=196 tot-seq=1

TGAGGAATATTGGTCAATGGACGAGAGTCTGAACCAGCCAAGTAGCGTGAAGGATGACTG  
CCCTATGGGTTGTAACTTCTTTTATATGGGAATAAAACGTTCCACGTGTGGAATTTTGT  
ATGTACCATATGAATAAGGATCGGCTAACTCCGTGCCAGCAGCGTTAGATCGGAAGAGCG  
TCGTGTAGGGAGAGAG

>8049 len=196 tot-seq=1

CACCATGTTAGCCAGGATGGTCTTGATCTCCTGACCTTGTGATCCACCCATCTCGGCCTC  
CCGAAGTGCTGGGATTACAGGCGTGAGCCACCGCGCCCGGCCTGAGAATCACCCATTTT  
ACGGTTGGGAGAATCGAGGCTCAGTGGAGCAGGTGTACTCTCCAGGTGACACAGCAAGA  
GACCCGGGTTTTAAGG

>8050 len=196 tot-seq=1

TAAGGAAGATAGCTGAAATACGTCAGCTTGTGAGAGGGTCAAGGAGAGACATGAAGTGGA  
AGGGGATAGAATGCGTTGGAGGCACGGCAGTGCCACGTGGGTGTCTGGAAGGGACTTGCC  
GAGCTGGCAGGTGAAGACACAACCTGCAAGAAATGAGTGAGTGAGCCATGCGTTCACCAAG  
GGAAGAGCCTCCAGCA

>8051 len=197 tot-seq=1

TAGCCATCCTTTGTACAAAAACAAAAACAAAAACCCCTTGACCTTTGAGAGAAAACC  
CCTAAGACTACTCGTATTGAGGCGATGTGGCTGATGCCAACAAGAACTTCACAAGGGCCC  
TGACAGGGGAGACCCTCACCTTGAGGTGGAGTCTATCACTGAGACTGTCCGGACCCAGA  
CCCAAGACCCTGTCTGA

>8052 len=197 tot-seq=1

CCGGGACCCTCTCTTAAAAACCAGAAGCAGCAAGGAAATGGTACAAACGCTGAGAGTGTG  
GCTGAGCTGTGGCGTGGGTAAGGCTCTGGACCCAACCCCTAGCACTGAACAAGAAAAGAC  
AACTGAGATCTGGGCCGAGCGACTGCCTGTCTTCAATGGAAGCACAGTCAGCCCTGACC  
TTTTACCTTTTCAGTG

>8053 len=197 tot-seq=1

GGGTTTCTAGTGTTTCATCTTTGGGAGTTACTACACTTACCCATTGCCTCTTCCCACTTCC  
CAGAAGTGCATCCCATTAGTTAGTTCTGAAGTTCATGTGTACAGTCCCTTCACCGCAAGT  
GTCACCAAGCCACCTACAACCTGGATATGACACTTGTGCTCCCTGTCCTGTTAAGTTACCC  
AGAGTTTGTCTTAGAG

>8054 len=197 tot-seq=1

TGATACGTTTGAAGACACGTTGTTGCCGTATTCTGGAGGTTCTGGTGTTCATACCAGC  
ATTCTGTGAACAGCTCAGAAACCAAAAAGGAAATCAACCAGGCTAGAGTGCACAAGTCTT  
CACGAGGACCTCTAGTGGCTACCCAGTAAGCCCTGGACTTACTGTGGAAAGTGCTCCACC  
CTGGCAAGGGATTTAG

>8055 len=197 tot-seq=1

CCTCACCTGGGAGCTCATTAGTCAGTTCAGTCGCTCAGTCATTTCTGATTCTTTGCAAC  
CCCATGAATTGCAGCACGCTAAGCTTCCCTGTCCATCACCAACTCCCGGAGCTTGCTCAA  
ACTCATGTCCATCGAGTTGGTGATGCCATCCAGCCATCTCATCTCTGTCATCCCCTTCT

CCCGCCTTCAACCTTTC

>8056 len=197 tot-seq=1

TGGGGAATTTTGCACAATGGGCGCAAGCCTGATGCAGCGACGCCGCGTGAGGGATGAAGG  
CCTTCGGGTTGTAAACCTTTTTCGCTCATGGTCAAGCCGAGCTTTGGGTTGTGGTGAGG  
GTAGTGGGTAAAGAAGCGCCGGCTAACTACGTGCCAGAGCCGCGTAATCCCAAGATCGG  
AAGAGCGTCGTGTATGG

>8057 len=197 tot-seq=1

TGGGGAATATTGCACAATGGGCGCAAGCCTGATGCAGCGACGCCGCGTGCGGGATGACGG  
CCTTCGGGTTGTAAACCGCTTTTGATCGGGAGCAAGCCTTCGGATCGTAAAGCTCTGTTG  
TTAAGGAAGAACGAGTGTGAGAATGAAAAGTTCATGCTGTGACGGTACTTAACCAGAAAAG  
GGACGGCTAACTACGTG

>8058 len=197 tot-seq=1

TTCAGATGATCAGTGTAGCCTTACAAATTGTGGCATTGAATCTCTGCAGTCATAGGCGTC  
CTTCAGCGCTGGTACAACAAACCCAACAGATGGCCCCAAGCCGTGCCTAGGATGGGAGG  
GAACCTGGGAGATCAACCTAATCCCAGGAAGTGGTGTGGGCTCCAGGGCATAAGAGCCC  
CATGACATACACAGGAG

>8059 len=197 tot-seq=1

AAGTTTTTTGTTGTTGTTGTTGTTGTTTGTGTTTTGTTTGTGTTTTCTCTTGTTCAAG  
GCTAATTCCTTGATTCCATTTTTGTTGTTGTCTTCTGTTTGTGTTGTTTTTTGGTTT  
GATCATGCAATGGCATGATCTCAGCTCACTGCAACCTCCACCTCCCAGGTTCAAGCAATT  
CTCCTGCCCCAGCCTCC

>8060 len=197 tot-seq=1

GGGCATACGCACACACATGCACGCTCCCATCAGAGAATGAAAGGAACGTGATTCTCCACC  
CTGATAACACCCAGGGGCTCTGCCAGCTTTGAGATGCTCTCATTGGCACTTAGGAAGGT  
TTTCAGACCACCAAGGCATTCTTTTAAAGTAAACAGACAGTAAACAGACAGTAAAGGTGG  
CCCGGTGAGTGAGTTGG

>8061 len=197 tot-seq=1

TCAGACTTGCGTCCATTGACCAATATTCCTCACTGCTGCCTCCCCTAGGAGATCGGAAGA  
GCACACGTCTGAACTCCAGTCAAGTAGCGTGCAGGATGACGGCCCTATGGGTTGTAAACT

GCTTTTATATGGGGATAAAGTGGGGAACGTGTTCCCTTTTGCAGGTACCATATGAATAAG  
GACCGGCTAATTCCGTG

>8062 len=197 tot-seq=1

TAGGGAAGTTTTACAATGGGCGCAAGCCTTATGAAGCAGTGCCGCGTGAACGATGAAGG  
TCTTATAGATTGTAAAGTTCTTTTATATGGGAAGAAACGCTAAGATAGGAAATGATTTTA  
GTTTGACTGTACCATTTGAATAAGTATCGGCTAACTATGTGCCAGCAGCCCGCGGTAATC  
ATAAGATCGGAATAGGG

>8063 len=197 tot-seq=1

CAAAGCATGCGAAGAAGGCGTAGGGTCCCCAGCAGAAGCAGAATGCCAGGACCATCACCA  
CCACCATGCGCGTCACTTCCTTCTCTGCCTTCTGGGTGGATTGAGACTCTTTCTGCTGCT  
TTGCCACCTAAGGGAGACAGGGATAGTGAGTCGGGGGTTGGAGGGCAGCAAGAGGCAGGT  
GACCCAGGCATAGGGAG

>8064 len=197 tot-seq=1

TTGCTGCAGAGGAGTGAGGAGAGCTGCCTGGCAACGCAACGCATCGCTGTGCATAAACTT  
TGTTTACAGCCAAGGCTGGAGTAAAGGAACAGATGGCAAGAAAATCGGATTTAAAGAAAG  
GAAGGATGTGCTTGCATCTGGGAGCTCGGTAAATCTCTTGGCTTCTGGTGTGCGTACAAG  
GGTGACGTCTAGCTACC

>8065 len=198 tot-seq=1

GGAGTTCAGACGTGTGCTCTCCGATTCCCTACGGAGGCAGCAGTGAGGAATATTGGTCAA  
TGGGCGAGAGCCTGAACCAGCCAAGTAGCGTGCAGGACGACGGCCCTATGGGTTGTAAC  
TGCTTTTATGTGGGGATAAAGTGCCTGACGTGTCATGCATTGCCGGTACCCAATGAATAA  
GGACCGGCTAATTCCGTG

>8066 len=198 tot-seq=1

TAGGGAATATTGGGCAATGGAGGCAACTCTGACCCAGCCATGCCGCGTGCAGGATGACGG  
CCTTCTGGGTTGTAACCTGCTTTTATCAGGGAAGAAAACGCTCCTGCGGGGGTAACTGAC  
GGTACCTGAGGAATAAGCACCGGCTAACTCCGTGCCAGCAGCCGCGTAATCCCAAGATCG  
GAAGAGCGTCGTGTATAG

>8067 len=198 tot-seq=1

ACAAGTTAGGGAAGAATGACTTTCAAACCATTCGGGGTTTTGAGTGAAGCCACTGGGAGA



AGGGTTTAGTGGGAAGAGACACTGGGGAGGACTGTGTGGTTTGAGATGGTGGCTGGATCC  
ATGCACTTGCATCTGGCTTTTCTCCTAAGGAGACAGTGTGTTTTCTGAAAGCCGCTCCT  
GTCTTGGCAACTGGGTAC

>8068 len=198 tot-seq=1

TGAGGAATATTGGTCAATGGGCGAGAGCCTGAACCAGCCAAGTAGCGTGCAGGATGATGG  
CCCTATGGGTTGTAAACTGCTTTTATATGGGGATAAAGTGGGGAACGTGTTCCCTTTTGC  
AGGTACCATATGAATAAGGACCGGCTAATTCCGTGCCAGCAGCCGCGAATATTCAGATCG  
GAAGAGCGTCGTGTTGAG

>8069 len=198 tot-seq=1

GCAGCGAGGGAGGAGGAGAGGCCCCAGGTGAACGGAGGGGCTTGTCCAGGCCGGCAGCAT  
CACCAGAGCCCAGGGCAGGGTCAGCAGAGCTGGCCGTAGGGCCCTCCTCTCAGCCAGGAC  
CAAGGACAGCAGGTGAGCCGGGAGCAGAGCAGCGAGGGTGAGTGTGGCAGCAGGACAGAA  
GGGTGGAAGCCAAGGAGC

>8070 len=198 tot-seq=1

CTCCCAAATGGCCTGTTCCAGACACCTAGTAACTGGCAGACACAACCAGATGGAACCATT  
GCCAGGCCCTCCTGAGAGCAGGAGAAGGAGGGAGTGCAAACCCCTCCTGGCTGAAGTT  
TGCTCTTGCTTGATTTTTTCCAAGTCCAGCCCTGCCTTGAGTGGGCTGGGGCTCGGGCA  
CCCACCCAGTTTCTACCT

>8071 len=198 tot-seq=1

GGGAGAGAAGGAGAAAGAAGGAAGAACAAGGCATCTGGAAATTAGTTCTTTCTGGCAAGA  
TTTTAGTTTCACTCTGAAAACCTTTTTTLAGAGCTCAAATGGCTTACTCTCCTTAAAGCT  
GGGTCTCCTTAAAGAATCCATCCTTGTCCAGGGCATTATAGGGCAGCGCAAGTGTGAGCT  
CTCCACAATGGAGTCAGC

>8072 len=198 tot-seq=1

GACAGCCCTGATGAAGCTCGGCTACTGCCCCACTTCACAGAGGGTGACACCAAGGCTCA  
GGACGGCAAAGGCACTTATCTGAGGTCCTAAAGCCAGGAAGCGGCAGAGCCGGAGTTGTT  
GTCAGGCCATGTGGAATGTGCTGTCATCCTTAAACCCAATAGTCCTAGGCTGGGTGTGG  
TGGCTCACACCTGTAATC

>8073 len=198 tot-seq=1

CCCTTGGTTCCTTCTCCCAATTCCTGTGACCAGGAGCTCTCCTGCCAGGGGGTAAAGA  
ACTGGAAGAGGAAGAGGAGGCCTCCCCCTCAGCCTCAGCCCCGTTTCATGGAGGGAGATGA  
AAGCTTGTTCATGTTCCCTTTGAAAGCGCTGGCAGAGCCTCAGTAGGCCCTGATTGCTGGG  
CGCTGCCTCCCCTGGGAT

>8074 len=199 tot-seq=1

GAAGACTCCAGTTGTGGGCAAGAGAGCCCACTGATCACCAAGGAGGGCATAACAGGTGTG  
ACATTGATGAGACCTTTCAGATCTTGGTTGCTAGGGGGACAAGAAGCTCTAGGTGTTACGT  
GTCACACACTTTGCTCAAATCACTCAAACAGTGACAGACAGAAGACTTCTCCAGATG  
CAGCACCTCAGCTCCCAC

>8075 len=199 tot-seq=1

GGGGCTTGGGGACCAATGCCTGTGGTGGGAGGTGTGGGTCTTGGGTTCTGGCTCGGGAA  
GCATTTGGGAGCTTTCCTGAGATTTAGAGAATGCCTCCTCCTTGTCTCCTTTCTTCTCC  
TCTGGTCATTTCTTTCCCAATCAGCCAAGCCCACCAGTTCCACCTTGCTTCTCCACAG  
GTCTTTGGCTGGTTGACTG

>8076 len=199 tot-seq=1

AGGTGTGGGGATCAGATCTCTGGATTCACCTTGTTCATGTTCTGCCTTTCACAGCCTCCT  
CGGGGGGGTCTCTAAGCATGGCTAGAGTTAATAACTTTATACTGGGAGTCTCGAACAA  
AGTGATTCTACCTATCGTTGGAAAGGGAGTGCATTCCAGCAGGGCAGGTGAAGAGCATG  
AAGTCTCAGGTACACGGAC

>8077 len=199 tot-seq=1

TTGGCAAATGTGCCTGAGGGGGTGGGGAGGTCATACCTTCAAGCACTGTGCTGACCCATG  
AGGGAGGAAGGAGGAACTCAGCTGTTATTATCTTTCTCCTGAACTTCTGATGTTTCT  
GGAAAAGGAGGCCCTGGGAGGGGCAGATCTCTCAGTTGCTAGGCTCCAAATAAATAACTG  
AATAATTAAGGACAAAGAC

>8078 len=199 tot-seq=1

GCCGCTCGATATCATACTCACCAGTGATTCAAACATGATGCTCTCCCCTAATGCCGGGCA  
CGATCATACTCAACTCATCGGAACAGTAAAGTACAAAATAGCAGCACTTTGCGCCGATCG  
GCTATTTTTTCATCATGCTGTTGAACCCTACTCCATACCCAATTCTTTTAGCTTACGCGTC  
AGGGTATTACGTCCCCATC

>8079 len=199 tot-seq=1

CAGACGTGTGCTCTTCAGATCTAATAAGGGAGGAAGAAGTAGGGAATATTACGCAATGGG  
AGAAAGCATGACGGAGCAACGCCGCGTGAGTGATGAAGGTCTTCGGATCGTAAACTCTG  
TTATTAGGGAAGAACAGATGTGTAAGTAACTGTGCACATCTTGACGGTACCTAATCAGAA  
AGCCACGGCTAACTACGTG

>8080 len=199 tot-seq=1

AGCAGCAGACTGATCGCCGCACCTGGATGTAGGCTACGGGGTGCAGCACAGCCCAGGCAG  
CAAGCCCAGACTCCTGGGTGCTGGCAGCGCTGAGCGGAGCCTCAGCCCTACAGGCACACA  
GCCCTGCAGGGCTCCTGTGCCATAGGGTGGCAGGCAGAAGCTACCGCGAAAAGGCCAAGG  
GCCTGACCTGTCCACTGGT

>8081 len=199 tot-seq=1

GTCCTGGGGAAACCCAGCGTTCTAACCTGCTTCATCTCATCACACCGGCTCATTTGGGGT  
CAGCACTGCTGTGTGTCCCCCTCCTGAGAGCAAGGAGTGAGGCTTCCCAGGCTGGTCT  
GTTCCCCGGGACAGTGCAGCCATCACAGCTGCAGCCCACATTCCCAGAGAATATTTTCAA  
AGCACGTTGCCTAGGGGAG

>8082 len=199 tot-seq=1

TGAGGAATATTGGTCAATGGTCGAGAGACTGAACCAGCCAAGTCGCGTGAAGGAAGACGG  
CTCTATGAGTTGTAAACTTCTTTTGTACAGGAGTAAAGTGAGACACGCGTGTTTTATTGC  
AAGTACTGTACGAATAAGCATCGGCTAACTCCGTGCCAGCAGCCGCGGTATCTCGAGATC  
GGAAGAGCGTCGTGTAGGG

>8083 len=199 tot-seq=1

TACTAACTGTACTCACTACGCCCTGGTCACTTTATAGCACAAGTCCGAGGCAAGGAAAGA  
AGTTTTACAAACAAAACCTGGTCAACTGTTCTATCTTCTTACTCCTGGAAAACAATAAAGG  
TCCACTTTCAAACCATTTGGACGCACTTGCTCCTTCTAAAGGGTTAGGGAGTCCCGGCAG  
ATAGCGTACCCCTCCCCGC

>8084 len=199 tot-seq=1

GTCTGTCTTAAAAGTTCGGGGCTTAACCCCGTGATGGGATGGAAACTGCCAACCTAGAGT  
ATCGGAGAGGAAAGTGGAATTCCTAGTGTAGCGGTGAAATGCGTAGATATTAGGAAGAAC  
ACCAGTGGCGAAGGCGACTTTCTGGACGAAAACCTGACGCTGAGGCGCGAAAGCCAGGGGA

GCGAACGGGATTAGATACC

>8085 len=199 tot-seq=1

ACGAGATTCATGTGTGACTGGAGTTCAGACGTGTGCTCTTCAGATATAATAAGGGAGGAA  
GAAGTGGGGAATATTGAAAAATGGGGGAAAAAATGATGAAGAGAAGAAGAGTGAGAGAAG  
AAGGATTTAGAGTAGTAAAGATATGTCCTATGAGAAGATAATGACGGTATCATAGGAGGA  
AGCCCTGGCTAAATACGTG

>8086 len=199 tot-seq=1

GCCACCTCCTGGGGCTGACACTGGCCGGGGCCTGCATTTCTGAGGGCGGGGCGTGCTTTG  
ACATCCTGAAAGGGTTGCAAACCCATCACAGAGAACCCCAAGAAGGGGAGACTCTGCCAC  
CGAGACCCCGTGTGCCCCGCAGGGTCTGCGCCGTGTGCTCTCTGGCTCTTCATGGAAGCC  
TTCCCAGCCCTGGTCGGG

>8087 len=200 tot-seq=1

CCCCACAGGCAGAATGCTACCCTTGGGAACCATGGAGACACATTACTATGAGCACACCCA  
GTAGATAACAACCACATACCGATTTCATTCTTATATAAAAAACAAACAAGAATAAGGGGA  
AGTGCCAAGCGTCCTTAACAGGGGGTGTGATAAACTGTGGGTACAAAACCGCAGGGACA  
GTGACTTGATGTGAGAAGT

>8088 len=200 tot-seq=1

GAGGCAAGGTCTGTAAAGGATTCACTCATCAAGGATGAGAACTGTAAACGATTCTGGTTG  
TCATCCTGACTGGAGTAGGGGGTGGGGTACTAGAGAGTTGGCAAAGCACACATACTCTT  
GTGTATCTGTGACTTGCTCCAGGGAACAGTGGTAGTGTGTCAGTGGACTGAGATCAGGA  
TAGCTCTTCTGAGTCACAAT

>8089 len=200 tot-seq=1

CCAGCTTCCTGAATTTCCATGTTTTGGTGTCTGCCTGACCTATTAACACACATACCCCTG  
AGGCAGACAGCACATGTTGATGCATATGTGTGCATCAGAGAGCACATGTCAGGTTGCAGA  
ATCTGACTGAGACAGCTTGGAGTCTTAACATTTCTGAACCTGGGGACAGCTATGAGCCGT  
GAGCTGTGGACGAGGGATGC

>8090 len=200 tot-seq=1

CATCTTGATAACAAGTTAGATGGCCAGGGAACACAGAGAGGGAAAAGCTGATTTGTTTTG  
GTGGGTGGAAGTCTTGCAGGCGTCCCGGAAGAGGTCATATTCCCTATCAACAAGATTCCT

GACATGTATATAAAATAGCCTCCCCGCAGCACCAGCACATATCTGAAACCCTTCAAACCT  
TGGCTATCATGACAAAGCTC

>8091 len=200 tot-seq=1

AGATCAAGGAAGAATGGTGATTCTTACTTTCTTTTGGCTCTATGGTAAGTATCTGGTTGT  
AAAGTCTGAGGGCATCCTAAGGGAAAATATTGTGTCCAGTGTAAGTGTGGTTTTGATCCT  
ATAGTTTTTTCTTTCTTTTTTTTTCTTCAGTGCCTCAGAATCTAGCTATCAAGTTGAAAT  
AGGTTAATCTGATCTTATCA

>8092 len=200 tot-seq=1

GGCCTAAAGTGTAGTAGGAGGGTACTCTGGGGGGCTAGAGGGTATGGGTGAGCGGTGGTC  
TGGCGACCAGGGGATGGTGGTGAGGAAAAGCAACCTGAAGGGATCCAGAGGGTTCGGCAG  
TCATATGCAGGGTGTGGGTGGCTGCCTTGTGGGAGAAGGTGGGTTTCCGTGAGCAAGGG  
AGCCTGACATACAGAAAAAG

>8093 len=200 tot-seq=1

AGCCCTTCTCAACTTGACTGTACATAAGACACACTTGAGAACCTTTAAAAACGACCTCTG  
ACCCTGTAACCACCTCAAATTAATTAGAATCTCGGGTCTCAAGCATCAGTAATTTGTGA  
AATCTCCCAAGTGATTCTAATGTGCTCCAGGGAGGCAAAGTCTGCTAGAGCCCAGCT  
CCTCAAAGTGCAGCCTGGGA

>8094 len=200 tot-seq=1

GTTGCTCTGGGGTTGCACCCATTCCCCAGTGCACCTTGTGGGGGCTGTGGGGTCCCCAG  
CAGGAGCATGCCCTGTGACTCCTGCAGGGCAATCAGAGTCATCCCCTACACTGCTCAGAC  
GTGGAGATGGGCAGGGCCTTGCTGAGGGTGGAGGAGCAGAATAGACAGAGACCTGGTGT  
AGCCTGGGACCTGCCCTCTG

>8095 len=200 tot-seq=1

TTTAGCTTGTGATGTGATCATAAAGTGAGTCACATCTGCCAGGCGCAGTGGCTCACGCCT  
GAAATCCCAGCACTTTGGGAGGCTGAGGTGGGTGGATCATGAGGTCAGGAGATCAAGACC  
ATCCTGGCTAACACGGTGAAAGCCCATCTCTACCAAACTACAAAAAATTAGCTGGGCAT  
GGTGGCAGACACCTGTAGTC

>8096 len=200 tot-seq=1

TAGGGAATTTTGCACAATGGACGCAAGCCTGATGAAGCAATGCCGCGTGAACGATGAAGG

TCTTATAGTTTGAAAGTTCTTTTATATGGGAAGAAACGCTAAGATAGGAAATGATTTTA  
GTTTGACTGTAGCATTTGGATAAGTATCGGCTAACTATGTGCCACAGCCGCGTAATTTG  
AAGATCGGAAGAGCGTCGTG

>8097 len=200 tot-seq=1

AGTCCTGCCCACCCTGGTGCCAGCCTGCCCTTTCAGCACCTCTCCCCACGCTAGCTCTG  
ATGCCACAGTGTTTTTGTACCTGCTGCTTCTCTGCCATAATGCTCTTCCCTTCCGTCT  
TGCCTGCCTGTCCTTCAGGACGCTGCTCAAATGTTTCTTCTGTAAAGTTTCCCTTGAC  
TCCCAAGGGCAGAACAAC

>8098 len=200 tot-seq=1

CCAAGGTAACACGGCCAGTAGATGAGAAGCCAGGATTTGAAGCTGTCTGGTCCCAGGGTT  
CAGGCCAGGCAGAGGGAGGACCCGGCAAGGGAAGATGCGCCCCTGCCCTGGAGTCTGGGA  
ATGACACGCTTCTTGCCTCTCAGGGAGAACCTCAATACTCAAGTCATTCCAGCAGCAA  
CACCTCTCCAGCAACGCAT

>8099 len=201 tot-seq=1

TCTATGGAAGATAGATGTGTTTAACTCACTCTGAAAAAATAATAGCCCTTGTGGAATGC  
CACTTCTCGGCGCAAGACATTCTCGTCTGGTATTTCTGTCTCTATTAGTGTGGCTACAA  
ACCCCTAGACTGAGCTGTCGCGGAGCTCCTACTGTGGCGAGTCCCCCTTGTACCACAGC  
AAGGCAAGGAGCTCAGCCCCT

>8100 len=201 tot-seq=1

CAGTGCCCTTACCATTGGTGTGAGGGGTGTCTGTAAGAGCTGGGAAGCAGAACAGACAA  
TGGGAGGGAGGAGCTGCTCTAAGAGCTATGACAAAGTAGAAGTCTGAAGTGGTCCATGGC  
CTGCAAGCAAGGGTTCCTGATGACGGGACCAGGCTCTCCCACTGCCTTTTACTTCTCC  
AGATTCCTGGATCACAAAACG

>8101 len=201 tot-seq=1

TGAGGAATATTGGTCAATGGGCGAGAGCCTGAACCAGCCAAGTAGCGTGCAGGAAGACGG  
CCCTATGGGTTGTAACTGCTTTTATGTGGGGATAAGGTGCGCGACGTGTCGTGCATTGC  
AGGTACCACATGAATAAGGACCAGCTAATCCGTGCCAGCAGCGCGTAATCCCCAGATC  
GGAAGAGCGTCGTGTTGAGGA

>8102 len=201 tot-seq=1

AACAGGAAATTAGATATAAAACCCACAACCTTTCTAAGGAGGGTAGGCCCTGTAAACAGGA  
GATTTTTTTGTGGGGCAGTGGGGTTAGATACAAAGTCATGAACCTCAATATAATTAATG  
GCCTGTCACAGTTCTGAGAGTTTTTCAGTAGTGGGTGGAGTGTACAAATTTGAAGGTAGAA  
GCTGGAAGACACTTAACTTC

>8103 len=201 tot-seq=1

GAGACTGAGACGGGGCCCCAGCTCCAGGTCAAGTCCCATGTGTGATCTGTCAGGCTCG  
ACCTTAGGGGATGACAAGGGGGTGCCTGGCAGGTCACACAGGGGCCAATGCCCTACTCAC  
AGCAGACCTCGTGCCCAAACCGTGCTTCCCAGTTCCTTGGAGGGGCCACGGTCCAGGACT  
CAGAAGGCAGAACCGAGGCCA

>8104 len=201 tot-seq=1

TGACTGAAGTGGCCGAGCACATGGGAAGTGTGGCTGGCAACGGATGCATGCTGTCCAGGG  
GCGTCGTATCACTTCTGCCATGGGGCTCCTCTCTGAGGGTGTCTCCAGCTCACCAGGCT  
CAGAGGGCAGAGAAGAACTCTCCAGGCAGAGCCAAGAGCATGCGCCAGGTTGGGCAGGGA  
ATGGAAGGCAGCCCAGGTACG

>8105 len=201 tot-seq=1

GACCCTTTCTGGAATGAGGGCCTTATGACCCTCAAACAGGCTAGAGTTCGGCTATGGGAA  
GGTGAAAGGAGAGCGGGAGTAGGTCAGAGAGAGAGATTCTGTTTACTCAAGAGAGTACGC  
AGAAGGGTGATGGGAGTTATGAGCCAGGAACCATGGGTGGAAACCTATTGTGTGTATATA  
TCTATGTCATCGATATCTATT

>8106 len=201 tot-seq=1

CGTATGGTGAGAAAACAGGAACAGAGCTGGGCAGCTCTGCTGGGTCATCTTGGGCCTTAG  
CAGGAGGTTGGAGGGACAGTGACGGCTTAGGCCACATCCCCTACAGGCACCCTTGGGCCT  
AGTAGGCAGAGGGGCTACGGCCATGTATTGGTAGCACAAGGCGATGGTCAGAAGGTCAAC  
CATGTGACCCTCATCTCTTTT

>8107 len=201 tot-seq=1

AGGTAGCCGGTGGGGAGCCTTCCGCCCCGGATGGCCGCGTGGGCCACCGGCAGAAAAAGG  
CAGCACAGAGCCATGGCGGGCAGAAACCACAGGTGGTAATGTCCCTTAACAAGGTCAGAA  
AAAAATTGATATGTATTGCCAAAATTCCCGGCGGCCAGCCGGGAGCCTAAGGCATAGACC  
AGCGACCAGAAGAAGAACAGG

>8108 len=201 tot-seq=1

TGGGGAATATTGCACAATGGGCGCAAGCCTGATGCAGCCATGTCGCGTGTATGAAGAAGG  
CCTTCGGGTTGTAAAGTACTTTTCAGCGAGGAGGAAGGCGTTAAGGTTAATAACCTTGGCG  
ATTGACGTTACTCGCAGAAGAAGCACCGGCTAACTCCGTGCCAGCAGCCGCCGGTAATCA  
AAAGATCGGAAGAGCGTCGTG

>8109 len=202 tot-seq=1

GTCCGGGTGACGCCAGGGAGCCAGGGGCGGCGAGGTCACGCGTGAAGACCACGCCAGCCC  
AGCCACGTGTGCGCCAGATTTAAAAGTTGGTGGCGCGGAGATGGTCACTTTGGTGTC  
TGAGCTCAGCAAGAGGAGGCGCACAGGACACGCTGAGGGACAGCTAAAACACCCGCACAA  
CACAGGGTACCAGGTCCCCAGT

>8110 len=202 tot-seq=1

TGAGGAATATTGGTCAATGGGCGAGAGCCTGAACCAGCCAAGTAGCGTGCAGGAAGACGG  
CCCTATGGGTTGTAACTGCTTTTATGTGGGGATAAAGTGCCTGACGTGTCATGCATTGC  
AGGTACCACATGAATAAGGACAGGGGTAGTAACTGACCTTTGTTGACGGTAATCAATTA  
GAAAGTCACGGCTAACTACGTG

>8111 len=202 tot-seq=1

CGAGGAATATTAGTCAATGGACGGAAGTCTGAACCAGCCAAGTAGCGTGCAGGATGACGG  
CTCTATGGGCTGTAACTGCTTTTGTATGGGGATAAAGTTAGGGACGTGTCCCTATTTGC  
AGGTACCATACGAATAAGGACCGGCTAATCCGTGCAAGCAGCCGCGGTAATAAAAAGAT  
CGGAAGAGCGTCGTGTAGGGAA

>8112 len=202 tot-seq=1

TGGGGAATCTCCGCAATGGACGCAAGTCTGAACCAGCCAAGTAGCGTGCAGGATGACGG  
CCCTATGGGTTGTAACTGCTTTTATATGGGGATAAAGTGGGGAACGTGTTCCCTTTTGC  
AGGTACCATATGAGTAAGGACCGGGGTAGTAACTGACCTTTGTTTACGGTAATCAATTA  
GAAAGTCACGGCTAACTACGTG

>8113 len=202 tot-seq=1

TGGGGAATATTGCACAATGGGCGCAAGCCTGATGCAGCAACGCCGCGTGAACGATGAAGG  
TCTTCGGATCGTAAAGTTCTGTTGCAGGGGAAGGTAATGACGGTACCCTGGGAGGAAGCC  
CCGGCTAACTACGTGCCAGCAGCCGCGGTATGGACAGATCGGAAGAGCGTCGTGTAGGAA



AGAGTGTCTTGTGGGAATATT

>8114 len=202 tot-seq=1

CTGGAGTTCAGACGGGGGCGCGGCCGAGAGCCGACGGGAGGCAGCAGGGAGGAAGAGGGG  
GCAAGGGGCGAGAGGCGGAACCAGCCAAGGAGCGGGCAGGAGGACGGCCCGAGGGGTTGT  
AAACTGCTTTTATATGGGAATAAAGTGAGGGACGTGTCCCTTATTGCATGTACCATACGA  
ATAAGGACCGGCTAATTCCGTG

>8115 len=202 tot-seq=1

AAAGCCCTGGGGTGTGCTGAGTTTTGTGTTGGCCGGGCCACTGAGATGATGCAACTCCAC  
TCTGCATTGTGCAATGAGATGAAAGGGCCACCAGGGAGGGCGCACACAGGGGCTTTCG  
ATCAGCCACACATTGAACTGGGTCACAATCAGTTATACACACAGACAGTCTAAGATTCAG  
AGGAAAAGGAAGACATAAACT

>8116 len=202 tot-seq=1

CATTCCTCTCGTTTTTCTTTTCTATTTATTGGGACATAATTGACATATAGTGAAATGCA  
CAGATCTCGAGTGATAGTTGGGTGAGTTTTGATAAATACAGACACTTGTATAAGCCATT  
CCCTTGGTATAGAACGTTTTCGTCACCCCAAAGGCTCCCCACCCCTTCCCAGCCAAT  
TCCCCACTTGCTCTCCTCCCTC

>8117 len=202 tot-seq=1

TTCTAACCTTGAGCCAAAGGATCAATTGATGGGCTTCAGAGGGACTGAGTCCCTTGAAT  
TCGGTGCAAAAAAATTTTTATTCCAGTGAAAGGCACATAGATTGAGAATGGCCGCAAGA  
GGCTCTAAGTCCCCTGAGGGTAGCACAATGTCTTACCCATTTGTGTCCCCAGAGCCTAAC  
ACAGGACTTGGCAGAAACAAGG

>8118 len=202 tot-seq=1

GATCCGGAAGGTAGTGTCCACATAGATATTTCTACTCCTTGGGACTCCTGAAGCCACTAT  
ATGCTGAGCACTGCTAGCCCCAAAATCCAGGGAAATGTTTTAGAGGTGAGAGGATCAATT  
GGGAGTGAGGGGAGTCAAATCCTAGAACCTTTTCTGCCTTGGAGAGCTGTCCAGGTATT  
CTATCTTCTCTGTCCCTCCTA

>8119 len=202 tot-seq=1

CAAAGACCCAGGCAAGAAAAATGCCAGGCCAGGGAAAAGCTCCGGGGGGATGGCGACAT  
GATGATAATCAGCTTCCAGAGGATGTTCTCCAGAAGGACCTGGAGATCGAGGAGCGCCA

CAAGGGGCACAAGGAGAGGATGAAGCAGATGGAGAAGCTGAGGCACCAGTCCAGAGACCC  
CAACCTCAAGGAGAGGGCGAAG

>8120 len=202 tot-seq=1

AGGTGCCACACACGTGTCAACTGAAAATCCAGCAGAGACCCATGCCAGATGTCAGGGAAG  
CCCAAGGAGCGATGGAGGGAGAGGAGGAGGACTTCCAGGGGTGGCGAATTGTGCTTTTCT  
TGAAGGATGAACAGTTCATCAAGGGGTGGGGAAAGGCATCCTGGCAAAGTCCCAGGTGCC  
CCCCAAAAGTCTCCGTTACTGC

>8121 len=202 tot-seq=1

GAGGGGTGAAGCTGCTAGCTCAAGGTCACCAGCCCCTTGGGGGCAGAGCTGGAACCTGAA  
CCCAGGTTTTCTGATACCAACTATAGCGTGCTGTGCCTCTTCCTCATTCAACAACACAGGC  
ACACAGAATGTAAGGGGCACCAGGCTGGCCTCTTCACCCTGGGCCATTAAACTAGGCTGT  
CCTCACTCCCATCCCCATGAGG

>8122 len=202 tot-seq=1

CCCCCGCCTCGGCCTCCAGAGTGCTAGGATTACAGGCGTGAGCCACAGTGCCCGGCCG  
ATACATGGCTCTTAATATGTAACAGGCATTGTTATCGAGCATTTGACGGTGCTCATTTC  
GACAAAGAAAACGAGGCTCAGAGAAATTAATAACTTTCTTAAATCACAGAGCCACTAAG  
TAATGAAGTGTGAATTCAAACC

>8123 len=203 tot-seq=1

GCGAGGGCTGCAGTGAGCACAGGGCAGCACCTTGGAGGTGCGGTGCGGGTTTCCAGGGCA  
TCCGTGGAGGGCAGCAGCAGGCACATGCAAGGAGCAAGCGTGCTGTGTGTATCCATGA  
TTCATATGCTCACCCCCAGGATCTGACAGGTCTTCAGACCGACCAGGTCTCTAATCTCCT  
CACAGCCTTGCCAGGCAGGCGGA

>8124 len=203 tot-seq=1

GGCAAATCTCCACCAAATTGGATTCACCTGTATCCTGGTGCACCTGCGCAGCTCTCAAG  
ATGTTTGTGGCTTATATGAGGAAGTCAGGTGCAAGTCATATGACTTAACTGCAGTCCCTG  
GCGCCTTTGGGACTGCCGCCACACCTGCTCCTAACATCTCCCCCTTTTTCTTTTCTGGCA  
AAGAGAATGTCTGTAGATAGCCC

>8125 len=203 tot-seq=1

GAGAAAAGGAAGTAAAGTTTACCTATGGGTTACGCAGCCGTGCCGGACCCGGCAGGGGCA

CTTGCCAAGGGCCTGGCATTCTATAGACTGGTCTTAAATCATGTGATTTTGCCTAAG  
CTTGGGTAGGATAAAAATCACACAGGAGAGCACAGACGCAGTGTGAGGTAACCTGCCAGA  
AGCCACTTAGCTCAGGAGAGACC

>8126 len=203 tot-seq=1

ACGCACATGCCTATGGCAACAACATGGTGGAGTGAGGCTGTTGGTGAGTTTACATTGGTA  
AAGACCTGTCTGCTAAAGCTCTCCAATGGTTAGAGAGTTCTGCCAGTGAACGAGCTATGG  
TGGTGGTCCCAAGATGTGCCATGATTGAGCATCCAAGTCTGTGTTGCAAGTGGATACAG  
AGAAGCAGGAACCTTAGGAGAGA

>8127 len=203 tot-seq=1

AAAGTTCCAGCCAGAAAGGTACAACTTTGGAAAGCTGGGAAGGACAACACAGTTATTGA  
CCATACTCTGCCACGCCAGAAGCAGCTGAGTTTCTTAAGGAGAGTGAAGTGCCTCCAAG  
AGCTGGCAACGAGGAGGAGTGCCAGAGGAGGACATGGAAGGGTGGAGGATGGAGAGGA  
AGGAGACCTGAAGACAAGGTAAC

>8128 len=203 tot-seq=1

CTACCCTTCTCTCTGGGACTTCATCCCAGGGAGAAATCAGAGTTCTGTCCATAGAACTC  
CAGCTGGAGTTTCTAAAATTCTGATGGGGAGGCCCTGTCCAGTGAGGATGGATGGATTTT  
GGTCTCACTTAAAGAAGCAGCCTGGCCACGATCAGTCACAACAGCTGTACTGTGTTATAG  
GGGACTCCTCCTGGTCCCTGGTG

>8129 len=203 tot-seq=1

TTTTTGCAATATCCAGATGAACACACTGAGGCACAGAGATGCAAAGTACTTGTCTAGGA  
CCACACAGCTTGTGAGTGACAAAGCTGAGATTTTAACCCAGGCCTGTTAAAGCTTCATAT  
AAGTTGTGGGCATTTTGGTGCAGGAGGCAGAATGCATTAATGTGCCTGTCATCTTCCTTC  
CCTAGGGCTGAAAGTCCTCAGCC

>8130 len=203 tot-seq=1

CTCAAAGTCTCTTAACGGATGGGAAAGTATGCTCCGACGACAGGGTAGAGACTCCTCAG  
CGTCAACCCGCTTTTCGGCGGCAGGACAGAAAGTGGCCTGGGCCTGGGCCTGAGATGGTT  
CCTTCTACACCCTTCTCCAGGGTACCGTGTCCACCTTAAGCCTCTGGACCCTCTGACA  
TGTAACCTGTGTCCCTCCCAA

>8131 len=203 tot-seq=1

CCAGCAGGTAAGGCTGGCCATGGATGTAGAAAGGAGAGCACTTTTCAGAGAGGGTTTCTG  
AGATGGACTTGGGACCACTGGGATGGAAAGGGCTTCAGAGGTTCAATTAAGTGCCCAAGGA  
AAGCAAGGCTCCCTTAACACATTCTGCAGGGACAAAATCAGCCTGGGGTCCCTGCAGGT  
TAAGCATCAATTTACCATATGAG

>8132 len=203 tot-seq=1

AGAAGGGTATGATTTCAATGGTAAAGGCAAAGGGGAAGTGTGTTCTGGGCTGAAGGAGCA  
GTGTAAGCAAAGATACAGAAGTGTGAAAAGTGGGGCAGGTGCATAGAATGAGCAGCCCA  
ACATTCCTGGAGTTAAATGTGGTATAAAAGAGAGAGGGGGCTCCAGAGAAGGCTTTCAATG  
CTGGGGCAGGAATCCACCTCCCT

>8133 len=203 tot-seq=1

CTTTAATCATCAGGGGTGCACAGGGCGGTAGGCACTAGACAAGTGCATACACCCCAACC  
CCCAGGATGTTTAACTGAACCAAAGAATCCTCGGGGAGCCTAGGAGACCCTCTGAAA  
GCTTGTACCCTCAGCCACGCGACTCCCGCAAGGACCAAGGTGAAGTCCGAAGCTGAAGC  
CAAACCAGCCCCAAAGGCTAAAC

>8134 len=203 tot-seq=1

AAAGTGTAATAGGAATAGAAAAGGCTTGAAGGACGGGAGAAGGGGGAGGTATTCTGGT  
TTATGAGTACATAAATAAGTACTTGAAGCCTAGAAGTGCCTGGAATAGCTGATGTGAGT  
TGAAGCATTGAGGGCATTAAAGAATAATAATTTGAGCCAGAGTCAAAGTCCGAAGCTGAAGC  
TTCAGGCCTGATATTGTTTCATG

>8135 len=203 tot-seq=1

CACCTTCCCTGGCACCAGGTCCCATCCTTCTCTGCAAATAGCTCTTTCTGTAGGATGTT  
ACCTTTCCTGCAACAGTGGACCTCAGCCTCAGCTATGCAGCTTTGAAAAGTGCTTATGCT  
TGGGAACCAACCCAGAATTTTGATTTAATTGATCTAGGACGAGGCCAGATAGGGCAAG  
CTTAAATGGCTCTCCTGCTGATT

>8136 len=203 tot-seq=1

GCGTCTGCTGTGAAAGGCCGGGGCTTAACCCCGTGTATTGCAGTGGGTACGGGCAGACTA  
GAGTGCAGTAGGGGAGACTGGAATTCCTGGTGTAGCGGTGGAATGCGCAGATATCAGGAG  
GAACACCGATGGCGAAGGCAGGTCTCTGGGCTGTAAGTACGCTGAGAAGCGAAAGCATG  
GGGAGCGAACAGGATTAGAAACC

>8137 len=203 tot-seq=1

CAATCTCTGTTTTGAAACACAGGGAGCCCCGCTGTGCGGAGATCCAGGCACCTTTAATTC  
AGCAAGAGGGGCTGAAAAACCTCCACATTTTGAAGAAGGATCCAAACCCCTGTTTTAG  
GTAAAGAGAGCCCCAACGTTTTGGGGGATGGTCTGAAGGCCGCCATTTGTAGGGACACA  
GAGCCCTGGTGTGCAGGTCTGGG

>8138 len=203 tot-seq=1

TGCAAGTAACTACAGGCAAAGATTCAATGTGAGGAGTGGCTGGGGCAGTAAGATAGGTCC  
AGAGGAAATGCTCTGAATTTAGACTTCCGGGCTCATCCTGCAGGCTTGCTGGAGTGAGTC  
CCTGTGTTTCTATTTGCCCTCTGAGTTTTAGGGCTGAAATTGTAGGAGGGTGTGTACCC  
ATCTTGTAGGCCATTCTGTCTAC

>8139 len=203 tot-seq=1

TTTATGAAACACAAAATGTAAAAATAATTGTATAGGTAAATATTTTATAAGTAAGTCTAT  
TTTATACATTTACGTTTATGTTTAGATTGGTATTTATTATTATTACATTTACCTATAAA  
ATAAAACATGGTTTAGATGTAAATTTTGTAGGTAAATTTTAGGTAAATATAAGAGCCTA  
CATGATGGTCCAGACTCCACCAT

>8140 len=204 tot-seq=1

CAAGCCTAGCCGAACAACCATGACAAAAATATAAAACAACCAAACAAACAGAAAAACAGG  
AAAACCCAGGTTTCAGCTACAGACTCTGTCTCACGCATGTGTATAGCCTTATTTCTTATA  
CACATGCATATACACGTATATGTAACACACACAATTCATATTTTAACTATAACCTAAAT  
AGTAAATACTTCAGCACAGTCATG

>8141 len=204 tot-seq=1

GGGAGGAGGGATGGGAGAGGGGAACCTAATCTGCTATTAGATAAGGGAAAAGGACTGAAG  
CCCTAAGGGCCAGCAGAAAGAATGTAACAGGCAACCTCGGGAGGTAGGAGGCTGGGAGCC  
ACCCTCCAGAATTCATCAGAGATTTGGAAGGTGAGAGACTCTCAGGACCCAAAGGGAGGG  
ACCTTAAATGAAATGCCTGACAGT

>8142 len=204 tot-seq=1

GGGCAAATCTCCACCAAATTGGATTCACCTGTATCCTGGTACACCTGCGCAGCTCTCAAG  
ATGTTTGTGTCTTATATGAGGAAGTCAGGTGCAAGTCATATGACTTAGCTGCAGTACCTG  
GCACCTTTGGGACTGCCGCCACACCTGCTCCTCACATCTCCCCCTTTTTTCTTTCTTGGC

AGAGAGAATGTCTGTAGATAGCCC

>8143 len=204 tot-seq=1

ATATGGTACCGTGTCTTCTGGAAGAAAAAAGAGGAAGGGACTTTGTAACATTATCTGGCT  
CAGAGAAGAATGGCTTCTATAGAGCAACAGCAAAAGCCACAGAGCTGGAGCAGATGCTGC  
TTCCTGGGTGCTCACTCTCTGTTTGCCAGAAAAGGCAACCGTAAAGGCAACCGTAAAG  
GCAACCATAAAGGGTCTTCCCTCC

>8144 len=204 tot-seq=1

TGAGGCAGAGGCATCGAAGGTTGGGTCTATGCCTCTGTAGGGCATGATTTTCTACTAGCA  
GCCAGAAGTCTCTGCCAATGTTGCTAGCTGTTGGAGTGGTGGAGGACAGAAGAGGGGGG  
AAGGAAGCACTGGAAGTAGAGTGTTCATATCCTAGGAATATGTTTGTAGCACACAGCAC  
TGCTAGCCTTTACTTTTTAAGTCC

>8145 len=204 tot-seq=1

GAGCTAGGGCCCACTACAGATTAAGAAGGAAGCAGGACTCACAGTCTCTCCAGCTTTG  
GCAGGTGCTGGAAGGATTCAGGGTCCAGCGTTTCTATCTGATTAAGTGCAGGTACCTAG  
GGGATAAACAGCCACACAATGTGAATGACTTACCGACCTTTGCCAACCCAGATTTTGGG  
CTCCAAAGTTTTCCCGCACTTCGT

>8146 len=204 tot-seq=1

GCTCAGGAGGACTGAAGGGCCACATCAAGTCTGCTCAGAGATCACATGGGGTGCGGATG  
GAAAGAGACTTAATATCAGCTACACTGGAGACATTAGCCAAGTGTGGGCTCAGTTCAGAA  
ACTTGGGAGACCCAGTTAGAAGGAGCTGAAAAGCTCAAGAGAATTTCCGAGAGAGACAGG  
AAATGCAATTAGTTAAGAAGTTTA

>8147 len=204 tot-seq=1

TCTGGTGGGCAGAGGAAGGGAGATCACAGGTCCATGGAAAGAGCCAGTCGTTATCTATGT  
AAAACAACCAAGTCCATGTATACAGCCTCTCCATGGAACCTTCCGTCCAGCTCCCTGCC  
TCATTCACATACTCATACTCATCTCTTTTCTAGATGCACCCACACCATCCACACCCACA  
TTATCCCCAAGTGCATCATCCTCA

>8148 len=204 tot-seq=1

TGGGGAATATTGCGCAATGGGGGAAACCCTGACGCGGCGACGCCGCGTGCGGGATGAAGG  
CCTTCGGGTTGTAAACTCTGTTGTAAGAGAAGAACAATTGTAGAGTAACTGCTACAGT

CTTGACGGTATCTTACCAGAAAGCCACGGCTAATTACGTGCCAGCAGCCGGGGTATTA  
AGATCGGAAGAGCGTCGTGTTGGG

>8149 len=204 tot-seq=1

AAGCGTCCCAGGAGGAAGCGCCCAGCCATAAATGGAGAGAGGAGATTCGGTAAGACCAAG  
TAATGGTCCTTCAGTGGGAGAGGCAGTCAGCTGGAATTCACAGGCCAGCTTCCAGATCGA  
TACTTCTGTGCTGATTTGCTGAAGAGGCTTTTATGAAGTTAAGCAGAGTTCATTGTTAA  
ATACTCTTATGTACAAAGGAGCTG

>8150 len=204 tot-seq=1

CCCCAGAGGAAACGGAAGTCGTATCTGTCCGGACGGAAGCAGGAAGCGGGAGCGTAGGGC  
CACGCCTGCGGCGCTGCTGGTTGAGGCTGTGTGGGTGGGGGACGGGCCGAGGCGATGGCG  
GAGAAGTTTGACCACCTAGAGGAGCACCTGGAGAAGTTCGTGGAGAACATTCCGGCAGCTC  
GGCATCATCGTCAGTGACTTCCAG

>8151 len=204 tot-seq=1

TTAGTAAAGGTACAGTGTGGCCAGATGCGGGGTGTTTGACCCTCAAAGTGGCGCGTGTGA  
CTATCTCGCGGTTCCGGGGAGGTATAGGAAGCGCGCACACCCCTCGAAGCCACGGAACA  
AGACACGGCTCAACTGCACACCTTGAAGATCGGCGGCAGCAGAGCGGAGCCCGACAG  
GACTGGGCCATGCGGACCCAGCAG

>8152 len=204 tot-seq=1

GAGTGGGGGCCACTTTTGAGGAGGGAGTTGTTCCAAGACTATGCTGATGCCTGAACA  
TGGAGGGAGGAAGGGCAGGCATTGGGACTGATTGTCATGAGAGGGGTTGCTCTGGGCCGG  
CAGCCAACCAGAACATGAGGCCACTGACCTCAAGAACAAGAAGACTGTGCTGGAAGGAGC  
AAAGGTGCCAGAGAGAAGCCACA

>8153 len=204 tot-seq=1

TGAGGAATATTGGTCAATGGACGAGAGTCTGAACCAGCCAAGTAGCGTGAAGGATGACTG  
CCCTATGGGTTGTAACTTCTTTTATATGGGAATAAAGTATTCCACGTGTGGGATTTGT  
ATGTACCATATGAATAAGGATCGGCTAACTCCGTGCCAGAGCCGCGGTGATAGAAAGATC  
GGAAGAGCGTCGTGTAGGAAAGAG

>8154 len=205 tot-seq=1

TGGGGAATTTTGGACAATGGGGGAAACCCTGATCCAGCCATCCCGCGTGTATGATGAAGG

CCTTCGGGTTGTAAAGTACTTTTGGCAGAGAAGAAAAGGTACCTCCTAATACGAGGTACT  
GCTGACGGTATCTGCAGAATAAGCACCGGCTAACTACGTGCCAGCAGCGGTAATACCGAG  
ATCGGAAGAGCGTCGTGTTGGGGAA

>8155 len=205 tot-seq=1

TGGGGAATATTGCACAATGGGCGCAAGCCTGATGCAGCCATGCCGCGTGTATGAAGAAGG  
CCTTCGGGTTGCAAAGTACTTTTACGCGGGGAGGAAGGCGATAAGGTTAATAACCTTGTCG  
ATTGACGTTACCCGCAGAAGAAGCACCGGCTAACTCCGTGCCAGCAGCCGGGTAATTCCGG  
AGATCGGAAGAGCGTCGTGTTGGGGA

>8156 len=205 tot-seq=1

GCCTGAGGGACCCACAGAGATGCGAGGGTCCACCGGCTGGAGGGAGGGGAGGCGACAGG  
TCGAAGATGAGGTGAGGCAGCGAGCCAGGCTGCAGTTCCAGGAAGGACCCCTGCAGCA  
CCTGCAACCAGGCAAGCTGGGATCCACCCACTGTCACTAGGAGGGAAAAGAGGAACCAGA  
AAGTTCTCATACAATGGAAACTTC

>8157 len=205 tot-seq=1

GGCATAAGATCAAGTGGTACTGGAGTTCAGACGTGTGTTCTTCCGATCTCCTACGGG  
AGGTAGCAGGGGGGAATATTGCACAAGGGGGGAAACCCGGATGCAGCGACGCCGCGTGGG  
CGACGAAGCGCTCAGGCGCGGAAAGCCCTGTCAGCAGGGAAGAAAAAGACAGTACCTGA  
CCAAGAAGCCCCGGCTAACTACGTG

>8158 len=205 tot-seq=1

CTCTAGAAGCTGGACAAGAAAGGGAACAGATTCTTTCTATAAGGGTCATCAGCAAGGGAA  
CCTAATCTCCCCAAGAGCCTCCAGAAGACACACAGCCTTGCCAATCTTGATTTTGGCCC  
CATAAACCATTTTCAGATTTCTAACCTCCAGAACTATGAGAGAATACATTTGCATTGTTAA  
GCCACTGAGTTTGTGGTAATTTGTT

>8159 len=205 tot-seq=1

TGAGGAATATTGGTCAATGGGCGTGAGCCTGAACCAGCCAAGTAGCGTGCAGGAAGACGG  
CCCTATGGGTTGCAAAGTCTTTTGTGCGGGGATAAAGGAGTCCACGTGTGGATTTTGC  
AGGTACCGCATGAATAAGGACCGGCTAATCCGTGCCAGCAGCCGCGTAATGTCTAGATC  
GGAAGAGCGTCGTGTAGGGAAAGAG

>8160 len=205 tot-seq=1



TGAGGAATATTGGTCAATGGGCGAGAGCCTGAACCAGCCAAGTAGCGTGCAGGACGACGG  
CCCTATGGGTTGTAAACTGCTTTTATATGGGGATAAAGTGGGGAACGTGTTCCCTTTTGC  
AGGTACCATATGAATAAGGACCGGCTAATTCGTGCCAGCAGCGCGGTAATCACTAGATC  
GGAAGAGCGTCGTGTAGGGAACGAG

>8161 len=205 tot-seq=1

CAGTGACTGGAGTTCAGACGTGTGCTCTCCGACTCCTCGGGACAGCAGTGAGGAATATT  
GGTCAATGGGCGAGAGCCTGAACCAGCCAAGTCGCGTGAAGGAAGACTGCCCCGAAGGGT  
TGTAAACTGCTTTTGTATGGGATTAAGTCACCTACGTGTAGGTGTTTGCAGTTACCATA  
CGAATAAGCATCGGCTAACTCCGTG

>8162 len=205 tot-seq=1

GAGGGAGGATCTAGACACAAGTGTCTCTTAGGCCAAAAACAAATTTGTTCTCAATGAAA  
GTGGAAGGATGGAAGCAAGGAAGTAGGCTATGGAACAGAAATGAGCAAACCTTTTTTTTTT  
TTAACAGCAATGTTTCATCGATTATAAGGGCACCTTTTATGCAGTGGTTAAGAATGCTGGG  
GAGTCACACTGCCTGGGATTACAGT

>8163 len=206 tot-seq=1

TAGGGAATTTTCGTCAATGGGCGCAAGCCTGAACGAGCGATGCCGCGTGAGTGAAGAAGG  
CCTTCGGGTCGTAAAGCTCTGTTGCGGGGGAAAAAAGGCAGCATCAGGAAATGGGTGCTG  
ACTGATGGTGCCCCGCCAGAAAGTCACGGCTAACTACGTGCCAGCAGCCGCCGGTAATGC  
CAAGATCGGAAGAGCGTCGTGTATAG

>8164 len=206 tot-seq=1

AATGGGAAAAGTAAGATGTGGAAGTAAGCAGAACTTATTGAGGAAACGTTGTGATGGCCC  
CTCTGGTGCGTTCATGTGGACATCTATTCTGTTTCATCCTACCCATACCCAGGAAGGG  
GAAGACATCAGTTGGAGATGGCCACCAAATCTCTGTGCCAGCGACATGGAGAGAGTGTCT  
GGGAGGAGAGTCAGGATTCAAAAGAC

>8165 len=206 tot-seq=1

TGGGGGATGGGCTGAGTATGACCAAAGTACATCCATGTGTGACAATGCCATGAAGGGACC  
CAACACTTAATAAATTAATGTATGCTAATAAAAAGTTAAAGTGAAGTAAACAGTAACTTA  
GGTTGCAGGTTATAAAGAGTCGAGGGAACAACAGTAAAATCCGGAGTATTCCGAGACAGA  
CATAGAGCCTAAAAGGACCTAACAAG

>8166 len=206 tot-seq=1

TATATACAACACTGATCATTTTTTTAAAATCCTGGCAATATCCCAAGCTCTGGTACCTCT  
AGATTGGACTACCTACTTAGAAGATTATTTACCCAAGTTTTGTTTTAATCTAAAAAGGA  
ATGGGCCTTTTATTTATAAATATATATGTTGGCTTTAGTTTCTGTAACCTGCCCTTTCAA  
AGAAAATAATGAGCGGAGAGGTATTG

>8167 len=206 tot-seq=1

GGTGGATGTAATAACCTGCAAAGCCTACAAGTTGATGAGAAGAAAGGCGGAAGAGAAAC  
GAAGATAATTCTTACGATCACCTTTTATATATAGATATATGCTGAATCCAATGGGCACAG  
GCACCCAACAAAGATAGAAAAAGCCTGCCAAGAGGTCGGCGACAGTGTGATGGTGAAGTG  
CAAAAACTCGTTGGGTGTCACGGTG

>8168 len=206 tot-seq=1

GCAACAAGAGCAATTGGATGATGCTTTGTGGTTAATGAAGGACAGGACTTTCACCTACA  
TTAACTCTTTGGATCACCTGCTCCACCTACCATAAGAGGCTGATTCTCACAACAGCCTC  
TTATGGTAGGTGGAGCAGGTGATACAATCTTTATTTTACATAAAGATTACAGGGCTCAGA  
GAACTGAGGGACCTACCCAAGTTGC

>8169 len=206 tot-seq=1

CAACTACAGCGGAAAGAGAGGCAAATGCATTGAGAGGCAGCTCCAGCCATAAGGTGTCA  
CTGCTGTTTGAAAGTTGATTCAATCAATATTAATAACATGATGCCATCACCGAAGATTTA  
CTGATACATTGAACACTTACTGTGGGCCAAAGCTGTAGCCAAGTGCTTTATAAGCGTTAT  
CTAATTTTATCCCCAGCAGCCGCGGT

>8170 len=206 tot-seq=1

AAACAAACAAACAAACAAACAAACGAACAAACAAAAATCCAGTTAAGTATATGTTTCAGGC  
TAGGCAGTAGCTATTTTGAAAACCTCAGGACTAAAGGAATTCCTGGGAGTATGTATAGGAT  
GATTAGAGTTGCAGTTTCCATTGTCATGCAGTAGAACATCTTGCGGGGGTAGGTACACAA  
TGGTGAGCCATCAGCAGGCAACATTG

>8171 len=206 tot-seq=1

ATCATGGGGCTTCTCAGCCTCCATATTGCATGAGCCAATTCCTTATTTTATATATGTTTT  
GATGATTCTGTTTCTCTGGAGAGCCCTGACTACACAGGGGTAGAAAATAATGGAGGAAAC  
CCACTGAATAGCATGTTCAAAGAAGGCCTCTCTGGGTTGGTGCAAAGCATTAAAGTGAATA

AGGTAGATTAAAGAGTGAAAGAGGCC

>8172 len=206 tot-seq=1

GGAGCAAAGCAGGAGAGCCTGGGCGAGCGCACGAAGGGTGAGGCTCCCATCCCGGGGTCT  
CCTCCGCCTCTGTGCCTGGTCACGGTATGAGGTATTACCCACAGAAAACGGGGGCCAGAA  
CCTGACCTCTAGCCTGCCCCACCCTGGGCACAGCTTCTCACCACAGGAAAACCTCCACCAC  
GCGCTCAGCTTCCACCCCAGCACAGG

>8173 len=207 tot-seq=1

TGGGGAATATTGGACAATGGGGGGAACCCTGATCCAGCCACGCCGCGTGTGTGAAGAAGG  
CCTTATGGTTGTAAAGCACTTTAAGCGAGGAGGAGGCTACTGAGACTAATACTCTTGAT  
AGTGGACGTTACTCGCAGAATAAGCACCGGCTAACTCTGTGCCAGCAGCCGCGGAATACT  
CAGATCGGAAGAGCGTCGTGTAGGGAA

>8174 len=207 tot-seq=1

TGTTGTTGTTGTTGCTAAGCAAACAGACAATTTTACGGAGAGAATGAATAAGATCCATTT  
CTTCAGAGCCACTTGTAGGATAAGGCAATGGGGGTACAATCCCTAACCTATGCCAAAGG  
TGGAGGTGGAGAAAGGGTCTAGTTCCTGGAGGAACTAGAATGGTACAGTGACTCAGGAG  
GCAGTGGGGGAGGAAATGACGAACTTG

>8175 len=207 tot-seq=1

AAGAGATAAAAATGTGAATGGAGGTAAGAAGTGGGAGAGGAAGATATAATAAGGGAGGAA  
GAAGGGGGGAAGAGGGAGAAATGGGGGAAAAAATGAAGAAGAGAAGAAGAGTGAGGGATG  
AAGGAATTCGGGTTGTAAACCGCTTTTGATTGGGAGCAAGCCTTTTGGGTGAGTGTACCT  
TTCGAATAAGCGCCGGCTAACTACGTG

>8176 len=207 tot-seq=1

CTGGAGTTCAGACGTGTGCTCTCCGATCTCCTACGGGAGGCAGCTGTATGTCTTCTTCC  
ACAATGGACGCAAGTCTGATGGAGCAACGCCGCGTGAGTGAAGAAGGTCTTCGGATCGTA  
AAACTCTGTTGTTAGAGAAGACCACGAGTGAGAGTAACTGTTTCATTTCGATGACGGTATCT  
AACCAGCAAGTCACGGCTAACTACGTG

>8177 len=207 tot-seq=1

CAGGTGATAATCAAATAAGGCTGAGAACCAGGCAGTATGGTGGTTGGAAAAGAGGCAGAG  
AGGGTCAGATGATTCTCAGGGGGTCTGGGCATGTTTGAGAATGGAGAAAAAATAAATTA

AAATATTGATGACCACCAAATGAGACCAGTAGGAAATGGCTGGAAACATTTCAAGAACT  
GGAAATGAAAGGTCACCCAATCAAAGC

>8178 len=207 tot-seq=1

GTGACTGGAGTTCGGACGTGTGCTCTTCCGATCTCCTACGGGAGGCAGCATTGAGGAATA  
TTGGTCAATGGGCGAGAGCCTGAACCAGCCAAGTCGCGTGAAGGAAGACTGCCCCGAAGG  
GTTGTAAACTGCTTTTATGCGGGGATAAAGGAGTCCACGTGTGGATTTTGCAGGTACCG  
CATGAATAAGGACCGGCTAATTCCGTG

>8179 len=207 tot-seq=1

GATGCGATAGTACTGGAGTTCAGACGTGTGCTCTTCCGATCAGGCAGCAGTGAGGAATA  
TTGGTCAATGGGCGAGAGCCTGAACCAGCCAAGTCGCGTGAAGGAAGACTGCCCCGAAGG  
GTTGTAAACTTCTTTTGTATGGGATTAAGTACCTACGTGTAGGTGTTTGCAGTTACCA  
TACGAATAAGCATCGGCTAACTCCGTG

>8180 len=207 tot-seq=1

AAGAGATGGACATTTTCCATCTCTTCTCATTACACACACTTCTTTTCATACAAACACAC  
TTCTTTTCACACACACACACACACACACACACACACCTCTTCTCATTCTATACTGCCC  
AATGCACCAAATGGACGGCAGTGGCCCCACTAATGAGAGCCACAGAACACTAAGCCCCAA  
GTGCTCCACAAGTTCTGAGTAATGCCT

>8181 len=208 tot-seq=1

TAAGAGGACAAAGGCATTACAGCTTATACGATGAGAATGTCCCCAACGGGATCTGATGTT  
TGAACATATTGCTCTAGTTAGGGTAGAATTATCACCTATATCCTTGCTGGAGAAAGTGTC  
CCTTGGGGTGGGATTTGAGGTCTCAAACACTCATGCCATCCCCAGTTTTTTCTGTCAGTT  
TCCCACGTGAAGCACAAGATACGAGGTC

>8182 len=208 tot-seq=1

GCTGTATAGACTTTGATGGTACTGGAGACATCTACCCAAAGGGACCCATGGACTCTGGA  
AGCCAGCCAGGCCTTATCTGTACCTTGAGAATGCAGCCTGTAGGTTCTGGGCAGGCC  
CTGTTTATCCGGAAGCAGAGGGAAAAAATCTCACCCAAGTGGTTTGCCTGGCCCCTGGT  
CCTGGGCTGTGCCTGGACGGGCATGCAC

>8183 len=208 tot-seq=1

GGAAAGATGTCATCTCACCATTGCCTACACAACCGTGTGTGCGTGTGTGTGTGTGTGTGT

GTGTGTGTGTGTGATGTGTGCACACACATCCACAGGCATTACACCTGGGATGCTCTATG  
CTCTATGCAGGCCTACTACCTGCCCACAGTCTGGGTGTGCAGGACTCAATCTGCCATCT  
TTGTTCTGGTTTGGATGGAGTTCTACCC

>8184 len=208 tot-seq=1

GATCGCCAGCGTATCTTTTTGCTCATTCCCAGGGCGCTACAGGACTGCCACTGACCTTC  
TGGGATCGCACGAATTGCACCGTAAAACAGCTGCGTGGTATACGCCGCACTGTTCAAGCGA  
TAACGCAATCAGCGCACATAACCACGGTTCTGACAACAAATGCCACAGTGCCGGATACTC  
CTGCAAAGTCGGAAACTGGCCCGGCCG

>8185 len=208 tot-seq=1

TGGGGAATATTGGACAATGGGGGGAACCCTGATCCAGCCATGCCGCGTGTGTGAAGAAGG  
CCTTATGGTTGTAAAGCACTTTAAGCGAGGAGGAGGCTACTGAGACTAATACTCTTGGAT  
AGTGGACGTTACTCGCAGAATAAGCACCGGCTAACTCTGTGCCAGCACCGCGTAATCAC  
GAGATCGGAAGAGCGTCGTGTATGGGGA

>8186 len=208 tot-seq=1

AGAGGGCAGAATGATGGGAAGCTGAGCTATGGGGCAGTCACAACAGTAGCCTTAGCCAC  
CCATAGAGCTTGAAGTGGGTGGCCCTGCAGAGGCAGGGATCAGGTCTTTTAACCCAACAC  
TGAAGTGTGGCTGCCCTTGGCCAAGTGGCTGTCTTCAGCTCATGGCCACCCCTGAGGAA  
CTGGGCAGAGTTCTTAGCTGCCAGCACC

>8187 len=208 tot-seq=1

ATTTCTGACAGCAAAAATAGCCTGCTTCAGCTTTCAGTGGGGATTGATTAACCAAGCAA  
ACGAGAAAAACCCCAAACAACATCTCATAGCAAAGATGGATGTGAGCCTGCAGGGGAAG  
AGGCTGCTTTTCTAGGGACAATGAAAGGTGCTGTGGACTCAGAAGGGACACAGCACCAGA  
CACTGCGCCTTGCCTTGAAGAACAGGAG

>8188 len=208 tot-seq=1

ACTGTGACTGGAGTTCAGACGGGGGAGCGGCCGAGCGCAGACGGGAGGCAGCAGGGAGGA  
AGAGGGGGCAAGGGACGGGAGGCGGAACCAGCCAAGGAGCGGGCAGGAGGACGGCCCTAG  
GGTTGTAAACTGCTTTGTTTGGGAATAATCGACATTACGTGTAATGTTTTGCATGTACC  
ATTCGAATAAGGACCGGCTAATCCGTG

>8189 len=208 tot-seq=1

GCAGTCCCAGAGAACATCTAATTGGTCTGTCAGGGTTAGAATAAGCCCATCCTGATGGCA  
GGCACTGGGAGTCGGGGAGAGGCAGTTTGCAAACACCAAGTTAAGGTGCTGTTGCCAGAG  
TGATGACAAATGGATCCTGTGCACAGGGCCGGGTGCAATGACAAAGGAACTGAACCGAGA  
TGACACTTAGCAGCAACACGAACACGGA

>8190 len=208 tot-seq=1

GACGGCATAACGAGAGGAGAGCGGGACTGGAGGGCAGACGGGGGCGAGGAAGAGAGAAGAA  
GGGAGGCAGAAGGAGAGAAAAGGAAAAGCGACAGAAAAGGGGAGGGAGGGACGAAAAAGA  
AAAAGACAGGACGCGGGCGAGGCCCGGGAAGGGGAAGGAGGCCACTGTAAATCCTTGAAC  
GAGGAGCCAGGGGAGGGCAAGGCGGGTG

>8191 len=208 tot-seq=1

CAGGGATGCCAGTGGGAAGAAGATCAATGGCCGGGCTGTGTGAGGAGTGGCTGACCGTGC  
AAACAAGCCCTGGACAAAGAAATCTGTGAAGAGTTGAAGGGAGCCTCCTGGGAGCAGGGG  
AGCAGCTCCTGCCTGGAACCCCGGGGCGACGGACGGGCAGTCGAGGCTCTCAGGGAAGGA  
GTTCCGCTGCTCTGACCCTCCGCACTGG

>8192 len=208 tot-seq=1

CCGTCTCTGGGAGCTTCAGCGTAATCGTAATTTCCAGGCCAGTCGCCGTCTTGAAGGCGT  
CGAGATGCCTTTAGTCACTCTTACTGCCGCAGAGGCTTTAACGCGCCTTGAAGCGCTGAG  
GAGGCACTATGAGCGATAAATTCGGCGAAGGGCGCGATCCGTATCTTTATCCAGGCCTTG  
ATATCATGCGTAGCCGGCTGAACATCCG

>8193 len=209 tot-seq=1

CCAGTATGGCTCATAGGGAGTTTCTGAACCACAGAGTGGGTAGCCGAGGGCGGCAAAGAG  
CAGCAGAGGCTTGACCAAGACTGGAAAATGAGGTTCCGAGGGAGGGAGAAAGTTGGCCT  
TGGCTTTCTGGCAGGGTGGGGGCTGAGGCCATCTGCCAGCACACCCGAGGATTGCCATA  
TTGTCATTATTTGAGATTCACAAAGACTT

>8194 len=209 tot-seq=1

GGAATCTCTGCGATGGGGCAGCCAGCCAGCCTGGGATCCGAGCCTATGCTGAGCACAGAG  
GGCTTGAATCTACCTTTGAGACCATAACATTGAAGTCAGGCGTACTCACTGTGGTTGGGGC  
ACATGTGGACTTAAGAGGGAAGATATTGAGAACTTGTAGAGCCCAAGAAGGGTCAGGGAC  
AAGTCCCTTTCTTTGTTCACTGGTATAT

>8195 len=209 tot-seq=1

GAGAAATTTTAGCAGCAGGTGTGATCTCACTCCTACTTGGAACCTCGATGTGGTCAACCAC  
ATAAAAATTAGGAGTAGAAGAGATGTGACCTGAGACCGGGGATTGATCCTACTGGGGATG  
GGAGACTGTAAACCAGTGGGTCAATCAGTACAAGTTGGCAGCCTTGTCTCTTCACCTGCA  
TATACCGCATCCATCTCTAAACAGTGAC

>8196 len=209 tot-seq=1

TTAAGTAAAAGATTATCCAGACGGATGTAATCTAATCCCATAAACTCTTAAAAGCCTCTT  
CTGCTGGTGGCAGAAGAGAAAAGAAGTTACAGAGCTGTGACAGAAAGGGAAGTCAGAGAT  
TTCAAAGAATGAGAAGGATTTGACAGGCCATTGCTGGCCTGAAGATGGAGGGGATCATA  
TGGATGGCTTGATAAGGAAATAAATTATG

>8197 len=209 tot-seq=1

AGGAGTGGACAAAGGCTGGACTCACATCTCCTTCTTGGTGGAGTTTGCAGGCCTCTTG  
CTGGAGGCTTTCCAACCTGCTGCTGAGCATCCTGGAGCTCCCAGGAAGTCGGCTCCAGCTC  
CCGGGCCAGCTCCTGGTTAGTGAGTTTCAGCTTGGTATTCTCAGCCTTGGTCTCATGCTT  
GTCATGATGCAGGGCTGTGCACTGACCTT

>8198 len=209 tot-seq=1

CTAATGGCATGCCCTTGCTTGGAGACCAGATTGCTGTGTTGTAATTAATTAGGATGTGGT  
AGCACTGGGGTGGGCGGGCCCTAATTTAGGAGGAATGCTGTCCTCATACAAAGAACACC  
ACATGGAGAGACAGACTCACAGTGGGAATGCCAAGAGGGCATGAGGCAGAGACGGGGTCT  
CCCTGCAAGCCAAGGAAGGCCAGAGGTCA

>8199 len=209 tot-seq=1

GGTGTGAGTTGGGAGTAAGGAGGGGGACTAAGGGATTTGCTATCAAAGATCTGGGTTTA  
TGGCCTTTCTGTGCCACTAAGTCAATATGTTGGTCAGGTAGAGCCTCTGTTTACTCATCT  
GTACAATAGGTATGGCACGGCTATGAGGCTCCCATCAGATACAGTCCAAAGGGCTCTGGG  
AGACTTCCAATCCACTTCCCTCCTTGCT

>8200 len=209 tot-seq=1

CTACAAACAATAAGATTTTCAGGTATATTATTTAGGTGGCAGAATATAAAATTAATATACA  
GAAATCCATAGAATTTATCAAAACAACAACCAGTTAAATGACATAATGGAAACTAGGATG  
TTGTTTACTATAACAGCAAAAATATAAAATGCTAAAATTATACTTAATAAAAAGTTGATC

TCATACAAGTAGAGATTAGAGTAGTGGTT

>8201 len=209 tot-seq=1

GATTGCTTGAGCCCAGTTTGAGGCTGCAGTGAAGTGTGATGGTGCCACTGTAGTGCAGCC  
TGGGCAACAGAGCAATGCTCTGTCCCTAAACATTAATAATGAATCAATGAATGAATGAAA  
TGAGGTGGTCAGAAAAGGACAAATATTGTCCATTTATATGAAGTACATATAGTAGTCAAA  
TTCAGAGACAGAAAAGTAGAATGGTAGTTG

>8202 len=210 tot-seq=1

TAGCTGATAAGACAGTCTGATGATGAAATTGTGGTAACCCAGGTGGAGATGGGTCTGATG  
TCCAGCTCTTCTCCCCACTTCTACTCAAGGTCCCAGGATGGAGCTGACAGAGCCCTTACC  
GAGCGCAGCCGTGCAGAAGGAGGAACAGGAATTGTTGGATCGAACTTCTTCTCTTGGGC  
TGAGTTCAGCCGCTTCTTCGACAAGTGGTG

>8203 len=210 tot-seq=1

TGTGCCAGGCATGACTGGCTAAGCAGACCACAGAGCTGTAAAGGCTCTAGTGACGTGCAC  
ATCACATCTCTATTTAATTTGCCTTGCAATCTACCCCAACATAGTGAAGTTCTTGTGT  
GACACGCTACCACTGTATCTCCCAAACAGCAGACACAAACATCATACAAAAAAATCGA  
TCCAGAGGAGGGTGGGCTCATAAGTGATGG

>8204 len=210 tot-seq=1

GAACTAGCTGGGAGAAGGAAGAGTAAGACAGACAACCGTTAGGAAAGAATTCTGTTTA  
TTTTAGAATCCCTTGGGCTGCATGTGGAGTCTTTTGGCCATTAAGTCTTGAGTCACCT  
CCCCTGTGCCTCCTGGTTCTGAGAGGTGGCTGCTGTTTTCTCCAAGGAGTTGGGAGGCGT  
TGGGAGGATGACAAGATGTTGGAGCTGTTG

>8205 len=210 tot-seq=1

GAAATTATGATGTTGGTTGGTTGCTTCTAGCTTCTCTGGATTAAGTACAAAGGAAAAA  
AAATGAGCTCCATGATAAACTTAACCAATATCGAGCATCTCCTAATACCACAAAGAACA  
GCAATGAATTCAGTGATGAACTGACCAACTTCAGTCTCACATAAATGTTCTAAAGGTTT  
CTAAGTATACCCTGGAAGAGAATCTTCTCT

>8206 len=210 tot-seq=1

AATGAACAAGGGCAGCATCCTCCTCTTCCCTCTTGCTCAGACTACAGGAGGAT  
GCTGCCCTTGTTCACTGCTTCTATCCTTGATCCTTGGGTCTTTGAAAGGCAGCTCAA



G TTCAGCTGCGGCTCACCTGCCTGGTTAGGACCTAGGATCCTTATCCTTCCCTCTGCCA  
CCCTGCATGACCGGCCTCTGTCACCACCAT

>8207 len=210 tot-seq=1

TGGGGAATATTGCACAATGGGCGCAAGCCTGATGCAGCCATGCCGCGTGTATGAAGAAGG  
CCTTCGGGTTGTAAAGTATTTTCAGCGGGGAGGAAGGCGATAAGGTTAATAACCTTGTCG  
ATTGACGTTACCCGCAGAAGAAGCACCGGCTAACTCCGTGCCAGCAGGCGGTAATTTCTA  
GATCGGAAGAGCGTCGTGTAGGGAAGAGTG

>8208 len=210 tot-seq=1

TAGGGAATTTTTACAATGGGCGCAAGCCTTATGAAGCAATGCCGCGTGTGTGAAGAAGG  
CCTTCGGGTTGTAAAGCACTTTTCAGCGGGGAGGAAGGCGTTAAGGTTAATAACCTCATCG  
ATTGACGTTACCCGCAGAAGAAGCACCGGCTAACTCCGTGCCAGCAGCCGGGTAATCTAA  
AGATCGGAAGAGCGTCGTGTAGGGAAGAG

>8209 len=210 tot-seq=1

CCAAGTGA CTGGAGTTCAGACGTGGGCGCGCCGAGCGCCGACGGGAGGCAGCAGGGAGG  
AAGAGGGGGCAAGGGGCGCGAGCCGGAACCAGCCAAGGAGCGGGAAGGAGGAAGGCGCGA  
GGGTCGTAAACTTCTTTTATATAAGAATAAAGTGCAGTATGTATACTGTTTTGTATGTA  
TTATATGAATAAGGATCGGCTAACTCCGTG

>8210 len=210 tot-seq=1

GCCACCTTCTCCTCTCCCCACCGCCCCCTCTCCCCTGCAACACGTCATCTGACAAGTCA  
GTGCGATCTCACTGGAGGTGCATCTCACAGGAACGCGGGGTACAGCCTCCTGCACACAC  
TCCATGCTGCACAGCAAGGTGCACGTGTCCCTCAGAGCCCCAGACACCATCCCCCACTCA  
CCCAGAAGCCCAAGTGATTCCCAACAGCCC

>8211 len=210 tot-seq=1

AGGGGAGGGAGAGCTGATCTGTACAGGGGGCAGCCAGTGAGCAGGAAATGCCCCAGCACC  
GACAGGAAGGAGGGCCGCCTTCTGACACAGGGCGGGCTGGAGACATCCCAGGTGACAGTG  
ATGATGACGGGGTAGCTACCACTTACTGAAGGCCTCCCGCATGCCATGCACTGAACTGTG  
GCTCACCCACATGCTCTCATTTAACCTCAG

>8212 len=210 tot-seq=1

CCGGTCTCCTAATCTGCGTGGGCTGACCAACAAGGAGGTCCGCTCCGCAGAGGAGACTCA

GGTGGATGCTCGCTGTGGCGGTCCCCAGCGAGGGTTGTTGGCACAGCTTCTAAGGGACAG  
ACAGCCTAGTTCAAGGTCCTACTCAGAGTACATCTCAGCCTGCAAGCCATTAGAGGGGAG  
GAAGTTCGCTTCGGATGCAGGGAGAGACTT

>8213 len=210 tot-seq=1

CGTGGATTAAGCGTGTGTGAAATGTAGACGCTCAACGTCTGACTTGCAGCGCGAACTGG  
TTCACCTGAGTGTGCGCAGCGCAGGCCGAATCCGTGGTGTAGCGGTGAAATGCTTAGATA  
TCACGAAGAACTCCGATTGCGAAGGCAGCTTGCGGGAGCACAACCTGACGCTGAAGCTCGA  
AAGTGCGGGTATCAAACAGGATTAGAAACC

>8214 len=210 tot-seq=1

GGCACAGCATGGAGGGAGGGCGCAGGCCAGGGTGGGCCATGGTGGTGAACAGGTGCAGC  
TGGGTGAGGCTCTTCTGCTTAGCCAGGCGCATGGCAGCTGGGGAGCTGCAGGGCAGACCT  
AGCTCCTGGCAGAGCAGGGCTGTGAGCACCAGGCAGTCATCCCAGTAGGAGAAGCAGCCA  
TCTAGCTTGAGGCCGCGAGCCCGCACCAAC

>8215 len=211 tot-seq=1

GGGTTCTGTGTGCTGTTTGTCTTGGCCAGAGGTTCAAAGTTCTGTAGCTGGTGTGGGCT  
TCCATCCTGGCTTTTACCTCCTCTGATTCCAAGCTATTTCCCCTTTAATACCAGTGCAT  
TAGGAGCTCTGCATTTACCTGGCTCTGGGTAGAAGGGAACACAGTTGGGTAGTGGCACT  
ATGGTACAGAGGAAATGTCAGAGACGGGAGT

>8216 len=211 tot-seq=1

TGGGGAATATTGCACAATGGGCGCAAGCCTGATGCAGCCATGCCGCGTGTATGAAGAAGG  
CCTTCGGGTTGTAAAGTACTTTAGCGGGGAGGAAGGCGATAAGGTTAACAACCTTGTCG  
ATTGACGTTACCCGCAGAAGAAGCACCGGCTAACTCCGTGCCAGCAGCCGCGGAGCAGCC  
GCGGTAATGCAAAGATCGGAAGAGCGTCGTG

>8217 len=211 tot-seq=1

TGGGGAATATTGCACAATGGGCGCAAGCCTGATGCAGCCATGCCGCGTGTATGAAGAAGG  
CCTTCAGGTTGTAAAGTACTTTAGCGGGGAGGAAGGCGATAAGGTTAATAACCTTGTCG  
ATTGACGTTACCCGCAGAAGAAGCACCGGCTAACTCCGTGCCAGCAGCCGCGGTAGCGGT  
AATCCAGAGATCGGAAGAGCGTCGTGTTGGG

>8218 len=211 tot-seq=1

GCTGGGCCTGGGCTGGTGTCTGGGGCAGGGGTGACATTGTTAAGAGCTTCCCCTTTACCC  
CAGTGCTCAGGGGCAACCCAGGACAGAGCAGATCATCCCTGGGCCAGCCATAGGGAGTG  
TGAGGCTTGGCGGTACCCCCGATGTGGGTTGACCCCAGGGGTATGGCCTCTGGTGGCTC  
CATGCAGAGCCTCCTCCCAAGGCAGAGGATC

>8219 len=211 tot-seq=1

TAGGGAATCTTCCACAATGGGCGAAAGCCTGATGGAGCAACGCCGCGTGGGTGAAGAAGG  
TCTTCGGATCGTAAAACCTGTTGTTAGAGAAGAAAGTGCCTGAGAGTAACTGTTACAT  
TTCGACGGTATCTAACCAGAAAGCCACGGCTAACTACGTGCCAGCAGCCGCGGGCGGTAA  
TACCCAGATCGGAAGAGCGTCGTGTAGGGAA

>8220 len=211 tot-seq=1

TGTAGCAGGTGTGAGAGCGTCAAAGCAAAGCCACCATGACTGTGGTGCTGCTGAGGACCT  
GAGGCAAGTCCCTTTCTTCTGCACCTCATTTTGCTCAATTGCAAAGTGC GGAGAATATGT  
AGGGAATTTAGTCCAGTGGTTGACATGTGGAAAACCACCAGAAACACGCATGGAGATGTT  
TAATTTTGAAAGAGTCTACCCTGAGCTAGT

>8221 len=211 tot-seq=1

CTGACGTGGAGATGAAGCTTCTGCTGGGCACATGCACATGCCAGTTTCTTTTCTAATA  
GGTCCCCACTGGGTGCTGGCTGCATCAACTGAACATCAGAGAACTAGGAAAGTTCACAAA  
CACTGAGCAGTAGTATCTAAAGCAGTTAAAAATAAAGCCAAAAGGAAGACCAAAAAATC  
CCTCATCACTGAGCGGAGACAAATCTACATA

>8222 len=211 tot-seq=1

CTCTCCGATCTCCTACGGGAGCAGCAGTTGCAGTGGGCAGAGATGGCACACAGTTGCAC  
TCTAGCCCAGGCAACAGAGCAAGACTCCGTCAAAAAATAAAGGTGGTCTATCTTGGTAGG  
CTATTTTTTCCATTCTTTGGTGGGAGATCAGTCTTCGCTCAGGGACTGTATTGTCTGT  
GCCCAGGAGCATCTCCAGTTTACAGGCTTCC

>8223 len=211 tot-seq=1

ACCGCACTGGATGGTGGTGGGGATTTCCATAGCTCTCCGGCGTTTGTAACGCAGCTCACT  
GGACGGGGGCTGGTTCCAGTTGGCAGAGAGGTAGCCAAACTCATCCAGAACTTGATGAT  
TCCCCTCTGGGCTGGAAAGCAAACACCGATAACATCATGTTAGGAGCCAGCCTCTCTCTCC  
CTACATTCAGGTGAAGAGAAAAGGCAGAGGC

>8224 len=211 tot-seq=1

AGAAGTCAATCTCTTCATTCTGTCACCATAGCTTTGCTGTCCTATTCCACCTGGTACTCT  
TTCTTCAGCAACCAGTCACCTTGTGCTTTTCTCATATCCATTGAGTGTTAAACTCATGGA  
TGCCTTCCACAGCAGTGCTCTGTGATTTAGGTCTCTCATTTCCTTTTGGCTCTGATGAA  
TGAACATGTCTTAGGCTCCATTCTTTCTCAG

>8225 len=211 tot-seq=1

TGAGGAATATTGGTCAATGGACGAGAGTCTGAACCAGCCAAGTAGCGTGAAGGATGACTG  
CCCTATGGGTTGTAAACTTCTTTTATATGGGAATAAAATGTTCCACGTGTGGGATTTTGT  
ATGTACCATATGAATAAGGACCGGCTAACTCCGTGCCAGCAGCCGCGGGCAGATCGGAAG  
AGCGTCGTGTAGGGAAAGTGAGGAATATTGG

>8226 len=212 tot-seq=1

AGGGTTCGACCCTGTGGCCTTGCTGGGGAACGGGGAAAGCCAGCGGTGGATCTTTAAAGA  
GACCCCATGAAGGAATGCACAAACACCCAGAGAACTGAGCCTGGCAAGCTCTCAGCGCTT  
GCCCTACTTTCTCCTATGCCATTAATTGATTAATAATTTAAGACAAATTATTAAGCCACT  
GCCTCATGCTGTTTTCAATGCTTAGTCTCTAG

>8227 len=212 tot-seq=1

CAGCAGCCGCTCTGCCAGAGCCGCGGACTTGCTTGTGCTACAACGTCTTCCTCACTCTG  
AAGGAGCTGGGGTGGGGATGCTGGAGGAAATATACTTTAGAATTATTTTTCTCCTGAGC  
CGCCGGAAGGCCGACTGTCTTTGACATGCTAGTTCATTTTTTTCTTTCAGTTTTGCCA  
GGGACAAGAAACAAATGTTCTCTCTGTTAC

>8228 len=212 tot-seq=1

TGGGAATCTTGACAATGGGCGAAAGCCCGATCCAGCAATATCGCGTGAGTGAAGAAGG  
GCAATGCCGCTTGTAAGCTCTTCGTCGAGTGCGCGATCATGACAGGACTCGAGGAAGA  
AGCCCCGGCTAACTCCGTGCCAGCAGCCGGTAATTCGTAGATCGGCAGAGCGTCGTGTAG  
GGAAAGAGTGTGCCAATGTGTAGATCTCTGGG

>8229 len=212 tot-seq=1

GAGAATCACTTGAACCTGAGAGGCAGAGGTTGCAGTGAGCTGCGATCGCACCACTGCACT  
CCAGCCTTGGCGACAGAGTGAGACCCTGACTCAATAAATAAATAAATAGCTATTGGATAC  
TGTTTCTTTTTTTTAGGGACAGGGTCTCTCTATTGCCAGGCTGGAGTGCCATGGCATGA

TCCCTGCCGACTGCAGCCTCAAGCCATCCTCC

>8230 len=212 tot-seq=1

TGCTCATGTGAACATGGAGCGCTACCCCAGCCCCTCAGCACAGCCAGGGGGCCTTGGGG  
TACACACCCTCCTCCCTGGGGCCGCCAGCACCTCCTCTGCCCTATCCCGGATGGGGCCT  
GGGGGTCTGCCAGGGTGCGAAACTGGAATCTATGCTGAAACACCTAAGTGCCAGGAGG  
TGCCCCATGGCCCAGGAGTGACACGGCTCCC

>8231 len=212 tot-seq=1

TGGGGAATATTGCACAATGGGGGAAACCCTGATGCAGCAACGCCGCGTGAGTGAAGAAGT  
CATTCTGATGTAAAGCTCTATCAGCAGGAACGAGACAAGACGGTACCTGACTAAGAAGC  
CCCGGCTAACTACGTGCCAGCAGCCGGCGGTAATGATTAGATCGGAAGAGCGTCGTGTAG  
GGAAAGAGTATGCCAATGTGTAGATCTCGGTG

>8232 len=212 tot-seq=1

GATCGCCAGCGTATCTTTTTGCTCATTCCCAGGGCGCTACAGGACTGCCACTGACCTTC  
CGGGATCGCGGAATGGCACCGTAAAACAGCTGCGTGGTATACGCTGCACTGTTTCAGCGA  
CAACGCAATCAGCGCACATAACCACGGTTCTGACAACAGATGCCACAGTGCCGGATACTC  
CTGCAACGTCGGGAACTGACCCGGTCCGTAAT

>8233 len=212 tot-seq=1

GCAGCACCAGTCTACATTTTTATAAAATGACAAGGGAACACATTATGTATTTCCCTGTGC  
TAGTGGCCCTTTGTGGGACAAACAGAGGGCTTCTATAAAGCTTAGGAAGTATGATTTTAA  
TCACCGGGCAAATTCATAGGTGGAGGCTTGAGCATTTCCTTTATCTCTGTACCAGAATTT  
CCCAGGTATACTCCCCAGCATGTCATCAGC

>8234 len=212 tot-seq=1

TTAAATGTGTCACATTGAAAGCTCCATTACAGTTGAATGTAAAATTTGCCTCTTAAAAAA  
AATAACAAAGATGATTGTGTGAACCTTCCTTTGCCAGACCCCTTCAGATTAGGAGCTCTT  
GGGGCTGCCAGCAGGGTCTGAGACACCGAAACCTCCTGCTTTCTGAGCAGCTGTTTCTG  
GTGCCAGGCGGTGGGAAGGCCATCAGAGGCC

>8235 len=212 tot-seq=1

TGGTGGCCCTGGGGACTTCCTCCCTTTCTTCTCCACAGGAAAGAGGAGGGGCTAGAGG  
TGCTGAAGGAGCAGAATTGGGAGCTGCCCTGCAGGATGGTGAGGGCCTCTGGACCTGAG

GGTCCCTGCTGTGACCATCAAGCAGTGGGGAAGGGTTTGGGAGCCCTGGGCTTCCCTGAA  
GTGCTATGTTTGCCTCTAGAACCTCTGTACC

>8236 len=212 tot-seq=1

CCAGTGCGGAGCCTAGGGATGGGCTGGGGCTTCTCAGGGTGCATCTGCTTCACTGCCATG  
ACTGACTTGACACAATTTCTGTACTTCATAAGGACTTGTCTCCTAAGAGTTACAGTTCCT  
GCAGTGAAGGTCTGTTATTAAGACTGTGAATGTGGAAAACCTTTAATAAAGTCGATCGTT  
ATTTTAGAATAAACTTTTAAAAGAAAAATGTC

>8237 len=212 tot-seq=1

AGAGCCTGGGATGCTTCCATCCATGGACATCTATAATTGGAGGATGGCTGCACTCTATTT  
TGAATAACTGAGTCATCAGCCTCTTGAAGTCATGGAGCTACCTCAGATGACTCCTGCGAG  
TCTTCCAATGCCTGCTCCTTAAACTCTATTGCTTAGAGAAGAAATGGTTTAAACGGAGA  
CTCTCATAAGCCAGTCTAGATCAATATCTGTC

>8238 len=212 tot-seq=1

CTACACAGATGCATGGCCTTGCAAGAGTACATGGCAGGTTTAGAACGACTAAAGCAGTTT  
AGAATCCCAGCTGCTTTCCTACTAGGTTTTACCAATAGGAGGCACTAGAATGAGCTGGAG  
AGTGAGAGAAGCAGTAAGTTGATGTCTCCTGTTGTCCCTGTTTCTCAAGAGTCATGGGCA  
GCTGGCTCCAGCCTTTCATGCCCTTGGGTT

>8239 len=213 tot-seq=1

AGGAGATGAGCTCAGAGGAATTTGTTTGCTAAAGAAGCTGGCATTGTGACCTGCAGCTTA  
TGGGCAGCAGTGAAGACTTAGGAAGAGGAAGGTGGCTATAGCCATCATTTAGTATATTT  
AATAAAAGGTAAGTAAAAGAGAATCTTCCTTTAGTGTTTCAGAACTTCAAACATCTG  
AGAACCTCCAGATGCTGTAAAATCACCACCACC

>8240 len=213 tot-seq=1

TATCTTCAAAGAGGGTCTTCGACAATCCTTGATCAAAGACCTTGCGGTTCTAAGCACAGA  
GTTGGCCTTCTCCTCCTCTCCCGTTTCCACCCTCTCCTGCAAGCAGCCGAGTGTCTCA  
CAGTGCGCCATAGAAGCTGGGTGGGAGGAGGAGGCCTCATGCTGGGAAGGCCCTTCCCT  
TCTCCTCCTCAATGTCCTGCTCCAGGTGAGTGC

>8241 len=213 tot-seq=1

TAGGGAATTTTTACAATGGGCGCAAGCCTTATGAAGCAATGCCGCGTGAACGATGAAGG

TCTTATAGATTGTAAAGTTCTTTTATATGGGAGGAAACGCTAAGATAGGAAATGATTTTA  
GTTTGACTGTACCATTTGAATAAGTATCGGCTAACTATGTGCCAGCAGCCGTAATTGGC  
AGATCGGAAGAGCGCGTGTAGGGAAAGAGTTAG

>8242 len=213 tot-seq=1

GAGAAACTGAGGAAGAGCTTCATGTCCAGGTACCTGGTATTGACCCAGGGTGAGGGTGAG  
ACAGAGATGAGGGGCTCTGGGACCCCCATCCCCTAGAAGGTAGTCCTCAGATCATGGAT  
ACCTCCTCCCACCTTCAGAGAGGGAGAGAGGATGGTCTGGGATGCAAGAGATAGCCTTT  
GGAGTGGACATGTAATGGTGGGCGAGGGAAGAA

>8243 len=213 tot-seq=1

GATCTATGTGAAATAAATGCCTGCTCCAGTGTGGGGAGCAGGGAAGAAAATGTGACTGG  
CCTCCAGGTCATCCAGAACCCTCCCACGGTTTCTCCAAGCACGCTCTGGGACCACTGGC  
AGTGGGATCCCTTAGCGGGACAGGGCAGGCTGGTAAAATGCAGATCTCTTGCCATATCC  
AGACCCACTCAGAGAGGCTCGCTGAGAGTGGGG

>8244 len=213 tot-seq=1

TGTGGGAGCCACTTTCTGGGCTGGCCAAGGCTGGAGCCCGCCCCCTCAGCTTGCAGGGAG  
GTGTGGAGGGAGAGGGCGGAGCAGGAAGCAGGGCTGCGTGCCGCGCTTGCGAGTCAGCTG  
GAGTTCCGGGTGGGCGTGGGCTTGGCGGGCCCCACACTCAGAGCAGCCGGCCAGCCCTGC  
TGGCCCCGGGCAATGAGGGACTTAGCACCCGGG

>8245 len=213 tot-seq=1

GGAGCCACAGTACAAATCCCAAGAGTATCCCTCAGATGTTCTTGGGTCCAAGTCCTGGGT  
AACAGGCTCACATCCTTGCAAAGGGGAAGTGTGGGTTTTCTTTGGGGCCTAAAGGGT  
CTGTGGTCACTGAGAAGTCCTCACAGCCTCAAAGGCAGAGCTGCAGGAGGGGAAGTTGCA  
GTAGCAGCAGATGAGGCTGGGAGAGAGGCAAAG

>8246 len=214 tot-seq=1

GACAAGTCTTTAGTGATGTTTAAGGAGCAATGGGGCAGTCAGTACAGGGAAGCAAAGG  
GCAAACAATGCGATTTGCAAAGCAGGGTGGACTCCTGAGGACTGATATTTTCATTCCTTT  
GTAATAATAGATCCACCACAGAGCCTGGCTGACTCATCTGCCAAATGCTTCTCTAGAGAG  
AAAGAAAGGTCACCAGGGCAAGCCAGCAGCCGCG

>8247 len=214 tot-seq=1

CACACACAAATAGAATAAAAAGTTTAAAGTAATGATTAATTATCGAAGTGGCAGGCACCC  
TTACGTTATTTTTCTATTCACTCTCTCTAGGAAGTAGAGGTTATTTGCAGGACTTAGAAG  
TTTAGGTGACGGAGCTAATCAGAACCCTATGCTCACATTGATATCATCAAGCAGTAGATG  
ATAACACAACAGCCTATAAAGGCCTGGAGTACAG

>8248 len=214 tot-seq=1

TAGGGAATTTTTACAATGGGCGCAAGCCTTATGAAGCAATGCCGCGTGAACGATGAAGG  
TCTTATAGATTGTAAAGTTCTTTTATATGGGAAGAAACGCTAAAATAGGAAATGATTTTA  
GTTTGACTGTACCATTGAATAAGTATCGGCTAACTATGTGCCAGGCCGCGTAATTCCG  
AGATCGGAAGAGCGTCGTGTAGGGAAAGAGTTAG

>8249 len=214 tot-seq=1

TAGGGAATTTTTACAATGGGCGCAAGCCTTATGAAGCAATGCCGCGTGAACGATGAAGG  
TCTTATAGATTGTAAAGTTCTTTTATATGGGAAGAAACGCTAAGATAGGAAATGATTTTA  
GTTTGACTGTACCATTGAATAAGTATCGGCTAACTATGTGCCAGCAGCCGCAATCTACA  
GATCGGAAGAGCGTCGTGTAGGGAAAGAGTTAG

>8250 len=214 tot-seq=1

TTTCAAATAGGATATGTTTCCGTTCACTACCTTCGTTCCGGAACTTTTGCTTGTTCAA  
ATAATCACACAAGTTGCGCACAAACAGCGCACAAATAAAATCACGCCCGCACTATGGCGA  
GCGTGAATACTTAAATCAAATTTTCAGTTTTGTTATTCAGTTTTGTTCAAAGCCGCCAA  
ACGGCGAGCATTGGCCACAGCGTACAAGCTAATA

>8251 len=214 tot-seq=1

GAGACAATGAAGCTGATAAGGAGAAATGGAATCAGCTGAGAAAGGGCTTAAGTCATCTAA  
AGAGTGTGGACTTTATCCCAGGCAATGGGAACCAGCCAGTGTCCCTCAGAAGAAGCACTT  
CTAACATTAAGATACTTCTGTGTGGAACATTTACCAGGCACTACAAAACATTTAGCA  
TCTTGCCAGGCACGGAGGCTCACGCCAATAACC

>8252 len=214 tot-seq=1

GACGGCAGACGAGATCTCTGTGACTGGAGTTCAGAAGGGGGAGAGGAAGAGAGAAGAA  
GGGAGGAAGAAGGGGGGAAGAGGGAGAAAGGGGGGAAAAAAGGAAGAAGAGAAGAAGAGG  
GCGGGAGGAAGGCCGGCGGGGGGAAAACGCGGGGGAGGGGGAGCAAGCCGGCGGGGGAG  
GGGACCGGTCTGAATAAGCGCCGGCTAACTACGGG



>8253 len=214 tot-seq=1

ACTGTGATTTTCAGTATTTGAGAGGTTTCGTTATTTTAGACTTTAGAGATTTTGACCTTCA  
GGGATTTTGATCTTTTGAGATTTCAACATTCAGGATTATAGCATTGGGATGGTGTCTCT  
CAGCATTATGAGCCAAACAGTATGAATAACGAGCTAGAGTCCCCTAGAAAAAATCTGTG  
ATTCATCACTGTAGCAGGACCAGAATACCCTTCG

>8254 len=215 tot-seq=1

GCAGTAACTTTAGGGCCAAGAGAGTGTGATATCCCGAGTGAGGCCTTCTGGGAGCCTCTC  
TGAGTGAGTTACTCAAGCTTTTGAGGAGGGATTTCCAATAATATATGCAGCCACAAAGA  
TCAAGGATCAGAAATACTTCTGTAACAGATAGTGGGTATAGCTATATACTGGGTAACAAA  
ATGTTCTCTTAGGGACAGAGGGCATCCAAGTGA

>8255 len=215 tot-seq=1

TAGGGAATTTTACAATGGGCGCAAGCCTTATGAAGCAATGCCGCGTGAACGATGAAGG  
TCTTATAGATTGTAATAATTCTTTATATGGGAAGAAACGCTAAAATAGGAAATGATTTTA  
GTTTGACTGTACCATTGAATAAGTATCGGCTAACTATGTGCTAGCAGCCGCGTAATTC  
ACAGATCGGGAGCGTCGTGTAGGGAAAGAGTGTGC

>8256 len=215 tot-seq=1

CTAATTTGGGACTGATGCCGGTTCGTTACATGGATAATATGATTATTTACGCGATGGCGG  
GCTACTTTGCTTGTATTAGCAAGGCGCCATTTACAGCAATTCTCTTGATTACTGAGATGG  
TGGGGTCGCTGGCCTTTTATGATGCCGCTTGCCATTGTGGCTGTGATCGCTTACTTAGTTG  
TTGATAGTCTGGGTGGTGCACCGGTGTACATGGCG

>8257 len=215 tot-seq=1

GCAAGAGAGAGCTTGTGCAGGGGAACTCCCATTTATAAAACATCAGATCTCATGAGACTT  
GTTCACTATCATGAGAACAGTATGGGGGAAACCATCCCATGATTCAATTATCTCCACCT  
GGCTCCCTCCTTGACATGTGGGGATTATTAACCTCAAGGTGAGATTTGGATGGGGACAC  
AGCCACACCATATCAAGGAGAGAGGCCAGGTCAG

>8258 len=215 tot-seq=1

GAGCAAACCTATGCAGGCCCATGGCAGCATCCAGGTGGGGTGCCTGCAATTCGGAAG  
GCCAGAGGGTGTGTTACAGTGCTTTCAGCTCTGCCATCTGCAGACAGCTTAAGTGTTAA  
CAGCTCAGTGGGCCCATAGCTACCCTCTGCCAACTAAGGCAAAGAGCCAGTGTGACAGCC

TCCTGTATCTGCACTCATGGCTCCCAAGCTCTTGT

>8259 len=215 tot-seq=1

CAGGGGACGGGAGGGCAGACGGGGGAGATTAAGATATAATAAGGGAGGAAGAAGTAGGGA  
ATATTAGGAAATGGAAGGAAGTATGAAAGAGAAAAGAAGAGTGAGTGAAGAAGGTGGGAG  
GAGCGGAAAGCGCGGGGGTAAGAGAAGAACGAGTGGGAGAGGGGAAAGGGCACACGGGGA  
CGGGAGCGGACCAGAAAGGGACGGCGAACGACGTG

>8260 len=215 tot-seq=1

CAGCATCATACTGCTGGTTTCTGAAACACCTTTTCTGCCCTCCAAGATCCTCTGACATGA  
TCAACATTCTGCATCATCAAGACAAACCTGAAAAGAGCTGTTCTTTGTTCTTTTTGGTG  
GAAAGTGATGAGGTCCTTCCCGTTTGCCTGCGGTGTGGGTTATTTCCACTCTAGGTAAC  
TTCCGCCTTCAGGTACTCCCCATACGTCTAATGGC

>8261 len=215 tot-seq=1

CTCGTCCAGGGCCACACAGCAGAAGGCCCGTGTCTGCTCAATGACTGAAGATACGCGGCT  
CTTTTCTTGATTCTCCATTCAATCGTTGATTCACTCACTCACTGTAACACACGCACATAT  
CCTCTGGGTACTCACTATTCCATTGCACAGCAACCTGAAGGCTTCCAGCTAAGCTTGAGC  
ACCTGAGGACCAGCGACTCTGCCTGGGGGCTTCAT

>8262 len=216 tot-seq=1

CACTCCTTTTTAGGAGTCGTTAGAGTGCTAGACAAAGTGCTCTTGCCGCTTATTGGTTT  
AATAAATAGAACAAACCCTTGAGGACAAAAGAGAACAGACTTTCTCTTAAAAGGCTTGTG  
CAAGACTAGGGAATGGTGCTTCTGCATTGAGTAAATTGATTGTACCCTTCTCGACTCC  
CATTGCGAGAAGTTGGAGCTGAGCAACCAAGTGTC

>8263 len=216 tot-seq=1

CTATTACTTCAGTCAACCTGTGAACAAGATTGGCATATTTTTATATTTAATAAGCCTTA  
TATCAACATTTATCTCAGCTTTACAAGAGTCTGAAACATAGCAGAAATTATTCTCGTAG  
TATGAAAAACAAGTCTTAAAAGCAATTTATCCATGGAGCTAGAGATAGCCCTGAGGTTAA  
GAGCACTTGTTCTTACAGAGAACCAGAGTTCAGTTC

>8264 len=216 tot-seq=1

CAAGTGACTGTGTGCAGCTTGGTGTGTGGACAATAAGCATCCTCCTTGTTGGTTGTATG  
TTTCTCAGCTATGGGATTATTGACGTTTCATGGCGTGAAGCAACTGTACAGAGGTTGCAC

ACACTGAGTATATTTGTGGTTTCTTCAGTTCACACCATACTCGGCATATGACCCTGAGA  
CATATACAGGCCACTGGAAGCAACTGACTGTTCGTA

>8265 len=216 tot-seq=1

TGGGGAATATTGCACAATGGGCGCAAGCCTGATGCAGCCATGCCGCATGTATGAAGAAGG  
CCTTCGGGTTGTAAAGTACTTTTCAGCGGGGAGGAAGGCGATAAGGTTAATAACCTTGTCG  
ATTGACGTTACCCGCAGAAGAAGCACCGGCTAACTCCGTGCCAGCAGCCGCGGTATGTAA  
AGATCGGAAGAGCGTCGTGTAGGGGAAGAGGGTGCC

>8266 len=216 tot-seq=1

TCAACGTGACTGGAGTTCAGACGTGTGCTCTTCCGATATAATAAGGGAGGCAGCAGTAGG  
GAATCTTAAAAAATGGACGAAAGTATGATGGAGCAAAGCCGCGTGAGCGAAGAAGGTTTT  
CGGATCGTAAAGCTCTGTTGTTGGTGAAGAAGGATAGAGGTAGTAACTGGCCTTTATTTG  
ACGGTAATCAACCAGAAAGTCACGGCTAACTACGTG

>8267 len=216 tot-seq=1

CGGTAGTACTGCAGTTCAGACGTGTGCTCTTCCGATATAATAAGGGAGGCAGCAGTGGG  
GAATATTGAACAATGGGCGCAAGAATGATGCAGCAATGCCGCGTGTGTGAAGAAGGCCTT  
CGGGTTGTGAAGCACTTTCAGCGGGGAGGAAGGCGGTGAGGTTAATAACCTCATCGATTG  
ACGTTACCCGCAGAAGAAGCACCGGCTAACTCCGTG

>8268 len=216 tot-seq=1

CCAGCTTCAGGGGGCTTCTTTGAATAGGAAAGGGGAATGCCAAGGGGCAGAAGAAGAGGA  
AAGAAAAGAGGGCAGTTTGATCTGGTGATGTGATTTGTATCTTGGGGACAGCTGTACAGA  
AATACACAGGAAATGGGACCCTGCCTCGAACCTTTCTGTGTTTCAGAAAGGTCAGTAGTGA  
CCTACATGTAGGCAGGTGACCAGGTAGCTGCTCACA

>8269 len=216 tot-seq=1

TCCTACAAGGTGCATTTGCTACTGCATTTTAAAACATTCAGATACAACCTCACCTACCAGC  
AATTGTATCATTTTAAAGTGTATGATTTGGGGGTTTTGGGTATATTCACATGGTTGTGCA  
ACCATCGCCACTATGTAATTCCAGAATATCTTCATCACCTCAAAGAAACCTCGTGCCCA  
TTAGCAGTCTCTCCCAGCCCTGGATGCCCCAGCCC

>8270 len=216 tot-seq=1

CTCATCTCTCTGCCAGAGCAATCTGATTGACAATCATCAATCAGGAAGGACTTCAGAGGT

CTCGTGGCCCCTTTACTACAGAGACTTGCCACAGCCACCTAGCCGGCGAGTGACGGCCTG  
GACCCTCCCCATTTGCCAGGTCTAAGGACATTTATTAGAAAGGACACTGCTCACCCTGG  
CCCTGGACACCTCTGAGACCACTGGGCCTGTCACGT

>8271 len=216 tot-seq=1

GCTAAGCATTGGCATCGTATGCAGGTTGAGTACGTGAAGTCTTAAAGATGAGAGAGTTGG  
AATTTGGGATATACTGCGGCTTGTGCGGCGGTTGAGGACCAGGAAGGCGAGAAAATGTTA  
CCAGCAAAGTTCGGTGGATTCGCATCACGCGTGGGTGCTCTTGCCTCGCGCGCTTTGGTC  
TGGCGTAAGACCAGCGCTAACGACGCCGTTCTGACT

>8272 len=216 tot-seq=1

GGTGGGATCCAGATGCCTGCAGCTGGACTCATTTGTGTTTCTGGATCTCTTGTCTTCCCA  
CCTTCTTTGGACTTGCAAACATCGGGTCACATTTGGAACAAGGATACTGGCAGACAAA  
CCATGTATCCTGAGTAAGAAGGAAAGCTGGGGCAGGTCCCTGCTCTTCCAAGGCCACCT  
GTGTCCATCCCCACACCTCTCCTAGACCATCTCCTT

>8273 len=217 tot-seq=1

TAGGGAATCTTCCACAATGGGCGAAAGCCTGATGGAGCAACGCCGCGTGGGTGAAGAAGG  
TCTTCGGATCGTAAACCCTGTTGTTAGAGAAGAAAGTGCCTGAGAGTAACTGTTACAGT  
TTCGACGGTATCTAACCGGAAAGCCACGGCTAACTACGTGCCAGCAGCCGCGGAGAAAGA  
TCGGAAGCGTCGTGTAGGGAAAGAGTGTGCCAATGT

>8274 len=217 tot-seq=1

TAGGGAATTTTTTACAATGGGCGCAAGCCTTATGAAGCAATGCCGCGTGAACGATGAAGG  
TCTTATAGATTGTAAAGTTCTTTTATATGGGAAGAAACGCTAAGATAGGAAATGATTTTA  
GTTTGACTGTACCATTTGAATAAGTATCGGCTAACTATGTCCCAGCAGCCTAATTAACAG  
ATCGGAAGAGCGTCGTGTAGGGAAAAGTGTGCTAGGG

>8275 len=217 tot-seq=1

CCGCCTCCCTGTGTCCCAGCACTGGGGAACACAGTTCTGACTGCTCTGAGGAGCTTGTT  
TGGTGAGCCCATTGCGCTGTTCTCTCCGTTCTGGCGAGCCTTGACACCAGTACCCTCA  
TCTACAATGACACCCAAACTTCCACCTTGGCCTACAGTATCATGTAAGCAATTTGGAAAT  
TCCTTCCAAAATAAGTTTCTAAAGCCAAGATCCCCAT

>8276 len=217 tot-seq=1

GGCAATCTTCTGTGTCCTAAGAATCAATTCTTTTTCTCCATTGTTTGTGTTAGAAAA  
CAAGATGCCAAAATCCAAACAAAACCAGGAACGAGGTGGTTCTGGAGCTACCGCACAGCA  
GCAGGCAGACTGACCACACTCCCGACTGGGAGTATGCAGCCGACTGCACCGTCTTGTCTT  
TTCCGCTACACACACACACAAGTGAAGAGGGTGT

>8277 len=217 tot-seq=1

TGTGCTCTTCAGTTACAGAGGGCTATAAGTAGCAAGGGAAGACAGCAGAAAAGCACTATG  
GTTTTACATAACAATCATCCGTTTGAAAGGGAAATCCGATATGATTGATACTTCTTAGGG  
TCATCTGCATATAATTCCTCAAATACTGAAAAACAGGCACAATGGATATTTGTTTTTG  
TCTGTGTGTTGAGGGAAATGCTATCTTTCAGCAAAA

>8278 len=218 tot-seq=1

GGTGTATTTCCTCCAGAGCTGAGCCAACCATTACAGACATAAGTACAATAGTTCTGTG  
GTTCTTTAGTGAAATGTTGAGTAGAAGGTGGCATTGAAAGACAATCCCAATCATGCCA  
GGTTGGGAAGCAGTGATTTGCAGACGTTCTAATAGCACAAACAGGAATGTAGGCTATGGA  
TTTACCCCGGGTCTGTTGGACTCTGATGGCTTACATA

>8279 len=218 tot-seq=1

GCGCGCGGGGACGGGAGGGCAGACGGGGGAGAGGAAGAGAGAAGAAGGGAGGAAGAAGGA  
GGGAAGAGGAAAAAGGGGAGAAAGAAGGAGGGAGAAAAAAGAGGGAGGGAAGAAGGGG  
GGAGGCGAGGAAAGCGCGGGGGGGGAGAAAGAACGGGGGGGAGAGGAACGGGGCACGCAG  
GGACGGGAGCCAACCAGAAAGGCACGGCGAACGACGGG

>8280 len=218 tot-seq=1

CCTGGCTGAGGGAGGGGTGTCCGCCATTGCTGAGGCTTGAGTAGGTAAACAAAGCAGCTA  
GGAAACTCGAACTGGGTGGAGCCCACCACAGCTCAACAAGGCCTACTGCCTCTAGACTCC  
ATCTCTGTGGCAGGACATAGCTCAAAAAAGGCAGCAGACAACCTTCTGCAGACTTAAAC  
GTCTCTGTCTGACAGCTCTGAAGAGAGCAGTGGTTCTC

>8281 len=219 tot-seq=1

ACACCTCCACAATGCAGCTCGGAAACAGAATTTCTATAGATCTGCTGCTTTTTTTTAA  
ATCACATAGAAGAGTTTGTACAAATCTCATTTGTTTTCACTTCCTTCATTTTTGTGTCTT  
AACACATTATTTGAGGAAAATGCCTCTGAATTTTATCCTTGCTCTTCAATTACGGTTGA  
ACAGGAACTGTTAATTGAGTTTAGCCACTCAAAGAAGA

>8282 len=219 tot-seq=1

ATTAACCTCGTGACTGGAGTTCAGACGTGTGCTCTCCGATATAATAAGGGAGGCAGCAGT  
AGGGAATCTTCCAAAATGGACGAAAGTCTGATGGAGCAACGCAGCGTGAGTGAAGAAGGG  
TTTAGGATAGTAAAGCTCTGTTGGTAGTGAAGAAAGATAGAGGTAGTAACTGGCCTTTAT  
TTGACGGTAATTACTTAGAAAAGTCACGGCTAACTACGTG

>8283 len=219 tot-seq=1

TTCTGGGTTTTTTGTTGGTTTTAAACACATTAGGTTCTAAGAAATGTTGCTGTGGGACCC  
TTTAACATAGTTTAACACAGAAGGGAGAAAAGTCTTCTTCTCACCTAGCAACTCACT  
GCTGCTGTGCTATTACAACCTTAGCAAGGATTGAGAGCACTGGTAGCTGGAGGGGCTAGCA  
AGGATCTGTACCTGGTGAAAACATGAACATAGCAGAGG

>8284 len=219 tot-seq=1

TCGCCAGGGGACGGGAGGGCAGACGGGGGAGAGGAAGAGAGAAGAAGGGAGGAAGAAGGA  
GGGAAGAGGAGGAAAGGGAAGGAAGGAGGAAAGAGAAAAGAAGAGGGAGGGAAGAAGGGG  
GGCGGAGCGGAAAGCGCTGGGGGAAGAGAAGAACGAGTGGGAGAGGGGAAAGGGCACACG  
GGGCCGGGAGCGTACCAGAAAGGGACGGCTAACTACGTG

>8285 len=219 tot-seq=1

GGGGTCAGCAGGGAAAGGGCGTGCGGGCCAGGCTGTGGCCTGCTATGACCCGTGCCTCTC  
TCCCCACAGGCCGGCTGGATCCTGCAGGCAGCTGTAGCCGTTCCCTGGCCAGGTAATGC  
CTTTGGGCTGGGCAGTGGGTGGGCTCCCTGCTCGCCCTCAGGCTCACGCACCTCTCTCCC  
CGTCTGCAGCCGGGCAGTGCAGCGCAGCCTGGCCATCAT

>8286 len=220 tot-seq=1

GCAGGCAGACAGAGATGGGAAAGGGAGAGAGGGAGGACACACTATAATTTAGCTCATAGT  
TCCCAAATGTCAATGACTTCAGTTGTGACTTGTCAGTGACTCATATACTGTCACTAGACT  
CCAGCTTGTCTTCTCAGCATGTCTGGTTCTATTCTCAAGTGTCCCTTCAAGATCAGAGGA  
TGGCAGCAGCCACAGTCCTTCTGTCTTCTCAGTTTATAAT

>8287 len=220 tot-seq=1

CGGCAGCGGCAGCAGCAGCATCCTAGCCTGACATTTAAACTTCCAAGTGATTTCTTGGC  
TTCTCAGTTTCTACATCTGTGCAGGCTTCTACTGGCTGGCTCCTGCTGCCAGCTACACTC  
TCAGATCTGTGCATGAGACTTACCCAACCTAGCCTTCAAGGCTAGCTCATCTAGCTTCTC

CCAGTTGGCCTGAAGGGCTCACGTGCTGCAGCCCATGACC

>8288 len=220 tot-seq=1

TCTGGCAGGGGGAGGGGCGTCTGCCATTGCTGAGGCTTGAGTAGGTAACAAAGTGGCCG  
GGGAAGCTTGAAGTGGGGGAGCCCACCGCAGCTACCAAGACCTGCTGCCTCTGTAGAC  
TCCACCTCTGGTGGCAGGGCATAGCAGAACAAAAGGCAGCAGAACTTCTGCAGACTTAA  
ACATCCCTGTCTGACAGCTCTGAAGACAGCAGTGGTTCTC

>8289 len=220 tot-seq=1

GACAGGGGACCCAGGGCTCACAGGGGCTTCCGAATGATGGTCACAGGATTAATGTTTAC  
AAGATAATGCCTGGGATGCCGGTCTTGGGCACAGGAACCTTATGTCTGTTATGCTCGTT  
GCTGTTTCCCTAGAGTGGCACTCACCAGTCCCCAGGGAGTGTCTGGTGGGAGACTAGGA  
GGCAAGAGACTCAAGGGTAAAATGAGATAGAGACAAAATC

>8290 len=220 tot-seq=1

GTGCGTAGGTGGGCTGTAAAGTCCGCGGTGAAAGTTTGTGCTTAACGATAAAAATTGCCG  
TTGAAACTGGTAGTCTTGAGTATAGATGAAGTAGGCGGAATGCGTGGTGTAGCGGTGAAA  
TGCATAGAGATCACGCAGAACTCCGATTGCCGAAGGCAGCTTACTAAGGTATAACTGACAC  
TGAAGCACGAAAGCGTGGGTATCAAACAGGATTAGAAACC

>8291 len=220 tot-seq=1

GACTCGGTGGAGGATGGACAGAAGGAGGAGTCTAGGCCAAGGGCCTCACCCCTGGCTGAA  
GAATCGCTGGGGCTCAGGAGCCACAGATGCTCGGATCCCGCCTCCAGGGTTCCCAATCTC  
ATGGGACACTGGTAGTCAAACACCCCGGATGGCTCTGATGCGCAGCCAAGGCTGTGCGT  
GACTCTGGGGCCAGGGCTAGTGGCTGTACTAAGGGCCAC

>8292 len=221 tot-seq=1

GATCCTCTTCTCCTCTCAGAATCTGGGAGGAGCTCAAAGTGGGGGGAGGGGGGAGGGGC  
TGCTGCAAGTGTAAGTCCCTCAGGAGCCCTCCACAGACAAAGCAGAACTGTCTGACCTGGT  
GGAGGCTCCTTGCCAGCCACCAGCGCCGCTTAGAGAAAAGATGAGAGCAGGGATATAGGGT  
GCTAGCCACCGCCAGAGCCGCGGAAATTTCTAGATCGGAAG

>8293 len=221 tot-seq=1

TCCACGTTAGTGATCAGAATAAGACCTAAAGAGTGAAGCACAACTTGCAGGAATGCTGAA  
ATCAAATGCTTTTTTCTAGATGTTTTGATTGCTAAAACCTGTGTGATTTACGAAGCT





CAGGGGGCTGGGGAGGCCTCATAATCATGACAGAAGGCAAAGGCACCTCTTTCATGGCAG  
TAGCAAGAAAGAATGAGAGAAGTAAAAGCGAAACCCTTTTTAAAACCATCAGATCTTGT  
GAGACTTATTCACCTACCATGAGAACAGTATGGGGGAAACCGC

>8300 len=222 tot-seq=1

ATCCCTATTCATCCTGAATTGTAAGGGCTGGTTTGCTTGTGTCTACTCCCTCCGATCTG  
AGTGTTCCATGACGGCAAAGGCTGTGTCTGCTGGCTTACCATGGAACCCCATCGTACTCC  
TAAACTACCTGGACACAGTAAGTATCCAACGAACACTTGAATGAGTGAGTGAGTAACAGA  
AAGAATGAATAAACTTTGTAGCTAAGTCTCTTGCCTATTCTT

>8301 len=223 tot-seq=1

TGGCTGGACTGTAACCTCAGACATCCTCTAGTCTGCACCACCCGATTGCTAGGATAAA  
TGTGTTCCGACAGGCCTGGCCATCCTTGTCTTTTGATACAAAGTTTCTTGCTACACTTG  
GCAGCGTCTTCTGTCTCTACCTCCTCAGTTCTGGGAGAGCAGGCATGCGGTTACATTTT  
AAGGGAGACAACCTCAGGTCTTCACCTTGCATCTCACTAAGAG

>8302 len=223 tot-seq=1

CGAGAGACGAATGTGACTGGAGTTCAGACGTGTGCTCTCCGAGCGCCGACGGGAGGCAG  
CAGTAGGGAAGCGGCCACAAGGGACGCAAGGAGGATGGAGCAAAGAAGATGGAGTGAAGA  
AGGTTTTCGGAGAGGAAAGATCTGGGGGGGGTGAAGAAGGAGAGAGGTAGTAAAGGGCAT  
TGATTTGAAGGGAATCAACCAGAAAGGCACGGCTAACTACGTG

>8303 len=223 tot-seq=1

TCATAGGCCATCACAGCAAGCAGGGAGGATTCAGTGCCCCAGTGGCAAACACAAAGAAG  
ACCTAAGCCATGCAGCCCTCTACTGAGATGGTTTTCTTCTCAGACAGGAGGTTCTCCAAC  
AGCTTAGGTGCAGTGACAGAGGAATGGCAGAGATCCAAGAAGGACAATTGTCCAGGAAG  
AAGTACATGGGTGTGTGGAGGCAAGAATCAGCATTAAATCACCA

>8304 len=223 tot-seq=1

TTCAAGCAGAAGACGGCATAACGAGATCTGATCGTACTGGAGTTCAGACGTGTGCTGGAG  
GCAGCAGTGAGGAATATTGGTCAATGGGCGAGAGCCTGAACCAGCCAAGTCGCGTGAAGG  
AAGACTGCCCCAAGGGTTGTAACTTCTTTTGTATGGGATTAAGTCACCTACGTGTAG  
GTGTTTGCAGTTACCATAACGAATAAGCATCGGCTAACTCCGTG

>8305 len=223 tot-seq=1

CAAGCAGAAGACGGCAGACGAGAGCGCCAGGGGAAGGGAGGGAAGAAGGGGGAGAGGAAG  
AGAGAAGAAGGGAGGAAGAAGGGGGGAAGAGGGAGAAAGGGGGGAAAAAAGGAAGAAGAG  
AAGAAGCGGGCGGGAGGAAGGCCGGCGGGGTGGAAACCGCGTGGGAGGGGGAGCAAGCCG  
GCGGGGGAGGGGACCGTGCGAAGAAGCGCCGGCTAACTACGTG

>8306 len=223 tot-seq=1

CCAGGGTGAGCCCTGCAGGGTGTCTCCTCCCTGATGACAAGTCCTCCTTGCCTTGTGCA  
GAACACCTCCAATCATAGGATACCTGCCTTTTGAAGTGCTGGGAACCTCAGGCTATGACT  
ACTACCACATTGATGACCTGGAGCTCCTGGCCAGGTGTCACCAGCACCGTGAGTACCACT  
GCCAGCCCAGGCATGGGGGCCTTGC GTTCACTCCACTGGGGC

>8307 len=224 tot-seq=1

CTCTCCTTGTCTATCAGATGCTGACAAATCAGCCTACCTCATGGGGCTGAACTCAGCTGA  
CCTGCTCAAGGGCCTGTGTCACCCTCGGGTGAAGGTGGGGAACGAGTATGTCACCAAGGG  
GCAGAGTGTACAGCAAGTGTACTATTCCATCGGGGCACTGGCCAAGTCAGTGTACGAGAA  
GATGTTCAACTGGATGGTGACACGCATCAACGCAACCCTGGAGA

>8308 len=224 tot-seq=1

GGATGCAAGACCTGAATAGAGGCCTGCGCTCATTGATTTGATTTGATTTTCCTTCTAGA  
TAACTGGCTCAAATACCTATTGTTTTCCCTTGATCTTAAGGCAGCATTTTCAGGACAAGC  
AGGAGAGTCTCTACTTGCCTTACCTCGGGCCATAAACCAGGGGACAGCACCACTCCTG  
GCCGGCAGAGATGTGGCGCCCGCTTGGTGTCCGGCTTGCAGAAC

>8309 len=224 tot-seq=1

GCTTAGAGGGTAAGAGCCCACTGCCTGGCTCTCTTGGCTTCCCTGTGCCTCTGTTTCTT  
TATCTGTATAGTGTAATAATAACAATCTGACTTAATAGGCTTCTTATGAGGGTTAAAGA  
GAGAGGCATGTAAAACGTTAAACTCGCCAGGCCAAAGCAATGAATAGATATCGGCAGA  
TGTGAAGATCATCTGTGCCAGGCAAAGCCAGGGATCTGGCTG

>8310 len=224 tot-seq=1

GGTGGTTGAGTTTGGCAACCACTTACCTTGATTCCATATAAAAACGGTACTTGGAGTGTA  
TTGGTCATTCTGTTCTGCTTCTCGGCCAACTTCTGGCCAGAACACTGAGTTGCTGGGC  
GTGGTGGGAAGGCGGGGAAAAGGAGAGGTTTCGAGCCAACGTTTACGGGGGACTCCACTCT  
GCCATTAGCCGTGGCTGCAGCATCGAGTTTGAGGGAACCAGCCT

>8311 len=224 tot-seq=1

GCTCCCGAGCAGCAGGCGGCGCTGCGCACACTGAACACCGAAGCGGCTACGCTGCAAAGT  
CAGTTCCAGCAGCGACTGCTGGGAGCGGCAAAAAGCGGCGGCCTGGTGGTTGATTACAGG  
CATCAACTGGCCGGCCTGAGCGATGAGGAGATAGCGGCGGCGGCTGACGCAGCGCGTGAA  
AGAGGGCTTAGCGACCGCTGGTTGCTGACGCTGACCAATACCAC

>8312 len=224 tot-seq=1

GCAAGTGC GCGCCAGTGGGGGCCACCTGCAGAACTCTGTGTTAGGTGGAGTCTGCCAG  
TGAATAAGCTATGGCAGTGGCCACTGGTATGTGGCTCTGCTAACTGCGGCCACATTACAG  
GTTGGTGTGGCCAGGCAGAGACTCTGGGATAAACCAGCAGACAGAGGGGTGCTCAGATCA  
AACTGCCTCTGTCCACAGACAAGTTAGTCCTGCTTTATCCAGG

>8313 len=224 tot-seq=1

AAGGGCACGCAGGCGGTGACTTAAGTGAGATGTGAAAGCCCCGAGCTTAACTTGGGAATT  
GCATTTCACTGGGTCGCTAGAGTACTTTAGGGAGGGGTAGAATTCCACGTGTAGCGGT  
GAAATGCGTAGAGATGTGGAGGAATACCGAAGGCGAAGGCAGCCCCTTGGGAATGTACTG  
ACGCTCATGTGCGAAAGCGTGGGGAGCAAACAGGATTAGATACC

>8314 len=225 tot-seq=1

GAAGAGAGAGTCACTGGCCCTGGCTTGAGCTTTTGAAAACCTCAAAGCTCACCTGCATTG  
ACATACTTCATCCAACAATGCCACTCCTCTAATCCTTTCCAATAGTGCTACTCCCTGGT  
GACCAGGCATTCAAATCTATGAGCCTAGGAAGGCCATTCTCATTTAAACCACCAGTTACT  
TACTGAAGTGTGCCTTTGAAGGGTTTATCTTATCACCAGACCATT

>8315 len=225 tot-seq=1

TTCCCTGGCATCTCGTCCACGTAGGCACTGGTACATAATTTATAGACAGTGTACATTCTT  
GTATCGTTGAGCTCGACTTTTGGCAGAGAACGGGAAGCAGGTGACCTTGGTAATTAAG  
TCAGAATCAAAAAGAAATCCCAAATTAGTTCAAATTACACCTCAGGAATGCCAGAGATG  
CTCTCTCCTCCTAGGCAACAACAGCTGTGCCCTCTCTCCTGAGG

>8316 len=225 tot-seq=1

TAGGGAATTTTTACAATGGGCGCAAGCCTTATGAAGCAATGCCGCGTGAACGATGAAGG  
TCTTATAGATTGTAAGTTCTTTTATATGGGAAGAAACGCTAAAATAGGAAATGATTTTA  
GTTTGACTGTACCATTGAATAAGTATCGGCTAACTATGTGCCAGCAGGTAATCATAAGA

TCGGAAGAGCGTCGTGTAGGGAAAGAGGTCTTGTAGTGTAGATCT

>8317 len=225 tot-seq=1

CCCGAAAGCCGTTCTATGGTGCAGCCTGTCAGCATGCCGCAGCGCAGACTGCACGTCAT  
CACCATAAGAAGTGACAAAAGCCTGCCAACAGAAACGGCGTCAAAAATTTTCAGCCCGGA  
CAGCGCCATGAGAAAGGCCGCCACCGTTATGAGGATGGAGCTTGCATGACGTATCTCCTC  
GGCCTCGGTTCGTATTCTCCCGTTCCGACAGCGCCTCGCGGAAAAA

>8318 len=225 tot-seq=1

ACAGCCGCCAAAATAACCAGCATGGTGTGTAACATCCCCCAGTGGGGGCTAGAATTCC  
CCATGGTGACCTGTGACCTGCTCCCTGAGACAGGGGAGGCCAGGCAGGTCACGGTGGGGA  
CGCAGCAGAACATTATTTCTCCATCTTGCTGTTTTCTAGCCTTGAGTTGGGGACATGAGT  
GAGAACTGGGGGTTTTGAGGAGTAACCCTTGTGAACACATGTACT

>8319 len=225 tot-seq=1

GTGATGGGGACCATGAGGCTCCCCAGGGAGCCTGTGGGAGGGAGGCGCCTGGGCACAAGA  
CCCAGGGACAAGGCTGCCAGTGTGCCCTGTGCCCTTCTCTCCACAGCCGTGGTCTCCTCCT  
CTGGGGGCTCGGGCTACAGCGGGGGCGGCGCCTCTGCATGACCGGGGGCGGCTATGGCT  
TTGGCAGCAGCGGCTTCAGCAGCAGCGGCGGTAGCTTCAGCTCCA

>8320 len=225 tot-seq=1

ACCAGAGAGGACGTCCCCAGCACCCCGAACGCTGCAATATTTTCATAAATGTAGAAAAAG  
TAGTAGTGTCTCAAGCAACCTTTATTTACCCCCAGCTTGCTTCTCTTTCTATGGAAG  
GCTTCCTTATTGTCCACGTGCTCCTGAATAATGCATGAGCCTCAGAGTCCGCCAGGCCA  
GGAAGCACAAAGGCCCGTGGTGGGGGCCCTTCCAGGCAGGCACC

>8321 len=225 tot-seq=1

AGAGTTGGAAGAGACATCTACAGATAAAATAAATAATCCAACCCTACTCATTACTATACA  
TGAAGAACTGACTTCCAGAGAAGTTGAAGGACATAAGTCACCCAACAATGGATGACCAG  
AATCAGACTTTTCTCCAGTCCTTCTTGTGGTTAATGGTAGGTTCCCTTTCTTCGTCC  
CTAAGAACTAGCTTTTCTTACACTTGTACCAACTCCTTTAATAG

>8322 len=226 tot-seq=1

AATCGCTGAAACCTGGGCGGCAGAGGTTGCAGTGAGCCAAGATTGTGCCACTGCCCTCCA  
GCCTGGGCAACAAAGTGAGACTCCATCTCAAAAATAAAATAAAATAAAATAAGAAAAACC

TAAATTAGAACACTTGAAAAAGAGTTACTCTAAGACTCAATTTTTTACCTGTGAAGAAAA  
AACTTCATCCCTGACCCTGGGTCTGCTGATTCAAACGCAGTCAAG

>8323 len=226 tot-seq=1

CATACGATAGCGACGCGGGACGGGAGGGCAGACGGGGGCGAGGAAGAGAGAAGAAGGGAG  
GAAGAAGGGAGGAAGGGGGAAAAAGGGACGAAAGGAGGAGGGAGAAAGACCAAGGGAACG  
AGGAAGGGCGGCGGAGGGGAAAGGGCGGTTATTTAGGAAAAAAGCGTGCTAGGAAAGGA  
GCGCGCCTTGATGGTACTAATTGAATAAGGGACAGCGAACGATGTG

>8324 len=226 tot-seq=1

TTCAAAGCCAGCCTGGGTAACATAGCAAGACCCCCCTCTCTAAAAAAGCAAAAGCAAA  
ACCAAAACAAAATGCTCAAGAGGACAAGGTTTGGGGAGCTTCTAGTAGCTGAAGACCTG  
GAGATTCTGGAGGGCAGTGCGCCAGGGAGGGCATGGAGGGTCCATGCTCCTTTTTCCA  
TACCTCACCTATGCATCTTTCATCTGTAATATACTTTATAATCA

>8325 len=227 tot-seq=1

GTATCTTGAAGTGATAGGGGCTACAGTGAAGTTCAGGGGTGGGTTCTGACGAAGGGTGA  
TAGTGGATGGAGGCAGAGGTTTGGGAGACAGTTGGTTTGGCTTTGCTAATACCTTGCTGG  
GATCTAAAGGGACCGTGGGTCCCATGAGGTCTCGATGGAGCAGTTGAATGGTAAACAGGA  
GTCCAGATCACAGCTAGAGATATAAAGTCTTAATCCCCATATCTTA

>8326 len=227 tot-seq=1

TTTTTTTTTTCAAGCAGAAGACGGCATAACGAGATGTAGCCGTGAATGGAGTTAAGAAGT  
GTGATATTAAGATATAATAAGGGAGGAAGAAGTGGGGAATATTGAAAAATGGGAGAAAGA  
ATGATGAAGAGAAGCCGAGTGAGCGAAGAAGTATTTCCGGTATGTAAAGCTCTATCAGAAG  
GGAAGAAAATGACGGTACCTTACTAAGAAGCTCCGGCTAAATACGTG

>8327 len=227 tot-seq=1

TCCCCAGTGCGCTCACGTCACTTGCTTTCATCTGTGGGAACTCCCAGGAAGGTGTGGGAG  
GAGGAGGGTCGGCCAAGGGCACTCACATAGACGGCGAAGTCCTTGGGGGCGCTGCTGATG  
TTGCCTGTTGGCGACAGCGTCTTAGGGATGTGCTCCAGAGTGAAGGCGGCTGGGTGGATC  
ATCATGGAGAGCCTCACCACCAGGTACCCCTGGGAGCCTTTAAATGC

>8328 len=227 tot-seq=1

AGAAGACGGCATAACGAGATTAGGCAGTGAAGTTCAGACGTGTGCTCTTCCGATACG

GGAGGCAGCAGTGAGGAATATTGGTCAATGGGCGAGAGCCTGAACCAGCCAAGTCGCGTG  
AAGGAAGACTGCCCGCAAGGGTTGTAACTTCTTTTGTATGGGATTAAAGTCACCTACGT  
GTAGGTGTTTGCAGTTACCATACGAATAAGCATCGGCTAACTCCGTG

>8329 len=227 tot-seq=1

CTCATATGTTGACAGCTCCCAATCCCCACTTCTGGAGCAGATTTTCCAGGGGGAAGGACA  
TTACAGAGTCCGGATGCCTCTTCCATGATTCCAGCACCTCTAATGTTGTAAGGCCGTGTT  
ATGAGCACCTAAAGATGGCACTTCAGCACACGGTTCTCGAAATTCTGACCATTCTATCT  
TCTTTTAAATCCCTCTGTTTTTCCAATCCTAAAGCCCTGTGACACA

>8330 len=228 tot-seq=1

GAAGGGCCAACCTGGGAAGGTAGACTAGGATAAGCAATTAAGGTGAATTGTCAGGTGACAA  
TCTATTTAGAAAAGTTCAGATATTCGTTTTCTTATCACGACTAATGTGTCTAATCTCTCC  
TACACAAGTTGGACCAAAGATTTAAAGATTTAAAGCCTGTGCTAACACTTCTAAAGGAAG  
CCTAGCAAACAGGCAAGAGGCCAGGCATCATGGCCCATGCCTGTAATC

>8331 len=228 tot-seq=1

CAGTCCTCCTACTGTCACATACTGACCTTCCCGAATCCATGCCTACACTCTCGCCTTCTC  
TCCCATTACAGAGGAAGACAAGCCTCTGTTCTGTCTGAGGCAGCCTCTTTGCTTATACT  
CTGGATTCCAATTCTCATCTACTCAAGGACTTTGTTCTCAAAGCACTCCACCTCCCACCT  
TGCAGCATCCATTTCTCACTTTTCACTTACTTGCATACAAAAATAT

>8332 len=228 tot-seq=1

CATAGTGATAGTAGTGGTGGGTTGGCAGGCACCCAAAACCTCTGAGAGAGGGGAGCCCTTC  
TCTTAAGCAGAGGCATTGTGCTTCCAAGAGTGTGGGGCAAATCTCCATTGCTTTTTTCTC  
TCTGTCCTTCAGTCTGGCTCCAGATGCAGACACAGTCACAGGAAGGGCACAGCAGAAGAA  
AGAAATTAAGCCCCAGCTTTCTGGCTAGAGAACCAAAAAGGAAGGCC

>8333 len=228 tot-seq=1

GGAGGAAAGAGAAATGGGGGCTGTGGCTTTGTGTTCTCTGGACTCTTCAAATGTGCAAA  
GAAATAACTTAGCAAAGAGGATGCCAGGGAACAGAGGCTGGGCAGGTCAGGGTGTTC  
TTTTGCAACCTCAGAGAGAAGCTGATGAATGAAATGGAGTGAATTCTCCTGGGAATACC  
TGAGGTTGGCCATCACCCAGCTGTCCTCCCAGCACAGGAAACAGGCC

>8334 len=228 tot-seq=1

TTTTTTTTTCAAGCAGAAGACGGCATAACGAGATCTGATAGTGAATGGAGTTAAGAAGTGT  
GATATTAAGATATAATAAGGGAGGAAGAAGTGGGGGATATTGAAAAATGGAGGAAAATAT  
GATGAAGAAAAGAAGAGTGAGTGAAGAAGGCTTTTCGAGTCGTAAAACCTCTGTCGTATGGG  
AAGAAAAAATGACGGTACCATAACAAGAAAGCCCCGGCTAACTACGTG

>8335 len=228 tot-seq=1

CATACGAGAGCGCCAGGGGACGGGAGGGCAGACGGGGGAGAGGAAGAGAGAAGAAGGGAG  
GAAGAAGGAGGGAAAGAGGAGGAAAGGGAAGGAAGGAGGAAAGAGAAAAGAAGAGGGGAGGG  
AAGAAGGGGGGAGGAGCGGAAAGCGCGGGGGTAAGAGAAGAACGAGTGGGAGAGGGGAAA  
GGGCACACGGGGACGGGAGCGGACCAGAAAGGGACGGCGAACGACGTG

>8336 len=228 tot-seq=1

CGCTCTAGACTTCAGCCAGGGGCACAAATCCAACCTTTCCATTGAGCTCGAGGGCAGTAA  
AGCAACAACAAAATCCTTCAATTTGGAGTCAGCTGGGCAGAGTGTTTCTTTCATTGAGAT  
CGCTATGAAGGAGGCATACTGGAAGCTATTGGTGAACCTAAACATTTTCTATCTGGGAAA  
GAACAATGCAAGGAAGACAGAAGAGAGCTGGGTCATACAATGCCAGAA

>8337 len=228 tot-seq=1

TGCAGTGAGTCGAGATCGCGCCACTGCACTCCAGCCTGGGCGACAGAGCGAAACTCCGTC  
TCAAAAAAAAAAAAAAAAAAAGAACTAAGGGTCCAACAGAGGCATCTCTGATCAAATCA  
GAACCTTTTCATTTCACTCTGCCATAACAAGATCATGCTTTGAGCCGTTGTTACTATGACG  
TCTCGGAAAAGCGTTACAGAGAACTTCATATTTATAATTTACTGTTG

>8338 len=228 tot-seq=1

ACCGCGGAACAGCGGTTTCGAGGTAGAGAGCGGTTGCTCGGTCGAAACAAGTCAAACC  
TATTCAGGCTCGAAAAAGCCTTTTGCCTCTGTCAAGTGCAAAGCTGCCTGCATTTTTT  
CAGCGGTCTCCGGCATAAATGGAGCAATATATACTGACCAATCGCAGAACTTCACCTA  
AATTGCGCAAAACCGCTGCCAGGCGTTCCTGCTTAGTCGGATCTTTAG

>8339 len=229 tot-seq=1

GTACGGAAGGAGAGGAAGCTGATCGCTGGGGGCTGGGAGAGCAATCCAGAGCCAGGGTGA  
AGGGGGCAGCAGGGCAGGGCACTGAGGGGACGTGATCAGTCCCATAGGAAGAGGAGGAGG  
AAGCCGGGGGGTCCCCGGTGGGTACCTGATGACCTCTCTGTGGCCATTCTTGGCAGCCAA  
GTGCAGGGGCGTGGTGTAGTTGGGGTCGCACGGGTCCTTGGCCTCCCC

>8340 len=229 tot-seq=1

CCGGCCAGGGCCATGAGCCCGGTGGAAATCCCCAGGATGCGCCGGGCCCTTTCCGGTCA  
TTCAGTCCCGCCCGGCGGAAATCAGGATGGACATGGCCGCCGGGACCCCGGCGGAGGAC  
AGGGCTACCAGCAGCAGGTACAGGGGATAGGCGATCTGGTACAGCCCGATGCCCTCCCCG  
CCCAGCAGCCGGGAAAGCAGGATCCGATTCACGGACCCAGGATTTTAA

>8341 len=229 tot-seq=1

CACCTTGAGCCCAGAAATTTGAGGCTGCAGTGAGTCATGATTGCGCCACTGTACCCAGCC  
TGGGTAACAGAGTGACACCCAGCCTTTTTATTTGTGGATAGCTCAAAGAAGTCATTTACA  
AAATGCCTTTTGTTCAAAGCACAGCTTTTCATAAAAAGCAAGGCTCACATTTAATAGA  
TGCTCTGGTACATAGGTGTGTGTTGAGAGCCGCTGGGGACTCAGGAAGC

>8342 len=229 tot-seq=1

TGGAGGCCTATTGCGAGTGCATGTTTGTGTGTGAGAGCATGCCCTCACGAGTGTGCAGGG  
GTGTGTGGGGTGCAGGTGATACATGCACAGGTGTGTTTCGTGTGTATGCAGGAGTGGGCGG  
GTGCACAGACGTGCACCTGTGGGCAGGAGTGACCTCAGAGACTCCTTCCCGCAGATGCCT  
CGGTCGCAGGGCCCCAGCCCGCGTGGTTGGTACCTCAGAGACTCCTT

>8343 len=230 tot-seq=1

GGTCATTCTAAGAAGATCATAGAAGTGTCTCATTTAACTTAGAATTTGTAAAAAGTAG  
ATTGGTGGGCTATGGTACAGTGTGCAAGTCCAGAACTATGCCTTATTTTAAAATAAAAA  
ATTTCCCTAATTTAATGTAACATTTGTAAATTATGTTGTTGAAATTTAAAGCTGAACG  
AAATAAGCATGGCGCATTGCCTTCAAAGCGCAGCATCCGTTCTTTAACGT

>8344 len=230 tot-seq=1

TGGTTTAGTCTTGCAGGGAATTCAGGGAAGCTTGGATTTGCTGAAGCTCTAGACGAGTTT  
GGGCTGGGATATGGAAACAGCATGGAGCCGGGGCCCTTCTGCACGCTGGAGTCTGAGTAG  
TTGCACCCTGGTGCAGCCATAGGTGTTCCCCACCTGGAGCACAGCTGTGGATAGAAGCTG  
GGAGAGCTGTGGAGGGAAGAGGAGGAGGAGGAGGGAGTCTCAGGGCAGTC

>8345 len=230 tot-seq=1

GGTTTAAAGGGAGCGTAGGCTGGAGATTAAGTGTGTTGTGAAATGTAGACGCTCAACGTC  
TGAATTGCAGCGCATACTGGTTTCCTTGAGTACGCACAACGTTGGCGGAATTCGTCGTGT  
AGCGGTGAAATGCTTAGATATGACGAAGAACTCCGATTGCGAAGGCAGCTAACGGGAGCG



CAACTGACGCTTAAGCTCGAAGGTGCGGGTATCAAACAGGATTAGAAACC

>8346 len=230 tot-seq=1

AGCTACCAGGGCTGGTAGATAAAGACCACAGGGTAGGGGCAGGGATAGGCATATCTGAAT  
TCAGTCTCTCCTTGGGCGGGGCTTGCTTCATTCAGCTCATGTGGAGGACGGGGTGTGGTT  
CTCAGTCCAATGGAGTTATATTCCGAGGGTGATTATGGCTGCCTCTGCTTACTCATCCAG  
GTTGCCAGGGAAGTAGGGGAAAGCCAGCAGTCACAGGCCTCACCTGCTC

>8347 len=230 tot-seq=1

CCAAGGGAACGAGGGGCGGGGAGGGGAGGGTGTAGCCACCCAGGGGCTCCCACGCTGCCT  
GAACAGCCAGCTGTCTACCTGCAGCTGAAACAGCTGGAGCCAAGGGCCCTGGAAGACTA  
TGATGGAGGGGCTCCCCGGCCCCCTGAGGCGTCTGCTGAATCCTGCAGGCAGCTCTGGCT  
CTTCTCTTCAAAGCCAAGTCTCCTCCCTGGGCCAAGGCCAAGTTTCC

>8348 len=231 tot-seq=1

TTGAGGTGAGCTTCGGAATGTGGCGGCATGCAGGACTTCCCACTGTAGTCTAAGCCCT  
TTCCTTGCAGCAGCATTTTCTGTACCAAGAGCTTTGCAATGTAAGCAACAAATGTCAG  
TAGGAGCTACTAAACGTAGACCGAATCACTTAAACTGGGTGCTATGGGTTGCAGTGATA  
TTTCTCAGATTTTCATTACACTCTCTCCAGTACACACTGACCCAGATGGGC

>8349 len=231 tot-seq=1

TCAGAGCATTCCCAACCTTTCTTTCAATGCTGTTACAAAAATAAAATGAGAAAGGATGC  
CATCGGTCCCCAGCAAGGACACAAAGGTTTATATCTTATGTCACATTCAAGATCCTTGCC  
TAAGGTGGACAGTTAAACTGCGTCATTTACAAAAATAATATGCTTTCAGCCGGCCTCAGC  
TTTCTAAGATGAGTAAACTCGAAAATGGAAACGGTTGATGCAATTTTAAA

>8350 len=232 tot-seq=1

GCAGGTCGTTGGGTCTTTCAGACACTTAAGATCTTGGCTCCTGTCCTAGGTGAGGAGG  
AAGCCAGGATTTGCACCCAGGAGCAACATGCTGTGTGGCCAGTTGCTTCTCTGGAAATCA  
GCCTCCACCACCTTCCCTGCCTCTGAGAAGGCTGGTGGAGGCCTGTCTCCTGAGGGA  
TCATTGCTTCTCGCCCTAGGTGTCTGCCCTAAGCGGCCGAGTGTGTTGTAGAG

>8351 len=232 tot-seq=1

TGACTAGAACGTGGAAGACCTGGTGCTCAGGAAGCTCACAGTGTGGGACACCAAGTGTCA  
GCAGTGGGTCTAGGAAGGGAGTCTGTCTTCTAGGAGTTTGATAAGGGAGGGGCTTACGA

GGCAGTGACACTTGGGCAGAGACTGAAGTGAGGAAGCAGTCCTGTATATAGATGACTAGG  
AGAAGACTGCAGACAGGGATTGGCCAATGAAAAGCCTGAGGCAGGAGTGTAC

>8352 len=232 tot-seq=1

TTGCAGTGAAACCCCGTCTCTACTAAAAATACAAAAAATTAGCCGGGCGTGGTGGCGGGC  
ACCTGTAGTTCCAGCTACTCGGAGGCTGAGGCAGGAGAATGGCGTGAACCCGAGAGGCAG  
AGCTTGCAGTAAGCTGAGATCGCGCCACTGCACTCCAACCTGGGCGACAGAGCGAGACGC  
CGTCTCAAAAAACCAAAAAACAAAAAAGAAGAAGAAGAAAGTATGTAAC

>8353 len=233 tot-seq=1

CAGTCTTACAGAATCCTTTGTGAGTTACTAACATTGAGAACCTCGTAGCAGTGTCTGGA  
ATCGTGTGTAAGGGACAACTTTCTGAAACCAGCAGCAGTGTGTTTGAATCCCATGTGAG  
GGAGAAACACTCAGAACCAGCAGCAGGGTTCTGGAATCCTATGTGAGTGACAAACTA  
AGAAATCTGCAGCAGTTTTATGGAATCCTATGTGAGGGACAAACTCAGAAC

>8354 len=233 tot-seq=1

TGGGTGTACAGGAACCTCTGTACTTTGTGCTCAATTTTGTGTGAACCTAAAACCTGCTC  
TAAAAAAGTCCATTTAAAAATTAATCACATATACACACAGAGATATATTCAATGTTTAC  
ATGGAATAGTTTAAAGAAAACCATACATTAAGCTCCACAGTCATCAACATCCCTGGGAG  
AAGTCACTGGGTAGGAGGTGGGAGAATGTAGAAACCCAGGTAACACCAATGG

>8355 len=233 tot-seq=1

GTTCTCCACAGGTCCTGTGGCTCACAAATGCTCATGTCTGACTTGGCCTCACAGCTCCTG  
GGACAGAACCTCTGAGAAGCTCTGGGAATGGCCAAAGTGGGTCCCCTAGGTTTTCTCTCC  
CCCTTGTTGAAATGCCTGAGATTCAGTATGATCATTTCACTCTTTGGGGAGAAGGTACT  
GCTGACCCCTGATATAATGCACTGCCTCTGGGGTCATGCATGAAGCAATGAGT

>8356 len=234 tot-seq=1

GCACACAGGAGCAGGGACTCAGACTAGGTAGTCTACACCATGCTTTTCAAGAACAGAGAC  
ATCGACTCTCCATTTGGGCTTTTAGACTCCTGGGGGAAAAAAGAGATTTCTACTTTGA  
GTTTGGAAAGAAAAACAGACAAAACGGGTCATGAGCCAAGAAATGCAATATAAGGTCAAG  
CCTATCTTGAAACATTTCCCGTTGCATTATATTCTCTAGAGTAGACATCT

>8357 len=234 tot-seq=1

GAGGAGGGCCCTCGGGGTTGAGGCCCTCCAGGCACCCCATGCATGACAAACCGTCACACT

TGTGAAGTCGGAGTGGGGAAGCCCCCTCCCTGCCCTTTCAGGCAAGGGTGACCCTGAATA  
ATGGTCTGTTCTCCATGCCTCAGTTTCCTGTCTGTAAAGGAGGCGACATCTACAATCT  
AAAAGGACTGTGGGAATGTCAGCACAGTCAGCTCCTGCCCCGGGCTGGCCCCCA

>8358 len=235 tot-seq=1

ACTCTCTGACTTCATTCCTGATTCTCTGTGCAGTTCTCTAGCAGCAACTCAAGGCCCA  
TAAGTCAGGGAACCCCAACTTTGGCTGCATCTCCACCCCTGGAACAGTGTCTCAGCGC  
TTCTCTGAAACCAACAACACCTGACATGGAATAAGCCCAGTCAAGCTCTCCAGTGGGGC  
GGAAGGCGGTCCCACACAGAACCAATGTTTCTAGGTTTTCTGGAGGGCTTGGA

>8359 len=235 tot-seq=1

GGGAAGGAAGGAGAAGTCCAGGATGTTTGAAGCGCAGGGCATGGGTCTAGCTGGAGGCC  
AGGCTTCACATGCAGACGTGATAAAAGATGAGGCTGAAGACAGAAGTCATAAGGACAGGC  
CTCGTGGGCCAGCTTCAGGACGTGGTACTCCATTCTGACCAGGATGGGAGTGAGCAGCGT  
CTGAAGGATTTTAGACAAGAGCACGGGGTCAGGTGTGCCATCAGAAAGTTTGCT

>8360 len=236 tot-seq=1

GATCAGAAATTCAGGTTATCCTTAGGTCCATGGTGAATTTGAACTGAACTTGAATTTA  
TGTCATTCTGCATCCAAAAGGAATGCAGACCCCATAGCTCACAGTGCAAACCAGATGTC  
TACCACCTGGTCAGGACACAGGGAAAATAAGCGGCTGCTTTGATTTAGAGATGCTTAGTA  
GCCTGAGAAACGATAATTAAGGTTCTGTGGATGTGTCCAGAAGTCCCTCCTCCGC

>8361 len=236 tot-seq=1

CATCATGATAGGGTGGTGTATTAGTCAGGGTTCTCTAGAGTCACAGAACTTATGGATAGT  
CTCTATATAGTAAAAGAACTTATTGATGACTTACAGTCGGCAGCCCAATTCCAACAATG  
GTTTCAGTCGAGCTGTGAATGGAAGACCGAGGATCTAGCAGTTACTCAATCTCACACAGC  
AAGCAGGAGAAGGAGCAAGAGCCAGACTCCCTTCTTCAATGTCCTTATATTGTCT

>8362 len=237 tot-seq=1

GCTGGGCCACTTTCTGAGTCACAGAGGGGTGTGGGTGATGCCAGGAAGCCGAGCTGAAAA  
TTGACCTTCTCCCTGAGGTCAGTCCCAACACAGCGCTCATCACATGGCAAGCATTCCCA  
ATGGCTTAACCCGCTGCAAAGGAGAAGAGGGCAACTCGATGGGCATGTGATATGAAACTA  
GCATTGGAAAATCCACCAGTCCCTCTCCCTAGCAAGAAGGACCAGCAGACAACATCC

>8363 len=238 tot-seq=1

ATGTGGCACACATATCAGAGTGCCTGGTGCTAATGAGTGAAGTAACTCAACAGAGGTCAC  
ACAGCTAGTGAGAGCCAGGGCTGGGGTTCAAATTTAATAATTCTGGTAGCTAAGAGCATA  
AGATTTAGGACCAATCTTGATCTTGATTCCTTACTTGTGAAATGGAGGTTGCCTATC  
TATCCTGCATCTCTGTGATGAGAAATAAATAATTTGTAAAGCATTTAGTACAGCAC

>8364 len=239 tot-seq=1

CTGTGGACACATGGAGTCTGGCTGTTTGCTCAAGCAGCTTGTTTGTACTTTCTGGCCCTG  
ATTGTGCCTGATCTCTAGTGTTCCACTTCTGTCGTATGCTTTTCATTTGGTTCTGTGAA  
GGAACAATGGCTTGCAGGCCAAATATGGATTATTTTTGTGAATAAAGTTTTATTGTAAGG  
TAGCCACACCCTTTGTAATAATAATTCAAGTAATTATTGTCTACAGCAGCTTTGACACT

>8365 len=241 tot-seq=1

GCAAACAGCTTGTGTAAGGAACTTCTGTTTTAAAAACCATCAGATTTTCATGAGACTTAT  
TCACTATCATGAGAAAAGCATGGGAAAGACCTGCCCTCATGATTTAATTACTTCCCCTA  
GGTCCCTCCCACATGTGGGAATTCAAGATAAGATTTGGGTGGGGACAGAGCCAAACCATA  
TCAATCCCCCGGCCCTCCCAAATCTCATGTCCTCATATTTCAAACCAATCATGCCTC

C

>8366 len=241 tot-seq=1

GATGTGAGCAAATATTTGGGGGTTCTTACTATGAGCCAGACATGGCATTACAGGTAAG  
AGCTGATCCTAACTCTCAAGTAACTCAGTTTCATTTAAAAAGTCAAAAATACTCACAAT  
AATTCATCATGAATACAGATGAGAGCAGCGTAACAGAGGCAGAGACCAACAGAGTGAGGA  
GGAGAGATGGGCCGCTCTGTGGGCCTGGAAAGCTTGGCCACAGGGGCCTGCGCATGCCAT

G

>8367 len=241 tot-seq=1

GATTTTAACTTAGACTGCACCACCAGGAGGCACCCACTGAGGCATCAGAATCAGGAAGAG  
GAGTGGCAGCCTCTATGCTTCCATCAGGAGCAGGCAGATGTGTGAGCTTCCACAGCCGGT  
GGATATGGAGTGCGGGAAGCTGCCGCTTCCAAGGAGGTTCTGCAGATCACCTGCGTTGG  
TCCGCAGGTCGCTGAGATCATCAGCCAGCCATGTGTTCTGCGATTCTTGACTTCTGAA

A
