# Supplementary material for: Association of high-risk sexual behaviour with diversity of the vaginal microbiota and abundance of Lactobacillus
Source: PubMed Central journal article supplement (PMC5667760; doi:10.1371/journal.pone.0187612), 2017-11-02
Supplement: pone.0187612.s003.pdf [file pone.0187612.s003.pdf]

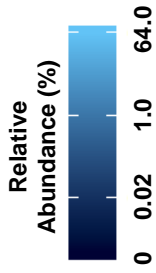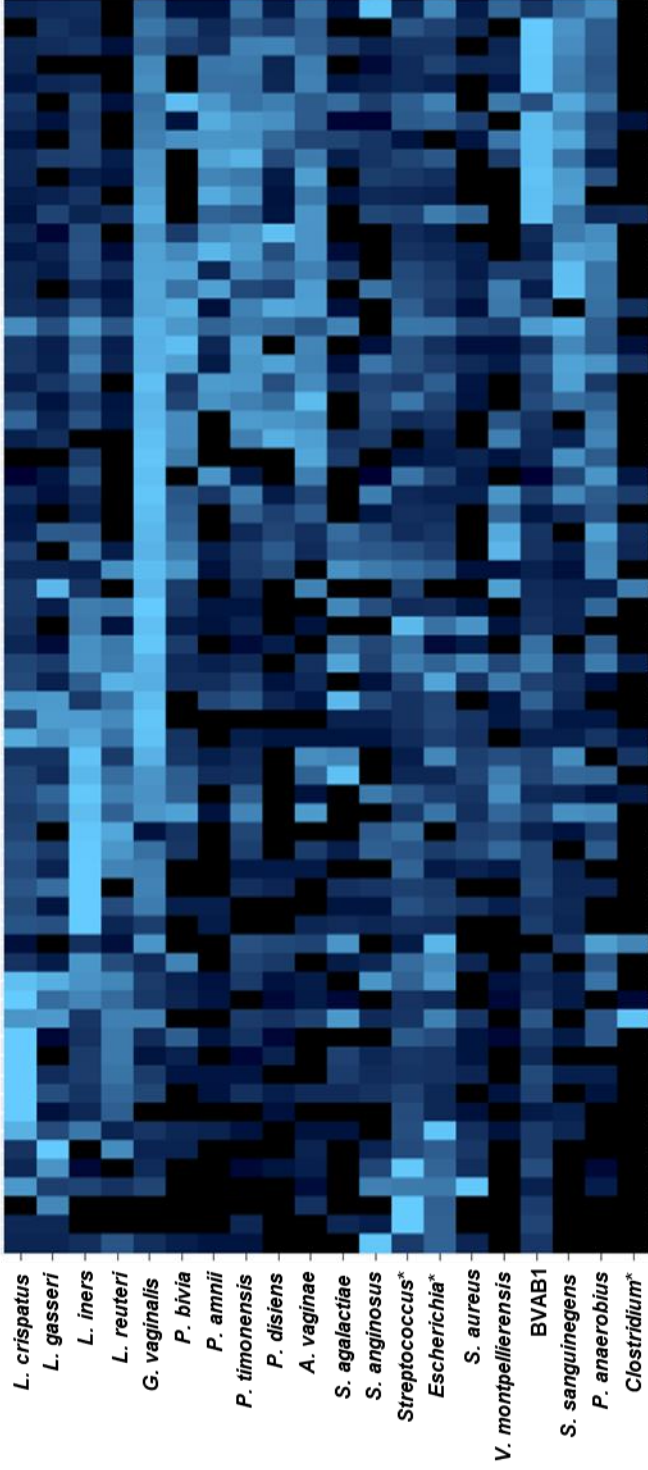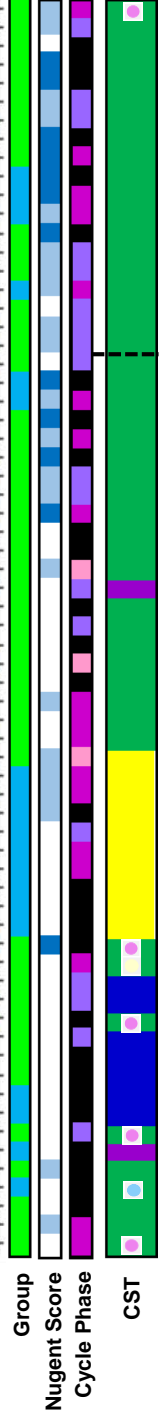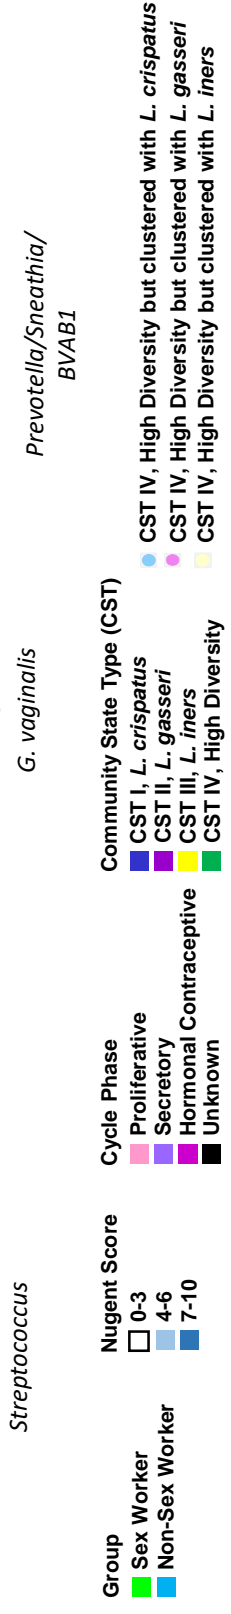

Streptococcus

*G. vaginalis*

*Prevotella/Sneathia/BVAB1*
