# Supplementary material for: Association of high-risk sexual behaviour with diversity of the vaginal microbiota and abundance of Lactobacillus
Source: PLoS One. 2017 Nov 2;12(11):e0187612. doi: 10.1371/journal.pone.0187612 (PMC5667760; doi:10.1371/journal.pone.0187612)
Supplement: S2 Table — List of the number of 16S reads per sample obtained by Illumina sequencing. (XLSX) [file pone.0187612.s005.xlsx]

## Sheet: library_stats_rdp-training_gg20
Counts/sample detail:
CK12: 70667.0
CK13: 69324.0
CK14: 81972.0
CK15: 66123.0
CK16: 84895.0
CK17: 69875.0
CK18: 68864.0
CK19: 84221.0
CK1B.2: 105489.0
CK20: 56162.0
CK21: 123588.0
CK22: 72638.0
CK23: 30244.0
CK24: 105785.0
CK25: 109165.0
CK26: 46626.0
CK27: 13166.0
CK28: 139439.0
CK29: 85182.0
CK2B.1: 94831.0
CK30: 35506.0
CK31: 75718.0
CK32: 56079.0
CK33: 61417.0
CK34: 63186.0
CK35: 38663.0
CK36: 106843.0
CK37: 52612.0
CK38: 68310.0
CK39: 86796.0
CK3A: 100314.0
CK40: 62551.0
CK41: 61785.0
CK42: 57737.0
CK43: 7421.0
CK44: 74720.0
CK45: 47958.0
CK46: 45187.0
CK47: 51365.0
CK48: 44093.0
CK49: 54445.0
CK4A: 106220.0
CK50: 62760.0
CK51: 68441.0
CK52: 67054.0
CK53: 60401.0
CK54: 67333.0
CK55: 53280.0
CK56: 43725.0
CK57: 53129.0
CK58: 29044.0
CK59: 46265.0
CK5B: 115021.0
CK6: 72577.0
CK60: 43804.0
CK61: 59679.0
CK62: 53465.0
CK63: 17360.0
CK64: 32069.0
CK65: 56365.0
CK66: 49215.0
CK67: 26669.0
CK68: 64420.0
CK69: 41689.0
CK7: 71286.0
CK70: 20273.0
CK8: 99228.0
